# Supplementary material
Source: PubMed Central journal article supplement (PMC7199387)
Supplement: NIHMS1561410-supplement-SIfile-PdMethods.pdf [file NIHMS1561410-supplement-SIfile-PdMethods.pdf]

# Development and Elucidation of a Pd-based Cyclization/Oxygenation Sequence for Natural Product Synthesis

Heng Yi,<sup>+</sup> Pengfei Hu,<sup>+</sup> and Scott A. Snyder\*

Department of Chemistry, The University of Chicago, 5735 S. Ellis Avenue, Chicago, IL 60637  
(USA)

## Supporting Information

|                                                                        |     |
|------------------------------------------------------------------------|-----|
| <u>Table of Contents</u>                                               |     |
| General procedures                                                     | S2  |
| Abbreviations                                                          | S2  |
| Preparation of triflates                                               | S3  |
| Preparation of nucleophilic salts                                      | S10 |
| General procedure for the Pd-based cyclization                         | S13 |
| Mechanism study                                                        | S19 |
| Synthesis of botrydial and 10-oxodehydrodihydrobotrydial               | S22 |
| Select substrate limitations for a terminating oxygenation             | S29 |
| References                                                             | S30 |
| <sup>1</sup> H and <sup>13</sup> C NMR data for selected intermediates | S31 |

## Experimental Data for Compounds

**General Procedures.** All reactions were carried out under an argon atmosphere with dry solvents under anhydrous conditions, unless otherwise noted. Dry tetrahydrofuran (THF), toluene, dimethylformamide (DMF), diethyl ether (Et<sub>2</sub>O) and dichloromethane (CH<sub>2</sub>Cl<sub>2</sub>) were obtained by passing commercially available pre-dried, oxygen-free formulations through activated alumina columns. Yields refer to chromatographically and spectroscopically (<sup>1</sup>H and <sup>13</sup>C NMR) homogeneous materials, unless otherwise stated. Reagents were purchased at the highest commercial quality and used without further purification, unless otherwise stated. Reactions were magnetically stirred and monitored by thin-layer chromatography (TLC) carried out on 0.25 mm E. SiliCycle silica gel plates silica gel plates (60F-254) using UV light as visualizing agent, and an ethanolic solution of phosphomolybdic acid and cerium sulfate, and heat as developing agents. SiliCycle silica gel (60, academic grade, particle size 0.040–0.063 mm) was used for flash column chromatography. Preparative thin-layer chromatography separations were carried out on 0.50 mm E. Merck silica gel plates (60F-254). NMR spectra were recorded on Bruker 500 MHz and 400 MHz instruments and calibrated using residual undeuterated solvent as an internal reference. The following abbreviations were used to explain the multiplicities: s = singlet, d = doublet, t = triplet, q = quartet, sx = sextet, m = multiplet. IR spectra were recorded on a Perkin-Elmer 1000 series FT-IR spectrometer. High-resolution mass spectra (HRMS) were recorded on an Agilent 6244 Tof-MS using ESI (Electrospray Ionization) or CI (Chemical Ionization) at the University of Chicago Mass Spectroscopy Core Facility.

**Abbreviations.** EtOAc = ethyl acetate, THF = tetrahydrofuran, DBU = 1,8-diazabicyclo[5.4.0]undec-7-ene, MVK = methyl vinyl ketone, EtOH = ethanol, MeOH = methanol, KHMDS = potassium bis(trimethylsilyl)amide, Bn = benzyl, Ac = acetyl, *t*-BuOH = *t*-butanol, *t*-BuOK = potassium *t*-butoxide, LiHMDS = lithium bis(trimethylsilyl)amide, Ad = adamantyl, Phth = phthalimide, Piv = pivaloyl, MPO = 4-methoxypyridine *N*-oxide, LDA = lithium diisopropylamide, TBAF = tetra-*n*-butylammonium fluoride, DIBAL-H = diisobutylaluminum hydride, DMSO = dimethyl sulfoxide, IBX = 2-iodoxybenzoic acid, *n*-BuLi = *n*-butyllithium, *t*-AmylOH = 2-methylbutan-2-ol.

## Preparation of triflates

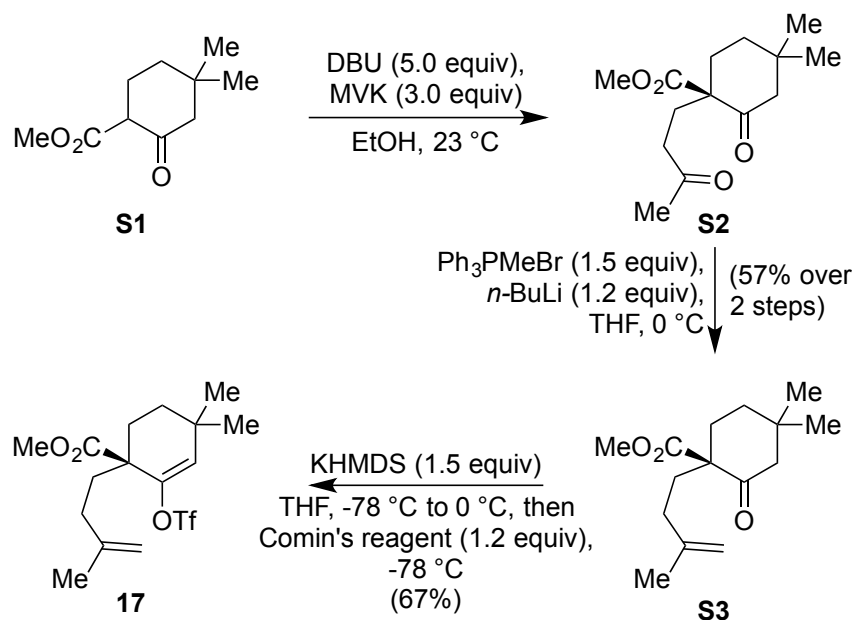

**Triflate 17.** To a solution of methyl 4,4-dimethyl-2-oxocyclohexane-1-carboxylate (**S1**) (1.84 g, 10.0 mmol, 1.0 equiv) in EtOH (50 mL) at 23 °C was added DBU (7.60 g, 50.0 mmol, 5.0 equiv) and methyl vinyl ketone (2.10 g, 30.0 mmol, 3.0 equiv). The resultant solution was then stirred at 23 °C for 3 h. Upon completion, the reaction contents were diluted with EtOAc (30 mL) and quenched by the addition of saturated aqueous  $\text{NH}_4\text{Cl}$  (30 mL). The resultant mixture was poured into a separatory funnel and the layers were separated. The aqueous layer was then extracted with EtOAc ( $2 \times 30$  mL). The combined organic layers were washed with  $\text{H}_2\text{O}$  (30 mL) and brine (30 mL) before being dried ( $\text{Na}_2\text{SO}_4$ ), filtered, and concentrated. The resultant residue was purified by flash column chromatography (silica gel, hexanes:EtOAc, 5:1) to provide the desired Michael adduct **S2** (2.41 g, 95% yield) as a pale yellow oil. **S2**:  $R_f = 0.23$  (silica gel, hexanes:EtOAc = 5:1); IR (film)  $\nu_{\text{max}}$  3628, 3414, 2956, 1713, 1435, 1369, 1102, 1075, 940, 853  $\text{cm}^{-1}$ ;  $^1\text{H NMR}$  (500 MHz,  $\text{CDCl}_3$ )  $\delta$  3.72 (s, 3 H), 2.56–2.49 (m, 1 H); 2.43–2.39 (m, 1 H), 2.34 (d,  $J = 13.3$  Hz, 1 H), 2.18–2.13 (m, 1 H), 2.12 (s, 3 H), 2.11–2.07 (m, 1 H), 1.89–1.83 (m, 1 H), 1.65–1.49 (m, 2 H), 1.51–1.49 (m, 1 H), 1.02 (s, 3 H), 0.87 (s, 3 H);  $^{13}\text{C NMR}$  (125 MHz,  $\text{CDCl}_3$ )  $\delta$  207.7, 207.4, 172.4, 58.8, 53.8, 52.5, 38.8, 36.7, 35.6, 31.9, 31.1, 30.0, 28.1, 25.7; HRMS (ESI) calcd for  $\text{C}_{14}\text{H}_{23}\text{O}_4^+$  [ $\text{M} + \text{H}^+$ ] 255.1591, found 255.1593. Next, to a suspension of  $\text{Ph}_3\text{PCH}_2\text{Br}$  (2.68 g, 7.50 mmol, 1.5 equiv) in THF (30 mL) at 0 °C was added  $n\text{-BuLi}$  (2.40 mL, 2.5 M in THF, 6.00 mmol, 1.2 equiv). The resultant mixture was stirred at 0 °C for 15 min and then a solution of **S2** (1.27 g, 5.00 mmol, 1.0 equiv) in THF (20 mL) was added. The resultant mixture was stirred at 0 °C for 2 h. Upon completion, the reaction contents were diluted with EtOAc (30 mL) and quenched by the addition of saturated aqueous  $\text{NH}_4\text{Cl}$  (30 mL). The mixture was warmed to 23 °C, poured into a separatory funnel, and the resultant layers were separated. The aqueous layer was then extracted with EtOAc ( $2 \times 30$  mL). The combined organic layers were washed with brine (30 mL) before being dried ( $\text{Na}_2\text{SO}_4$ ), filtered, and concentrated. The resultant residue was purified by flash column chromatography (silica gel, hexanes:EtOAc,

50:1) to provide ketone **S3** (0.756 g, 60% yield) as a pale yellow oil. **S3**:  $R_f = 0.68$  (silica gel, hexanes:EtOAc, 5:1); IR (film)  $\nu_{\max}$  2956, 2857, 1714, 1650, 1454, 1369, 1252, 1199, 1100, 887  $\text{cm}^{-1}$ ;  $^1\text{H}$  NMR (500 MHz,  $\text{CDCl}_3$ )  $\delta$  4.70 (s, 1 H), 4.68 (s, 1 H), 3.72 (s, 3 H), 2.46 (dt,  $J = 13.6, 3.7$  Hz, 1 H), 2.31 (d,  $J = 13.1$  Hz, 1 H), 2.15 (dd,  $J = 13.1, 2.4$  Hz, 1 H), 2.06–2.00 (m, 1 H), 1.92–1.86 (m, 2 H), 1.72 (s, 3 H), 1.70–1.57 (m, 3 H), 1.51–1.47 (m, 1 H), 1.02 (s, 3 H), 0.87 (s, 3 H);  $^{13}\text{C}$  NMR (125 MHz,  $\text{CDCl}_3$ )  $\delta$  207.3, 172.3, 145.3, 110.0, 59.4, 53.9, 52.3, 36.7, 35.7, 32.7, 32.2, 31.4, 31.3, 25.5, 22.6; HRMS (ESI) calcd for  $\text{C}_{15}\text{H}_{25}\text{O}_3^+ [\text{M} + \text{H}^+]$  253.1798, found 253.1805. Finally, to a solution of ketone **S3** (1.26 g, 5.00 mmol) in THF (40 mL) at  $-78$  °C was added KHMDS (7.50 mL, 1.0 M in THF, 7.50 mmol, 1.5 equiv). The resultant yellow solution was then stirred at  $0$  °C for 90 min before being cooled to  $-78$  °C. A solution of Comin's reagent (2.35 g, 6.00 mmol, 1.2 equiv) in THF (10 mL) was then added. The resultant solution was stirred at  $-78$  °C for 1 h before being diluted with EtOAc (30 mL) and quenched by the addition of saturated aqueous  $\text{NH}_4\text{Cl}$  (30 mL). The mixture was warmed to  $0$  °C, poured into a separatory funnel, and the resultant layers were separated. The aqueous layer was then extracted with EtOAc ( $2 \times 30$  mL). The combined organic layers were washed with brine (30 mL) before being dried ( $\text{Na}_2\text{SO}_4$ ), filtered, and concentrated. The resultant residue was purified by flash column chromatography ( $\text{Et}_3\text{N}$ -buffered silica gel, hexanes) to provide triflate **17** (1.29 g, 67% yield) as a colorless oil. **17**:  $R_f = 0.69$  (silica gel, hexanes: EtOAc, 10:1); IR (film)  $\nu_{\max}$  2962, 2869, 1739, 1669, 1651, 1417, 1214, 1144, 1004, 950, 899, 816  $\text{cm}^{-1}$ ;  $^1\text{H}$  NMR (500 MHz,  $\text{CDCl}_3$ )  $\delta$  5.63 (s, 1 H), 4.73 (s, 1 H), 4.67 (s, 1 H), 3.74 (s, 3 H), 2.23–2.18 (m, 1 H), 2.05–1.92 (m, 3 H), 1.87–1.76 (m, 2 H), 1.73 (s, 3 H), 1.50–1.48 (m, 2 H), 1.10 (s, 3 H), 1.06 (s, 3 H);  $^{13}\text{C}$  NMR (125 MHz,  $\text{CDCl}_3$ )  $\delta$  173.1, 146.8, 144.7, 129.9, 119.3, 117.0, 110.6, 52.3, 50.2, 33.48, 33.46, 33.3, 32.2, 29.9, 29.1, 27.8, 22.3; HRMS (ESI) calcd for  $\text{C}_{16}\text{H}_{24}\text{O}_5\text{F}_3\text{S}^+ [\text{M} + \text{H}^+]$  385.1291, found 385.1298.

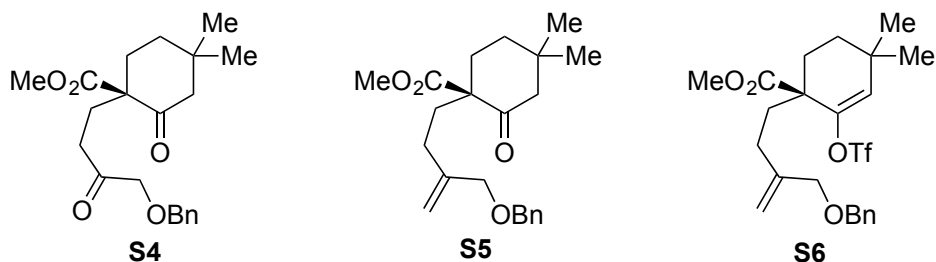

**Triflate S6.** Prepared as described above starting from 4,4-dimethyl-2-oxocyclohexane-1-carboxylate (0.552 g, 3.00 mmol, 1.0 equiv) and 1-(benzyloxy)but-3-en-2-one<sup>[1]</sup> (1.58 g, 9.00 mmol, 3.0 equiv) to afford triflate **S6** (0.139 g, 9% overall yield) as a colorless oil. **S4**:  $R_f = 0.29$  (silica gel, hexanes:EtOAc, 5:1); IR (film)  $\nu_{\max}$  3510, 2954, 2866, 1712, 1454, 1248, 1201, 1101  $\text{cm}^{-1}$ ;  $^1\text{H}$  NMR (500 MHz,  $\text{CDCl}_3$ )  $\delta$  7.42–7.30 (m, 5 H), 4.57 (s, 2 H), 4.04 (s, 2 H), 3.70 (s, 3 H), 2.59–2.52 (m, 1 H), 2.45–2.37 (m, 2 H), 2.34 (d,  $J = 13.2$  Hz, 1 H), 2.16–2.11 (m, 2 H), 1.92–1.86 (m, 1 H), 1.62–1.49 (m, 3 H), 1.02 (s, 3 H), 0.87 (s, 3 H);  $^{13}\text{C}$  NMR (125 MHz,  $\text{CDCl}_3$ )  $\delta$  207.6, 207.2, 172.3, 137.2, 128.5, 128.0, 127.9, 74.8, 73.4, 58.8, 53.8, 52.4, 36.7, 35.6, 34.2, 31.8, 31.1, 27.6, 25.6; HRMS (ESI) calcd for  $\text{C}_{21}\text{H}_{29}\text{O}_5^+ [\text{M} + \text{H}^+]$  361.2010, found 361.2009. **S5**:  $R_f = 0.50$  (silica gel, hexanes:EtOAc, 10:1); IR (film)  $\nu_{\max}$  3443, 3030, 2954, 2863, 1713, 1652, 1496, 1368, 1199, 1098, 1028, 904, 698  $\text{cm}^{-1}$ ;  $^1\text{H}$  NMR (500 MHz,  $\text{CDCl}_3$ )  $\delta$  7.37–7.28 (m, 5 H), 5.06 (s, 1 H), 4.96 (s, 1 H), 4.48 (s, 2 H), 3.96 (s, 2 H), 3.70 (s, 3 H), 2.58–2.52 (m, 1 H), 2.45–2.37 (m, 2 H), 2.33 (d,  $J = 13.2$  Hz, 1 H), 2.16–2.09 (m, 2 H), 1.91–1.85 (m, 1 H), 1.64–1.56 (m, 2 H), 1.50–1.48 (m, 1 H), 1.01 (s, 3 H), 0.86 (s, 3 H);  $^{13}\text{C}$  NMR (125 MHz,

CDCl<sub>3</sub>) δ 207.1, 172.2, 145.5, 138.4, 128.3, 128.1, 127.7, 127.5, 73.0, 72.0, 59.4, 53.9, 52.3, 36.7, 35.7, 35.1, 32.7, 31.31, 31.28; HRMS (ESI) calcd for C<sub>22</sub>H<sub>31</sub>O<sub>4</sub><sup>+</sup> [M + H<sup>+</sup>] 359.2217, found 359.2231. **S6**: R<sub>f</sub> = 0.62 (silica gel, hexanes:EtOAc, 10:1); IR (film) ν<sub>max</sub> 3032, 2959, 2866, 1738, 1669, 1454, 1416, 1365, 1213, 1144, 1093, 901, 817 cm<sup>-1</sup>; <sup>1</sup>H NMR (500 MHz, CDCl<sub>3</sub>) δ 7.37–7.28 (m, 5 H), 5.63 (s, 1 H), 5.08 (s, 1H), 4.96 (s, 1 H), 4.51–4.46 (m, 2 H), 3.96 (dd, *J* = 16.1, 12.5 Hz, 1 H), 3.72 (s, 3 H), 2.22–2.18 (m, 1 H), 2.12–2.02 (m, 3 H), 1.89–1.83 (m, 1 H), 1.80–1.75 (m, 1 H), 1.51–1.48 (m, 2 H), 1.09 (s, 3 H), 1.05 (s, 3 H); <sup>13</sup>C NMR (125 MHz, CDCl<sub>3</sub>) δ 173.1, 146.7, 145.0, 138.2, 130.1, 128.4, 127.7, 127.6, 122.1, 119.6, 117.0, 114.5, 112.6, 73.0, 72.0, 52.4, 50.2, 33.5, 33.4, 33.3, 29.9, 29.0, 27.8, 27.6; HRMS (ESI) calcd for C<sub>23</sub>H<sub>30</sub>O<sub>6</sub>F<sub>3</sub>S<sup>+</sup> [M + H<sup>+</sup>] 491.1710, found 491.1694.

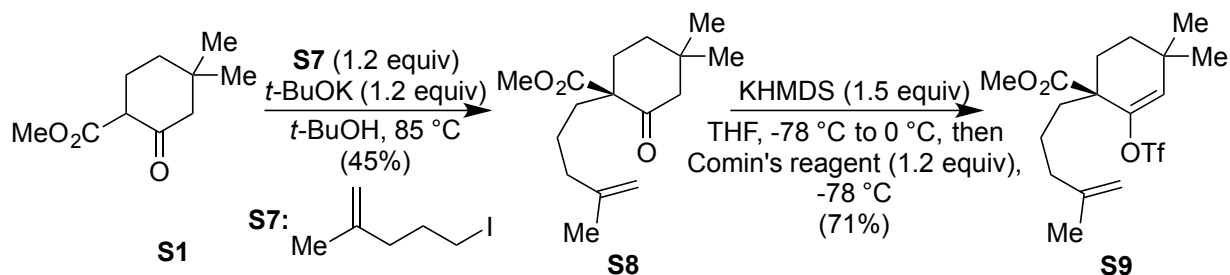

**Triflate S9.** To *t*-BuOK (2.4 mL, 1.0 M in *t*-BuOH, 2.40 mmol, 1.2 equiv) at 23 °C was added methyl 4,4-dimethyl-2-oxocyclohexane-1-carboxylate (0.368 g, 2.00 mmol, 1.0 equiv). The resultant mixture was stirred at 23 °C for 10 min before 5-iodo-2-methylpent-1-ene (**S7**)<sup>[2]</sup> (0.504 g, 2.40 mmol, 1.2 equiv) was added. The resultant mixture was heated to 85 °C and stirred at that temperature for 18 h.<sup>[3]</sup> Upon completion, the reaction contents were cooled to 23 °C, diluted with EtOAc (10 mL), and quenched by the addition of saturated aqueous NH<sub>4</sub>Cl (10 mL). The mixture was poured into a separatory funnel and the layers were separated. The aqueous layer was then extracted with EtOAc (2 × 10 mL). The combined organic layers were washed with brine (10 mL) before being dried (Na<sub>2</sub>SO<sub>4</sub>), filtered, and concentrated. The resultant residue was purified by flash column chromatography (silica gel, hexanes:EtOAc, 100:1→50:1) to provide ketone **S8** (0.241 g, 45% yield) as a pale yellow oil. **S8**: R<sub>f</sub> = 0.45 (silica gel, hexanes:EtOAc, 10:1); IR (film) ν<sub>max</sub> 3073, 2956, 2869, 1712, 1649, 1456, 1255, 1199, 1168, 1101, 888, 749 cm<sup>-1</sup>; <sup>1</sup>H NMR (500 MHz, CDCl<sub>3</sub>) δ 4.70 (s, 1 H), 4.66 (s, 1 H), 3.72 (s, 3 H), 2.44 (dt, *J* = 13.7, 3.6 Hz, 1 H), 2.30 (d, *J* = 13.1 Hz, 1 H), 2.14 (dd, *J* = 13.1, 2.3 Hz, 1 H), 2.00 (t, *J* = 7.4 Hz, 1 H), 1.88–1.82 (m, 1 H), 1.69 (s, 3 H), 1.65–1.46 (m, 4 H) 1.36–1.30 (m, 1 H), 1.01 (s, 3 H), 0.86 (s, 3 H); <sup>13</sup>C NMR (125 MHz, CDCl<sub>3</sub>) δ 207.3, 172.5, 145.2, 110.2, 59.6, 53.9, 52.2, 37.9, 36.7, 35.7, 34.0, 31.4, 31.3, 25.5, 22.2, 22.1; HRMS (ESI) calcd for C<sub>16</sub>H<sub>27</sub>O<sub>3</sub><sup>+</sup> [M + H<sup>+</sup>] 267.1955, found 267.1955. Pressing forward, triflate **S9** was prepared as described above starting from **S8** (0.084 g, 0.31 mmol, 1.0 equiv) to afford triflate **S9** (0.089 g, 71% yield) as a colorless oil. **S9**: R<sub>f</sub> = 0.58 (silica gel, hexanes:EtOAc, 10:1); IR (film) ν<sub>max</sub> 2960, 2890, 1739, 1670, 1651, 1417, 1212, 1144, 1005, 900, 816 cm<sup>-1</sup>; <sup>1</sup>H NMR (500 MHz, CDCl<sub>3</sub>) δ 5.60 (s, 1 H), 4.71 (s, 1 H), 4.66 (s, 1 H), 3.72 (s, 3 H), 2.22–2.17 (m, 1 H), 2.06–1.97 (m, 2 H), 1.86–1.64 (m, 3 H), 1.68 (s, 3 H), 1.49–1.38 (m, 4 H), 1.09 (s, 3 H), 1.05 (s, 3 H); <sup>13</sup>C NMR (125 MHz, CDCl<sub>3</sub>) δ 173.3, 147.0, 144.9, 129.7, 119.6, 117.0, 110.5, 52.3, 50.2, 37.8, 34.6, 33.5, 33.4, 29.9, 29.3, 27.8, 22.1, 22.0; HRMS (ESI) calcd for C<sub>17</sub>H<sub>26</sub>O<sub>5</sub>F<sub>3</sub>S<sup>+</sup> [M + H<sup>+</sup>] 399.1448, found 399.1454.

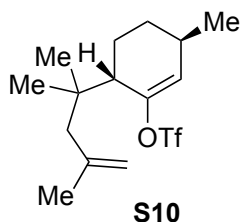

**Triflate S10.** Prepared as described above starting from **54**<sup>[4]</sup> (0.694 g, 3.33 mmol, 1.0 equiv) to afford triflate **S10** (0.985 g, 87% yield) as a colorless oil. **S10**:  $R_f = 0.48$  (silica gel, hexanes);  $[\alpha]_D^{20} = +57.0^\circ$  ( $c = 0.53$  in  $\text{CHCl}_3$ ); IR (film)  $\nu_{\text{max}}$  2963, 2874, 1666, 1643, 1417, 1209, 1144, 969, 893  $\text{cm}^{-1}$ ;  $^1\text{H}$  NMR (500 MHz,  $\text{CDCl}_3$ )  $\delta$  5.73 (s, 1 H), 4.89–4.87 (m, 1 H), 4.68–4.67 (m, 1 H), 2.46–2.42 (m, 1 H), 2.32–2.26 (m, 1 H), 2.12 (d,  $J = 13.2$  Hz, 1 H), 1.97 (d,  $J = 13.3$  Hz, 1 H), 1.98–1.92 (m, 1 H), 1.82–1.77 (m, 1 H), 1.78 (s, 3 H), 1.59–1.52 (m, 1 H), 1.15–1.08 (m, 1 H), 1.05 (s, 3 H), 1.04 (d,  $J = 7.1$  Hz, 3 H), 1.00 (s, 3 H);  $^{13}\text{C}$  NMR (125 MHz,  $\text{CDCl}_3$ )  $\delta$  151.5, 142.9, 128.2, 121.5, 119.8, 117.2, 114.9, 47.6, 46.6, 37.3, 30.4, 30.1, 26.7, 26.5, 25.6, 25.5, 21.2; HRMS (CI) calcd for  $\text{C}_{15}\text{H}_{24}\text{O}_3\text{F}_3\text{S}^+$   $[\text{M} + \text{H}^+]$  343.1393, found 343.1391.

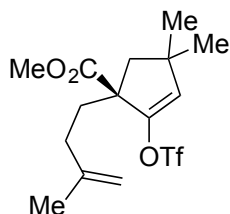

**Triflate S11.** Prepared as described above starting from methyl 4,4-dimethyl-2-oxocyclopentane-1-carboxylate<sup>[5]</sup> (0.200 g, 1.17 mmol, 1.0 equiv) and 5-iodo-2-methylpent-1-ene (0.275 g, 1.40 mmol, 1.2 equiv) to afford triflate **S11** (0.298 g, 69% yield) as a pale yellow oil. **S11**:  $R_f = 0.58$  (silica gel, hexanes:EtOAc, 10:1); IR (film)  $\nu_{\text{max}}$  2960, 2870, 1740, 1654, 1424, 1366, 1249, 1215, 1142, 1047, 995, 842, 805, 762, 602  $\text{cm}^{-1}$ ;  $^1\text{H}$  NMR (500 MHz,  $\text{CDCl}_3$ )  $\delta$  5.60 (s, 1 H), 4.73 (s, 1 H), 4.69 (s, 1 H), 3.74 (s, 3 H), 2.44 (d,  $J = 13.5$  Hz, 1H), 2.10–2.04 (m, 1 H), 1.95–1.91 (m, 2 H), 1.78–1.73 (m, 1 H), 1.74 (d,  $J = 13.5$  Hz, 1 H), 1.73 (s, 3 H), 1.17 (s, 3 H), 1.14 (s, 3 H);  $^{13}\text{C}$  NMR (125 MHz,  $\text{CDCl}_3$ )  $\delta$  173.5, 145.9, 144.5, 127.2, 122.2, 119.7, 117.2, 114.6, 110.5, 57.9, 52.4, 45.9, 40.0, 34.1, 32.6, 29.9, 28.9, 22.4; HRMS (ESI) calcd for  $\text{C}_{15}\text{H}_{22}\text{O}_5\text{F}_3\text{S}^+$   $[\text{M} + \text{H}^+]$  371.1135, found 371.1141.

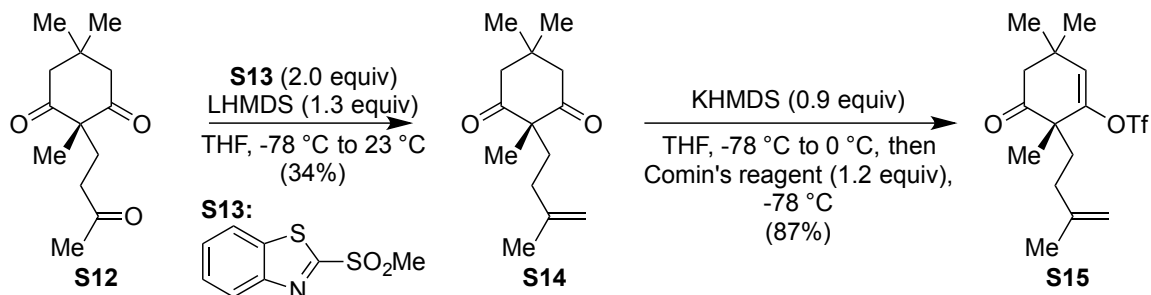

**Triflate S15.** To a solution of 2-methanesulfonylbenzothiazole (**S13**, 1.28 g, 6.00 mmol, 2.0 equiv) and 2,5,5-trimethyl-2-(3-oxobutyl)cyclohexane-1,3-dione<sup>[6]</sup> (**S12**, 0.672 g, 3.00 mmol,

1.0 equiv) in THF (30 mL) at  $-78\text{ }^{\circ}\text{C}$  was added LHMDs (3.90 mL, 1.0 M in THF, 3.90 mmol, 1.3 equiv). The resultant mixture was stirred at  $-78\text{ }^{\circ}\text{C}$  for 3 h, and then the mixture was warmed to  $23\text{ }^{\circ}\text{C}$  and stirred for an additional 1 h. Upon completion, the reaction mixture was diluted with EtOAc (20 mL), cooled to  $0\text{ }^{\circ}\text{C}$ , quenched by the addition of saturated aqueous  $\text{NH}_4\text{Cl}$  (20 mL), and warmed to  $23\text{ }^{\circ}\text{C}$ . The resultant mixture was then poured into a separatory funnel and the layers were separated. The aqueous layer was extracted with EtOAc ( $2 \times 30\text{ mL}$ ). The combined organic layers were washed with brine (30 mL) before being dried ( $\text{Na}_2\text{SO}_4$ ), filtered, and concentrated. The resultant residue was purified by flash column chromatography (silica gel, hexanes:EtOAc, 20:1 $\rightarrow$ 10:1) to provide ketone **S14** (0.226 g, 34% yield) as a yellow oil. [Note: **S12** was not stable under strongly basic conditions, thus attempts at a Wittig reaction variant gave only trace product]. **S14**:  $R_f = 0.47$  (silica gel, hexanes:EtOAc, 4:1); IR (film)  $\nu_{\text{max}}$  2955, 2871, 1727, 1693, 1650, 1456, 1373, 1331, 1254, 1070, 955, 889  $\text{cm}^{-1}$ ;  $^1\text{H}$  NMR (500 MHz,  $\text{CDCl}_3$ )  $\delta$  4.69 (s, 1 H), 4.63 (s, 1 H), 2.70 (d,  $J = 14.5\text{ Hz}$ , 2 H), 2.46 (d,  $J = 14.5\text{ Hz}$ , 2 H), 1.87–1.80 (m, 4 H), 1.67 (s, 3 H), 1.22 (s, 3 H), 1.06 (s, 3 H), 0.87 (s, 3 H);  $^{13}\text{C}$  NMR (125 MHz,  $\text{CDCl}_3$ )  $\delta$  209.8, 144.6, 110.4, 64.4, 51.4, 35.9, 32.2, 30.6, 29.4, 27.6, 22.5, 17.9; HRMS (ESI) calcd for  $\text{C}_{14}\text{H}_{23}\text{O}_2^+$  [ $\text{M} + \text{H}^+$ ] 233.1693, found 233.1699. Pressing forward, triflate **S15** was prepared as described above starting from **S14** (0.044 g, 0.20 mmol, 1.0 equiv) and using KHMDS (0.180 mL, 1.0 M in THF, 0.9 equiv) to afford triflate **S15** (0.063 g, 87% yield) as a colorless oil. **S15**:  $R_f = 0.68$  (silica gel, hexanes: EtOAc, 10:1); IR (film)  $\nu_{\text{max}}$  2966, 2937, 1724, 1673, 1416, 1245, 1214, 1142, 1001, 887, 797  $\text{cm}^{-1}$ ;  $^1\text{H}$  NMR (500 MHz,  $\text{CDCl}_3$ )  $\delta$  5.88 (s, 1 H), 4.70 (s, 1 H), 4.66 (s, 1 H), 2.52 (d,  $J = 14.0\text{ Hz}$ , 2 H), 2.37 (d,  $J = 13.9\text{ Hz}$ , 2 H), 2.04–1.98 (m, 1 H), 1.82–1.78 (m, 2 H), 1.69 (s, 3 H), 1.66–1.61 (m, 1 H), 1.30 (s, 3 H), 1.16 (s, 3 H), 1.13 (s, 3 H);  $^{13}\text{C}$  NMR (125 MHz,  $\text{CDCl}_3$ )  $\delta$  208.2, 149.1, 144.5, 126.7, 119.6, 117.0, 110.5, 51.6, 50.9, 34.0, 33.1, 33.0, 29.8, 29.3, 23.4, 22.3; HRMS (ESI) calcd for  $\text{C}_{15}\text{H}_{22}\text{O}_4\text{F}_3\text{S}^+$  [ $\text{M} + \text{H}^+$ ] 355.1185, found 355.1194.

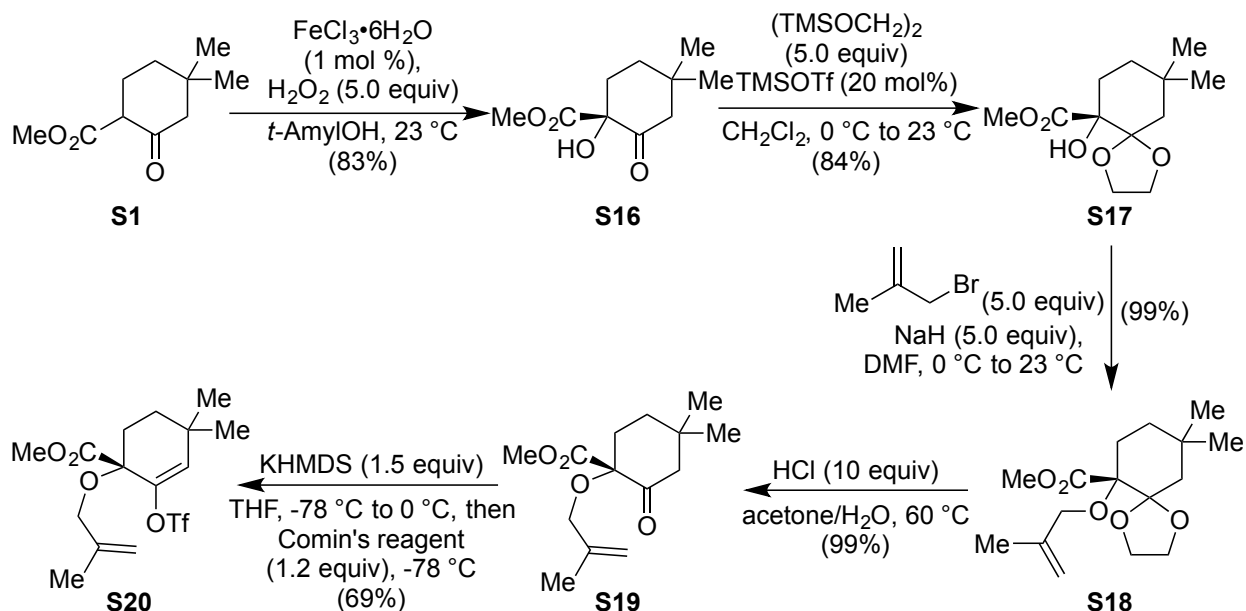

**Triflate S20.** **S16** (0.423 g, 83% yield b.r.s.m.) was prepared as a pale yellow oil following the reported procedure starting from **S1** (0.736 g, 4.00 mmol, 1.0 equiv).<sup>[7]</sup> **S16**:  $R_f = 0.26$  (silica gel, hexanes:EtOAc, 5:1); IR (film)  $\nu_{\text{max}}$  3459, 2958, 2870, 1720, 1456, 1436, 1370,

1289, 1258, 1200, 1164, 1123, 1099, 1039, 1006, 978, 796;  $^1\text{H}$  NMR (500 MHz,  $\text{CDCl}_3$ )  $\delta$  4.31 (s, 1 H), 3.79 (s, 3 H), 2.60–2.56 (m, 1 H), 2.48–2.39 (m, 2 H), 1.83–1.79 (m, 1 H), 1.63–1.60 (m, 1H), 1.08 (s, 3 H), 0.93 (s, 3 H);  $^{13}\text{C}$  NMR (125 MHz,  $\text{CDCl}_3$ )  $\delta$  207.0, 170.5, 79.9, 53.0, 51.4, 36.9, 35.1, 33.4, 30.6, 26.1; HRMS (ESI) calcd for  $\text{C}_{10}\text{H}_{15}\text{O}_3^+$  [ $\text{M} + \text{H}^+ - \text{H}_2\text{O}$ ] 183.1016, found 183.1022. Next, to a solution of **S16** (0.200 g, 1.00 mmol, 1.0 equiv) in  $\text{CH}_2\text{Cl}_2$  (10 ml) at 0 °C was added 1,2-bis(trimethylsiloxy)ethane (0.618 g, 5.00 mmol, 5.0 equiv) and TMSOTf (44.0 mg, 0.20 mmol, 0.2 equiv). The mixture was then stirred at 23 °C for 20 h. Upon completion, the reaction contents were quenched by the addition of saturated aqueous  $\text{NaHCO}_3$  (10 mL). The mixture was poured into a separatory funnel and the layers were separated. The aqueous layer was then extracted with  $\text{CH}_2\text{Cl}_2$  ( $2 \times 10$  mL). The combined organic layers were dried ( $\text{Na}_2\text{SO}_4$ ), filtered, and concentrated. The resultant residue was purified by flash column chromatography (hexanes:EtOAc, 10:1→5:1) to provide ketal **S17** (0.205 g, 84% yield) as a white solid. **S17**:  $R_f$  = 0.22 (silica gel, hexanes:EtOAc, 5:1); IR (film)  $\nu_{\text{max}}$  3505, 2952, 1732, 1449, 1388, 1264, 1217, 1168, 1074, 1043, 988, 826, 614;  $^1\text{H}$  NMR (500 MHz,  $\text{CDCl}_3$ )  $\delta$  3.94–3.89 (m, 3 H), 3.78–3.74 (m, 1 H), 3.77 (s, 3 H), 3.38 (d,  $J$  = 1.7 Hz, 1 H), 2.29–2.22 (m, 1 H), 1.78–1.74 (m, 2 H), 1.58–1.52 (m, 1 H), 1.45 (dd,  $J$  = 13.8, 1.4 Hz, 1 H), 1.32 (dtd,  $J$  = 13.6, 4.8, 1.3 Hz, 1 H), 1.04 (s, 3 H), 0.96 (s, 3 H);  $^{13}\text{C}$  NMR (125 MHz,  $\text{CDCl}_3$ )  $\delta$  174.3, 110.1, 76.9, 65.8, 64.7, 52.8, 43.7, 32.9, 32.0, 31.2, 28.7, 26.7; HRMS (ESI) calcd for  $\text{C}_{12}\text{H}_{19}\text{O}_4^+$  [ $\text{M} + \text{H}^+ - \text{H}_2\text{O}$ ] 227.1278, found 227.1281. Pressing forward, to a suspension of NaH (0.200 g, 60% dispersion in mineral oil, 5.00 mmol, 5.0 equiv) in DMF (5 ml) at 0 °C was added a solution of ketal **S17** (0.244 g, 1.00 mmol, 1.0 equiv) in DMF (5 ml). The resultant mixture was then stirred for 30 min at 0 °C before 3-bromo-2-methylpropene (0.675 g, 5.00 mmol, 5.0 equiv) was added. The reaction contents were then warmed to 23 °C and stirred at that temperature for 2 h. Upon completion, the reaction contents were cooled to 0 °C, diluted with  $\text{Et}_2\text{O}$  (10 ml), and quenched by the slow addition of  $\text{H}_2\text{O}$ . The resultant mixture was poured into a separatory funnel and the layers were separated. The aqueous layer was then extracted with  $\text{Et}_2\text{O}$  ( $2 \times 10$  mL). The combined organic layers were washed with  $\text{H}_2\text{O}$  ( $3 \times 10$  mL) and brine (10 mL) before being dried ( $\text{Na}_2\text{SO}_4$ ), filtered, and concentrated. The resultant residue was purified by flash column chromatography (silica gel, hexanes:EtOAc, 5:1) to provide ketal **S18** (0.298 g, 99% yield) as a colorless oil. **S18**:  $R_f$  = 0.28 (silica gel, hexanes:EtOAc = 5:1); IR (film)  $\nu_{\text{max}}$  2951, 2913, 1735, 1453, 1254, 1214, 1165, 1083, 1057, 900;  $^1\text{H}$  NMR (500 MHz,  $\text{CDCl}_3$ )  $\delta$  5.03 (s, 1 H), 4.85 (s, 1 H), 3.96–3.92 (m, 1 H), 3.89–3.85 (m, 2 H), 3.81–3.78 (m, 3 H), 3.75 (s, 3 H), 2.26 (ddd,  $J$  = 15.1, 13.6, 3.8 Hz, 1 H), 2.01 (dt,  $J$  = 15.2, 3.8 Hz, 1 H), 1.85 (d,  $J$  = 13.8 Hz, 1 H), 1.75 (s, 3 H), 1.40 (dd,  $J$  = 13.8, 1.7 Hz, 1 H), 1.37 (td,  $J$  = 13.5, 3.5 Hz, 1 H), 1.23 (ttt,  $J$  = 13.5, 5.6, 1.8 Hz, 1 H), 1.04 (s, 3 H), 0.93 (s, 3 H);  $^{13}\text{C}$  NMR (125 MHz,  $\text{CDCl}_3$ )  $\delta$  172.0, 141.5, 111.4, 110.0, 82.4, 67.5, 65.0, 64.9, 52.2, 43.6, 32.9, 32.6, 31.3, 26.5, 24.7, 19.7; HRMS (ESI) calcd for  $\text{C}_{16}\text{H}_{27}\text{O}_5^+$  [ $\text{M} + \text{H}^+$ ] 299.1853, found 299.1870. Next, to a solution of ketal **S18** (0.298 g, 1.00 mmol, 1.0 equiv) in acetone (15 mL) at 23 °C was added HCl (10.0 mL, 1.0 M in  $\text{H}_2\text{O}$ , 10.0 mmol, 10 equiv). The resultant solution was heated to 60 °C for 12 h. Upon completion, the reaction contents were cooled to 23 °C, poured into a separatory funnel, and the resultant layers were separated. The aqueous layer was then extracted with EtOAc ( $3 \times 10$  mL). The combined organic layers were washed with brine (10 mL) before being dried ( $\text{Na}_2\text{SO}_4$ ), filtered, and concentrated. The resultant residue was purified by flash column chromatography (silica gel, hexanes:EtOAc, 10:1) to provide ketone **S19** (0.254 g, 99% yield) as a colorless oil. **S19**:  $R_f$  = 0.30 (silica gel, hexanes:EtOAc = 10:1); IR (film)  $\nu_{\text{max}}$  2957, 2928, 2870, 1751, 1724, 1456, 1370, 1298, 1256, 1160, 1127, 1080, 1054, 899;  $^1\text{H}$  NMR (500 MHz,  $\text{CDCl}_3$ )  $\delta$  5.03 (s, 1 H),



4.89 (s, 1 H), 4.15 (d,  $J = 12.0$  Hz, 1 H), 3.79 (s, 3 H), 3.78 (d,  $J = 12.0$  Hz, 1 H), 2.54 (d,  $J = 13.2$  Hz, 1 H), 2.34 (ddd,  $J = 14.8, 5.6, 4.2$  Hz, 1 H), 2.17 (dd,  $J = 13.2, 1.6$  Hz, 1 H), 2.12 (ddd,  $J = 14.8, 11.3, 4.3$  Hz, 1 H), 1.83 (ddd,  $J = 13.9, 11.2, 4.3$  Hz, 1 H), 1.77 (s, 3 H), 1.36 (dddd,  $J = 13.8, 5.5, 4.3, 1.6$  Hz, 1 H), 1.04 (s, 3 H), 0.98 (s, 3 H);  $^{13}\text{C}$  NMR (125 MHz,  $\text{CDCl}_3$ )  $\delta$  205.8, 170.6, 141.8, 111.9, 85.4, 69.7, 52.3, 52.2, 36.5, 33.8, 31.3, 30.1, 26.7, 19.6; HRMS (ESI) calcd for  $\text{C}_{14}\text{H}_{23}\text{O}_4^+ [\text{M} + \text{H}^+]$  255.1591, found 255.1599. Pressing forward, triflate **S20** was prepared as described above starting from **S19** (0.079 g, 0.31 mmol, 1.0 equiv) to afford triflate **S20** (0.083 g, 69% yield) as a yellow oil. **S20**:  $R_f = 0.32$  (silica gel, hexanes:EtOAc, 10:1); IR (film)  $\nu_{\text{max}}$  2961, 2870, 1759, 1661, 1454, 1419, 1366, 1211, 1145, 1093, 1056, 1007, 952, 901, 811;  $^1\text{H}$  NMR (500 MHz,  $\text{CDCl}_3$ )  $\delta$  5.76 (s, 1 H), 5.03 (s, 1 H), 4.88 (s, 1 H), 4.00 (dd,  $J = 28.3, 11.6$  Hz, 2 H), 3.79 (s, 3 H), 2.25 (ddd,  $J = 13.8, 11.4, 3.4$  Hz, 1 H), 2.10 (ddd,  $J = 13.8, 6.9, 3.4$  Hz, 1 H), 1.78 (s, 3 H), 1.71 (ddd,  $J = 13.8, 11.2, 3.4$  Hz, 1 H), 1.54 (ddd,  $J = 13.8, 6.9, 3.4$  Hz, 1 H), 1.13 (s, 3 H), 1.12 (s, 3 H);  $^{13}\text{C}$  NMR (125 MHz,  $\text{CDCl}_3$ )  $\delta$  170.7, 144.6, 141.9, 123.3, 119.6, 117.0, 112.0, 78.4, 69.6, 52.6, 33.6, 32.0, 30.0, 29.1, 27.6, 19.5; HRMS (ESI) calcd for  $\text{C}_{15}\text{H}_{21}\text{O}_6\text{F}_3\text{SNa}^+ [\text{M} + \text{Na}^+]$  409.0903, found 409.0907.

## Preparation of nucleophilic salts

To a solution of corresponding acid or phenol (5.00 mmol) in anhydrous MeOH (5 mL) was added *n*-Bu<sub>4</sub>NOH (5.05 mL, 1.0 M in MeOH, 5.05 mmol, 1.01 equiv) at 23 °C, and the resultant solution was stirred at 23 °C for 1 h. Upon completion, the resultant mixture was co-evaporated with benzene under an Ar atmosphere and the residue was dried over P<sub>2</sub>O<sub>5</sub> on vacuum overnight. If the dried residue was a liquid, it was cooled to 0 °C to form a solid (>95% yield). The solid was then recrystallized from minimal EtOAc under Ar atmosphere to provide the anhydrous salt (~30–60% yield) for use in subsequent reaction. The salts can be kept stable in dry box for months. [Note: the pentafluorophenoate salt (**S39**) was unstable and should be used immediately].

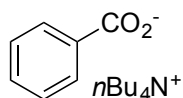

**S21**

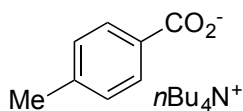

**S22**

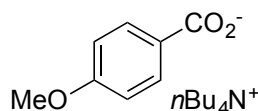

**S23**

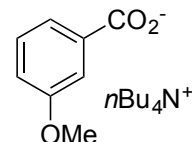

**S24**

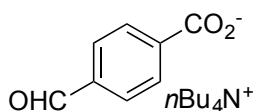

**S25**

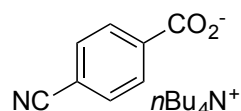

**S26**

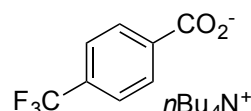

**S27**

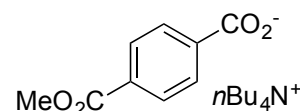

**S28**

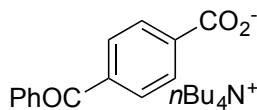

**S29**

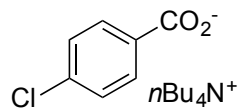

**S30**

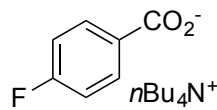

**S31**

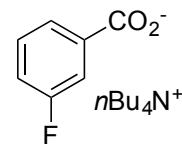

**S32**

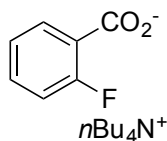

**S33**

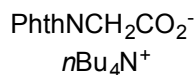

**S34**

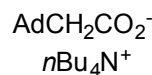

**S35**

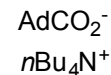

**S36**

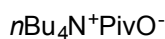

**S37**

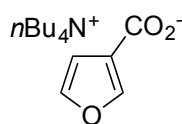

**S38**

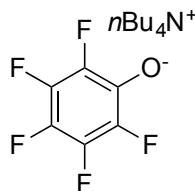

**S39**

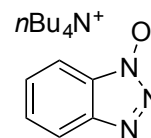

**S40**

**Tetrabutylammonium benzoate (S21).** Pale yellow solid;  $^1\text{H}$  NMR (500 MHz,  $\text{CDCl}_3$ )  $\delta$  8.10–8.08 (m, 2 H), 7.30–7.28 (m, 3 H), 3.56–2.32 (m, 8 H), 1.66–1.59 (m, 8 H), 1.40 (sx,  $J = 7.4$  Hz, 8 H), 0.96 (t,  $J = 7.3$  Hz, 12 H);  $^{13}\text{C}$  NMR (125 MHz,  $\text{CDCl}_3$ )  $\delta$  170.9, 141.4, 129.4, 128.2, 126.9, 58.5, 23.9, 19.6, 13.5.

**Tetrabutylammonium 4-methylbenzoate (S22).** Pale yellow solid;  $^1\text{H}$  NMR (500 MHz,  $\text{CDCl}_3$ )  $\delta$  7.85 (d,  $J = 8.0$  Hz, 2 H), 6.98 (d,  $J = 7.8$  Hz, 2 H), 3.04–3.00 (m, 8 H), 2.23 (s, 3 H), 1.41–1.35 (m, 8 H), 1.27–1.19 (m, 8 H), 1.07 (sx,  $J = 7.4$  Hz, 8 H), 0.83 (t,  $J = 7.3$  Hz, 12 H);  $^{13}\text{C}$  NMR (125 MHz,  $\text{CDCl}_3$ )  $\delta$  171.0, 138.3, 137.4, 129.4, 127.8, 58.0, 23.6, 21.1, 19.4, 13.5.

**Tetrabutylammonium 4-methoxybenzoate (S23).** Pale yellow solid;  $^1\text{H}$  NMR (500 MHz,  $\text{CDCl}_3$ )  $\delta$  7.87–7.84 (m, 2 H), 6.61–6.58 (m, 2 H), 3.01–2.97 (m, 8 H), 1.36–1.29 (m, 8 H), 1.16 (sx,  $J = 7.4$  Hz, 8 H), 0.74 (t,  $J = 7.3$  Hz, 12 H);  $^{13}\text{C}$  NMR (125 MHz,  $\text{CDCl}_3$ )  $\delta$  170.6, 160.0, 133.9, 130.9, 112.0, 58.3, 55.0, 23.8, 19.5, 13.5.

**Tetrabutylammonium 3-methoxybenzoate (S24).** White solid;  $^1\text{H}$  NMR (500 MHz,  $\text{CDCl}_3$ )  $\delta$  7.56–7.55 (m, 2 H), 7.09–7.06 (m, 1 H), 6.75–6.73 (m, 1 H), 3.71 (s, 3 H), 3.09–3.06 (m, 8 H), 1.46–1.39 (m, 8 H), 1.25 (sx,  $J = 7.3$  Hz, 8 H), 0.83 (t,  $J = 7.2$  Hz, 12 H);  $^{13}\text{C}$  NMR (125 MHz,  $\text{CDCl}_3$ )  $\delta$  170.9, 158.9, 142.3, 128.0, 122.0, 115.3, 113.9, 58.4, 55.2, 23.8, 19.6, 13.6.

**Tetrabutylammonium 4-formylbenzoate (S25).** White solid;  $^1\text{H}$  NMR (500 MHz,  $\text{CDCl}_3$ )  $\delta$  9.94 (s, 1 H); 8.12 (d,  $J = 8.0$  Hz, 2 H), 7.73 (d,  $J = 8.0$  Hz, 2 H), 3.20–3.17 (m, 8 H), 1.55–1.49 (m, 8 H), 1.30 (sx,  $J = 7.4$  Hz, 8 H), 0.86 (t,  $J = 7.4$  Hz, 12 H);  $^{13}\text{C}$  NMR (125 MHz,  $\text{CDCl}_3$ )  $\delta$  192.7, 170.1, 146.6, 136.3, 129.8, 129.0, 58.6, 23.9, 19.6, 13.6.

**Tetrabutylammonium 4-cyanobenzoate (S26).** Yellow solid;  $^1\text{H}$  NMR (500 MHz,  $\text{CDCl}_3$ )  $\delta$  7.98 (d,  $J = 8.4$  Hz, 2 H), 7.36 (d,  $J = 8.4$  Hz, 2 H), 3.09–3.06 (m, 8 H), 1.44–1.37 (m, 8 H), 1.18 (sx,  $J = 7.4$  Hz, 8 H), 0.74 (t,  $J = 7.3$  Hz, 12 H);  $^{13}\text{C}$  NMR (125 MHz,  $\text{CDCl}_3$ )  $\delta$  169.0, 145.6, 131.0, 129.8, 119.6, 111.2, 58.5, 23.8, 19.5, 13.5.

**Tetrabutylammonium 4-(trifluoromethyl)benzoate (S27).** Pale yellow solid;  $^1\text{H}$  NMR (500 MHz,  $\text{CDCl}_3$ )  $\delta$  8.17 (d,  $J = 7.9$  Hz, 2 H), 7.52 (d,  $J = 8.1$  Hz, 2 H), 3.32–3.30 (m, 8 H), 1.64–1.58 (m, 8 H), 1.41–1.34 (m, 8 H), 1.26 (sx,  $J = 7.4$  Hz, 8 H), 0.94 (t,  $J = 7.3$  Hz, 12 H);  $^{13}\text{C}$  NMR (125 MHz,  $\text{CDCl}_3$ )  $\delta$  169.5, 144.7, 130.0, 129.8, 129.5, 125.6, 124.0, 123.9, 58.4, 23.8, 19.5, 13.4.

**Tetrabutylammonium 4-(methoxycarbonyl)benzoate (S28).** White solid;  $^1\text{H}$  NMR (500 MHz,  $\text{CDCl}_3$ )  $\delta$  8.08 (d,  $J = 8.0$  Hz, 2 H), 7.92 (d,  $J = 8.0$  Hz, 2 H), 3.85 (s, 3 H), 3.26–3.22 (m, 8 H), 1.58–1.52 (m, 8 H), 1.34 (sx,  $J = 7.3$  Hz, 8 H), 0.90 (t,  $J = 7.3$  Hz, 12 H);  $^{13}\text{C}$  NMR (125 MHz,  $\text{CDCl}_3$ )  $\delta$  170.4, 167.5, 145.6, 129.7, 129.2, 128.6, 58.7, 51.8, 24.0, 19.7, 13.6.

**Tetrabutylammonium 4-benzoylbenzoate (S29).** Yellow solid;  $^1\text{H}$  NMR (500 MHz,  $\text{CDCl}_3$ )  $\delta$  8.05–8.03 (m, 2 H), 7.63–7.61 (m, 2 H), 7.45–7.42 (m, 1 H), 7.34–7.31 (m, 2 H), 3.14–3.11 (m, 8 H), 1.49–1.42 (m, 8 H), 1.24 (sx,  $J = 7.4$  Hz, 8 H), 0.80 (t,  $J = 7.3$  Hz, 12 H);  $^{13}\text{C}$  NMR (125 MHz,  $\text{CDCl}_3$ )  $\delta$  197.1, 170.2, 145.0, 137.8, 137.2, 132.2, 129.8, 129.2, 129.1, 128.1, 58.5, 23.8, 19.6, 13.6.

**Tetrabutylammonium 4-chlorobenzoate (S30).** Green solid;  $^1\text{H}$  NMR (500 MHz,  $\text{CDCl}_3$ )  $\delta$  7.95–7.93 (m, 2 H), 7.16–7.13 (m, 2 H), 3.15–3.12 (m, 8 H), 1.51–1.45 (m, 8 H), 1.28 (sx,  $J = 7.4$  Hz, 8 H), 0.86 (t,  $J = 7.3$  Hz, 12 H);  $^{13}\text{C}$  NMR (125 MHz,  $\text{CDCl}_3$ )  $\delta$  170.2, 139.2, 134.4, 130.9, 127.2, 58.5, 23.9, 19.6, 13.6.

**Tetrabutylammonium 4-fluorobenzoate (S31).** White solid;  $^1\text{H}$  NMR (500 MHz,  $\text{CDCl}_3$ )  $\delta$  8.00–7.97 (m, 2 H), 6.86–6.82 (m, 2 H), 3.13–3.10 (m, 8 H), 1.49–1.42 (m, 8 H), 1.27 (sx,  $J = 7.4$  Hz, 8 H), 0.85 (t,  $J = 7.3$  Hz, 12 H);  $^{13}\text{C}$  NMR (125 MHz,  $\text{CDCl}_3$ )  $\delta$  170.2, 164.3, 162.4, 131.4, 131.3, 125.2, 113.6, 113.5, 58.8, 24.1, 19.7, 13.6.

**Tetrabutylammonium 3-fluorobenzoate (S32).** White solid;  $^1\text{H}$  NMR (500 MHz,  $\text{CDCl}_3$ )  $\delta$  7.75–7.73 (m, 1 H), 7.63–7.61 (m, 1 H), 7.13–7.09 (m, 1 H), 6.86–6.83 (m, 1 H), 3.14–3.10 (m, 8 H), 1.47–1.43 (m, 8 H), 1.26–1.21 (m, 8 H), 0.84–0.80 (m, 12 H);  $^{13}\text{C}$  NMR (125 MHz,  $\text{CDCl}_3$ )  $\delta$  169.7, 163.4, 161.4, 143.9, 128.3, 125.0, 116.0, 115.8, 115.1, 115.0, 58.5, 23.9, 19.6, 13.6.

**Tetrabutylammonium 2-fluorobenzoate (S33).** White solid,  $^1\text{H}$  NMR (500 MHz,  $\text{CDCl}_3$ )  $\delta$  7.65–7.62 (m, 1 H), 7.06–7.02 (m, 1 H), 6.91–6.88 (m, 1 H), 6.82–6.78 (m, 1 H), 3.17–3.13 (m, 8 H), 1.49–1.45 (m, 8 H), 1.25 (sx,  $J = 7.4$  Hz, 8 H), 0.83 (t,  $J = 7.4$  Hz, 12 H);  $^{13}\text{C}$  NMR (125 MHz,  $\text{CDCl}_3$ )  $\delta$  169.0, 161.2, 159.2, 131.2, 131.1, 128.5, 123.0, 115.4, 115.2, 58.4, 23.9, 19.6, 13.6.

**Tetrabutylammonium *N*-Phthaloylglycinate (S34).** Pale yellow solid;  $^1\text{H}$  NMR (500 MHz,  $\text{CDCl}_3$ )  $\delta$  7.77 (dd,  $J = 5.4, 3.0$  Hz, 2 H), 7.62 (dd,  $J = 5.4, 3.0$  Hz, 2 H), 4.21 (s, 2 H), 3.32–3.28 (m, 8 H), 1.66–1.60 (m, 8 H), 1.40 (sx,  $J = 7.4$  Hz, 8 H), 0.97 (t,  $J = 7.3$  Hz, 12 H);  $^{13}\text{C}$  NMR (125 MHz,  $\text{CDCl}_3$ )  $\delta$  169.7, 168.6, 133.1, 122.7, 58.6, 42.5, 24.0, 19.7, 13.6.

**Tetrabutylammonium 2-(adamantan-1-yl)acetate (S35).** Pale yellow solid;  $^1\text{H}$  NMR (500 MHz,  $\text{CDCl}_3$ )  $\delta$  3.30–3.26 (m, 8 H), 1.87 (s, 2 H), 1.81 (s, 3 H), 1.63 (d,  $J = 2.2$  Hz, 6 H), 1.59–1.53 (m, 14 H), 1.34 (sx,  $J = 7.4$  Hz, 8 H), 0.90 (t,  $J = 7.3$  Hz, 12 H);  $^{13}\text{C}$  NMR (125 MHz,  $\text{CDCl}_3$ )  $\delta$  176.9, 58.7, 55.0, 43.0, 37.3, 32.1, 29.0, 24.1, 19.7, 13.7.

**Tetrabutylammonium adamantane-1-carboxylate (S36).** Pale yellow solid;  $^1\text{H}$  NMR (500 MHz,  $\text{CDCl}_3$ )  $\delta$  3.28–3.26 (m, 8 H), 1.87–1.84 (m, 9 H), 1.63–1.55 (m, 14 H), 1.37 (sx,  $J = 7.4$  Hz, 8 H), 0.94 (t,  $J = 7.3$  Hz, 12 H);  $^{13}\text{C}$  NMR (125 MHz,  $\text{CDCl}_3$ )  $\delta$  183.2, 8.7, 49.8, 41.8, 40.7, 37.4, 29.0, 24.1, 19.7, 13.7.

**Tetrabutylammonium pivalate (S37).** Pale yellow solid;  $^1\text{H}$  NMR (500 MHz,  $\text{CDCl}_3$ )  $\delta$  3.24–3.20 (m, 8 H), 1.57–1.51 (m, 8 H), 1.33 (sx,  $J = 7.4$  Hz, 8 H), 1.04 (s, 9 H), 0.89 (t,  $J = 7.4$  Hz, 12 H);  $^{13}\text{C}$  NMR (125 MHz,  $\text{CDCl}_3$ )  $\delta$  183.4, 58.6, 39.5, 28.9, 24.0, 19.7, 13.7.

**Tetrabutylammonium furan-3-carboxylate (S38).** Brown solid;  $^1\text{H}$  NMR (500 MHz,  $\text{CDCl}_3$ )  $\delta$  7.63–7.62 (m, 1 H), 7.10 (t,  $J = 1.6$  Hz, 1 H), 6.53–6.52 (m, 1 H), 3.09–3.06 (m, 8 H), 1.45–1.38 (m, 8 H), 1.22 (sx,  $J = 7.4$  Hz, 8 H), 0.79 (t,  $J = 7.4$  Hz, 12 H);  $^{13}\text{C}$  NMR (125 MHz,  $\text{CDCl}_3$ )  $\delta$  179.8, 144.5, 141.5, 128.4, 111.6, 58.4, 23.8, 19.5, 13.5.

**Tetrabutylammonium pentafluorophenonate (S39).** Pale yellow solid,  $^1\text{H}$  NMR (500 MHz,  $\text{CDCl}_3$ )  $\delta$  3.13–3.09 (m, 8 H), 1.53–1.46 (m, 8 H), 1.28 (sx,  $J = 7.4$  Hz, 8 H), 0.87 (t,  $J =$

7.4 Hz, 12 H);  $^{13}\text{C}$  NMR (125 MHz,  $\text{CDCl}_3$ )  $\delta$  147.0, 142.1, 140.3, 139.7, 137.8, 125.1, 58.4, 23.6, 19.4, 13.3.

**Tetrabutylammonium 1H-benzo[d][1,2,3]triazol-1-olate (S40).** Brown solid,  $^1\text{H}$  NMR (500 MHz,  $\text{CDCl}_3$ )  $\delta$  7.67–7.63 (m, 2 H), 7.07–7.01 (m, 2 H), 3.20–3.17 (m, 8 H), 1.55–1.49 (m, 8 H), 1.31 (sx,  $J = 7.4$  Hz, 8 H), 0.89 (t,  $J = 7.3$  Hz, 12 H);  $^{13}\text{C}$  NMR (125 MHz,  $\text{CDCl}_3$ )  $\delta$  143.8, 127.8, 122.2, 121.1, 118.0, 112.4, 58.5, 23.8, 19.6, 13.6.

### General procedure for the Pd-based cyclization

To a flame-dried seal tube was added  $\text{Pd}(\text{OAc})_2$  (2.2 mg, 0.010 mmol, 0.1 equiv), *t*-BuMephos (4.7 mg, 0.015 mmol, 0.15 equiv), and the desired tetrabutylammonium salt (0.30 mmol, 3.0 equiv). Next, a solution of the desired vinyl triflate (0.10 mmol, 1.0 equiv) in toluene (1 mL) was added at 23 °C. The resultant mixture was then stirred at 90 °C until palladium black completely crashed out, typically after 5 h. Upon completion, the reaction mixture was cooled to 23 °C and filtered through a pad of silica gel (EtOAc). The filtrate was concentrated, and the resultant residue was purified by flash column chromatography (silica gel, hexanes:EtOAc) to provide the desired oxygenated product in the amount and form delineated below.

**Product Acetate 18.** Pale yellow oil, 28.2 mg, 96% yield;  $R_f = 0.26$  (silica gel, hexanes:EtOAc, 10:1); IR (film)  $\nu_{\text{max}}$  2955, 2930, 2863, 1739, 1729, 1597, 1564, 1448, 1385, 1274, 1218, 1150, 1034  $\text{cm}^{-1}$ ;  $^1\text{H}$  NMR (500 MHz,  $\text{CDCl}_3$ )  $\delta$  5.27 (s, 1 H), 4.00 (dd,  $J = 27.2, 10.5$  Hz, 2 H), 3.65 (s, 3 H), 2.26–2.22 (m, 1 H), 2.20–2.17 (m, 1 H), 2.06 (s, 3 H), 1.56–1.49 (m, 2 H), 1.47–1.40 (m, 2 H), 1.37–1.28 (m, 2 H), 1.09 (s, 3 H), 0.99 (s, 3 H), 0.92 (s, 3 H);  $^{13}\text{C}$  NMR (125 MHz,  $\text{CDCl}_3$ )  $\delta$  176.7, 144.1, 133.2, 72.4, 55.5, 51.8, 44.0, 35.8, 35.4, 32.5, 31.8, 30.5, 29.7, 29.4, 28.2, 27.4, 26.1, 21.0; HRMS (ESI) calcd for  $\text{C}_{17}\text{H}_{27}\text{O}_4^+$  [ $\text{M} + \text{H}^+$ ] 295.1904, found 295.1907.

**Product Benzolate 19.** Colorless oil, 28.4 mg, 80% yield;  $R_f = 0.26$  (silica gel, hexanes:EtOAc, 10:1); IR (film)  $\nu_{\text{max}}$  2955, 2864, 1722, 1451, 1362, 1274, 1205, 1176, 1151, 1114, 1070, 1026, 961, 711;  $^1\text{H}$  NMR (500 MHz,  $\text{CDCl}_3$ )  $\delta$  8.07–8.05 (m, 2 H), 7.56 (tt,  $J = 7.4, 1.3$  Hz, 1 H), 7.46–7.43 (m, 2 H), 5.36 (s, 1 H), 4.25 (dd,  $J = 16.5, 10.5$  Hz, 2 H), 3.65 (s, 3 H), 2.30–2.27 (m, 1 H), 2.23–2.20 (m, 1 H), 1.71–1.58 (m, 2 H), 1.51–1.45 (m, 2 H), 1.40–1.25 (m, 2 H), 1.20 (s, 3 H), 1.00 (s, 3 H), 0.94 (s, 3 H);  $^{13}\text{C}$  NMR (125 MHz,  $\text{CDCl}_3$ )  $\delta$  176.8, 166.7, 144.0, 133.4, 132.7, 130.7, 129.6, 128.3, 72.7, 55.5, 51.9, 44.4, 35.8, 35.6, 34.8, 32.6, 31.9, 30.5, 29.4, 26.2; HRMS (ESI) calcd for  $\text{C}_{22}\text{H}_{28}\text{O}_4\text{Na}^+$  [ $\text{M} + \text{Na}^+$ ] 379.1880, found 379.1886.

**Product 4-Me 20.** White oil, 29.2 mg, 79% yield;  $R_f = 0.27$  (silica gel, hexanes:EtOAc, 10:1); IR (film)  $\nu_{\text{max}}$  2954, 2864, 1720, 1612, 1458, 1380, 1362, 1273, 1206, 1177, 1151, 1120, 1020, 961, 914, 841;  $^1\text{H}$  NMR (500 MHz,  $\text{CDCl}_3$ )  $\delta$  7.94 (d,  $J = 8.2$  Hz, 2 H), 7.24 (d,  $J = 8.1$  Hz, 2 H), 5.34 (s, 1 H), 4.22 (dd,  $J = 18.6, 10.6$  Hz, 2 H), 3.65 (s, 3 H), 2.41 (s, 3 H), 2.30–2.26 (m, 1 H), 2.22–2.19 (m, 1 H), 1.70–1.57 (m, 2 H), 1.49–1.44 (m, 2 H), 1.40–1.27 (m, 2 H), 1.19 (s, 3 H), 1.00 (s, 3 H), 0.94 (s, 3 H);  $^{13}\text{C}$  NMR (125 MHz,  $\text{CDCl}_3$ )  $\delta$  176.8, 166.8, 144.1, 143.3, 133.3, 129.6, 129.0, 128.0, 72.5, 55.5, 51.9, 44.4, 35.8, 35.6, 34.8, 32.6, 31.9, 30.5, 29.4, 26.2, 21.6; HRMS (ESI) calcd for  $\text{C}_{23}\text{H}_{31}\text{O}_4^+$  [ $\text{M} + \text{H}^+$ ] 371.2217, found 371.2226.

**Product 4-OMe 21.** Pale yellow oil, 14.3 mg, 37% yield;  $R_f = 0.25$  (silica gel, hexanes:EtOAc, 10:1); IR (film)  $\nu_{\max}$  2955, 2864, 1716, 1607, 1511, 1459, 1363, 1300, 1256, 1205, 1167, 1102, 1031, 847, 770  $\text{cm}^{-1}$ ;  $^1\text{H}$  NMR (500 MHz,  $\text{CDCl}_3$ )  $\delta$  8.01 (d,  $J = 8.8$  Hz, 2 H), 6.92 (d,  $J = 8.8$  Hz, 2 H), 5.35 (s, 1 H), 4.21 (dd,  $J = 17.8, 10.5$  Hz, 2 H), 3.86 (s, 3 H), 3.65 (s, 3 H), 2.30–2.26 (m, 1 H), 2.22–2.19 (m, 1 H), 1.70–1.57 (m, 2 H), 1.50–1.44 (m, 2 H), 1.40–1.27 (m, 2 H), 1.19 (s, 3 H), 1.00 (s, 3 H), 0.94 (s, 3 H);  $^{13}\text{C}$  NMR (125 MHz,  $\text{CDCl}_3$ )  $\delta$  176.8, 166.4, 163.2, 144.1, 133.3, 131.5, 123.2, 113.6, 72.4, 55.5, 55.4, 51.8, 44.4, 35.8, 35.6, 34.8, 32.6, 31.9, 30.5, 29.4, 26.2; HRMS (ESI) calcd for  $\text{C}_{23}\text{H}_{31}\text{O}_5^+ [\text{M} + \text{H}^+]$  387.2166, found 387.2179.

**Product 3-OMe 22.** Pale yellow oil, 23.2 mg, 60% yield;  $R_f = 0.44$  (silica gel, hexanes:EtOAc, 10:1); IR (film)  $\nu_{\max}$  2955, 2864, 2838, 1721, 1587, 1457, 1321, 1278, 1151, 1104, 1046, 977, 756  $\text{cm}^{-1}$ ;  $^1\text{H}$  NMR (500 MHz,  $\text{CDCl}_3$ )  $\delta$  7.65 (dt,  $J = 7.7, 1.0$  Hz, 1 H), 7.58 (dd,  $J = 2.6, 1.5$  Hz, 1 H), 7.35 (t,  $J = 7.9$  Hz), 7.10 (ddd,  $J = 8.2, 2.6, 0.8$  Hz, 1 H), 5.36 (s, 1 H), 4.24 (dd,  $J = 19.1, 10.5$  Hz, 2 H), 3.86 (s, 3 H), 3.65 (s, 3 H), 2.30–2.26 (m, 1 H), 2.23–2.20 (m, 1 H), 1.70–1.58 (m, 2 H), 1.51–1.44 (m, 2 H), 1.40–1.29 (m, 2 H), 1.19 (s, 3 H), 1.00 (s, 3 H), 0.94 (s, 3 H);  $^{13}\text{C}$  NMR (125 MHz,  $\text{CDCl}_3$ )  $\delta$  176.7, 166.5, 159.6, 144.0, 133.4, 132.0, 129.3, 121.2, 119.2, 114.2, 72.8, 55.5, 55.4, 51.9, 44.4, 35.8, 35.6, 34.8, 32.6, 31.9, 30.5, 29.4, 26.2; HRMS (ESI) calcd for  $\text{C}_{23}\text{H}_{31}\text{O}_5^+ [\text{M} + \text{H}^+]$  387.2166, found 387.2173.

**Product 4-CHO 23.** Colorless oil, 34.1 mg, 89% yield;  $R_f = 0.28$  (silica gel, hexanes:EtOAc, 10:1); IR (film)  $\nu_{\max}$  2955, 2864, 1723, 1709, 1459, 1275, 1202, 1116, 1016, 759  $\text{cm}^{-1}$ ;  $^1\text{H}$  NMR (500 MHz,  $\text{CDCl}_3$ )  $\delta$  10.1 (s, 1 H), 8.21 (d,  $J = 8.2$  Hz, 2 H), 7.96 (d,  $J = 8.3$  Hz, 2 H), 5.36 (s, 1 H), 4.28 (dd,  $J = 12.8, 10.6$  Hz, 2 H), 3.65 (s, 3 H), 2.31–2.27 (m, 1 H), 2.23–2.20 (m, 1 H), 1.68–1.59 (m, 2 H), 1.52–1.45 (m, 2 H), 1.40–1.25 (m, 2 H), 1.21 (s, 3 H), 0.99 (s, 3 H), 0.94 (s, 3 H);  $^{13}\text{C}$  NMR (125 MHz,  $\text{CDCl}_3$ )  $\delta$  191.7, 176.6, 165.6, 143.9, 139.1, 135.7, 133.5, 130.1, 129.5, 73.2, 55.6, 51.9, 44.3, 35.8, 35.5, 34.7, 32.6, 31.8, 30.5, 29.3, 26.2; HRMS (ESI) calcd for  $\text{C}_{23}\text{H}_{29}\text{O}_5^+ [\text{M} + \text{H}^+]$  385.2010, found 385.2009.

**Product 4-CN 24.** Yellow oil, 29.7 mg, 78% yield;  $R_f = 0.19$  (silica gel, hexanes:EtOAc, 10:1); IR (film)  $\nu_{\max}$  2955, 2864, 2231, 1724, 1458, 1275, 1206, 1152, 1118, 1018, 956, 861, 767  $\text{cm}^{-1}$ ;  $^1\text{H}$  NMR (500 MHz,  $\text{CDCl}_3$ )  $\delta$  8.15–8.14 (m, 2 H), 7.76–7.74 (m, 2 H), 5.34 (s, 1 H), 4.28 (dd,  $J = 12.0, 10.6$  Hz, 2 H), 3.65 (s, 3 H), 2.30–2.27 (m, 1 H), 2.23–2.20 (m, 1 H), 1.70–1.57 (m, 2 H), 1.52–1.45 (m, 2 H), 1.40–1.25 (m, 2 H), 1.19 (s, 3 H), 0.99 (s, 3 H), 0.94 (s, 3 H);  $^{13}\text{C}$  NMR (125 MHz,  $\text{CDCl}_3$ )  $\delta$  176.6, 165.0, 143.8, 134.5, 133.6, 132.2, 130.0, 118.0, 116.3, 73.4, 55.6, 51.9, 44.3, 35.8, 35.5, 34.7, 32.6, 31.8, 30.5, 29.3, 26.2; HRMS (ESI) calcd for  $\text{C}_{23}\text{H}_{28}\text{O}_4\text{N}^+ [\text{M} + \text{H}^+]$  382.2013, found 382.2017.

**Product 4-CF<sub>3</sub> 25.** Colorless oil, 41.1 mg, 97% yield;  $R_f = 0.50$  (silica gel, hexanes:EtOAc, 10:1); IR (film)  $\nu_{\max}$  2956, 2865, 1726, 1412, 1357, 1281, 1132, 1066, 1018, 862  $\text{cm}^{-1}$ ;  $^1\text{H}$  NMR (500 MHz,  $\text{CDCl}_3$ )  $\delta$  8.16 (d,  $J = 8.1$  Hz, 2 H), 7.71 (d,  $J = 8.2$  Hz, 2 H), 5.36 (s, 1 H), 4.28 (dd,  $J = 15.2$  Hz, 10.6 Hz, 2 H), 3.66 (s, 3 H), 2.31–2.27 (m, 1 H), 2.23–2.20 (m, 1 H), 1.71–1.58 (m, 2 H), 1.52–1.46 (m, 2 H), 1.37–1.25 (m, 2 H), 1.20 (s, 3 H), 1.00 (s, 3 H), 0.94 (s, 3 H);  $^{13}\text{C}$  NMR (125 MHz,  $\text{CDCl}_3$ )  $\delta$  176.6, 165.4, 143.9, 134.2, 133.9, 133.5, 139.9, 125.39, 125.36, 73.1, 55.6, 51.9, 44.3, 35.8, 35.5, 34.7, 32.6, 30.5, 29.3, 26.2; HRMS (ESI) calcd for  $\text{C}_{23}\text{H}_{28}\text{O}_4\text{F}_3^+ [\text{M} + \text{H}^+]$  425.1934, found 425.1942.

**Product 4-COOMe 26.** Yellow solid, 30.6 mg, 74% yield;  $R_f = 0.37$  (silica gel, hexanes:EtOAc, 10:1); IR (film)  $\nu_{\max}$  2954, 2864, 1724, 1458, 1272, 1117, 1019, 731  $\text{cm}^{-1}$ ;  $^1\text{H}$

NMR (500 MHz, CDCl<sub>3</sub>)  $\delta$  8.10 (s, 4 H), 5.35 (s, 1 H), 4.26 (dd,  $J = 13.7, 10.5$  Hz, 2 H), 3.94 (s, 3 H), 3.64 (s, 3 H), 2.30–2.26 (m, 1 H), 2.22–2.19 (m, 1 H), 1.70–1.58 (m, 2 H), 1.51–1.48 (m, 2 H), 1.39–1.24 (m, 2 H), 1.20 (s, 3 H), 0.98 (s, 3 H), 0.93 (s, 3 H); <sup>13</sup>C NMR (125 MHz, CDCl<sub>3</sub>)  $\delta$  176.6, 166.3, 165.8, 143.9, 134.5, 133.8, 133.5, 129.54, 129.51, 73.1, 55.6, 52.4, 52.0, 44.3, 35.8, 35.5, 34.7, 32.6, 31.8, 30.5, 29.3, 26.2; HRMS (ESI) calcd for C<sub>24</sub>H<sub>31</sub>O<sub>6</sub><sup>+</sup> [M + H<sup>+</sup>] 415.2115, found 415.2113.

**Product 4-COPh 27.** Yellow oil, 42.3 mg, 92% yield;  $R_f = 0.37$  (silica gel, hexanes:EtOAc, 10:1); IR (film)  $\nu_{\max}$  2955, 2864, 1710, 1663, 1449, 1297, 1206, 1116, 926, 714 cm<sup>-1</sup>; <sup>1</sup>H NMR (500 MHz, CDCl<sub>3</sub>)  $\delta$  8.17–8.15 (m, 2 H), 7.85–7.84 (m, 2 H), 7.81–7.79 (m, 2 H), 7.63–7.60 (m, 1 H), 7.51–7.48 (m, 2 H), 5.37 (s, 1 H), 4.29 (dd,  $J = 14.7, 10.5$  Hz, 2 H), 3.66 (s, 3 H), 2.31–2.27 (m, 1 H), 2.23–2.20 (m, 1 H), 1.71–1.59 (m, 2 H), 1.52–1.46 (m, 2 H), 1.40–1.29 (m, 2 H), 1.22 (s, 3 H), 1.00 (s, 3 H), 0.94 (s, 3 H); <sup>13</sup>C NMR (125 MHz, CDCl<sub>3</sub>)  $\delta$  176.7, 165.9, 143.9, 141.2, 137.0, 133.8, 133.5, 132.9, 130.1, 129.8, 129.4, 128.5, 73.1, 55.6, 51.9, 44.4, 35.8, 35.4, 34.7, 32.2, 31.8, 30.5, 29.4, 26.2; HRMS (ESI) calcd for C<sub>29</sub>H<sub>32</sub>O<sub>5</sub>Na<sup>+</sup> [M + Na<sup>+</sup>] 483.2142, found 483.2146.

**Product 4-Cl 28.** Yellow oil, 27.4 mg, 70% yield;  $R_f = 0.54$  (silica gel, hexanes:EtOAc, 10:1); IR (film)  $\nu_{\max}$  2956, 2864, 124, 1595, 1488, 1459, 1400, 1381, 1363, 1272, 1205, 1151, 1116, 1015, 960, 850, 760 cm<sup>-1</sup>; <sup>1</sup>H NMR (500 MHz, CDCl<sub>3</sub>)  $\delta$  7.98 (d,  $J = 8.5$  Hz, 2 H), 7.41 (d,  $J = 8.5$  Hz, 2 H), 5.34 (s, 1 H), 4.24 (dd,  $J = 14.1, 10.6$  Hz, 2 H), 3.65 (s, 3 H), 2.30–2.26 (m, 1 H), 2.22–2.19 (m, 1 H), 1.69–1.58 (m, 2 H), 1.51–1.44 (m, 2 H), 1.40–1.28 (m, 2 H), 1.19 (s, 3 H), 0.99 (s, 3 H), 0.93 (s, 3 H); <sup>13</sup>C NMR (125 MHz, CDCl<sub>3</sub>)  $\delta$  176.6, 165.8, 144.0, 139.2, 133.4, 130.9, 129.6, 129.2, 128.7, 128.3, 72.8, 55.5, 51.9, 44.3, 35.8, 35.5, 34.7, 32.6, 31.8, 30.5, 29.3, 26.2; HRMS (ESI) calcd for C<sub>22</sub>H<sub>28</sub>O<sub>4</sub>Cl<sup>+</sup> [M + H<sup>+</sup>] 391.1671, found 391.1675.

**Product 4-F 29.** Pale yellow oil, 33.7 mg, 90% yield;  $R_f = 0.51$  (silica gel, hexanes:EtOAc, 10:1); IR (film)  $\nu_{\max}$  2955, 2864, 1724, 1604, 1508, 1458, 1274, 1152, 1116, 854, 767 cm<sup>-1</sup>; <sup>1</sup>H NMR (500 MHz, CDCl<sub>3</sub>)  $\delta$  8.08–8.05 (m, 2 H), 7.13–7.09 (m, 2 H), 5.34 (s, 1 H), 4.23 (dd,  $J = 13.7, 10.6$  Hz, 2 H), 3.65 (s, 3 H), 2.30–2.26 (m, 1 H), 2.22–2.19 (m, 1 H), 1.70–1.57 (m, 2 H), 1.51–1.44 (m, 2 H), 1.40–1.25 (m, 2 H), 1.19 (s, 3 H), 0.99 (s, 3 H), 0.94 (s, 3 H); <sup>13</sup>C NMR (125 MHz, CDCl<sub>3</sub>)  $\delta$  176.7, 166.7, 165.7, 164.7, 144.0, 133.4, 132.1, 132.0, 127.0, 126.9, 115.5, 115.3, 72.8, 55.5, 51.9, 44.4, 35.8, 35.5, 34.7, 32.6, 31.8, 30.5, 29.4, 26.2; HRMS (ESI) calcd for C<sub>22</sub>H<sub>28</sub>O<sub>4</sub>F<sup>+</sup> [M + H<sup>+</sup>] 375.1966, found 375.1971.

**Product 3-F 30.** Colorless oil, 29.9 mg, 80% yield;  $R_f = 0.49$  (silica gel, hexanes:EtOAc, 10:1); IR (film)  $\nu_{\max}$  2957, 2864, 1724, 1596, 1561, 1448, 1388, 1276, 1261, 1204, 1151, 1094, 858 cm<sup>-1</sup>; <sup>1</sup>H NMR (500 MHz, CDCl<sub>3</sub>)  $\delta$  7.85–7.84 (m, 1 H), 7.74–7.71 (m, 1 H), 7.44–7.40 (m, 1 H), 7.27–7.23 (m, 1 H), 5.35 (s, 1 H), 4.25 (dd,  $J = 15.8, 10.5$  Hz, 2 H), 3.65 (s, 3 H), 2.30–2.26 (m, 1 H), 2.23–2.20 (m, 1 H), 1.70–1.58 (m, 2 H), 1.51–1.45 (m, 2 H), 1.40–1.25 (m, 2 H), 1.19 (s, 3 H), 1.00 (s, 3 H), 0.94 (s, 3 H); <sup>13</sup>C NMR (125 MHz, CDCl<sub>3</sub>)  $\delta$  176.7, 165.5, 161.6, 143.9, 133.5, 130.0, 129.9, 125.3, 125.2, 119.9, 119.7, 116.5, 116.3, 73.0, 55.5, 51.9, 44.3, 35.8, 35.5, 34.7, 32.6, 31.8, 30.5, 29.3, 26.2; HRMS (ESI) calcd for C<sub>22</sub>H<sub>28</sub>O<sub>4</sub>F<sup>+</sup> [M + H<sup>+</sup>] 375.1966, found 375.1971.

**Product 2-F 31.** Colorless oil, 32.6 mg, 87% yield;  $R_f = 0.40$  (silica gel, hexanes:EtOAc, 10:1); IR (film)  $\nu_{\max}$  2955, 2864, 1724, 1613, 1486, 1458, 1363, 1297, 1153, 1128, 1033, 960, 758 cm<sup>-1</sup>; <sup>1</sup>H NMR (500 MHz, CDCl<sub>3</sub>)  $\delta$  7.95 (td,  $J = 7.6, 1.8$  Hz, 1 H), 7.52–7.48 (m, 1 H), 7.19

(dt,  $J = 7.8, 0.5$  Hz, 1 H), 7.12 (dd,  $J = 10.6, 8.7$  Hz, 1 H), 5.36 (s, 1 H), 4.25 (dd,  $J = 12.8, 10.6$  Hz, 2 H), 3.64 (s, 3 H), 2.28–2.24 (m, 1 H), 2.22–2.19 (m, 1 H), 1.70–1.57 (m, 2 H), 1.50–1.43 (m, 2 H), 1.39–1.24 (m, 2 H), 1.19 (s, 3 H), 0.98 (s, 3 H), 0.93 (s, 3 H);  $^{13}\text{C}$  NMR (125 MHz,  $\text{CDCl}_3$ )  $\delta$  176.8, 164.7, 163.0, 160.9, 143.9, 134.3, 134.2, 133.3, 132.2, 123.9, 123.8, 117.0, 116.8, 73.2, 55.6, 51.9, 44.2, 35.8, 35.6, 34.8, 32.6, 31.8, 30.5, 29.4, 26.2; HRMS (ESI) calcd for  $\text{C}_{22}\text{H}_{28}\text{O}_4\text{F}^+$  [ $\text{M} + \text{H}^+$ ] 375.1966, found 375.1959.

**Product glycine 32.** Colorless oil, 29.8 mg, 68% yield;  $R_f = 0.16$  (silica gel, hexanes:EtOAc, 5:1); IR (film)  $\nu_{\text{max}}$  2925, 2857, 1778, 1749, 1724, 1457, 1417, 1388, 1206, 955, 731, 714;  $^1\text{H}$  NMR (500 MHz,  $\text{CDCl}_3$ )  $\delta$  7.89 (dd,  $J = 5.5, 3.0$  Hz, 2 H), 7.75 (dd,  $J = 5.4, 3.1$  Hz, 2 H), 5.20 (s, 1 H), 4.46 (d,  $J = 4.1$  Hz, 2 H), 4.09 (s, 1 H), 3.64 (s, 3 H), 2.20–2.16 (m, 2 H), 1.52–1.47 (m, 1H), 1.45–1.37 (m, 3 H), 1.34–1.29 (m, 2 H), 1.04 (s, 3 H), 0.96 (s, 3 H), 0.87 (s, 3 H);  $^{13}\text{C}$  NMR (125 MHz,  $\text{CDCl}_3$ )  $\delta$  176.6, 167.4, 167.2, 143.8, 134.2, 133.4, 132.1, 123.6, 73.4, 55.5, 51.9, 44.0, 39.0, 35.7, 35.3, 34.8, 32.5, 31.8, 30.4, 29.7, 29.3, 25.9; HRMS (ESI) calcd for  $\text{C}_{25}\text{H}_{29}\text{O}_6\text{NNa}^+$  [ $\text{M} + \text{Na}^+$ ] 462.1887, found 462.1889.

**Product  $\text{CH}_2\text{Ad}$  33.** Colorless oil, 37.3 mg, 87% yield;  $R_f = 0.34$  (silica gel, hexanes:EtOAc, 10:1); IR (film)  $\nu_{\text{max}}$  2953, 2904, 2848, 1730, 1457, 1256, 1201, 1136, 1101, 1003  $\text{cm}^{-1}$ ;  $^1\text{H}$  NMR (500 MHz,  $\text{CDCl}_3$ )  $\delta$  5.28 (s, 1 H), 3.96 (dd,  $J = 15.3, 10.6$  Hz, 2 H), 3.65 (s, 3 H), 2.26–2.22 (m, 1 H), 2.19–2.17 (m, 1 H), 2.08 (s, 2 H), 1.96 (s, 3 H), 1.71–1.62 (m, 12 H), 1.55–1.49 (m, 2 H), 1.47–1.39 (m, 2 H), 1.37–1.27 (m, 2 H), 1.10 (s, 3 H), 0.98 (s, 3 H), 0.92 (s, 3 H);  $^{13}\text{C}$  NMR (125 MHz,  $\text{CDCl}_3$ )  $\delta$  176.7, 172.1, 144.2, 133.1, 72.1, 55.5, 51.8, 49.3, 43.9, 42.5, 36.8, 35.8, 35.7, 34.8, 32.7, 32.6, 31.9, 30.5, 29.4; HRMS (ESI) calcd for  $\text{C}_{27}\text{H}_{41}\text{O}_4^+$  [ $\text{M} + \text{H}^+$ ] 429.2999, found 429.2989.

**Product Ad 34.** Colorless oil, 38.1 mg, 92% yield;  $R_f = 0.65$  (silica gel, hexanes:EtOAc, 10:1); IR (film)  $\nu_{\text{max}}$  2907, 2854, 1727, 1453, 1234, 1150, 1078, 991, 963, 738  $\text{cm}^{-1}$ ;  $^1\text{H}$  NMR (500 MHz,  $\text{CDCl}_3$ )  $\delta$  5.30 (s, 1 H), 3.93 (dd,  $J = 12.6, 10.6$  Hz, 2 H), 3.64 (s, 3 H), 2.26–2.22 (m, 1 H), 2.19–2.16 (m, 1 H), 2.01 (s, 3 H), 1.91–1.90 (m, 6 H), 1.74–1.66 (m, 6 H), 1.54–1.47 (m, 2 H), 1.45–1.38 (m, 2 H), 1.37–1.24 (m, 2 H), 1.10 (s, 3 H), 0.99 (s, 3 H), 0.92 (s, 3 H);  $^{13}\text{C}$  NMR (125 MHz,  $\text{CDCl}_3$ )  $\delta$  177.7, 176.8, 144.0, 133.2, 71.8, 55.4, 51.9, 44.2, 40.9, 39.0, 36.6, 35.8, 35.5, 34.7, 32.6, 31.8, 30.6, 29.4, 28.0, 26.0; HRMS calcd for  $\text{C}_{26}\text{H}_{39}\text{O}_4^+$  [ $\text{M} + \text{H}^+$ ] 415.2843, found 415.2847.

**Product pivalate 35.** Pale yellow oil, 25.5 mg, 76% yield;  $R_f = 0.37$  (silica gel, hexanes:EtOAc, 10:1); IR (film)  $\nu_{\text{max}}$  2957, 2866, 1728, 1597, 1563, 1481, 1448, 1396, 1286, 1217, 1150, 858, 798  $\text{cm}^{-1}$ ;  $^1\text{H}$  NMR (500 MHz,  $\text{CDCl}_3$ )  $\delta$  5.29 (s, 1 H), 3.94 (dd,  $J = 12.2, 10.5$  Hz, 2 H), 3.64 (s, 3 H), 2.25–2.22 (m, 1 H), 2.19–2.16 (m, 1 H), 1.54–1.48 (m, 2 H), 1.46–1.39 (m, 2 H), 1.37–1.26 (m, 2 H), 1.20 (s, 9 H), 1.10 (s, 3 H), 0.98 (s, 3 H), 0.91 (s, 3 H);  $^{13}\text{C}$  NMR (125 MHz,  $\text{CDCl}_3$ )  $\delta$  178.6, 176.8, 144.0, 133.2, 76.8, 72.1, 55.5, 51.9, 44.2, 35.7, 35.5, 34.7, 32.6, 31.8, 30.5, 29.4, 27.3, 26.0; HRMS (ESI) calcd for  $\text{C}_{20}\text{H}_{33}\text{O}_4^+$  [ $\text{M} + \text{H}^+$ ] 337.2373, found 337.2377.

**Product furan 36.** Yellow oil, 20.6 mg, 60% yield;  $R_f = 0.32$  (silica gel, hexanes:EtOAc, 10:1); IR (film)  $\nu_{\text{max}}$  2955, 2864, 1725, 1579, 1506, 1461, 1304, 1205, 1161, 1076, 980, 874  $\text{cm}^{-1}$ ;  $^1\text{H}$  NMR (500 MHz,  $\text{CDCl}_3$ )  $\delta$  8.01 (dd,  $J = 1.4, 0.7$  Hz, 1 H), 7.43 (t,  $J = 1.7$  Hz, 1 H), 6.75 (dd,  $J = 1.8, 0.7$  Hz, 1 H), 5.32 (s, 1 H), 4.18 (dd,  $J = 15.2, 10.6$  Hz, 2 H), 3.65 (s, 3 H), 2.28–2.25 (m, 1 H), 2.22–2.19 (m, 1 H), 1.67–1.52 (m, 2 H), 1.49–1.42 (m, 2 H), 1.39–1.28 (m, 2 H),



1.15 (s, 3 H), 1.00 (s, 3 H), 0.93 (s, 3 H);  $^{13}\text{C}$  NMR (125 MHz,  $\text{CDCl}_3$ )  $\delta$  176.7, 163.2, 147.5, 144.0, 143.6, 133.3, 119.8, 109.8, 72.1, 55.5, 51.9, 44.3, 35.8, 35.4, 34.7, 32.6, 31.8, 30.5, 29.4, 26.2; HRMS (ESI) calcd for  $\text{C}_{20}\text{H}_{27}\text{O}_5^+$  [ $\text{M} + \text{H}^+$ ] 347.1853, found 347.1854.

**Product flourophanol 37.** Pale yellow oil, 32.6 mg, 78% yield;  $R_f = 0.75$  (silica gel, hexanes:EtOAc, 10:1); IR (film)  $\nu_{\text{max}}$  2957, 2865, 1728, 1518, 1463, 1381, 1205, 1151, 1027, 996  $\text{cm}^{-1}$ ;  $^1\text{H}$  NMR (500 MHz,  $\text{CDCl}_3$ )  $\delta$  5.34 (s, 1 H), 4.08 (d,  $J = 8.6$  Hz, 1 H), 4.00 (d,  $J = 8.6$  Hz, 1 H), 3.64 (s, 3 H), 2.27–2.23 (m, 1 H), 2.22–2.19 (m, 1 H), 1.69–1.59 (m, 2 H), 1.50–1.44 (m, 2 H), 1.39–1.27 (m, 2 H), 1.26 (s, 3 H), 0.98 (s, 3 H), 0.93 (s, 3 H);  $^{13}\text{C}$  NMR (125 MHz,  $\text{CDCl}_3$ )  $\delta$  176.6, 143.7, 142.8, 140.7, 139.1, 138.0, 137.1, 136.0, 134.5, 133.6, 83.8, 55.6, 51.8, 45.4, 35.8, 35.3, 34.8, 32.6, 31.6, 30.4, 29.3, 25.5; HRMS (ESI) calcd for  $\text{C}_{21}\text{H}_{24}\text{O}_3\text{F}_5^+$  [ $\text{M} + \text{H}^+$ ] 419.1640, found 419.1649.

**Product Benzotriazole 38.** Pale yellow oil, 3.3 mg, 9% yield;  $R_f = 0.16$  (silica gel, hexanes:EtOAc, 10:1); IR (film)  $\nu_{\text{max}}$  2956, 2864, 1725, 1462, 1376, 1358, 1263, 1239, 1206, 1153, 1088, 952, 744;  $^1\text{H}$  NMR (500 MHz,  $\text{CDCl}_3$ )  $\delta$  8.00 (d,  $J = 8.4$  Hz, 1 H), 7.63 (d,  $J = 8.3$  Hz, 1 H), 7.49 (ddd,  $J = 8.4, 7.0, 0.7$  Hz, 1 H), 7.37 (ddd,  $J = 8.4, 6.9, 0.9$  Hz, 1 H), 5.46 (s, 1 H), 4.44 (dd,  $J = 43.2, 7.8$  Hz, 2 H), 3.60 (s, 1 H), 2.33–2.30 (m, 1 H), 2.26–2.23 (m, 1 H), 1.79–1.69 (m, 2 H), 1.56–1.49 (m, 2 H), 1.43–1.30 (m, 2 H), 1.41 (s, 3 H), 1.03 (s, 3 H), 0.96 (s, 3 H);  $^{13}\text{C}$  NMR (125 MHz,  $\text{CDCl}_3$ )  $\delta$  176.5, 143.7, 134.1, 127.7, 127.2, 124.5, 108.9, 88.5, 55.7, 52.0, 44.3, 35.7, 35.4, 34.7, 32.8, 31.6, 30.5, 29.3, 26.0, 20.3, 13.7; HRMS (ESI) calcd for  $\text{C}_{21}\text{H}_{28}\text{O}_3\text{N}_3^+$  [ $\text{M} + \text{H}^+$ ] 370.2125, found 370.2113.

**Product 39.** Colorless oil, 24.0 mg, 96% yield;  $R_f = 0.64$  (silica gel, hexanes:EtOAc, 10:1);  $[\alpha]_{\text{D}}^{20} = +44.0^\circ$  ( $c = 0.55$  in  $\text{CHCl}_3$ ); IR (film)  $\nu_{\text{max}}$  2955, 2868, 2865, 1744, 1455, 1383, 1370, 1242, 1034  $\text{cm}^{-1}$ ;  $^1\text{H}$  NMR (500 MHz,  $\text{CDCl}_3$ )  $\delta$  5.30 (s, 1 H), 3.84 (d,  $J = 10.4$  Hz, 1 H), 3.72 (d,  $J = 10.4$  Hz, 1 H), 3.71 (s, 3 H), 2.20–2.13 (m, 1 H), 2.12–2.08 (m, 1 H), 2.07 (s, 3 H), 1.88–1.84 (m, 1 H), 1.74–1.68 (m, 1 H), 1.56 (d,  $J = 13.2$  Hz, 1 H), 1.40 (d,  $J = 13.2$  Hz, 1 H), 1.20–1.13 (m, 1 H), 1.16 (s, 3 H), 1.06–1.00 (m, 1 H), 1.03 (s, 3 H), 0.95 (d,  $J = 7.0$  Hz, 3 H), 0.79 (s, 3 H);  $^{13}\text{C}$  NMR (125 MHz,  $\text{CDCl}_3$ )  $\delta$  171.5, 148.2, 125.7, 73.5, 52.1, 51.0, 42.5, 39.4, 32.0, 31.2, 28.2, 24.4, 23.8, 23.0, 22.3, 21.0; HRMS (CI) calcd for  $\text{C}_{16}\text{H}_{27}\text{O}_2^+$  [ $\text{M} + \text{H}^+$ ] 251.2006, found 251.2002.

**Product 40.** Yellow oil, 24.2 mg, 87% yield;  $R_f = 0.26$  (silica gel, hexanes:EtOAc, 10:1); IR (film)  $\nu_{\text{max}}$  2954, 2866, 1742, 1459, 1384, 1370, 1247, 1152, 1034, 848  $\text{cm}^{-1}$ ;  $^1\text{H}$  NMR (500 MHz,  $\text{CDCl}_3$ )  $\delta$  5.34 (s, 1 H), 4.00 (dd,  $J = 20.2, 10.5$  Hz, 2 H), 3.69 (s, 3 H), 2.27–2.23 (m, 1 H), 2.16 (d,  $J = 12.9$  Hz, 1 H), 2.06 (s, 3 H), 1.90 (td,  $J = 12.9, 6.9$  Hz, 1 H), 1.72 (d,  $J = 13.0$  Hz, 1 H), 1.68 (ddd,  $J = 13.3, 7.5, 1.0$  Hz, 1H), 1.44 (td,  $J = 12.4, 7.5$  Hz, 1 H), 1.14 (s, 3 H), 1.10 (s, 6 H);  $^{13}\text{C}$  NMR (125 MHz,  $\text{CDCl}_3$ )  $\delta$  177.5, 171.2, 10, 134.9, 70.9, 66.2, 52.2, 51.9, 50.9, 40.1, 39.6, 35.7, 30.8, 27.5, 25.9, 21.0; HRMS (CI) calcd for  $\text{C}_{16}\text{H}_{25}\text{O}_4^+$  [ $\text{M} + \text{H}^+$ ] 281.1753, found 281.1757.

**Product 41.** Yellow oil, 26.4 mg, 73% yield;  $R_f = 0.29$  (silica gel, hexanes:EtOAc, 10:1); IR (film)  $\nu_{\text{max}}$  2959, 2870, 1742, 1714, 1462, 1384, 1372, 1245, 1036  $\text{cm}^{-1}$ ;  $^1\text{H}$  NMR (500 MHz,  $\text{CDCl}_3$ )  $\delta$  5.29 (s, 1 H), 3.99 (s, 2 H), 2.73 (d,  $J = 14.2$  Hz, 1 H), 2.13 (d,  $J = 14.2$  Hz, 1 H), 2.08 (s, 3 H), 1.90 (td,  $J = 12.9, 6.8$  Hz, 1 H), 1.72 (td,  $J = 12.6, 7.1$  Hz, 1 H), 1.62–1.59 (m, 1 H), 1.53–1.51 (m, 1 H), 1.31 (s, 3 H), 1.17 (s, 3 H), 1.06 (s, 3 H), 1.00 (s, 3H);  $^{13}\text{C}$  NMR (125

MHz, CDCl<sub>3</sub>) δ 213.8, 171.1, 148.6, 130.6, 71.9, 54.2, 49.2, 44.4, 38.8, 33.4, 31.0, 30.9, 30.8, 26.4, 26.0, 20.9; HRMS (ESI) calcd for C<sub>16</sub>H<sub>25</sub>O<sub>3</sub><sup>+</sup> [M + H<sup>+</sup>] 265.1798, found 265.1792.

**Product O-tethered 42.** Yellow oil, 24.5 mg, 83% yield; R<sub>f</sub> = 0.18 (silica gel, hexanes:EtOAc = 10:1); IR (film) ν<sub>max</sub>; <sup>1</sup>H NMR (500 MHz, CDCl<sub>3</sub>) δ 5.33 (s, 1H), 3.94 (dd, *J* = 35.7, 10.9 Hz, 2 H), 3.74 (dd, *J* = 54.8, 9.4 Hz, 2 H), 3.73 (s, 3 H), 2.19–2.15 (m, 1 H), 2.04 (s, 3 H), 1.64–1.59 (m, 1 H), 1.58–1.48 (m, 2 H), 1.20 (s, 3 H), 1.06 (s, 3 H), 0.98 (s, 3 H); <sup>13</sup>C NMR (125 MHz, CDCl<sub>3</sub>) δ 173.1, 171.0, 140.0, 133.8, 84.8, 76.8, 69.6, 52.3, 44.3, 33.0, 32.9, 30.3, 30.2, 29.1, 23.8, 20.9; HRMS (ESI) calcd for C<sub>16</sub>H<sub>24</sub>O<sub>5</sub>Na<sup>+</sup> [M + Na<sup>+</sup>] 319.1516, found: 319.1523

**Product OBn 43.** Pale yellow oil, 27.2 mg, 68% yield; R<sub>f</sub> = 0.31 (silica gel, hexanes:EtOAc, 10:1); IR (film) ν<sub>max</sub> 2953, 2862, 1727, 1454, 1377, 1360, 1244, 1212, 1151, 1100, 1035, 731, 698 cm<sup>-1</sup>; <sup>1</sup>H NMR (500 MHz, CDCl<sub>3</sub>) δ 7.35–7.27 (m, 5 H), 5.39 (s, 1 H), 4.50 (s, 2 H), 4.14 (dd, *J* = 21.0, 10.5 Hz, 2 H), 3.66 (s, 3 H), 3.45 (d, *J* = 8.8 Hz, 1 H), 3.23 (d, *J* = 8.8 Hz, 1 H), 2.22–2.16 (m, 2 H), 2.00 (s, 3 H), 1.90–1.86 (m, 1 H), 1.47–1.31 (m, 5 H), 0.99 (s, 3 H), 0.92 (s, 3 H); <sup>13</sup>C NMR (125 MHz, CDCl<sub>3</sub>) δ 176.8, 171.0, 140.5, 138.8, 134.0, 128.3, 127.4, 127.2, 74.0, 73.2, 67.6, 55.5, 51.9, 48.1, 36.1, 34.9, 32.6, 31.5, 30.7, 30.5, 29.5, 21.0; HRMS (ESI) calcd for C<sub>24</sub>H<sub>32</sub>O<sub>5</sub>Na<sup>+</sup> [M + Na<sup>+</sup>] 423.2142, found 423.2117.

**Product 6-membered ring 44.** Pale yellow oil, 7.4 mg, 24% yield; R<sub>f</sub> = 0.18 (silica gel, hexanes:EtOAc, 10:1); IR (film) ν<sub>max</sub> 2951, 2863, 1726, 1453, 1386, 1371, 1241, 1154, 1058, 1031, 1000, 976 cm<sup>-1</sup>; <sup>1</sup>H NMR (500 MHz, CDCl<sub>3</sub>) δ 5.47 (s, 1 H), 3.75 (s, 2 H), 3.63 (s, 3 H), 2.44–2.41 (m, 1 H), 2.03 (s, 3 H), 1.78–1.75 (m, 1 H), 1.68–1.64 (m, 1 H), 1.57–1.47 (m, 4 H), 1.33–1.30 (m, 1 H), 1.24–1.18 (m, 1 H), 1.13–1.06 (m, 1 H), 1.09 (s, 3 H), 1.00 (s, 3 H), 0.96 (s, 3 H); <sup>13</sup>C NMR (125 MHz, CDCl<sub>3</sub>) δ 176.7, 171.2, 136.9, 136.4, 69.6, 51.8, 46.6, 39.0, 37.3, 35.5, 35.4, 32.9, 32.5, 30.8, 29.1, 25.8, 20.9, 19.2; HRMS (ESI) calcd for C<sub>18</sub>H<sub>29</sub>O<sub>4</sub><sup>+</sup> [M + H<sup>+</sup>] 309.2060, found 309.2051.

## Mechanism Study

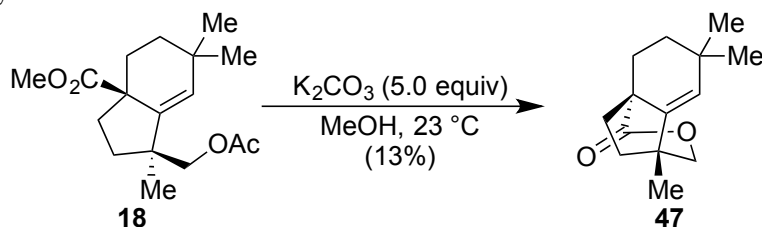

**Bicycle 47.** To a solution of cyclized product **18** (0.294 g, 1.00 mmol, 1.0 equiv) in MeOH (10 mL) was added K<sub>2</sub>CO<sub>3</sub> (0.690 g, 5.00 mmol, 5.0 equiv). The resultant mixture was then stirred for 12 h at 23 °C. The reaction contents were diluted with EtOAc (10 mL) and quenched by the addition of saturated aqueous NH<sub>4</sub>Cl (10 mL). The mixture was poured into a separatory funnel and the layers were separated. The aqueous layer was then extracted with EtOAc (2 × 10 mL). The combined organic layers were washed with H<sub>2</sub>O (10 mL) and brine (10 mL) before being dried (Na<sub>2</sub>SO<sub>4</sub>), filtered, and concentrated. The resultant residue was purified by flash column chromatography (silica gel, hexanes:Et<sub>2</sub>O, 20:1→10:1) to provide bicycle **47** (28.4 mg, 13% yield) as a yellow solid. **47**: R<sub>f</sub> = 0.66 (silica gel, hexanes:EtOAc, 5:1); IR (film) ν<sub>max</sub> 2955, 2870, 1743, 1597, 1563, 1467, 1395, 1351, 1219, 1126, 1104, 1054, 1034, 992, 880, 864 cm<sup>-1</sup>; <sup>1</sup>H NMR (500 MHz, CDCl<sub>3</sub>) δ 5.28 (s, 1 H), 4.02 (d, *J* = 9.6 Hz, 1 H), 3.83 (dd, *J* = 9.6 Hz, 1.7 Hz, 1 H), 2.60–2.53 (m, 1 H), 2.21 (ddd, *J* = 13.1, 9.6, 4.4 Hz, 1 H), 1.95 (ddd, *J* = 14.7, 9.5, 5.5 Hz, 1 H), 1.74 (tdd, *J* = 12.6, 4.3, 2.0 Hz, 1 H), 1.61 (td, *J* = 18.1 Hz, 5.4 Hz, 1 H), 1.48–1.42 (m, 1 H), 1.40–1.32 (m, 2 H), 1.13 (s, 3 H), 0.99 (s, 3 H), 0.97 (s, 3 H); <sup>13</sup>C NMR (125 MHz, CDCl<sub>3</sub>) δ 174.9, 139.5, 126.6, 82.2, 50.7, 42.2, 36.8, 35.8, 35.0, 31.6, 30.6, 28.1, 26.2, 16.6; HRMS (ESI) calcd for C<sub>14</sub>H<sub>21</sub>O<sub>2</sub><sup>+</sup> [M + H<sup>+</sup>] 221.1536, found 221.1539. For the 2D NMR, see final section of the Supporting Information Section.

**D-labeled 47.** The D-labeled variant of **18** was prepared by the described procedure used for **S9**. The D-labeled side chain (*E*)-4-iodo-2-methylbut-1-ene-1-*d* was prepared according to Prof. Brown's method.<sup>[8]</sup> D-labeled **47** was prepared as described above. **D-labeled 47**: <sup>1</sup>H NMR (500 MHz, CDCl<sub>3</sub>) δ 5.28 (s, 1 H), 3.81 (s, 1 H), 2.62–2.54 (m, 1 H), 2.21 (ddd, *J* = 13.1, 9.6, 4.4 Hz, 1 H), 1.95 (ddd, *J* = 14.7, 9.5, 5.5 Hz, 1 H), 1.75 (tdd, *J* = 12.6, 4.3, 2.0 Hz, 1 H), 1.61 (td, *J* = 18.1 Hz, 5.4 Hz, 1 H), 1.49–1.42 (m, 1 H), 1.40–1.35 (m, 2 H), 1.13 (s, 3 H), 0.99 (s, 3 H), 0.98 (s, 3 H). As shown in COSY and nOe of **47**, the chemical shift of H<sub>1</sub> and H<sub>2</sub> are distinct at 3.83 and 4.02 ppm. In the <sup>1</sup>H NMR of **D-labeled 47**, H<sub>1</sub> is missing; thus, the stereochemistry of **D-labeled 47** is confirmed. See the NMR section itself for the H<sub>1</sub> and H<sub>2</sub> labeled protons.

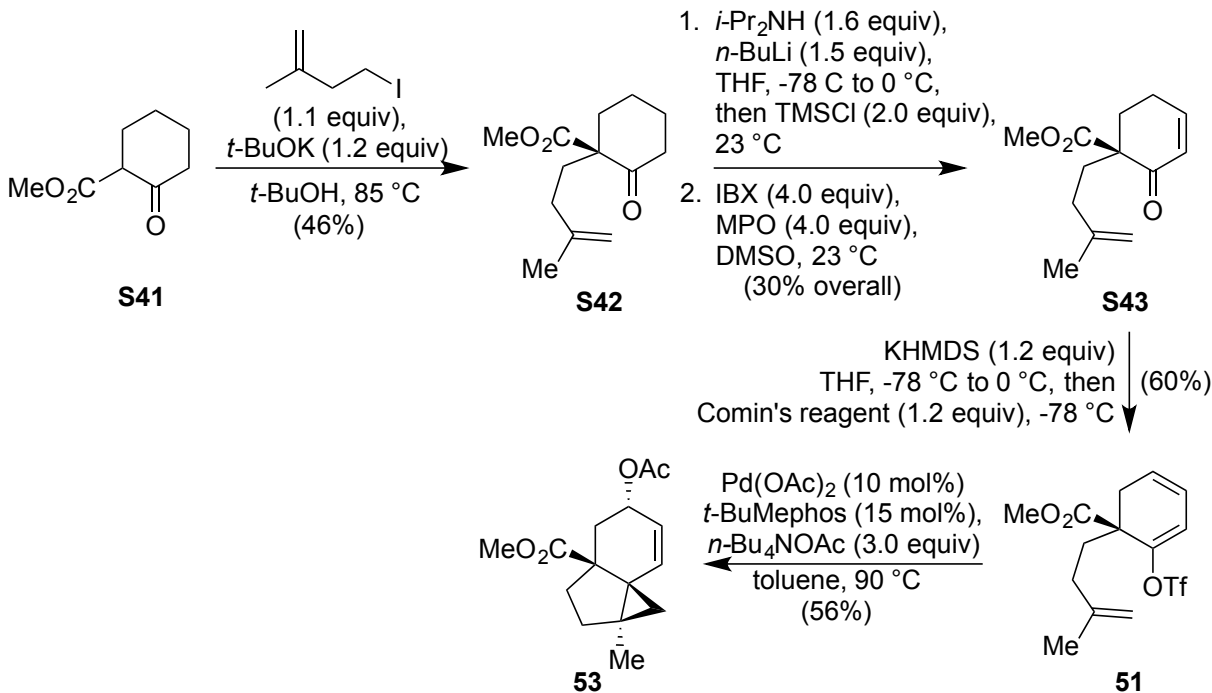

**Cyclopropane S45.** Ketone **S42** (0.103 g, 46% yield) was prepared as a colorless oil from commercial methyl 2-oxocyclohexane-1-carboxylate (**S41**, 0.156 g, 1.00 mmol, 1.0 equiv) and 4-iodo-2-methylbut-1-ene (0.216 g, 1.10 mmol, 1.1 equiv) by the procedure described above. **S42**:  $R_f = 0.29$  (silica gel, hexanes:EtOAc, 10:1); IR (film)  $\nu_{\text{max}}$  2949, 2865, 1714, 1650, 1450, 1215, 1135, 889  $\text{cm}^{-1}$ ;  $^1\text{H NMR}$  (500 MHz,  $\text{CDCl}_3$ )  $\delta$  4.70 (s, 1 H), 4.68 (s, 1 H), 3.73 (s, 1 H), 2.54–2.51 (m, 1 H), 2.46–2.43 (m, 1 H), 2.05–2.00 (m, 2 H), 1.96–1.84 (m, 1 H), 1.78–1.65 (m, 3 H), 1.72 (s, 3 H), 1.50–1.44 (m, 1 H);  $^{13}\text{C NMR}$  (125 MHz,  $\text{CDCl}_3$ )  $\delta$  207.7, 127.5, 145.3, 110.0, 60.1, 52.2, 41.1, 36.0, 32.9, 32.3, 27.6, 22.54, 22.52; HRMS (ESI) calcd for  $\text{C}_{13}\text{H}_{21}\text{O}_3^+$  [ $\text{M} + \text{H}^+$ ] 225.1485, found 225.1472. Next, to a solution of  $i\text{-Pr}_2\text{NH}$  (0.440 mL, 3.20 mmol, 1.6 equiv) in THF (5 mL) at 0  $^\circ\text{C}$  was added  $n\text{-BuLi}$  (1.20 mL, 2.5 M in hexanes, 3.00 mmol, 1.5 equiv), The resultant solution was then stirred for 15 min at 0  $^\circ\text{C}$ . The reaction contents were then cooled to –78  $^\circ\text{C}$  and a solution of ketone **S42** (0.448 g, 2.00 mmol, 1.0 equiv) in THF (5 mL) was added dropwise. After warming to 0  $^\circ\text{C}$  and stirring at that temperature for 90 min, the solution was recooled to –78  $^\circ\text{C}$  and  $\text{TMSCl}$  (0.510 mL, 4.00 mmol, 2.0 equiv) was added. The resultant solution was slowly warmed to 23  $^\circ\text{C}$  and stirred for 12 h. Upon completion, the reaction contents were quenched by the addition of saturated aqueous  $\text{NH}_4\text{Cl}$  (10 mL). The mixture was then poured into a separatory funnel and the layers were separated. The aqueous layer was extracted with EtOAc ( $2 \times 10$  mL). The combined organic layers were then washed with brine (10 mL) before being dried ( $\text{Na}_2\text{SO}_4$ ), filtered, and concentrated to provide the desired crude TMS enol ether intermediate (2.00 mmol assumed) directly used for next step without any further purification. Pressing forward, IBX (2.24 g, 8.00 mmol, 4.0 equiv) and MPO (1.00 g, 5.00 mmol, 2.5 equiv) was dissolved in DMSO (20 mL). This solution was then added to a solution of the crude enol ether (2.00 mmol assumed, 1.0 equiv) in DMSO (2.5 mL) at 23  $^\circ\text{C}$ . The resultant mixture was stirred at 23  $^\circ\text{C}$  for 6 h. Upon completion, the reaction contents were diluted with  $\text{Et}_2\text{O}$  (10 mL) and quenched by the addition of saturated aqueous  $\text{NaHCO}_3$  (10 mL). The mixture was poured into a separatory funnel and the layers were separated. The aqueous layer was then extracted with  $\text{Et}_2\text{O}$  ( $2 \times 10$  mL). The combined organic layers were washed with

saturated aqueous NaHCO<sub>3</sub> (10 mL), H<sub>2</sub>O (10 mL) and brine (10 mL) before being dried (Na<sub>2</sub>SO<sub>4</sub>), filtered, and concentrated. The resultant residue was purified by flash column chromatography (silica gel, hexanes:EtOAc, 20:1→10:1) to provide enone **S43** (0.242 g, 30% yield from ketone **S42**)<sup>[9]</sup> as a pale yellow oil. **S43**: *R*<sub>f</sub> = 0.46 (silica gel, hexanes:EtOAc, 5:1); IR (film) *v*<sub>max</sub> 2953, 1723, 1686, 1449, 1386, 1245, 1205, 1081, 889 cm<sup>-1</sup>; <sup>1</sup>H NMR (500 MHz, CDCl<sub>3</sub>) δ 6.91–6.88 (m, 1 H), 6.01 (dt, *J* = 10.1, 1.7 Hz, 1 H), 4.69 (s, 1 H), 4.68 (s, 1 H), 3.68 (s, 3 H), 2.54–2.46 (m, 2 H), 2.37–2.30 (m, 1 H), 2.09–2.03 (m, 1 H), 1.99–1.94 (m, 1 H), 1.87–1.81 (m, 1 H), 1.72 (s, 3 H); <sup>13</sup>C NMR (125 MHz, CDCl<sub>3</sub>) δ 196.2, 172.0, 149.5, 145.2, 129.1, 110.2, 56.8, 52.4, 32.6, 31.9, 29.9, 23.6, 22.5; HRMS (ESI) calcd for C<sub>13</sub>H<sub>19</sub>O<sub>3</sub><sup>+</sup> [*M* + H<sup>+</sup>] 223.1329, found 223.1333. Next, triflate **51** was prepared as described above starting from **S43** (0.111 g, 5.00 mmol, 1.0 equiv) to afford triflate **51** (0.104 g, 60% yield) as a colorless oil. **51**: *R*<sub>f</sub> = 0.62 (silica gel, hexanes:EtOAc, 10:1); IR (film) *v*<sub>max</sub> 2956, 1714, 1654, 1416, 1213, 1143, 1060, 891, 702 cm<sup>-1</sup>; <sup>1</sup>H NMR (500 MHz, CDCl<sub>3</sub>) δ 6.05–6.04 (m, 1 H), 5.87–5.82 (m, 1 H), 4.73 (s, 1 H), 4.71 (s, 1 H), 3.74 (s, 3 H), 3.07 (dd, *J* = 17.7, 4.2 Hz, 1 H), 2.53–2.49 (m, 1 H), 2.04–1.98 (m, 3 H), 1.94–1.88 (m, 1 H), 1.72 (s, 3 H); <sup>13</sup>C NMR (125 MHz, CDCl<sub>3</sub>) δ 172.7, 148.1, 144.5, 126.1, 120.8, 115.35, 115.34, 115.33, 110.6, 52.6, 49.5, 33.7, 32.7, 32.5, 22.4; HRMS (ESI) calcd for C<sub>14</sub>H<sub>18</sub>O<sub>5</sub>F<sub>3</sub>S<sup>+</sup> [*M* + H<sup>+</sup>] 355.0822, found 355.0822. Finally, **53** was prepared following the general Pd-cyclization procedure defined above from **51** (35.4 mg, 0.1 mmol) to provide **53** (14.9 mg, 56% yield) as a pale yellow oil. **53**: *R*<sub>f</sub> = 0.29 (silica gel, hexanes:EtOAc, 10:1); IR (film) *v*<sub>max</sub> 2952, 2926, 2863, 1738, 1442, 1370, 1240, 1152, 1113, 1055, 1023 cm<sup>-1</sup>; <sup>1</sup>H NMR (500 MHz, CDCl<sub>3</sub>) δ 5.67–5.65 (m, 1 H), 5.59–5.55 (m, 1 H), 5.36 (dd, *J* = 10.0, 1.5 Hz, 1 H), 3.69 (s, 3H), 2.35–2.32 (m, 1 H), 2.06 (s, 3 H), 1.92–1.82 (m, 2 H), 1.71–1.62 (m, 2 H), 1.53–1.49 (m, 1 H), 1.29 (d, *J* = 5.8 Hz, 1 H), 1.16 (s, 3 H), 0.62 (d, *J* = 5.7 Hz, 1 H); <sup>13</sup>C NMR (125 MHz, CDCl<sub>3</sub>) δ 176.0, 170.6, 132.2, 126.7, 69.6, 54.2, 51.9, 35.82, 35.76, 32.6, 31.7, 31.3, 22.3, 21.3, 19.6; HRMS (ESI) calcd for C<sub>15</sub>H<sub>20</sub>O<sub>4</sub>Na<sup>+</sup> [*M* + Na<sup>+</sup>] 287.1254, found 287.1246.

## Total Synthesis of Members of the Botrydial Family of Natural Products

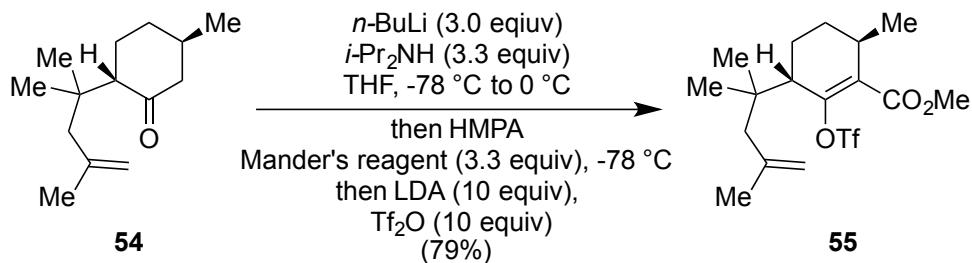

**Triflate 55.** To a solution of  $i\text{-Pr}_2\text{NH}$  (0.440 mL, 3.20 mmol, 3.2 equiv) in THF (3 mL) at  $0\text{ }^\circ\text{C}$  was added  $n\text{-BuLi}$  (1.20 mL, 2.5 M in hexanes, 3.00 mmol, 3.0 equiv) and the resultant solution was stirred at  $0\text{ }^\circ\text{C}$  for 15 min. The reaction contents were then cooled to  $-78\text{ }^\circ\text{C}$  and a solution of **54** (0.208 g, 1.00 mmol, 1.0 equiv) in THF (5 mL) was added dropwise over the course of 5 min. The reaction mixture was then warmed to  $0\text{ }^\circ\text{C}$  and kept at that temperature for 90 min before being cooled to  $-78\text{ }^\circ\text{C}$ . HMPA (0.50 mL) and a solution of Mander's reagent (0.280 g, 3.30 mmol, 3.3 equiv) in THF (2 mL) were then added sequentially. After stirring the resultant mixture at  $-78\text{ }^\circ\text{C}$  for 1 h, LDA (prepared from  $n\text{-BuLi}$  and  $i\text{-Pr}_2\text{NH}$  as described, 10.0 mL, 1.0 M in THF, 10.0 mmol, 10 equiv) was added at  $-78\text{ }^\circ\text{C}$  and was followed by the addition of  $\text{Tf}_2\text{O}$  (1.68 mL, 10.0 mmol, 10 equiv). The reaction contents were stirred at  $-78\text{ }^\circ\text{C}$  for 4 h before being quenched by the addition of saturated aqueous  $\text{NaHCO}_3$  (10 mL). The mixture was then warmed to  $23\text{ }^\circ\text{C}$ ,  $\text{H}_2\text{O}$  (10 mL) was added to dissolve any remaining solids, and the reaction contents was poured into a separatory funnel and the layers were separated. The aqueous layer was then extracted with  $\text{Et}_2\text{O}$  ( $2 \times 10\text{ mL}$ ). The combined organic layers were washed with saturated aqueous  $\text{NaHCO}_3$  (100 mL),  $\text{H}_2\text{O}$  (10 mL), and brine (10 mL), dried ( $\text{Na}_2\text{SO}_4$ ), filtered, and concentrated. The resultant residue was purified by flash column chromatography ( $\text{Et}_3\text{N}$ -buffered silica gel, hexanes) to provide triflate **55** (0.314 g, 79% yield) as a colorless oil. **55**:  $R_f = 0.65$  (silica gel, hexanes: $\text{EtOAc}$ , 15:1);  $[\alpha]_D^{20} = +94.0^\circ$  ( $c = 0.53$ ,  $\text{CHCl}_3$ ); IR (film)  $\nu_{\text{max}}$  2968, 1731, 1421, 1245, 1203, 1142, 1065, 1048, 961, 891, 810  $\text{cm}^{-1}$ ;  $^1\text{H}$  NMR (500 MHz,  $\text{CDCl}_3$ )  $\delta$  4.91 (s, 1 H), 4.68 (s, 1 H), 3.80 (s, 3 H), 2.75–2.72 (m, 1 H), 2.41–2.39 (m, 1 H), 2.16 (d,  $J = 13.1\text{ Hz}$ , 1 H), 1.98 (d,  $J = 13.1\text{ Hz}$ , 1 H), 1.91–1.87 (m, 3 H), 1.78 (s, 3 H), 1.38–1.33 (m, 1 H), 1.18 (d,  $J = 7.0\text{ Hz}$ , 3 H), 1.05 (s, 3 H), 1.01 (s, 3 H);  $^{13}\text{C}$  NMR (125 MHz,  $\text{CDCl}_3$ )  $\delta$  165.6, 151.4, 142.5, 131.9, 122.1, 119.6, 117.0, 115.3, 114.5, 52.0, 48.2, 45.9, 39.0, 31.5, 27.5, 27.2, 26.6, 25.5, 22.3, 20.9; HRMS (ESI) calcd for  $\text{C}_{17}\text{H}_{26}\text{O}_5\text{F}_3\text{S}^+ [\text{M} + \text{H}^+]$  399.1448, found 399.1436.

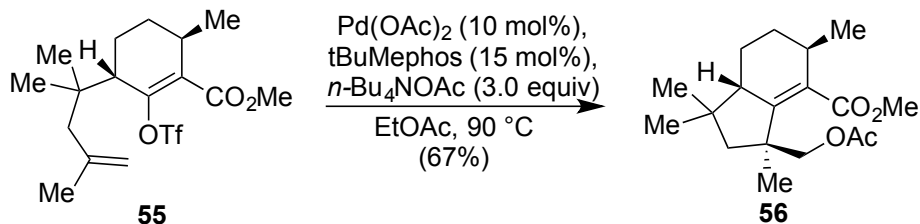

**Acetate 56.** To a flame-dried sealed tube was added  $\text{Pd}(\text{OAc})_2$  (0.112 g, 0.500 mmol, 10 mol %),  $t\text{-BuMephos}$  (0.234 g, 0.75 mmol, 15 mol %), and  $n\text{-Bu}_4\text{NOAc}$  (4.52 g, 15.0 mmol, 3.0 equiv). A solution of triflate **55** (1.99 g, 5.00 mmol, 1.0 equiv) in  $\text{EtOAc}$  (50 mL) was then added at  $23\text{ }^\circ\text{C}$ . The mixture was heated to  $90\text{ }^\circ\text{C}$  and stirred at this temperature for 12 h. Upon

completion, the reaction contents were cooled to 23 °C and filtered through a pad of silica gel (EtOAc). The filtrate was concentrated and the resultant residue was purified by flash column chromatography (silica gel, hexanes:EtOAc, 30:1) to provide acetate **56** (1.03 g, 67% yield) as a pale yellow oil. **56**:  $R_f = 0.48$  (silica gel, hexanes:EtOAc, 10:1);  $[\alpha]_D^{20} = +23.0^\circ$  ( $c = 1.0$  in  $\text{CHCl}_3$ ); IR (film)  $\nu_{\text{max}}$  2932, 2865, 1742, 1726, 1373, 1226, 1061, 1030  $\text{cm}^{-1}$ ;  $^1\text{H}$  NMR (500 MHz,  $\text{CDCl}_3$ )  $\delta$  4.24 (d,  $J = 10.3$  Hz, 1 H), 4.05 (d,  $J = 10.3$  Hz, 1 H), 3.71 (s, 3 H), 2.56–2.48 (m, 1 H), 2.15–2.11 (m, 1 H), 2.06 (s, 3 H), 1.93–1.88 (m, 1 H), 1.73 (d,  $J = 13.3$  Hz, 1 H), 1.71–1.66 (m, 1 H), 1.40 (d,  $J = 13.2$  Hz, 1 H), 1.25–1.06 (m, 2 H), 1.11 (s, 3 H), 1.00 (s, 3 H), 0.91 (d,  $J = 6.8$  Hz, 3 H), 0.78 (s, 3 H);  $^{13}\text{C}$  NMR (125 MHz,  $\text{CDCl}_3$ )  $\delta$  171.2, 170.8, 149.8, 131.5, 73.1, 53.7, 53.1, 51.1, 44.1, 39.0, 33.1, 31.4, 27.9, 23.7, 22.9, 22.1, 21.0, 20.1; HRMS (ESI) calcd for  $\text{C}_{18}\text{H}_{29}\text{O}_4^+ [\text{M} + \text{H}^+]$  309.2060, found 309.2063.

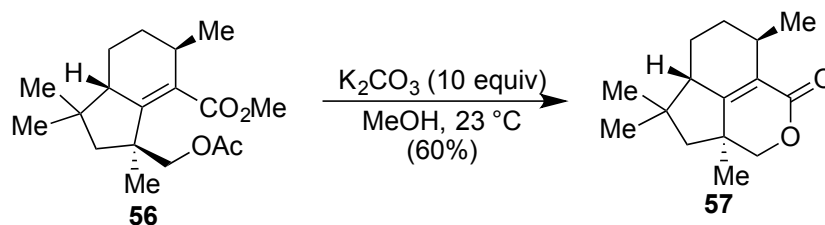

**Lactone 57.** To a solution of acetate **56** (0.616 g, 2.00 mmol, 1.0 equiv) in MeOH (20 mL) at 23 °C was added  $\text{K}_2\text{CO}_3$  (2.76 g, 20 mmol, 10 equiv), and the resultant mixture was stirred at 23 °C for 10 h. Upon completion, the reaction contents were diluted with EtOAc (10 mL) and quenched by the addition of saturated aqueous  $\text{NH}_4\text{Cl}$  (10 mL). The mixture was poured into a separatory funnel and the layers were separated. The aqueous layer was then extracted with EtOAc ( $2 \times 10$  mL). The combined organic layers were washed with  $\text{H}_2\text{O}$  ( $2 \times 10$  mL) and brine (10 mL) before being dried ( $\text{Na}_2\text{SO}_4$ ), filtered, and concentrated. The resultant residue was purified by flash column chromatography (silica gel, hexanes:EtOAc, 20:1→10:1) to provide lactone **57** (0.281 g, 60% yield) as a colorless solid. **57**:  $R_f = 0.58$  (silica gel, hexanes:EtOAc, 5:1);  $[\alpha]_D^{20} = -53.0^\circ$  ( $c = 0.30$  in  $\text{CHCl}_3$ ); IR (film)  $\nu_{\text{max}}$  2957, 2869, 1714, 1462, 1388, 1368, 1256, 1209, 1165, 1070, 1049, 1000, 974, 788  $\text{cm}^{-1}$ ;  $^1\text{H}$  NMR (500 MHz,  $\text{CDCl}_3$ )  $\delta$  4.08 (d,  $J = 10.4$  Hz, 1 H), 4.01 (d,  $J = 10.4$  Hz, 1 H), 2.78–2.72 (m, 1 H), 2.45 (ddd,  $J = 10.3, 6.8, 2.3$  Hz, 1 H), 1.68–1.58 (m, 1 H), 1.56 (d,  $J = 14.1$  Hz, 1 H), 1.50 (d,  $J = 13.9$  Hz, 1 H), 1.39–1.31 (m, 1 H), 1.24 (s, 3 H), 1.16 (s, 3 H), 1.02 (d,  $J = 7.0$  Hz, 1 H), 0.83 (s, 3 H);  $^{13}\text{C}$  NMR (125 MHz,  $\text{CDCl}_3$ )  $\delta$  166.5, 124.6, 50.4, 49.1, 41.6, 38.4, 29.3, 29.2, 25.9, 25.1, 25.0, 19.3, 16.1; HRMS (ESI) calcd for  $\text{C}_{15}\text{H}_{23}\text{O}_2^+ [\text{M} + \text{H}^+]$  235.1693, found 235.1700.

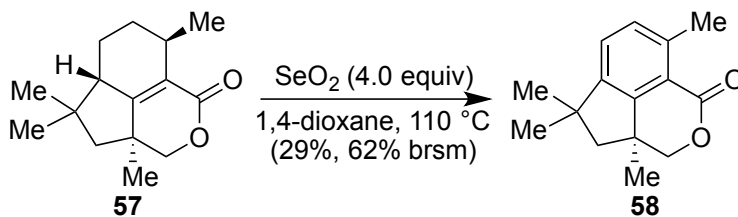

**10-oxodehydrodihydrobotrydial (58).**<sup>[10a]</sup> Lactone **57** (46.8 mg, 0.200 mmol, 1.0 equiv) in 1,4-dioxane (2 mL) was treated with  $\text{SeO}_2$  (88.8 mg, 0.800 mmol, 4.0 equiv). The resultant mixture was then heated at 110 °C for 12 h. Upon completion, the resultant mixture was cooled to 23 °C and filtered through a pad of silica gel (EtOAc). The filtrate was then

concentrated and the resultant residue was purified by column chromatography (hexanes: EtOAc = 100:1→50:1) to provide recovered starting material (24.9 mg) along with 10-oxodehydrodihydrobotrydial (**58**, 13.3 mg, 29% yield, 62% yield brsm) as a white solid. **58**:  $R_f$  = 0.68 (silica gel, hexanes: EtOAc = 5:1);  $[\alpha]_D^{20} = -95.0^\circ$  ( $c = 1.0$  in  $\text{CHCl}_3$ ); lit:  $[\alpha]_D^{28} = -166.5^\circ$  ( $c = 1.0$  in  $\text{CHCl}_3$ )<sup>[10b]</sup>; as such the rotation data showed this should be the enantiomer of the originally proposed structure for **58**, but the same absolute configuration as the reassignment by the Li group following their synthesis; IR (film)  $\nu_{\text{max}}$  2961, 2927, 2867, 1759, 1584, 1484, 1245, 1067, 829, 801, 532  $\text{cm}^{-1}$ ;  $^1\text{H}$  NMR (500 MHz,  $\text{CDCl}_3$ )  $\delta$  7.21 (d,  $J = 7.7$  Hz, 1 H), 7.15 (d,  $J = 7.7$  Hz, 1 H), 4.36 (d,  $J = 10.0$  Hz, 1 H), 4.13 (d,  $J = 10.0$  Hz, 1 H), 2.62 (s, 3 H), 1.98 (d,  $J = 12.8$  Hz, 1 H), 1.86 (d,  $J = 12.9$  Hz, 1 H), 1.51 (s, 3 H), 1.45 (s, 3 H), 1.32 (s, 3 H);  $^{13}\text{C}$  NMR (125 MHz,  $\text{CDCl}_3$ )  $\delta$  164.0, 151.4, 147.0, 139.6, 131.7, 127.2, 119.6, 79.2, 52.1, 45.1, 40.8, 30.8, 30.7, 24.7, 20.2; HRMS (ESI) calcd for  $\text{C}_{15}\text{H}_{19}\text{O}_2^+$   $[\text{M} + \text{H}^+]$  231.1380, found 231.1388.

**Table S1.** Comparison of literature and obtained spectral values for 10-oxodehydrodihydrobotrydial (**58**)<sup>[10a]</sup>

| $^1\text{H}$ NMR in $\text{CDCl}_3$    |                                |
|----------------------------------------|--------------------------------|
| Natural (Collado, 400 MHz)             | Synthetic (This work, 500 MHz) |
| 7.20 (d, $J = 7.8$ Hz, 1 H)            | 7.21 (d, $J = 7.7$ Hz, 1 H)    |
| 7.14 (d, $J = 7.8$ Hz, 1 H)            | 7.15 (d, $J = 7.7$ Hz, 1 H)    |
| 4.35 (d, $J = 10.1$ Hz, 1 H)           | 4.36 (d, $J = 10.0$ Hz, 1 H)   |
| 4.12 (d, $J = 10.1$ Hz, 1 H)           | 4.13 (d, $J = 10.0$ Hz, 1 H)   |
| 2.61 (s, 3 H)                          | 2.62 (s, 3 H)                  |
| 1.96 (d, $J = 13.0$ Hz, 1 H)           | 1.98 (d, $J = 13.0$ Hz, 1 H)   |
| 1.84 (d, $J = 13.0$ Hz, 1 H)           | 1.86 (d, $J = 13.0$ Hz, 1 H)   |
| 1.50 (s, 3 H)                          | 1.50 (s, 3 H)                  |
| 1.44 (s, 3 H)                          | 1.45 (s, 3 H)                  |
| 1.31 (s, 3 H)                          | 1.32 (s, 3 H)                  |
| $^{13}\text{C}$ NMR in $\text{CDCl}_3$ |                                |
| Natural (Collado, 100 MHz)             | Synthetic (This work, 125 MHz) |
| 164.0                                  | 164.0                          |
| 151.4                                  | 151.4                          |
| 147.0                                  | 147.0                          |
| 139.6                                  | 139.6                          |
| 131.7                                  | 131.7                          |
| 127.3                                  | 127.2                          |
| 119.6                                  | 119.6                          |
| 79.2                                   | 79.2                           |



|      |      |
|------|------|
| 52.1 | 52.1 |
| 45.1 | 45.1 |
| 40.4 | 40.5 |
| 30.7 | 30.8 |
| 30.7 | 30.7 |
| 24.7 | 24.7 |
| 20.3 | 20.2 |

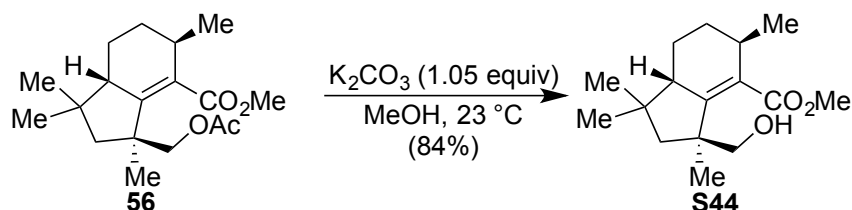

**Alcohol S44.** To a solution of acetate **56** (1.23 g, 4.00 mmol, 1.0 equiv) in MeOH (40 mL) at 23 °C was added  $K_2CO_3$  (0.580 g, 4.20 mmol, 1.05 equiv), and the resultant mixture was stirred at 23 °C for 10 h. Upon completion, the reaction mixture was quenched by the addition of saturated aqueous  $NH_4Cl$  (30 mL), poured into a separatory funnel, and the resultant layers were separated. The aqueous layer was then extracted with EtOAc ( $2 \times 30$  mL). The combined organic layers were washed with  $H_2O$  (30 mL) and brine (30 mL) before being dried ( $Na_2SO_4$ ), filtered, and concentrated. The resultant residue was purified by flash column chromatography (silica gel, hexanes:EtOAc, 10:1→5:1) to provide alcohol **S44** (0.894 g, 84% yield) as a white solid. **S44**:  $R_f = 0.33$  (silica gel, hexanes: EtOAc = 5:1);  $[\alpha]_D^{20} = -19.0^\circ$  ( $c = 0.53$  in  $CHCl_3$ ); IR (film)  $\nu_{max}$  3438, 2921, 2864, 1718, 1656, 1446, 1366, 1261, 1225, 1060, 981, 750  $cm^{-1}$ ;  $^1H$  NMR (500 MHz,  $CDCl_3$ ) 3.75 (s, 3 H), 3.45–3.40 (m, 2 H), 3.21 (dd,  $J = 6.6, 5.8$  Hz, 1 H), 2.56–2.48 (m, 1 H), 2.14–2.10 (m, 1 H), 1.93–1.88 (m, 1 H), 1.72–1.68 (m, 1 H), 1.59 (d,  $J = 13.0$  Hz, 1 H), 1.40 (d,  $J = 12.9$  Hz, 1 H), 1.25–1.08 (m, 2 H), 1.10 (s, 3 H), 1.01 (s, 3 H), 0.93 (d,  $J = 6.8$  Hz, 3 H), 0.79 (s, 3 H);  $^{13}C$  NMR (125 MHz,  $CDCl_3$ )  $\delta$  172.2, 151.2, 131.2, 71.7, 54.1, 53.0, 51.6, 46.6, 38.5, 33.2, 31.4, 27.8, 23.9, 22.4, 22.1, 20.2; HRMS (ESI) calcd for  $C_{16}H_{27}O_3^+$  [ $M + H^+$ ] 267.1955, found 267.1965.

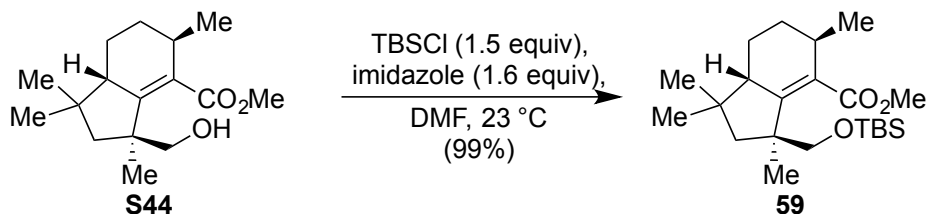

**TBS-Protected Ether 59.** To a solution of alcohol **S44** (0.266 g, 1.00 mmol, 1.0 equiv) in DMF (10 mL) at 23 °C was sequentially added imidazole (0.109 g, 1.60 mmol, 1.6 equiv) and TBSCl (0.225 g, 1.50 mmol, 1.5 equiv). The resultant solution was stirred at 23 °C for 12 h. Upon completion, the reaction contents were quenched by the addition of saturated aqueous  $NH_4Cl$  (10 mL), poured into a separatory funnel, and the resultant layers were separated. The aqueous layer was then extracted with  $Et_2O$  ( $2 \times 10$  mL). The combined organic layers were

washed with H<sub>2</sub>O (4 × 10 mL) and brine (10 mL) before being dried (Na<sub>2</sub>SO<sub>4</sub>), filtered, and concentrated. The resultant residue was purified by flash column chromatography (silica gel, hexanes:EtOAc, 20:1) to provide **59** (0.380 g, 99% yield). **59**: R<sub>f</sub> = 0.39 (silica gel, hexanes:EtOAc, 20:1); [α]<sub>D</sub><sup>20</sup> = +30.0° (c = 1.0 in CHCl<sub>3</sub>); IR (film) ν<sub>max</sub> 2930, 2857, 1727, 1432, 1385, 1254, 1226, 1212, 1060, 837 cm<sup>-1</sup>; <sup>1</sup>H NMR (500 MHz, CDCl<sub>3</sub>) δ 3.80 (d, *J* = 8.7 Hz, 1 H), 3.70 (s, 3 H), 3.39 (d, *J* = 8.7 Hz, 1 H), 2.54–2.48 (m, 1 H), 2.18–2.14 (m, 1 H), 2.04 (d, *J* = 12.7 Hz, 1 H), 1.90–1.86 (m, 1 H), 1.68–1.63 (m, 1 H), 1.23 (d, *J* = 12.8 Hz, 1 H), 1.17–1.08 (m, 2 H), 1.001 (s, 3 H), 0.995 (s, 3 H), 0.90 (d, *J* = 6.8 Hz, 3 H), 0.88 (s, 9 H), 0.77 (s, 3 H), 0.04 (s, 3 H), 0.03 (s, 3 H); <sup>13</sup>C NMR (125 MHz, CDCl<sub>3</sub>) δ 171.2, 152.2, 129.4, 71.6, 53.9, 52.7, 50.9, 46.3, 38.9, 33.1, 27.9, 24.0, 22.8, 22.3, 20.1, 18.2, -5.3, -5.4; HRMS (ESI) calcd for C<sub>22</sub>H<sub>41</sub>O<sub>3</sub>Si<sup>+</sup> [M + H<sup>+</sup>] 381.2819, found 381.2826.

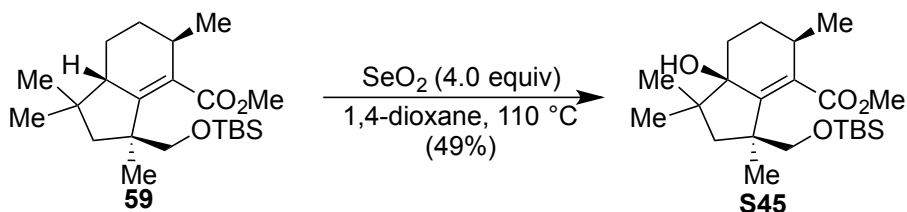

**Allylic alcohol S45.** To a solution of **59** (0.076 g, 0.200 mmol, 1.0 equiv) in 1,4-dioxane (2 mL) at 23 °C was added SeO<sub>2</sub> (0.089 g, 0.800 mmol, 4.0 equiv). The resultant mixture was then heated at 110 °C for 12 h. Upon completion, the resultant mixture was cooled to 23 °C and filtered through a pad of silica gel (EtOAc). The filtrate was then concentrated and the resultant residue was purified by column chromatography (hexanes: EtOAc = 100:1→50:1) to provide allylic alcohol **S45** (0.039 g, 49% yield) as a colorless oil. **S45**: R<sub>f</sub> = 0.53 (silica gel, hexanes:EtOAc, 10:1); [α]<sub>D</sub><sup>20</sup> = +10.0° (c = 0.21 in CHCl<sub>3</sub>); IR (film) ν<sub>max</sub> 3426, 2951, 2931, 2860, 1720, 1471, 1251, 1215, 1065, 782 cm<sup>-1</sup>; <sup>1</sup>H NMR (500 MHz, CDCl<sub>3</sub>) δ 4.59 (d, *J* = 2.0 Hz, 1 H), 4.02 (d, *J* = 8.5 Hz, 1 H), 3.72 (s, 3 H), 3.21 (d, *J* = 8.5 Hz, 1 H), 2.49–2.44 (m, 1 H), 2.20 (d, *J* = 12.8 Hz, 1 H), 1.73–1.54 (m, 2 H), 1.39–1.34 (m, 1 H), 1.15 (d, *J* = 12.8 Hz, 1 H), 1.023 (s, 3 H), 1.017 (s, 3 H), 0.93 (d, *J* = 6.9 Hz, 1 H), 0.92 (s, 3 H), 0.85 (s, 3 H), 0.113 (s, 3 H), 0.111 (s, 3 H); <sup>13</sup>C NMR (125 MHz, CDCl<sub>3</sub>) δ 170.8, 148.8, 134.2, 79.6, 71.8, 51.1, 49.7, 45.2, 43.4, 33.7, 27.0, 26.9, 26.7, 25.9, 23.3, 21.6, 19.8, 18.4, -5.5, -5.6; HRMS (ESI) calcd for C<sub>22</sub>H<sub>39</sub>O<sub>3</sub>Si<sup>+</sup> [M + H<sup>+</sup> - H<sub>2</sub>O] 379.2663, found 379.2665.

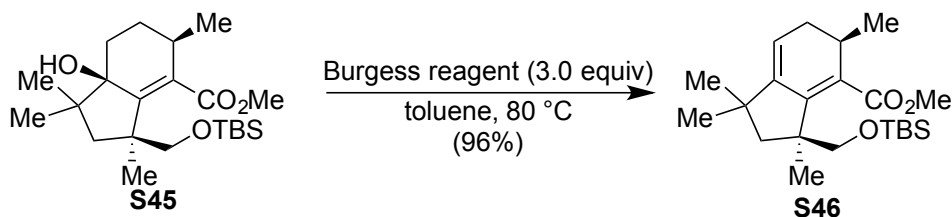

**Diene S46.** To a solution of allylic alcohol **S45** (0.070 g, 0.180 mmol, 1.0 equiv) in toluene (8 mL) at 23 °C was added the Burgess reagent (0.120 g, 0.500 mmol, 3.0 equiv). The resultant flask was then immersed in a pre-heated oil bath at 80 °C and stirring of the mixture was continued at 80 °C for 12 h. Upon completion, the reaction contents were cooled to 23 °C, diluted with Et<sub>2</sub>O (10 mL), and poured into a separatory funnel. This organic layer was washed with saturated aqueous NaHCO<sub>3</sub> (10 mL) and brine (10 mL). The organic phase was then dried (Na<sub>2</sub>SO<sub>4</sub>) and concentrated. The resultant residue was purified by flash column chromatography

(silica gel, hexanes:EtOAc, 10:1) to provide diene **S46** (0.064 g, 96% yield) as a pale yellow oil. **S46**:  $R_f = 0.62$  (silica gel, hexanes: EtOAc = 10:1);  $[\alpha]_D^{20} = +28^\circ$  ( $c = 1.0$  in  $\text{CHCl}_3$ ); IR (film)  $\nu_{\text{max}}$  2955, 2928, 2859, 1711, 1463, 1432, 1230, 1096, 852, 836, 775  $\text{cm}^{-1}$ ;  $^1\text{H}$  NMR (500 MHz,  $\text{CDCl}_3$ )  $\delta$  5.59 (dd,  $J = 5.6, 3.5$  Hz, 1 H), 3.78 (d,  $J = 9.4$  Hz, 1 H), 3.74 (s, 3 H), 3.58 (d,  $J = 9.4$  Hz, 1 H), 2.67–2.62 (m, 1 H), 2.42–2.36 (m, 1 H), 2.20 (d,  $J = 13.2$  Hz, 1 H), 2.06–2.00 (m, 1 H), 1.40 (d,  $J = 13.2$  Hz, 1 H), 1.24 (s, 3 H), 1.16 (s, 3 H), 1.11 (s, 3 H), 1.04 (d,  $J = 6.9$  Hz, 1 H), 0.04 (s, 3 H), 0.02 (s, 3 H);  $^{13}\text{C}$  NMR (125 MHz,  $\text{CDCl}_3$ )  $\delta$  169.4, 151.4, 151.0, 126.0, 118.5, 67.7, 52.3, 50.69, 47.9, 38.5, 31.4, 31.3, 31.0, 30.2, 25.8, 24.1, 18.4, -5.5, -5.6; HRMS (ESI) calcd for  $\text{C}_{22}\text{H}_{39}\text{O}_3\text{Si}^+ [\text{M} + \text{H}^+]$  379.2663, found 379.2669.

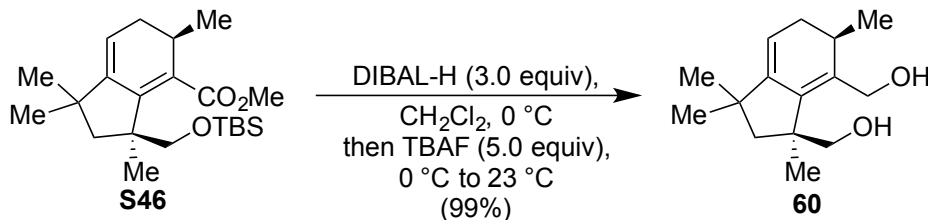

**Botrydienol (60).** To a solution of diene **S46** (37.8 mg, 0.100 mmol, 1.0 equiv) in  $\text{CH}_2\text{Cl}_2$  (0.7 mL) at  $0^\circ\text{C}$  was added DIBAL-H (0.3 mL, 1.0 M in  $\text{CH}_2\text{Cl}_2$ , 0.300 mmol, 3.0 equiv) dropwise over the course of 10 min. The resultant solution was then stirred at  $0^\circ\text{C}$  for 1 h. Next, TBAF (0.500 mL, 1.0 M in THF, 0.500 mmol, 5.0 equiv) was added dropwise over the course of 10 min. The resultant mixture was then warmed to  $23^\circ\text{C}$  and stirred at that temperature for an additional 3 h. Upon completion, the reaction contents were quenched by the slow addition of solid  $\text{Na}_2\text{SO}_4 \cdot 10\text{H}_2\text{O}$  at  $0^\circ\text{C}$  until no further gas was released. The mixture was then filtered through Celite and the residual solids were washed with EtOAc ( $5 \times 1$  mL). The combined organic layers were washed with saturated  $\text{H}_2\text{O}$  ( $3 \times 5$  mL) and brine (5 mL) before being dried ( $\text{Na}_2\text{SO}_4$ ), filtered, and concentrated. The resultant residue was purified by flash column chromatography (silica gel, hexanes:EtOAc, 5:1→1:1) to provide botrydienol (**60**, 23.6 mg, 99% yield) as a white solid. **60**:  $R_f = 0.21$  (silica gel, hexanes: EtOAc, 3:1);  $[\alpha]_D^{20} = +53.0^\circ$  ( $c = 0.80$  in  $\text{CHCl}_3$ ); IR (film)  $\nu_{\text{max}}$  3337, 2955, 2924, 2862, 1597, 1563, 1449, 1395, 1219, 1119, 1034  $\text{cm}^{-1}$ ;  $^1\text{H}$  NMR (500 MHz,  $\text{CDCl}_3$ )  $\delta$  5.38 (dd,  $J = 5.3, 3.1$  Hz, 1 H), 4.35 (d,  $J = 11.3$  Hz, 1 H), 4.20 (d,  $J = 11.3$  Hz, 1 H), 3.65 (d,  $J = 11.1$  Hz, 1 H), 3.53 (d,  $J = 11.1$  Hz, 1 H), 2.42–2.30 (m, 2 H), 2.02 (dt,  $J = 17.1, 4.5$  Hz, 1 H), 1.95 (d,  $J = 13.2$  Hz, 1 H), 1.46 (d,  $J = 13.2$  Hz, 1 H), 1.25 (s, 3 H), 1.15 (s, 3 H), 1.10 (s, 3 H), 1.08 (d,  $J = 6.8$  Hz, 1 H);  $^{13}\text{C}$  NMR (125 MHz,  $\text{CDCl}_3$ )  $\delta$  150.3, 141.1, 134.2, 114.1, 70.4, 61.9, 53.1, 47.0, 39.7, 32.6, 31.7, 31.0, 30.7, 25.8, 18.8; HRMS (CI) calcd for  $\text{C}_{15}\text{H}_{23}\text{O}^+ [\text{M} + \text{H}^+ - \text{H}_2\text{O}]$  219.1743, found 219.1746.

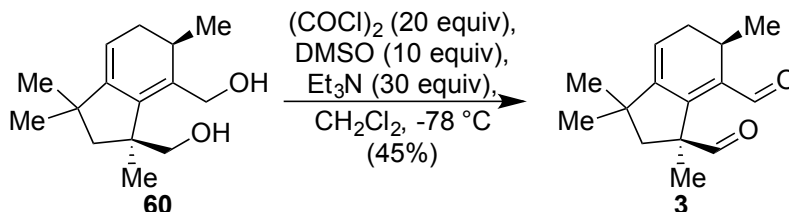

**Botrydienal (3).** To a solution of  $(\text{COCl})_2$  (0.110 mL, 1.28 mmol, 20 equiv) in  $\text{CH}_2\text{Cl}_2$  (0.5 mL) at  $-78^\circ\text{C}$  was added DMSO (0.045 mL, 0.64 mmol, 10 equiv) dropwise over the course of 5 min. After stirring the resultant solution at  $-78^\circ\text{C}$  for 15 min, a solution of

botrydienol (**60**, 15.0 mg, 0.064 mmol, 1.0 equiv) in CH<sub>2</sub>Cl<sub>2</sub> (0.5 mL) was added dropwise over the course of 10 min. The resultant solution was then stirred at -78 °C for 3 h, at which time Et<sub>3</sub>N (0.26 mL, 1.9 mmol, 30 equiv) was added the reaction contents were stirred at -78 °C for another 30 min. Upon completion, the reaction contents were quenched by the addition of H<sub>2</sub>O (2 mL), warmed to 23 °C, poured into a separatory funnel, and the resultant layers were separated. The aqueous layer was then extracted with CH<sub>2</sub>Cl<sub>2</sub> (2 × 2 mL). The combined organic layers were washed with H<sub>2</sub>O (3 mL) before being dried (Na<sub>2</sub>SO<sub>4</sub>), filtered, and concentrated. The resultant residue was purified by flash column chromatography (silica gel, hexanes:EtOAc, 10:1→5:1) to provide botrydienal (**3**, 8.2 mg, 55% yield) as a white solid. **3**: R<sub>f</sub> = 0.55 (silica gel, hexanes:EtOAc, 5:1); [α]<sub>D</sub><sup>20</sup> = +167.0° (*c* = 0.18 in *n*-hexane); lit: [α]<sub>D</sub><sup>30</sup> = +190° (*c* = 0.18 in *n*-hexane);<sup>[11]</sup> IR (film) ν<sub>max</sub> 2959, 2926, 2853, 2819, 2807, 2712, 1723, 1658, 1640, 1570, 1453, 1143, 924, 797, 404 cm<sup>-1</sup>; <sup>1</sup>H NMR (500 MHz, CDCl<sub>3</sub>) δ 9.74 (s, 1 H), 9.67 (s, 1 H), 5.88 (dd, *J* = 6.3, 2.8 Hz, 1 H), 3.00–2.97 (m, 1 H), 2.45 (ddd, *J* = 18.4, 8.7, 6.7 Hz, 1 H); 2.23 (d, *J* = 13.6 Hz, 1H), 2.20 (dd, *J* = 19.2, 6.3 Hz, 1 H); 1.63 (d, *J* = 13.7 Hz, 1 H); 1.53 (s, 3 H), 1.26 (s, 3 H), 1.06 (s, 3 H), 0.92 (d, *J* = 7.0 Hz, 1 H); <sup>13</sup>C NMR (125 MHz, CDCl<sub>3</sub>) δ 199.9, 189.8, 155.2, 149.5, 136.0, 123.7, 56.5, 50.6, 40.5, 30.62, 30.61, 28.8, 25.3, 24.2, 18.3; HRMS (ESI) calcd for C<sub>15</sub>H<sub>21</sub>O<sub>2</sub><sup>+</sup> [M + H<sup>+</sup>] 233.1536, found 233.1542.

**Table S2.** Comparison of literature and obtained spectral values for botrydienal (**3**)<sup>[11]</sup>

| <sup>1</sup> H NMR in CDCl <sub>3</sub>      |                                               |
|----------------------------------------------|-----------------------------------------------|
| Natural (Marumo, 100 MHz)                    | Synthetic (this work, 500 MHz)                |
| 9.74 (s, 1 H)                                | 9.74 (s, 1 H)                                 |
| 9.67 (s, 1 H)                                | 9.67 (s, 1 H)                                 |
| 5.87 (ddd, <i>J</i> = 6.1, 3.2, 0.5 Hz, 1 H) | 5.88 (dd, <i>J</i> = 6.3, 2.8 Hz, 1 H)        |
| 2.98 (m, 1 H)                                | 3.00–2.97 (m, 1 H)                            |
| 2.48 (ddd, <i>J</i> = 18, 8.1, 6.1 Hz, 2 H)  | 2.48 (ddd, <i>J</i> = 18.4, 8.7, 6.7 Hz, 2 H) |
| 2.24 (d, <i>J</i> = 13.9 Hz, 2 H)            | 2.24 (d, <i>J</i> = 13.6 Hz, 2 H)             |
| 1.63 (d, <i>J</i> = 13.9 Hz, 3 H)            | 1.63 (d, <i>J</i> = 13.7 Hz, 3 H)             |
| 1.54 (s, 3 H)                                | 1.53 (s, 3 H)                                 |
| 1.25 (s, 3 H)                                | 1.26 (s, 3 H)                                 |
| 1.06 (s, 3 H)                                | 1.06 (s, 3 H)                                 |
| <sup>13</sup> C NMR in CDCl <sub>3</sub>     |                                               |
| Natural (Marumo, 25 MHz)                     | Synthetic (This work, 125 MHz)                |
| 199.5                                        | 199.9                                         |
| 189.5                                        | 189.8                                         |
| 154.9                                        | 155.2                                         |
| 149.2                                        | 149.5                                         |
| 135.7                                        | 136.0                                         |
| 123.5                                        | 123.7                                         |
| 56.3                                         | 56.5                                          |
| 50.4                                         | 50.6                                          |

|      |      |
|------|------|
| 40.4 | 40.5 |
| 30.5 | 30.6 |
| 30.5 | 30.5 |
| 28.7 | 28.8 |
| 25.3 | 25.3 |
| 24.2 | 24.2 |
| 18.3 | 18.3 |

### Select Substrate Limitations for a Terminating Oxygenation

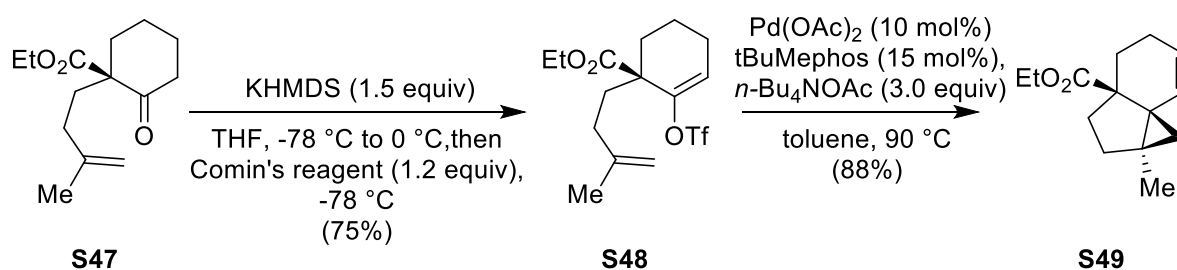

**$\beta$ -H elimination:** **S47** was prepared as a colorless oil following the described procedure toward **S42** (0.119 g, 50% yield) from ethyl 2-oxocyclohexane-1-carboxylate (0.170 g, 1.00 mmol, 1.0 equiv) and 4-iodo-2-methylbut-1-ene (0.216 g, 1.10 mmol, 1.1 equiv). **S47**:  $R_f = 0.54$  (silica gel, hexanes:EtOAc, 5:1); IR (film)  $\nu_{\text{max}}$  2939, 2866, 1714, 1450, 1214, 1187, 1134, 1094, 1022, 867  $\text{cm}^{-1}$ ;  $^1\text{H NMR}$  (500 MHz,  $\text{CDCl}_3$ )  $\delta$  4.70 (s, 1 H), 4.68 (s, 1 H), 4.21 (q,  $J = 7.1$  Hz, 2 H), 2.55–2.52 (m, 1 H), 2.47–2.44 (m, 2 H), 2.05–1.99 (m, 2 H), 1.98–1.85 (m, 2 H), 1.78–1.62 (m, 4 H), 1.72 (s, 3 H), 1.49–1.43 (m, 1 H), 1.27 (t,  $J = 7.1$  Hz, 3 H);  $^{13}\text{C NMR}$  (125 MHz,  $\text{CDCl}_3$ )  $\delta$  207.9, 171.9, 145.4, 110.0, 61.2, 60.6, 41.1, 36.1, 33.0, 32.3, 27.6, 22.6, 22.5, 14.2; HRMS (ESI) calcd for  $\text{C}_{14}\text{H}_{23}\text{O}_3^+$  [ $\text{M} + \text{H}^+$ ] 239.1642, found 239.1646. **S48** was prepared as a colorless oil following the described procedure (83.2 mg, 75% yield). **S48**:  $R_f = 0.65$  (silica gel, hexanes:EtOAc, 5:1); IR (film)  $\nu_{\text{max}}$  2941, 1734, 1416, 1248, 1210, 1145, 1032, 909  $\text{cm}^{-1}$ ;  $^1\text{H NMR}$  (500 MHz,  $\text{CDCl}_3$ )  $\delta$  5.89 (dd,  $J = 5.1, 3.1$  Hz, 1 H), 4.72 (s, 1 H), 4.69 (s, 1H), 4.25–4.17 (m, 2 H), 2.30–2.25 (m, 2 H), 2.22–2.19 (m, 1 H), 2.04–1.95 (m, 3 H), 1.88–1.83 (m, 1 H), 1.74–1.70 (m, 1 H), 1.72 (s, 2 H), 1.67–1.60 (m, 2 H), 1.29 (t,  $J = 7.1$  Hz, 3 H);  $^{13}\text{C NMR}$  (125 MHz,  $\text{CDCl}_3$ )  $\delta$  172.9, 148.3, 144.8, 120.1, 119.6, 110.6, 61.7, 50.2, 33.5, 32.3, 32.0, 24.4, 22.4, 18.8, 14.0; HRMS (ESI) calcd for  $\text{C}_{15}\text{H}_{22}\text{OSF}_3^+$  [ $\text{M} + \text{H}^+$ ] 371.1135, found 371.1147. **S49** was prepared as a colorless oil following the described standard cyclization cascade procedure (19.4 mg, 88% yield). **S49**:  $R_f = 0.56$  (silica gel, hexanes:EtOAc, 10:1); IR (film)  $\nu_{\text{max}}$  2921, 2860, 1722, 1445, 1264, 1218, 1195, 1170, 1076, 1028, 681  $\text{cm}^{-1}$ ;  $^1\text{H NMR}$  (500 MHz,  $\text{CDCl}_3$ )  $\delta$  5.75–5.72 (m, 1 H), 5.27–5.24 (m, 1 H), 4.16–4.07 (m, 2 H), 2.21–2.13 (m, 1 H), 2.10–1.99 (m, 2 H), 1.84–1.71 (m, 2 H), 1.63–1.51 (m, 3 H), 1.22 (t,  $J = 7.1$  Hz, 3 H); 1.19 (d,  $J = 5.5$  Hz, 1 H), 1.12 (s, 3 H), 0.54 (d,  $J = 5.5$  Hz, 1 H);  $^{13}\text{C NMR}$  (125 MHz,  $\text{CDCl}_3$ )  $\delta$  176.3, 128.9, 126.6, 125.1, 60.0, 52.5, 32.3, 32.3, 30.8, 27.0, 23.7, 22.3, 19.6, 14.3; HRMS (ESI)  $\text{C}_{14}\text{H}_{21}\text{O}_2^+$  [ $\text{M} + \text{H}^+$ ] 221.1536, found 221.1534.

## References

- [1] S. E. Denmark, M. Seierstad, B. Herbert, *J. Org. Chem.* **1999**, *64*, 884.
- [2] F.-D. Boyer, P.-H. Ducrot, *Eur. J. Org. Chem.* **1999**, *5*, 1201.
- [3] R. Grigg, U. Sakee, V. Sridharan, S. Sukirthalingam, R. Thangavelauthum, *Tetrahedron* **2006**, *62*, 9523.
- [4] P. Hu, S. A. Snyder, *J. Am. Chem. Soc.* **2017**, *139*, 5007.
- [5] M. N. Greco, B. E. Maryanoff, *Tetrahedron Lett.* **1992**, *33*, 5009.
- [6] J. E. Ellis, J. S. Dutcher, C. H. Heathlock, *J. Org. Chem.* **1976**, *41*, 2670.
- [7] D. Li, K. Schröder, B. Bitterlich, M. K. Tse, M. Beller, *Tetrahedron Lett.* **2008**, *49*, 5976.
- [8] D. C. Braddock, K. K. Hii, J. M. Brown, *Angew. Chem. Int. Ed.* **1998**, *37*, 1720.
- [9] K. C. Nicolaou, D. L. F. Gray, T. Montagnon, S. T. Harrison, *Angew. Chem. Int. Ed.* **2002**, *41*, 996.
- [10] (a) A. J. Colmenares, R. M. Durán-Patrón, R. Hernández-Galán, I. G. Collado, *J. Nat. Prod.* **2002**, *65*, 1724; (b) C. Qiao, W. Zhang, J.-C. Han, C.-C. Li, *Org. Lett.* **2016**, *18*, 4932.
- [11] T. Kimata, M. Natsume, S. Marumo, *Tetrahedron Lett.* **1985**, *26*, 2097.

Current Data Parameters  
 NAME dione (SM)  
 EXPNO 1  
 PROCNO 1

F2 - Acquisition Parameters  
 Date\_ 20180801  
 Time\_ 16.34  
 INSTRUM spect  
 PROBHD 5 mm PABBO BB/  
 PULPROG zg  
 TD 5998  
 SOLVENT CDC13  
 NS 7  
 DS 0  
 SWH 10000.000 Hz  
 FIDRES 0.166672 Hz  
 AQ 2.9999001 sec  
 RG 105.66  
 DW 50.000 usec  
 DE 6.50 usec  
 TE 295.9 K  
 D1 4.00000000 sec  
 TD0 1

==== CHANNEL f1 =====  
 SFO1 499.8730869 MHz  
 NUC1 1H  
 P1 3.58 usec  
 PLW1 18.25000000 W

F2 - Processing parameters  
 SI 65536  
 SF 499.8700122 MHz  
 WDW EM  
 SSB 0  
 LB 0.30 Hz  
 GB 0  
 PC 1.00

3.72  
2.56  
2.55  
2.54  
2.53  
2.52  
2.51  
2.50  
2.49  
2.48  
2.47  
2.46  
2.45  
2.44  
2.43  
2.42  
2.41  
2.40  
2.40  
2.39  
2.38  
2.37  
2.36  
2.35  
2.33  
2.33  
2.16  
2.16  
2.12  
2.11  
2.10  
2.09  
2.08  
1.89  
1.88  
1.87  
1.86  
1.86  
1.85  
1.84  
1.83  
1.82  
1.81  
1.80  
1.79  
1.78  
1.77  
1.76  
1.75  
1.74  
1.73  
1.72

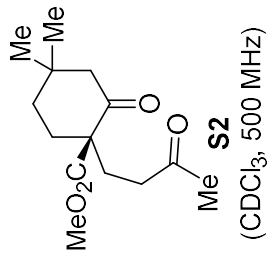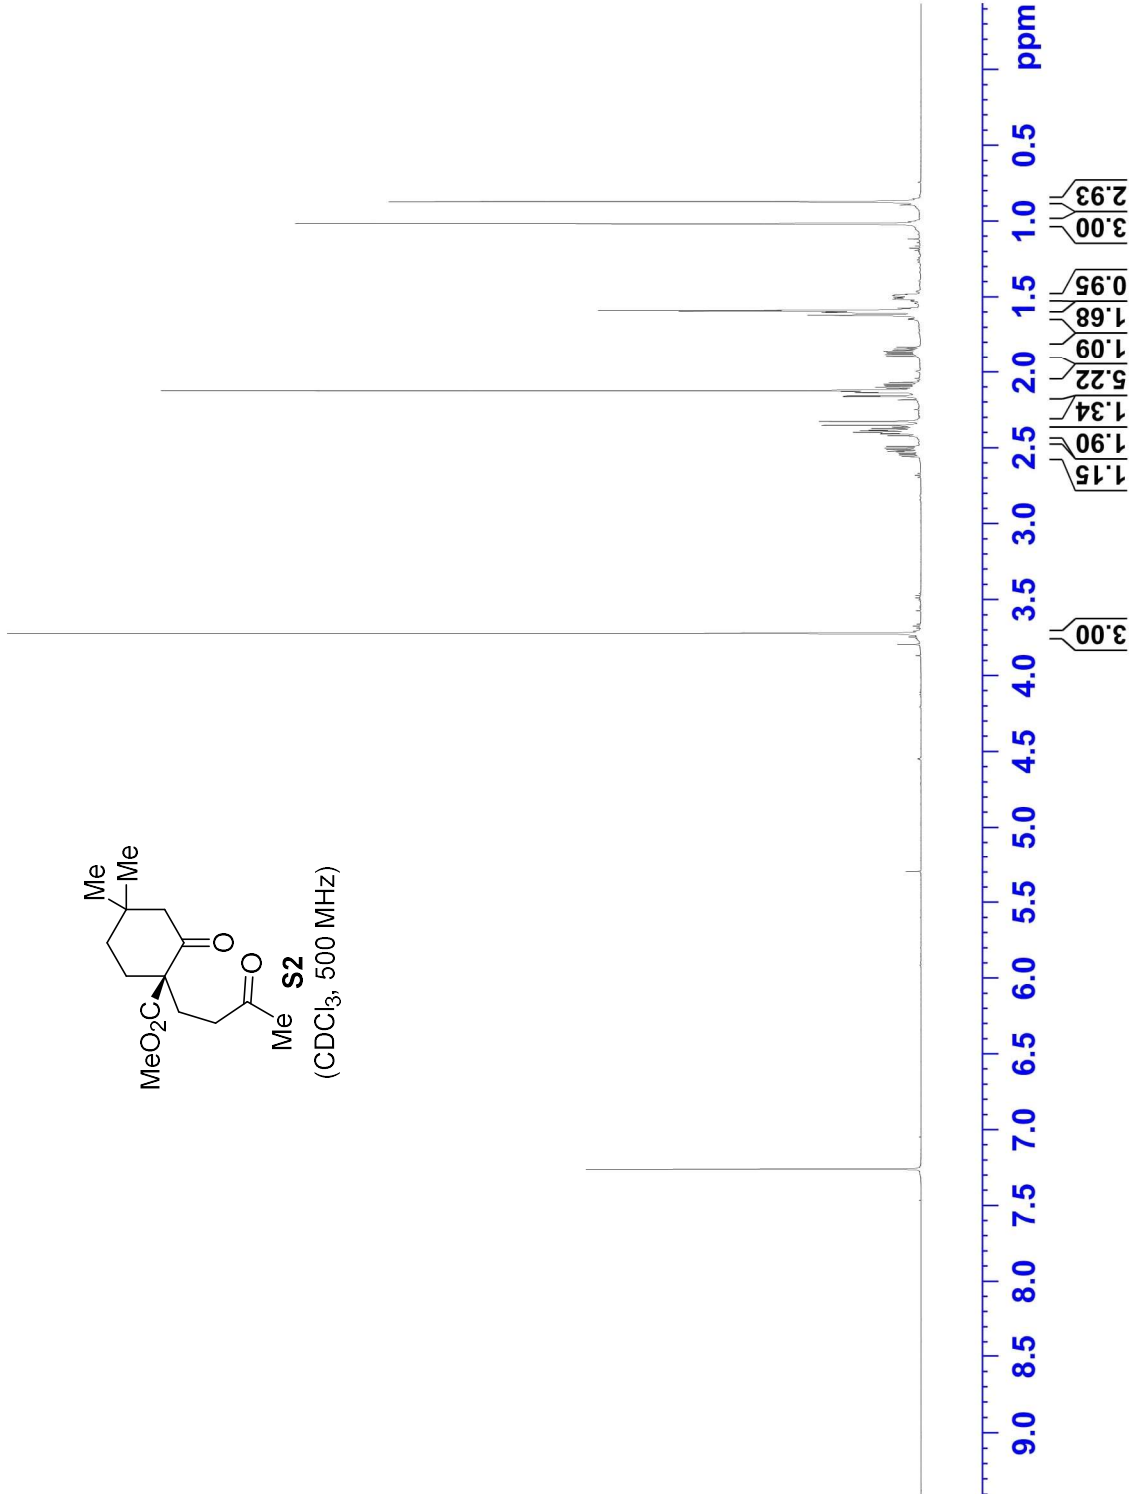

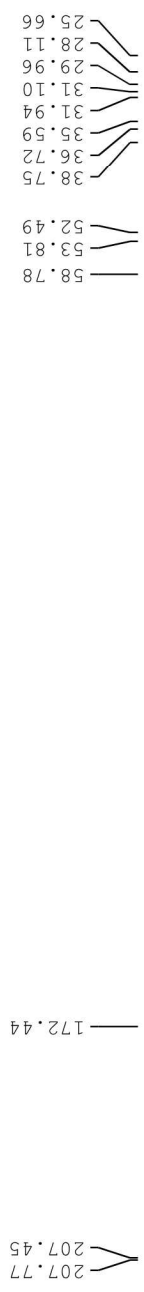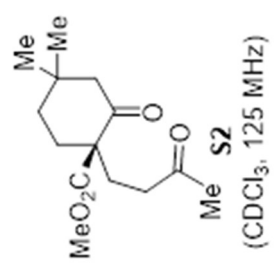

Current Data Parameters  
 NAME dione  
 EXPNO 2  
 PROCNO 2

F2 - Acquisition Parameters

Date\_ 20180801  
 Time 17.21  
 INSTRUM spect  
 PROBHD 5 mm FAQNP 1H/  
 PULPROG zgpg  
 TD 197364  
 SOLVENT CDCl3  
 NS 90  
 DS 4  
 SWH 32894.738 Hz  
 FIDRES 0.166670 Hz  
 AQ 2.9999328 sec  
 RG 2050  
 DW 15.200 usec  
 DE 6.00 usec  
 TE 294.9 K  
 D1 10.00000000 sec  
 D11 0.03000000 sec  
 TD0 1

==== CHANNEL f1 =====  
 NUC1 13C  
 P1 8.00 usec  
 PL1 1.00 dB  
 PL1W 72.42802429 W  
 SFO1 125.7716224 MHz

==== CHANNEL f2 =====  
 CPDPRG[2] waltz16  
 NUC2 1H  
 PCPD2 80.00 usec  
 PL2 0 dB  
 PL12 16.50 dB  
 PL13 17.00 dB  
 PL2W 24.54113007 W  
 PL12W 0.54940748 W  
 PL13W 0.48965994 W  
 SFO2 500.1325006 MHz

F2 - Processing parameters  
 SI 131072  
 SF 125.7577890 MHz  
 WDW EM  
 SSB 0  
 LB 0.30 Hz  
 GB 0  
 PC 1.40

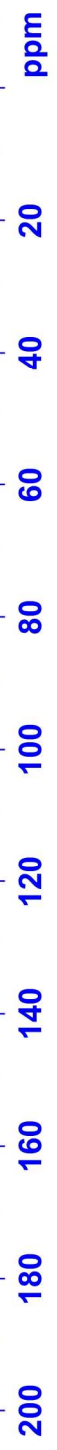



Current Data Parameters  
 NAME ketone (SM)  
 EXPNO 1  
 PROCNO 1

F2 - Acquisition Parameters  
 Date\_ 20180822  
 Time\_ 17.10  
 INSTRUM spect  
 PROBHD 5 mm PATXI 1H/  
 PULPROG zg  
 TD 59998  
 SOLVENT CDC13  
 NS 4  
 DS 0  
 SWH 10000.000 Hz  
 FIDRES 0.166672 Hz  
 AQ 2.9999001 sec  
 RG 110.37  
 DW 50.000 usec  
 DE 10.000 usec  
 TE 294.1 K  
 D1 4.00000000 sec  
 TD0 1

==== CHANNEL f1 =====  
 SFO1 500.1330885 MHz  
 NUC1 1H  
 P1 3.30 usec  
 PLW1 12.19999981 W

F2 - Processing parameters  
 SI 65536  
 SF 500.1300138 MHz  
 WDW EM  
 SSB 0  
 LB 0.30 Hz  
 GB 0  
 PC 1.00

4.70  
4.68  
4.68  
3.72  
2.48  
2.47  
2.47  
2.45  
2.45  
2.45  
2.44  
2.44  
2.33  
2.30  
2.17  
2.16  
2.14  
2.14  
2.06  
2.05  
2.05  
2.04  
2.04  
2.02  
2.02  
2.02  
1.91  
1.89  
1.87  
1.72  
1.70  
1.69  
1.69  
1.68  
1.66  
1.66  
1.66  
1.60  
1.51  
1.51  
1.51  
1.50  
1.48

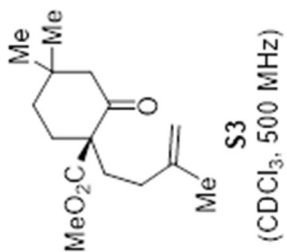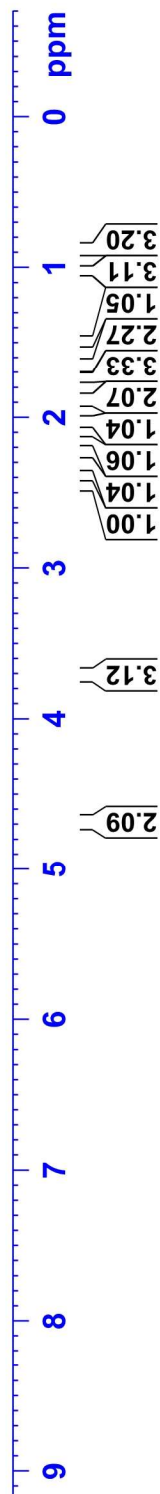

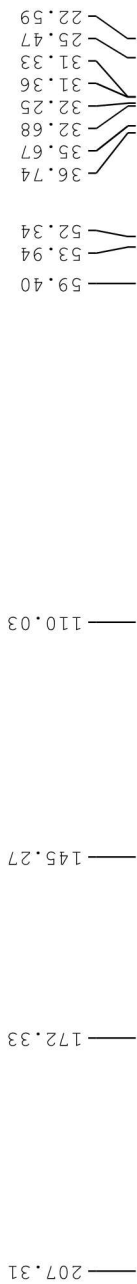

Current Data Parameters  
 NAME ketone (SM)  
 EXPNO 2  
 PROCNO 2

F2 - Acquisition Parameters  
 Date\_ 20180801  
 Time\_ 17.36  
 INSTRUM spect  
 PROBHD 5 mm PAQNP 1H/  
 PULPROG zgpg  
 TD 197364  
 SOLVENT CDCl3  
 NS 35  
 DS 4  
 SWH 32894.738 Hz  
 FIDRES 0.166670 Hz  
 AQ 2.9999328 sec  
 RG 2050  
 DW 15.200 usec  
 DE 6.00 usec  
 TE 295.0 K  
 D1 10.00000000 sec  
 D11 0.03000000 sec  
 TD0 1

==== CHANNEL f1 =====  
 NUC1 13C  
 P1 8.00 usec  
 PL1 1.00 dB  
 PL1W 72.42802429 W  
 SFO1 125.7716224 MHz

==== CHANNEL f2 =====  
 CPDPRG[2] waltz16  
 NUC2 1H  
 PCPD2 80.00 usec  
 PL2 0 dB  
 PL12 16.50 dB  
 PL13 17.00 dB  
 PL2W 24.54113007 W  
 PL12W 0.54940748 W  
 PL13W 0.48965994 W  
 SFO2 500.1325006 MHz

F2 - Processing parameters  
 SI 131072  
 SF 125.7577890 MHz  
 WDW EM  
 SSB 0  
 LB 0.30 Hz  
 GB 0  
 PC 1.40

Current Data Parameters  
 NAME OTf(SM)  
 EXPNO 1  
 PROCNO 1

F2 - Acquisition Parameters

Date 20180730  
 Time 14.32  
 INSTRUM spect  
 PROBHD 5 mm PABBO BB/  
 PULPROG zg  
 TD 59998  
 SOLVENT CDC13  
 NS 16  
 DS 0  
 SWH 10000.000 Hz  
 FIDRES 0.166672 Hz  
 AQ 2.9999001 sec  
 RG 118.99  
 DW 50.000 usec  
 DE 6.50 usec  
 TE 295.5 K  
 D1 4.00000000 sec  
 TD0 1

==== CHANNEL f1 =====  
 SFO1 499.8730869 MHz  
 NUC1 1H  
 P1 3.58 usec  
 PLW1 18.25000000 W

F2 - Processing parameters  
 SI 65536  
 SF 499.8700123 MHz  
 EM  
 WDW 0  
 SSB 0  
 LB 0.30 Hz  
 GB 0  
 PC 1.00

4.73  
 4.70  
 3.74  
 2.23  
 2.22  
 2.21  
 2.20  
 2.19  
 2.18  
 2.04  
 2.03  
 2.02  
 2.02  
 2.01  
 2.00  
 1.99  
 1.98  
 1.98  
 1.97  
 1.95  
 1.86  
 1.84  
 1.83  
 1.83  
 1.82  
 1.81  
 1.80  
 1.80  
 1.79  
 1.78  
 1.78  
 1.77  
 1.73  
 1.50  
 1.46  
 1.48

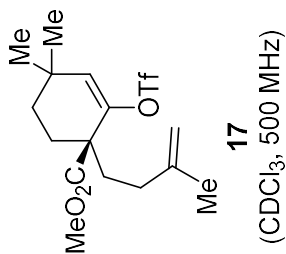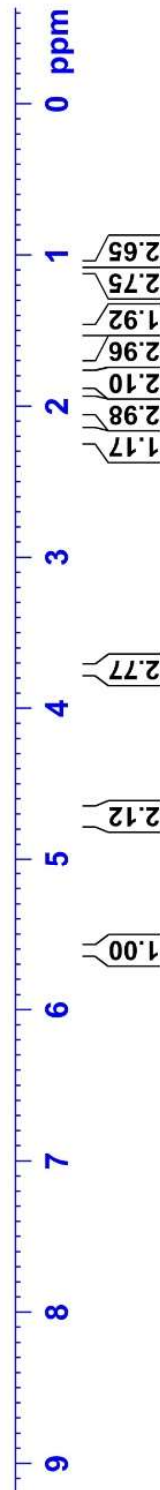

Current Data Parameters  
 NAME OTf(SM)  
 EXPNO 2  
 PROCNO 2

F2 - Acquisition Parameters  
 Date\_ 20180730  
 Time\_ 22.15  
 INSTRUM spect  
 PROBHD 5 mm PABBO BB/  
 PULPROG zgdc  
 TD 187496  
 SOLVENT CDCl3  
 NS 490  
 DS 0  
 SWH 31250.000 Hz  
 FIDRES 0.166670 Hz  
 AQ 2.9999361 sec  
 RG 2050  
 DW 16.000 usec  
 DE 6.50 usec  
 TE 297.7 K  
 D1 3.00000000 sec  
 D11 0.03000000 sec  
 TD0 1

==== CHANNEL f1 =====  
 SFO1 125.7049802 MHz  
 NUC1 13C  
 P1 10.00 usec  
 PLW1 72.83999634 W

==== CHANNEL f2 =====  
 SFO2 499.8724993 MHz  
 NUC2 1H  
 CPDPRG[2] waltz16  
 PCPD2 80.00 usec  
 PLW2 19.00000000 W  
 PLW12 0.29688001 W

F2 - Processing parameters  
 SI 1048576  
 SF 125.6924115 MHz  
 WDW EM  
 SSB 0  
 LB 0.30 Hz  
 GB 0  
 PC 1.40

52.34  
 50.22  
 33.49  
 33.46  
 33.34  
 32.28  
 29.88  
 29.09  
 27.84  
 22.33

173.15  
 146.73  
 144.70  
 129.88  
 117.03  
 110.59

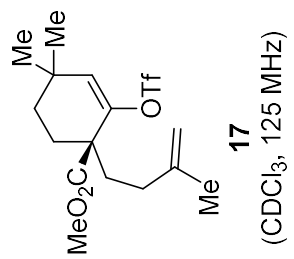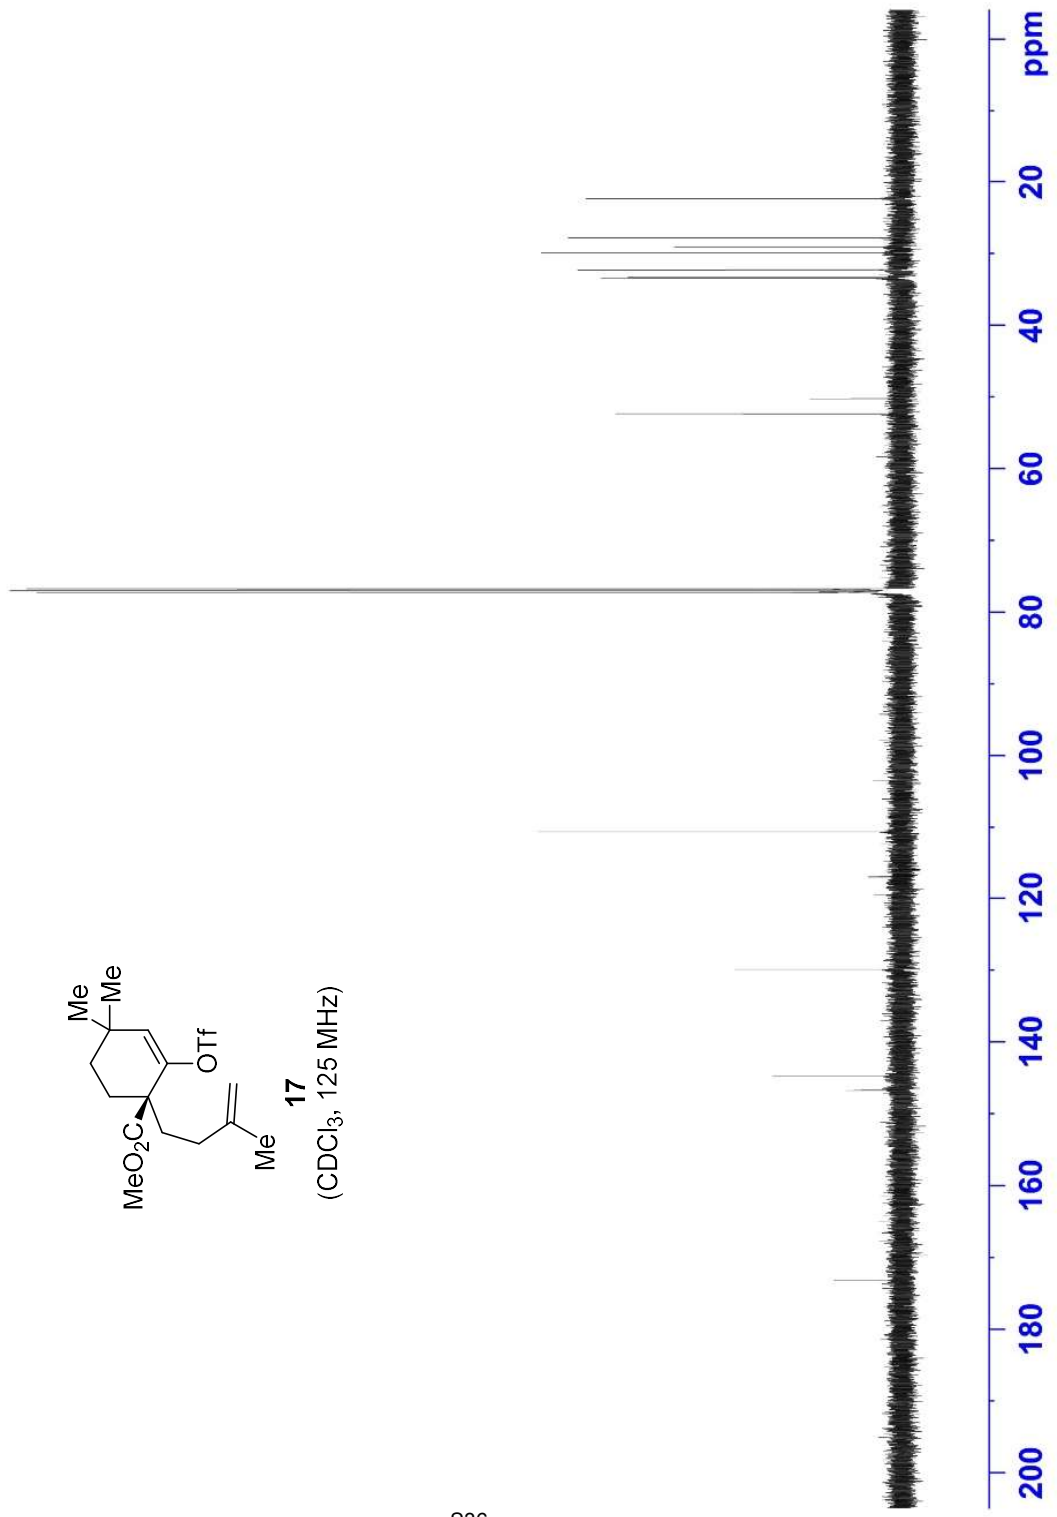

Current Data Parameters  
 NAME yh-2-160-b  
 EXPNO 1  
 PROCNO 1

F2 - Acquisition Parameters

Date\_ 20191020  
 Time\_ 18.31  
 INSTRUM spect  
 PROBHD 5 mm PATXI 1H/  
 PULPROG zg  
 TD 59998  
 SOLVENT CDCl3  
 NS 1  
 DS 0  
 SWH 10000.000 Hz  
 FIDRES 0.166672 Hz  
 AQ 2.9999001 sec  
 RG 110.37  
 DW 50.000 usec  
 DE 10.00 usec  
 TE 297.0 K  
 D1 2.00000000 sec  
 TD0 1

==== CHANNEL f1 =====  
 SFO1 500.1330885 MHz  
 NUC1 1H  
 P1 9.90 usec  
 PLW1 12.19999981 W

F2 - Processing parameters  
 SI 65536  
 SF 500.1300133 MHz  
 WDW EM  
 SSB 0  
 LB 0  
 GB 0  
 PC 1.00

4.58  
4.04  
3.70  
2.58  
2.57  
2.56  
2.55  
2.54  
2.53  
2.52  
2.45  
2.44  
2.43  
2.42  
2.41  
2.40  
2.39  
2.39  
2.39  
2.35  
2.32  
2.16  
2.15  
2.15  
2.14  
2.13  
2.13  
2.12  
2.11  
1.92  
1.91  
1.90  
1.89  
1.88  
1.87  
1.86  
1.85  
1.84  
1.83  
1.82  
1.81  
1.80  
1.79  
1.78  
1.77  
1.76  
1.75  
1.74  
1.73  
1.72  
1.71  
1.70  
1.69  
1.68  
1.67  
1.66  
1.65  
1.64  
1.63  
1.62  
1.61  
1.60  
1.59  
1.58  
1.57  
1.56  
1.55  
1.54  
1.53  
1.52  
1.51  
1.50  
1.49  
1.48  
1.47  
1.46  
1.45  
1.44  
1.43  
1.42  
1.41  
1.40  
1.39  
1.38  
1.37  
1.36  
1.35  
1.34  
1.33  
1.32  
1.31  
1.30  
1.29  
1.28  
1.27  
1.26  
1.25  
1.24  
1.23  
1.22  
1.21  
1.20  
1.19  
1.18  
1.17  
1.16  
1.15  
1.14  
1.13  
1.12  
1.11  
1.10  
1.09  
1.08  
1.07  
1.06  
1.05  
1.04  
1.03  
1.02  
1.01  
1.00  
0.99  
0.98  
0.97  
0.96  
0.95  
0.94  
0.93  
0.92  
0.91  
0.90  
0.89  
0.88  
0.87  
0.86  
0.85  
0.84  
0.83  
0.82  
0.81  
0.80  
0.79  
0.78  
0.77  
0.76  
0.75  
0.74  
0.73  
0.72  
0.71  
0.70  
0.69  
0.68  
0.67  
0.66  
0.65  
0.64  
0.63  
0.62  
0.61  
0.60  
0.59  
0.58  
0.57  
0.56  
0.55  
0.54  
0.53  
0.52  
0.51  
0.50  
0.49  
0.48  
0.47  
0.46  
0.45  
0.44  
0.43  
0.42  
0.41  
0.40  
0.39  
0.38  
0.37  
0.36  
0.35  
0.34  
0.33  
0.32  
0.31  
0.30  
0.29  
0.28  
0.27  
0.26  
0.25  
0.24  
0.23  
0.22  
0.21  
0.20  
0.19  
0.18  
0.17  
0.16  
0.15  
0.14  
0.13  
0.12  
0.11  
0.10  
0.09  
0.08  
0.07  
0.06  
0.05  
0.04  
0.03  
0.02  
0.01  
0.00

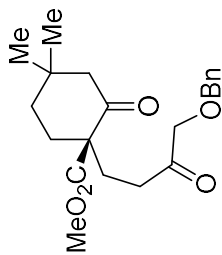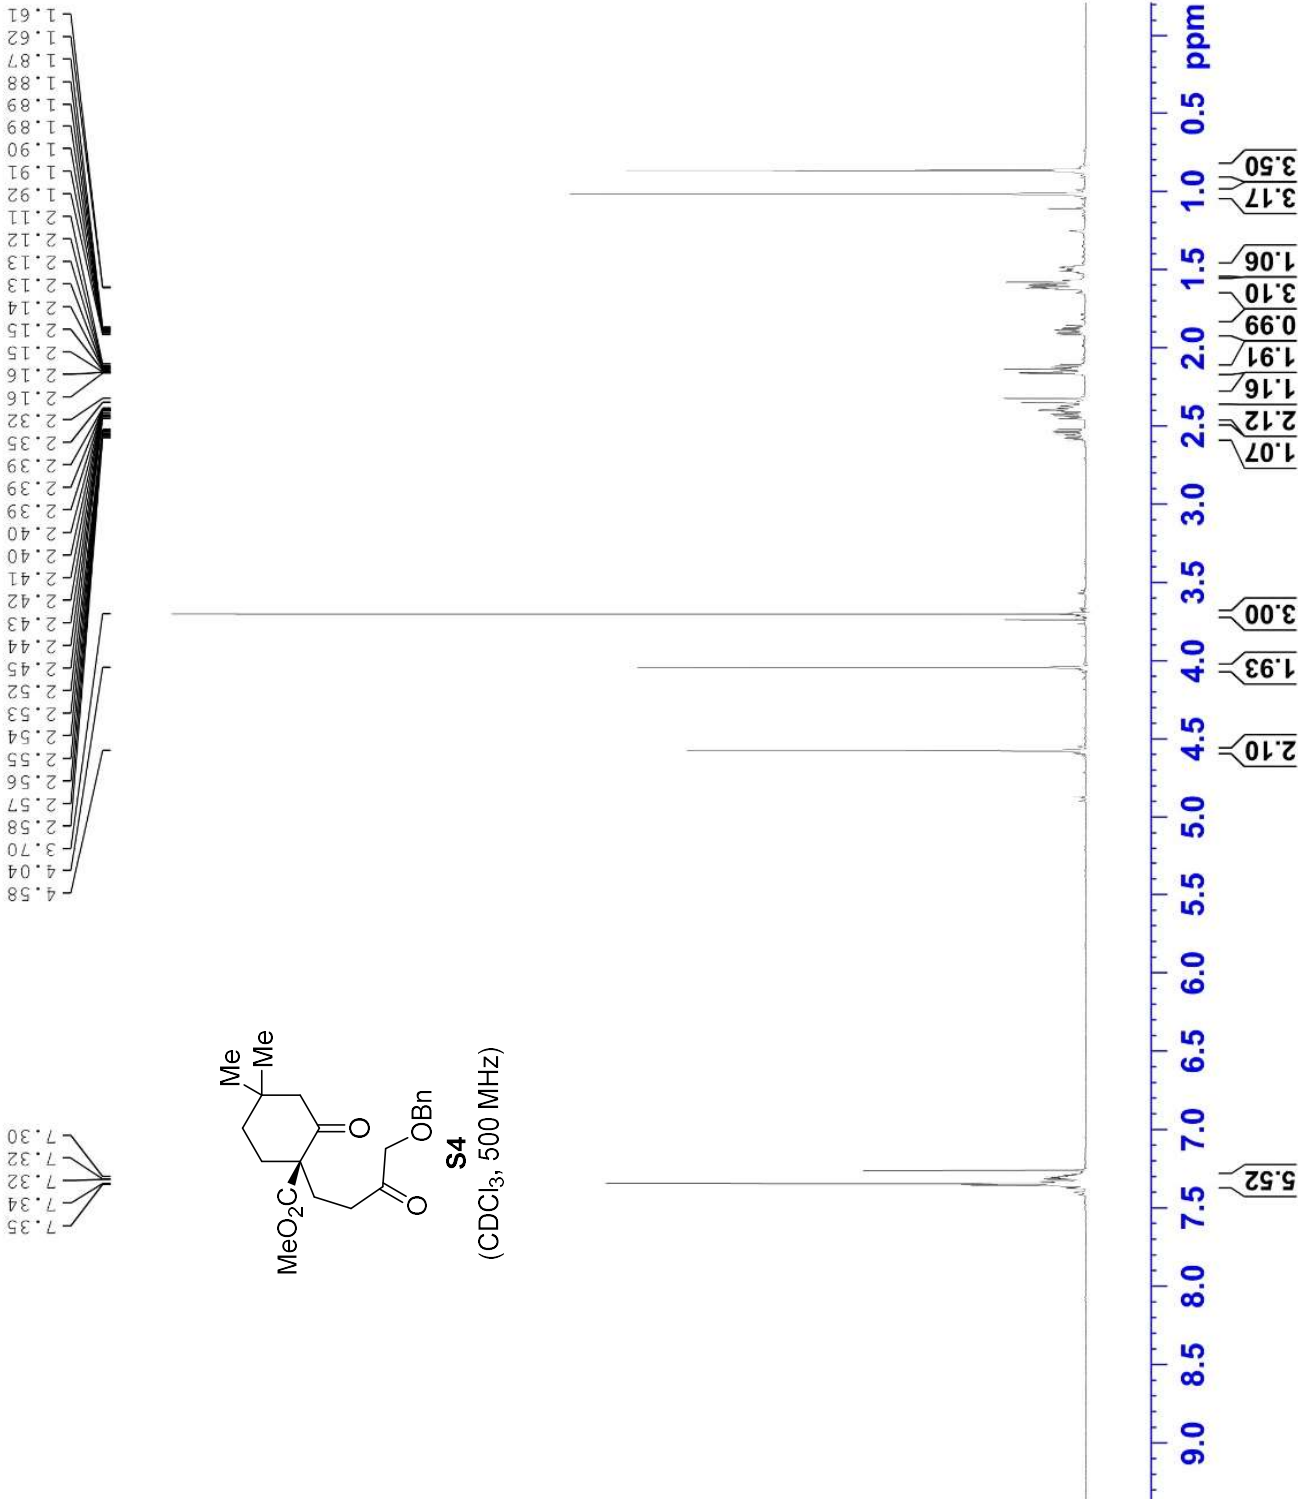

Current Data Parameters  
 NAME yh-2-160-a  
 EXPNO 2  
 PROCNO 2

F2 - Acquisition Parameters

Date\_ 20180802  
 Time\_ 15.50  
 INSTRUM spect  
 PROBHD 5 mm PABBO BB/  
 PULPROG zgdc  
 TD 187496  
 SOLVENT CDC13  
 NS 87  
 DS 0  
 SWH 31250.000 Hz  
 FIDRES 0.166670 Hz  
 AQ 2.9999361 sec  
 RG 2050  
 DW 16.000 usec  
 DE 6.50 usec  
 TE 296.6 K  
 D1 3.00000000 sec  
 D11 0.03000000 sec  
 TD0 1

==== CHANNEL f1 =====  
 SFO1 125.7049802 MHz  
 NUC1 13C  
 P1 10.00 usec  
 PLW1 72.83999634 W

==== CHANNEL f2 =====  
 SFO2 499.8724993 MHz  
 NUC2 1H  
 CPDPRG[2] waltz16  
 PCPD2 80.00 usec  
 PLW2 19.00000000 W  
 PLW12 0.29688001 W

F2 - Processing parameters

SI 1048576  
 SF 125.6924115 MHz  
 WDW EM  
 SSB 0  
 LB 0.30 Hz  
 GB 0  
 PC 1.40

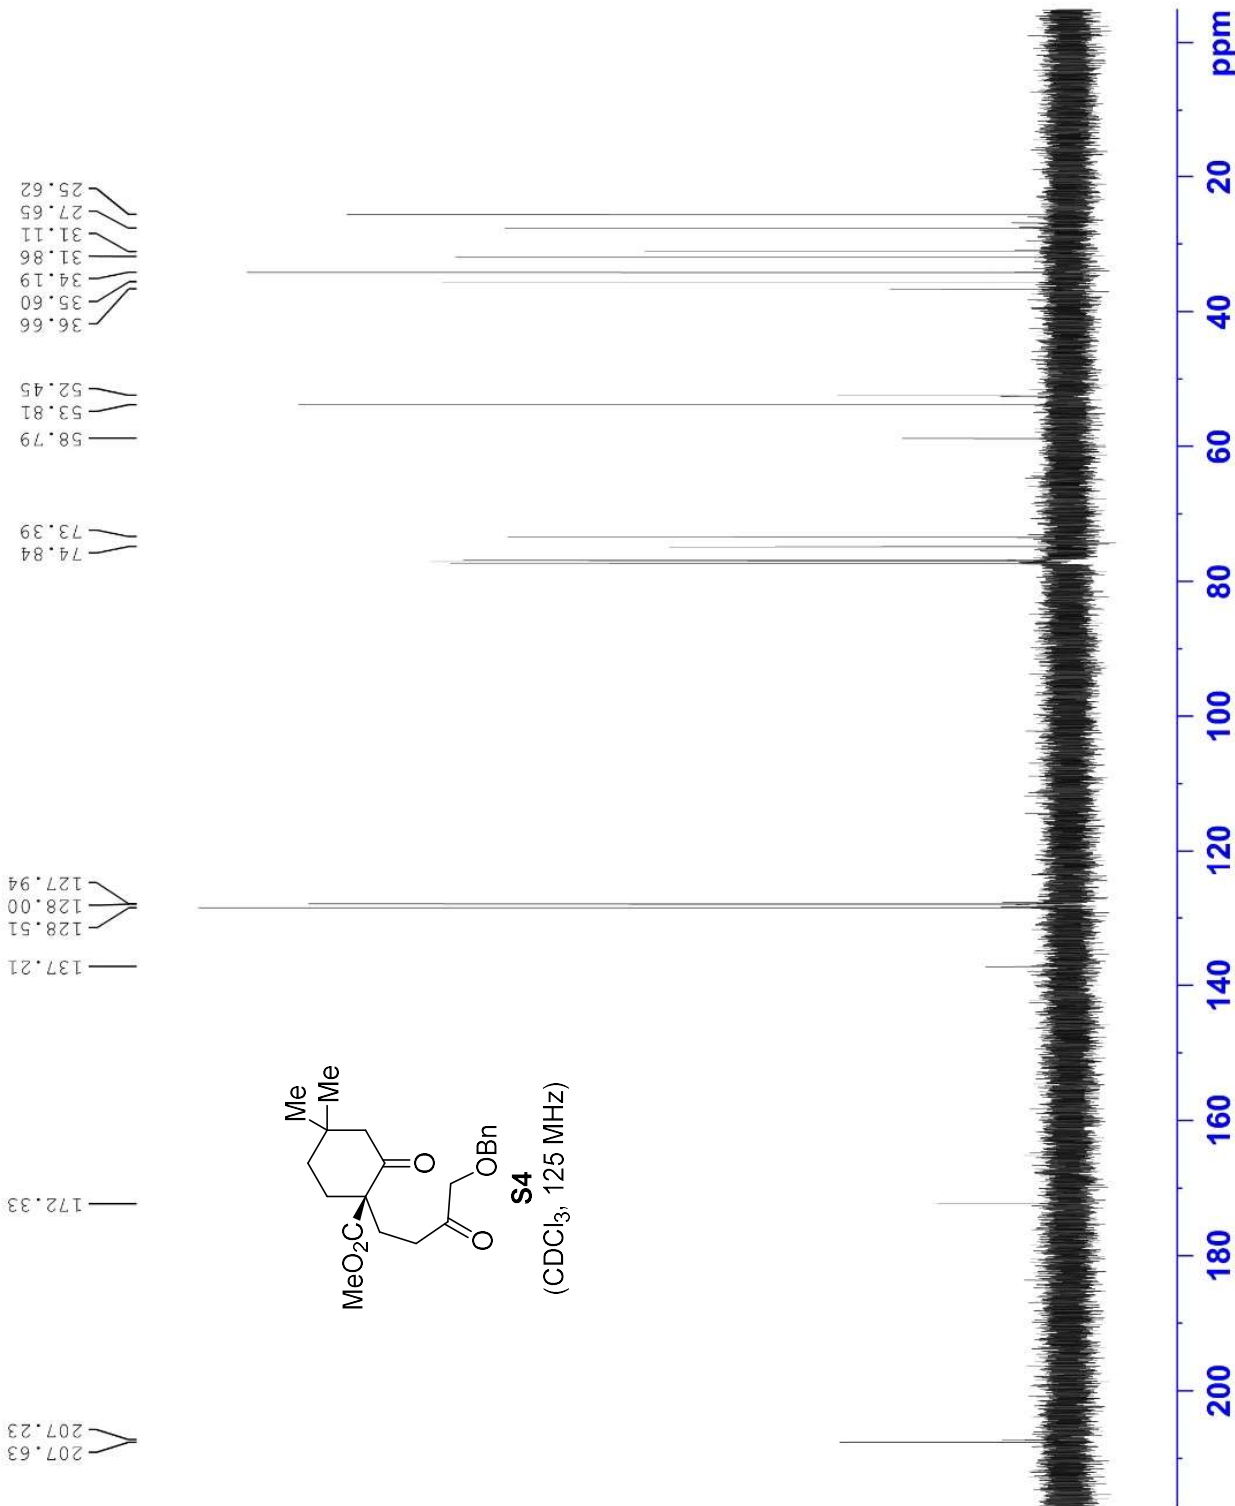

Current Data Parameters  
 NAME yh-3-1-b  
 EXPNO 1  
 PROCNO 1

F2 - Acquisition Parameters

Date\_ 20191020  
 Time\_ 18.37  
 INSTRUM spect  
 PROBHD 5 mm PATXI 1H/  
 PULPROG zg  
 TD 59998  
 SOLVENT CDCl3  
 NS 2  
 DS 0  
 SWH 10000.000 Hz  
 FIDRES 0.166672 Hz  
 AQ 2.9999001 sec  
 RG 71.78  
 DW 50.000 usec  
 DE 10.00 usec  
 TE 296.9 K  
 D1 2.0000000 sec  
 TD0 1

==== CHANNEL f1 =====  
 SFO1 500.1330885 MHz  
 NUC1 1H  
 P1 9.90 usec  
 PLW1 12.19999981 W

F2 - Processing parameters  
 SI 65536  
 SF 500.1300134 MHz  
 WDW EM  
 SSB 0  
 LB 0.30 Hz  
 GB 0  
 PC 1.00

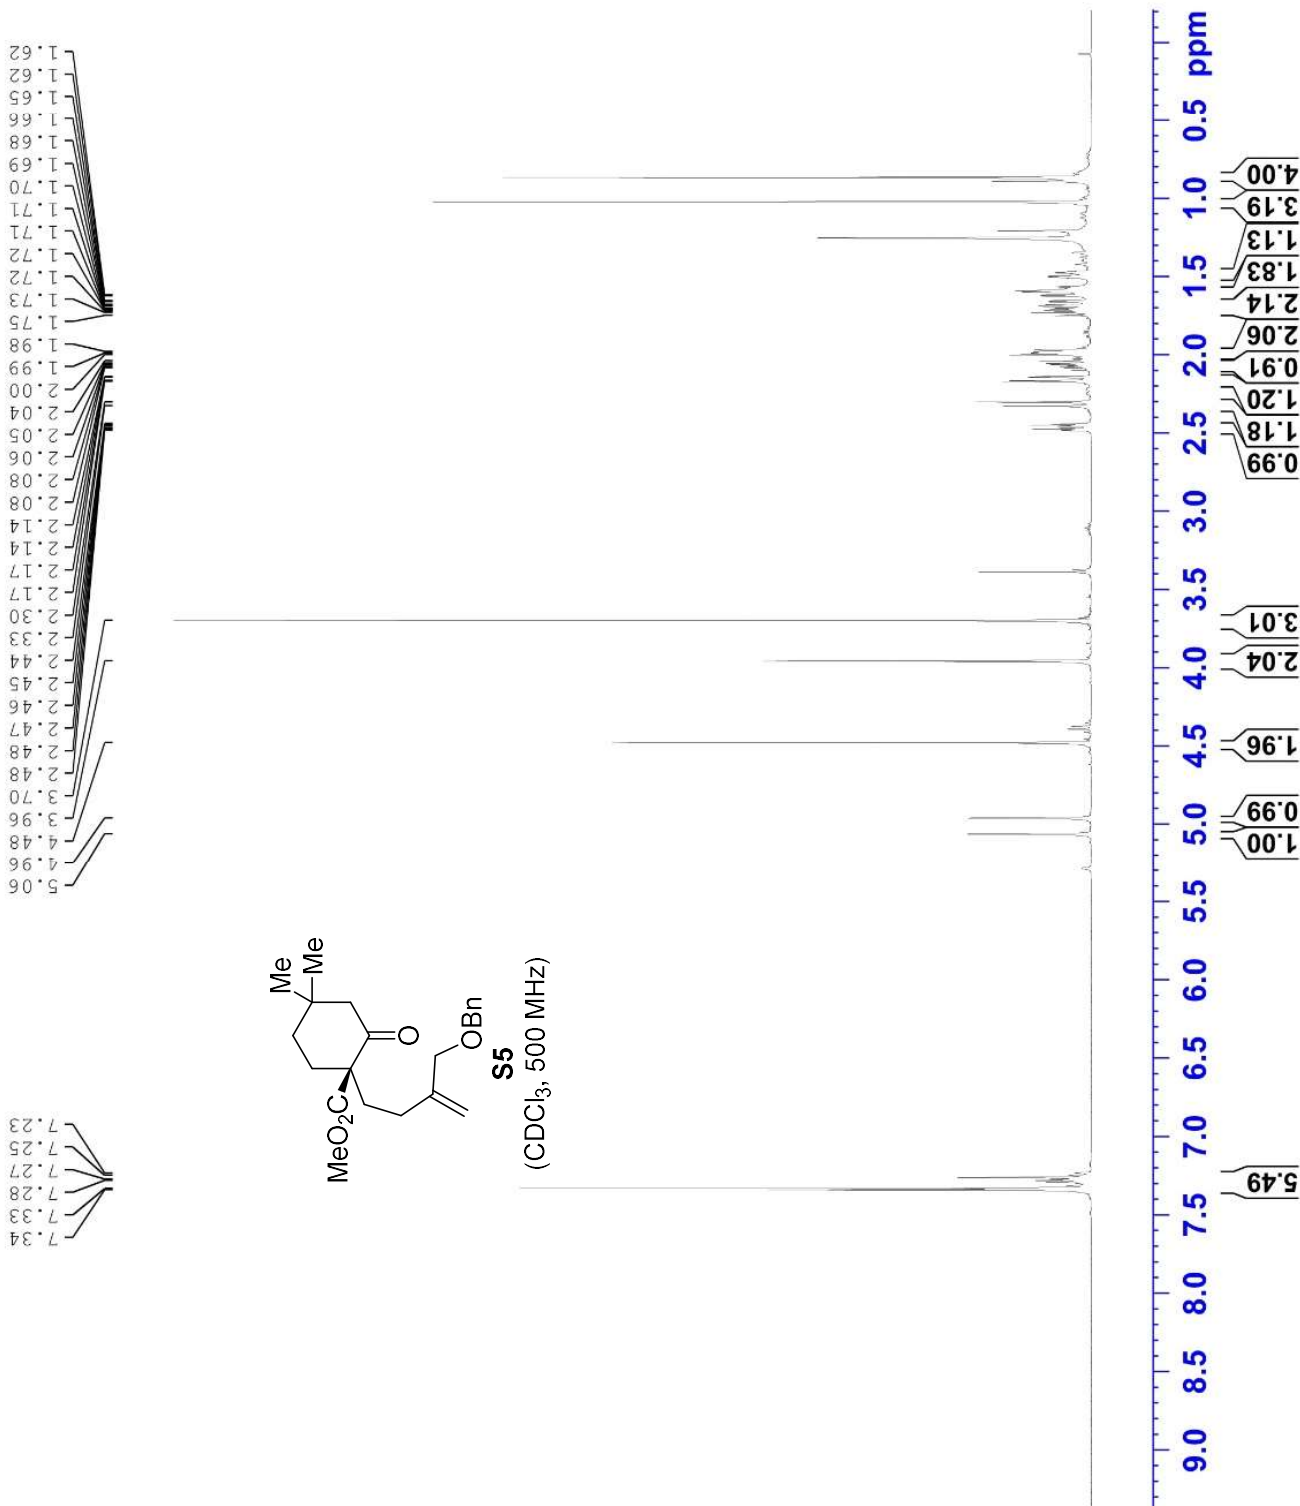

Current Data Parameters  
 NAME Yh-3-1-a  
 EXPNO 2  
 PROCNO 2

F2 - Acquisition Parameters  
 Date\_ 20180802  
 Time\_ 16.08  
 INSTRUM spect  
 PROBHD 5 mm PABBO BB/  
 PULPROG zgdc  
 TD 187496  
 SOLVENT CDCl3  
 NS 121  
 DS 0  
 SWH 31250.000 Hz  
 FIDRES 0.166670 Hz  
 AQ 2.9999361 sec  
 RG 2050  
 DW 16.000 usec  
 DE 6.50 usec  
 TE 297.0 K  
 D1 3.0000000 sec  
 D11 0.0300000 sec  
 TD0 1

==== CHANNEL f1 =====  
 SFO1 125.7049802 MHz  
 NUC1 13C  
 P1 10.00 usec  
 PLW1 72.83999634 W

==== CHANNEL f2 =====  
 SFO2 499.8724993 MHz  
 NUC2 1H  
 CPDPRG[2] waltz16  
 PCPD2 80.00 usec  
 PLW2 19.0000000 W  
 PLW12 0.29688001 W

F2 - Processing parameters  
 SI 1048576  
 SF 125.6924115 MHz  
 WDW EM  
 SSB 0  
 LB 0.30 Hz  
 GB 0  
 PC 1.40

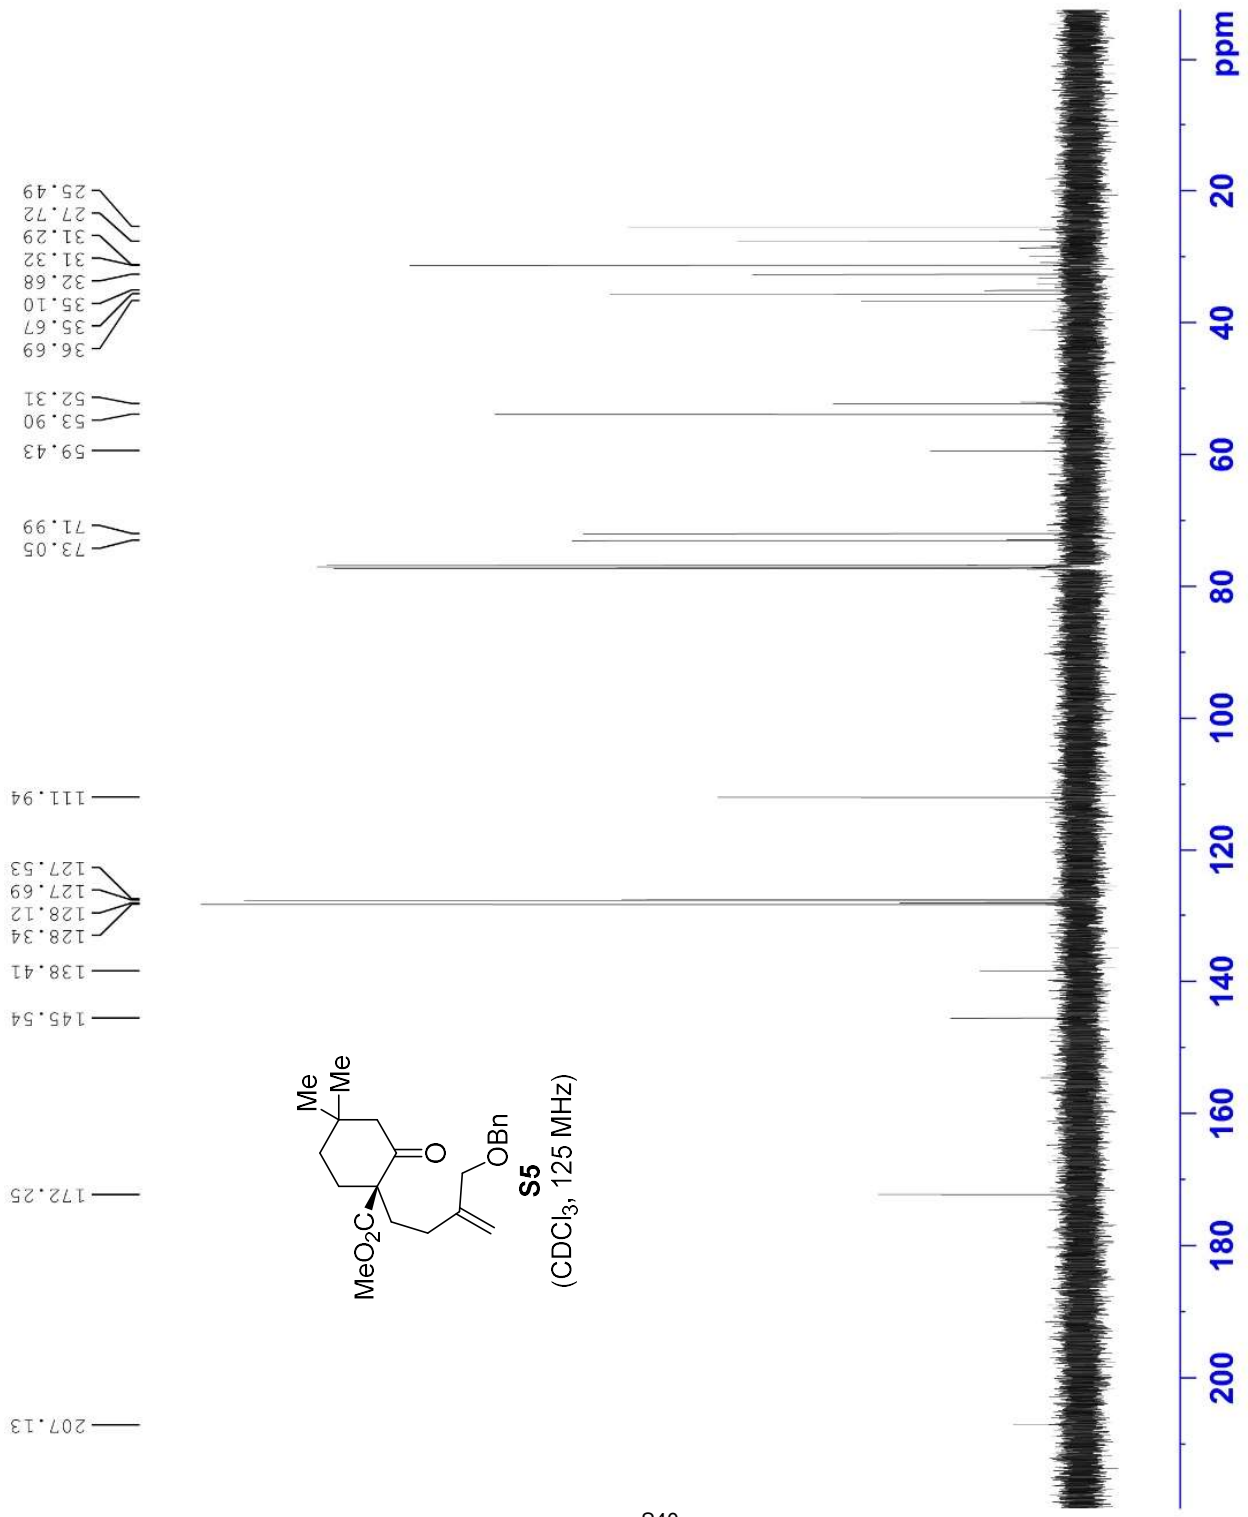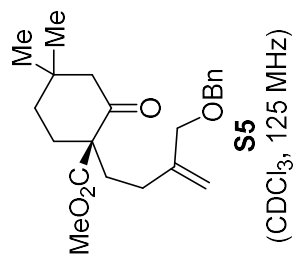



Current Data Parameters  
 NAME Yh-3-2-r  
 EXPNO 1  
 PROCNO 1

F2 - Acquisition Parameters

Date\_ 20180730  
 Time\_ 19.39  
 INSTRUM spect  
 PROBHD 5 mm PABBO BB/  
 PULPROG zg  
 TD 59998  
 SOLVENT CDCl3  
 NS 16  
 DS 0  
 SWH 10000.000 Hz  
 FIDRES 0.166672 Hz  
 AQ 2.9999001 sec  
 RG 86.16  
 DW 50.000 usec  
 DE 6.50 usec  
 TE 295.8 K  
 D1 4.0000000 sec  
 TD0 1

==== CHANNEL f1 =====  
 SFO1 499.8730869 MHz  
 NUC1 1H  
 P1 3.58 usec  
 PLW1 18.2500000 W

F2 - Processing parameters  
 SI 65536  
 SF 499.8700490 MHz  
 WDW EM  
 SSB 0  
 LB 0.30 Hz  
 GB 0  
 PC 1.00

7.27  
7.27  
7.26  
7.22  
7.22  
7.21  
7.21  
7.21  
7.21  
7.21  
7.20  
5.55  
5.00  
4.89  
4.41  
3.89  
3.88  
3.65  
2.15  
2.14  
2.13  
2.12  
2.12  
2.11  
2.11  
2.03  
2.01  
2.00  
1.99  
1.97  
1.82  
1.80  
1.79  
1.78  
1.73  
1.72  
1.71  
1.71  
1.70  
1.70  
1.69  
1.67  
1.44  
1.43  
1.43  
1.42  
1.41  
1.41

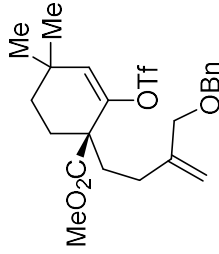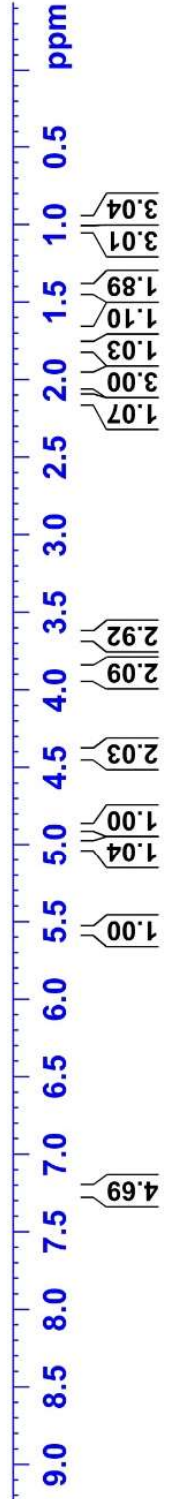

Current Data Parameters  
 NAME yh-3-2-r  
 EXPNO 2  
 PROCNO 2

F2 - Acquisition Parameters  
 Date\_ 20180731  
 Time 21.00  
 INSTRUM spect  
 PROBHD 5 mm PAQNP 1H/  
 PULPROG zgpg  
 TD 197364  
 SOLVENT CDCl3  
 NS 61  
 DS 4  
 SWH 32894.738 Hz  
 FIDRES 0.166670 Hz  
 AQ 2.9999328 sec  
 RG 2050  
 DW 15.200 usec  
 DE 6.00 usec  
 TE 292.7 K  
 D1 10.00000000 sec  
 D11 0.03000000 sec  
 TDO 1

==== CHANNEL f1 =====  
 NUC1 13C  
 P1 8.00 usec  
 PL1 1.00 dB  
 PL1W 72.42802429 W  
 SFO1 125.7716224 MHz

==== CHANNEL f2 =====  
 CPDPRG12 waltz16  
 NUC2 1H  
 PCPD2 80.00 usec  
 PL2 0 dB  
 PL12 16.50 dB  
 PL13 17.00 dB  
 PL2W 24.54113007 W  
 PL12W 0.54940748 W  
 PL13W 0.48965994 W  
 SFO2 500.1325006 MHz

F2 - Processing parameters  
 SI 131072  
 SF 125.7577890 MHz  
 WDW EM  
 SSB 0  
 LB 0.30 Hz  
 GB 0  
 PC 1.40

173.10  
 146.67  
 145.05  
 138.28  
 130.12  
 128.39  
 127.73  
 127.61  
 122.09  
 119.56  
 117.02  
 114.48  
 112.60  
 72.98  
 71.97  
 52.42  
 50.17  
 33.49  
 33.44  
 33.31  
 29.88  
 29.04  
 27.81  
 27.62

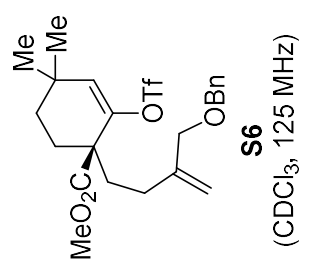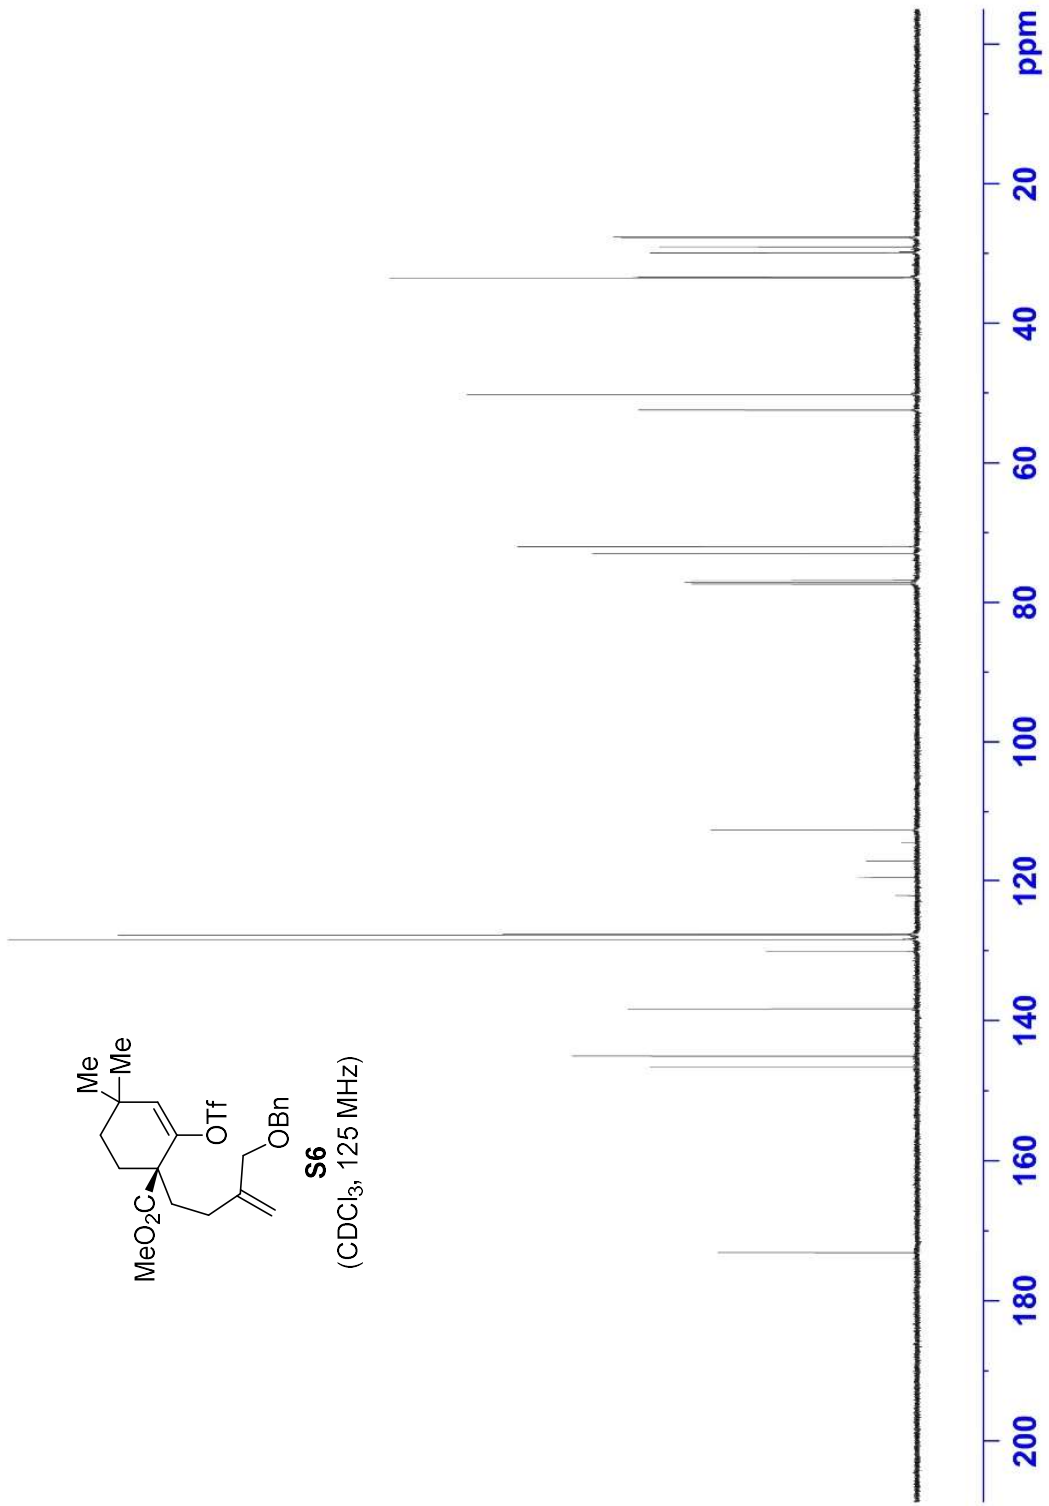

Current Data Parameters  
 NAME yh-5-17-a  
 EXPNO 1  
 PROCNO 1

F2 - Acquisition Parameters

Date\_ 20180812  
 Time\_ 20.00  
 INSTRUM spect  
 PROBHD 5 mm PATXI 1H/  
 PULPROG zg  
 TD 59998  
 SOLVENT CDCl3  
 NS 3  
 DS 0  
 SWH 10000.000 Hz  
 FIDRES 0.166672 Hz  
 AQ 2.9999001 sec  
 RG 141.13  
 DW 50.000 usec  
 DE 10.00 usec  
 TE 294.3 K  
 D1 3.00000000 sec  
 TD0 1

==== CHANNEL f1 =====  
 SFO1 500.1330885 MHz  
 NUC1 1H  
 P1 2.67 usec  
 PLW1 12.19999981 W

F2 - Processing parameters

SI 65536  
 SF 500.1300138 MHz  
 WDW EM  
 SSB 0  
 LB 0.30 Hz  
 GB 0  
 PC 1.00

4.70  
4.66  
3.72  
2.47  
2.46  
2.45  
2.44  
2.43  
2.42  
2.32  
2.29  
2.16  
2.15  
2.13  
2.13  
2.02  
2.00  
1.99  
1.89  
1.87  
1.86  
1.85  
1.84  
1.84  
1.82  
1.82  
1.69  
1.65  
1.64  
1.61  
1.61  
1.59  
1.58  
1.56  
1.55  
1.54  
1.53  
1.52  
1.51  
1.51  
1.50  
1.50

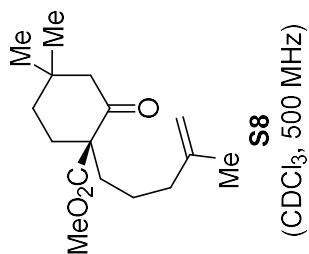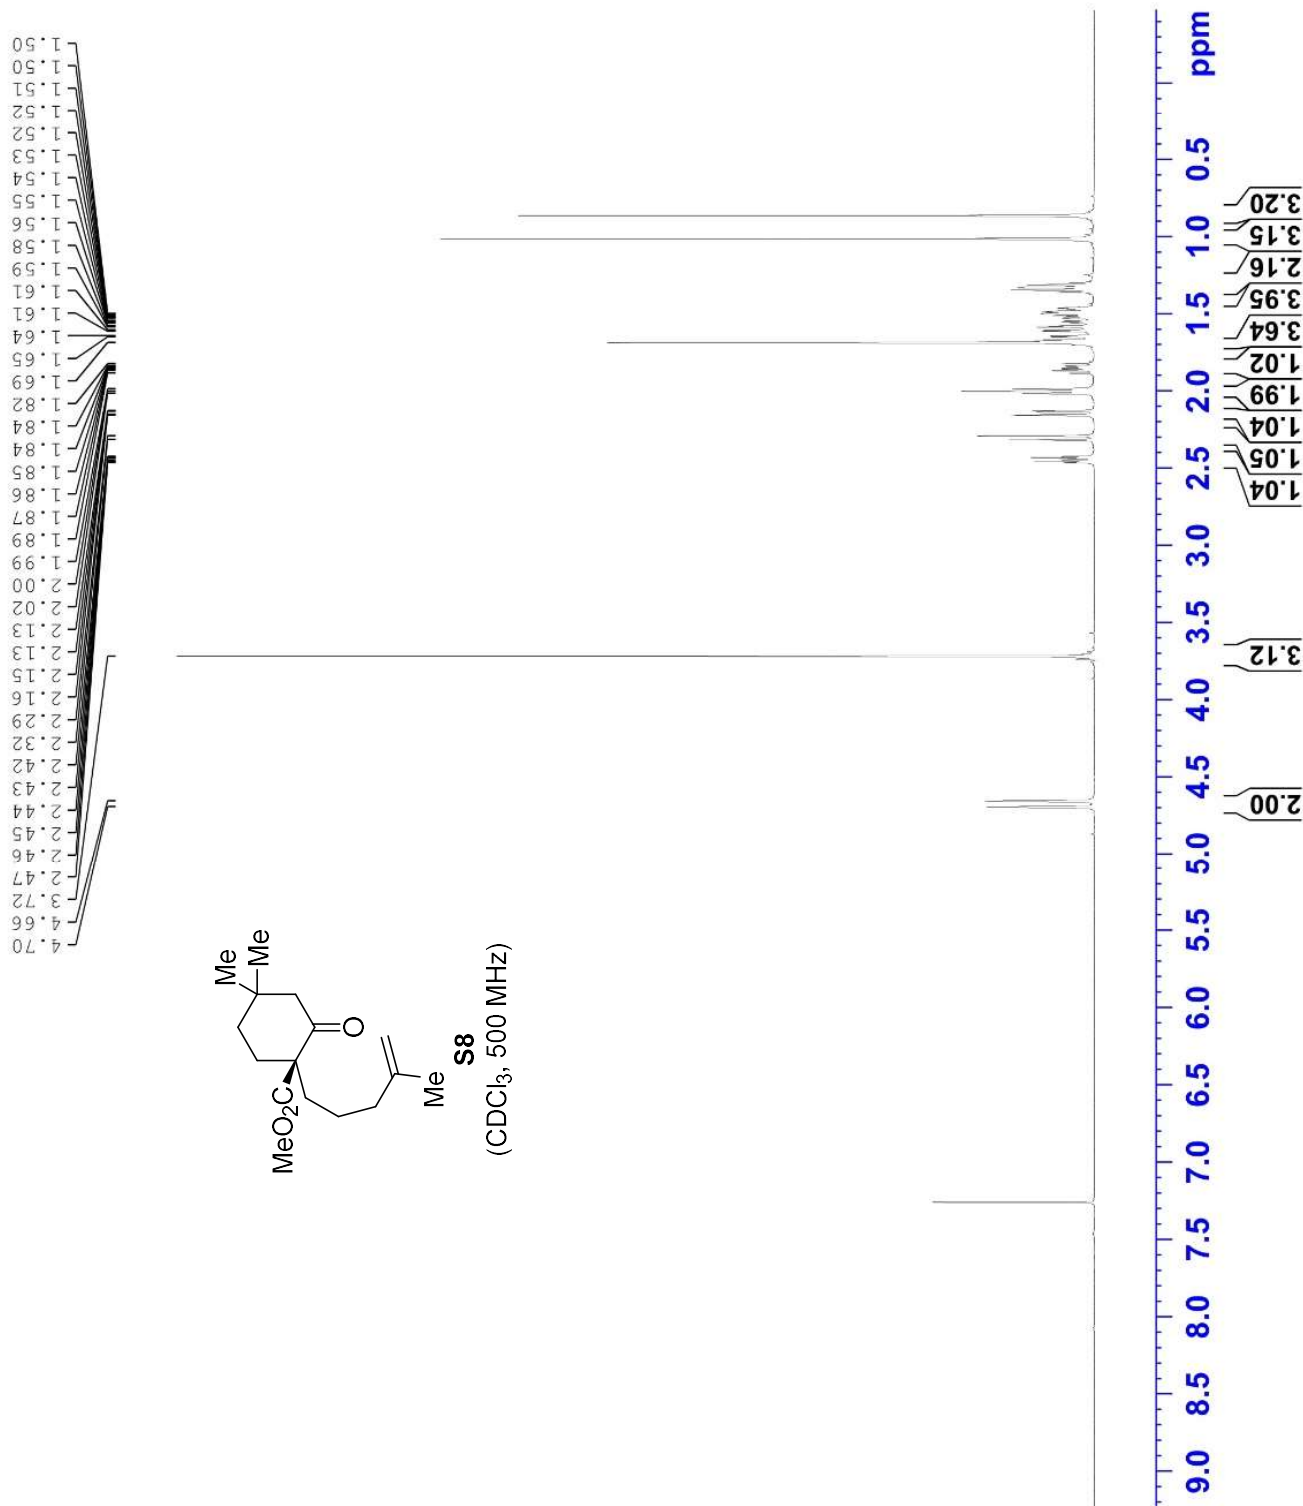

207.34  
172.49  
145.23  
110.25  
59.64  
53.93  
52.23  
37.93  
36.69  
35.71  
34.01  
31.41  
31.28  
25.51  
22.21  
22.12

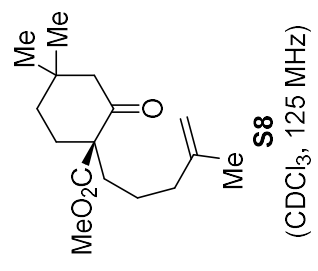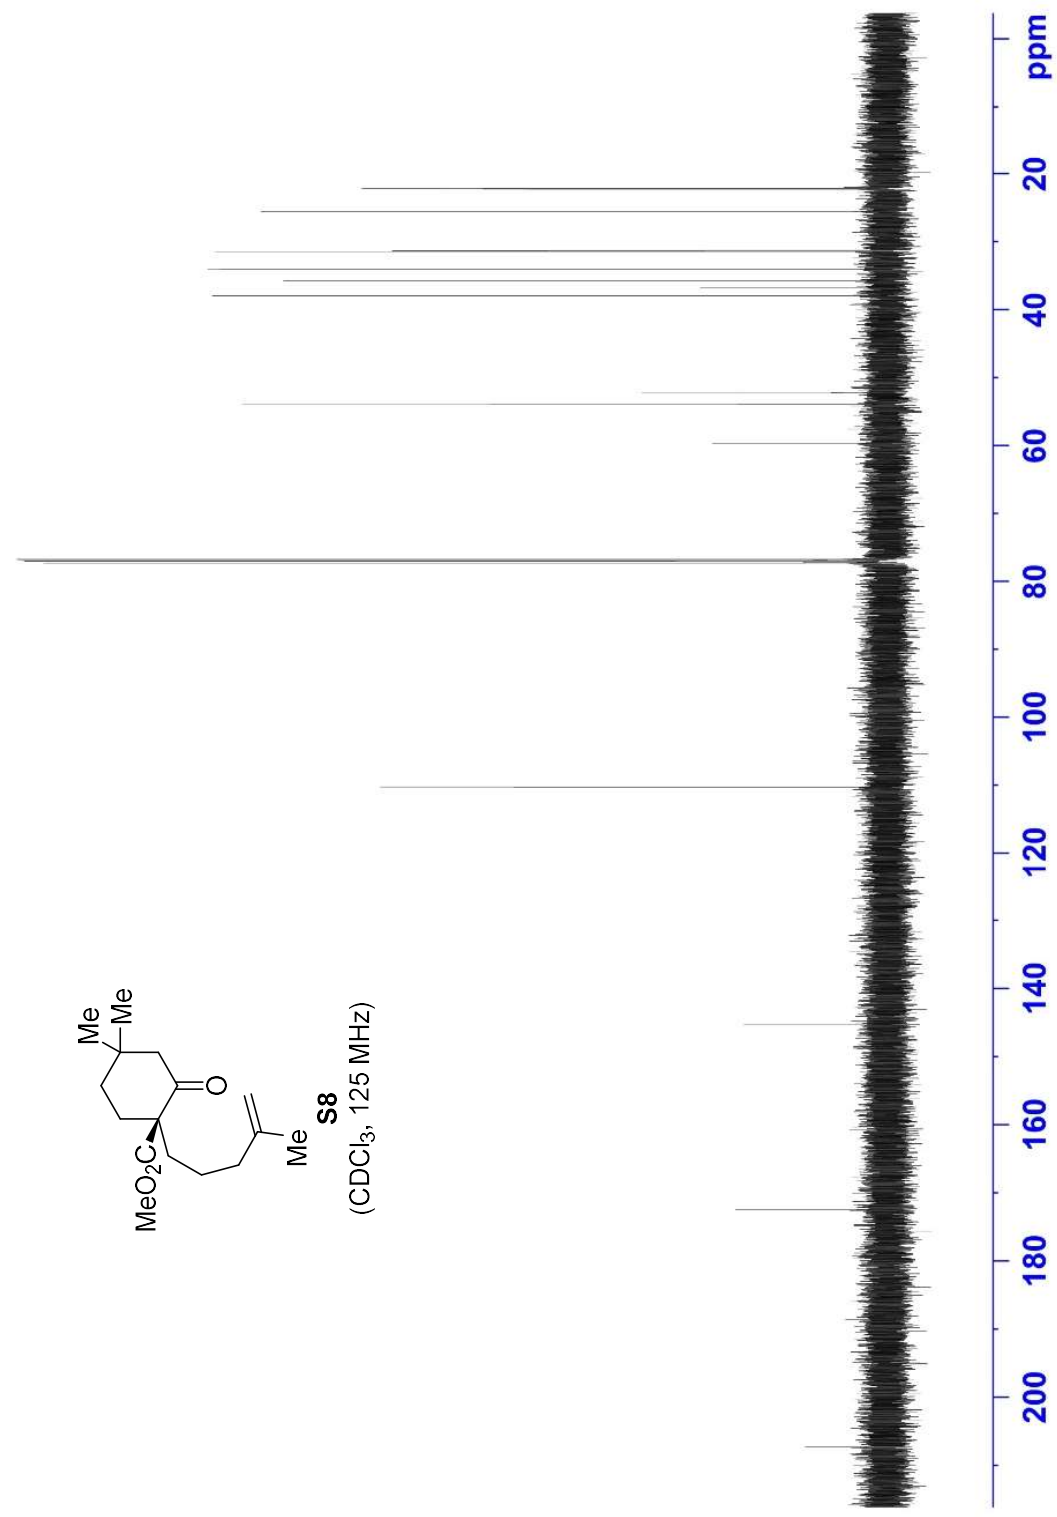

Current Data Parameters  
 NAME Yh-5-17-a  
 EXPNO 2  
 PROCNO 2

F2 - Acquisition Parameters  
 Date\_ 20180812  
 Time\_ 21.14  
 INSTRUM spect  
 PROBHD 5 mm PABBO BB/  
 PULPROG zgdc  
 TD 187496  
 SOLVENT CDC13  
 NS 153  
 DS 0  
 SWH 31250.000 Hz  
 FIDRES 0.166670 Hz  
 AQ 2.9999361 sec  
 RG 2050  
 DW 16.000 usec  
 DE 6.50 usec  
 TE 297.2 K  
 D1 3.00000000 sec  
 D11 0.03000000 sec  
 TD0 1

==== CHANNEL f1 =====  
 SFO1 125.7049802 MHz  
 NUC1 13C  
 P1 10.00 usec  
 PLW1 72.83999634 W

==== CHANNEL f2 =====  
 SFO2 499.8724993 MHz  
 NUC2 1H  
 CPDPRG|2 waltz16  
 PCPD2 80.00 usec  
 PLW2 19.00000000 W  
 PLW12 0.29688001 W

F2 - Processing parameters  
 SI 1048576  
 SF 125.6924115 MHz  
 WDW EM  
 SSB 0  
 LB 0.30 Hz  
 GB 0  
 PC 1.40

Current Data Parameters  
 NAME Yh-5-18-I  
 EXPNO 1  
 PROCNO 1

F2 - Acquisition Parameters  
 Date\_ 20180730  
 Time\_ 15.21  
 INSTRUM spect  
 PROBHD 5 mm PABBO BB/  
 PULPROG zg  
 TD 59998  
 SOLVENT CDC13  
 NS 16  
 DS 0  
 SWH 10000.000 Hz  
 FIDRES 0.166672 Hz  
 AQ 2.9999001 sec  
 RG 51.11  
 DW 50.000 usec  
 DE 6.50 usec  
 TE 295.6 K  
 D1 4.0000000 sec  
 TD0 1

==== CHANNEL f1 =====  
 SFO1 499.8730869 MHz  
 NUC1 1H  
 P1 3.58 usec  
 PLW1 18.25000000 W

F2 - Processing parameters  
 SI 65536  
 SF 499.8700129 MHz  
 EM  
 WDW 0  
 SSB 0  
 LB 0.30 Hz  
 GB 0  
 PC 1.00

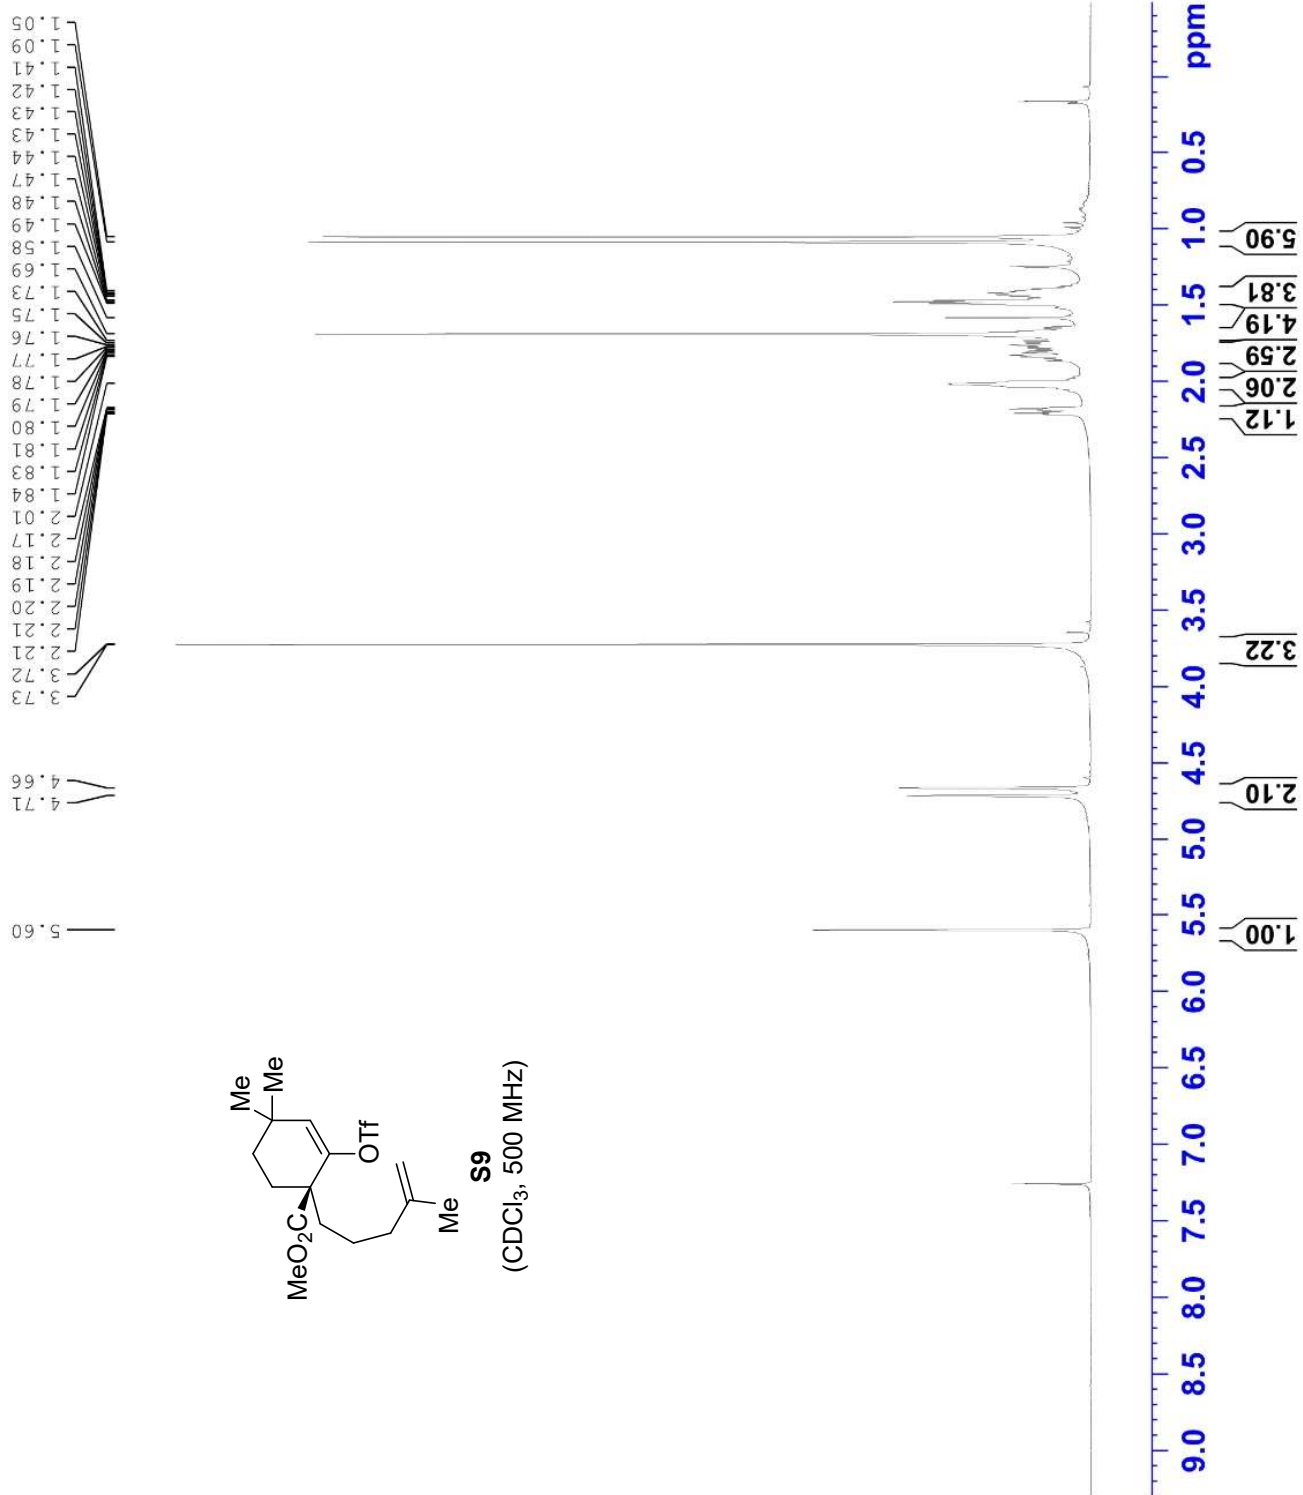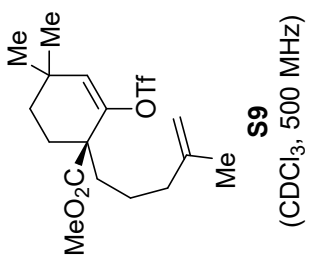

Current Data Parameters  
 NAME Yh-5-18-I  
 EXPNO 2  
 PROCNO 2

F2 - Acquisition Parameters

Date\_ 20180730  
 Time\_ 21.08  
 INSTRUM spect  
 PROBHD 5 mm PABBO BB/  
 PULPROG zgdc  
 TD 187496  
 SOLVENT CDC13  
 NS 191  
 DS 0  
 SWH 31250.000 Hz  
 FIDRES 0.166670 Hz  
 AQ 2.9999361 sec  
 RG 2050  
 DW 16.000 usec  
 DE 6.50 usec  
 TE 297.3 K  
 D1 3.00000000 sec  
 D11 0.03000000 sec  
 TD0 1

==== CHANNEL f1 =====  
 SFO1 125.7049802 MHz  
 NUC1 13C  
 P1 10.00 usec  
 PLW1 72.83999634 W

==== CHANNEL f2 =====  
 SFO2 499.8724993 MHz  
 NUC2 1H  
 CPDPRG|2 waltz16  
 PCPD2 80.00 usec  
 PLW2 19.00000000 W  
 PLW12 0.29688001 W

F2 - Processing parameters  
 SI 1048576  
 SF 125.6924115 MHz  
 WDW EM  
 SSB 0  
 LB 0.30 Hz  
 GB 0  
 PC 1.40

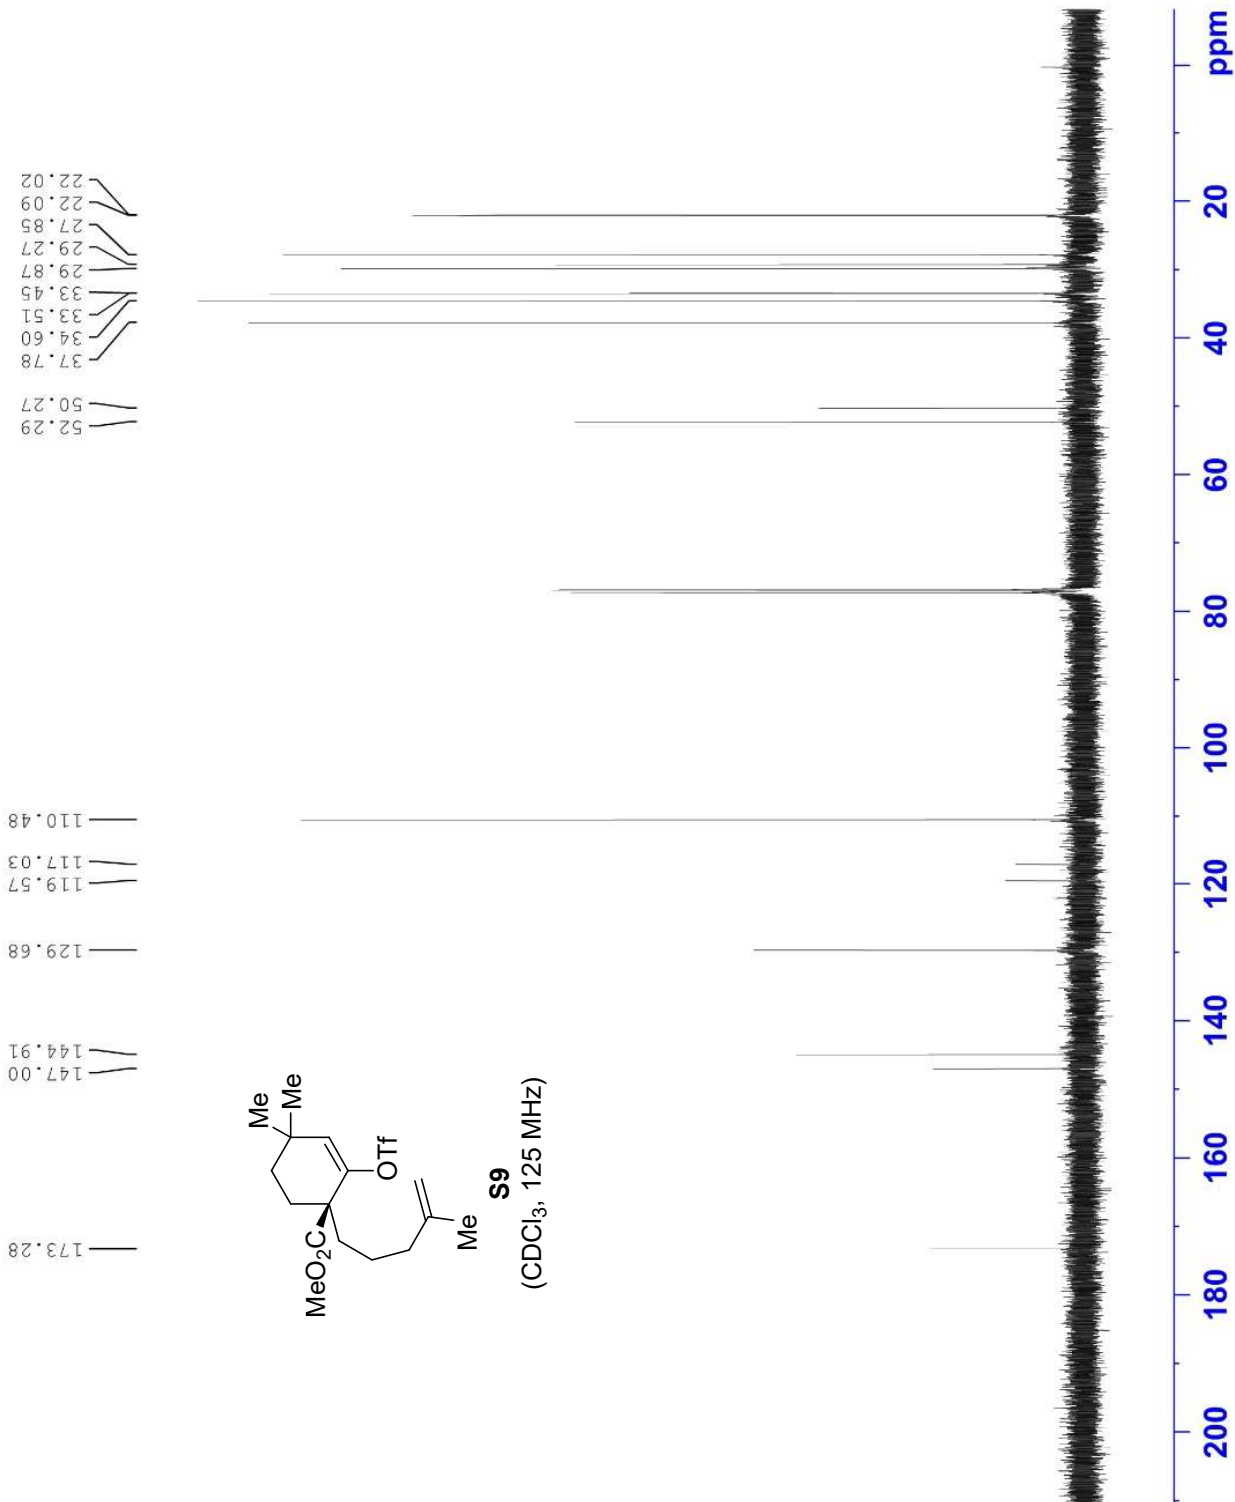

Current Data Parameters  
 NAME yh-4-1-1  
 EXPNO 1  
 PROCNO 1

F2 - Acquisition Parameters

Date 20180730  
 Time 19.46  
 INSTRUM spect  
 PROBHD 5 mm PABBO BB/  
 PULPROG zg  
 TD 59998  
 SOLVENT CDC13  
 NS 16  
 DS 0  
 SWH 10000.000 Hz  
 FIDRES 0.166672 Hz  
 AQ 2.9999001 sec  
 RG 100.96  
 DW 50.000 usec  
 DE 6.50 usec  
 TE 295.8 K  
 D1 4.0000000 sec  
 TD0 1

==== CHANNEL f1 =====  
 SFO1 499.8730869 MHz  
 NUC1 1H  
 P1 3.58 usec  
 PLW1 18.25000000 W

F2 - Processing parameters  
 SI 65536  
 SF 499.8700122 MHz  
 WDW EM  
 SSB 0  
 LB 0.30 Hz  
 GB 0  
 PC 1.00

5.73  
 4.88  
 4.88  
 4.88  
 4.88  
 4.68  
 4.68  
 4.68  
 4.68  
 4.68  
 4.67  
 2.45  
 2.44  
 2.44  
 2.44  
 2.44  
 2.43  
 2.42  
 2.31  
 2.30  
 2.30  
 2.29  
 2.29  
 2.28  
 2.13  
 2.11  
 1.99  
 1.96  
 1.95  
 1.94  
 1.94  
 1.94  
 1.93  
 1.93  
 1.92  
 1.92  
 1.78  
 1.57  
 1.57  
 1.55  
 1.54  
 1.05  
 1.04

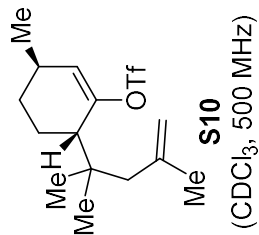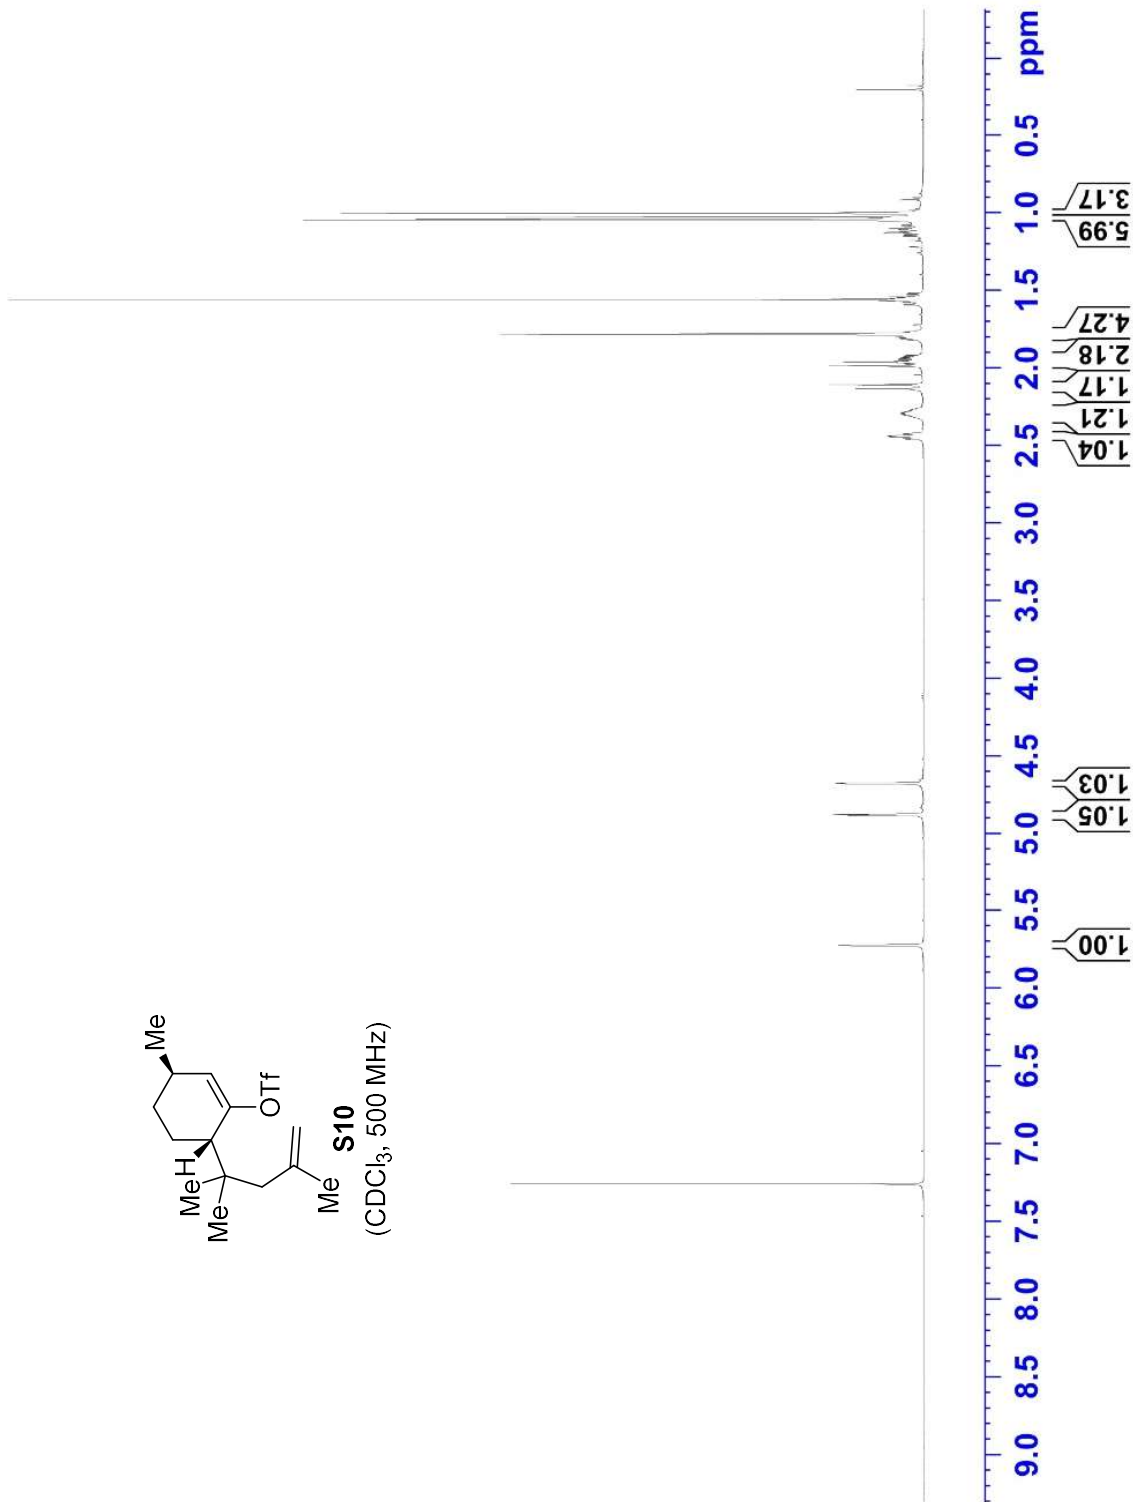

Current Data Parameters  
 NAME Yh-4-1-I  
 EXPNO 3  
 PROCNO 3

F2 - Acquisition Parameters  
 Date\_ 20180730  
 Time\_ 21.45  
 INSTRUM spect  
 PROBHD 5 mm PABBO BB/  
 PULPROG zgdc  
 TD 187496  
 SOLVENT CDC13  
 NS 306  
 DS 0  
 SWH 31250.000 Hz  
 FIDRES 0.166670 Hz  
 AQ 2.9999361 sec  
 RG 2050  
 DW 16.000 usec  
 DE 6.50 usec  
 TE 297.7 K  
 D1 3.00000000 sec  
 D11 0.03000000 sec  
 TD0 1

==== CHANNEL f1 =====  
 SFO1 125.7049802 MHz  
 NUC1 13C  
 P1 10.00 usec  
 PLW1 72.83999634 W

==== CHANNEL f2 =====  
 SFO2 499.8724993 MHz  
 NUC2 1H  
 CPDPRG|2 waltz16  
 PCPD2 80.00 usec  
 PLW2 19.00000000 W  
 PLW12 0.29688001 W

F2 - Processing parameters  
 SI 1048576  
 SF 125.6924115 MHz  
 WDW EM  
 SSB 0  
 LB 0.30 Hz  
 GB 0  
 PC 1.40

47.61  
 46.56  
 37.27  
 30.43  
 30.11  
 26.71  
 26.51  
 25.59  
 25.47  
 21.25

151.51  
 142.95  
 128.24  
 119.85  
 114.87

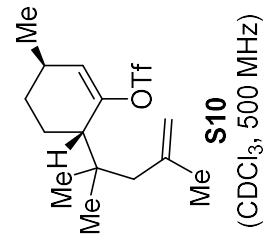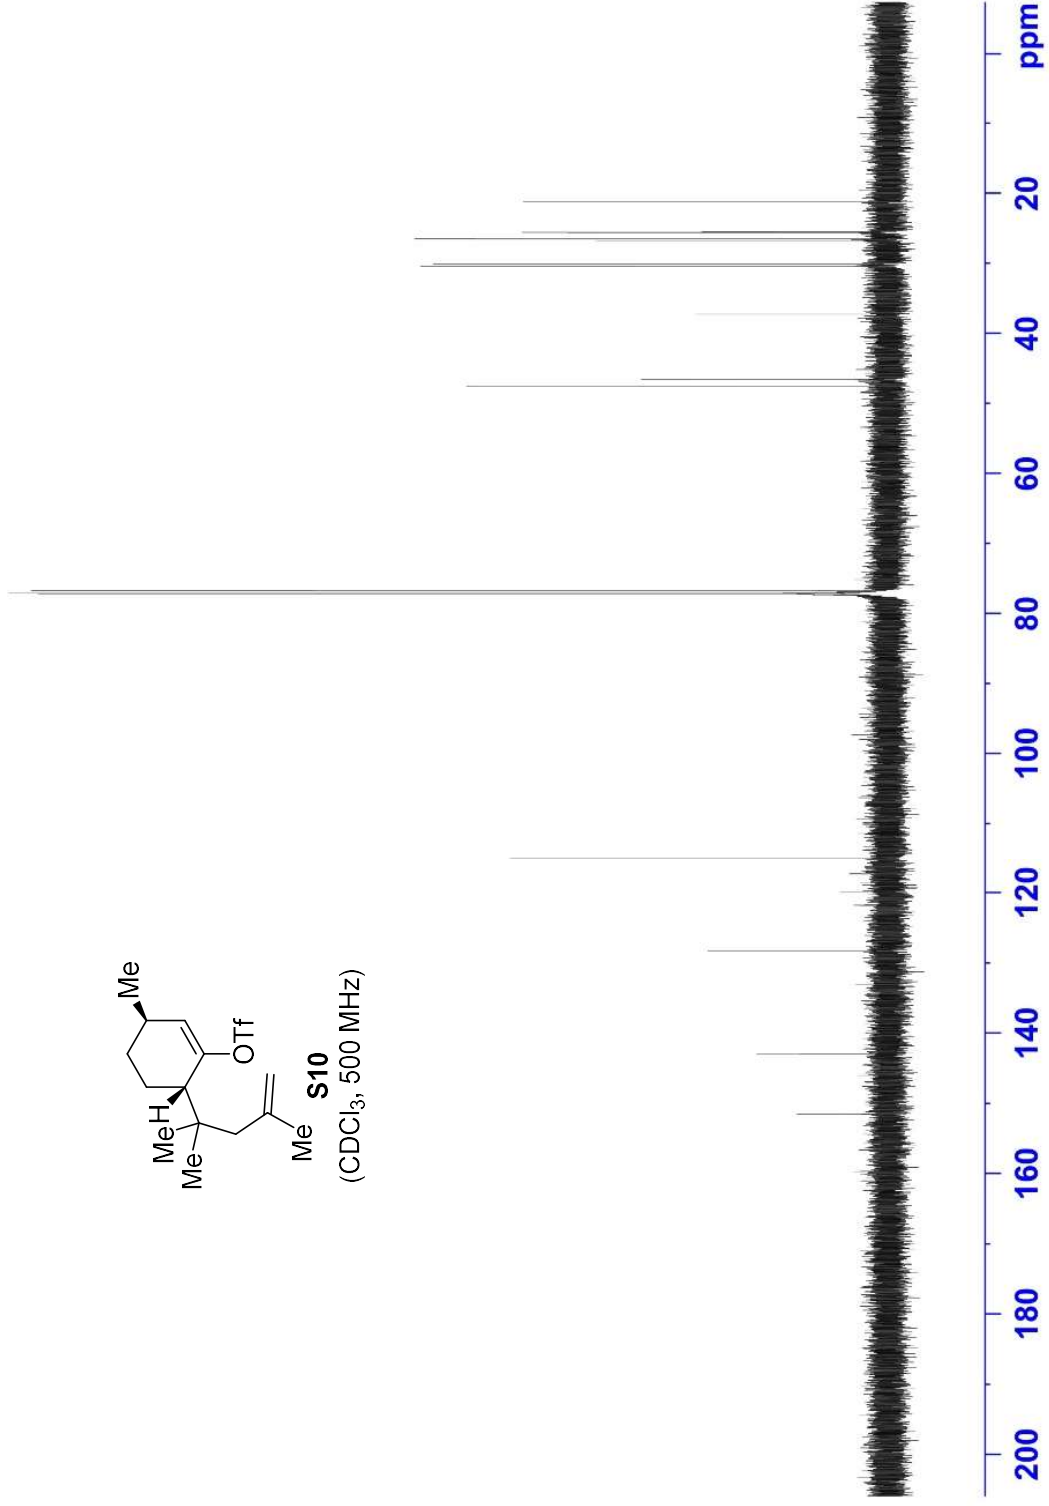



Current Data Parameters  
 NAME 5-member-ring-OTf  
 EXPNO 1  
 PROCNO 1

F2 - Acquisition Parameters  
 Date\_ 20190812  
 Time\_ 14.30  
 INSTRUM spect  
 PROBHD 5 mm PATXI 1H/  
 PULPROG zg  
 TD 59998  
 SOLVENT CDC13  
 NS 4  
 DS 0  
 SWH 10000.000 Hz  
 FIDRES 0.166672 Hz  
 AQ 2.9999001 sec  
 RG 196.79  
 DW 50.000 usec  
 DE 10.00 usec  
 TE 293.4 K  
 D1 4.00000000 sec  
 TD0 1

==== CHANNEL f1 =====  
 SFO1 500.1330885 MHz  
 NUC1 1H  
 P1 3.30 usec  
 PLW1 12.19999981 W

F2 - Processing parameters  
 SI 65536  
 SF 500.1300138 MHz  
 WDW EM  
 SSB 0  
 LB 0.30 Hz  
 GB 0  
 PC 1.00

1.14  
1.17  
1.56  
1.72  
1.73  
1.74  
1.75  
1.75  
1.76  
1.77  
1.78  
1.91  
1.92  
1.93  
1.94  
1.95  
2.04  
2.05  
2.06  
2.06  
2.07  
2.07  
2.42  
2.45  
3.74

4.69  
4.73

5.60

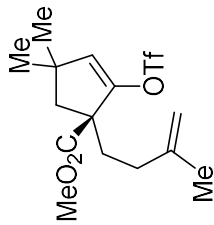

**S11**  
 (CDCl<sub>3</sub>, 500 MHz)

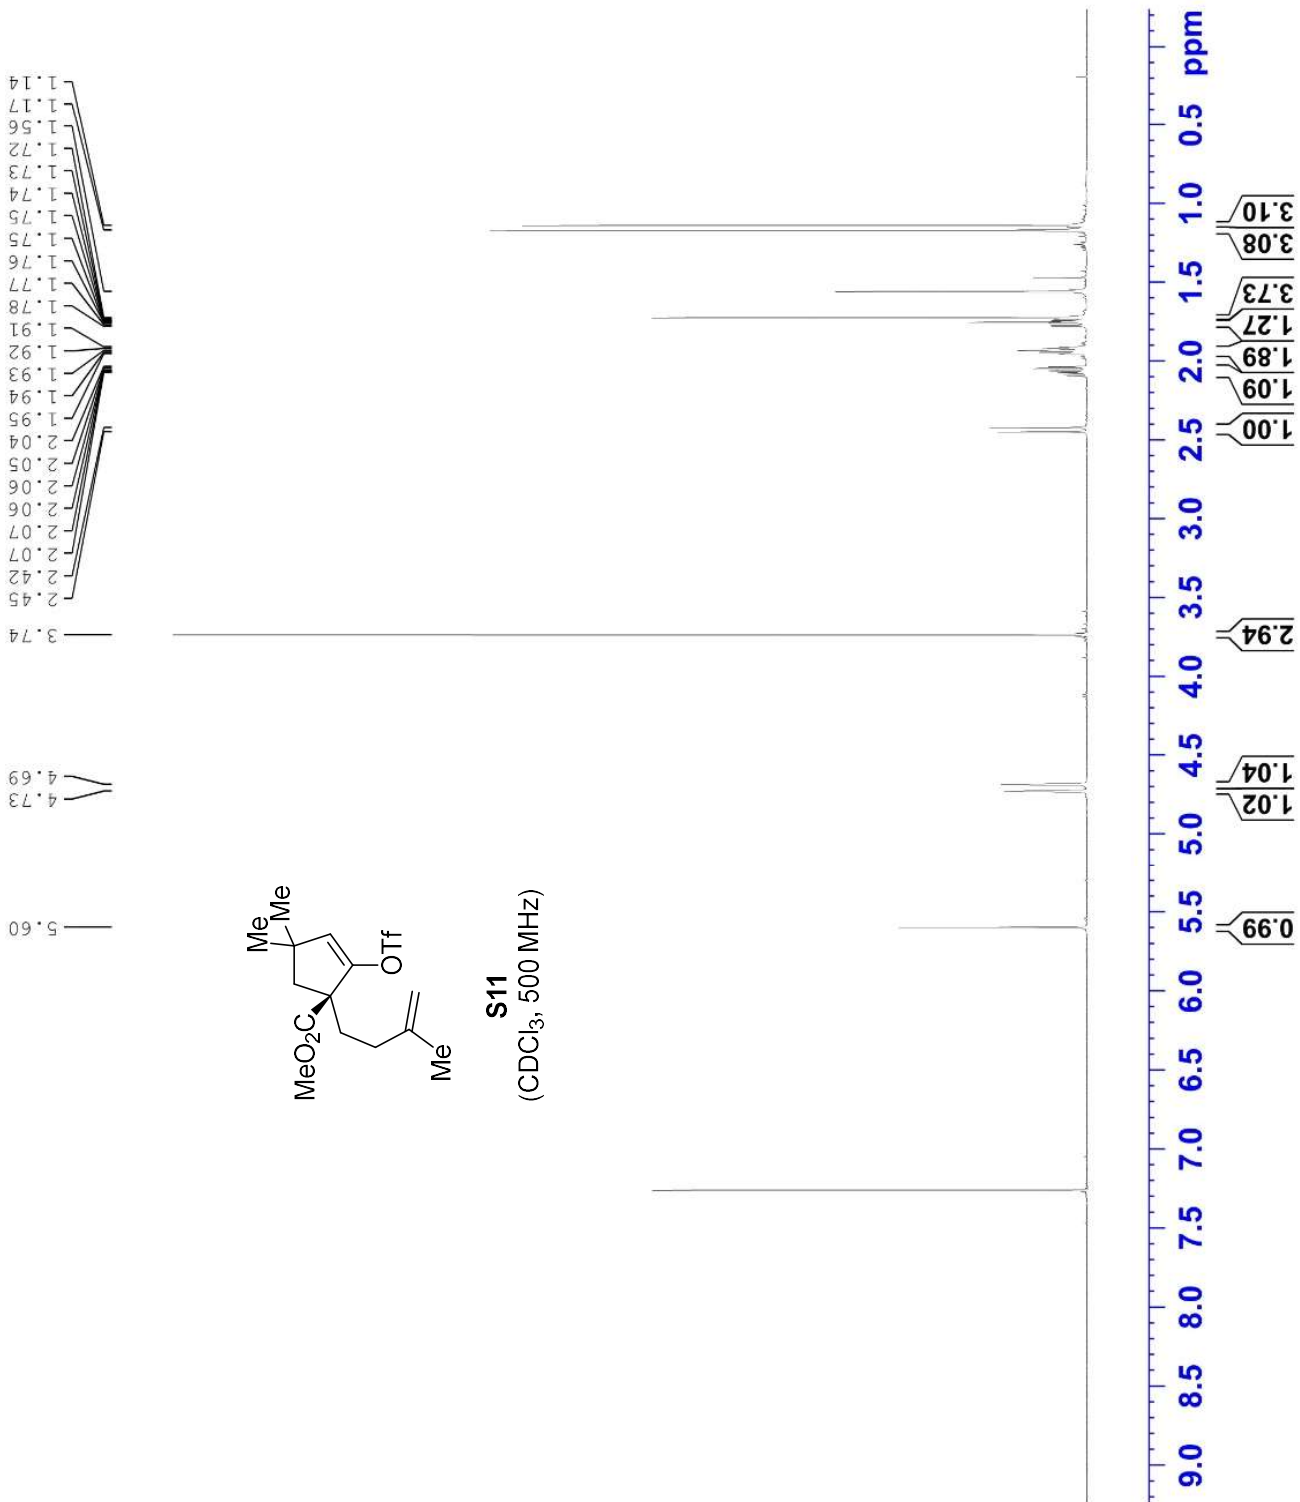

Current Data Parameters  
 NAME 5-member-ring-OTf  
 EXPNO 2  
 PROCNO 2

F2 - Acquisition Parameters  
 Date\_ 20190812  
 Time\_ 21.48  
 INSTRUM spect  
 PROBHD 5 mm PABBO BB/  
 PULPROG zgdc  
 TD 187496  
 SOLVENT CDC13  
 NS 329  
 DS 0  
 SWH 31250.000 Hz  
 FIDRES 0.166670 Hz  
 AQ 2.9999361 sec  
 RG 2050  
 DW 16.000 usec  
 DE 6.50 usec  
 TE 296.3 K  
 D1 3.00000000 sec  
 D11 0.03000000 sec  
 TD0 1

==== CHANNEL f1 =====  
 SFO1 125.7049802 MHz  
 NUC1 13C  
 P1 10.00 usec  
 PLW1 72.83999634 W

==== CHANNEL f2 =====  
 SFO2 499.8724993 MHz  
 NUC2 1H  
 CPDPRG|2 waltz16  
 PCPD2 80.00 usec  
 PLW2 19.00000000 W  
 PLW12 0.29688001 W

F2 - Processing parameters  
 SI 1048576  
 SF 125.6924115 MHz  
 WDW EM  
 SSB 0  
 LB 0.30 Hz  
 GB 0  
 PC 1.40

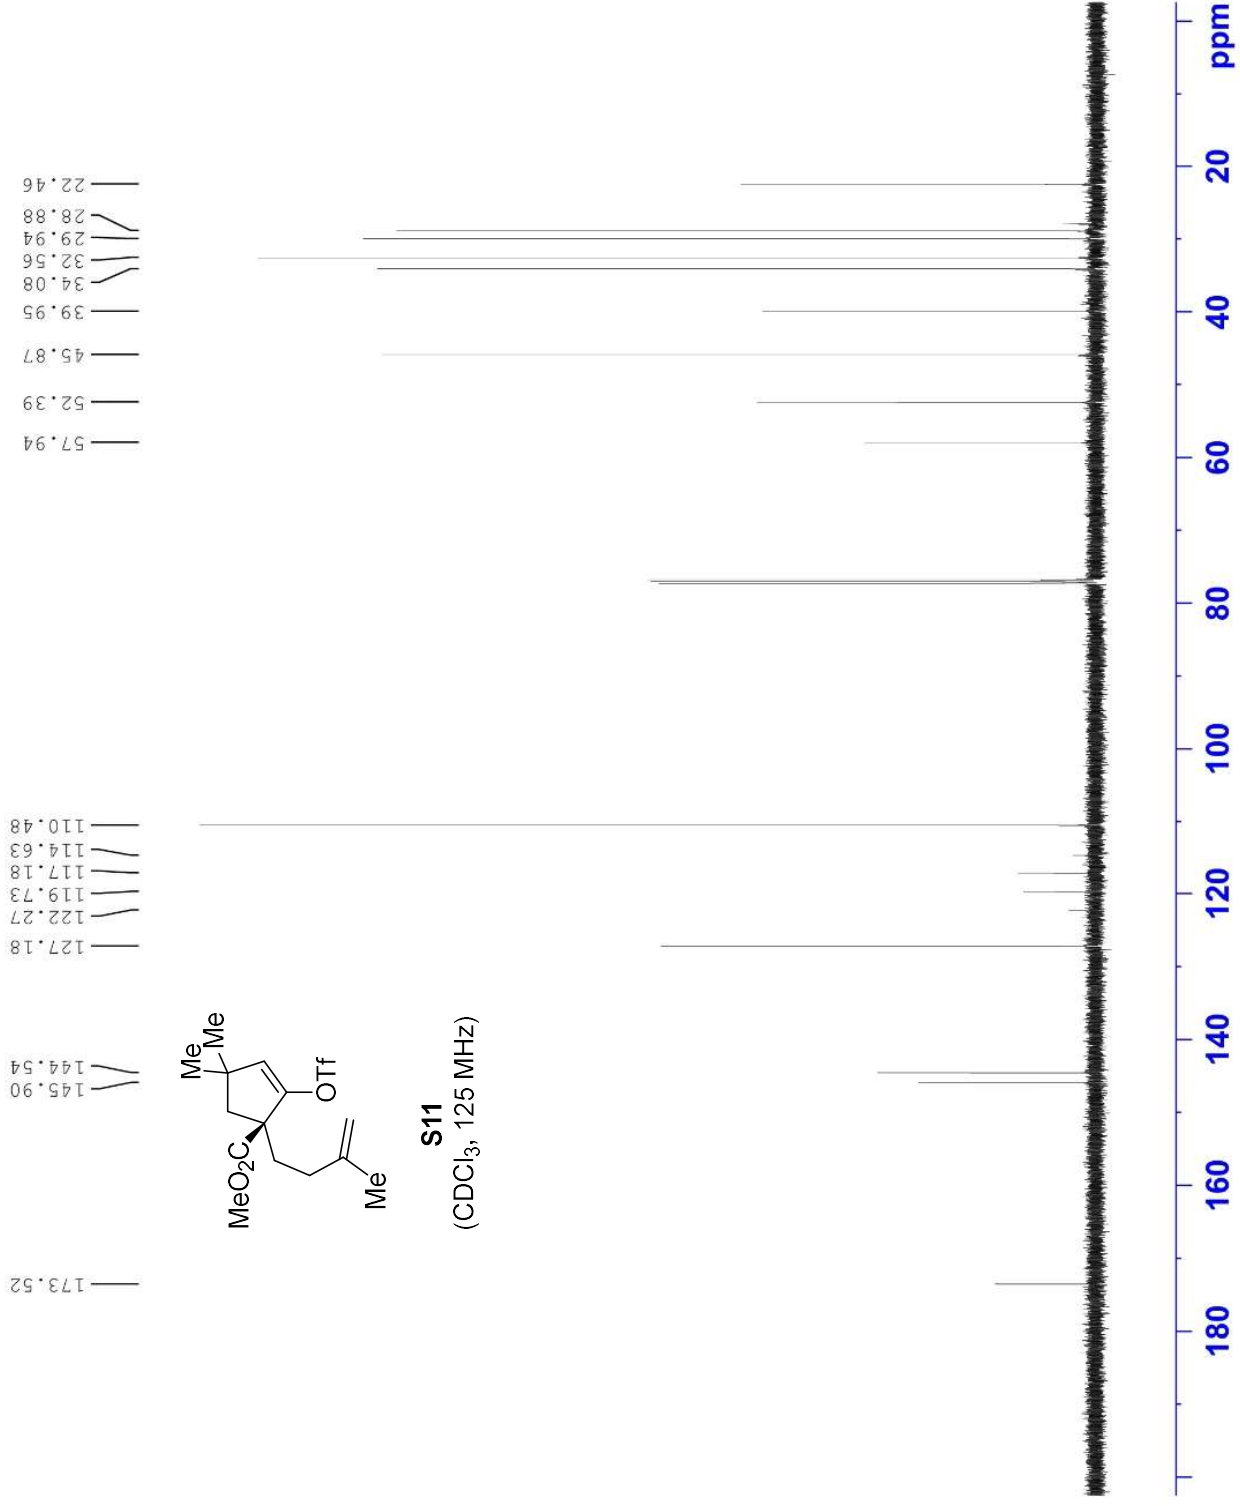

Current Data Parameters  
 NAME Yh-5-36-I  
 EXPNO 1  
 PROCNO 1

F2 - Acquisition Parameters

Date\_ 20180801  
 Time\_ 13.14  
 INSTRUM spect  
 PROBHD 5 mm PATXI 1H/  
 PULPROG zg  
 TD 59998  
 SOLVENT CDC13  
 NS 6  
 DS 0  
 SWH 10000.000 Hz  
 FIDRES 0.166672 Hz  
 AQ 2.9999001 sec  
 RG 30.11  
 DW 50.000 usec  
 DE 10.000 usec  
 TE 294.1 K  
 D1 3.00000000 sec  
 TD0 1

==== CHANNEL f1 =====  
 SFO1 500.1330885 MHz  
 NUC1 1H  
 P1 2.67 usec  
 PLW1 12.19999981 W

F2 - Processing parameters  
 SI 65536  
 SF 500.1300136 MHz  
 WDW EM  
 SSB 0  
 LB 0.30 Hz  
 GB 0  
 PC 1.00

2.71  
2.68  
2.48  
2.45  
1.87  
1.86  
1.85  
1.84  
1.83  
1.82  
1.80  
1.80  
1.67  
1.22  
1.06  
0.87

4.69  
4.63

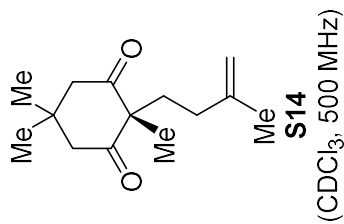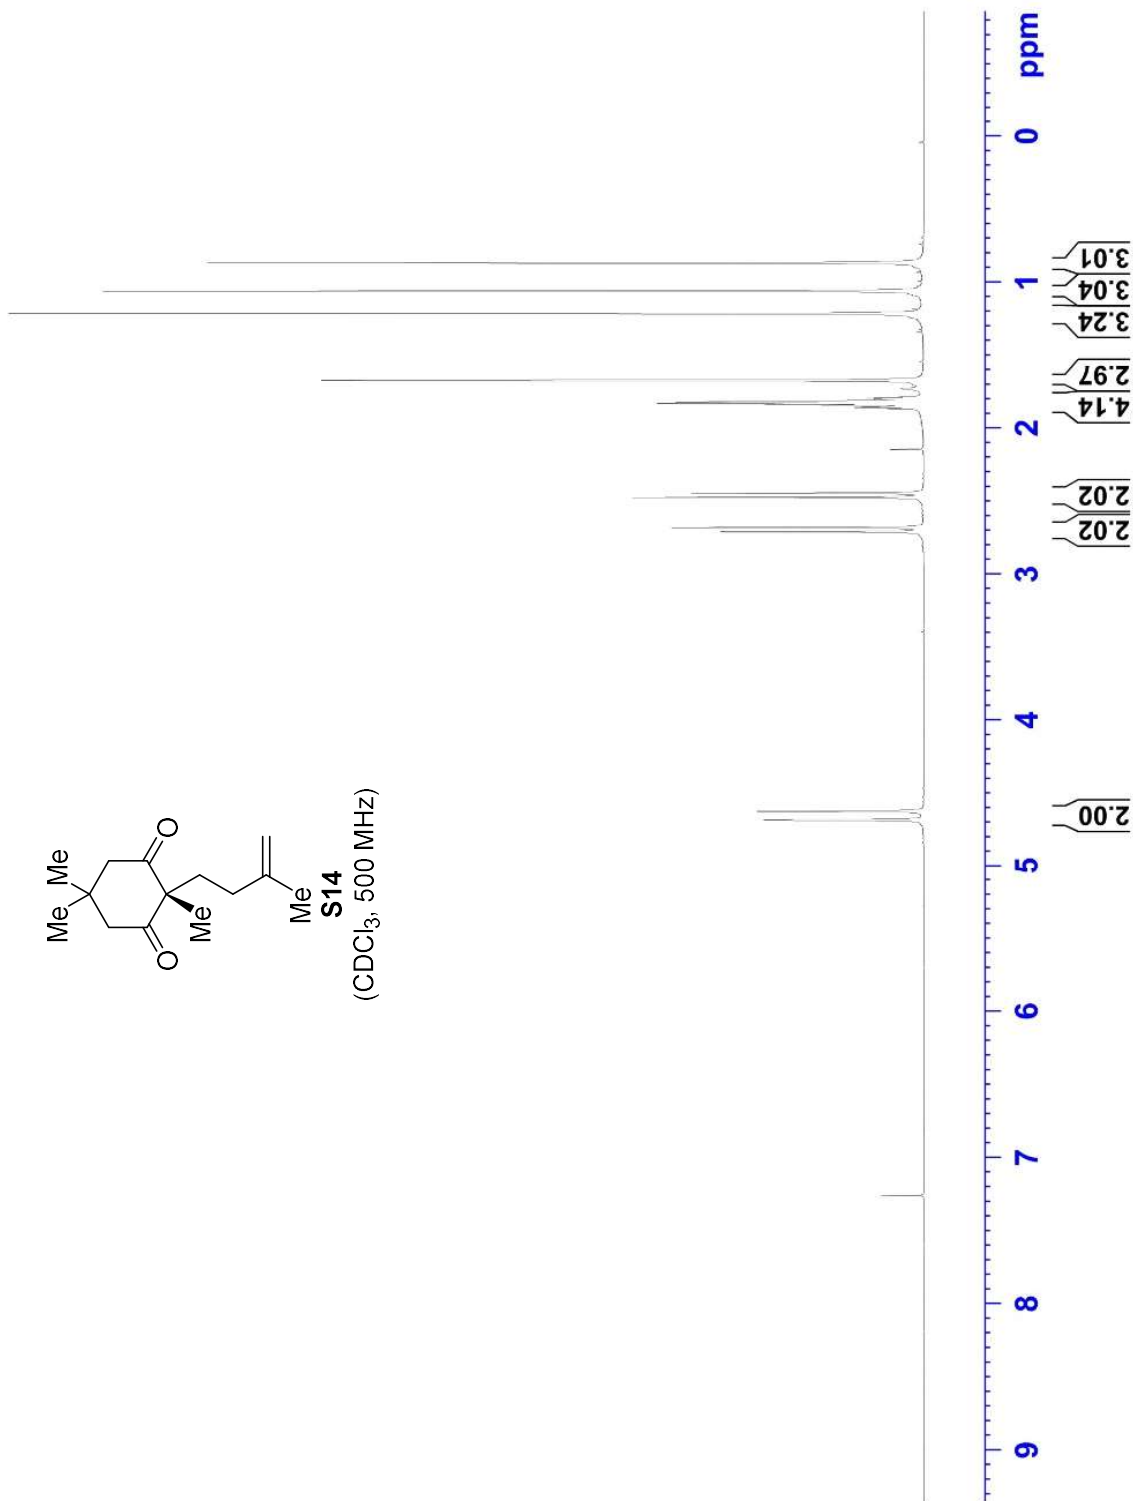

Current Data Parameters  
 NAME Yh-5-36-I  
 EXPNO 2  
 PROCNO 2

F2 - Acquisition Parameters  
 Date\_ 20180801  
 Time\_ 13.41  
 INSTRUM spect  
 PROBHD 5 mm PABBO BB/  
 PULPROG zgdc  
 TD 187496  
 SOLVENT CDC13  
 NS 97  
 DS 0  
 SWH 31250.000 Hz  
 FIDRES 0.166670 Hz  
 AQ 2.9999361 sec  
 RG 2050  
 DW 16.000 usec  
 DE 6.50 usec  
 TE 296.6 K  
 D1 4.00000000 sec  
 D11 0.03000000 sec  
 TD0 1

==== CHANNEL f1 =====  
 SFO1 125.7049802 MHz  
 NUC1 13C  
 P1 3.58 usec  
 PLW1 72.83999634 W

==== CHANNEL f2 =====  
 SFO2 499.8724993 MHz  
 NUC2 1H  
 CPDPRG|2 waltz16  
 PCPD2 80.00 usec  
 PLW2 19.00000000 W  
 PLW12 0.29688001 W

F2 - Processing parameters  
 SI 1048576  
 SF 125.6924115 MHz  
 WDW EM  
 SSB 0  
 LB 0.30 Hz  
 GB 0  
 PC 1.40

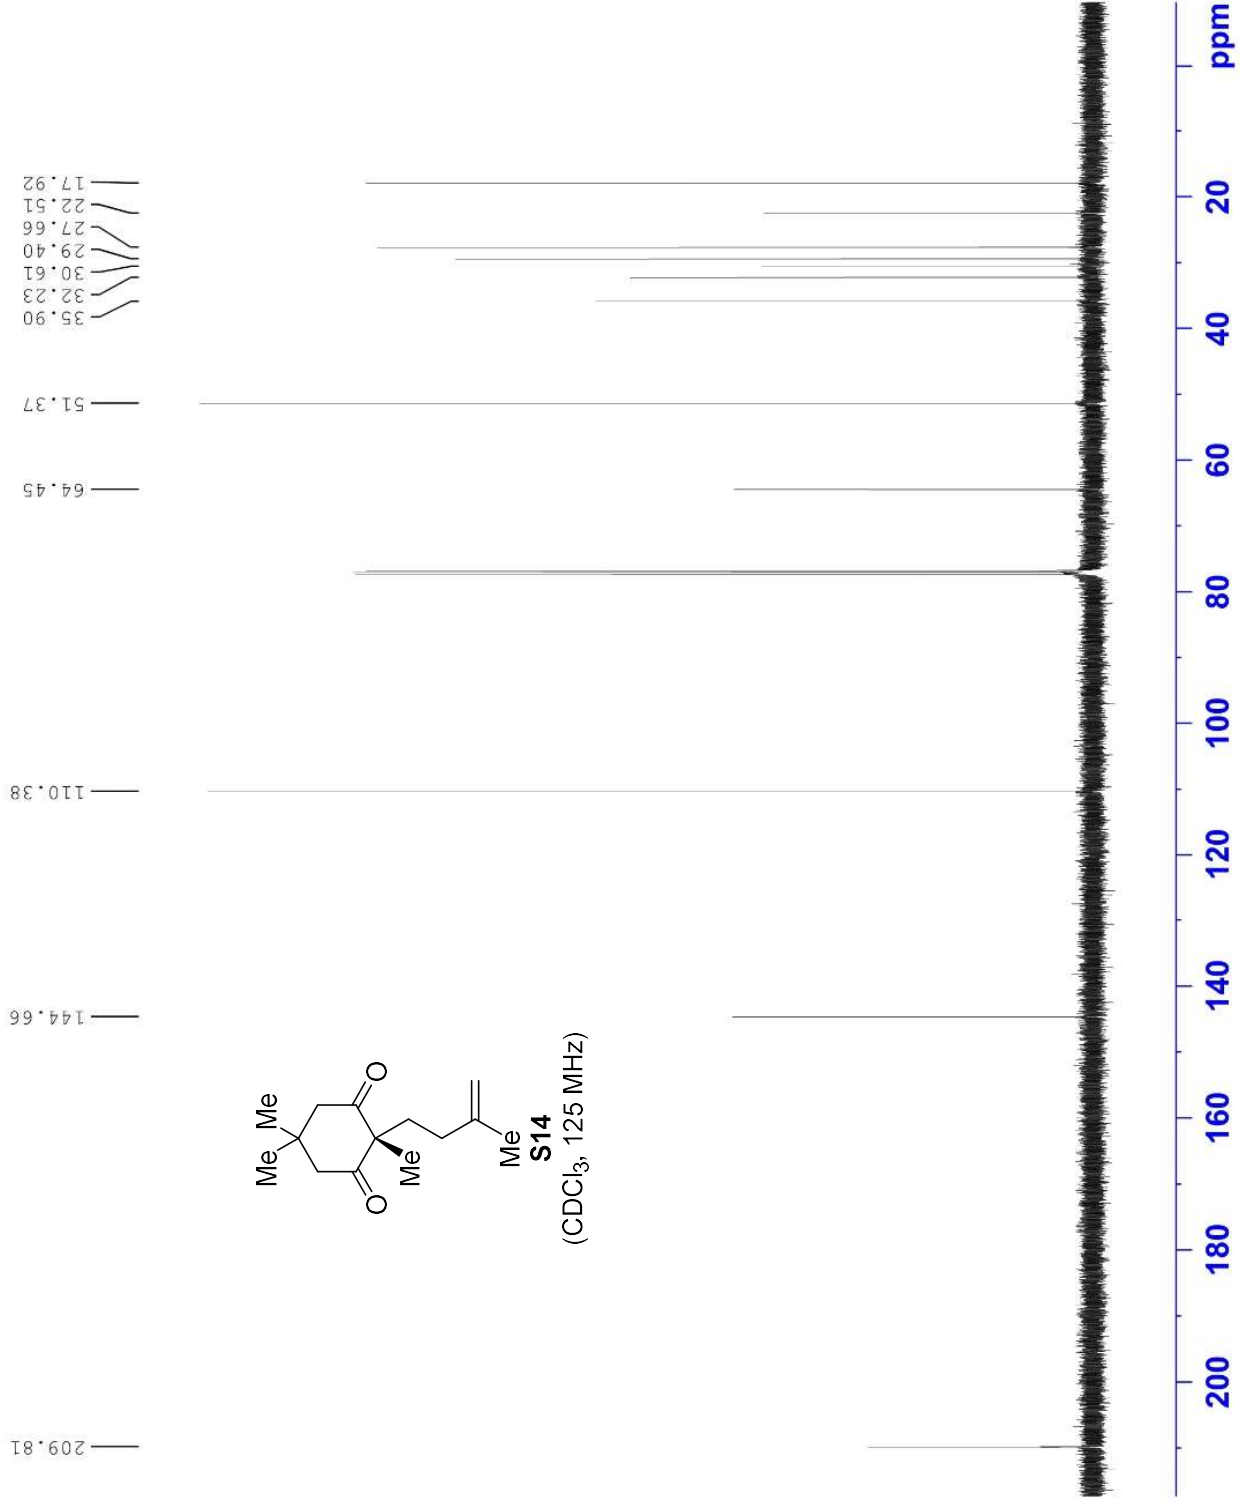

Current Data Parameters  
 NAME Yh-5-38-1  
 EXPNO 1  
 PROCNO 1

F2 - Acquisition Parameters

Date\_ 20180801  
 Time\_ 13.54  
 INSTRUM spect  
 PROBHD 5 mm PATXI 1H/  
 PULPROG zg  
 TD 59998  
 SOLVENT CDC13  
 NS 8  
 DS 0  
 SWH 10000.000 Hz  
 FIDRES 0.166672 Hz  
 AQ 2.9999001 sec  
 RG 97.37  
 DW 50.000 usec  
 DE 10.00 usec  
 TE 294.2 K  
 D1 3.00000000 sec  
 TD0 1

==== CHANNEL f1 =====  
 SFO1 500.1330885 MHz  
 NUC1 1H  
 P1 2.67 usec  
 PLW1 12.19999981 W

F2 - Processing parameters  
 SI 65536  
 SF 500.1300138 MHz  
 WDW EM  
 SSB 0  
 LB 0.30 Hz  
 GB 0  
 PC 1.00

2.54  
2.51  
2.39  
2.36  
2.04  
2.03  
2.02  
2.02  
2.01  
2.00  
1.98  
1.82  
1.80  
1.78  
1.69  
1.66  
1.64  
1.63  
1.62  
1.61  
1.60  
1.30  
1.16  
1.13

4.70  
4.66  
4.66

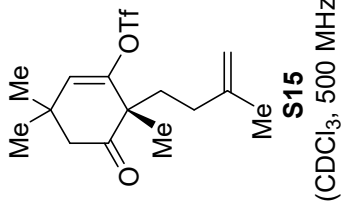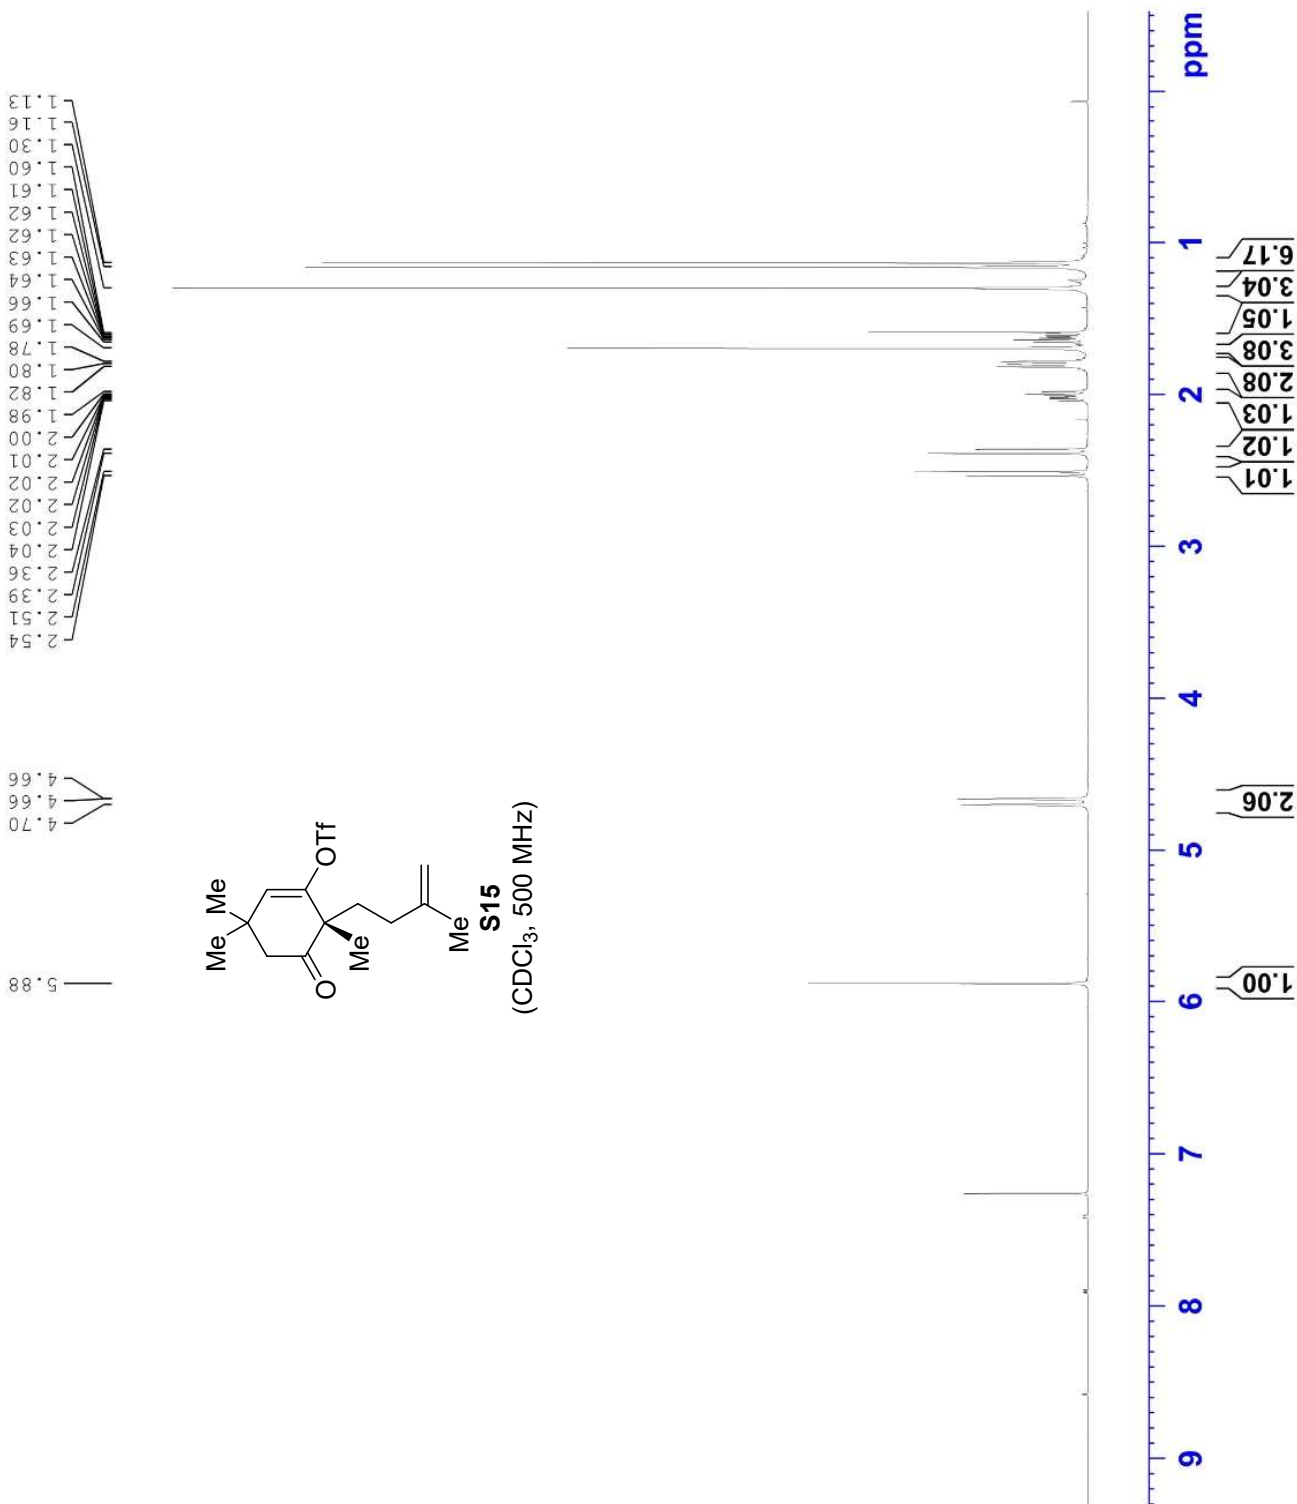

Current Data Parameters  
 NAME Yh-5-38-1  
 EXPNO 2  
 PROCNO 2

F2 - Acquisition Parameters  
 Date\_ 20180801  
 Time\_ 14.37  
 INSTRUM spect  
 PROBHD 5 mm PABBO BB/  
 PULPROG zgdc  
 TD 187496  
 SOLVENT CDC13  
 NS 158  
 DS 0  
 SWH 31250.000 Hz  
 FIDRES 0.166670 Hz  
 AQ 2.9999361 sec  
 RG 2050  
 DW 16.000 usec  
 DE 6.50 usec  
 TE 297.1 K  
 D1 3.00000000 sec  
 D11 0.03000000 sec  
 TD0 1

==== CHANNEL f1 =====  
 SFO1 125.7049802 MHz  
 NUC1 13C  
 P1 10.00 usec  
 PLW1 72.83999634 W

==== CHANNEL f2 =====  
 SFO2 499.8724993 MHz  
 NUC2 1H  
 CPDPRG|2 waltz16  
 PCPD2 80.00 usec  
 PLW2 19.00000000 W  
 PLW12 0.29688001 W

F2 - Processing parameters  
 SI 1048576  
 SF 125.6924115 MHz  
 WDW EM  
 SSB 0  
 LB 0.30 Hz  
 GB 0  
 PC 1.40

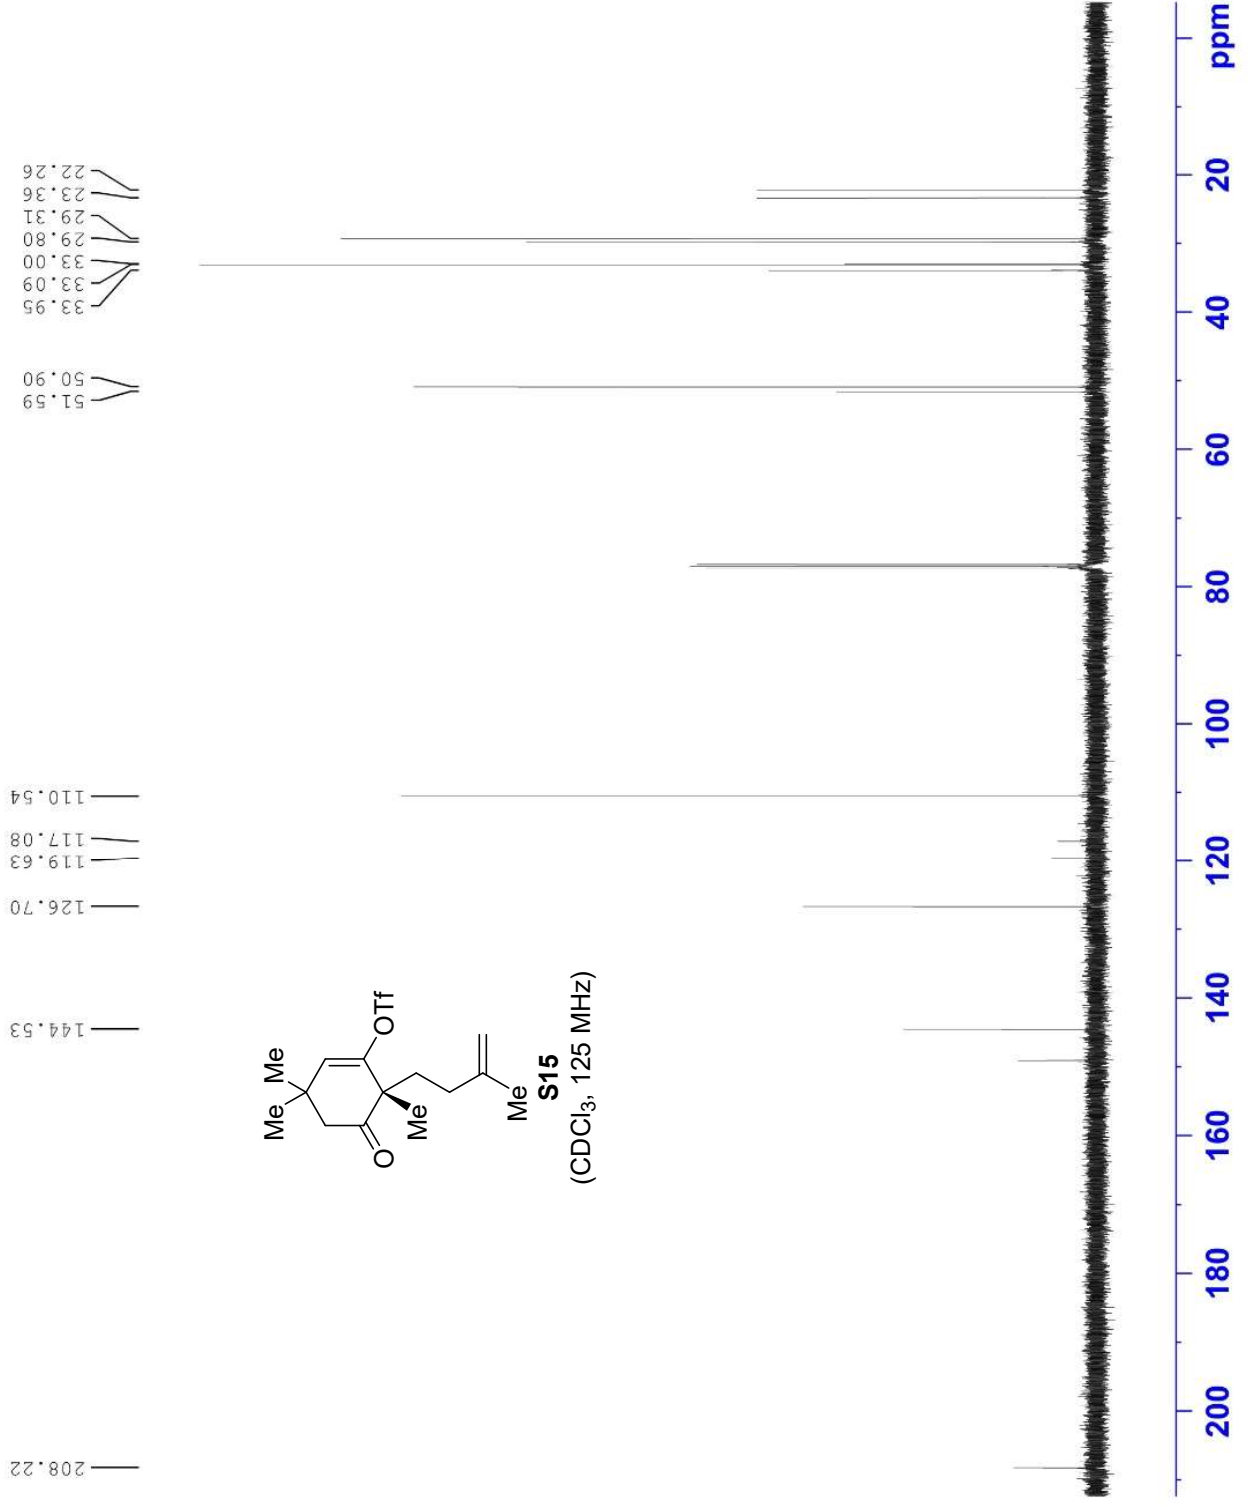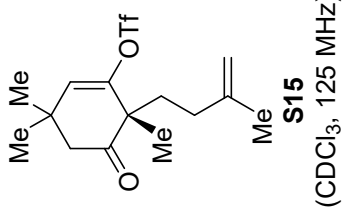

Current Data Parameters  
 NAME Yh-5-52-a  
 EXPNO 1  
 PROCNO 1

F2 - Acquisition Parameters

Date\_ 20190711  
 Time\_ 23.52  
 INSTRUM spect  
 PROBHD 5 mm PABBO BB/  
 PULPROG zg  
 TD 59998  
 SOLVENT CDC13  
 NS 1  
 DS 0  
 SWH 10000.000 Hz  
 FIDRES 0.166672 Hz  
 AQ 2.9999001 sec  
 RG 56.75  
 DW 50.000 usec  
 DE 6.50 usec  
 TE 296.1 K  
 D1 4.0000000 sec  
 TD0 1

==== CHANNEL f1 =====  
 SFO1 499.8730869 MHz  
 NUC1 1H  
 P1 3.58 usec  
 PLW1 18.25000000 W

F2 - Processing parameters  
 SI 65536  
 SF 499.8700118 MHz  
 WDW EM  
 SSB 0  
 LB 0.30 Hz  
 GB 0  
 PC 1.00

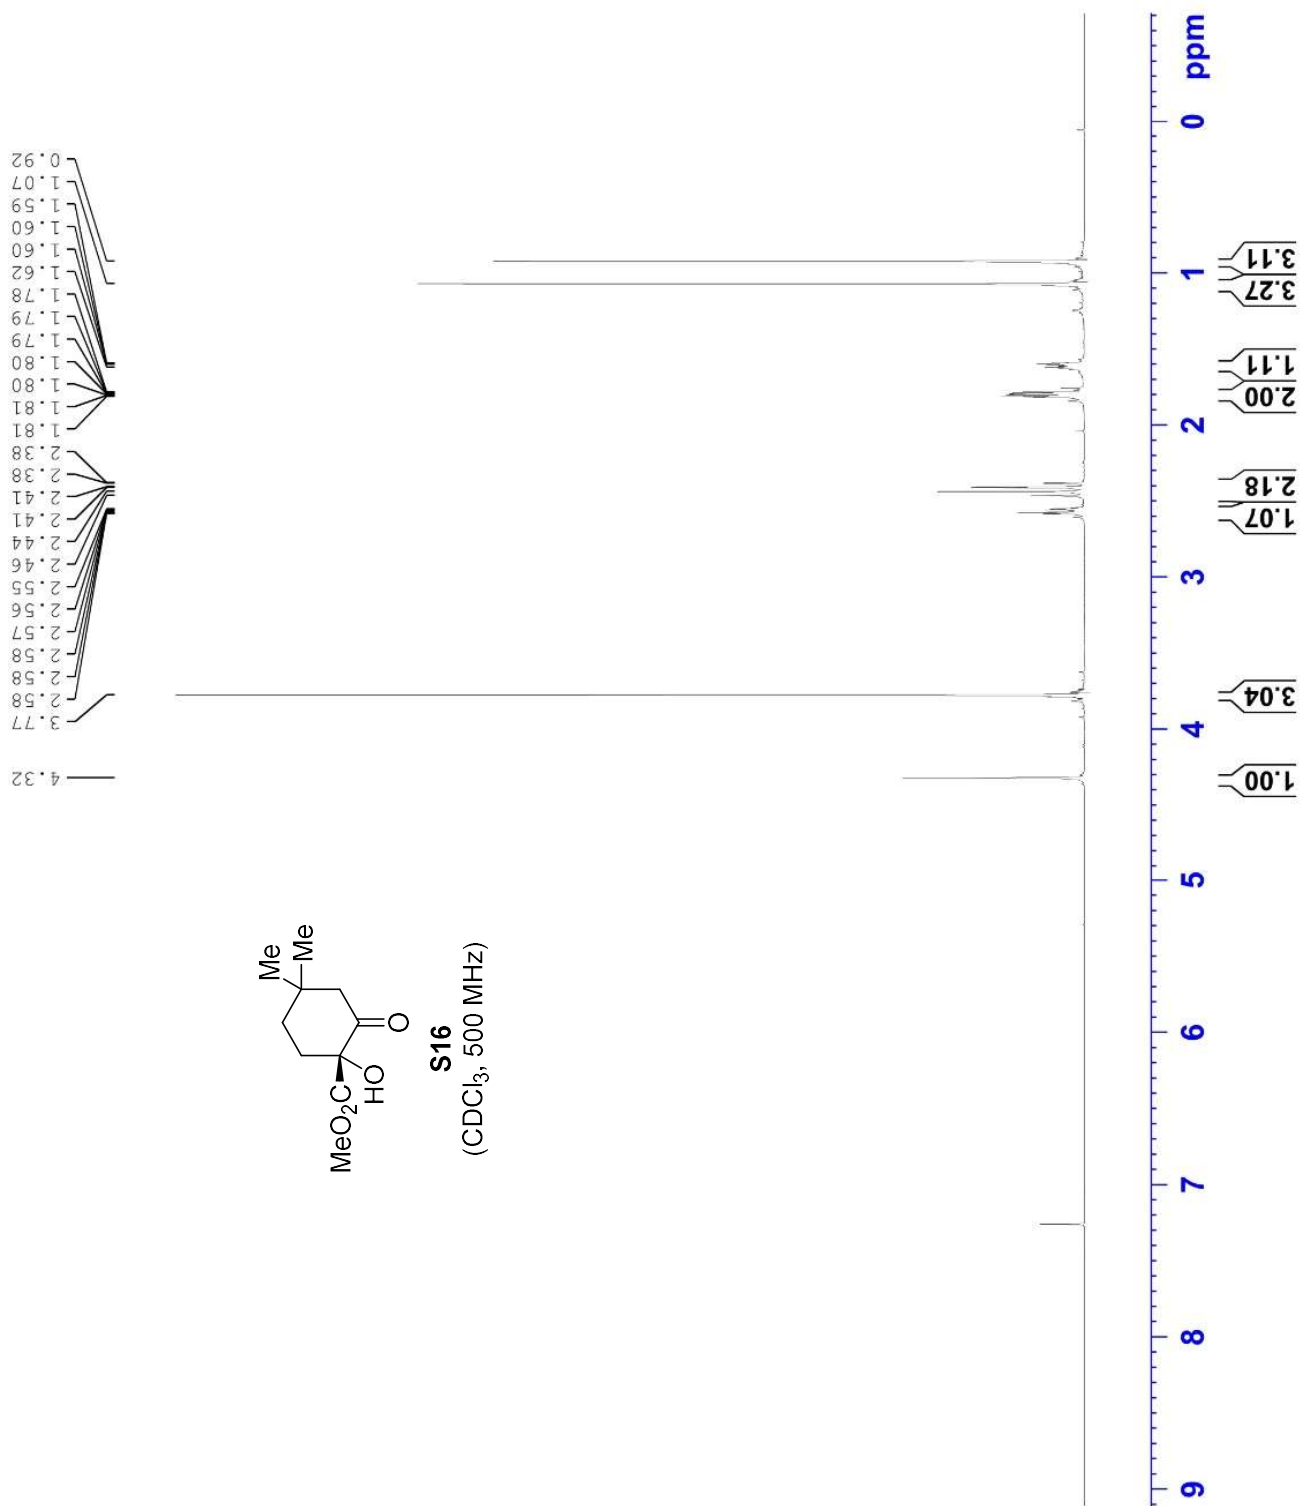

Current Data Parameters  
 NAME Yh-5-52-a  
 EXPNO 2  
 PROCNO 2

F2 - Acquisition Parameters

Date\_ 20190711  
 Time\_ 23.58  
 INSTRUM spect  
 PROBHD 5 mm PABBO BB/  
 PULPROG zgdc  
 TD 187496  
 SOLVENT CDC13  
 NS 7  
 DS 0  
 SWH 31250.000 Hz  
 FIDRES 0.166670 Hz  
 AQ 2.9999361 sec  
 RG 2050  
 DW 16.000 usec  
 DE 6.50 usec  
 TE 296.3 K  
 D1 3.00000000 sec  
 D11 0.03000000 sec  
 TD0 1

==== CHANNEL f1 =====  
 SFO1 125.7049802 MHz  
 NUC1 13C  
 P1 10.00 usec  
 PLW1 72.83999634 W

==== CHANNEL f2 =====  
 SFO2 499.8724993 MHz  
 NUC2 1H  
 CPDPRG|2 waltz16  
 PCPD2 80.00 usec  
 PLW2 19.00000000 W  
 PLW12 0.29688001 W

F2 - Processing parameters  
 SI 1048576  
 SF 125.6924115 MHz  
 WDW EM  
 SSB 0  
 LB 0.30 Hz  
 GB 0  
 PC 1.40

206.95  
 170.51  
 79.93  
 53.01  
 51.44  
 36.94  
 35.08  
 33.36  
 30.65  
 26.10

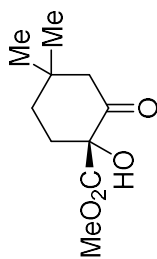

**S16**  
 (CDCl<sub>3</sub>, 125 MHz)

ppm

20

40

60

80

100

120

140

160

180

200





Current Data Parameters  
 NAME Yh-5-77-a  
 EXPNO 2  
 PROCNO 2

F2 - Acquisition Parameters  
 Date\_ 20190711  
 Time\_ 15.02  
 INSTRUM spect  
 PROBHD 5 mm PABBO BB/  
 PULPROG zgdc  
 TD 187496  
 SOLVENT CDC13  
 NS 21  
 DS 0  
 SWH 31250.000 Hz  
 FIDRES 0.166670 Hz  
 AQ 2.9999361 sec  
 RG 2050  
 DW 16.000 usec  
 DE 6.50 usec  
 TE 295.8 K  
 D1 3.00000000 sec  
 D11 0.03000000 sec  
 TD0 1

==== CHANNEL f1 =====  
 SFO1 125.7049802 MHz  
 NUC1 13C  
 P1 10.00 usec  
 PLW1 72.83999634 W

==== CHANNEL f2 =====  
 SFO2 499.8724993 MHz  
 NUC2 1H  
 CPDPRG|2 waltz16  
 PCPD2 80.00 usec  
 PLW2 19.00000000 W  
 PLW12 0.29688001 W

F2 - Processing parameters  
 SI 1048576  
 SF 125.6924115 MHz  
 WDW EM  
 SSB 0  
 LB 0.30 Hz  
 GB 0  
 PC 1.40

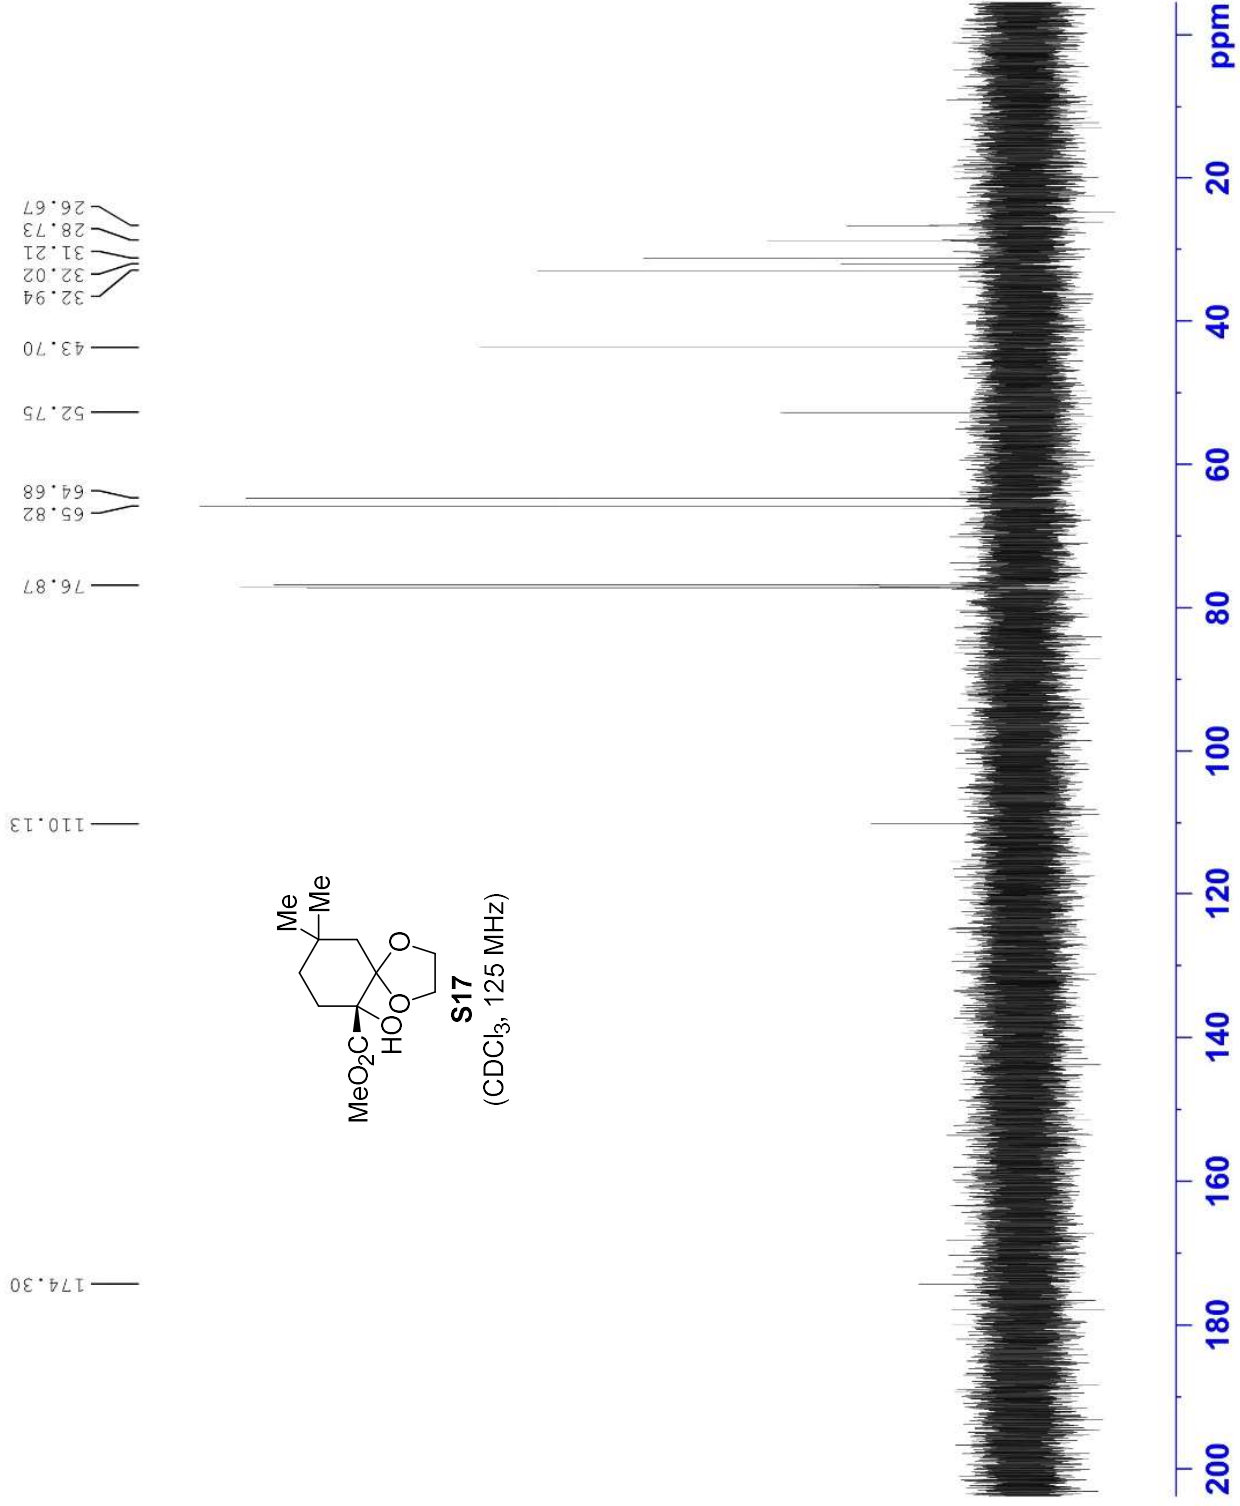

Current Data Parameters  
 NAME Yh-5-78-C  
 EXPNO 1  
 PROCNO 1

F2 - Acquisition Parameters

Date 20190712  
 Time 17.20  
 INSTRUM spect  
 PROBHD 5 mm PABBO BB/  
 PULPROG zg  
 TD 59998  
 SOLVENT CDC13  
 NS 1  
 DS 0  
 SWH 10000.000 Hz  
 FIDRES 0.166672 Hz  
 AQ 2.9999001 sec  
 RG 44.57  
 DW 50.000 usec  
 DE 6.50 usec  
 TE 297.0 K  
 D1 4.00000000 sec  
 TD0 1

==== CHANNEL f1 =====  
 SFO1 499.8730869 MHz  
 NUC1 1H  
 P1 3.58 usec  
 PLW1 18.25000000 W

F2 - Processing parameters  
 SI 65536  
 SF 499.8700120 MHz  
 WDW EM  
 SSB 0  
 LB 0.30 Hz  
 GB 0  
 PC 1.00

5.02  
4.84  
3.95  
3.94  
3.93  
3.92  
3.87  
3.86  
3.86  
3.85  
3.81  
3.80  
3.79  
3.79  
3.78  
3.77  
2.03  
2.02  
2.01  
2.00  
1.99  
1.98  
1.86  
1.83  
1.74  
1.41  
1.41  
1.39  
1.38  
1.38  
1.38  
1.37  
1.36  
1.34  
1.33  
1.32  
1.26  
1.25  
1.22

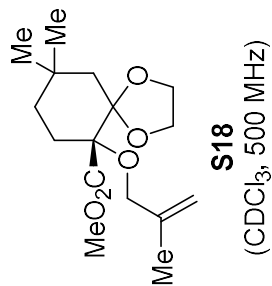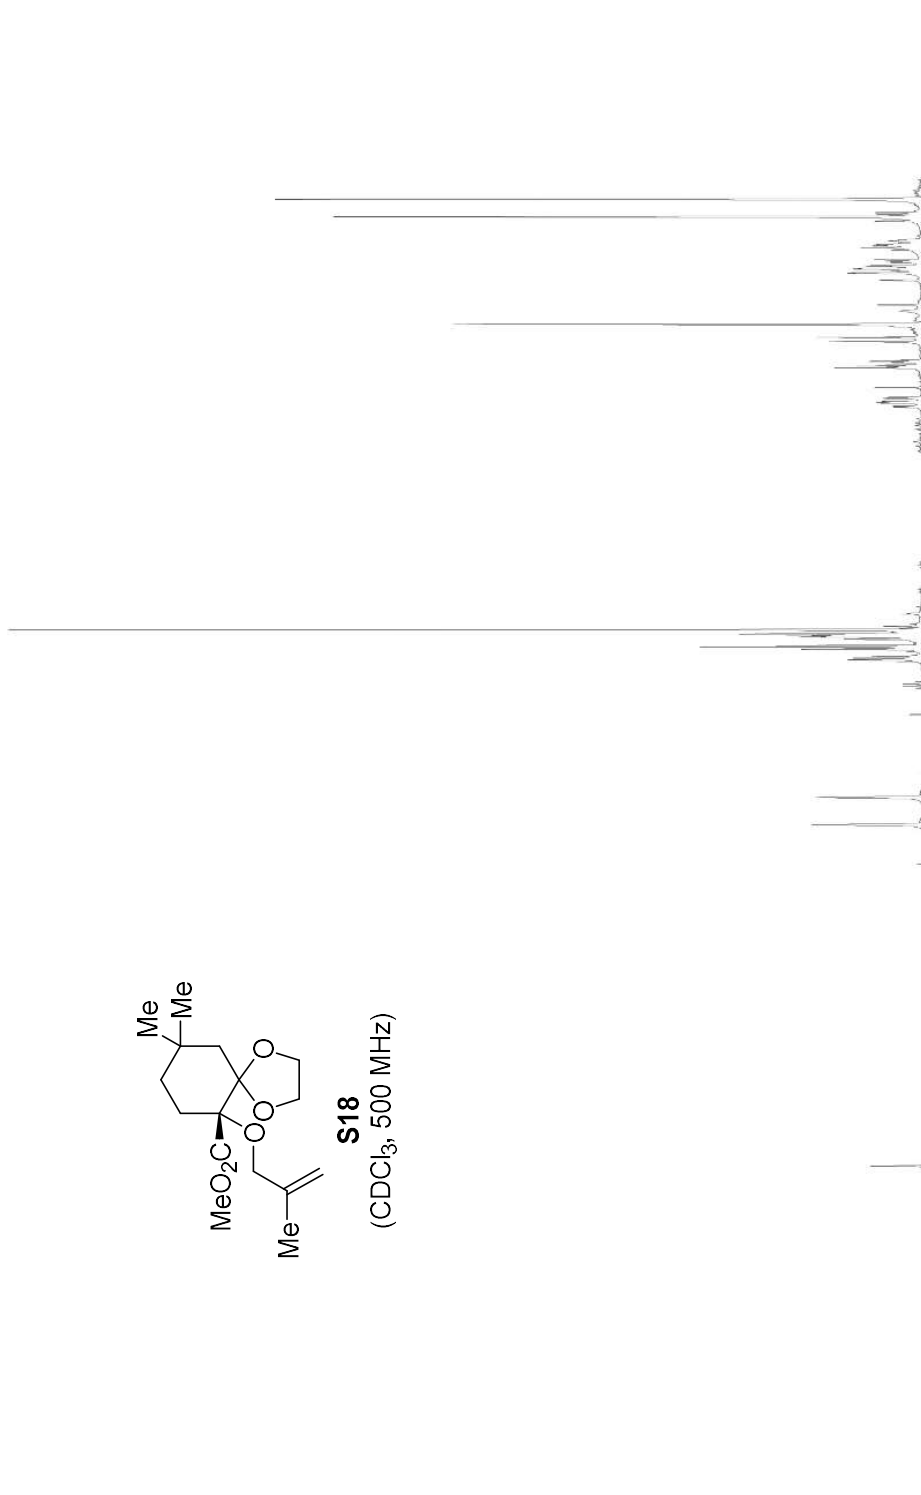

9.0 8.5 8.0 7.5 7.0 6.5 6.0 5.5 5.0 4.5 4.0 3.5 3.0 2.5 2.0 1.5 1.0 0.5 ppm

1.01  
1.02  
1.08  
1.11  
1.16  
1.27  
1.27  
1.30  
1.31  
1.39  
2.45  
2.17  
2.17  
3.17  
3.30  
3.79  
3.79  
3.80  
3.81  
3.85  
3.86  
3.86  
3.87  
3.92  
3.93  
3.94  
3.95  
4.84  
5.02

Current Data Parameters  
 NAME Yh-5-78-C  
 EXPNO 2  
 PROCNO 2

F2 - Acquisition Parameters  
 Date\_ 20190712  
 Time\_ 17.23  
 INSTRUM spect  
 PROBHD 5 mm PABBO BB/  
 PULPROG zgdc  
 TD 187496  
 SOLVENT CDC13  
 NS 3  
 DS 0  
 SWH 31250.000 Hz  
 FIDRES 0.166670 Hz  
 AQ 2.9999361 sec  
 RG 2050  
 DW 16.000 usec  
 DE 6.50 usec  
 TE 297.1 K  
 D1 3.00000000 sec  
 D11 0.03000000 sec  
 TD0 1

==== CHANNEL f1 =====  
 SFO1 125.7049802 MHz  
 NUC1 13C  
 P1 10.00 usec  
 PLW1 72.83999634 W

==== CHANNEL f2 =====  
 SFO2 499.8724993 MHz  
 NUC2 1H  
 CPDPRG|2 waltz16  
 PCPD2 80.00 usec  
 PLW2 19.00000000 W  
 PLW12 0.29688001 W

F2 - Processing parameters  
 SI 1048576  
 SF 125.6924115 MHz  
 WDW EM  
 SSB 0  
 LB 0.30 Hz  
 GB 0  
 PC 1.40

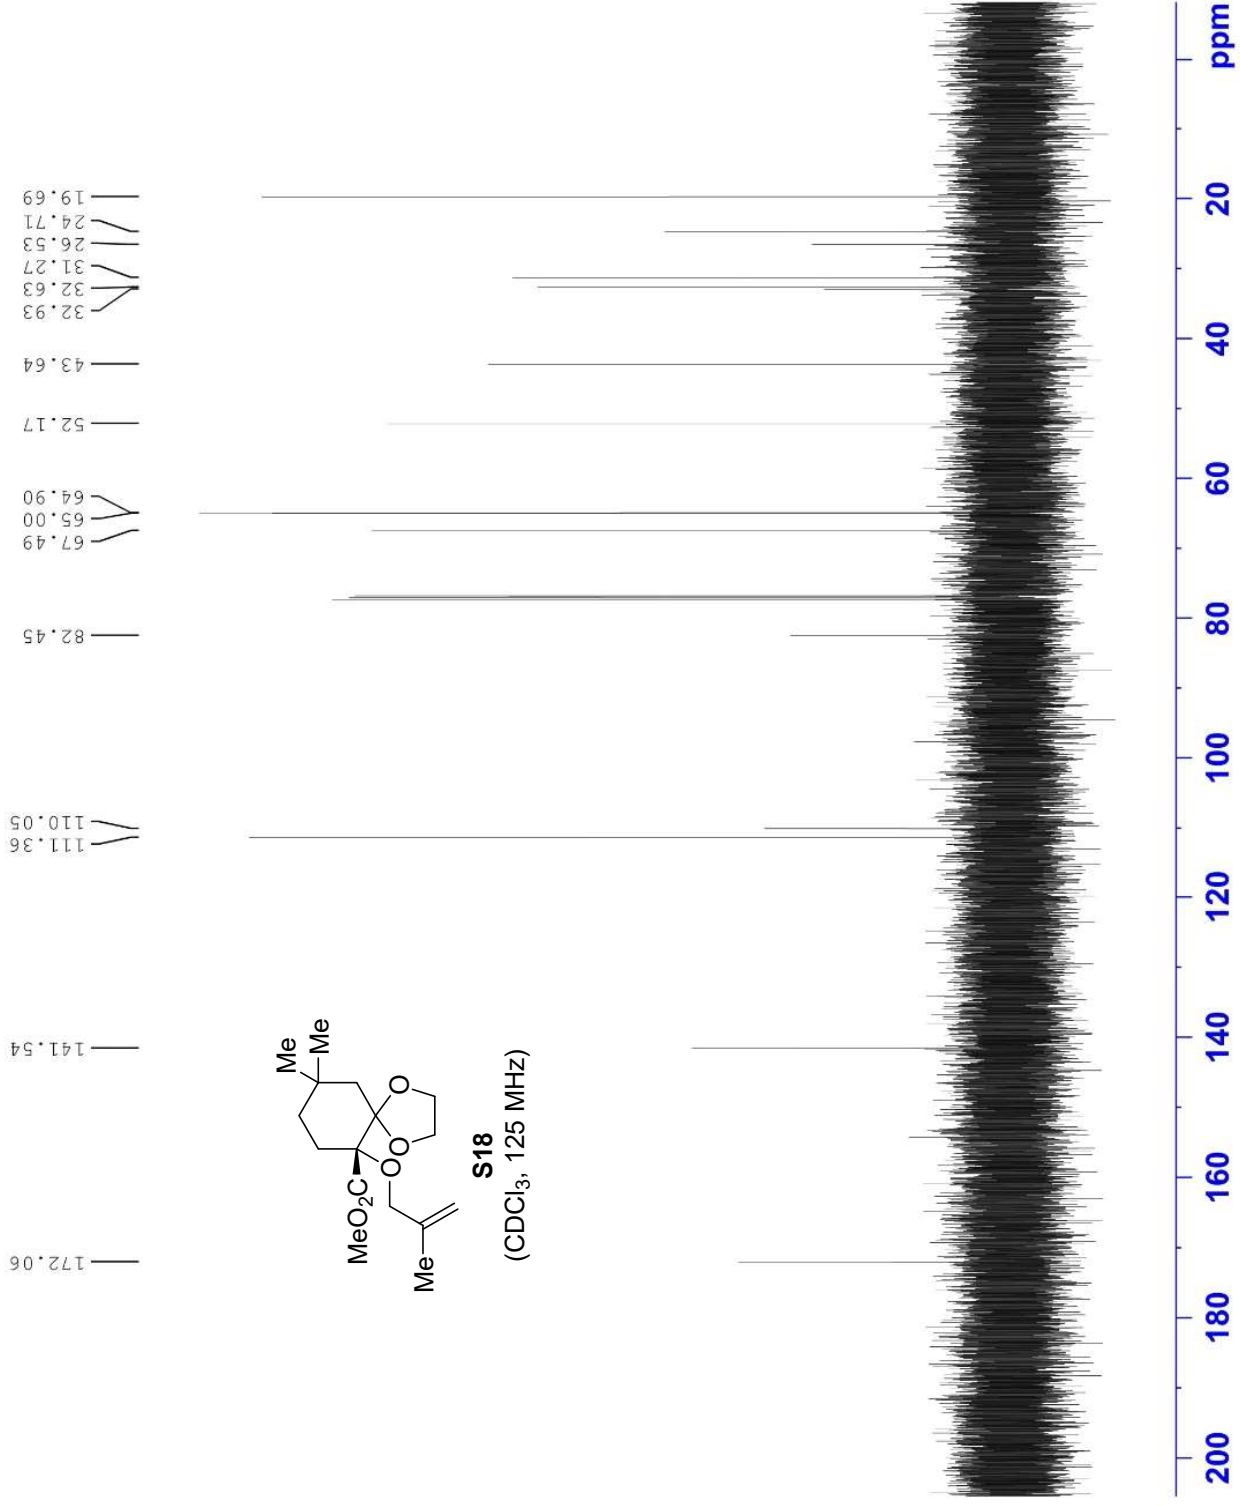

Current Data Parameters  
 NAME Yh-5-86-b  
 EXPNO 1  
 PROCNO 1

F2 - Acquisition Parameters  
 Date\_ 20190712  
 Time\_ 17.30  
 INSTRUM spect  
 PROBHD 5 mm PABBO BB/  
 PULPROG zg  
 TD 59998  
 SOLVENT CDC13  
 NS 2  
 DS 0  
 SWH 10000.000 Hz  
 FIDRES 0.166672 Hz  
 AQ 2.9999001 sec  
 RG 0.98  
 DW 50.000 usec  
 DE 6.50 usec  
 TE 297.1 K  
 D1 4.00000000 sec  
 TD0 1

==== CHANNEL f1 =====  
 SFO1 499.8730869 MHz  
 NUC1 1H  
 P1 3.58 usec  
 PLW1 18.25000000 W

F2 - Processing parameters  
 SI 65536  
 SF 499.8700121 MHz  
 WDW EM  
 SSB 0  
 LB 0.30 Hz  
 GB 0  
 PC 1.00

5.03  
4.89  
4.16  
4.13  
3.79  
3.77  
2.55  
2.53  
2.42  
2.42  
2.40  
2.39  
2.39  
2.37  
2.36  
2.18  
2.18  
2.15  
2.15  
2.14  
2.13  
2.13  
2.12  
2.11  
2.10  
2.10  
2.09  
1.86  
1.85  
1.84  
1.83  
1.82  
1.81  
1.62  
1.59  
1.47  
1.44  
1.04  
0.98

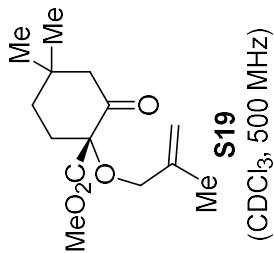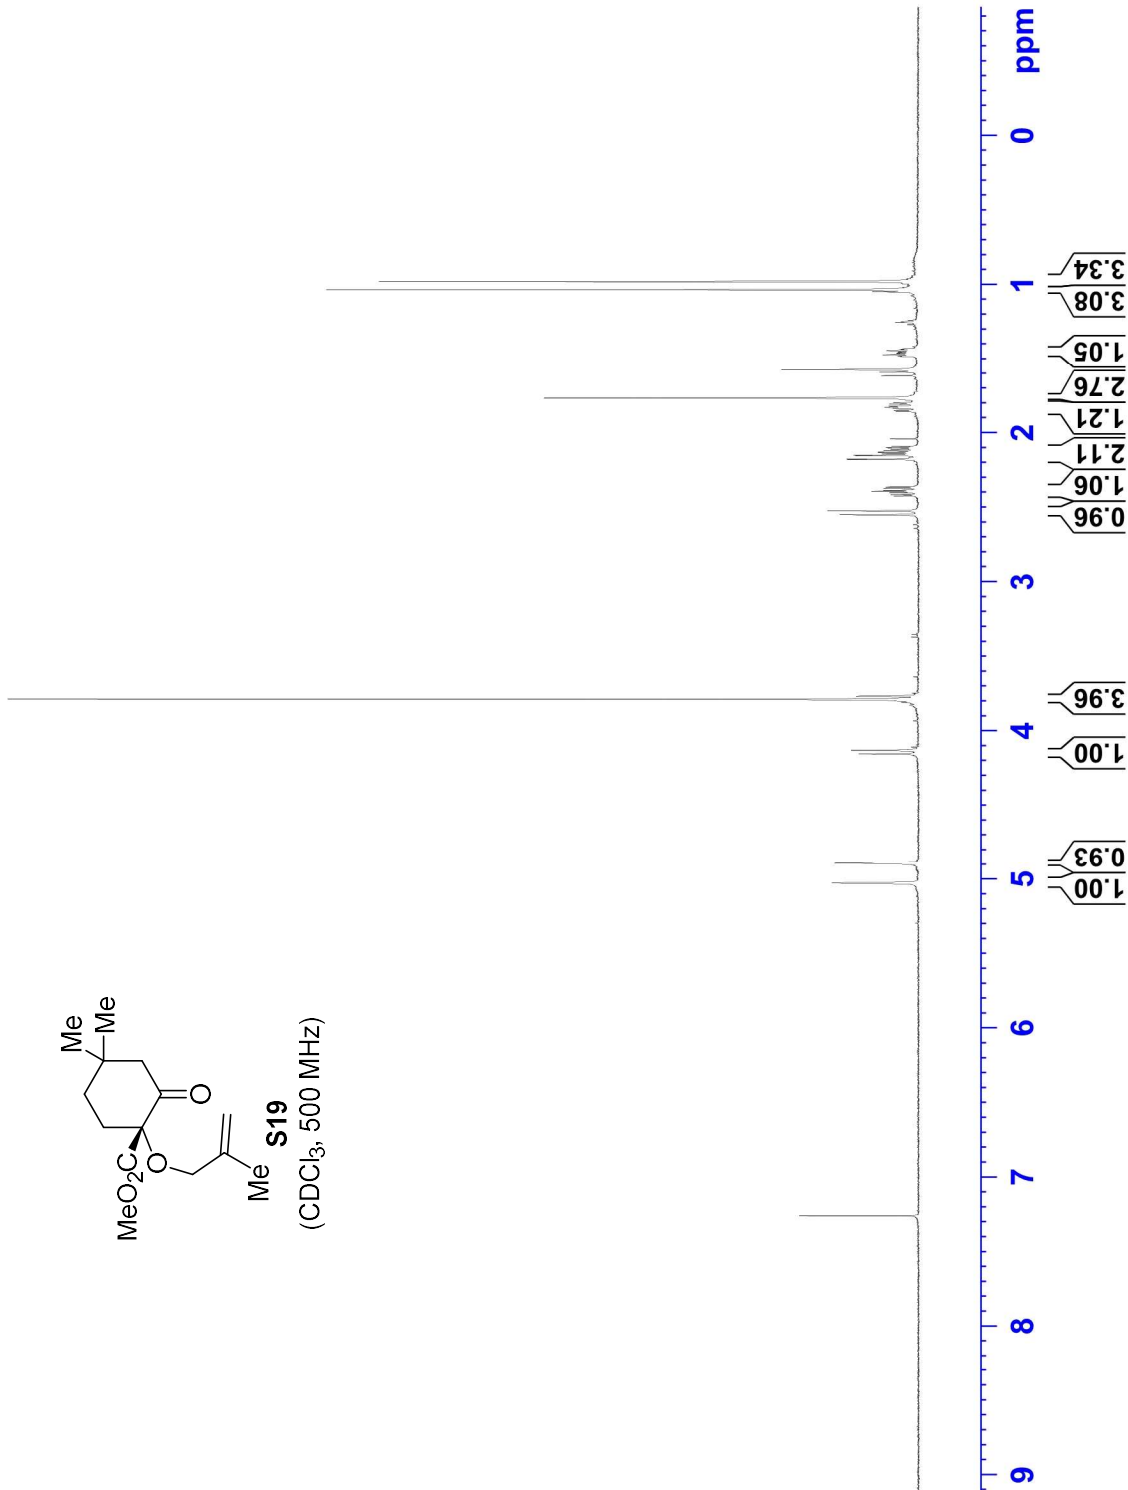

Current Data Parameters  
 NAME Yh-5-86-b  
 EXPNO 2  
 PROCNO 2

F2 - Acquisition Parameters  
 Date\_ 20190712  
 Time\_ 22.36  
 INSTRUM spect  
 PROBHD 5 mm PABBO BB/  
 PULPROG zgdc  
 TD 187496  
 SOLVENT CDC13  
 NS 387  
 DS 0  
 SWH 31250.000 Hz  
 FIDRES 0.166670 Hz  
 AQ 2.9999361 sec  
 RG 2050  
 DW 16.000 usec  
 DE 6.50 usec  
 TE 299.3 K  
 D1 3.0000000 sec  
 D11 0.0300000 sec  
 TD0 1

==== CHANNEL f1 =====  
 SFO1 125.7049802 MHz  
 NUC1 13C  
 P1 10.00 usec  
 PLW1 72.83999634 W

==== CHANNEL f2 =====  
 SFO2 499.8724993 MHz  
 NUC2 1H  
 CPDPRG[2] waltz16  
 PCPD2 80.00 usec  
 PLW2 19.00000000 W  
 PLW12 0.29688001 W

F2 - Processing parameters  
 SI 1048576  
 SF 125.6924115 MHz  
 EM  
 WDW 0  
 SSB 0  
 LB 0.30 Hz  
 GB 0  
 PC 1.40

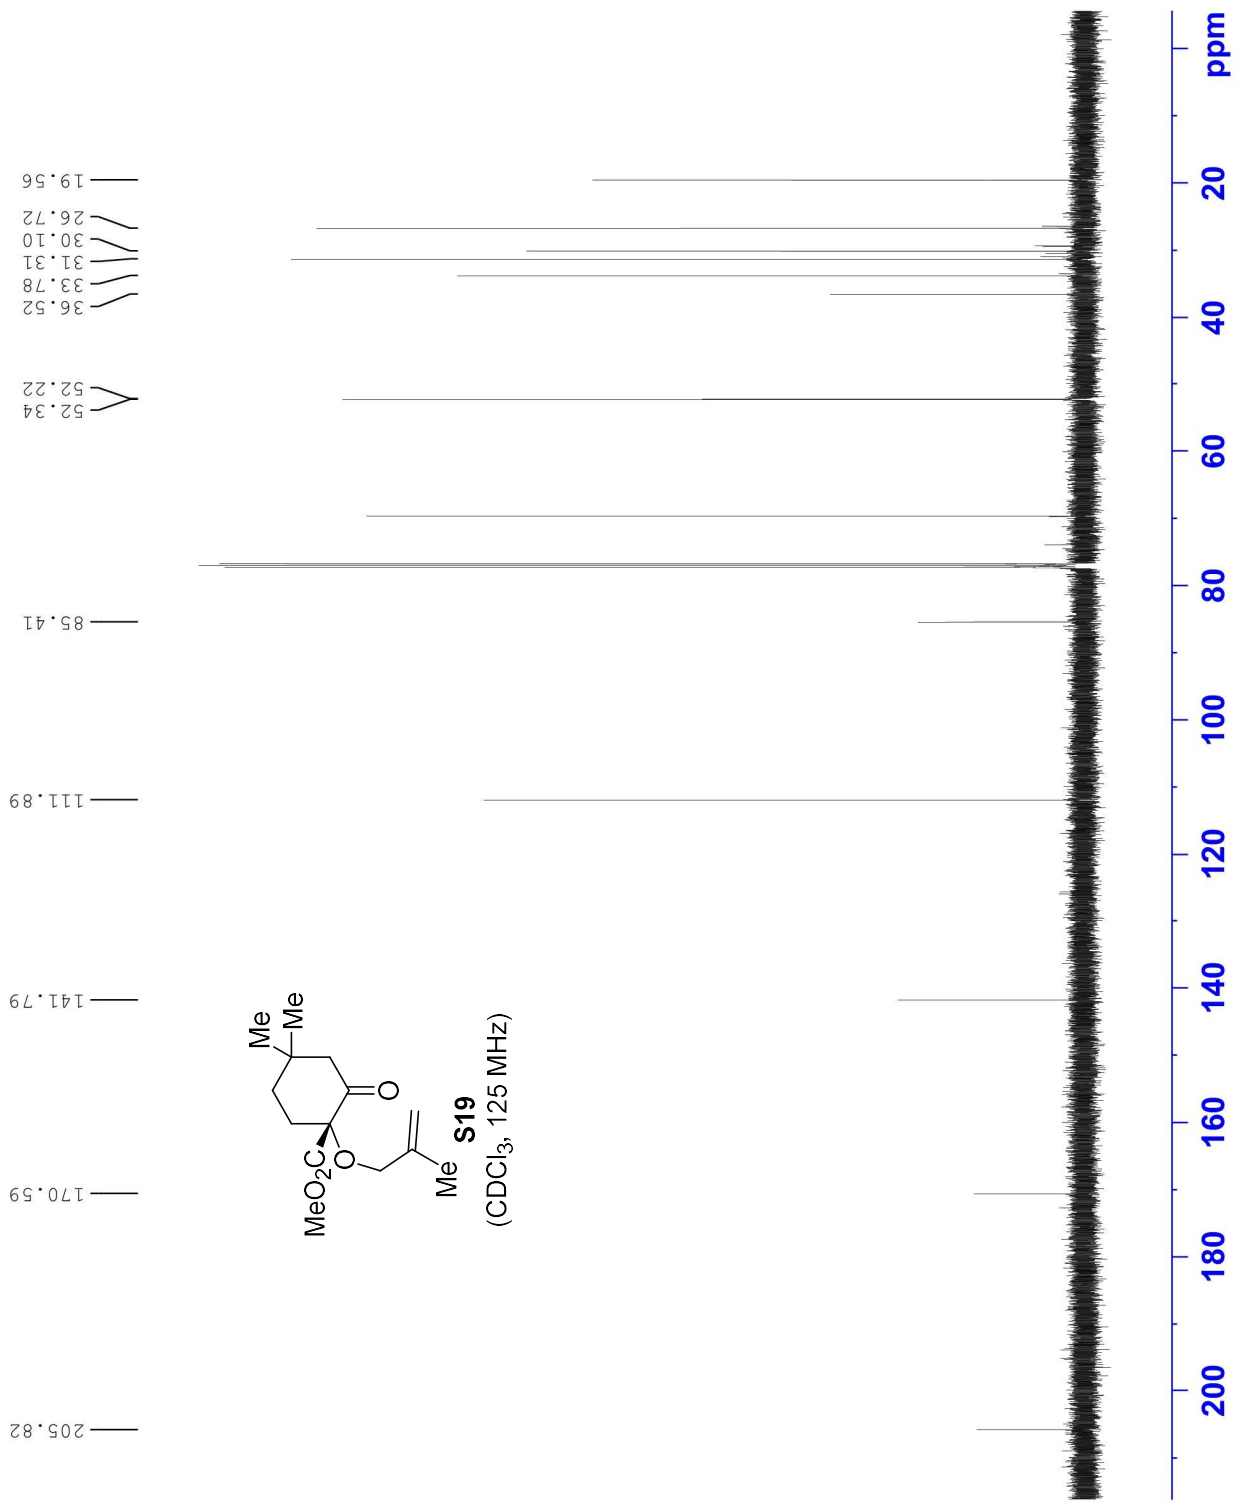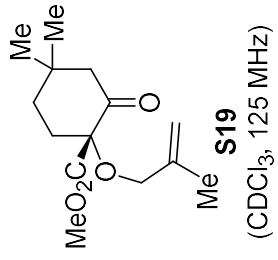

Current Data Parameters  
 NAME Yh-5-87-C  
 EXPNO 1  
 PROCNO 1

F2 - Acquisition Parameters  
 Date\_ 20190712  
 Time\_ 21.21  
 INSTRUM spect  
 PROBHD 5 mm PABBO BB/  
 PULPROG zg  
 TD 59998  
 SOLVENT CDC13  
 NS 2  
 DS 0  
 SWH 10000.000 Hz  
 FIDRES 0.166672 Hz  
 AQ 2.9999001 sec  
 RG 100.96  
 DW 50.000 usec  
 DE 6.50 usec  
 TE 297.5 K  
 D1 4.0000000 sec  
 TD0 1

==== CHANNEL f1 =====  
 SFO1 499.8730869 MHz  
 NUC1 1H  
 P1 3.58 usec  
 PLW1 18.2500000 W

F2 - Processing parameters  
 SI 65536  
 SF 499.8700122 MHz  
 WDW EM  
 SSB 0  
 LB 0.30 Hz  
 GB 0  
 PC 1.00

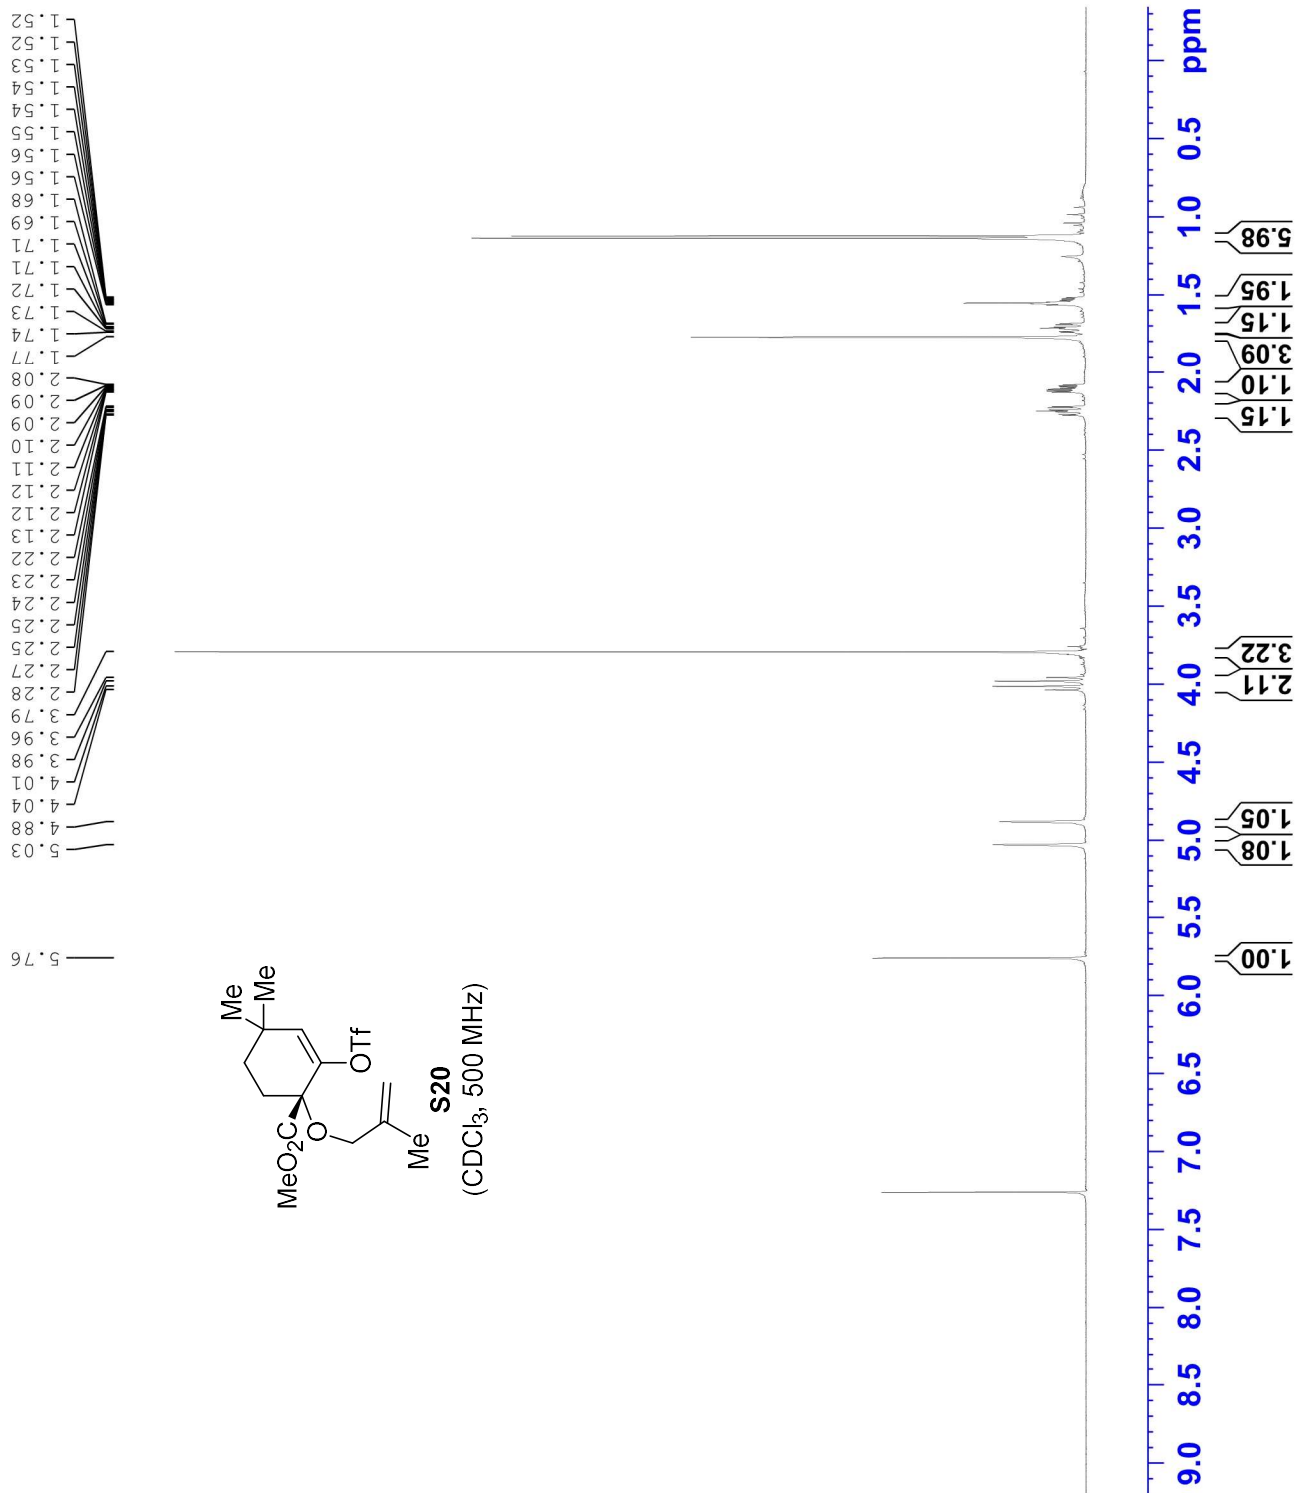

Current Data Parameters  
 NAME Yh-5-87-C  
 EXPNO 3  
 PROCNO 3

F2 - Acquisition Parameters  
 Date\_ 20190713  
 Time\_ 0.02  
 INSTRUM spect  
 PROBHD 5 mm PABBO BB/  
 PULPROG zgdc  
 TD 187496  
 SOLVENT CDC13  
 NS 803  
 DS 0  
 SWH 31250.000 Hz  
 FIDRES 0.166670 Hz  
 AQ 2.9999361 sec  
 RG 2050  
 DW 16.000 usec  
 DE 6.50 usec  
 TE 299.5 K  
 D1 3.00000000 sec  
 D11 0.03000000 sec  
 TD0 1

==== CHANNEL f1 =====  
 SFO1 125.7049802 MHz  
 NUC1 13C  
 P1 10.00 usec  
 PLW1 72.83999634 W

==== CHANNEL f2 =====  
 SFO2 499.8724993 MHz  
 NUC2 1H  
 CPDPRG[2] waltz16  
 PCPD2 80.00 usec  
 PLW2 19.00000000 W  
 PLW12 0.29688001 W

F2 - Processing parameters  
 SI 1048576  
 SF 125.6924115 MHz  
 WDW EM  
 SSB 0  
 LB 0.30 Hz  
 GB 0  
 PC 1.40

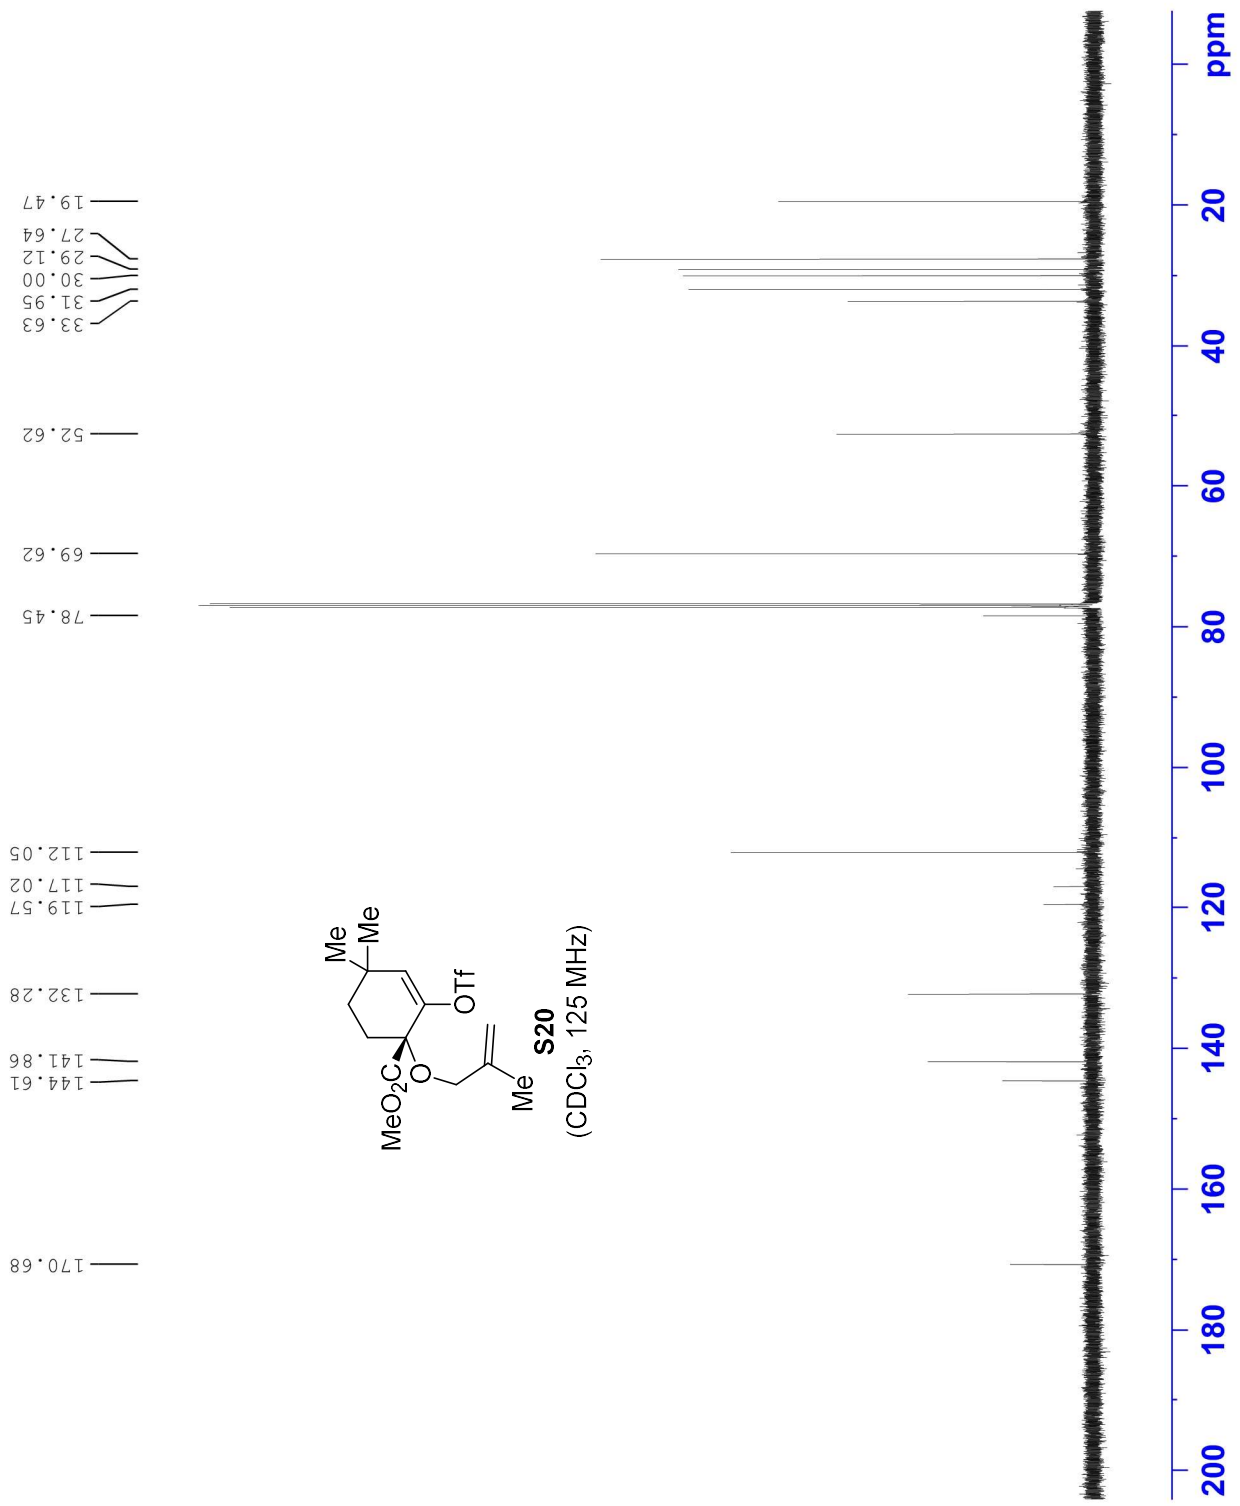



Current Data Parameters  
 NAME Yh-7-32-a  
 EXPNO 1  
 PROCNO 1

F2 - Acquisition Parameters

Date\_ 20191010  
 Time\_ 13.42  
 INSTRUM spect  
 PROBHD 5 mm PATXI 1H/  
 PULPROG zg  
 TD 59998  
 SOLVENT CDC13  
 NS 4  
 DS 0  
 SWH 10000.000 Hz  
 FIDRES 0.166672 Hz  
 AQ 2.9999001 sec  
 RG 196.79  
 DW 50.000 usec  
 DE 10.00 usec  
 TE 297.0 K  
 D1 4.00000000 sec  
 TD0 1

==== CHANNEL f1 =====  
 SF01 500.1330885 MHz  
 NUC1 1H  
 P1 3.30 usec  
 PLW1 12.19999981 W

F2 - Processing parameters  
 SI 65536  
 SF 500.1300135 MHz  
 WDW EM  
 SSB 0  
 LB 0.30 Hz  
 GB 0  
 PC 1.00

1.66  
1.64  
1.63  
1.63  
1.62  
1.61  
1.59  
1.44  
1.43  
1.41  
1.40  
1.38  
1.37  
1.09  
1.06

3.36  
3.34  
3.32

8.10  
8.09  
8.08  
7.31  
7.30  
7.29  
7.29  
7.29  
7.28  
7.28  
7.28

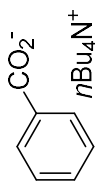

**S21**  
 (CDCl<sub>3</sub>, 500 MHz)

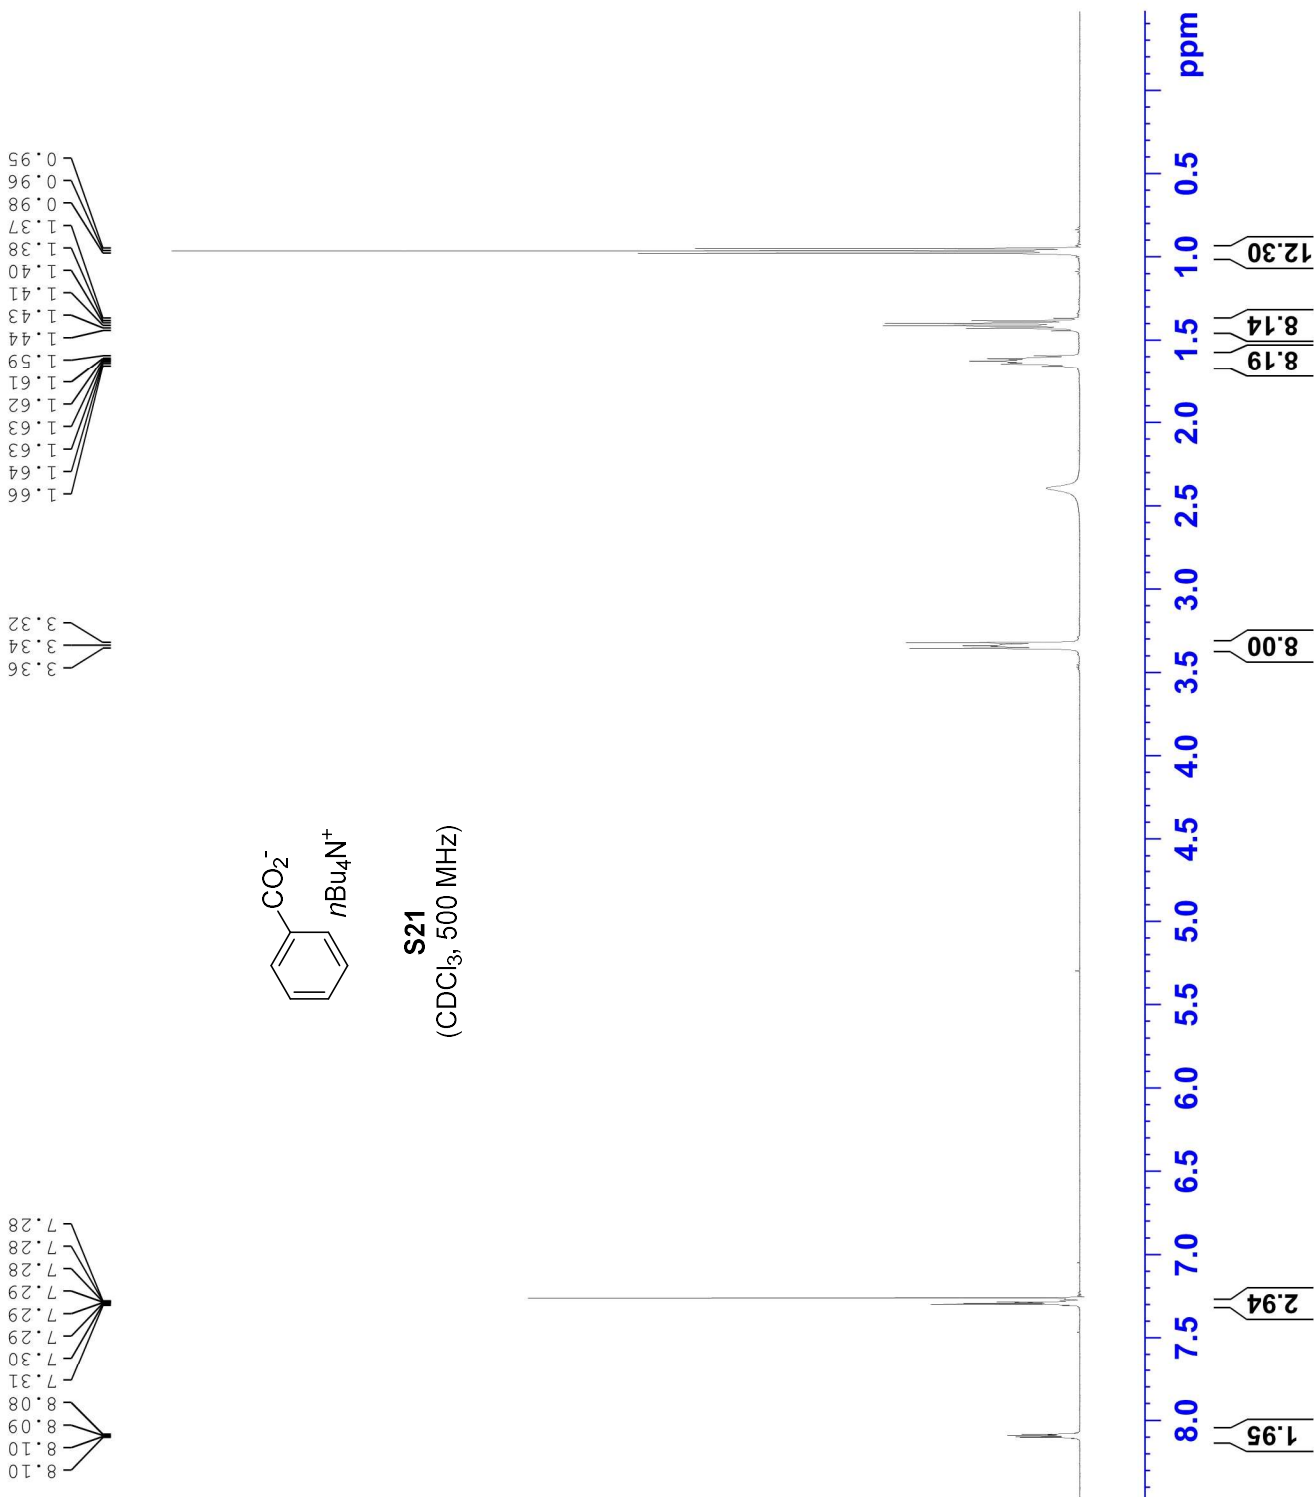

Current Data Parameters  
 NAME Yh-7-32  
 EXPNO 2  
 PROCNO 1

F2 - Acquisition Parameters  
 Date\_ 20191005  
 Time\_ 15.02 h  
 INSTRUM spect  
 PROBHD Z113652\_0187 (  
 PULPROG zgdc  
 TD 187496  
 SOLVENT CDC13  
 NS 153  
 DS 0  
 SWH 31250.000 Hz  
 FIDRES 0.333340 Hz  
 AQ 2.9999361 sec  
 RG 2050  
 DW 16.000 usec  
 DE 6.50 usec  
 TE 296.7 K  
 D1 3.0000000 sec  
 D11 0.0300000 sec  
 TD0 1  
 SFO1 125.7049802 MHz  
 NUC1 13C  
 P1 10.00 usec  
 PLW1 72.83999634 W  
 SFO2 499.8724993 MHz  
 NUC2 1H  
 CPDPRG12 waltz16  
 PCPD2 80.00 usec  
 PLW2 19.00000000 W  
 PLW12 0.29688001 W

F2 - Processing parameters  
 SI 1048576  
 SF 125.6924115 MHz  
 WDW EM  
 SSB 0  
 LB 0.30 Hz  
 GB 0  
 PC 1.40

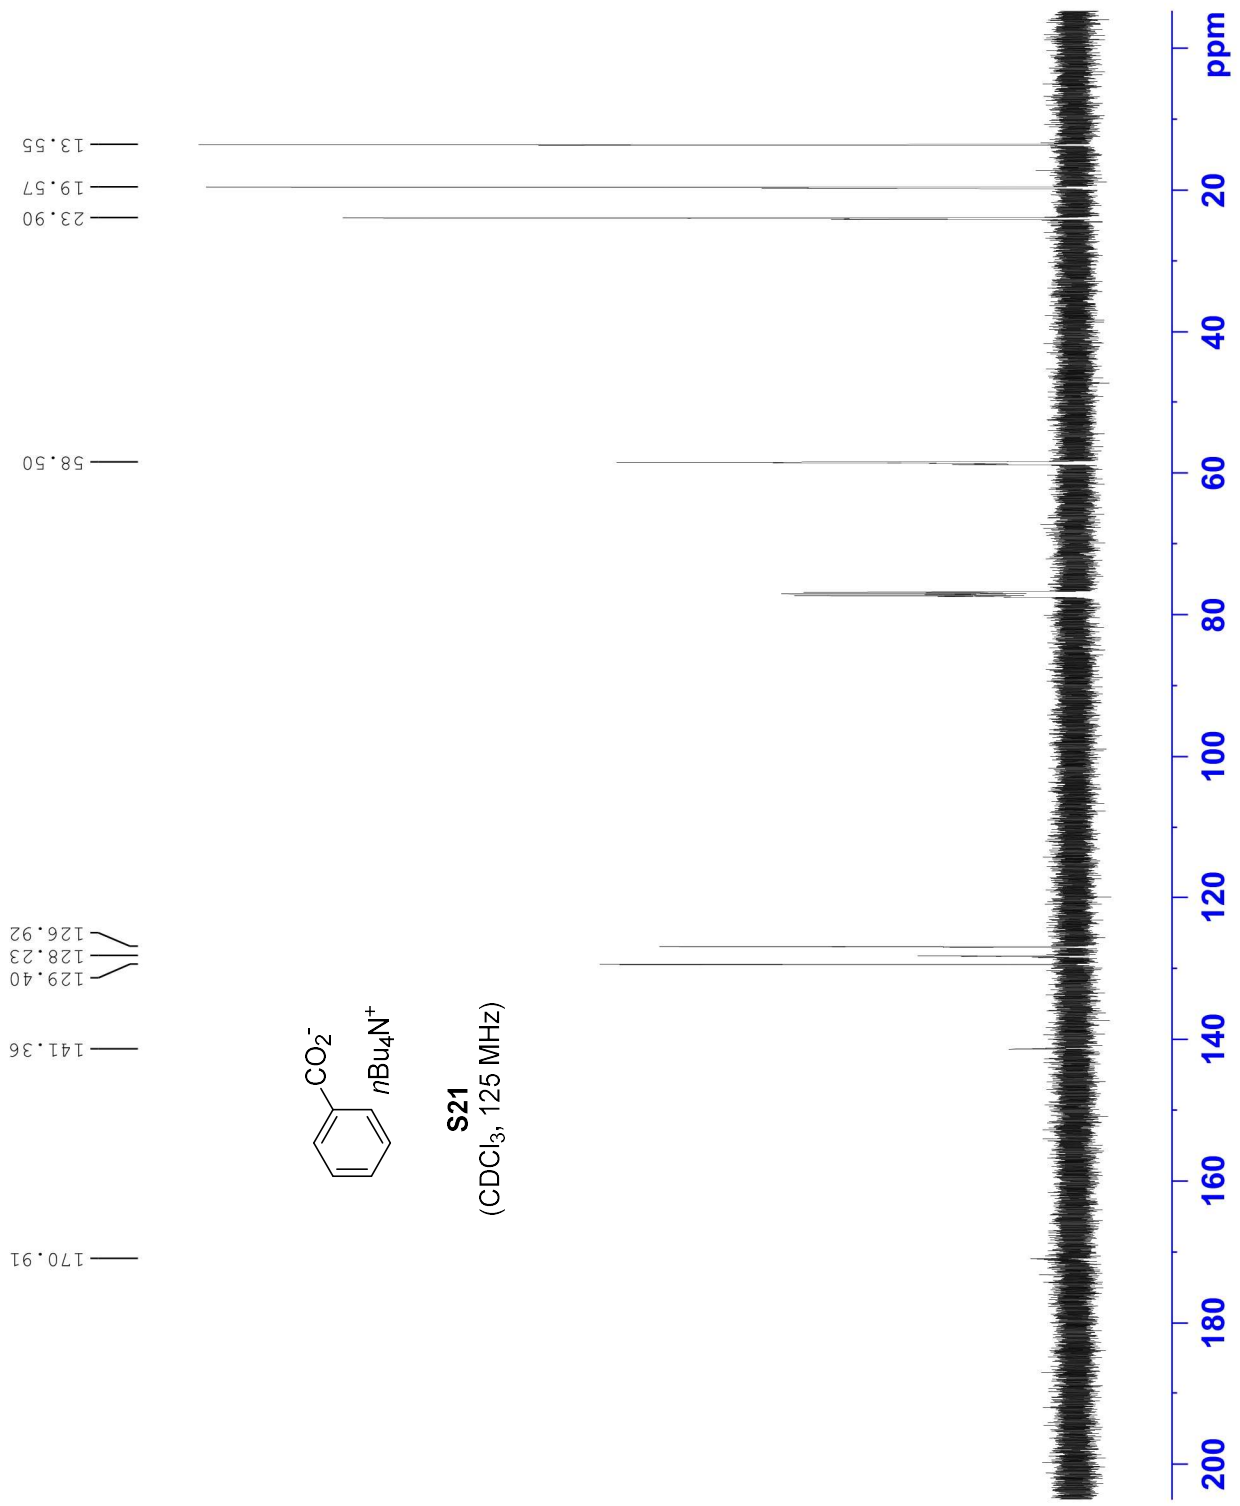

Current Data Parameters  
 NAME yh-2-41  
 EXPNO 1  
 PROCNO 1

F2 - Acquisition Parameters  
 Date\_ 20180814  
 Time\_ 14.39  
 INSTRUM spect  
 PROBHD 5 mm PATXI 1H/  
 PULPROG zg  
 TD 59998  
 SOLVENT CDC13  
 NS 4  
 DS 0  
 SWH 10000.000 Hz  
 FIDRES 0.166672 Hz  
 AQ 2.9999001 sec  
 RG 9.88  
 DW 50.000 usec  
 DE 10.00 usec  
 TE 294.3 K  
 D1 4.00000000 sec  
 TD0 1

==== CHANNEL f1 =====  
 SF01 500.1330885 MHz  
 NUC1 1H  
 P1 3.30 usec  
 PLW1 12.19999981 W

F2 - Processing parameters  
 SI 65536  
 SF 500.1299379 MHz  
 WDW EM  
 SSB 0  
 LB 0.30 Hz  
 GB 0  
 PC 1.00

2.23  
 1.40  
 1.39  
 1.38  
 1.36  
 1.35  
 1.25  
 1.24  
 1.22  
 1.21  
 0.84  
 0.83  
 0.81

3.30  
 3.03  
 3.02  
 3.00

6.99  
 6.97

7.86  
 7.84

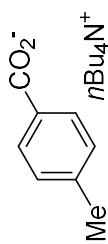

**S22**  
 (CDCl<sub>3</sub>, 500 MHz)

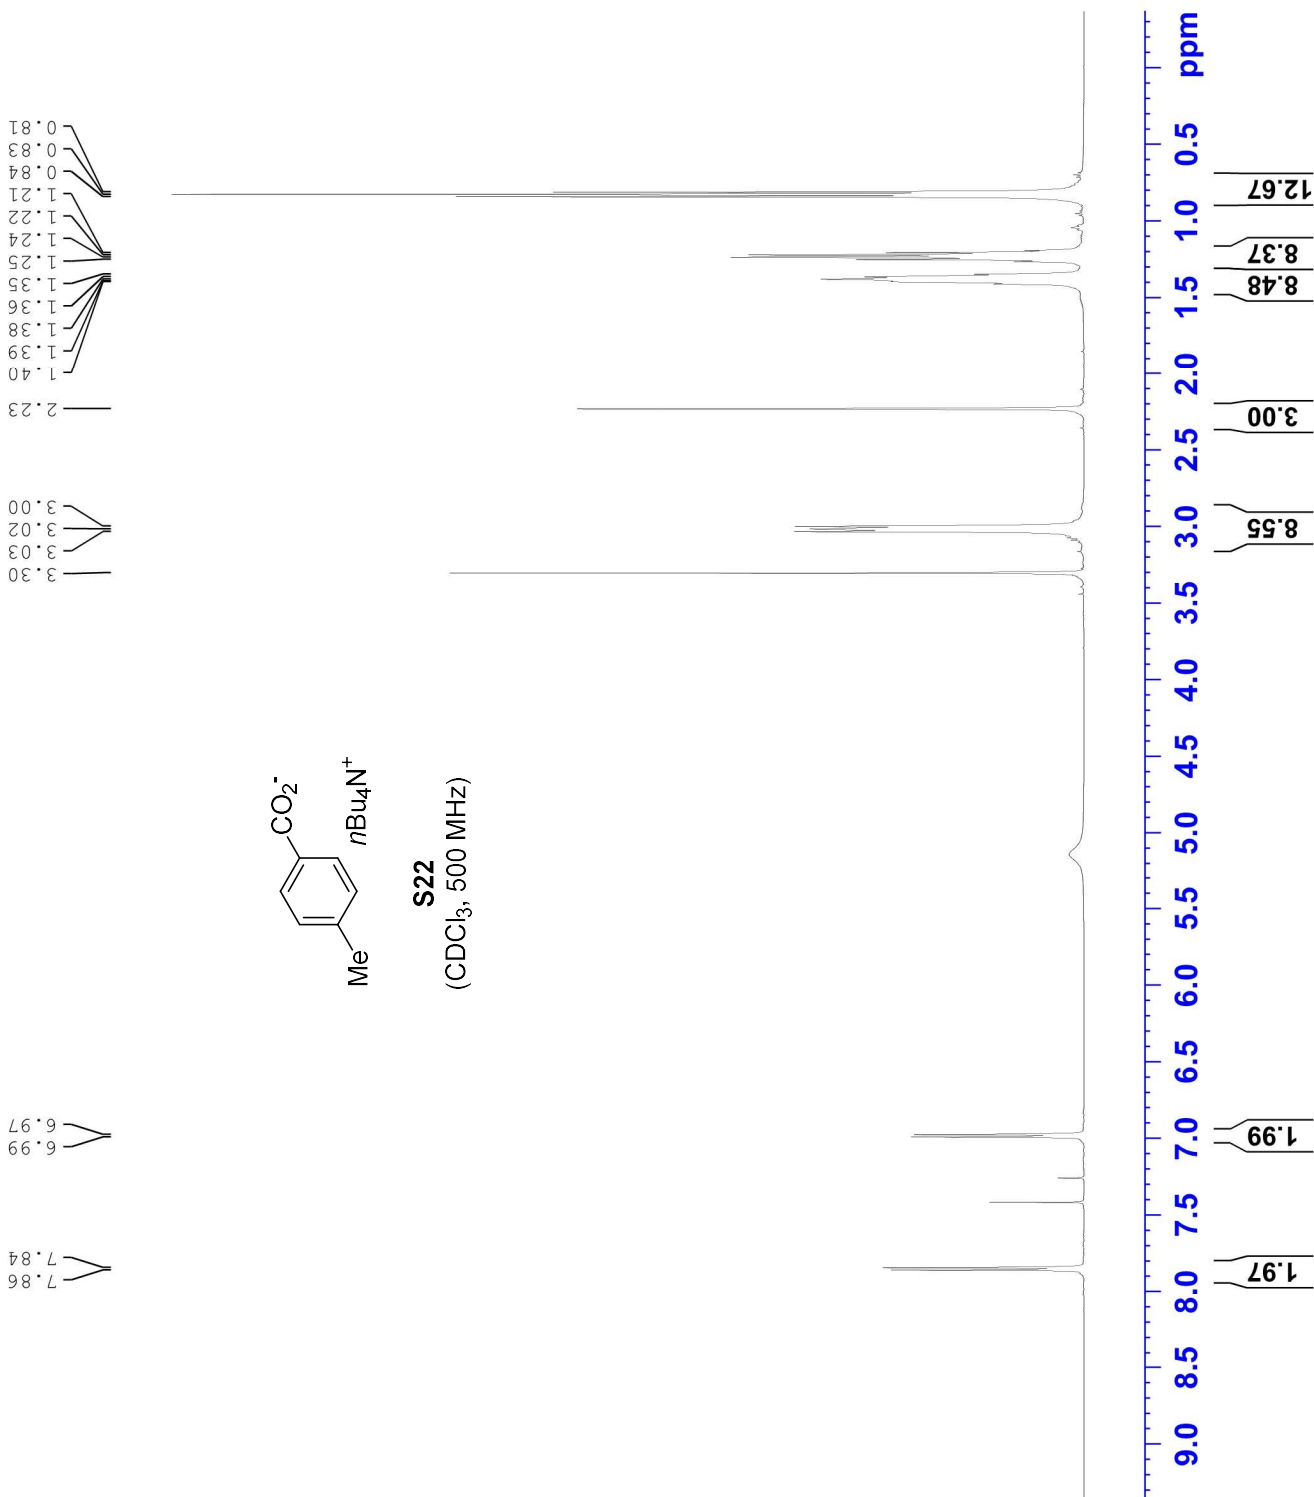

Current Data Parameters  
 NAME Yh-2-41  
 EXPNO 2  
 PROCNO 2

F2 - Acquisition Parameters  
 Date\_ 20180814  
 Time\_ 15.10  
 INSTRUM spect  
 PROBHD 5 mm PABBO BB/  
 PULPROG zgdc  
 TD 187496  
 SOLVENT CDC13  
 NS 5  
 DS 0  
 SWH 31250.000 Hz  
 FIDRES 0.166670 Hz  
 AQ 2.9999361 sec  
 RG 2050  
 DW 16.000 usec  
 DE 6.50 usec  
 TE 295.9 K  
 D1 3.0000000 sec  
 D11 0.0300000 sec  
 TD0 1

==== CHANNEL f1 =====  
 SFO1 125.7049802 MHz  
 NUC1 13C  
 P1 10.00 usec  
 PLW1 72.83999634 W

==== CHANNEL f2 =====  
 SFO2 499.8724993 MHz  
 NUC2 1H  
 CPDPRG[2] waltz16  
 PCPD2 80.00 usec  
 PLW2 19.00000000 W  
 PLW12 0.29688001 W

F2 - Processing parameters  
 SI 1048576  
 SF 125.6924115 MHz  
 WDW EM  
 SSB 0  
 LB 0.30 Hz  
 GB 0  
 PC 1.40

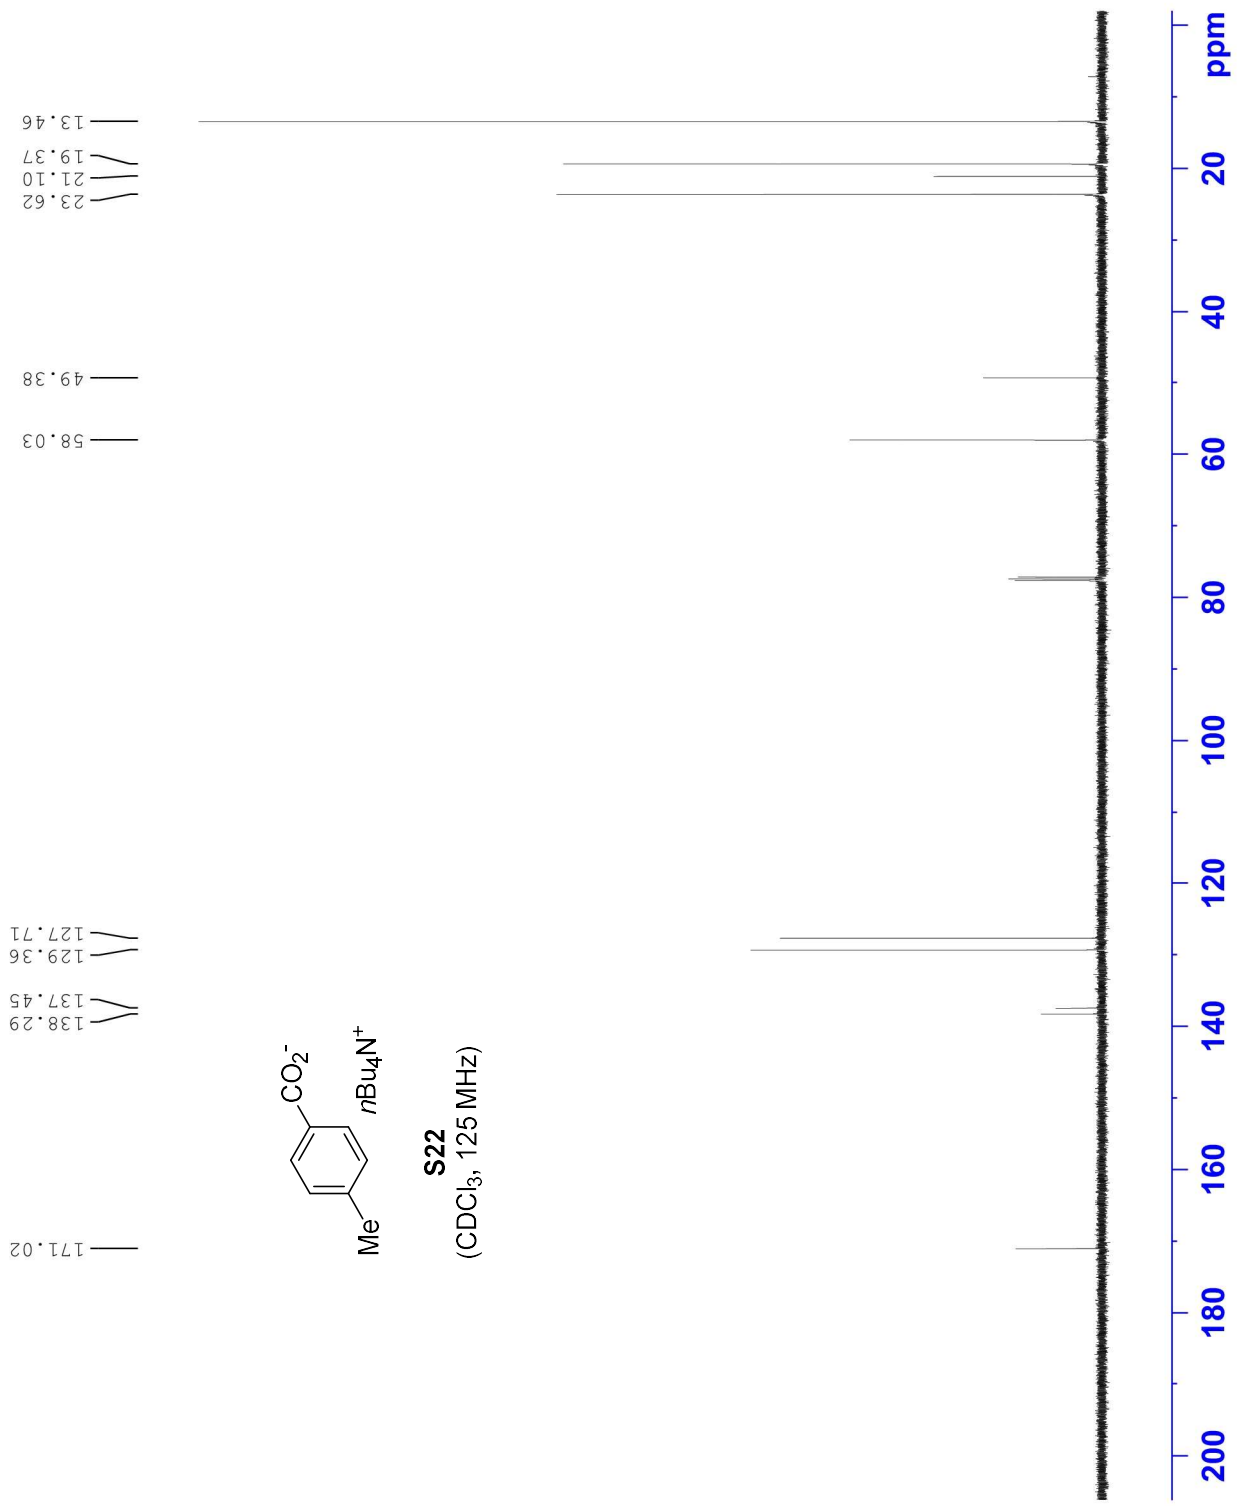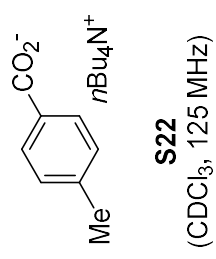

Current Data Parameters  
 NAME yh-2-29  
 EXPNO 1  
 PROCNO 1

F2 - Acquisition Parameters

Date\_ 20180827  
 Time\_ 20.40  
 INSTRUM spect  
 PROBHD 5 mm PABBO BB/  
 PULPROG zg  
 TD 59998  
 SOLVENT CDC13  
 NS 1  
 DS 0  
 SWH 10000.000 Hz  
 FIDRES 0.166672 Hz  
 AQ 2.9999001 sec  
 RG 13.94  
 DW 50.000 usec  
 DE 6.50 usec  
 TE 296.3 K  
 D1 4.00000000 sec  
 TD0 1

==== CHANNEL f1 =====  
 SF01 499.8730869 MHz  
 NUC1 1H  
 P1 3.58 usec  
 PLW1 18.25000000 W

F2 - Processing parameters  
 SI 65536  
 SF 499.8700148 MHz  
 WDW EM  
 SSB 0  
 LB 0.30 Hz  
 GB 0  
 PC 1.00

1.36  
1.34  
1.33  
1.32  
1.32  
1.32  
1.31  
1.29  
1.19  
1.18  
1.16  
1.15  
1.13  
1.12  
0.74

3.60  
3.01  
2.99  
2.97

6.61  
6.60  
6.60  
6.60  
6.59  
6.58  
6.58

7.87  
7.86  
7.86  
7.85  
7.84  
7.84

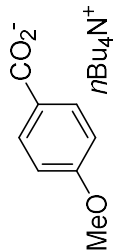

**S23**  
 (CDCl<sub>3</sub>, 500 MHz)

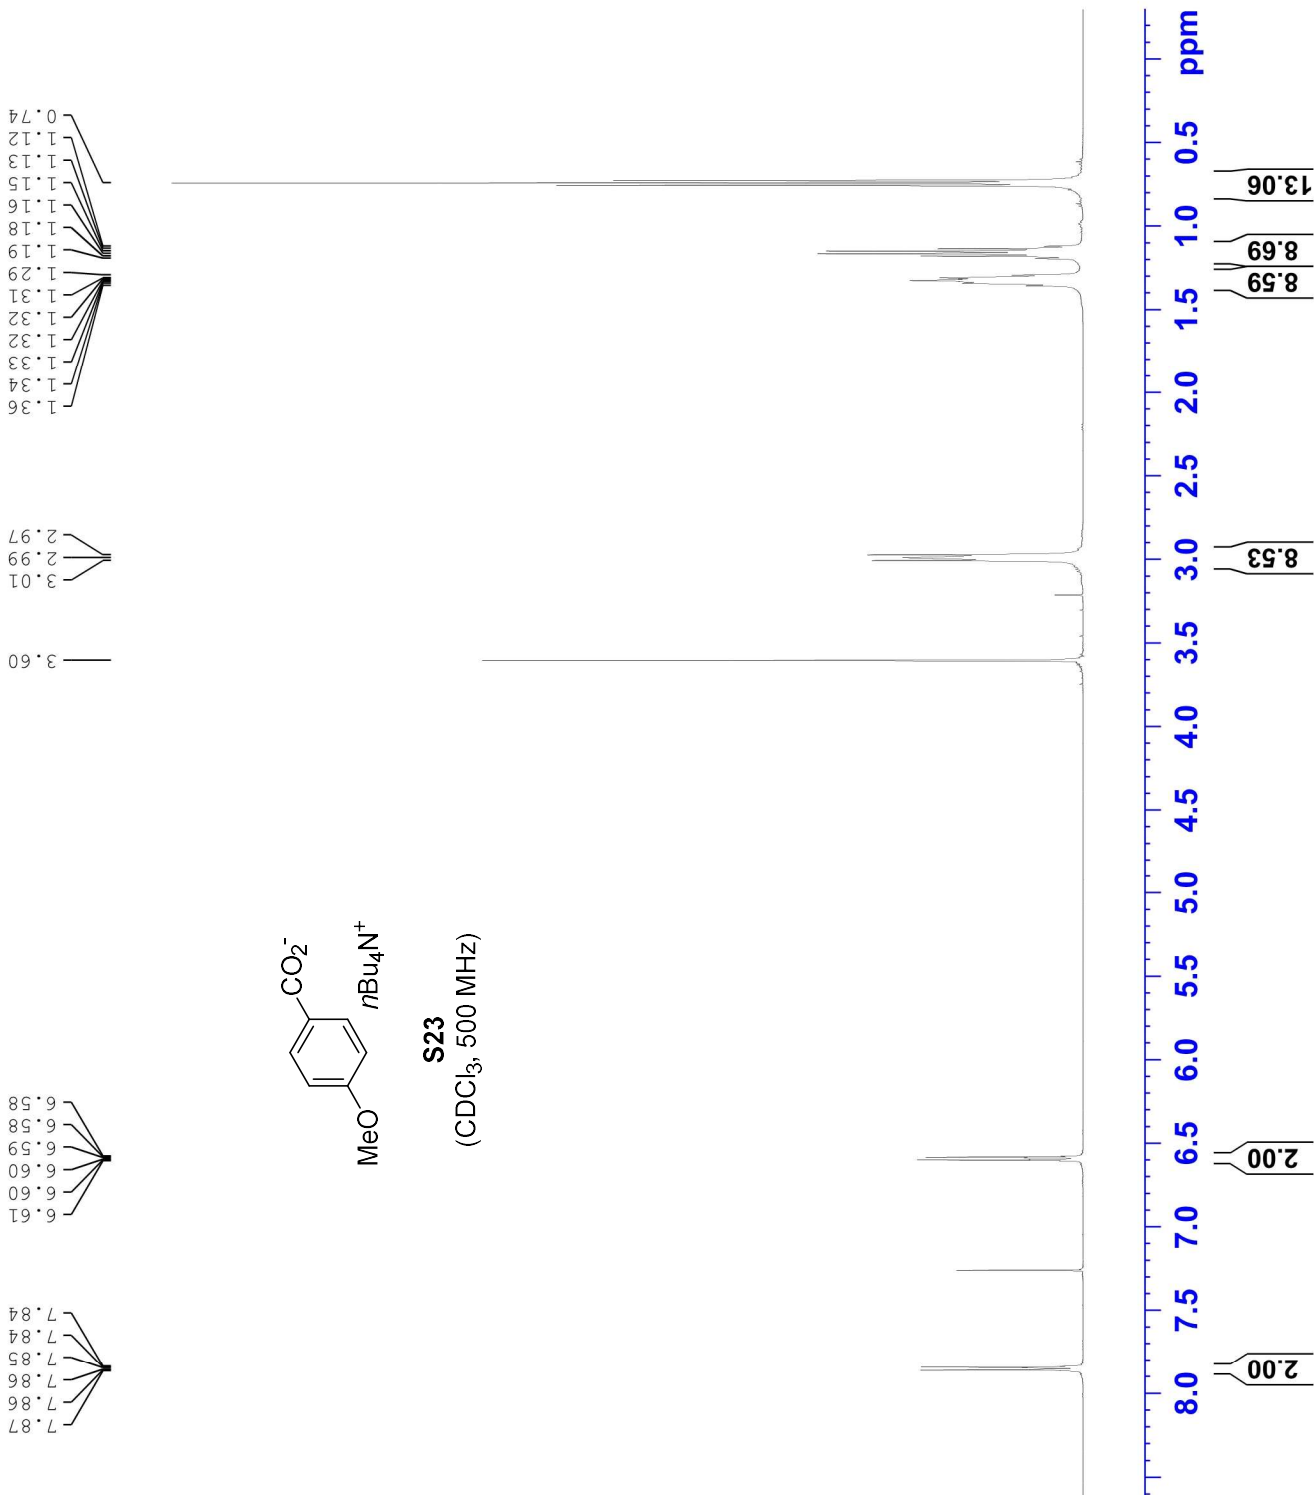

Current Data Parameters  
 NAME Yh-2-29  
 EXPNO 2  
 PROCNO 2

F2 - Acquisition Parameters

Date\_ 20180827  
 Time\_ 20.44  
 INSTRUM spect  
 PROBD 5 mm PABBO BB/  
 PULPROG zgdc  
 TD 187496  
 SOLVENT CDC13  
 NS 4  
 DS 0  
 SWH 31250.000 Hz  
 FIDRES 0.166670 Hz  
 AQ 2.9999361 sec  
 RG 2050  
 DW 16.000 usec  
 DE 6.50 usec  
 TE 296.3 K  
 D1 3.0000000 sec  
 D11 0.0300000 sec  
 TD0 1

==== CHANNEL f1 =====  
 SFO1 125.7049802 MHz  
 NUC1 13C  
 P1 10.00 usec  
 PLW1 72.83999634 W

==== CHANNEL f2 =====  
 SFO2 499.8724993 MHz  
 NUC2 1H  
 CPDPRG[2] waltz16  
 PCPD2 80.00 usec  
 PLW2 19.00000000 W  
 PLW12 0.29688001 W

F2 - Processing parameters  
 SI 1048576  
 SF 125.6924115 MHz  
 WDW EM  
 SSB 0  
 LB 0.30 Hz  
 GB 0  
 PC 1.40

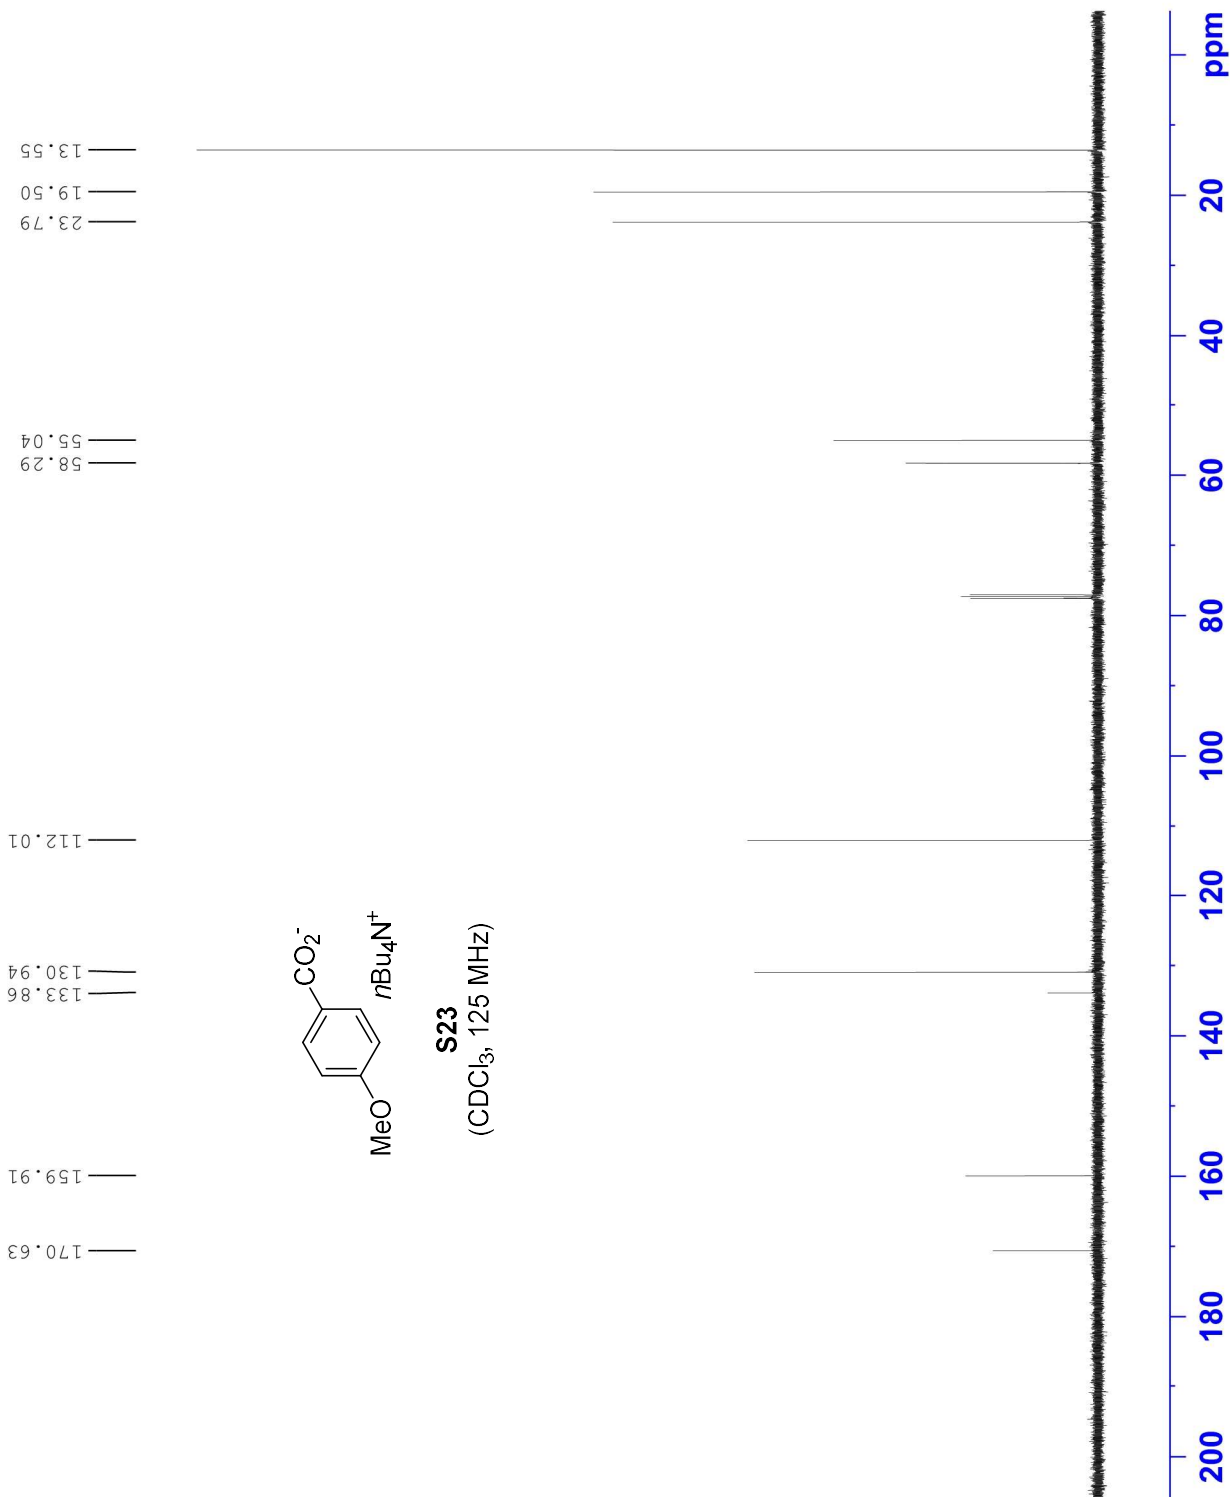

Current Data Parameters  
 NAME yh-2-58  
 EXPNO 1  
 PROCNO 1

F2 - Acquisition Parameters  
 Date\_ 20180814  
 Time\_ 21.20  
 INSTRUM spect  
 PROBHD 5 mm PABBO BB/  
 PULPROG zg  
 TD 59998  
 SOLVENT CDC13  
 NS 2  
 DS 0  
 SWH 10000.000 Hz  
 FIDRES 0.166672 Hz  
 AQ 2.9999001 sec  
 RG 22.37  
 DW 50.000 usec  
 DE 6.50 usec  
 TE 295.9 K  
 D1 4.0000000 sec  
 TD0 1

==== CHANNEL f1 =====  
 SF01 499.8730869 MHz  
 NUC1 1H  
 P1 3.58 usec  
 PLW1 18.25000000 W

F2 - Processing parameters  
 SI 65536  
 SF 499.8700130 MHz  
 WDW EM  
 SSB 0  
 LB 0.30 Hz  
 GB 0  
 PC 1.00

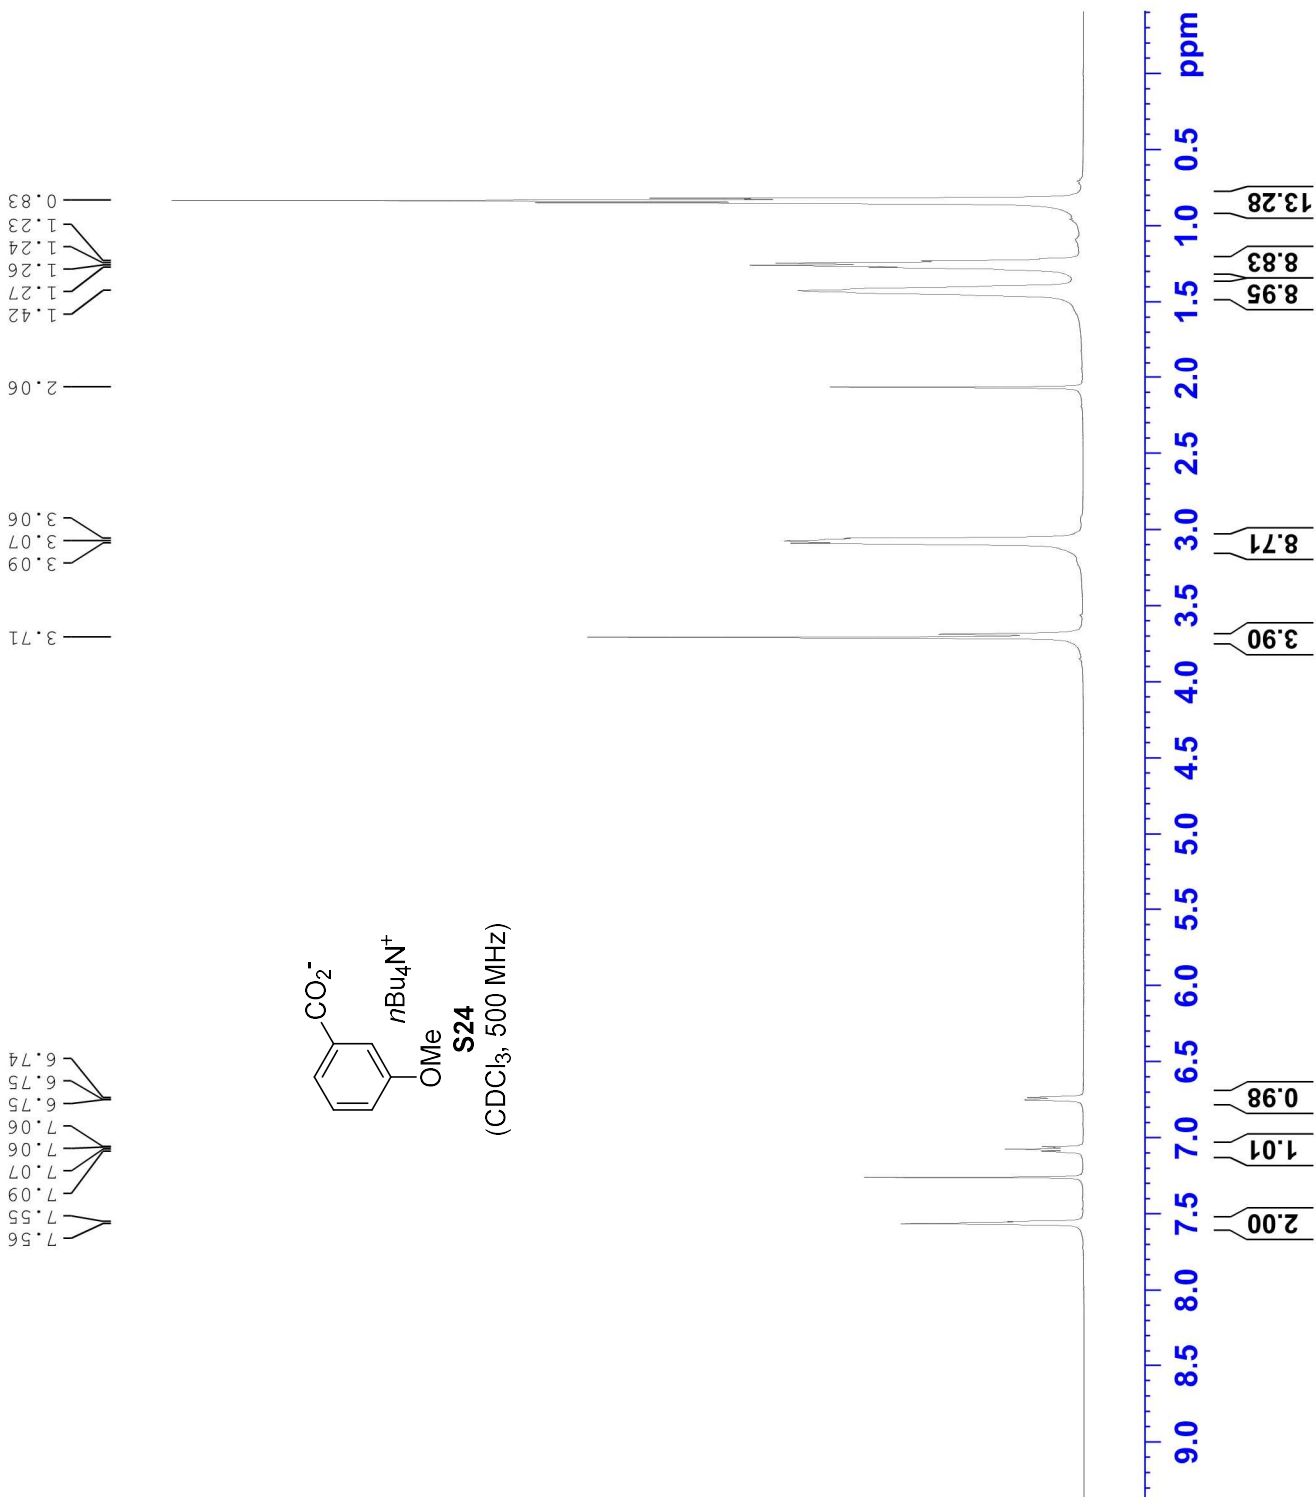

Current Data Parameters  
 NAME Yh-2-58  
 EXPNO 2  
 PROCNO 2

F2 - Acquisition Parameters

Date\_ 20180814  
 Time\_ 21.25  
 INSTRUM spect  
 PROBHD 5 mm PABBO BB/  
 PULPROG zgdc  
 TD 187496  
 SOLVENT CDC13  
 NS 6  
 DS 0  
 SWH 31250.000 Hz  
 FIDRES 0.166670 Hz  
 AQ 2.9999361 sec  
 RG 2050  
 DW 16.000 usec  
 DE 6.50 usec  
 TE 296.0 K  
 D1 3.00000000 sec  
 D11 0.03000000 sec  
 TD0 1

==== CHANNEL f1 =====  
 SFO1 125.7049802 MHz  
 NUC1 13C  
 P1 10.00 usec  
 PLW1 72.83999634 W

==== CHANNEL f2 =====  
 SFO2 499.8724993 MHz  
 NUC2 1H  
 CPDPRG[2] waltz16  
 PCPD2 80.00 usec  
 PLW2 19.00000000 W  
 PLW12 0.29688001 W

F2 - Processing parameters  
 SI 1048576  
 SF 125.6924115 MHz  
 EM  
 WDW 0  
 SSB 0  
 LB 0.30 Hz  
 GB 0  
 PC 1.40

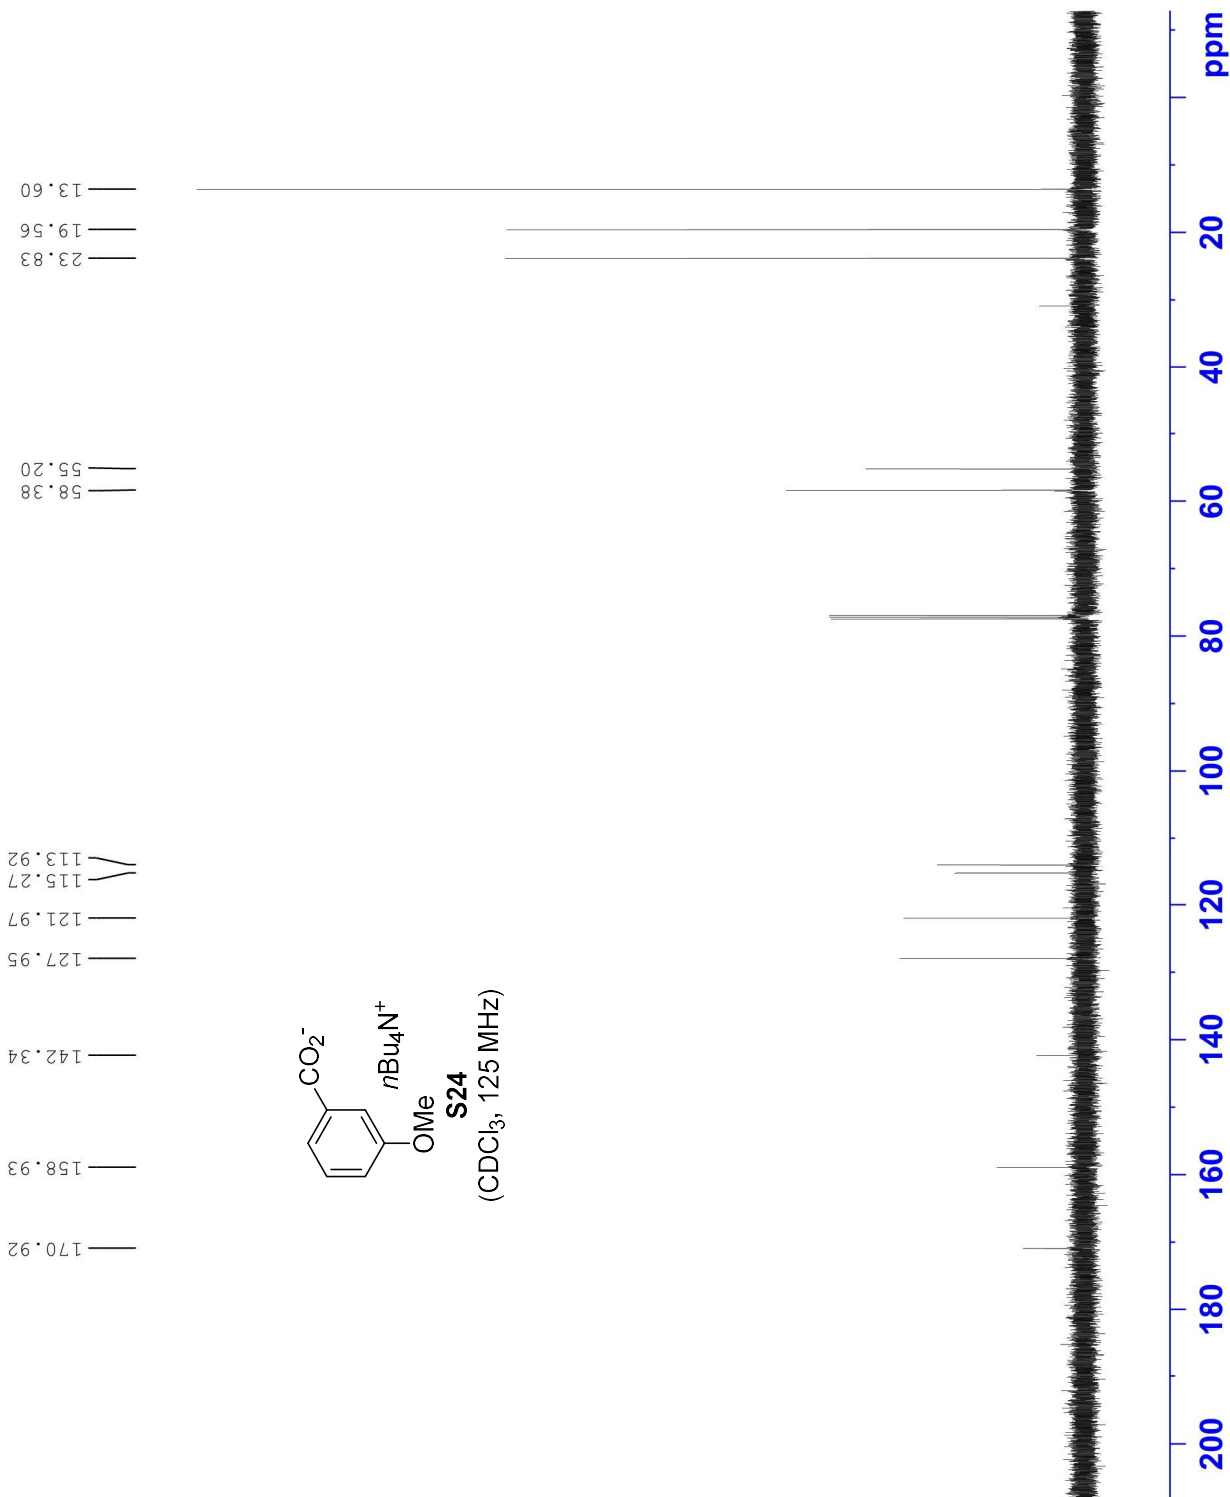



Current Data Parameters  
 NAME yh-2-75  
 EXPNO 1  
 PROCNO 1

F2 - Acquisition Parameters  
 Date\_ 20180814  
 Time\_ 22.45  
 INSTRUM spect  
 PROBHD 5 mm PABBO BB/  
 PULPROG zg  
 TD 59998  
 SOLVENT CDC13  
 NS 1  
 DS 0  
 SWH 10000.000 Hz  
 FIDRES 0.166672 Hz  
 AQ 2.9999001 sec  
 RG 25.24  
 DW 50.000 usec  
 DE 6.50 usec  
 TE 296.1 K  
 D1 4.00000000 sec  
 TD0 1

==== CHANNEL f1 =====  
 SF01 499.8730869 MHz  
 NUC1 1H  
 P1 3.58 usec  
 PLW1 18.25000000 W

F2 - Processing parameters  
 SI 65536  
 SF 499.8700126 MHz  
 WDW EM  
 SSB 0  
 LB 0.30 Hz  
 GB 0  
 PC 1.00

1.55  
1.54  
1.52  
1.51  
1.49  
1.34  
1.32  
1.31  
1.29  
1.28  
1.26  
0.86

3.21  
3.19  
3.17

8.13  
8.12  
7.74  
7.72

9.94

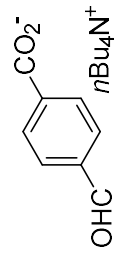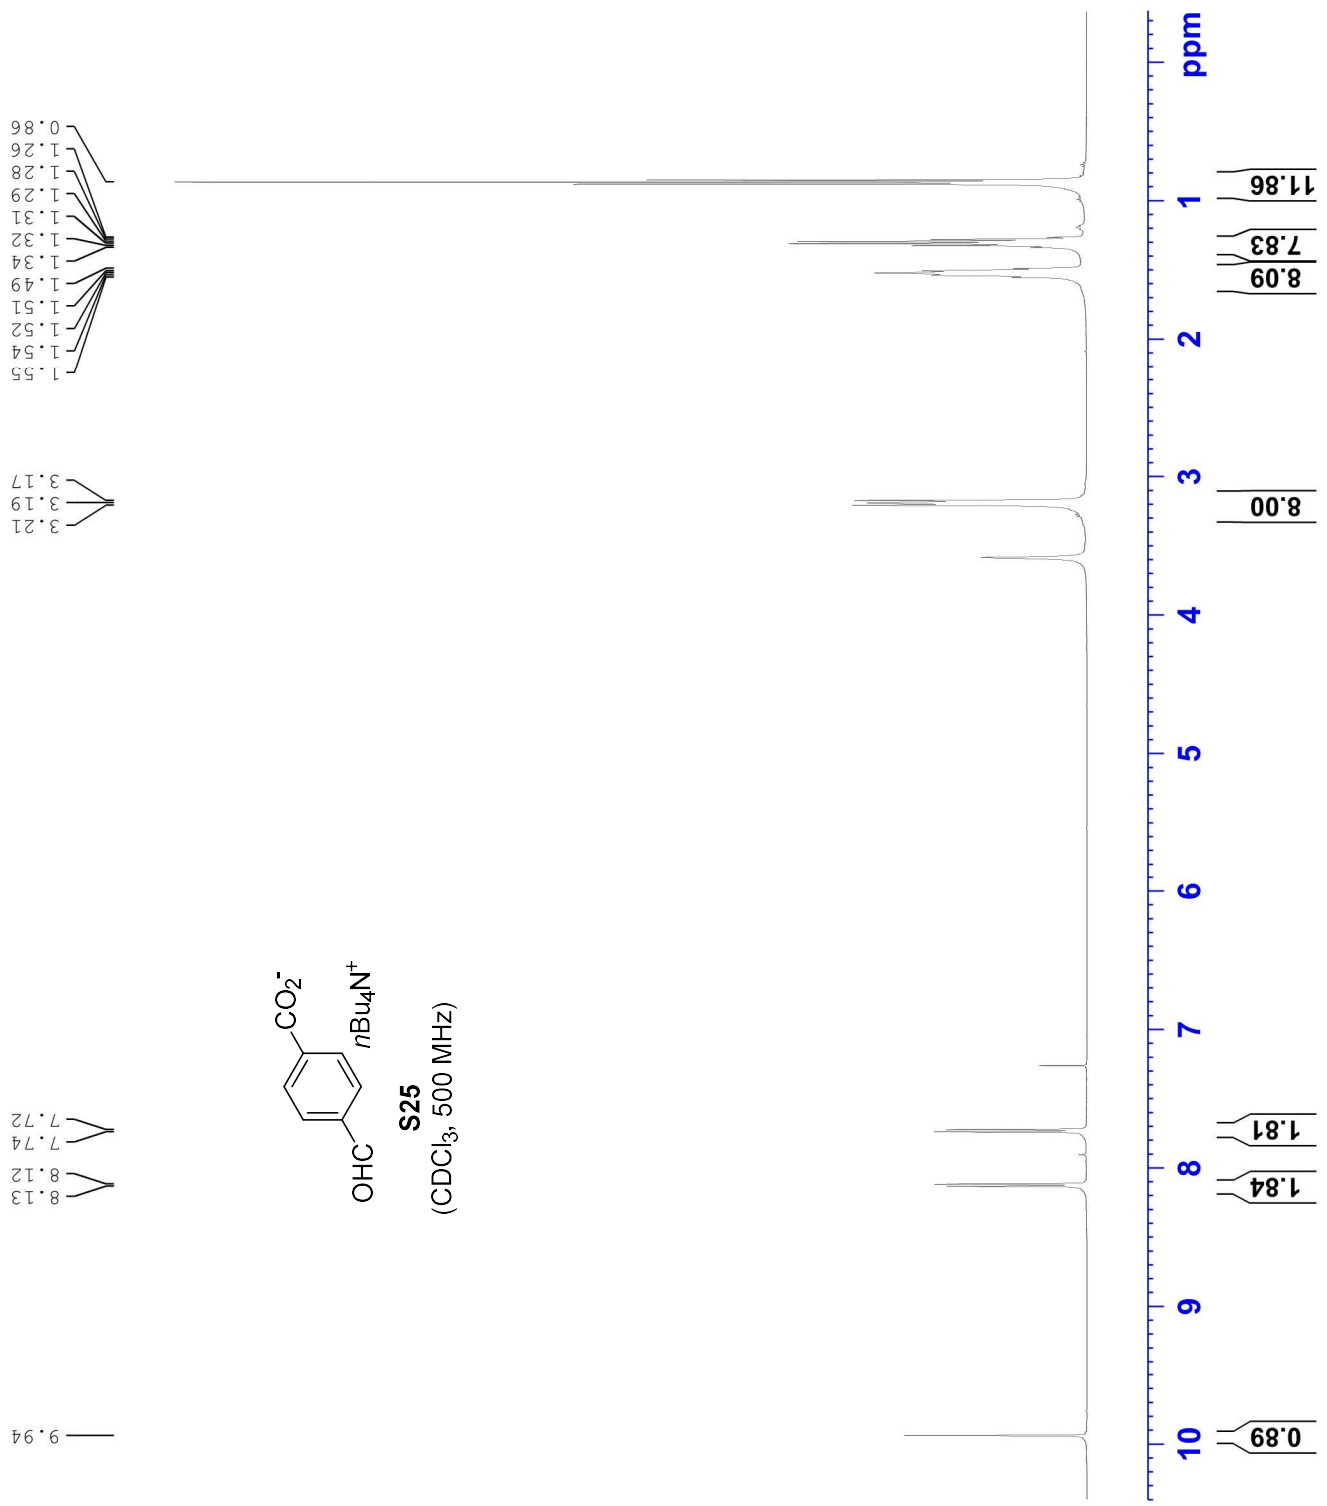

Current Data Parameters  
 NAME Yh-2-75  
 EXPNO 2  
 PROCNO 2

F2 - Acquisition Parameters  
 Date\_ 20180814  
 Time\_ 22.48  
 INSTRUM spect  
 PROBHD 5 mm PABBO BB/  
 PULPROG zgdc  
 TD 187496  
 SOLVENT CDC13  
 NS 3  
 DS 0  
 SWH 31250.000 Hz  
 FIDRES 0.166670 Hz  
 AQ 2.9999361 sec  
 RG 2050  
 DW 16.000 usec  
 DE 6.50 usec  
 TE 296.1 K  
 D1 3.00000000 sec  
 D11 0.03000000 sec  
 TD0 1

==== CHANNEL f1 =====  
 SFO1 125.7049802 MHz  
 NUC1 13C  
 P1 10.00 usec  
 PLW1 72.83999634 W

==== CHANNEL f2 =====  
 SFO2 499.8724993 MHz  
 NUC2 1H  
 CPDPRG[2] waltz16  
 PCPD2 80.00 usec  
 PLW2 19.00000000 W  
 PLW12 0.29688001 W

F2 - Processing parameters  
 SI 1048576  
 SF 125.6924115 MHz  
 EM  
 WDW 0  
 SSB 0  
 LB 0.30 Hz  
 GB 0  
 PC 1.40

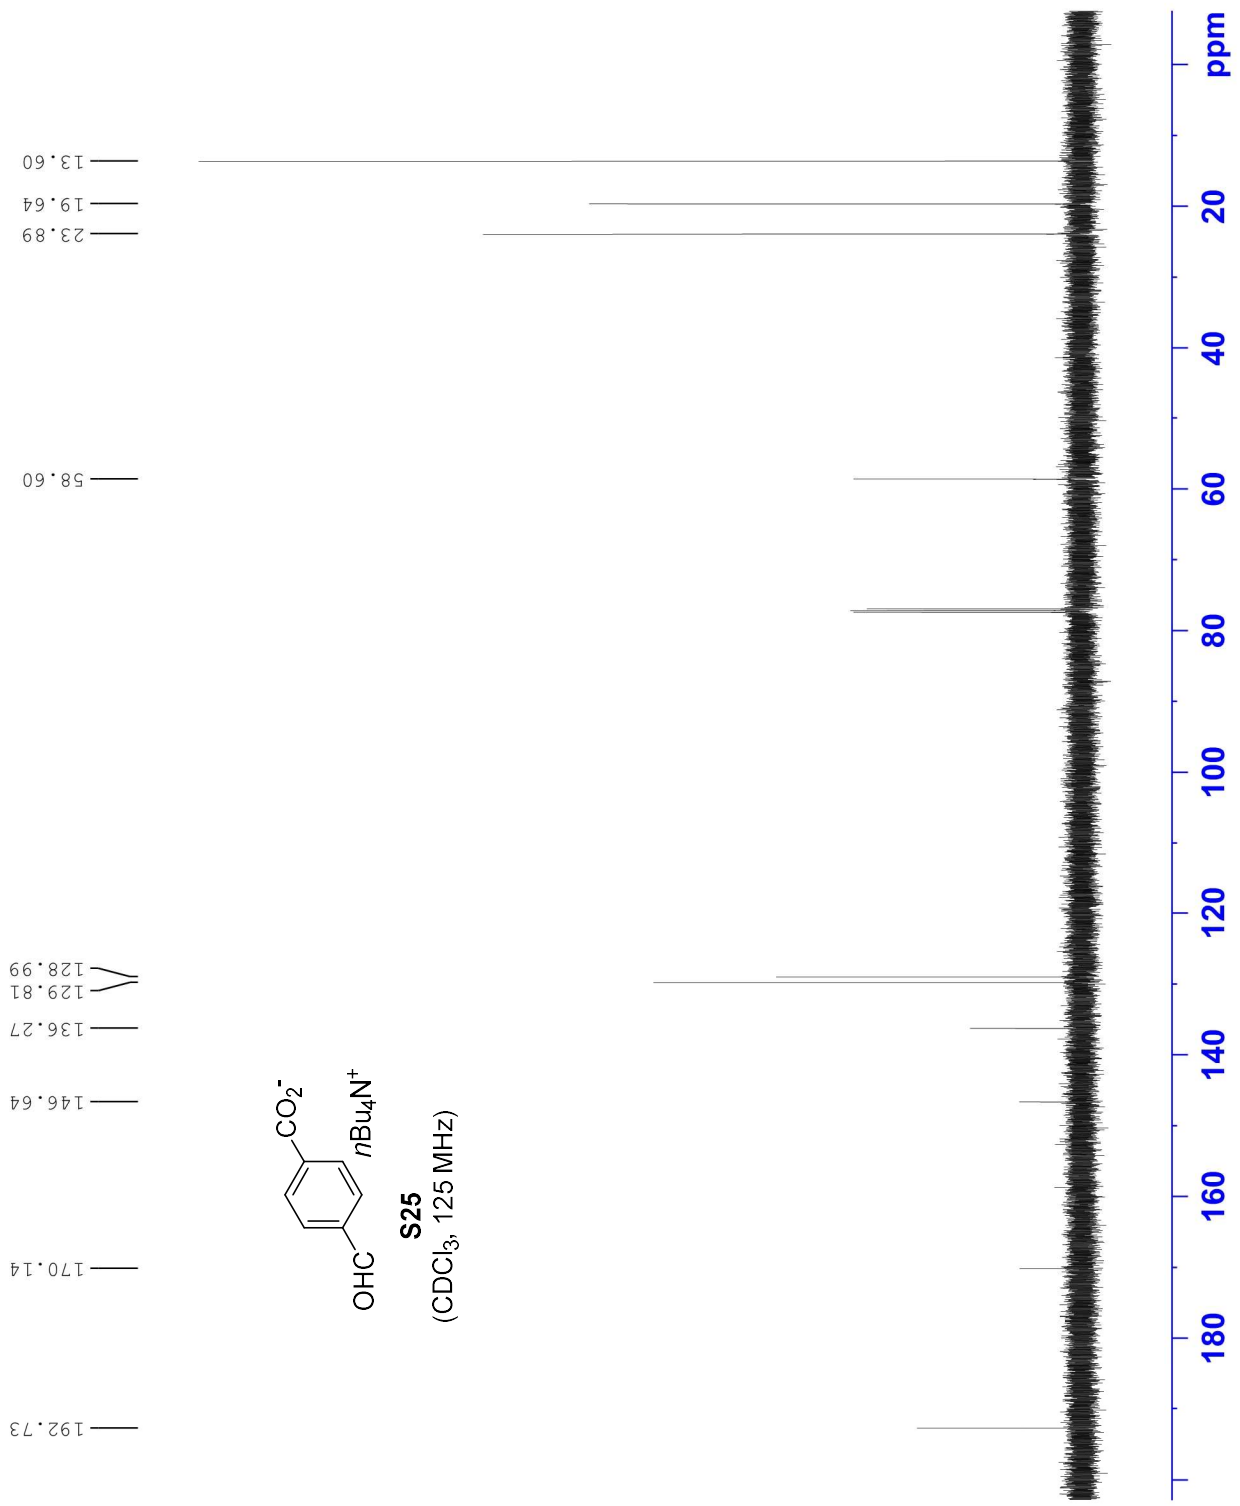

Current Data Parameters  
 NAME yh-2-53  
 EXPNO 1  
 PROCNO 1

F2 - Acquisition Parameters  
 Date\_ 20180814  
 Time\_ 16.03  
 INSTRUM spect  
 PROBHD 5 mm PABBO BB/  
 PULPROG zg  
 TD 59998  
 SOLVENT CDC13  
 NS 1  
 DS 0  
 SWH 10000.000 Hz  
 FIDRES 0.166672 Hz  
 AQ 2.9999001 sec  
 RG 13.94  
 DW 50.000 usec  
 DE 6.50 usec  
 TE 295.8 K  
 D1 4.0000000 sec  
 TD0 1

==== CHANNEL f1 =====  
 SF01 499.8730869 MHz  
 NUC1 1H  
 P1 3.58 usec  
 PLW1 18.2500000 W

F2 - Processing parameters  
 SI 65536  
 SF 499.8700143 MHz  
 WDW EM  
 SSB 0  
 LB 0.30 Hz  
 GB 0  
 PC 1.00

1.43  
1.42  
1.40  
1.39  
1.37  
1.21  
1.20  
1.18  
1.17  
1.15  
1.14  
0.75  
0.74  
0.73

3.09  
3.07  
3.06

7.37  
7.35

7.96  
7.98

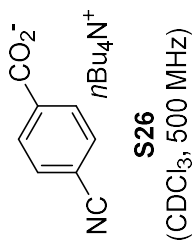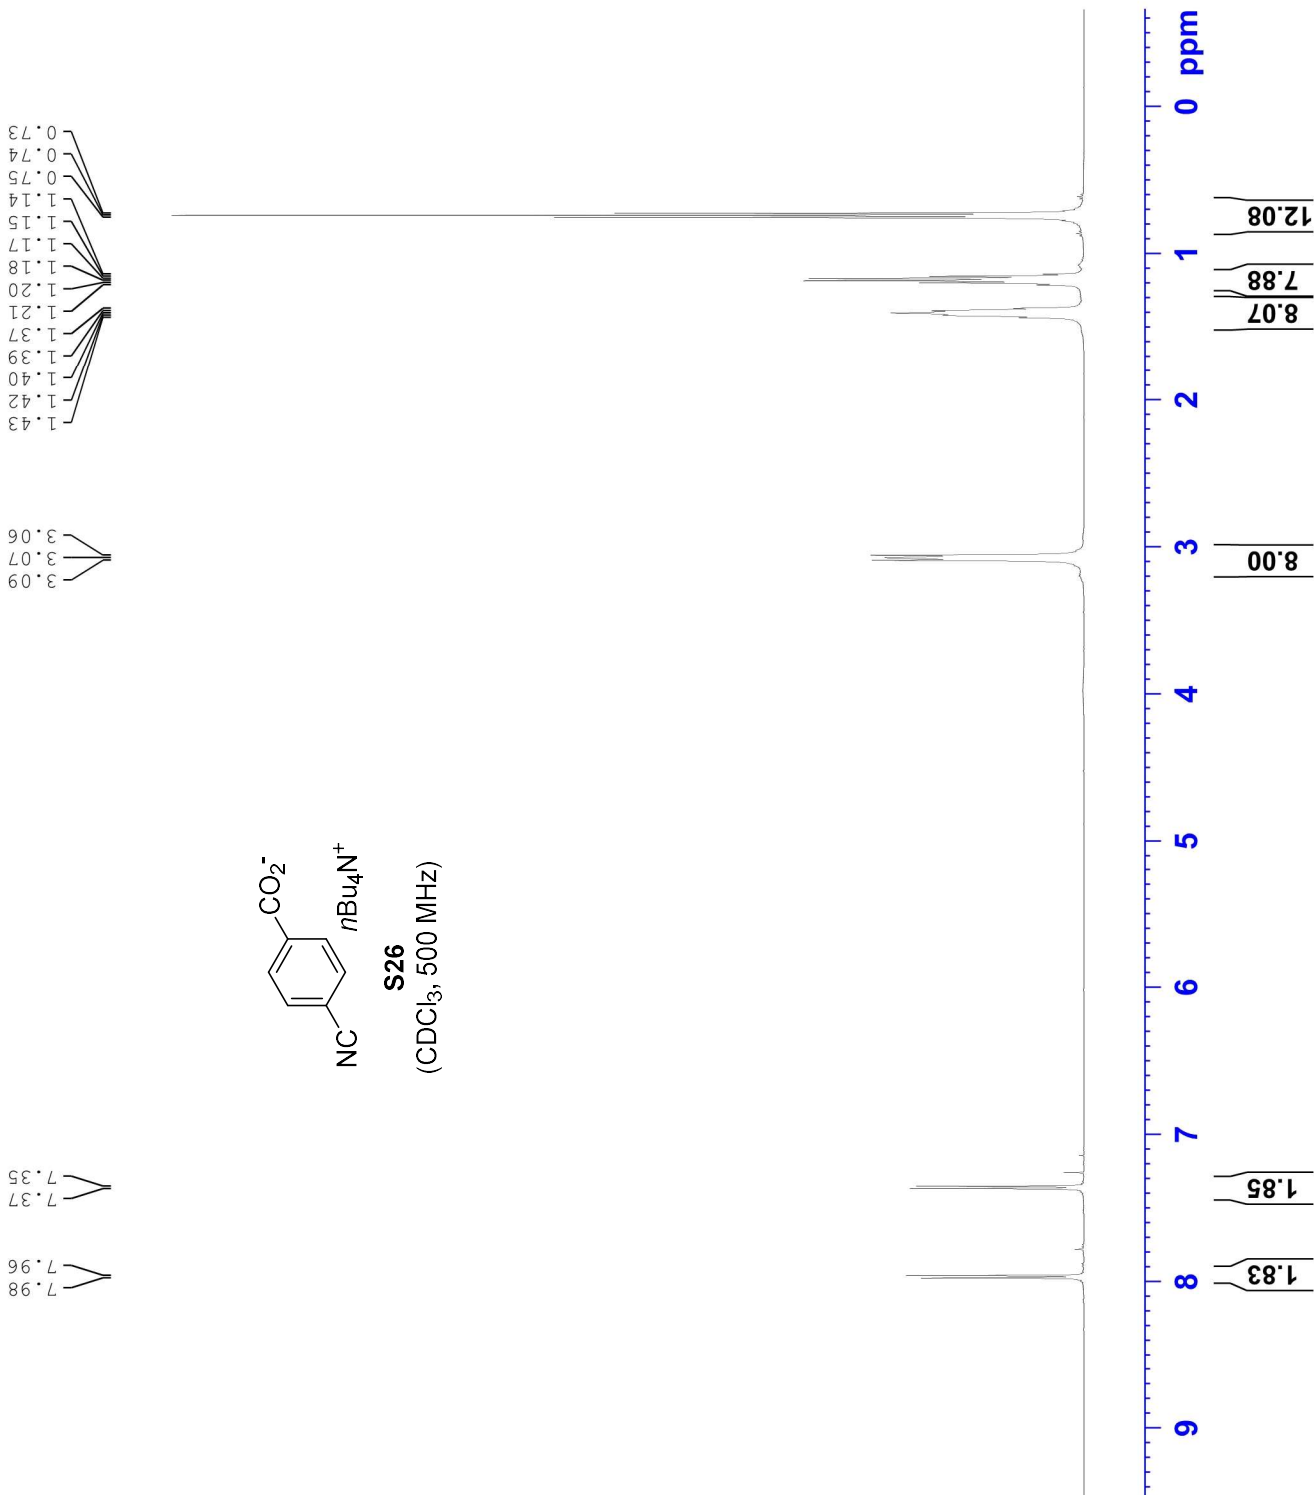

Current Data Parameters  
 NAME Yh-2-53  
 EXPNO 2  
 PROCNO 2

F2 - Acquisition Parameters  
 Date\_ 20180814  
 Time\_ 16.07  
 INSTRUM spect  
 PROBD 5 mm PABBO BB/  
 PULPROG zgdc  
 TD 187496  
 SOLVENT CDC13  
 NS 3  
 DS 0  
 SWH 31250.000 Hz  
 FIDRES 0.166670 Hz  
 AQ 2.9999361 sec  
 RG 2050  
 DW 16.000 usec  
 DE 6.50 usec  
 TE 295.8 K  
 D1 3.00000000 sec  
 D11 0.03000000 sec  
 TD0 1

==== CHANNEL f1 =====  
 SFO1 125.7049802 MHz  
 NUC1 13C  
 P1 10.00 usec  
 PLW1 72.83999634 W

==== CHANNEL f2 =====  
 SFO2 499.8724993 MHz  
 NUC2 1H  
 CPDPRG[2] waltz16  
 PCPD2 80.00 usec  
 PLW2 19.00000000 W  
 PLW12 0.29688001 W

F2 - Processing parameters  
 SI 1048576  
 SF 125.6924115 MHz  
 WDW EM  
 SSB 0  
 LB 0  
 GB 0  
 PC 1.40

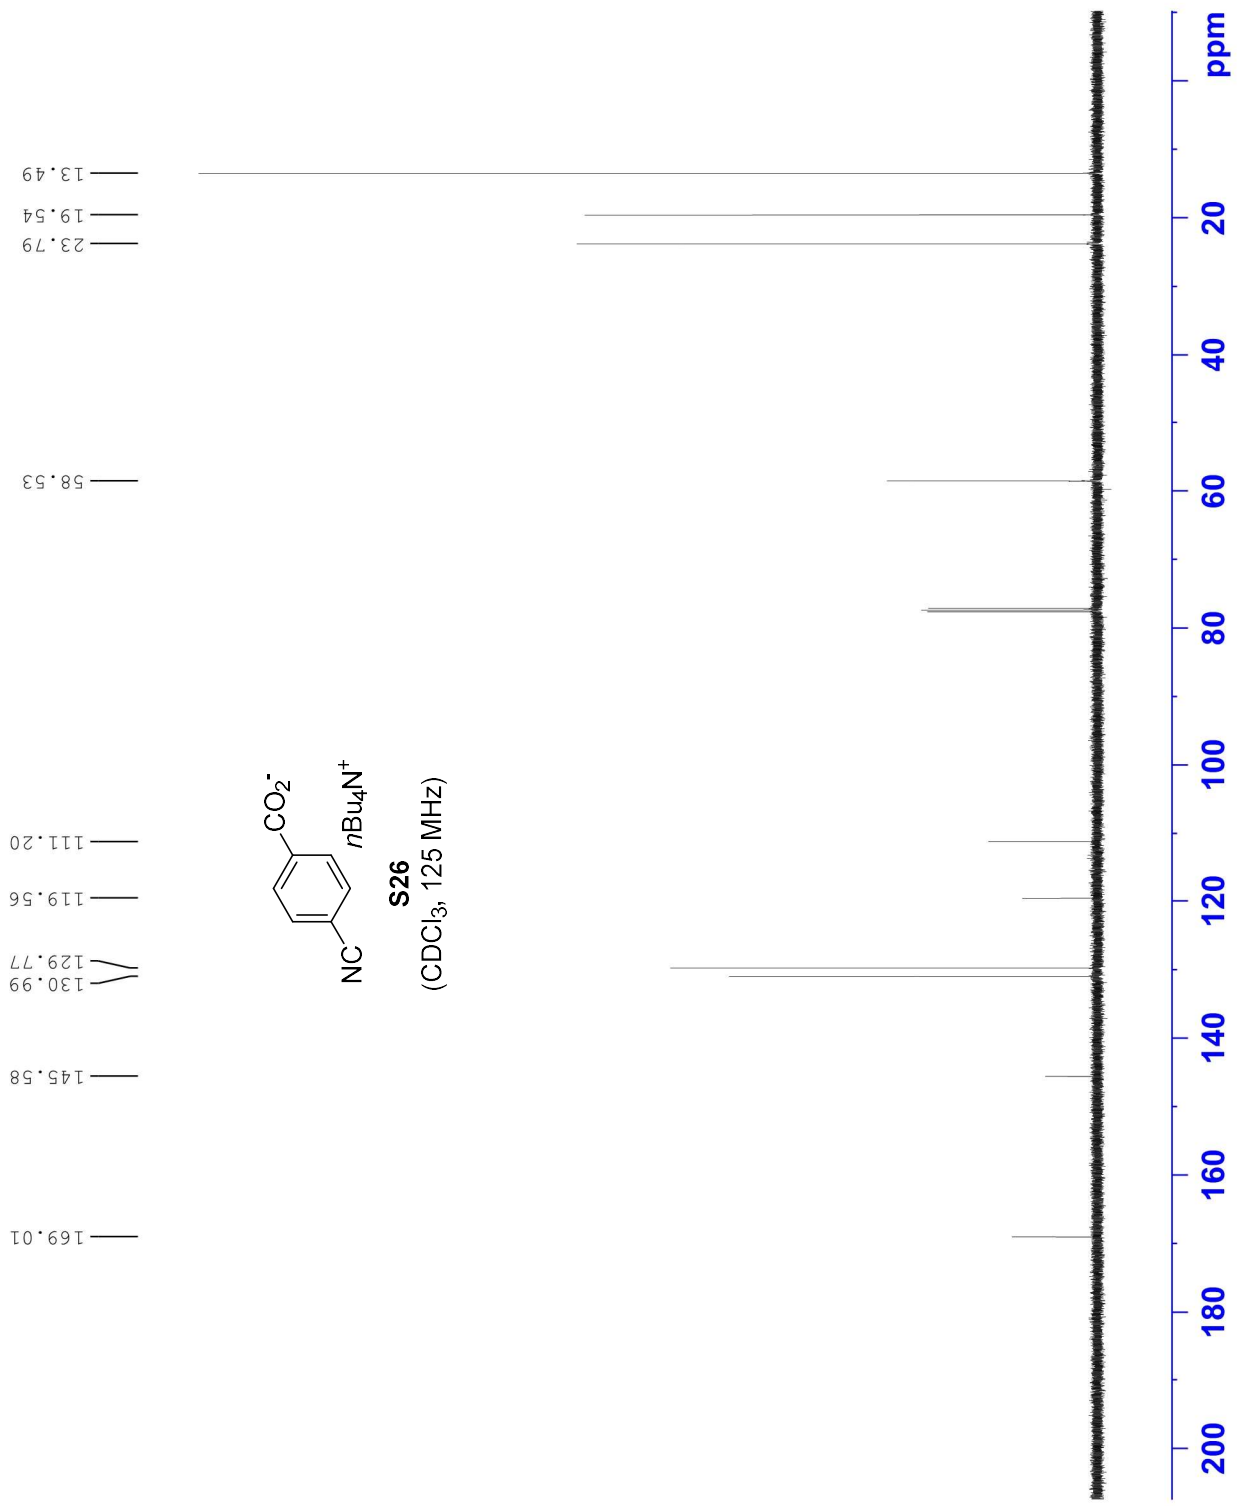

Current Data Parameters  
 NAME Yh-2-40-a  
 EXPNO 1  
 PROCNO 1

F2 - Acquisition Parameters  
 Date\_ 20180829  
 Time\_ 22.24  
 INSTRUM spect  
 PROBHD 5 mm PATXI 1H/  
 PULPROG zg  
 TD 59998  
 SOLVENT CDC13  
 NS 1  
 DS 0  
 SWH 10000.000 Hz  
 FIDRES 0.166672 Hz  
 AQ 2.9999001 sec  
 RG 97.37  
 DW 50.000 usec  
 DE 10.00 usec  
 TE 294.1 K  
 D1 4.0000000 sec  
 TD0 1

==== CHANNEL f1 =====  
 SF01 500.1330885 MHz  
 NUC1 1H  
 P1 3.30 usec  
 PLW1 12.19999981 W

F2 - Processing parameters  
 SI 65536  
 SF 500.1300140 MHz  
 WDW EM  
 SSB 0  
 LB 0.30 Hz  
 GB 0  
 PC 1.00

1.62  
1.60  
1.59  
1.41  
1.40  
1.38  
1.37  
1.36  
1.34  
0.94

3.32  
3.31  
3.30

7.53  
7.51

8.17  
8.16

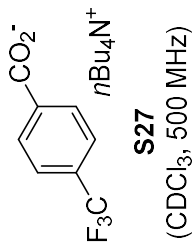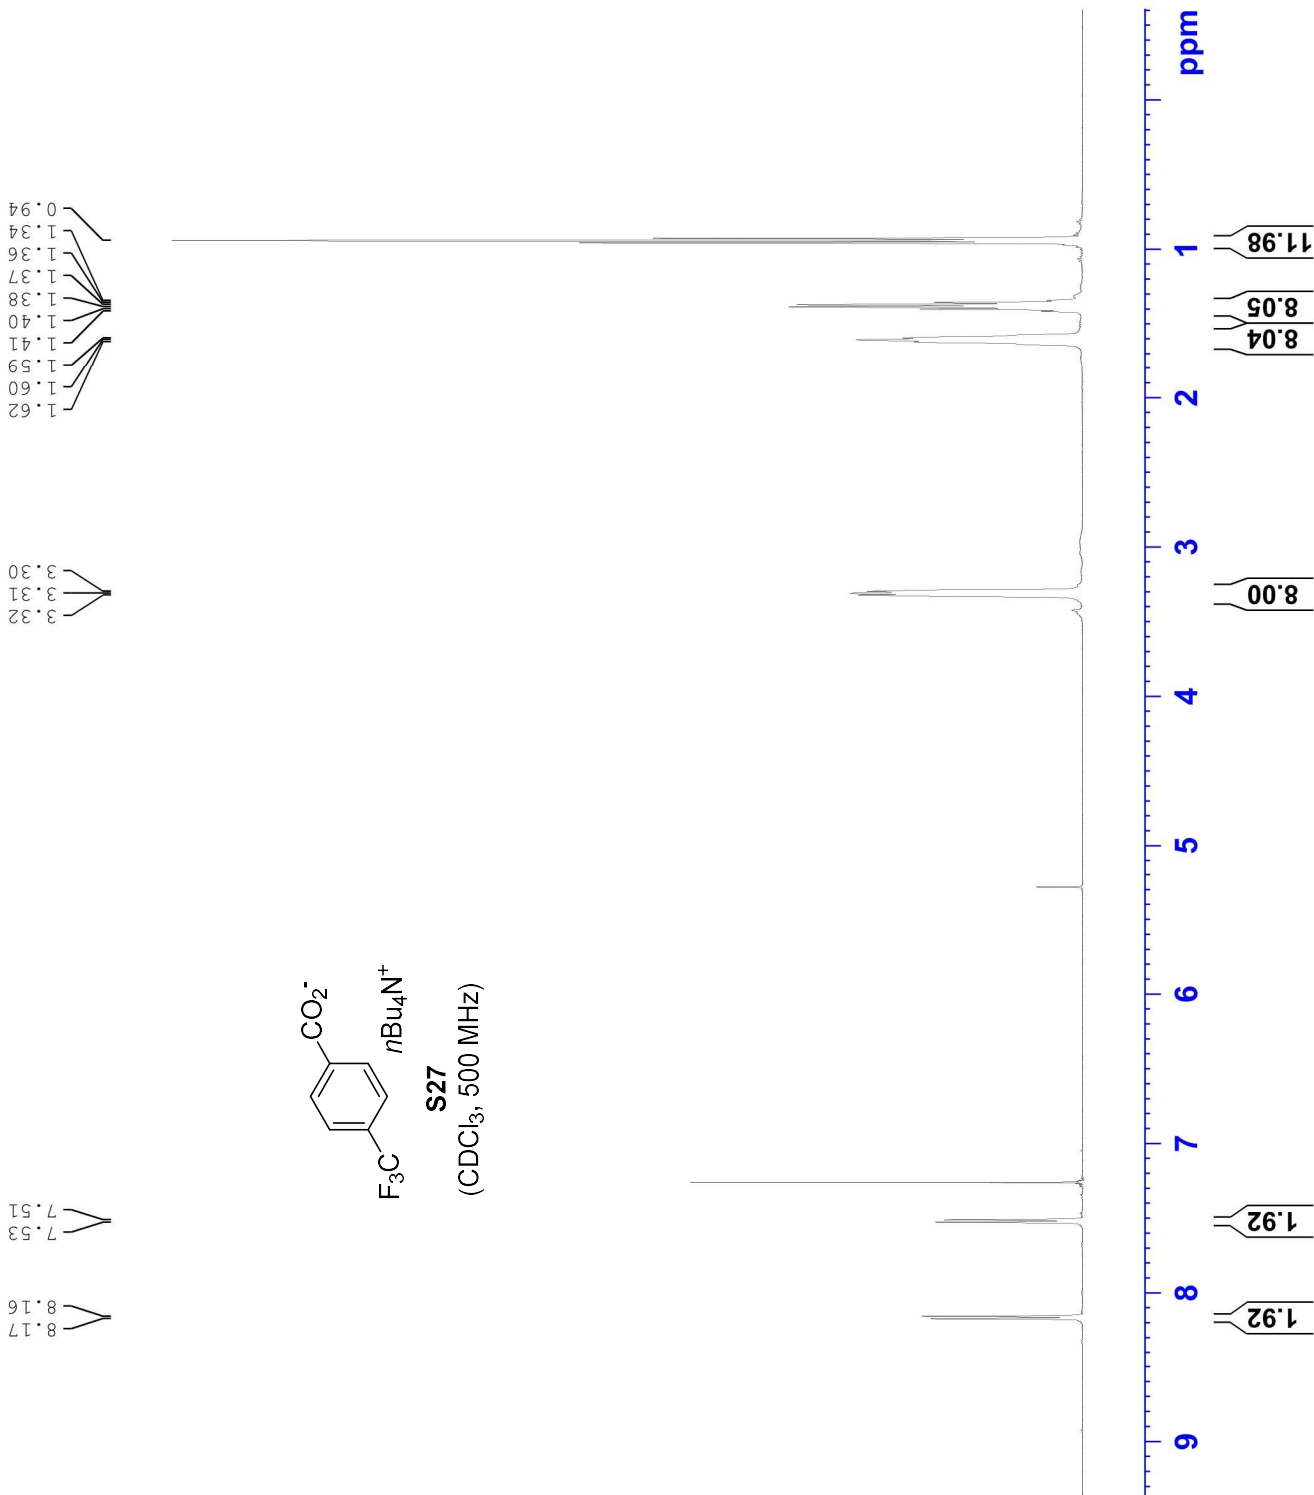

169.58  
144.66  
129.98  
129.73  
129.51  
125.65  
123.95  
123.92

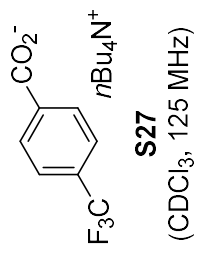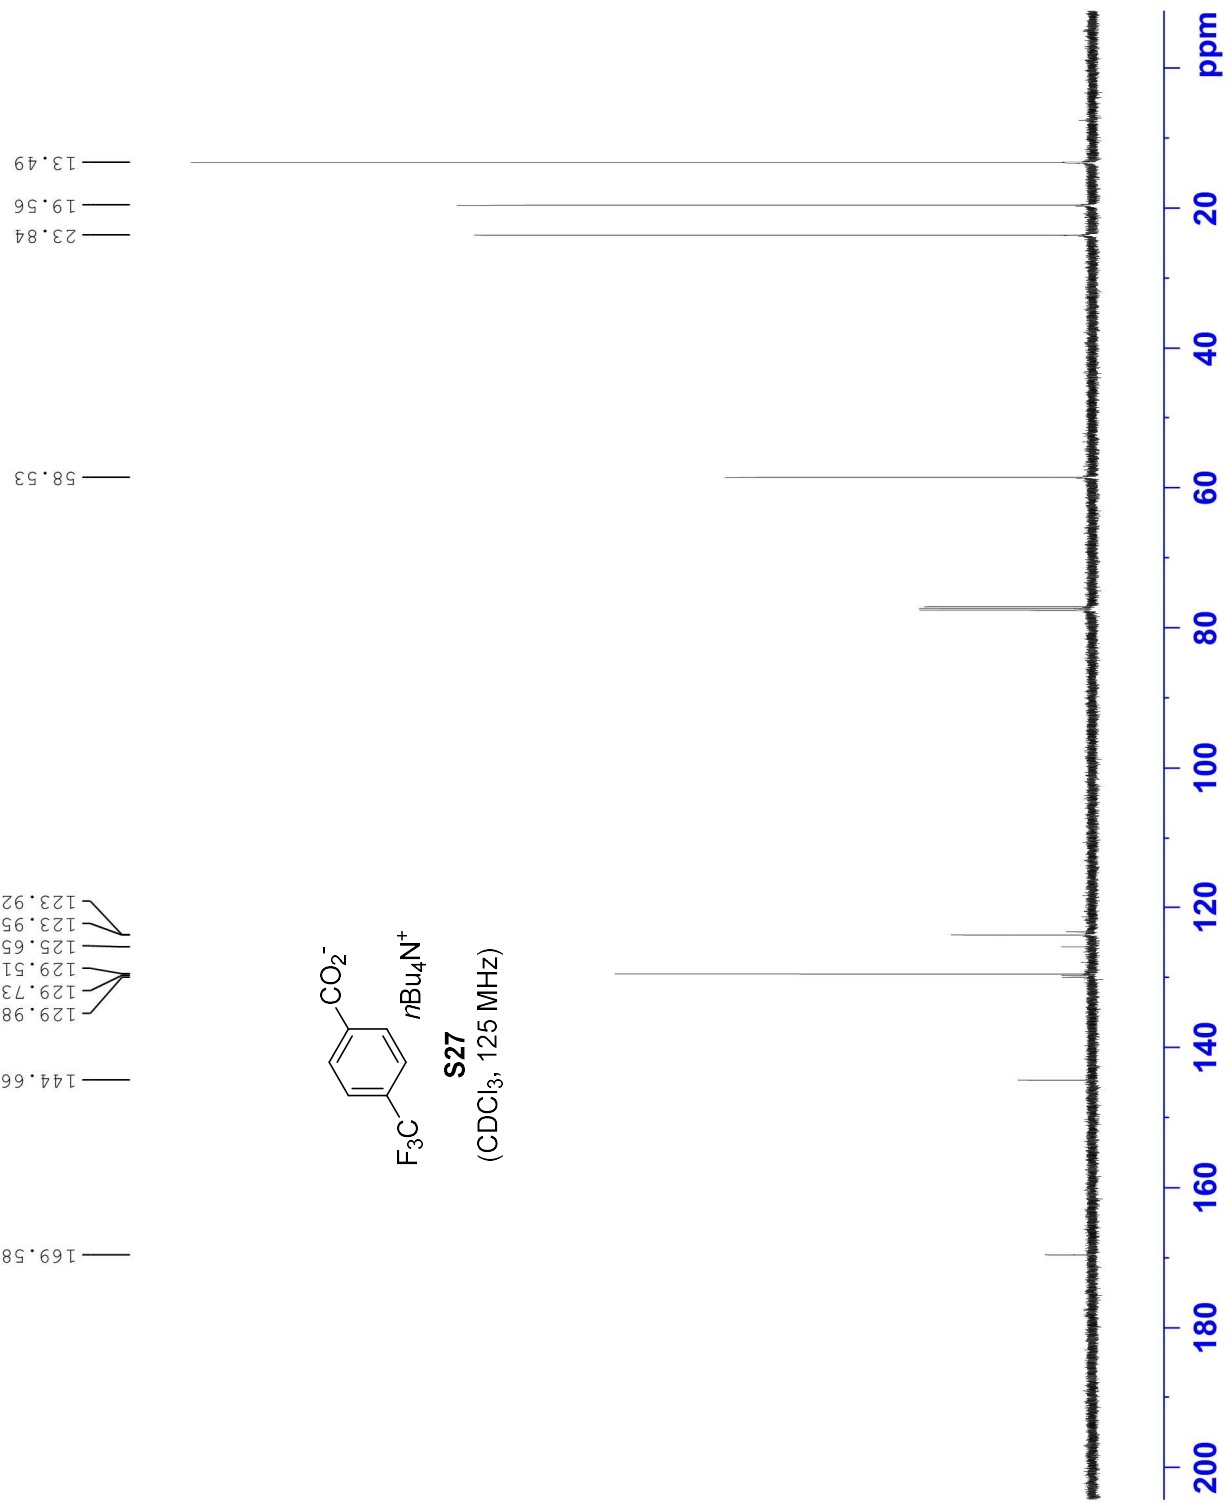

Current Data Parameters  
 NAME yh-2-40-a  
 EXPNO 2  
 PROCNO 2

F2 - Acquisition Parameters  
 Date\_ 20180829  
 Time 22.11  
 INSTRUM spect  
 PROBHD 5 mm FAQNP 1H/  
 PULPROG zgpg  
 TD 197364  
 SOLVENT CDC13  
 NS 42  
 DS 0  
 SWH 32894.738 Hz  
 FIDRES 0.166670 Hz  
 AQ 2.9999328 sec  
 RG 2050  
 DW 15.200 usec  
 DE 6.00 usec  
 TE 295.8 K  
 D1 10.00000000 sec  
 D11 0.03000000 sec  
 TDO 1

==== CHANNEL f1 =====  
 NUC1 13C  
 P1 9.90 usec  
 PL1 1.00 dB  
 PL1W 72.42802429 W  
 SF01 125.7716224 MHz

==== CHANNEL f2 =====  
 CPDPRG[2] waltz16  
 NUC2 1H  
 PCPD2 80.00 usec  
 PL2 0 dB  
 PL12 16.50 dB  
 PL13 17.00 dB  
 PL2W 24.54113007 W  
 PL12W 0.54940748 W  
 PL13W 0.48965994 W  
 SF02 500.1325006 MHz

F2 - Processing parameters  
 SI 131072  
 SF 125.7577890 MHz  
 WDW EM  
 SSB 0  
 LB 0.30 Hz  
 GB 0  
 PC 1.40

Current Data Parameters  
 NAME yh-2-65  
 EXPNO 1  
 PROCNO 1

F2 - Acquisition Parameters

Date\_ 20180814  
 Time\_ 21.31  
 INSTRUM spect  
 PROBHD 5 mm PABBO BB/  
 PULPROG zg  
 TD 59998  
 SOLVENT CDC13  
 NS 2  
 DS 0  
 SWH 10000.000 Hz  
 FIDRES 0.166672 Hz  
 AQ 2.9999001 sec  
 RG 44.57  
 DW 50.000 usec  
 DE 6.50 usec  
 TE 296.0 K  
 D1 4.0000000 sec  
 TD0 1

==== CHANNEL f1 =====  
 SF01 499.8730869 MHz  
 NUC1 1H  
 P1 3.58 usec  
 PLW1 18.2500000 W

F2 - Processing parameters  
 SI 65536  
 SF 499.8700123 MHz  
 WDW EM  
 SSB 0  
 LB 0.30 Hz  
 GB 0  
 PC 1.00

0.89  
 0.91  
 0.92  
 1.30  
 1.32  
 1.33  
 1.35  
 1.36  
 1.38  
 1.54  
 1.55  
 1.57  
 2.12

3.22  
 3.24  
 3.26  
 3.85

7.91  
 7.92  
 8.07  
 8.09

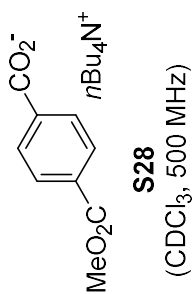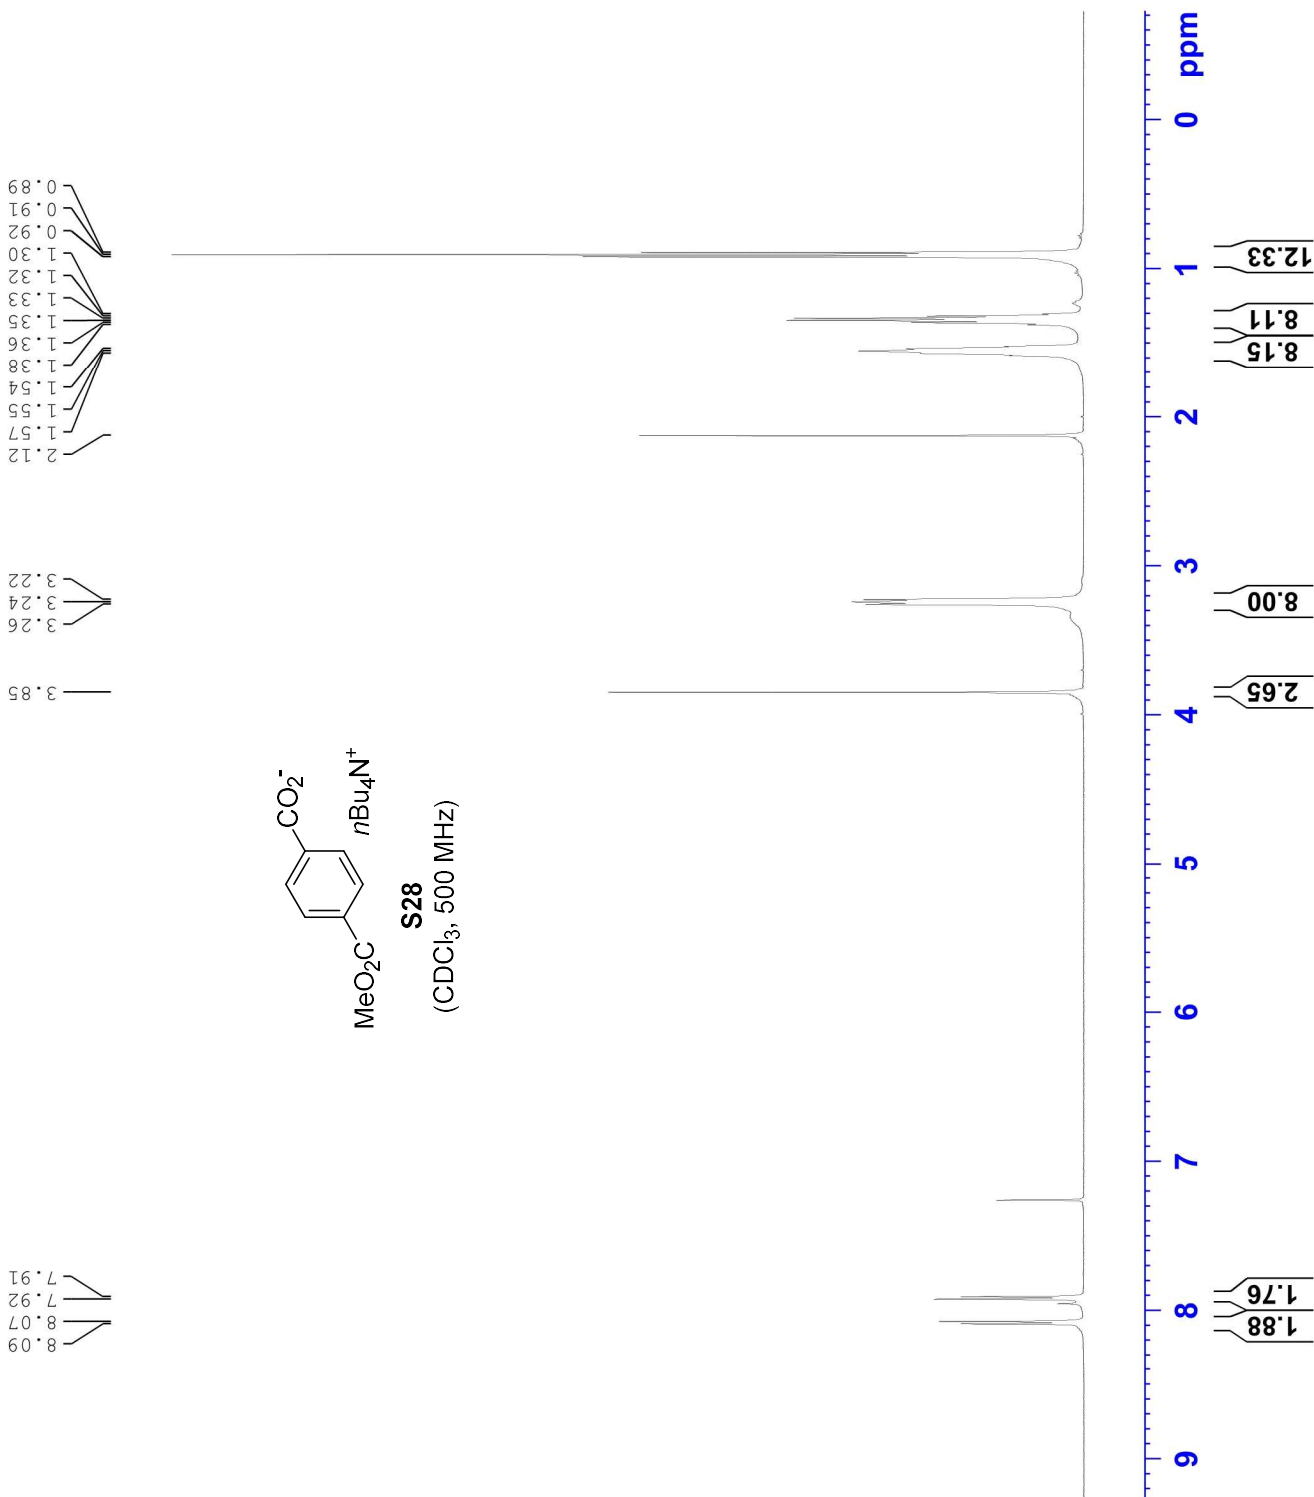

170.38  
167.53  
145.64  
129.72  
129.26  
128.63

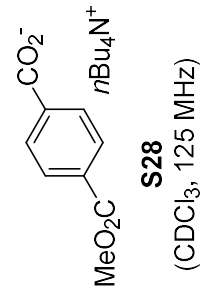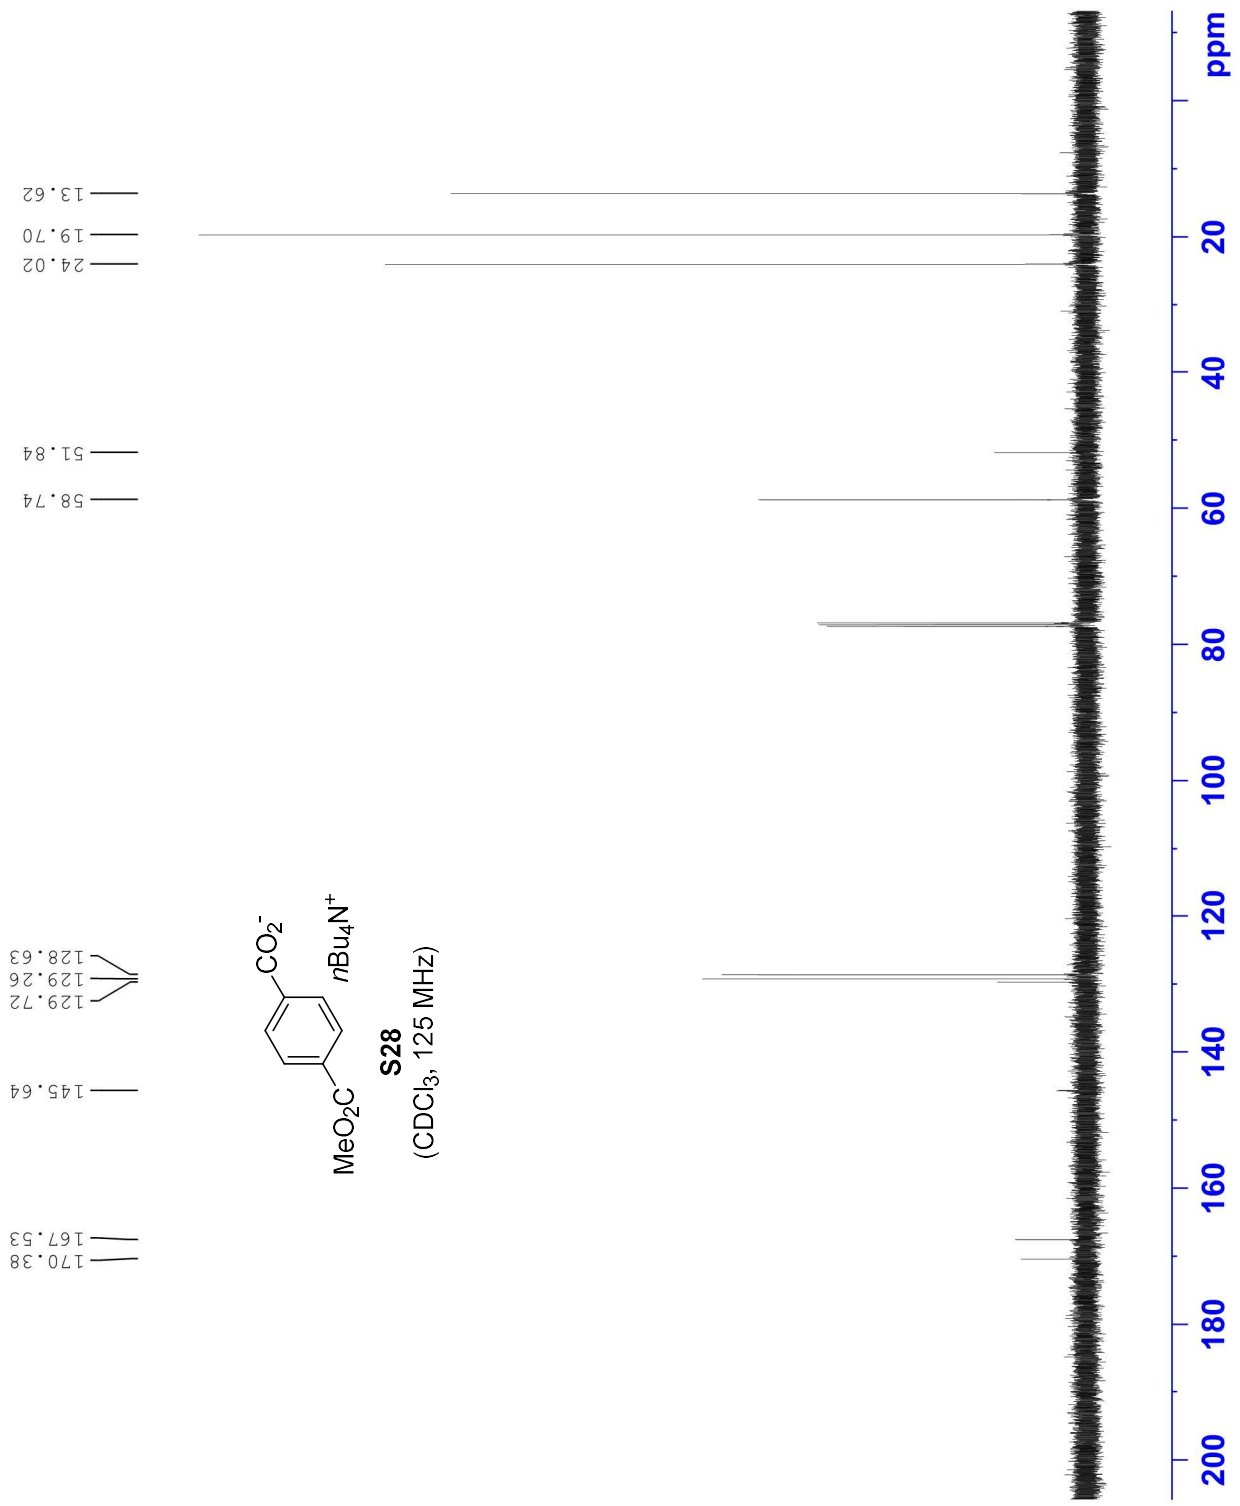

Current Data Parameters  
 NAME Yh-2-65  
 EXPNO 2  
 PROCNO 2

F2 - Acquisition Parameters  
 Date\_ 20180814  
 Time\_ 21.45  
 INSTRUM spect  
 PROBHD 5 mm PABBO BB/  
 PULPROG zgdc  
 TD 187496  
 SOLVENT CDC13  
 NS 47  
 DS 0  
 SWH 31250.000 Hz  
 FIDRES 0.166670 Hz  
 AQ 2.9999361 sec  
 RG 2050  
 DW 16.000 usec  
 DE 6.50 usec  
 TE 296.8 K  
 D1 3.00000000 sec  
 D11 0.03000000 sec  
 TD0 1

==== CHANNEL f1 =====  
 SFO1 125.7049802 MHz  
 NUC1 13C  
 P1 10.00 usec  
 PLW1 72.83999634 W

==== CHANNEL f2 =====  
 SFO2 499.8724993 MHz  
 NUC2 1H  
 CPDPRG[2] waltz16  
 PCPD2 80.00 usec  
 PLW2 19.00000000 W  
 PLW12 0.29688001 W

F2 - Processing parameters  
 SI 1048576  
 SF 125.6924115 MHz  
 WDW EM  
 SSB 0  
 LB 0.30 Hz  
 GB 0  
 PC 1.40



Current Data Parameters  
 NAME yh-2-70  
 EXPNO 1  
 PROCNO 1

F2 - Acquisition Parameters  
 Date\_ 20180814  
 Time\_ 21.49  
 INSTRUM spect  
 PROBHD 5 mm PABBO BB/  
 PULPROG zg  
 TD 59998  
 SOLVENT CDC13  
 NS 3  
 DS 0  
 SWH 10000.000 Hz  
 FIDRES 0.166672 Hz  
 AQ 2.9999001 sec  
 RG 15.35  
 DW 50.000 usec  
 DE 6.50 usec  
 TE 296.4 K  
 D1 4.0000000 sec  
 TD0 1

==== CHANNEL f1 =====  
 SFO1 499.8730869 MHz  
 NUC1 1H  
 P1 3.58 usec  
 PLW1 18.2500000 W

F2 - Processing parameters  
 SI 65536  
 SF 499.8700134 MHz  
 WDW EM  
 SSB 0  
 LB 0.30 Hz  
 GB 0  
 PC 1.00

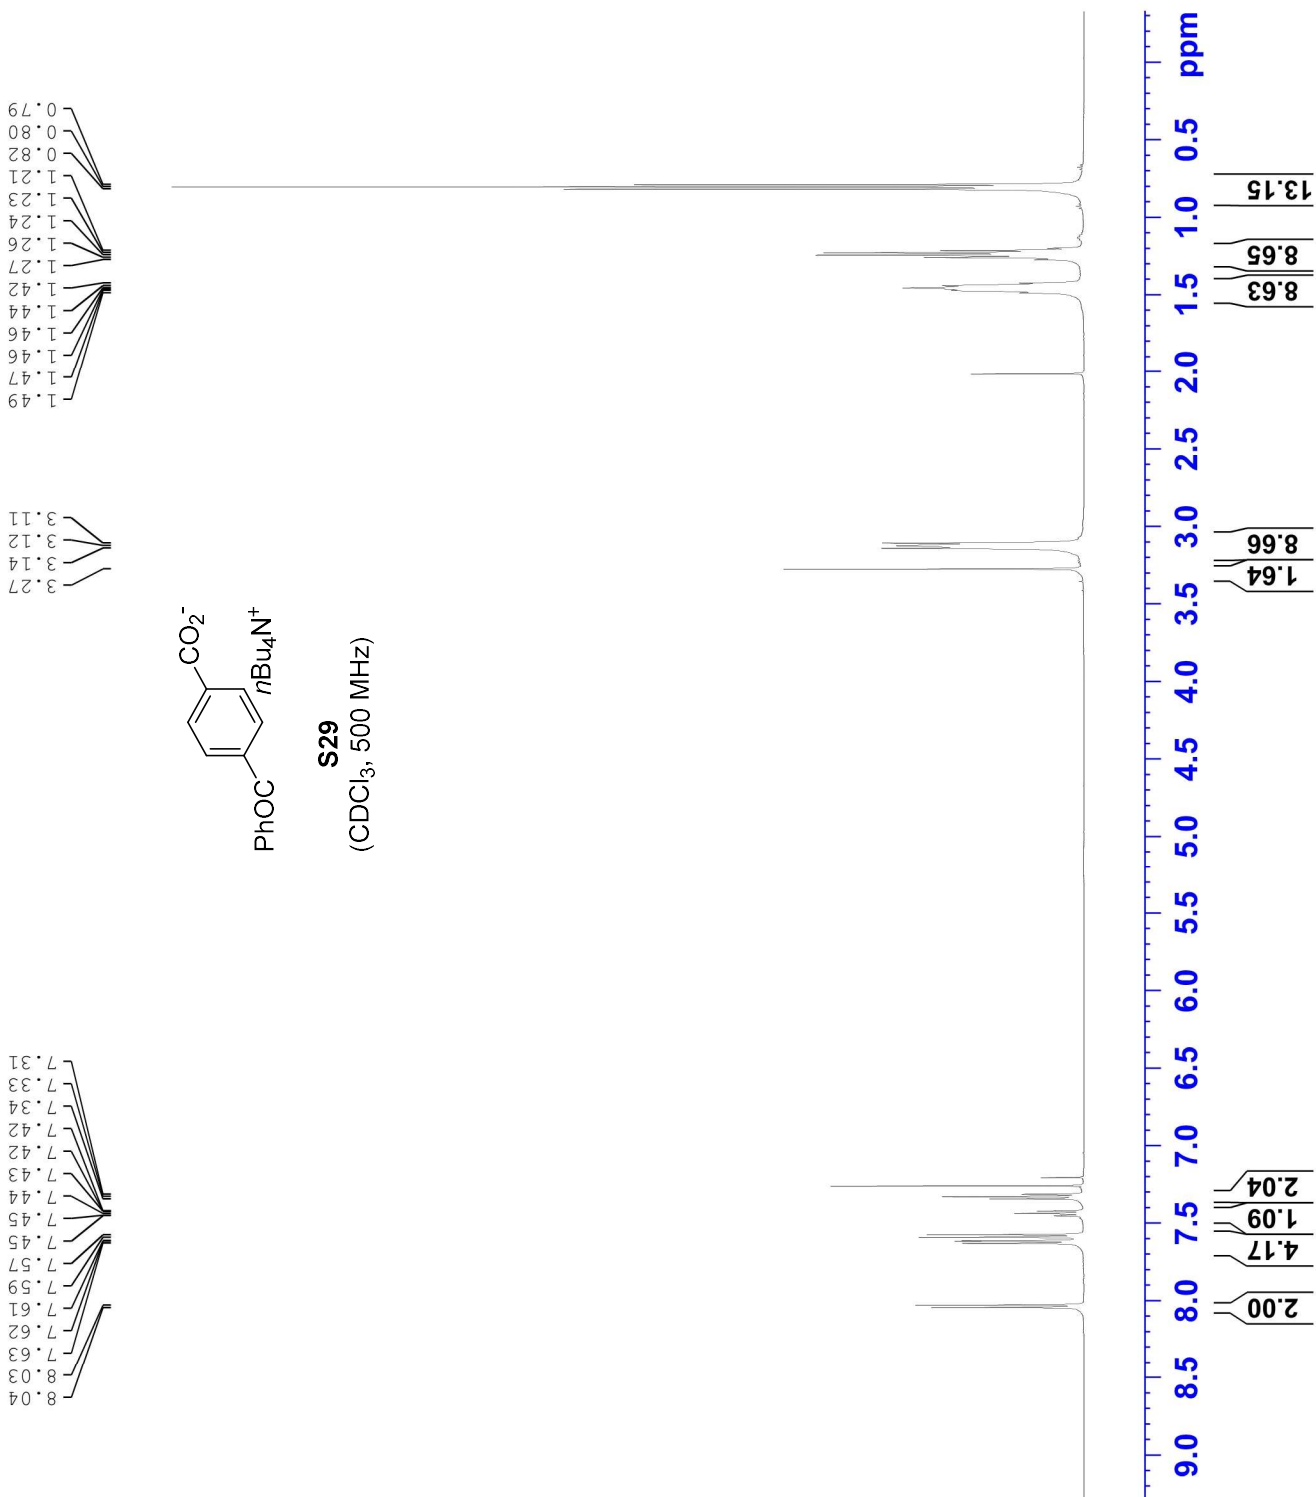

197.10  
170.21  
144.96  
137.86  
137.16  
132.22  
129.81  
129.18  
129.10  
128.14

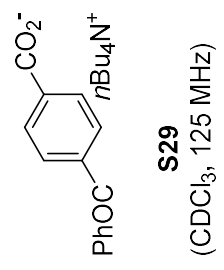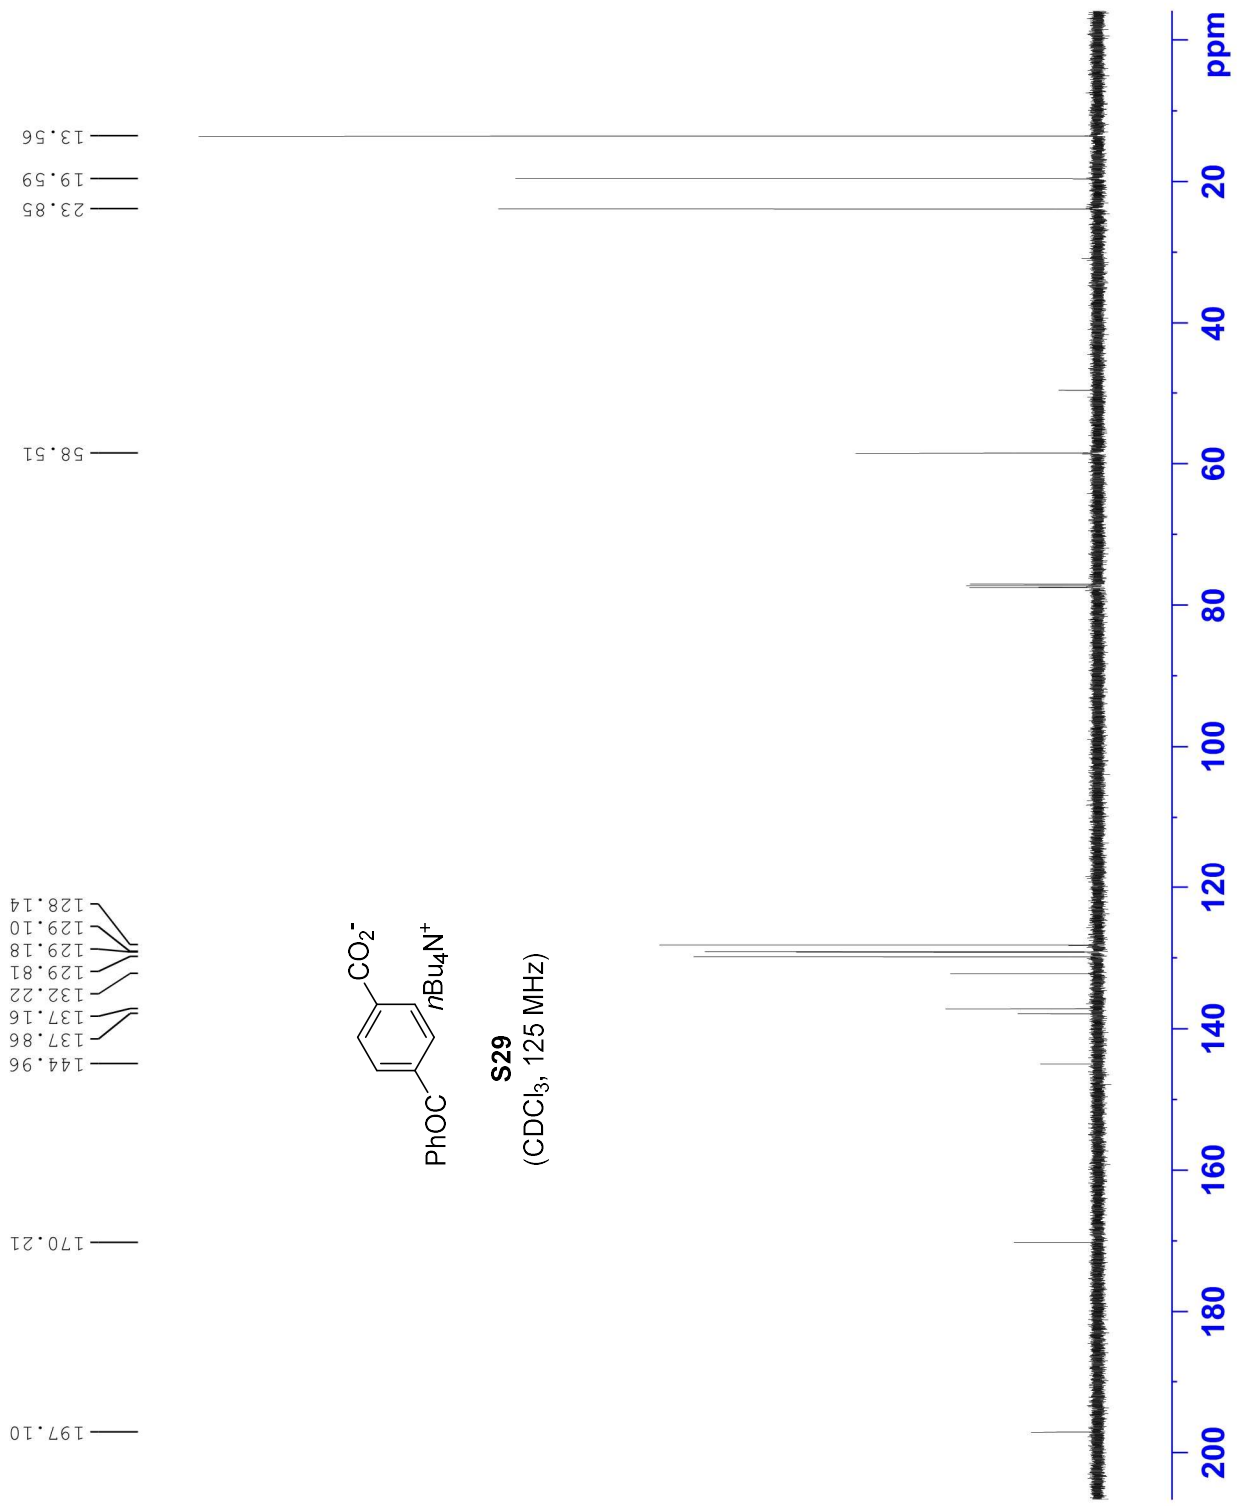

Current Data Parameters  
 NAME Yh-2-70  
 EXPNO 2  
 PROCNO 2

F2 - Acquisition Parameters  
 Date\_ 20180814  
 Time\_ 21.59  
 INSTRUM spect  
 PROBD 5 mm PABBO BB/  
 PULPROG zgdc  
 TD 187496  
 SOLVENT CDC13  
 NS 6  
 DS 0  
 SWH 31250.000 Hz  
 FIDRES 0.166670 Hz  
 AQ 2.9999361 sec  
 RG 2050  
 DW 16.000 usec  
 DE 6.50 usec  
 TE 296.4 K  
 D1 3.00000000 sec  
 D11 0.03000000 sec  
 TD0 1

==== CHANNEL f1 =====  
 SFO1 125.7049802 MHz  
 NUC1 13C  
 P1 10.00 usec  
 PLW1 72.83999634 W

==== CHANNEL f2 =====  
 SFO2 499.8724993 MHz  
 NUC2 1H  
 CPDPRG[2] waltz16  
 PCPD2 80.00 usec  
 PLW2 19.00000000 W  
 PLW12 0.29688001 W

F2 - Processing parameters  
 SI 1048576  
 SF 125.6924115 MHz  
 WDW EM  
 SSB 0  
 LB 0.30 Hz  
 GB 0  
 PC 1.40

Current Data Parameters  
 NAME yh-2-44  
 EXPNO 1  
 PROCNO 1

F2 - Acquisition Parameters  
 Date\_ 20180814  
 Time\_ 15.54  
 INSTRUM spect  
 PROBHD 5 mm PABBO BB/  
 PULPROG zg  
 TD 59998  
 SOLVENT CDC13  
 NS 6  
 DS 0  
 SWH 10000.000 Hz  
 FIDRES 0.166672 Hz  
 AQ 2.9999001 sec  
 RG 25.24  
 DW 50.000 usec  
 DE 6.50 usec  
 TE 295.7 K  
 D1 4.0000000 sec  
 TD0 1

==== CHANNEL f1 =====  
 SFO1 499.8730869 MHz  
 NUC1 1H  
 P1 3.58 usec  
 PLW1 18.25000000 W

F2 - Processing parameters  
 SI 65536  
 SF 499.8700130 MHz  
 EM  
 WDW 0  
 SSB 0  
 LB 0.30 Hz  
 GB 0  
 PC 1.00

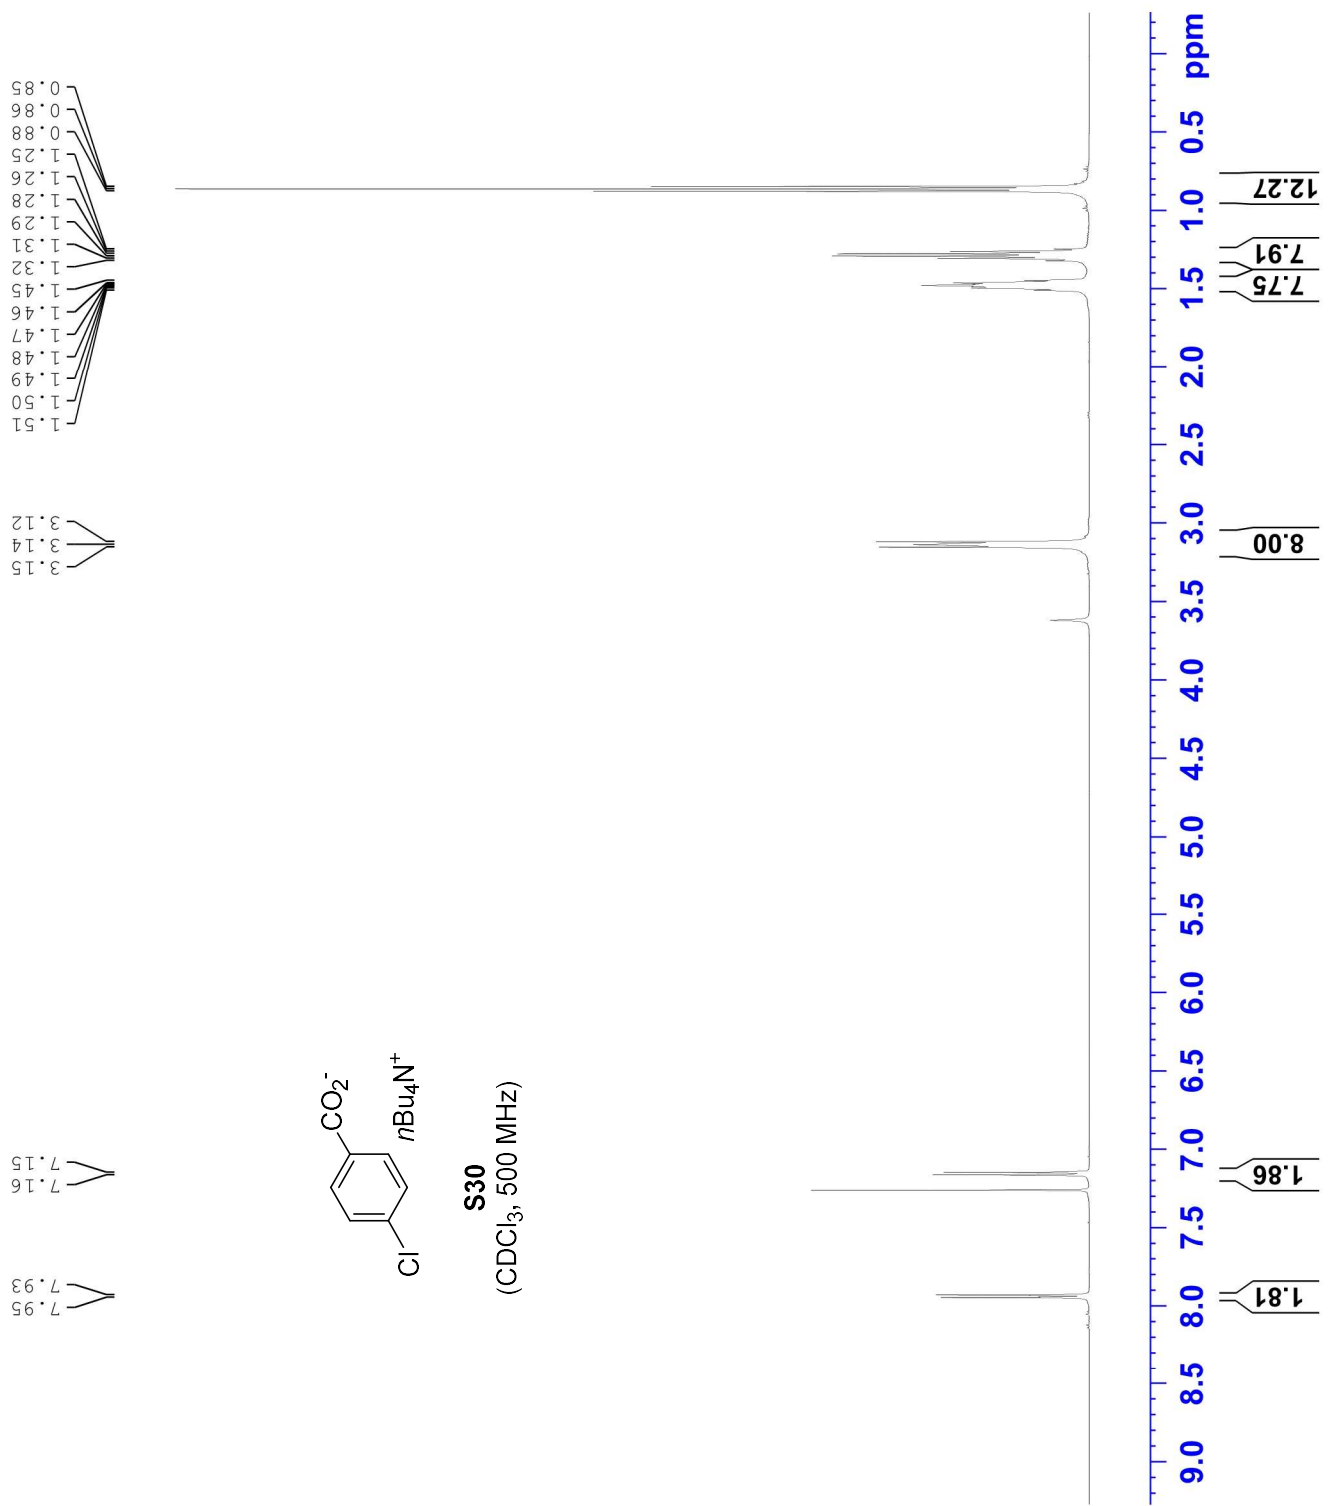

Current Data Parameters  
 NAME Yh-2-44  
 EXPNO 2  
 PROCNO 2

F2 - Acquisition Parameters  
 Date\_ 20180814  
 Time\_ 15.58  
 INSTRUM spect  
 PROBHD 5 mm PABBO BB/  
 PULPROG zgdc  
 TD 187496  
 SOLVENT CDCl3  
 NS 4  
 DS 0  
 SWH 31250.000 Hz  
 FIDRES 0.166670 Hz  
 AQ 2.9999361 sec  
 RG 2050  
 DW 16.000 usec  
 DE 6.50 usec  
 TE 295.8 K  
 D1 3.00000000 sec  
 D11 0.03000000 sec  
 TD0 1

==== CHANNEL f1 =====  
 SFO1 125.7049802 MHz  
 NUC1 13C  
 P1 10.00 usec  
 PLW1 72.83999634 W

==== CHANNEL f2 =====  
 SFO2 499.8724993 MHz  
 NUC2 1H  
 CPDPRG[2] waltz16  
 PCPD2 80.00 usec  
 PLW2 19.00000000 W  
 PLW12 0.29688001 W

F2 - Processing parameters  
 SI 1048576  
 SF 125.6924115 MHz  
 WDW EM  
 SSB 0  
 LB 0.30 Hz  
 GB 0  
 PC 1.40

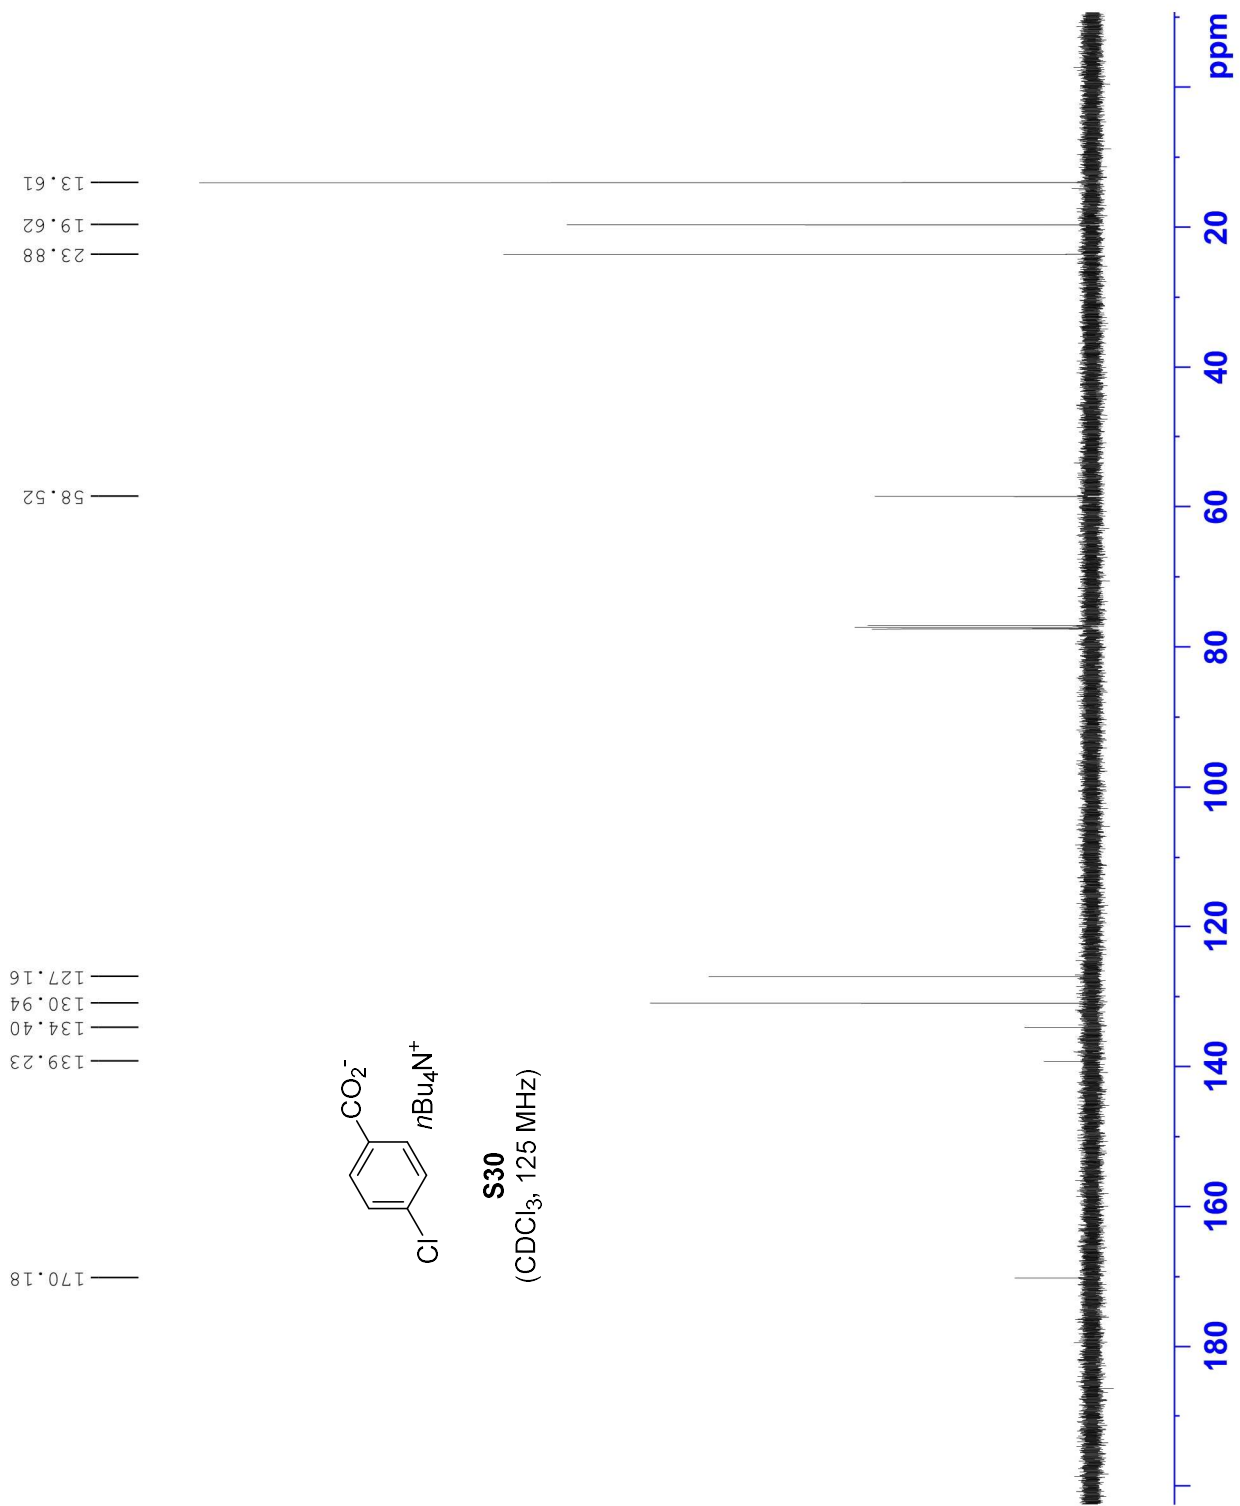

Current Data Parameters  
 NAME Yh-2-51-a  
 EXPNO 1  
 PROCNO 1

F2 - Acquisition Parameters

Date\_ 20180829  
 Time\_ 19.37  
 INSTRUM spect  
 PROBHD 5 mm PATXI 1H/  
 PULPROG zg  
 TD 59998  
 SOLVENT CDCl3  
 NS 2  
 DS 0  
 SWH 10000.000 Hz  
 FIDRES 0.166672 Hz  
 AQ 2.9999001 sec  
 RG 71.78  
 DW 50.000 usec  
 DE 10.000 usec  
 TE 294.2 K  
 D1 4.00000000 sec  
 TD0 1

==== CHANNEL f1 =====  
 SFO1 500.1330885 MHz  
 NUC1 1H  
 P1 3.30 usec  
 PLW1 12.19999981 W

F2 - Processing parameters  
 SI 65536  
 SF 500.1300143 MHz  
 EM  
 WDW 0  
 SSB 0  
 LB 0.30 Hz  
 GB 0  
 PC 1.00

1.60  
1.58  
1.57  
1.56  
1.55  
1.54  
1.39  
1.37  
1.36  
1.35  
1.34  
1.33  
1.32  
1.31  
1.30  
1.29  
1.28  
1.27  
1.26  
1.25  
1.24  
1.23  
1.22  
1.21  
1.20

3.29  
3.25

6.91  
6.89  
6.87

8.07  
8.05  
8.05  
8.05  
8.04

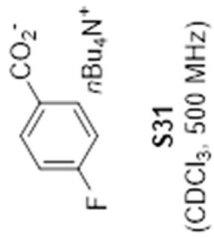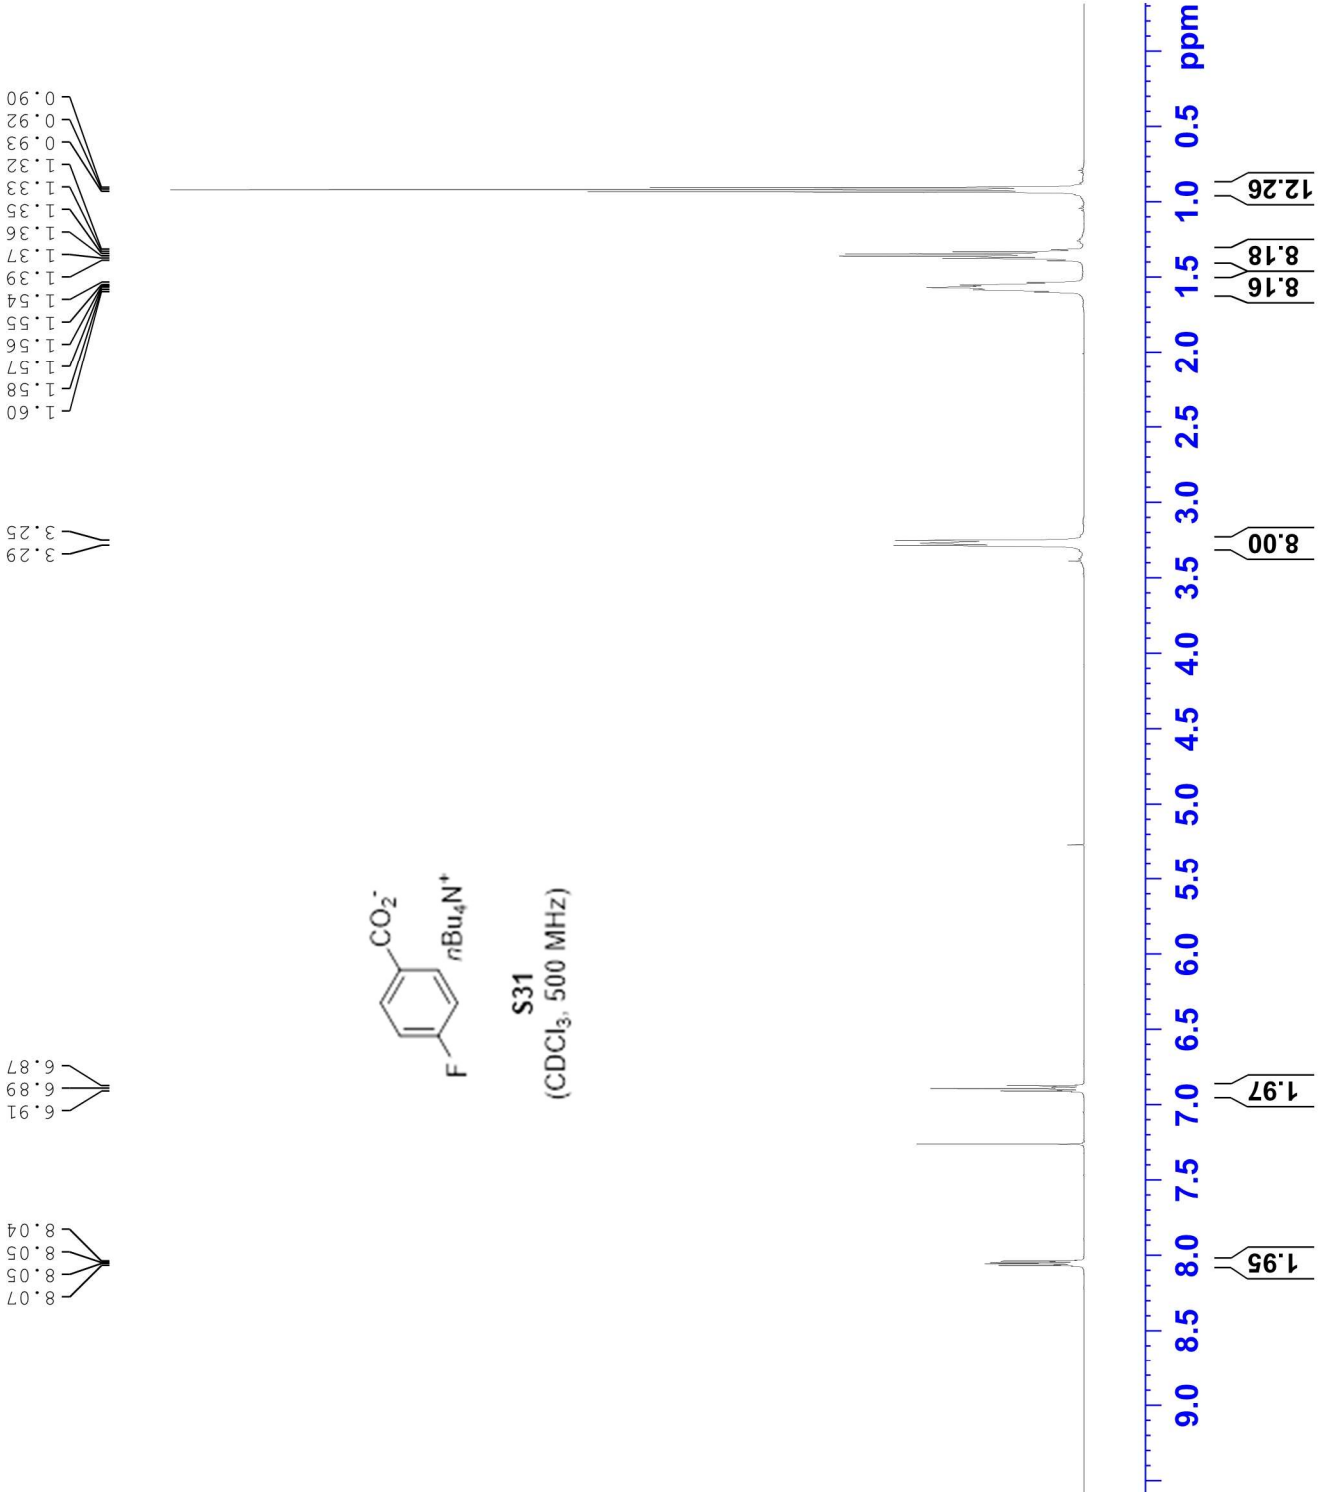

Current Data Parameters  
 NAME Yh-2-51-a  
 EXPNO 2  
 PROCNO 2

F2 - Acquisition Parameters

Date\_ 20180829  
 Time\_ 19.56  
 INSTRUM spect  
 PROBHD 5 mm PABBO BB/  
 PULPROG zgdc  
 TD 187496  
 SOLVENT CDCl3  
 NS 52  
 DS 0  
 SWH 31250.000 Hz  
 FIDRES 0.166670 Hz  
 AQ 2.9999361 sec  
 RG 2050  
 DW 16.000 usec  
 DE 6.50 usec  
 TE 296.7 K  
 D1 3.00000000 sec  
 D11 0.03000000 sec  
 TD0 1

==== CHANNEL f1 =====  
 SFO1 125.7049802 MHz  
 NUC1 13C  
 P1 10.00 usec  
 PLW1 72.83999634 W

==== CHANNEL f2 =====  
 SFO2 499.8724993 MHz  
 NUC2 1H  
 CPDPRG[2] waltz16  
 PCPD2 80.00 usec  
 PLW2 19.00000000 W  
 PLW12 0.29688001 W

F2 - Processing parameters  
 SI 1048576  
 SF 125.6924115 MHz  
 WDW EM  
 SSB 0  
 LB 0.30 Hz  
 GB 0  
 PC 1.40

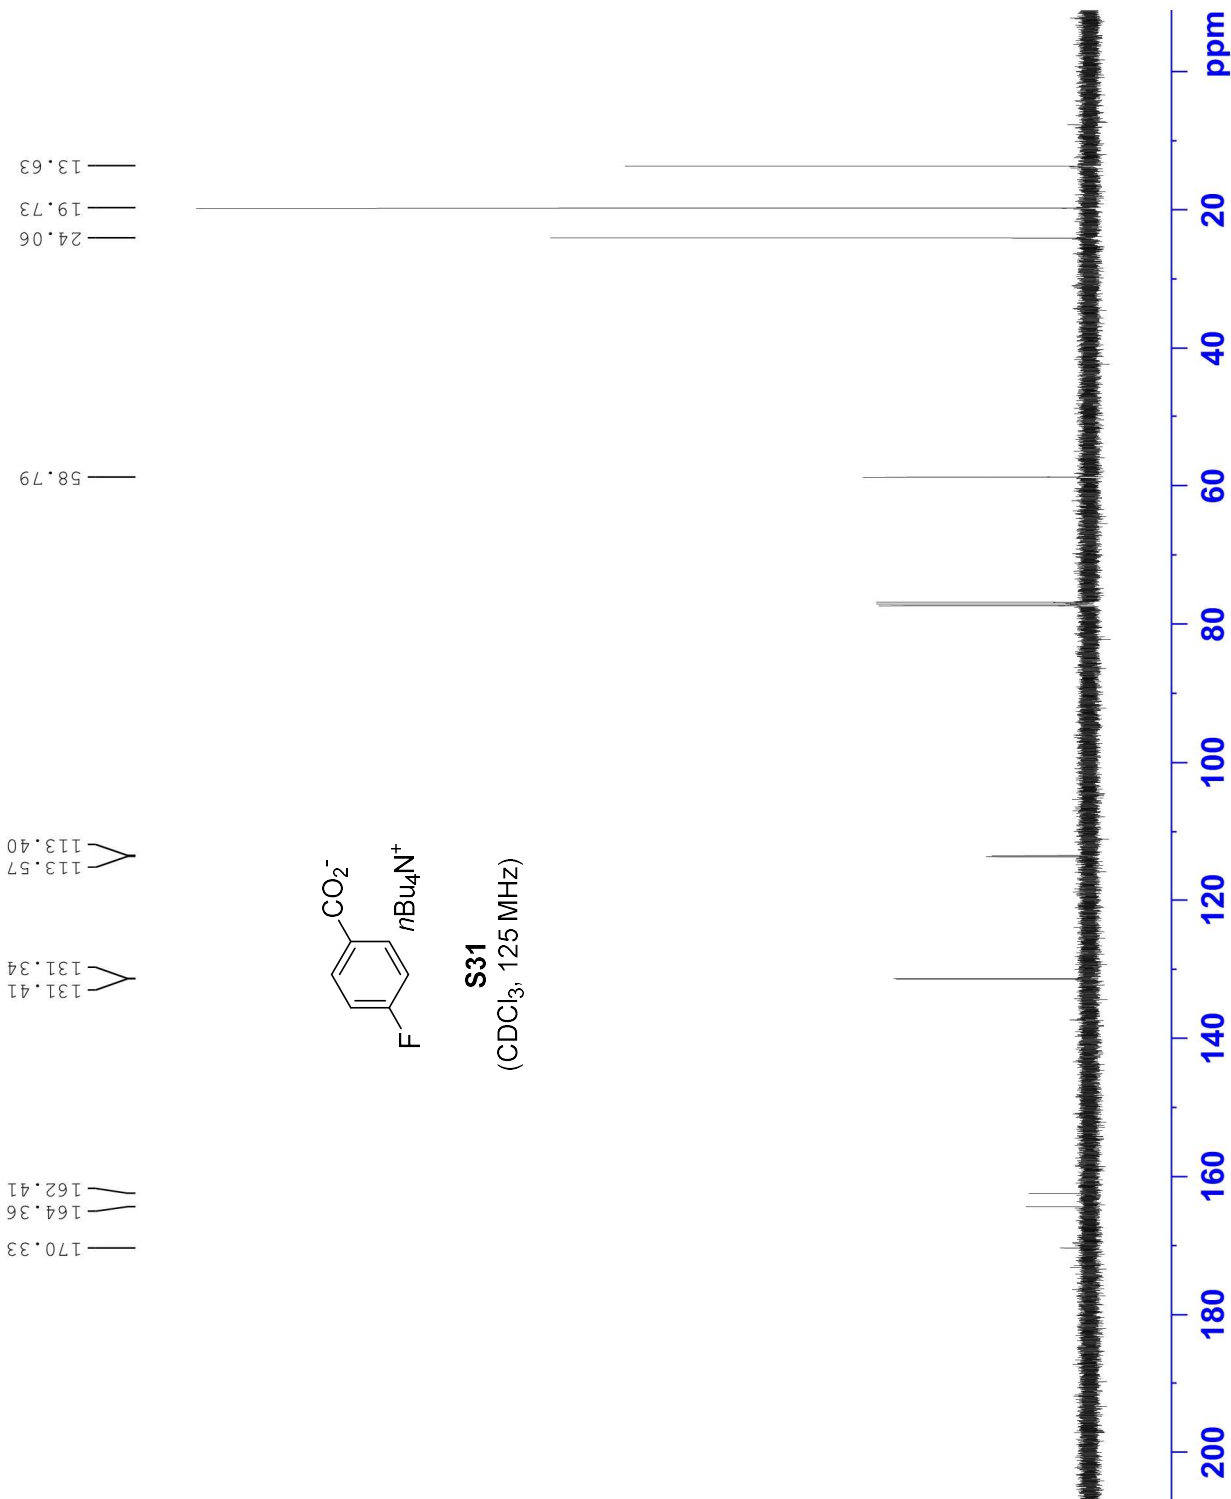

Current Data Parameters  
 NAME Yh-2-66-a  
 EXPNO 1  
 PROCNO 1

F2 - Acquisition Parameters  
 Date\_ 20180829  
 Time\_ 22.43  
 INSTRUM spect  
 PROBHD 5 mm PATXI 1H/  
 PULPROG zg  
 TD 59998  
 SOLVENT CDC13  
 NS 2  
 DS 0  
 SWH 10000.000 Hz  
 FIDRES 0.166672 Hz  
 AQ 2.9999001 sec  
 RG 79.04  
 DW 50.000 usec  
 DE 10.00 usec  
 TE 294.2 K  
 D1 4.00000000 sec  
 TD0 1

==== CHANNEL f1 =====  
 SFO1 500.1330885 MHz  
 NUC1 1H  
 P1 3.30 usec  
 PLW1 12.19999981 W

F2 - Processing parameters  
 SI 65536  
 SF 500.1300000 MHz  
 EM  
 WDW 0  
 SSB 0  
 LB 0.30 Hz  
 GB 0  
 PC 1.00

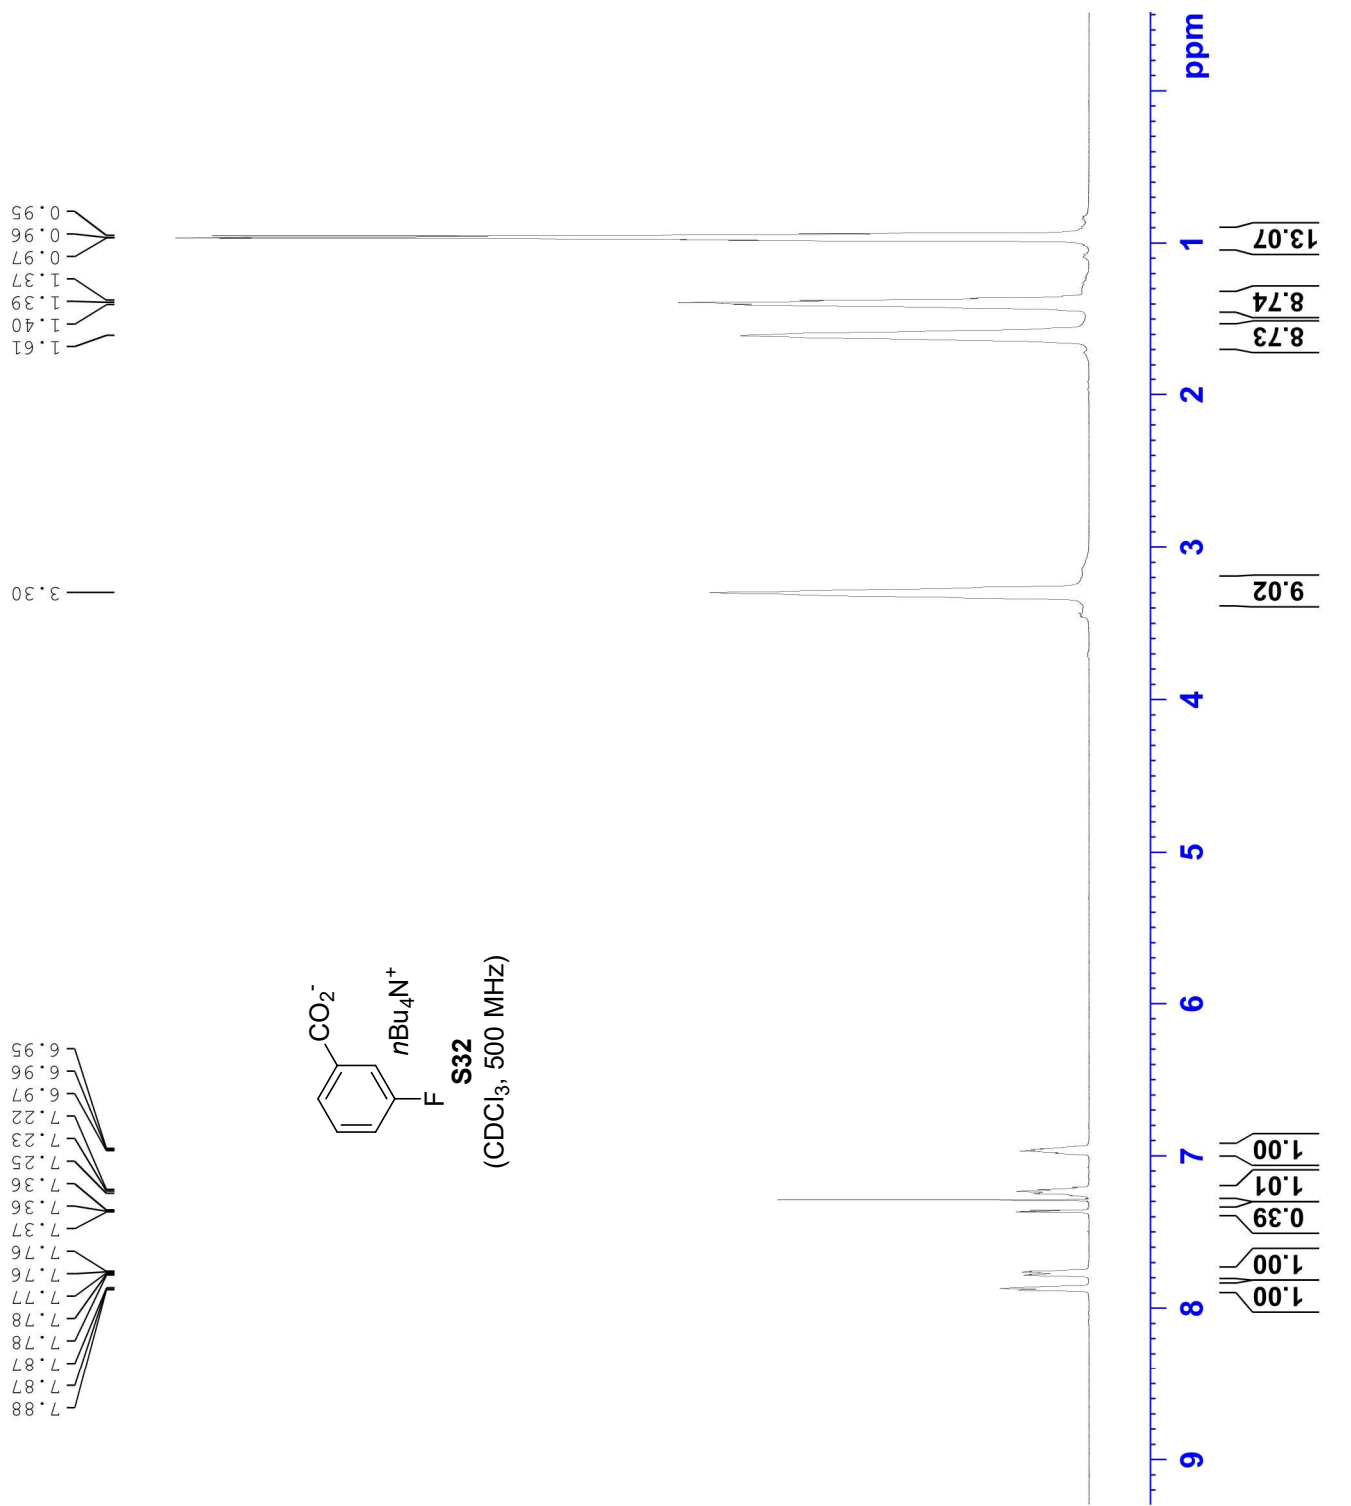

Current Data Parameters  
 NAME Yh-2-66  
 EXPNO 2  
 PROCNO 2

F2 - Acquisition Parameters  
 Date\_ 20180827  
 Time\_ 13.47  
 INSTRUM spect  
 PROBHD 5 mm PABBO BB/  
 PULPROG zgdc  
 TD 187496  
 SOLVENT CDC13  
 NS 43  
 DS 0  
 SWH 31250.000 Hz  
 FIDRES 0.166670 Hz  
 AQ 2.9999361 sec  
 RG 2050  
 DW 16.000 usec  
 DE 6.50 usec  
 TE 296.4 K  
 D1 3.0000000 sec  
 D11 0.0300000 sec  
 TD0 1

==== CHANNEL f1 =====  
 SFO1 125.7049802 MHz  
 NUC1 13C  
 P1 10.00 usec  
 PLW1 72.83999634 W

==== CHANNEL f2 =====  
 SFO2 499.8724993 MHz  
 NUC2 1H  
 CPDPRG[2] waltz16  
 PCPD2 80.00 usec  
 PLW2 19.00000000 W  
 PLW12 0.29688001 W

F2 - Processing parameters  
 SI 1048576  
 SF 125.6924115 MHz  
 WDW EM  
 SSB 0  
 LB 0.30 Hz  
 GB 0  
 PC 1.40

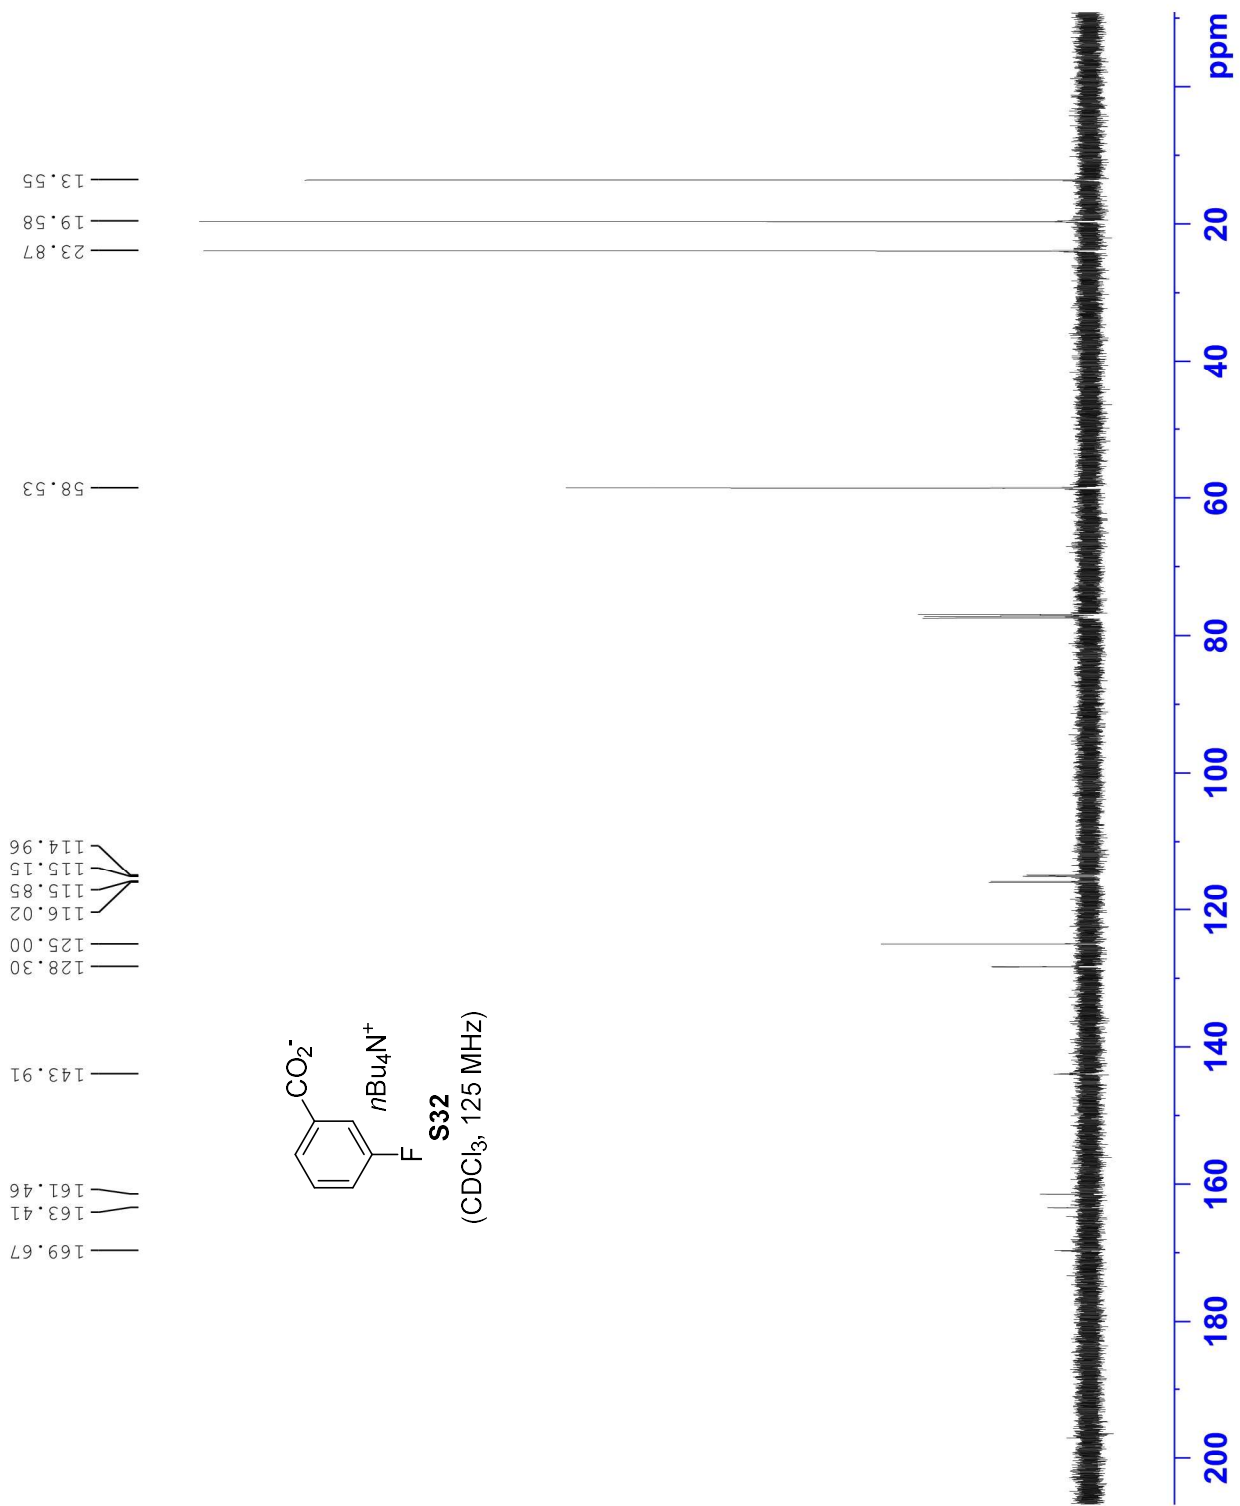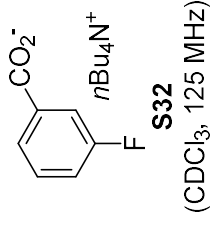



Current Data Parameters  
 NAME yh-2-33  
 EXPNO 1  
 PROCNO 1

F2 - Acquisition Parameters

Date\_ 20180814  
 Time\_ 14.28  
 INSTRUM spect  
 PROBHD 5 mm PATXI 1H/  
 PULPROG zg  
 TD 59998  
 SOLVENT CDC13  
 NS 1  
 DS 0  
 SWH 10000.000 Hz  
 FIDRES 0.166672 Hz  
 AQ 2.9999001 sec  
 RG 20.66  
 DW 50.000 usec  
 DE 10.00 usec  
 TE 294.3 K  
 D1 4.0000000 sec  
 TD0 1

==== CHANNEL f1 =====  
 SFO1 500.1330885 MHz  
 NUC1 1H  
 P1 3.30 usec  
 PLW1 12.19999981 W

F2 - Processing parameters  
 SI 65536  
 SF 500.1300150 MHz  
 EM  
 WDW 0  
 SSB 0  
 LB 0.30 Hz  
 GB 0  
 PC 1.00

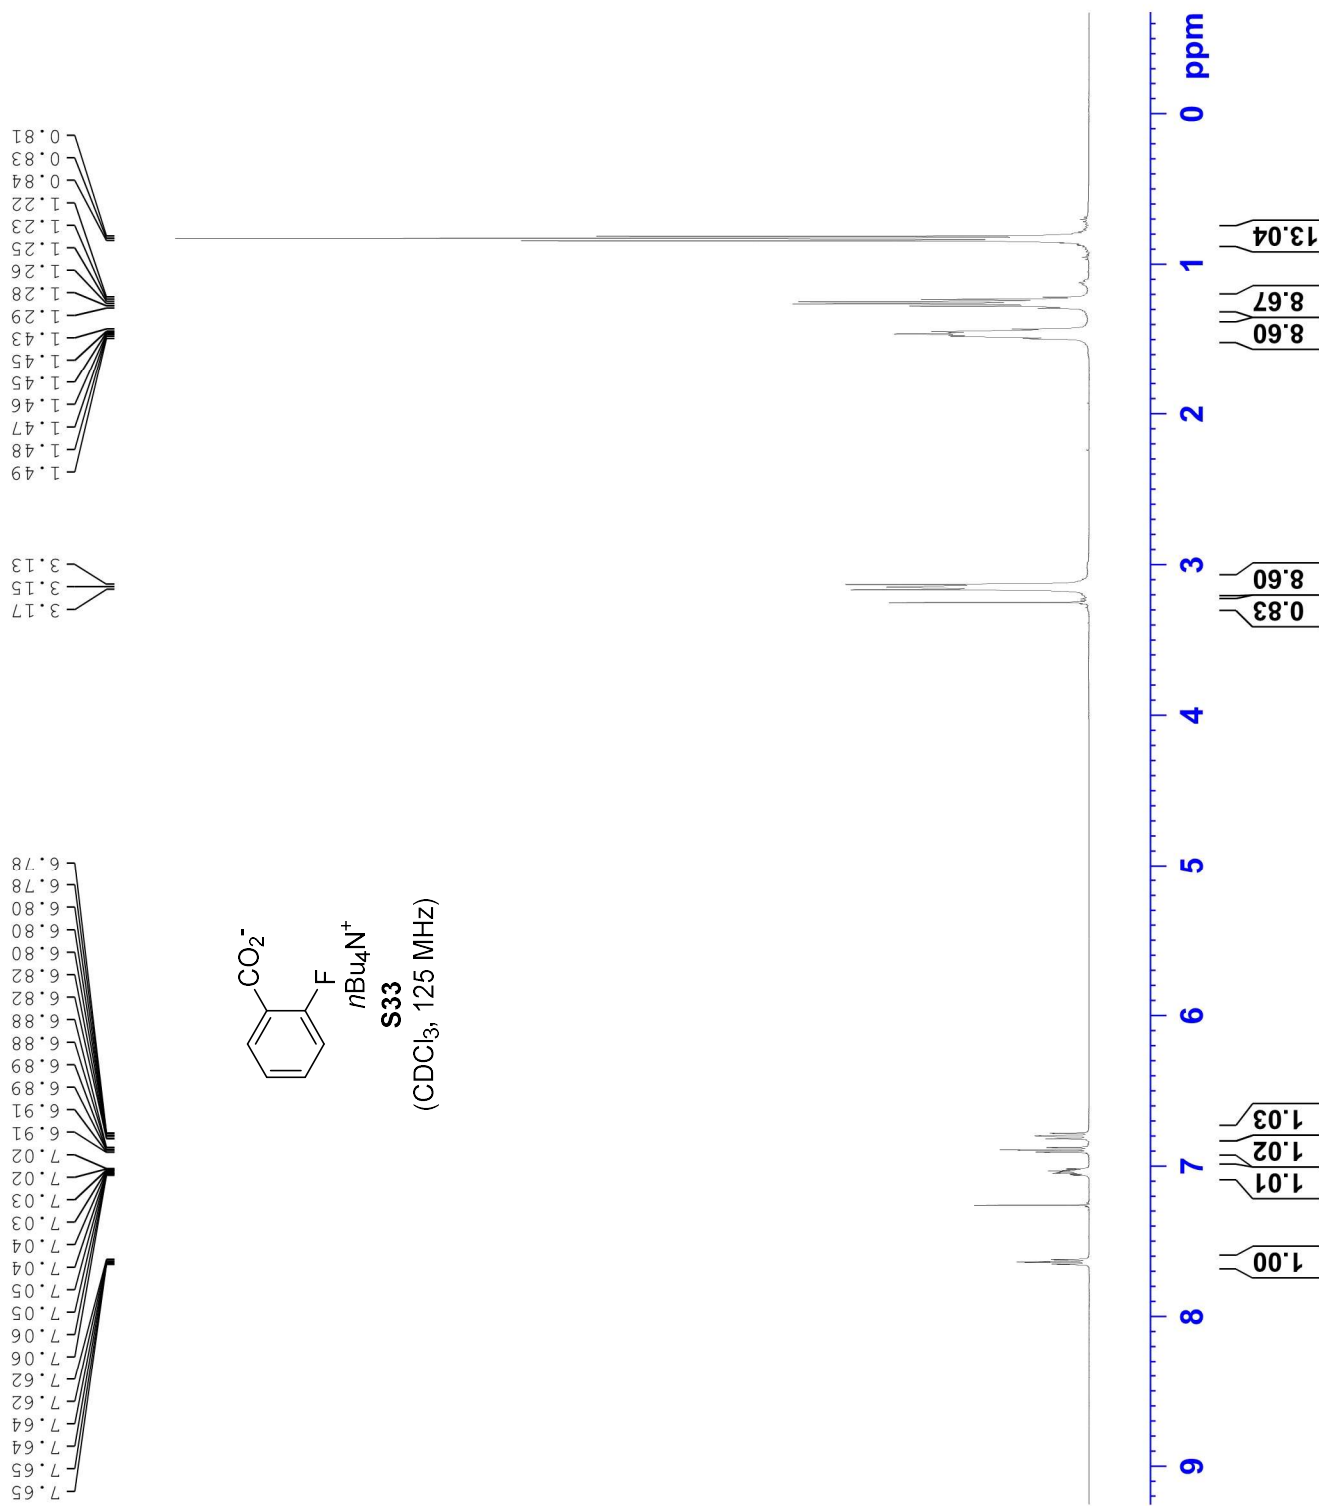

Current Data Parameters  
 NAME Yh-2-33  
 EXPNO 2  
 PROCNO 2

F2 - Acquisition Parameters  
 Date\_ 20180814  
 Time\_ 14.55  
 INSTRUM spect  
 PROBHD 5 mm PABBO BB/  
 PULPROG zgdc  
 TD 187496  
 SOLVENT CDC13  
 NS 17  
 DS 0  
 SWH 31250.000 Hz  
 FIDRES 0.166670 Hz  
 AQ 2.9999361 sec  
 RG 2050  
 DW 16.000 usec  
 DE 6.50 usec  
 TE 296.0 K  
 D1 4.00000000 sec  
 D11 0.03000000 sec  
 TD0 1

==== CHANNEL f1 =====  
 SFO1 125.7049802 MHz  
 NUC1 13C  
 P1 3.33 usec  
 PLW1 72.83999634 W

==== CHANNEL f2 =====  
 SFO2 499.8724993 MHz  
 NUC2 1H  
 CPDPRG[2] waltz16  
 PCPD2 80.00 usec  
 PLW2 19.00000000 W  
 PLW12 0.29688001 W

F2 - Processing parameters  
 SI 1048576  
 SF 125.6924115 MHz  
 WDW EM  
 SSB 0  
 LB 0.30 Hz  
 GB 0  
 PC 1.40

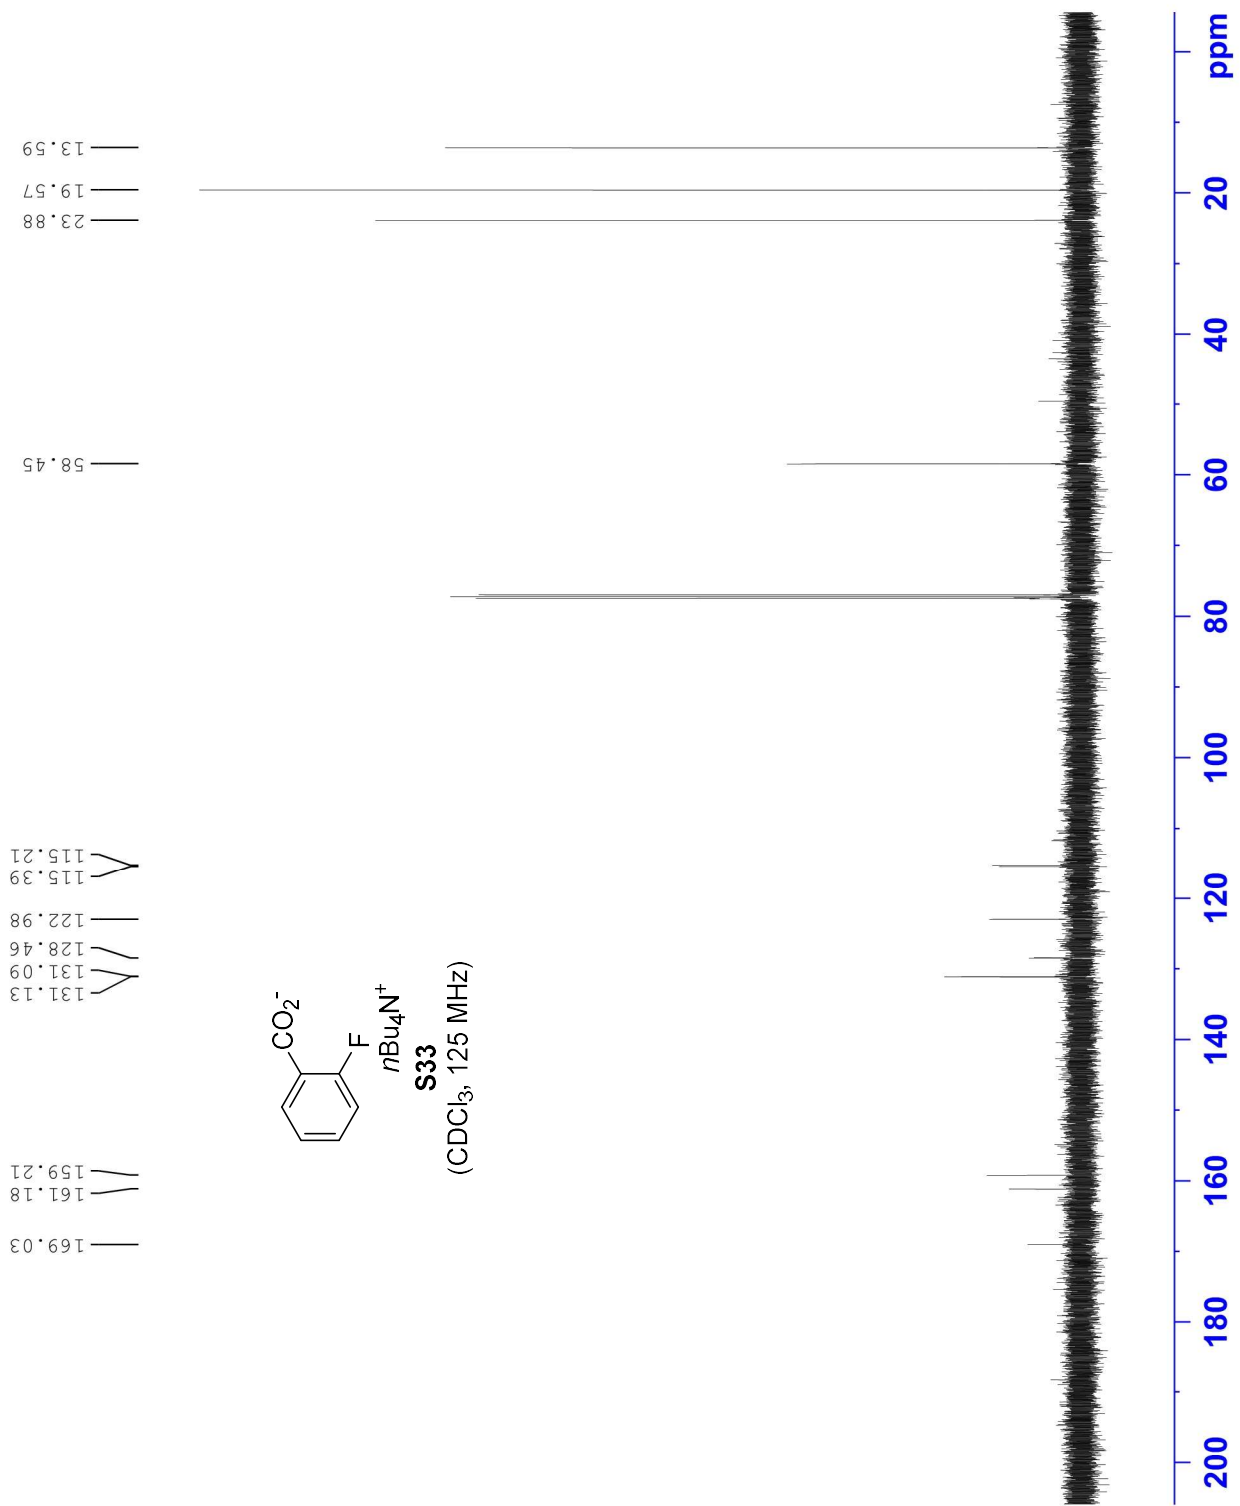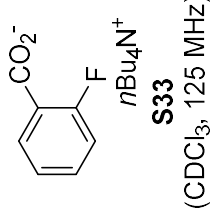

Current Data Parameters  
 NAME glycinate  
 EXPNO 1  
 PROCNO 1

F2 - Acquisition Parameters  
 Date\_ 20190715  
 Time\_ 11.52  
 INSTRUM spect  
 PROBHD 5 mm PABBO BB/  
 PULPROG zg  
 TD 59998  
 SOLVENT CDC13  
 NS 4  
 DS 0  
 SWH 10000.000 Hz  
 FIDRES 0.166672 Hz  
 AQ 2.9999001 sec  
 RG 159.35  
 DW 50.000 usec  
 DE 6.50 usec  
 TE 295.7 K  
 D1 4.0000000 sec  
 TD0 1

==== CHANNEL f1 =====  
 SFO1 499.8730869 MHz  
 NUC1 1H  
 P1 3.58 usec  
 PLW1 18.25000000 W

F2 - Processing parameters  
 SI 65536  
 SF 499.8700120 MHz  
 EM  
 WDW 0  
 SSB 0  
 LB 0.30 Hz  
 GB 0  
 PC 1.00

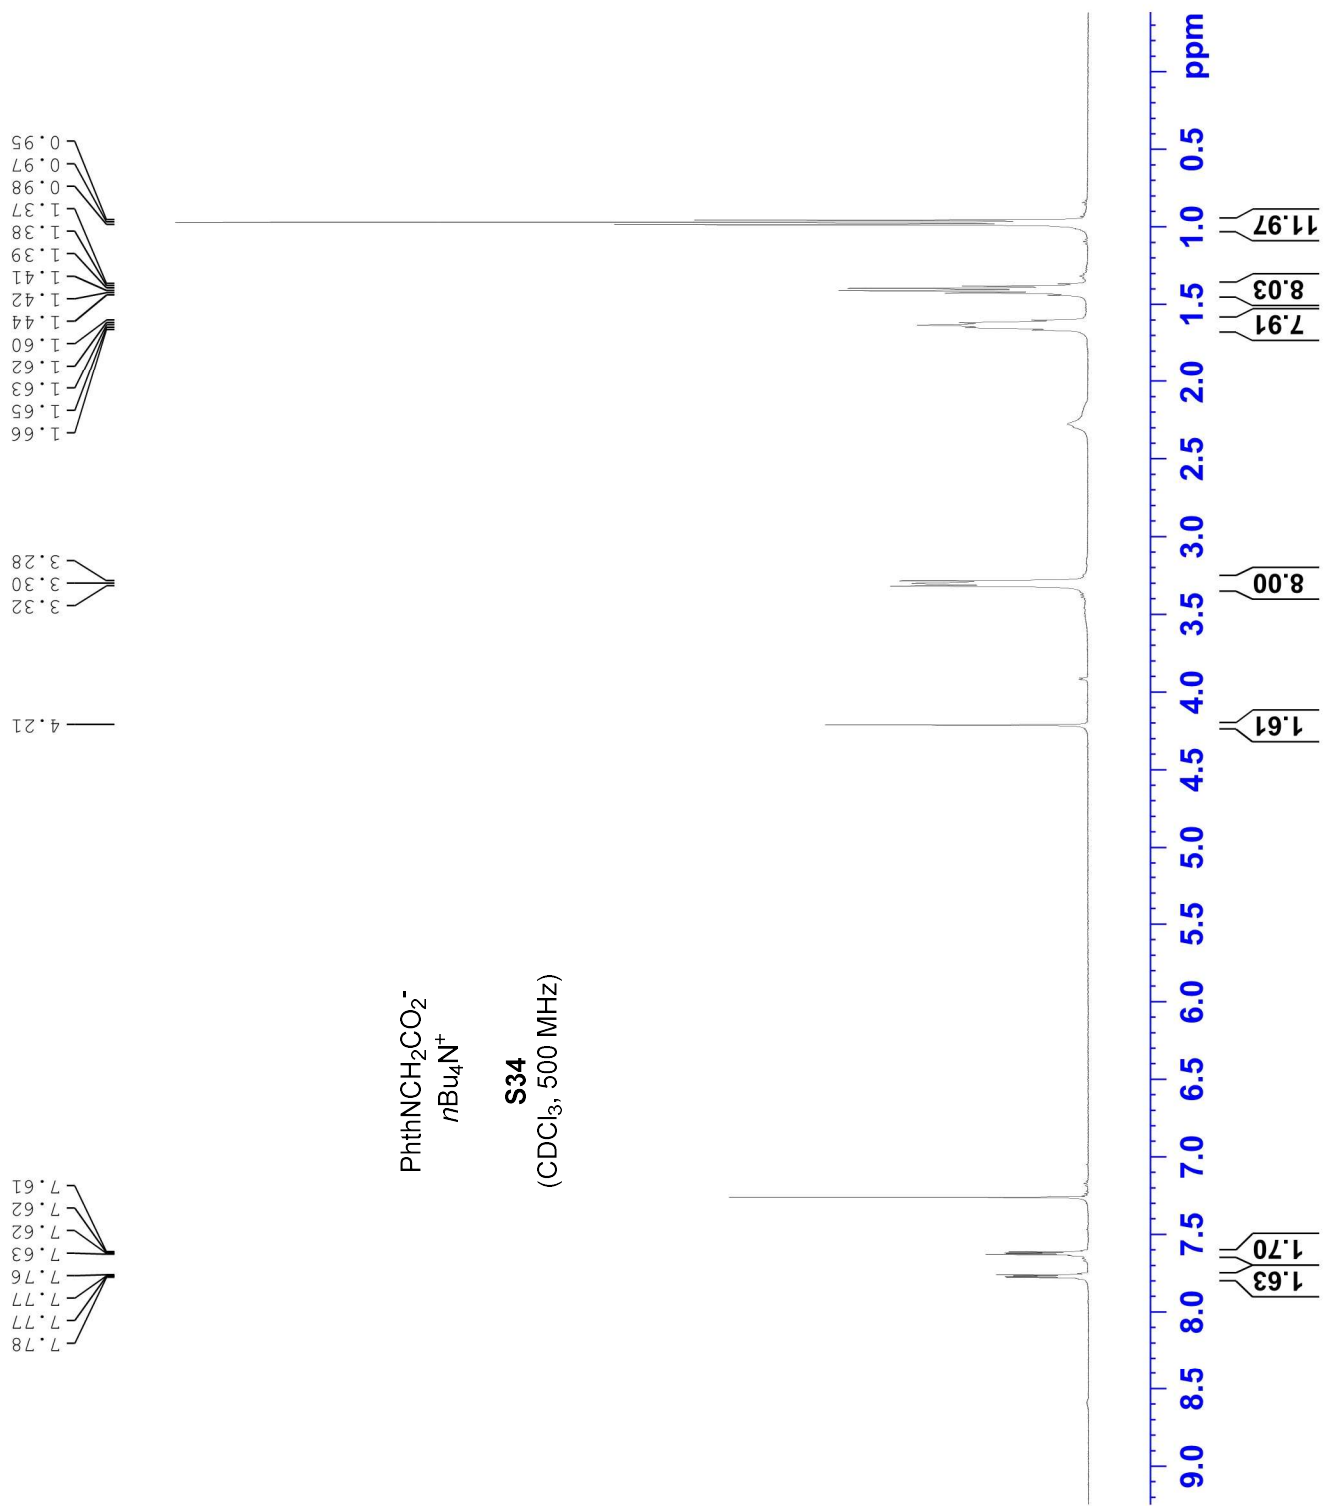

Current Data Parameters  
 NAME glycinate  
 EXPNO 2  
 PROCNO 2

F2 - Acquisition Parameters  
 Date\_ 20190715  
 Time\_ 12.27  
 INSTRUM spect  
 PROBHD 5 mm PABBO BB/  
 PULPROG zgdc  
 TD 187496  
 SOLVENT CDC13  
 NS 102  
 DS 0  
 SWH 31250.000 Hz  
 FIDRES 0.166670 Hz  
 AQ 2.9999361 sec  
 RG 2050  
 DW 16.000 usec  
 DE 6.50 usec  
 TE 297.5 K  
 D1 3.00000000 sec  
 D11 0.03000000 sec  
 TD0 1

==== CHANNEL f1 =====  
 SFO1 125.7049802 MHz  
 NUC1 13C  
 P1 10.00 usec  
 PLW1 72.83999634 W

==== CHANNEL f2 =====  
 SFO2 499.8724993 MHz  
 NUC2 1H  
 CPDPRG[2] waltz16  
 PCPD2 80.00 usec  
 PLW2 19.00000000 W  
 PLW12 0.29688001 W

F2 - Processing parameters  
 SI 1048576  
 SF 125.6924115 MHz  
 WDW EM  
 SSB 0  
 LB 0.30 Hz  
 GB 0  
 PC 1.40

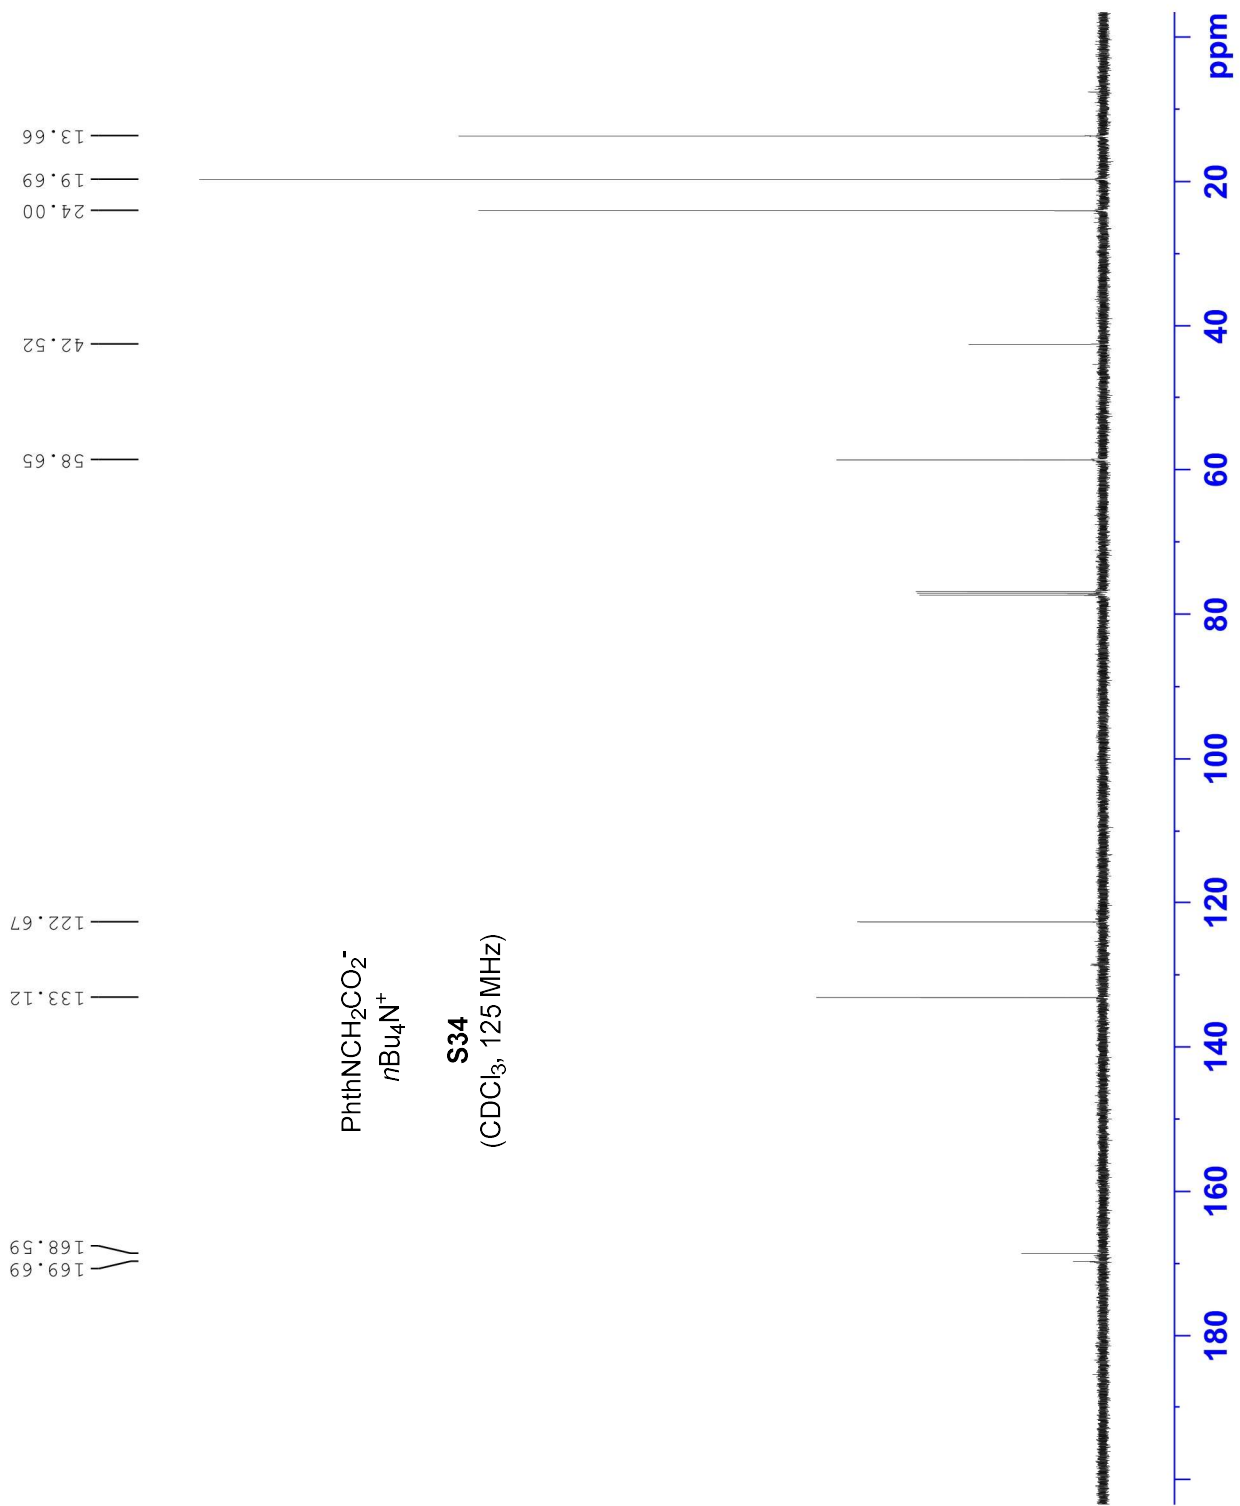

Current Data Parameters  
 NAME yh-2-23  
 EXPNO 1  
 PROCNO 1

F2 - Acquisition Parameters  
 Date\_ 20180829  
 Time\_ 11.09  
 INSTRUM spect  
 PROBHD 5 mm PAQNP 1H/  
 PULPROG zg  
 TD 44998  
 SOLVENT CDC13  
 NS 1  
 DS 0  
 SWH 7500.000 Hz  
 FIDRES 0.166674 Hz  
 AQ 2.9998667 sec  
 RG 16  
 DW 66.667 usec  
 DE 71.43 usec  
 TE 295.0 K  
 D1 3.0000000 sec  
 TD0 1

==== CHANNEL f1 =====  
 NUC1 1H  
 P1 14.50 usec  
 PL1 0 dB  
 PL1W 24.54113007 W  
 SFO1 500.1330008 MHz

F2 - Processing parameters  
 SI 32768  
 SF 500.1300168 MHz  
 WDW EM  
 SSB 0  
 LB 0.30 Hz  
 GB 0  
 PC 1.00

1.81  
1.75  
1.57  
1.57  
1.52  
1.51  
1.50  
1.49  
1.49  
1.32  
1.31  
1.29  
1.28  
1.26  
1.25  
1.25  
1.00  
1.00  
1.00  
1.00  
1.00  
1.00

3.25  
3.23  
3.22

AdCH<sub>2</sub>CO<sub>2</sub><sup>-</sup>  
*n*Bu<sub>4</sub>N<sup>+</sup>  
**S35**  
 (CDCl<sub>3</sub>, 500 MHz)

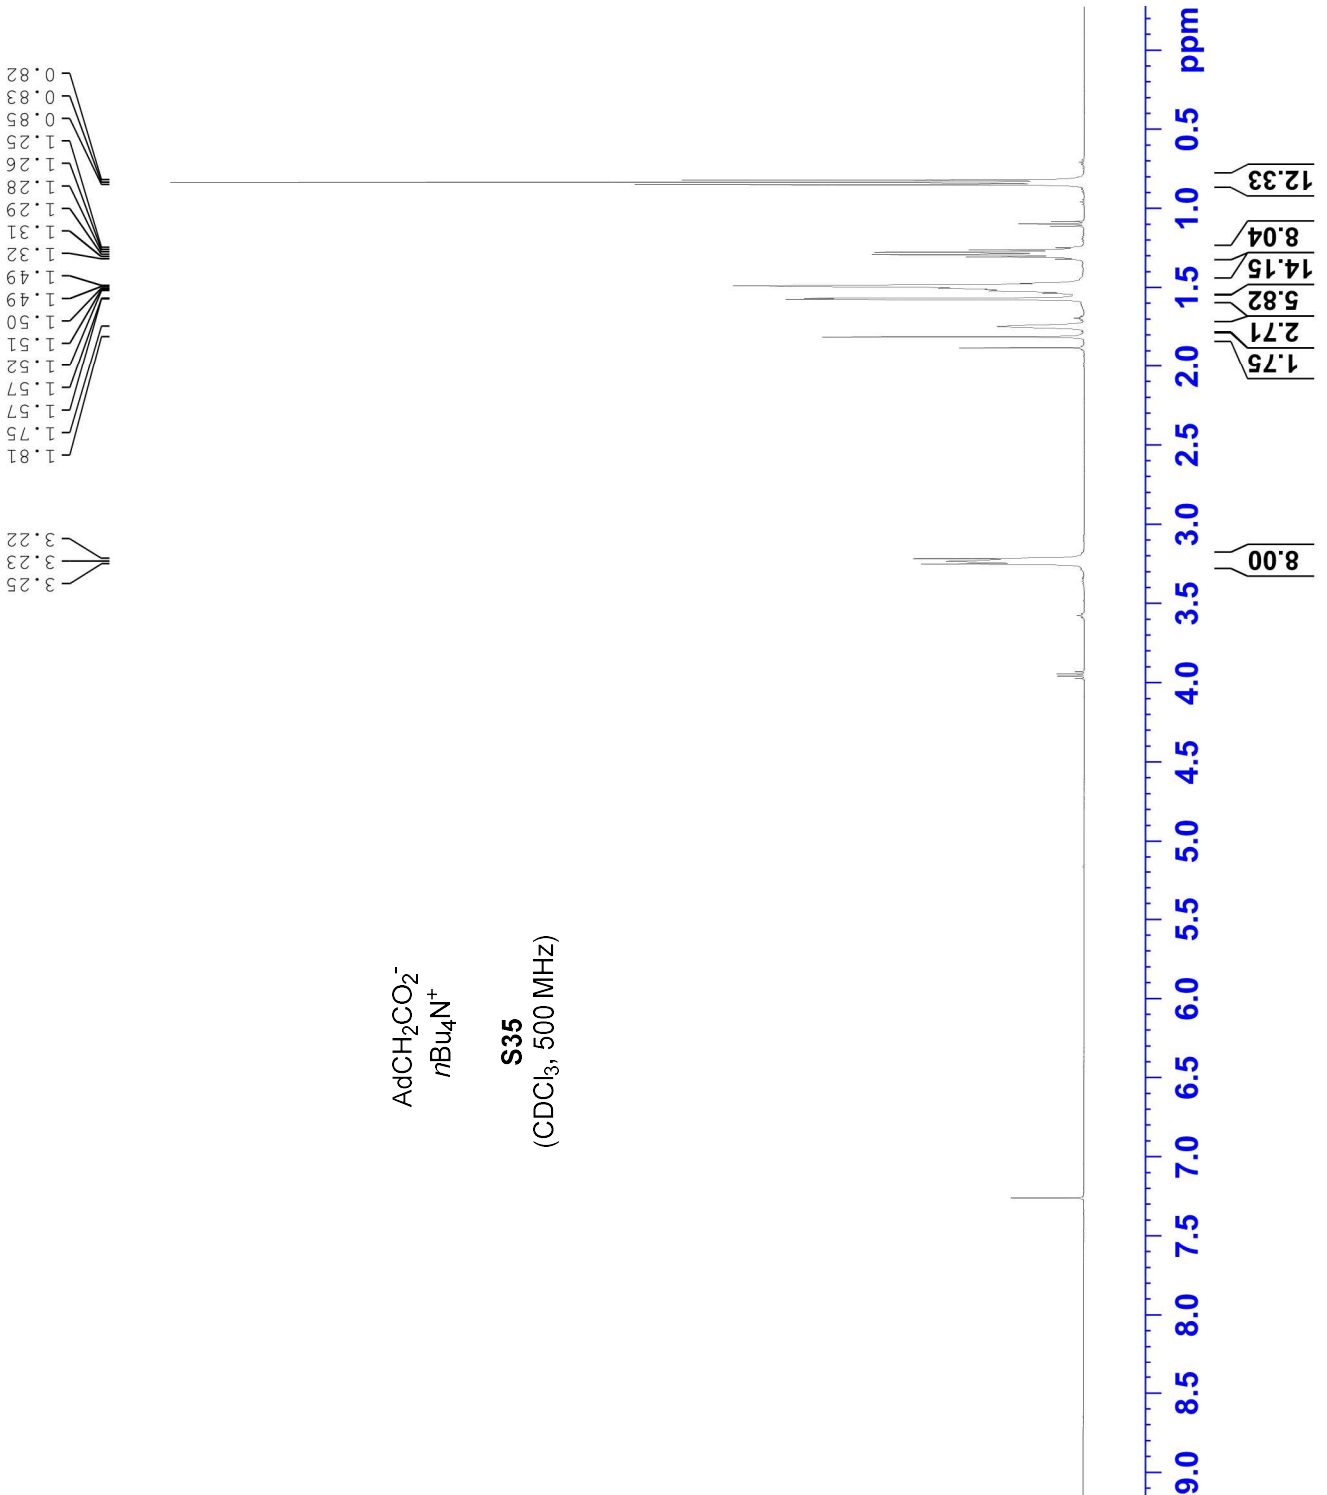

Current Data Parameters  
 NAME yh-2-23  
 EXPNO 2  
 PROCNO 2

F2 - Acquisition Parameters  
 Date\_ 20180829  
 Time\_ 11.15  
 INSTRUM spect  
 PROBHD 5 mm PAQNP 1H/  
 PULPROG zgpg  
 TD 197364  
 SOLVENT CDC13  
 NS 2  
 DS 0  
 SWH 32894.738 Hz  
 FIDRES 0.166670 Hz  
 AQ 2.9999328 sec  
 RG 2050  
 DW 15.200 usec  
 DE 6.00 usec  
 TE 295.3 K  
 D1 10.00000000 sec  
 D11 0.03000000 sec  
 TD0 1

==== CHANNEL f1 =====  
 NUC1 13C  
 P1 9.90 usec  
 PL1 1.00 dB  
 PL1W 72.42802429 W  
 SFO1 125.7716224 MHz

==== CHANNEL f2 =====  
 CPDPRG[2] waltz16  
 NUC2 1H  
 PCPD2 80.00 usec  
 PL2 0 dB  
 PL12 16.50 dB  
 PL13 17.00 dB  
 PL2W 24.54113007 W  
 PL12W 0.54940748 W  
 PL13W 0.48965994 W  
 SFO2 500.1325006 MHz

F2 - Processing parameters  
 SI 131072  
 SF 125.7577890 MHz  
 WDW EM  
 SSB 0  
 LB 0.30 Hz  
 GB 0  
 PC 1.40

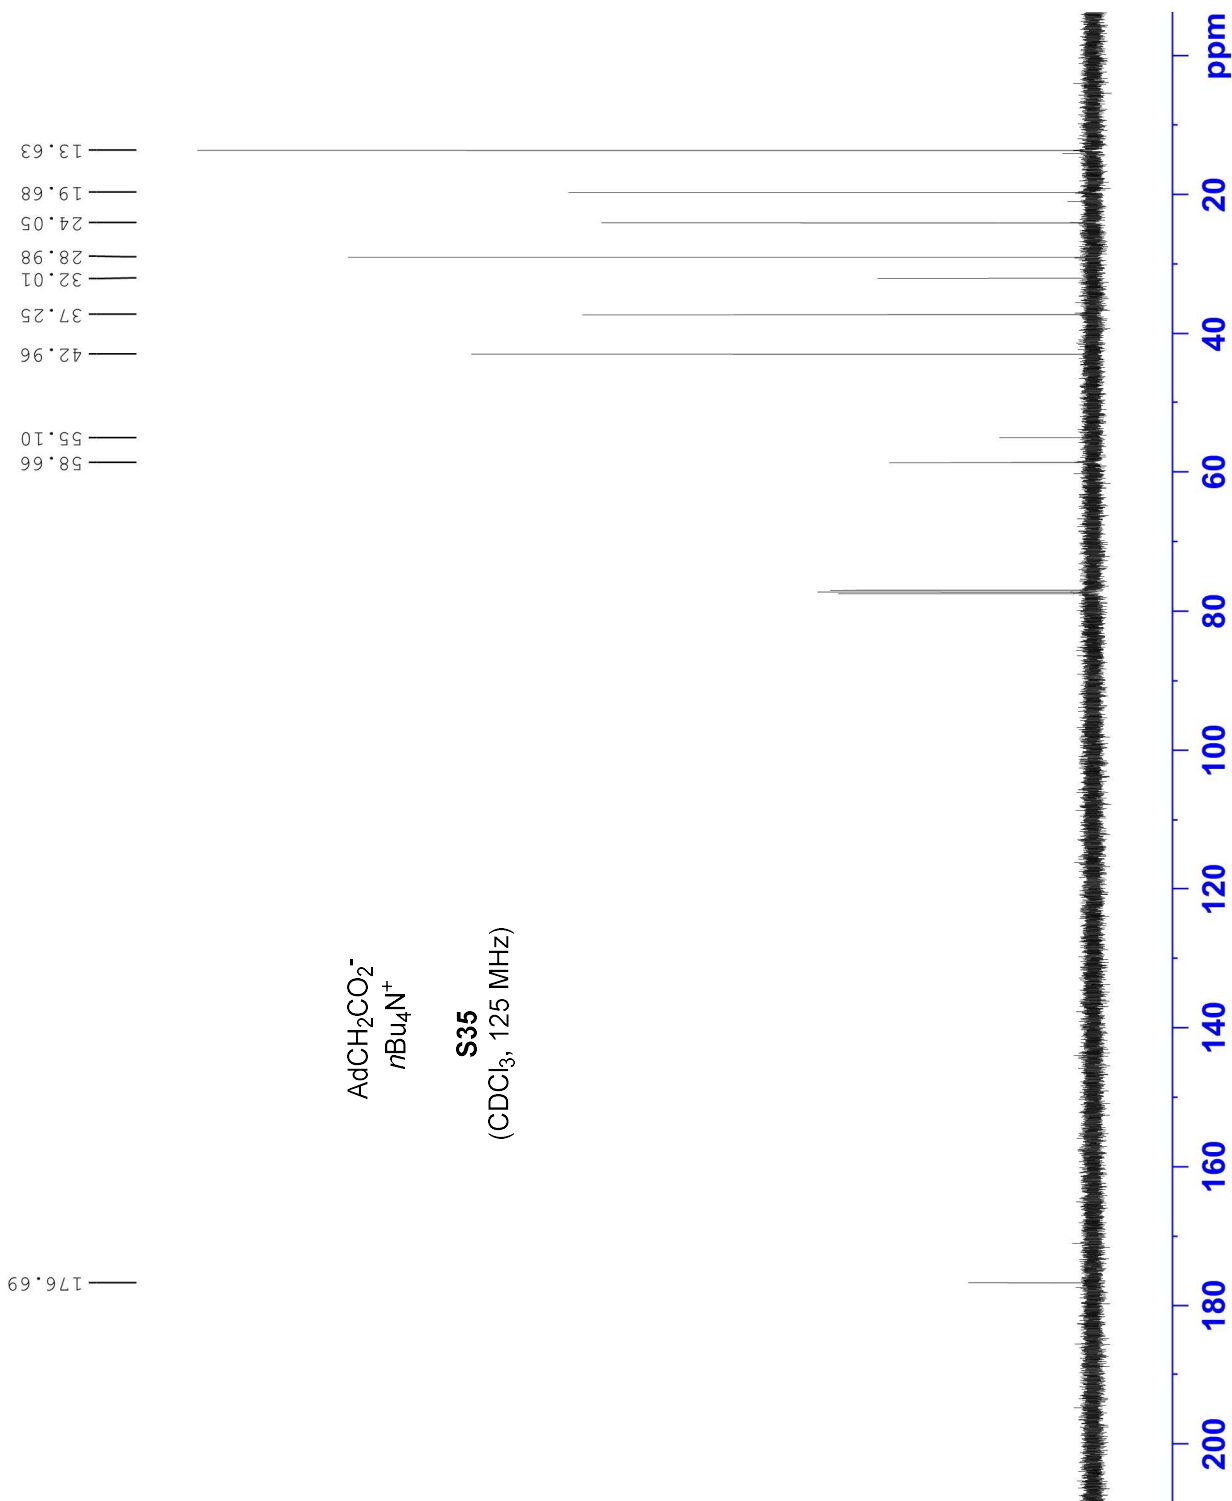

Current Data Parameters  
 NAME yh-2-71  
 EXPNO 1  
 PROCNO 1

F2 - Acquisition Parameters

Date\_ 20180814  
 Time\_ 22.35  
 INSTRUM spect  
 PROBHD 5 mm PABBO BB/  
 PULPROG zg  
 TD 59998  
 SOLVENT CDC13  
 NS 2  
 DS 0  
 SWH 10000.000 Hz  
 FIDRES 0.166672 Hz  
 AQ 2.9999001 sec  
 RG 22.37  
 DW 50.000 usec  
 DE 6.50 usec  
 TE 296.0 K  
 D1 4.0000000 sec  
 TD0 1

==== CHANNEL f1 =====  
 SFO1 499.8730869 MHz  
 NUC1 1H  
 P1 3.58 usec  
 PLW1 18.25000000 W

F2 - Processing parameters  
 SI 65536  
 SF 499.8700132 MHz  
 EM  
 WDW 0  
 SSB 0.30 Hz  
 LB 0  
 GB 0  
 PC 1.00

3.26  
 3.27  
 3.29  
 1.87  
 1.84  
 1.64  
 1.61  
 1.60  
 1.58  
 1.57  
 1.55  
 1.41  
 1.39  
 1.38  
 1.38  
 1.37  
 1.35  
 1.34  
 1.31  
 1.29  
 1.28  
 1.27  
 1.26

AdCO<sub>2</sub><sup>-</sup>  
 nBu<sub>4</sub>N<sup>+</sup>  
**S36**  
 (CDCl<sub>3</sub>, 500 MHz)

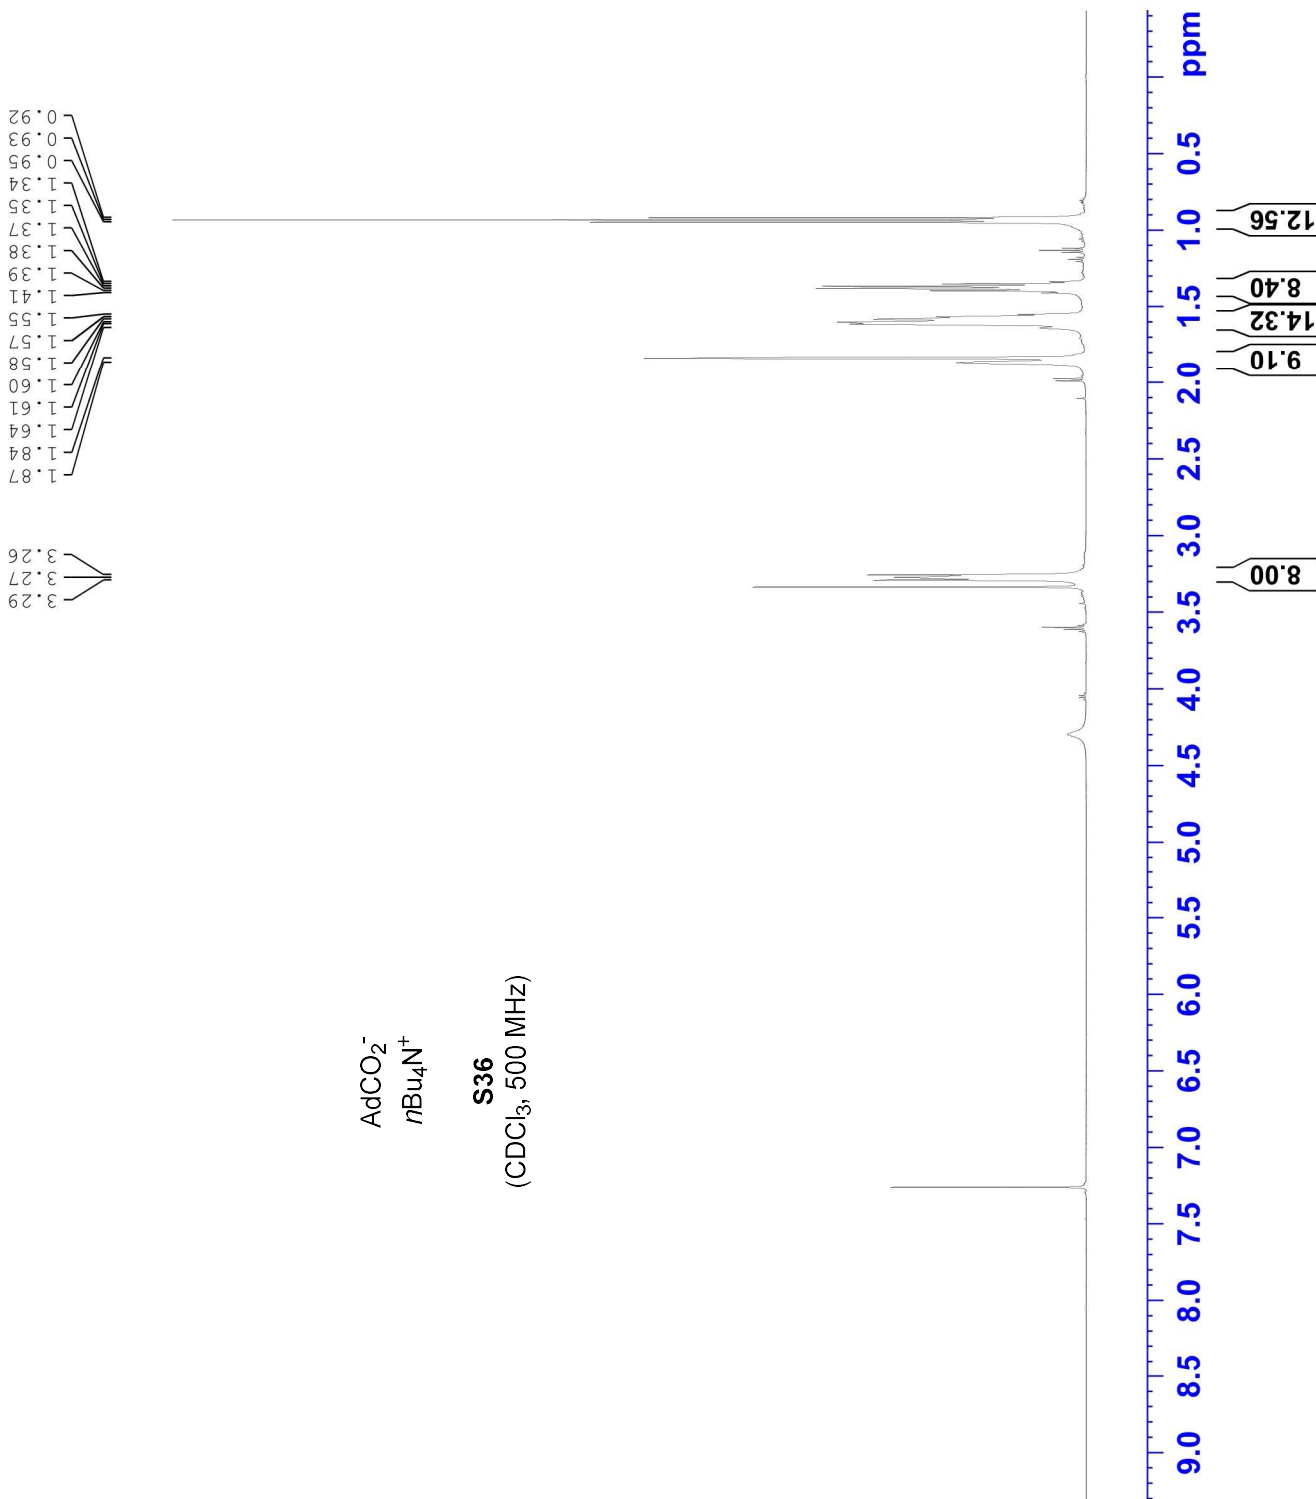

183.17

58.70  
49.76  
41.80  
40.69  
37.36  
29.03  
24.07  
19.74  
13.71

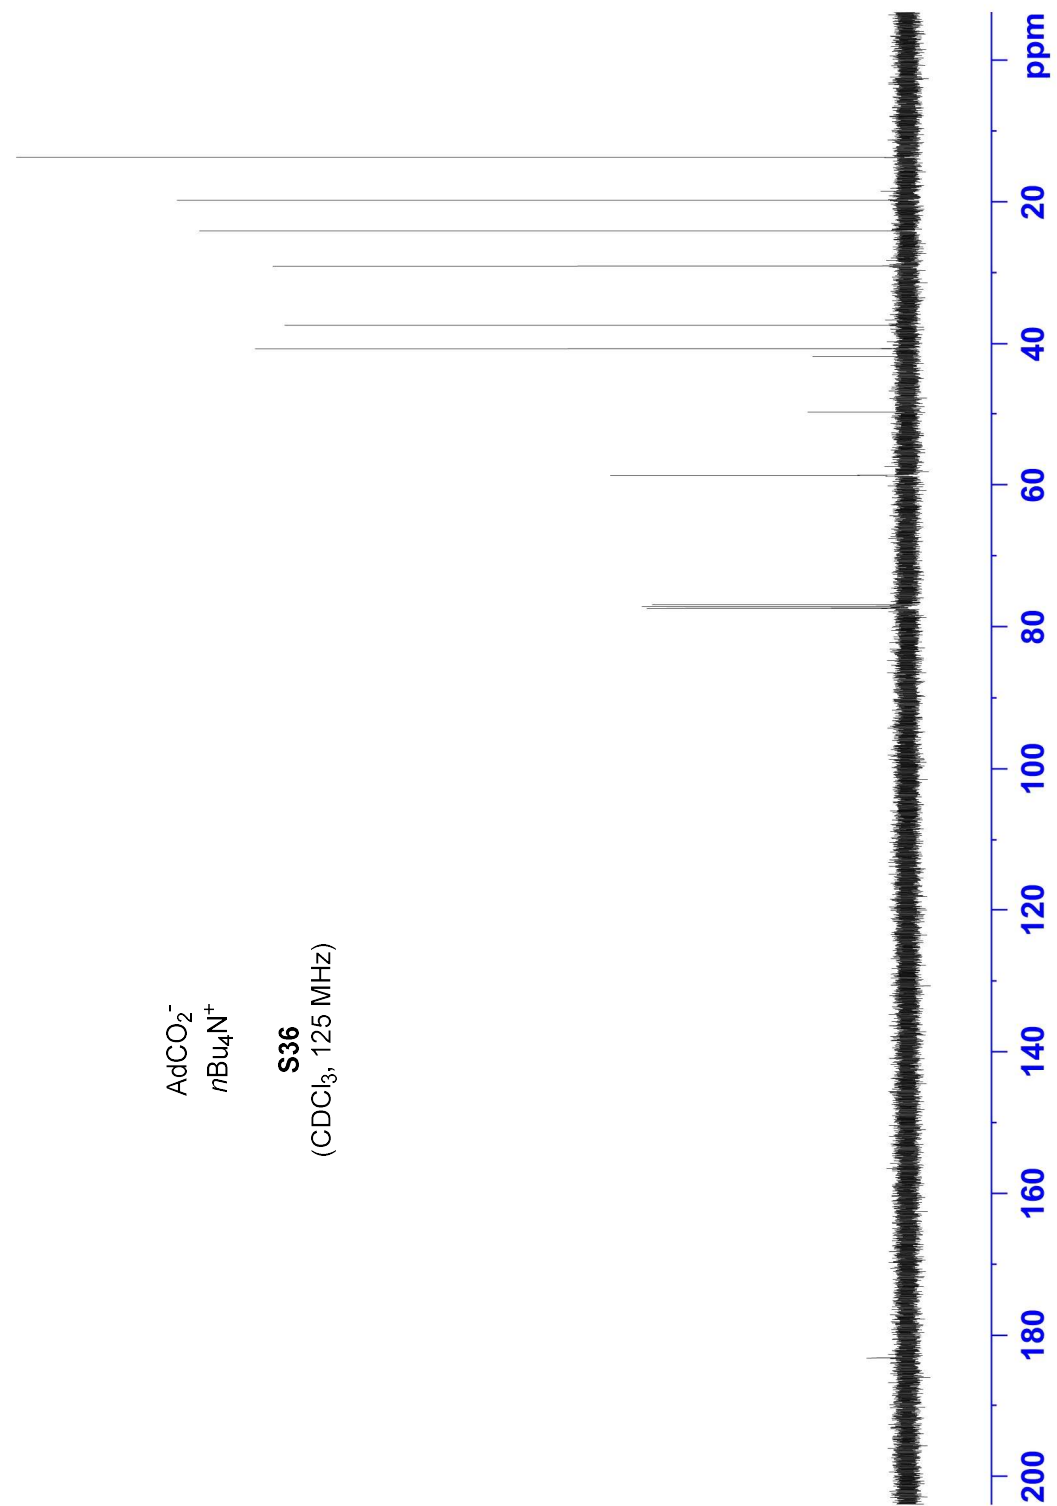

AdCO<sub>2</sub><sup>-</sup>  
*n*Bu<sub>4</sub>N<sup>+</sup>  
**S36**  
 (CDCl<sub>3</sub>, 125 MHz)

Current Data Parameters  
 NAME Yh-2-71  
 EXPNO 2  
 PROCNO 2

F2 - Acquisition Parameters  
 Date\_ 20180814  
 Time\_ 22.40  
 INSTRUM spect  
 PROBHD 5 mm PABBO BB/  
 PULPROG zgdc  
 TD 187496  
 SOLVENT CDCl3  
 NS 7  
 DS 0  
 SWH 31250.000 Hz  
 FIDRES 0.166670 Hz  
 AQ 2.9999361 sec  
 RG 2050  
 DW 16.000 usec  
 DE 6.50 usec  
 TE 296.1 K  
 D1 3.0000000 sec  
 D11 0.0300000 sec  
 TD0 1

==== CHANNEL f1 =====  
 SFO1 125.7049802 MHz  
 NUC1 13C  
 P1 10.00 usec  
 PLW1 72.83999634 W

==== CHANNEL f2 =====  
 SFO2 499.8724993 MHz  
 NUC2 1H  
 CPDPRG[2] waltz16  
 PCPD2 80.00 usec  
 PLW2 19.00000000 W  
 PLW12 0.29688001 W

F2 - Processing parameters  
 SI 1048576  
 SF 125.6924115 MHz  
 WDW EM  
 SSB 0  
 LB 0.30 Hz  
 GB 0  
 PC 1.40



Current Data Parameters  
 NAME yh-3-15  
 EXPNO 1  
 PROCNO 1

F2 - Acquisition Parameters

Date\_ 20180815  
 Time\_ 20.23  
 INSTRUM spect  
 PROBHD 5 mm PABBO BB/  
 PULPROG zg  
 TD 59998  
 SOLVENT CDC13  
 NS 3  
 DS 0  
 SWH 10000.000 Hz  
 FIDRES 0.166672 Hz  
 AQ 2.9999001 sec  
 RG 19.64  
 DW 50.000 usec  
 DE 6.50 usec  
 TE 296.0 K  
 D1 4.0000000 sec  
 TD0 1

==== CHANNEL f1 =====  
 SFO1 499.8730869 MHz  
 NUC1 1H  
 P1 3.58 usec  
 PLW1 18.25000000 W

F2 - Processing parameters  
 SI 65536  
 SF 499.8700134 MHz  
 EM  
 WDW 0  
 SSB 0.30 Hz  
 LB 0  
 GB 0  
 PC 1.00

3.24  
 3.20  
 1.57  
 1.56  
 1.55  
 1.54  
 1.53  
 1.52  
 1.51  
 1.37  
 1.35  
 1.34  
 1.31  
 1.29  
 1.04  
 0.90  
 0.89  
 0.87

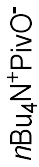

**S37**  
 ( $\text{CDCl}_3$ , 500 MHz)

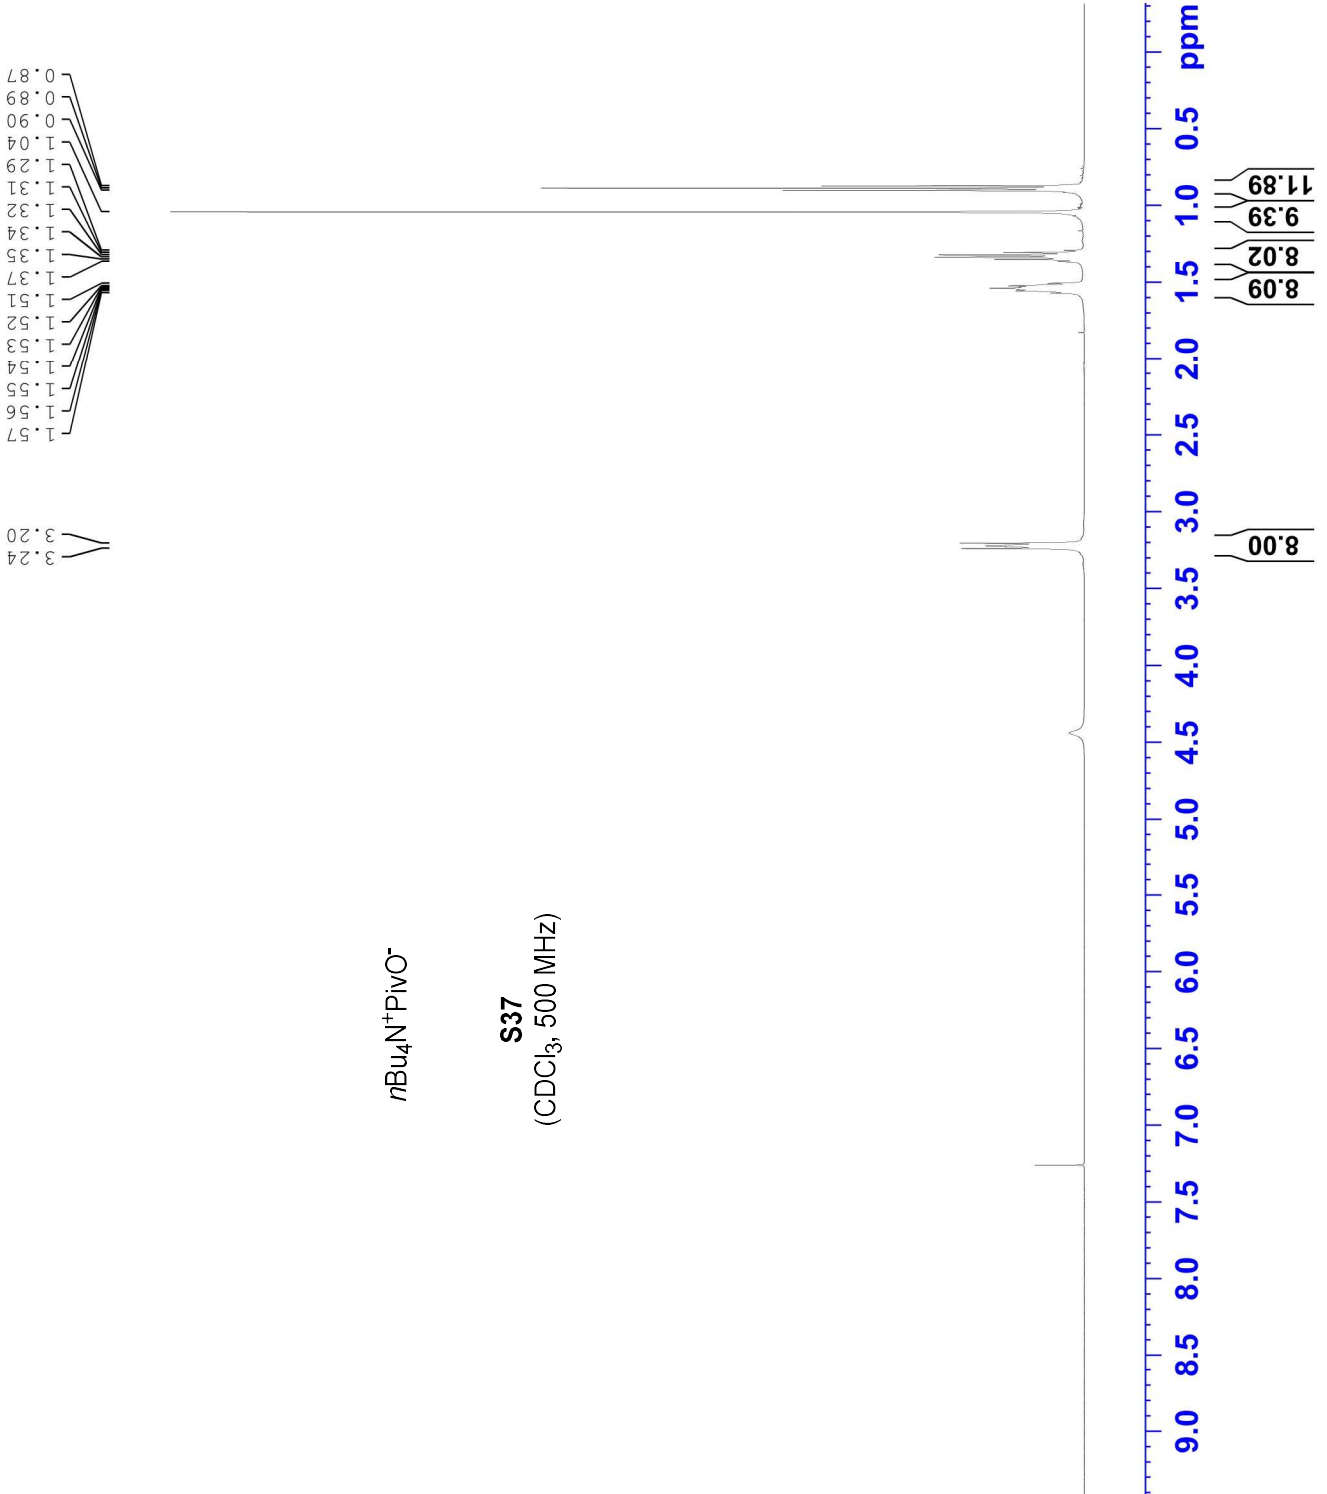

183.44

58.59

39.52

28.91

23.98

19.67

13.66

$n\text{Bu}_4\text{N}^+\text{PivO}^-$

**S37**  
( $\text{CDCl}_3$ , 125 MHz)

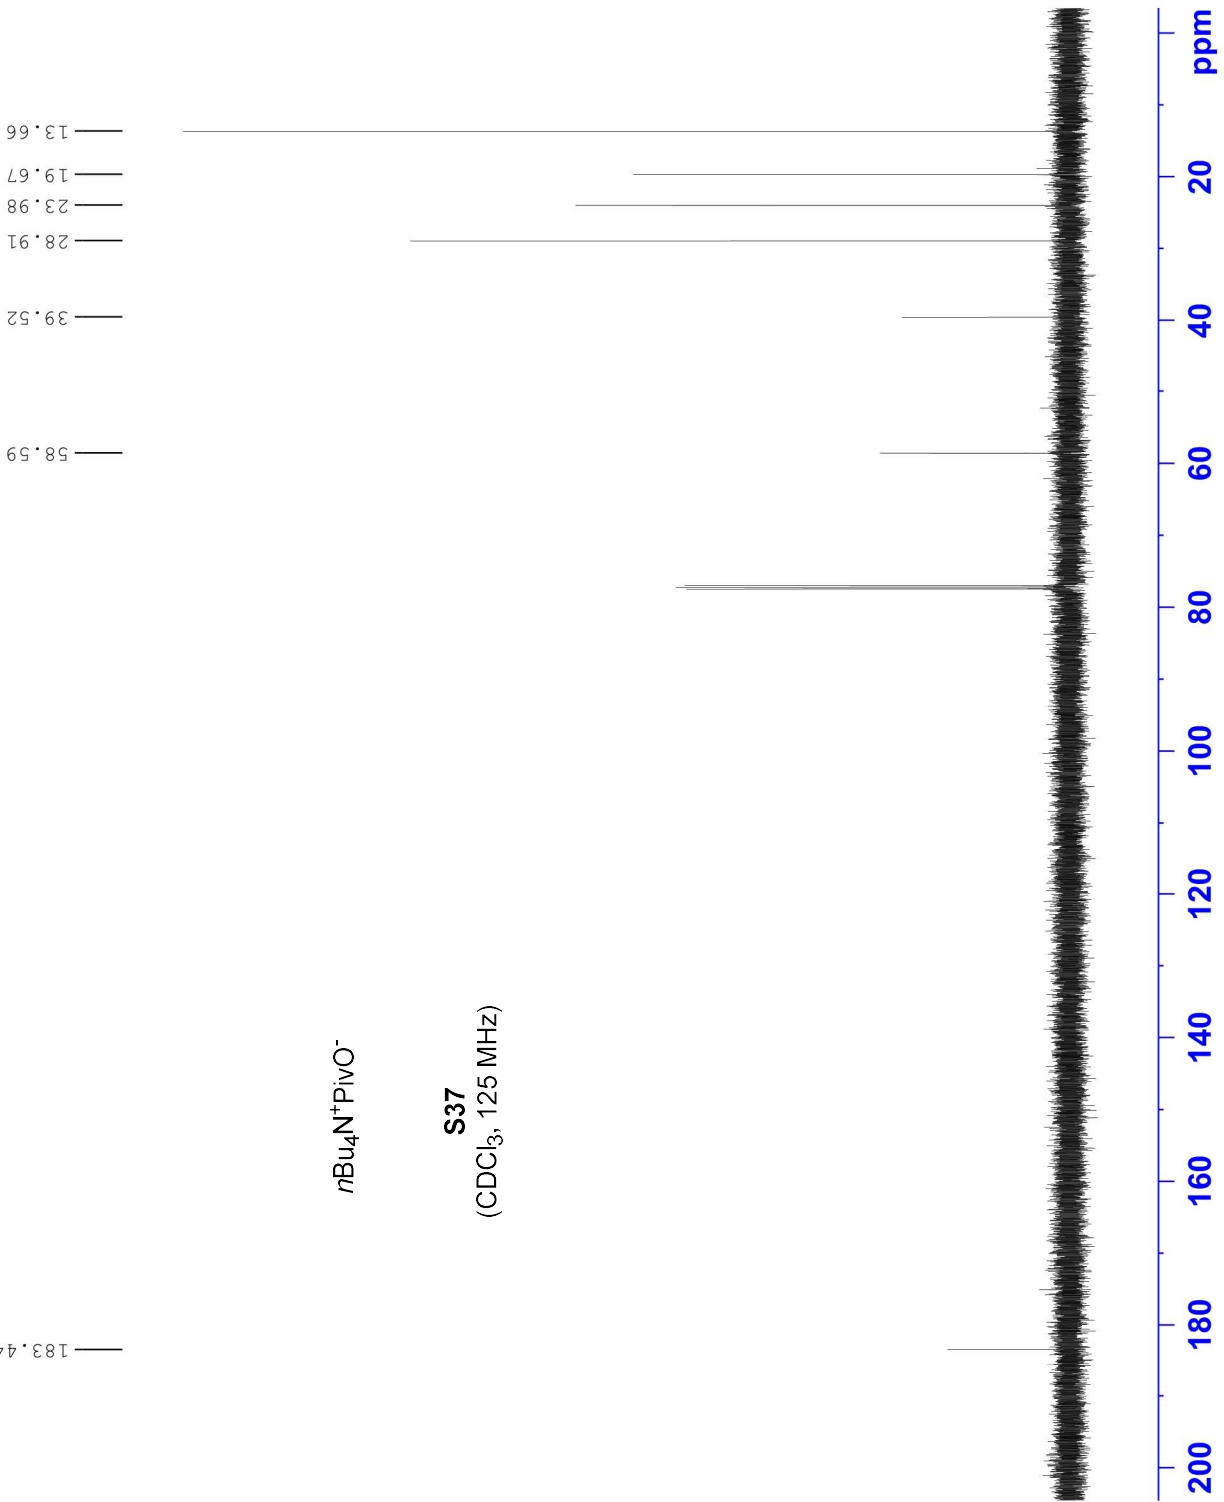

Current Data Parameters  
 NAME Yh-3-15  
 EXPNO 2  
 PROCNO 2

F2 - Acquisition Parameters  
 Date\_ 20180815  
 Time 20.38  
 INSTRUM spect  
 PROBHD 5 mm PAQNP 1H/  
 PULPROG zgpg  
 TD 197364  
 SOLVENT CDC13  
 NS 1  
 DS 0  
 SWH 32894.738 Hz  
 FIDRES 0.166670 Hz  
 AQ 2.9999328 sec  
 RG 2050  
 DW 15.200 usec  
 DE 6.00 usec  
 TE 294.4 K  
 D1 10.00000000 sec  
 D11 0.03000000 sec  
 TD0 1

==== CHANNEL f1 =====  
 NUC1 13C  
 P1 9.90 usec  
 PL1 1.00 dB  
 PL1W 72.42802429 W  
 SFO1 125.7716224 MHz

==== CHANNEL f2 =====  
 CPDPRG[2] waltz16  
 NUC2 1H  
 PCPD2 80.00 usec  
 PL2 0 dB  
 PL12 16.50 dB  
 PL13 17.00 dB  
 PL2W 24.54113007 W  
 PL12W 0.54940748 W  
 PL13W 0.48965994 W  
 SFO2 500.1325006 MHz

F2 - Processing parameters  
 SI 131072  
 SF 125.7577890 MHz  
 WDW EM  
 SSB 0  
 LB 0.30 Hz  
 GB 0  
 PC 1.40

Current Data Parameters  
 NAME yh-2-139  
 EXPNO 1  
 PROCNO 1

F2 - Acquisition Parameters  
 Date\_ 20180814  
 Time\_ 22.52  
 INSTRUM spect  
 PROBHD 5 mm PABBO BB/  
 PULPROG zg  
 TD 59998  
 SOLVENT CDC13  
 NS 2  
 DS 0  
 SWH 10000.000 Hz  
 FIDRES 0.166672 Hz  
 AQ 2.9999001 sec  
 RG 5.87  
 DW 50.000 usec  
 DE 6.50 usec  
 TE 296.1 K  
 D1 3.0000000 sec  
 TD0 1

==== CHANNEL f1 =====  
 SFO1 499.8730869 MHz  
 NUC1 1H  
 P1 10.75 usec  
 PLW1 18.2500000 W

F2 - Processing parameters  
 SI 65536  
 SF 499.8700140 MHz  
 EM  
 WDW 0  
 SSB 0  
 LB 0.30 Hz  
 GB 0  
 PC 1.00

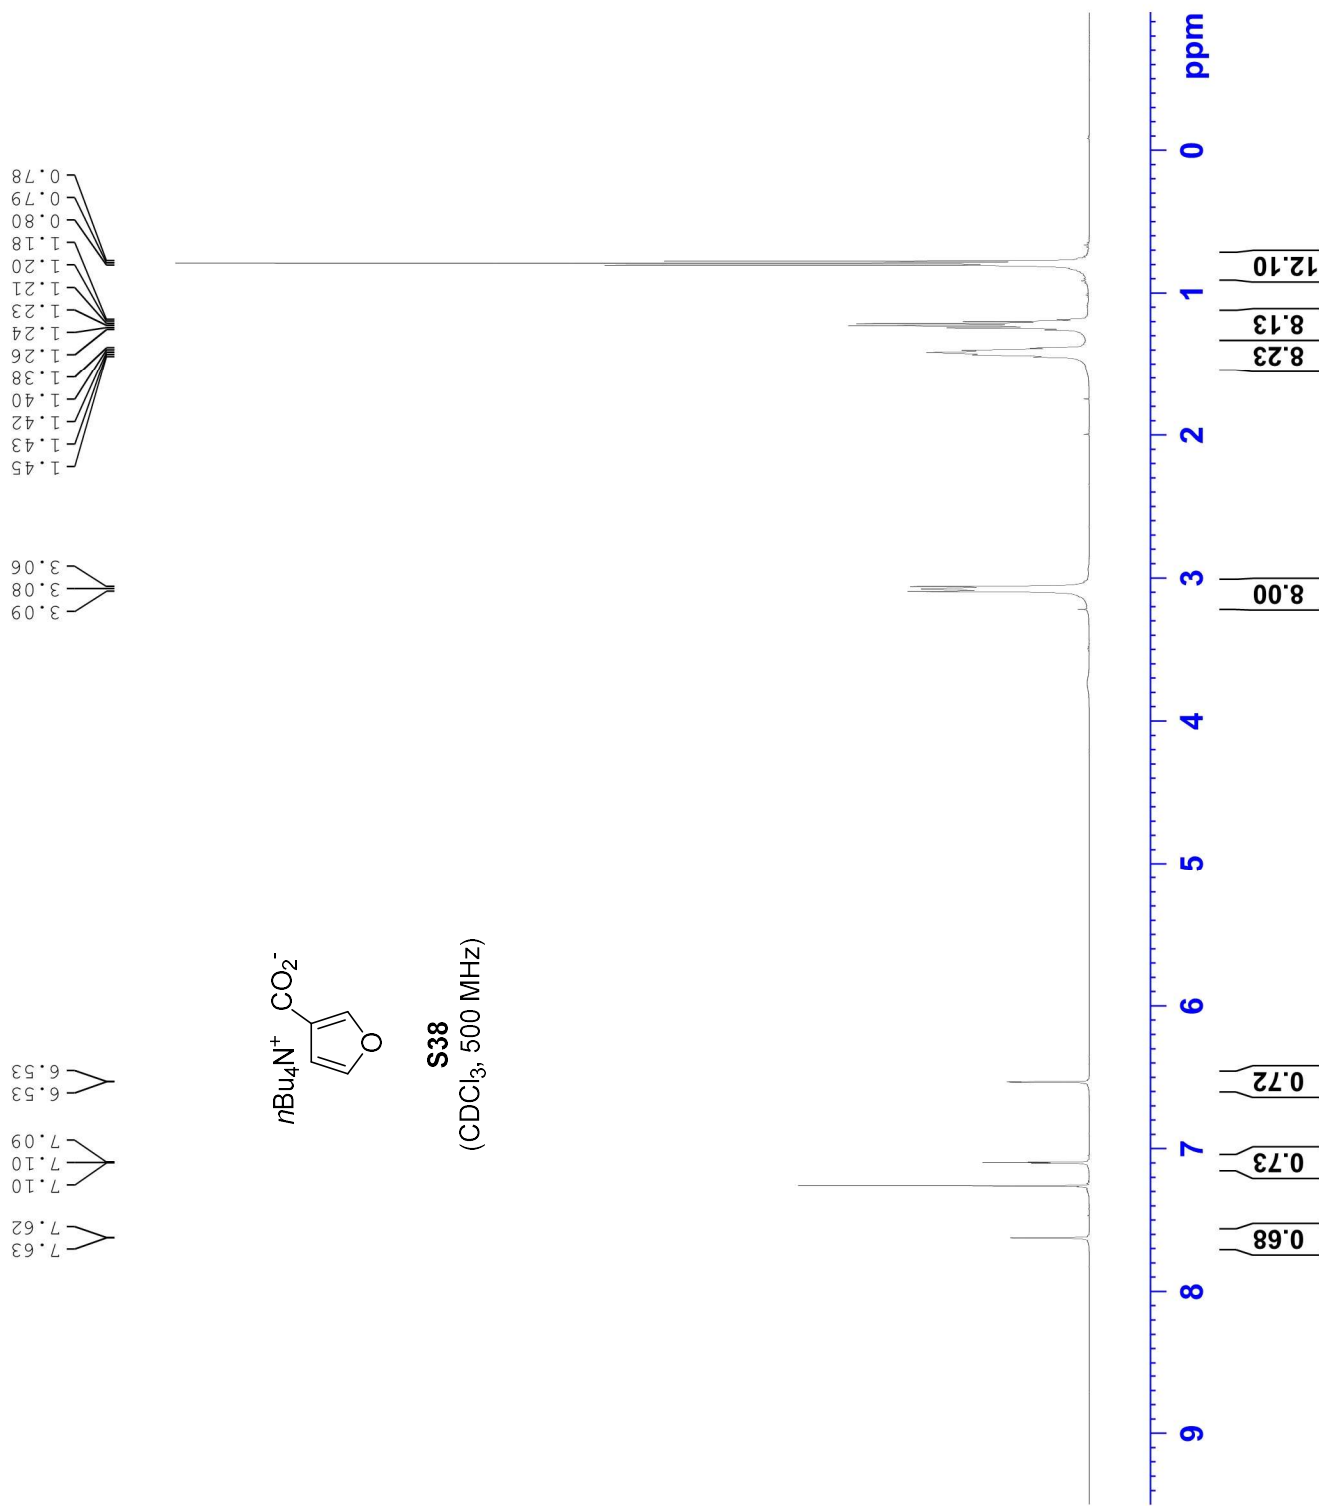

Current Data Parameters  
 NAME Yh-2-139  
 EXPNO 2  
 PROCNO 2

F2 - Acquisition Parameters

Date\_ 20180814  
 Time\_ 22.55  
 INSTRUM spect  
 PROBHD 5 mm PABBO BB/  
 PULPROG zgdc  
 TD 187496  
 SOLVENT CDC13  
 NS 4  
 DS 0  
 SWH 31250.000 Hz  
 FIDRES 0.166670 Hz  
 AQ 2.9999361 sec  
 RG 2050  
 DW 16.000 usec  
 DE 6.50 usec  
 TE 296.1 K  
 D1 3.00000000 sec  
 D11 0.03000000 sec  
 TD0 1

==== CHANNEL f1 =====  
 SF01 125.7049802 MHz  
 NUC1 13C  
 P1 10.00 usec  
 PLW1 72.83999634 W

==== CHANNEL f2 =====  
 SF02 499.8724993 MHz  
 NUC2 1H  
 CPDPRG[2] waltz16  
 PCPD2 80.00 usec  
 PLW2 19.00000000 W  
 PLW12 0.29688001 W

F2 - Processing parameters  
 SI 1048576  
 SF 125.6924115 MHz  
 WDW EM  
 SSB 0  
 LB 0.30 Hz  
 GB 0  
 PC 1.40

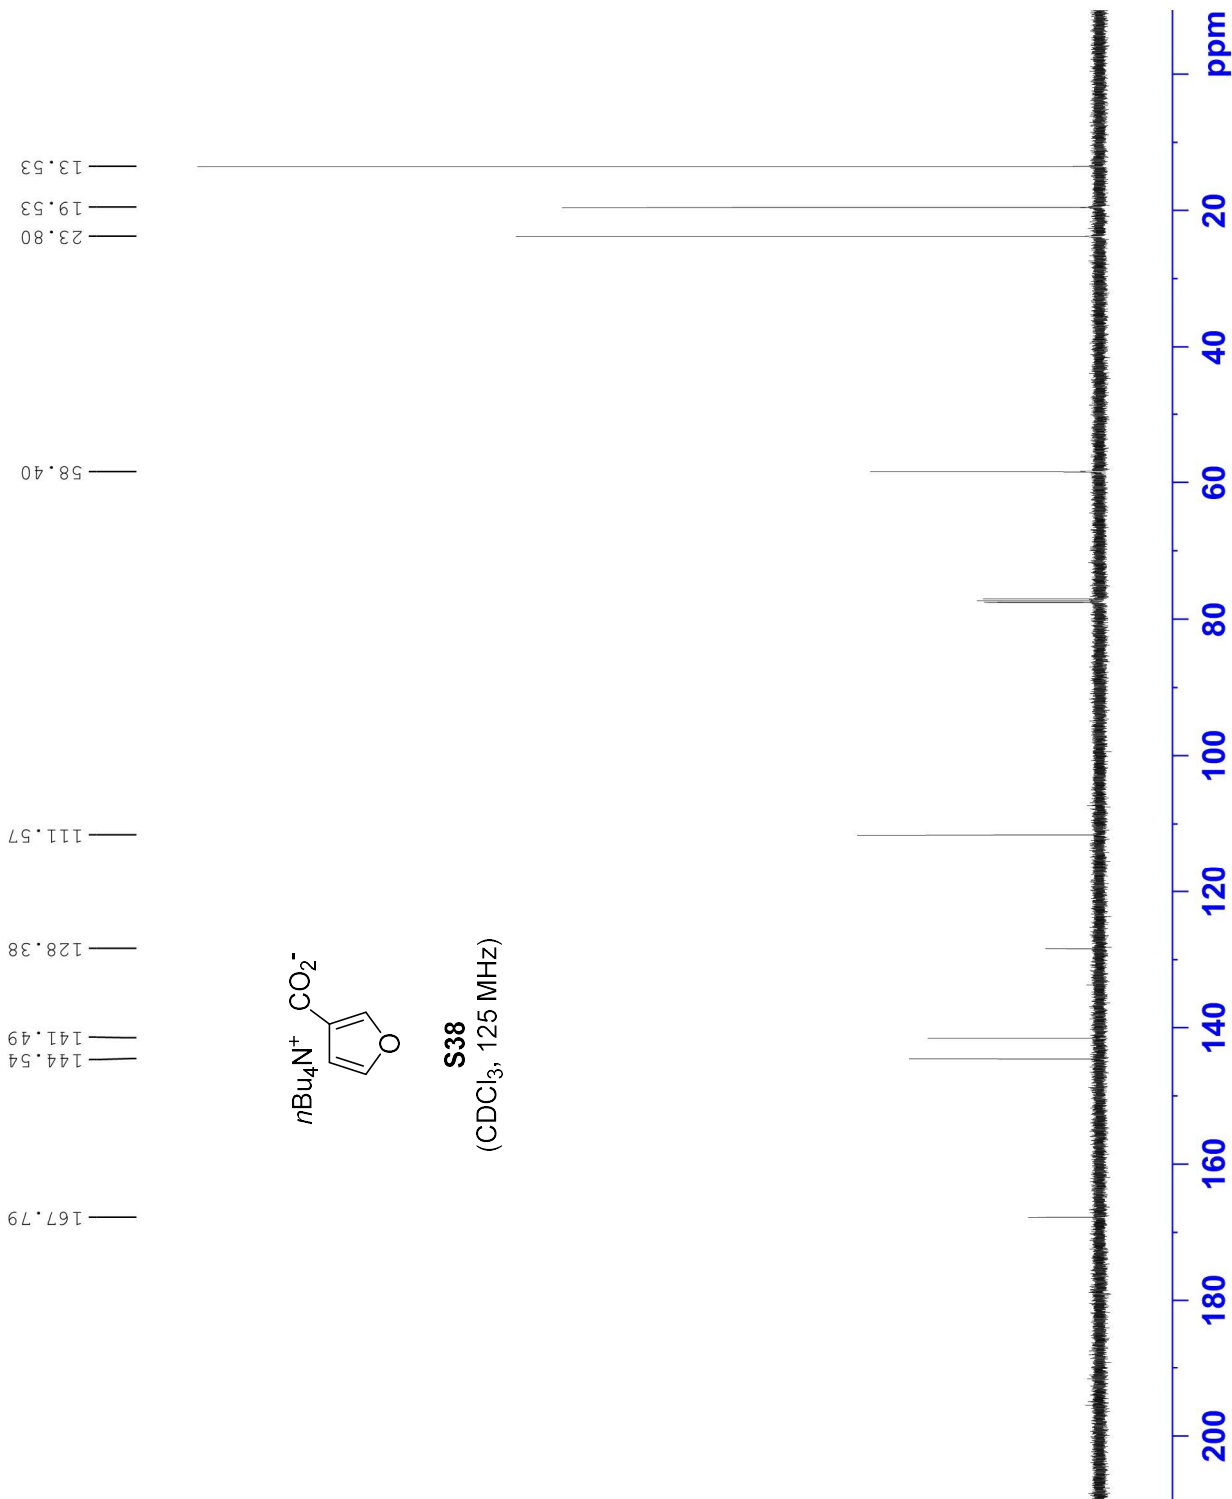

Current Data Parameters  
 NAME Yh-2-61-a  
 EXPNO 1  
 PROCNO 1

F2 - Acquisition Parameters  
 Date\_ 20180829  
 Time\_ 15.56  
 INSTRUM spect  
 PROBHD 5 mm PAQNP 1H/  
 PULPROG zg  
 TD 44998  
 SOLVENT CDC13  
 NS 2  
 DS 0  
 SWH 7500.000 Hz  
 FIDRES 0.166674 Hz  
 AQ 2.9998667 sec  
 RG 22.6  
 DW 66.667 usec  
 DE 71.43 usec  
 TE 295.2 K  
 D1 3.0000000 sec  
 TD0 1

==== CHANNEL f1 =====  
 NUC1 1H  
 P1 14.50 usec  
 PL1 0 dB  
 PL1W 24.54113007 W  
 SFO1 500.1330008 MHz

F2 - Processing parameters  
 SI 32768  
 SF 500.1300156 MHz  
 WDW EM  
 SSB 0  
 LB 0.30 Hz  
 GB 0  
 PC 1.00

3.11  
3.10  
3.09  
3.08  
1.51  
1.49  
1.48  
1.47  
1.47  
1.46  
1.44  
1.31  
1.30  
1.28  
1.27  
1.25  
1.24  
0.87  
0.86  
0.84

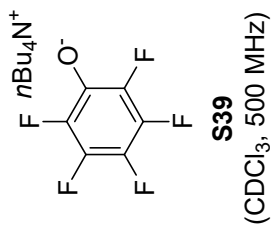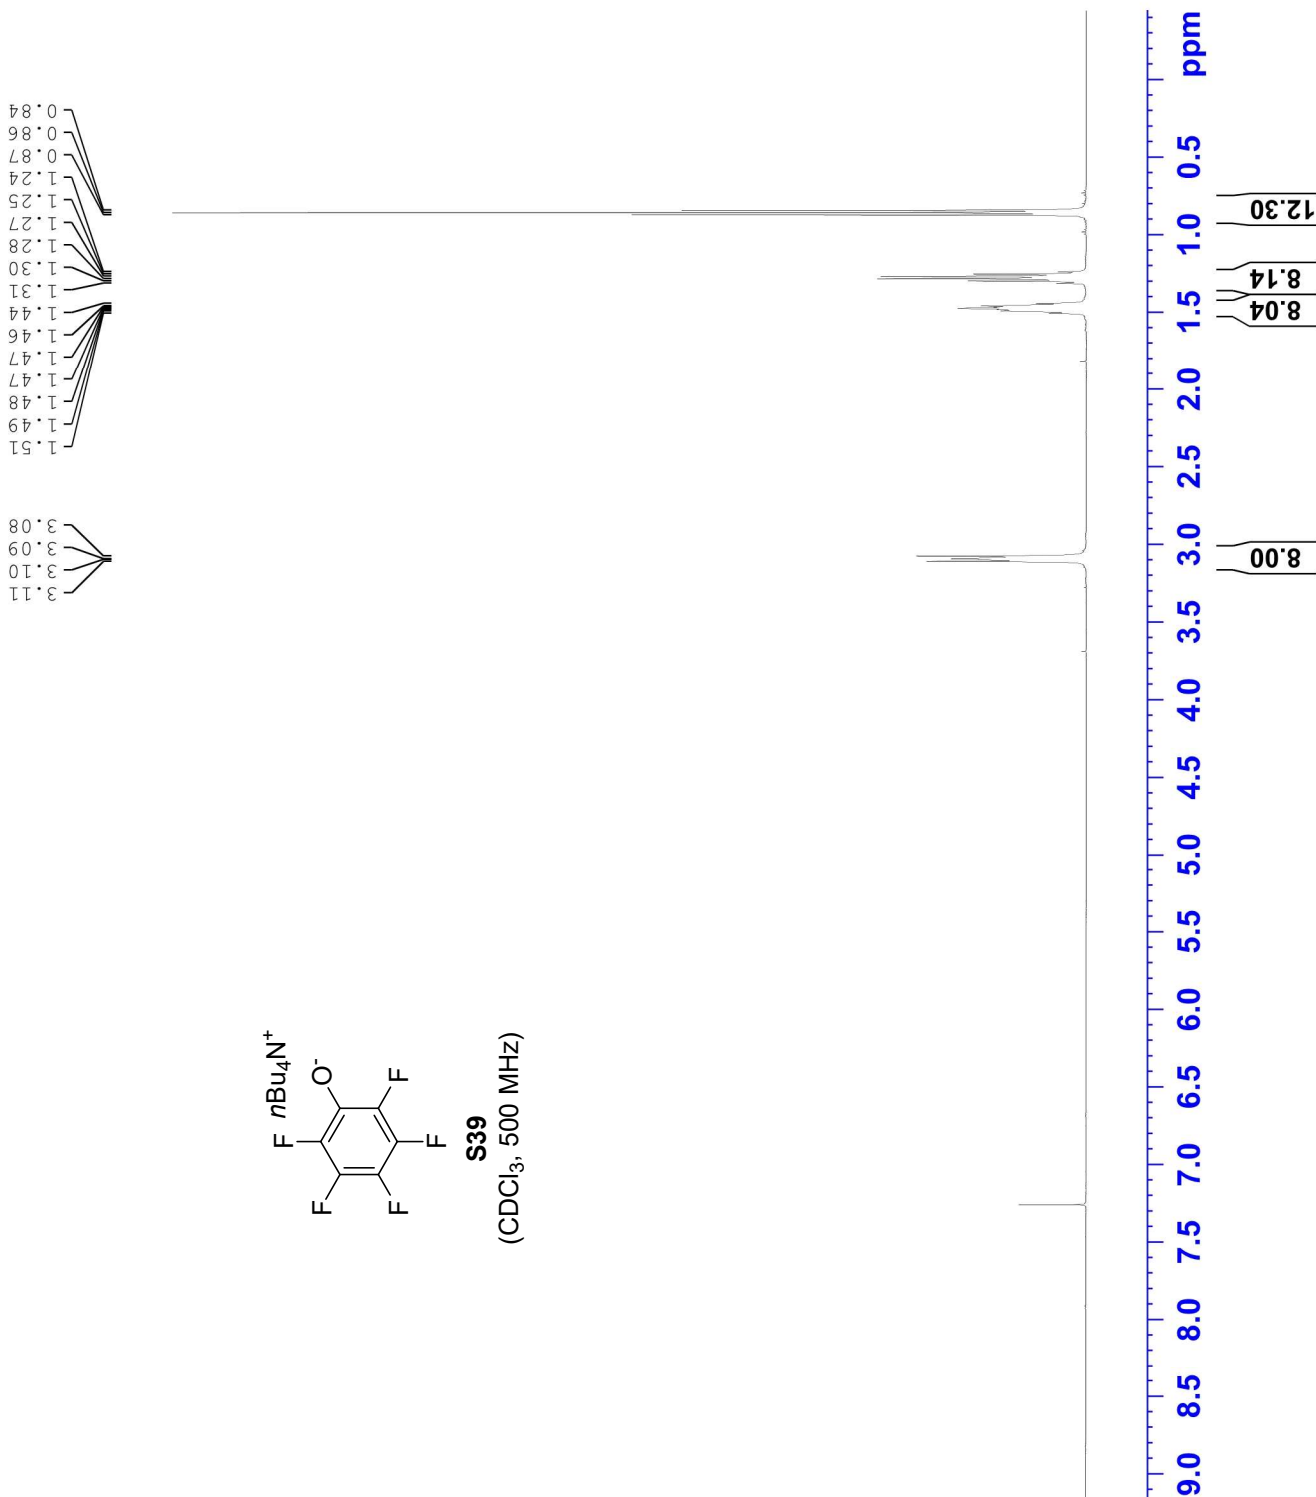

147.28  
142.22  
140.39  
139.83  
139.77  
138.02  
137.98  
137.93  
137.88  
127.00

58.55  
23.76  
19.53  
13.43

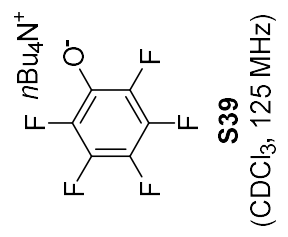

Current Data Parameters  
 NAME yh-2-61-a  
 EXPNO 2  
 PROCNO 2

F2 - Acquisition Parameters  
 Date\_ 20180829  
 Time 16.23  
 INSTRUM spect  
 PROBHD 5 mm PAQNP 1H/  
 PULPROG zgpg  
 TD 197364  
 SOLVENT CDC13  
 NS 100  
 DS 0  
 SWH 32894.738 Hz  
 FIDRES 0.166670 Hz  
 AQ 2.9999328 sec  
 RG 2050  
 DW 15.200 usec  
 DE 6.00 usec  
 TE 296.0 K  
 D1 10.00000000 sec  
 D11 0.03000000 sec  
 TD0 1

==== CHANNEL f1 =====  
 NUC1 13C  
 P1 9.90 usec  
 PL1 1.00 dB  
 PL1W 72.42802429 W  
 SF01 125.7716224 MHz

==== CHANNEL f2 =====  
 CPDPRG[2] waltz16  
 NUC2 1H  
 PCPD2 80.00 usec  
 PL2 0 dB  
 PL12 16.50 dB  
 PL13 17.00 dB  
 PL2W 24.54113007 W  
 PL12W 0.54940748 W  
 PL13W 0.48965994 W  
 SFO2 500.1325006 MHz

F2 - Processing parameters  
 SI 131072  
 SF 125.7577890 MHz  
 WDW EM  
 SSB 0  
 LB 0.30 Hz  
 GB 0  
 PC 1.40

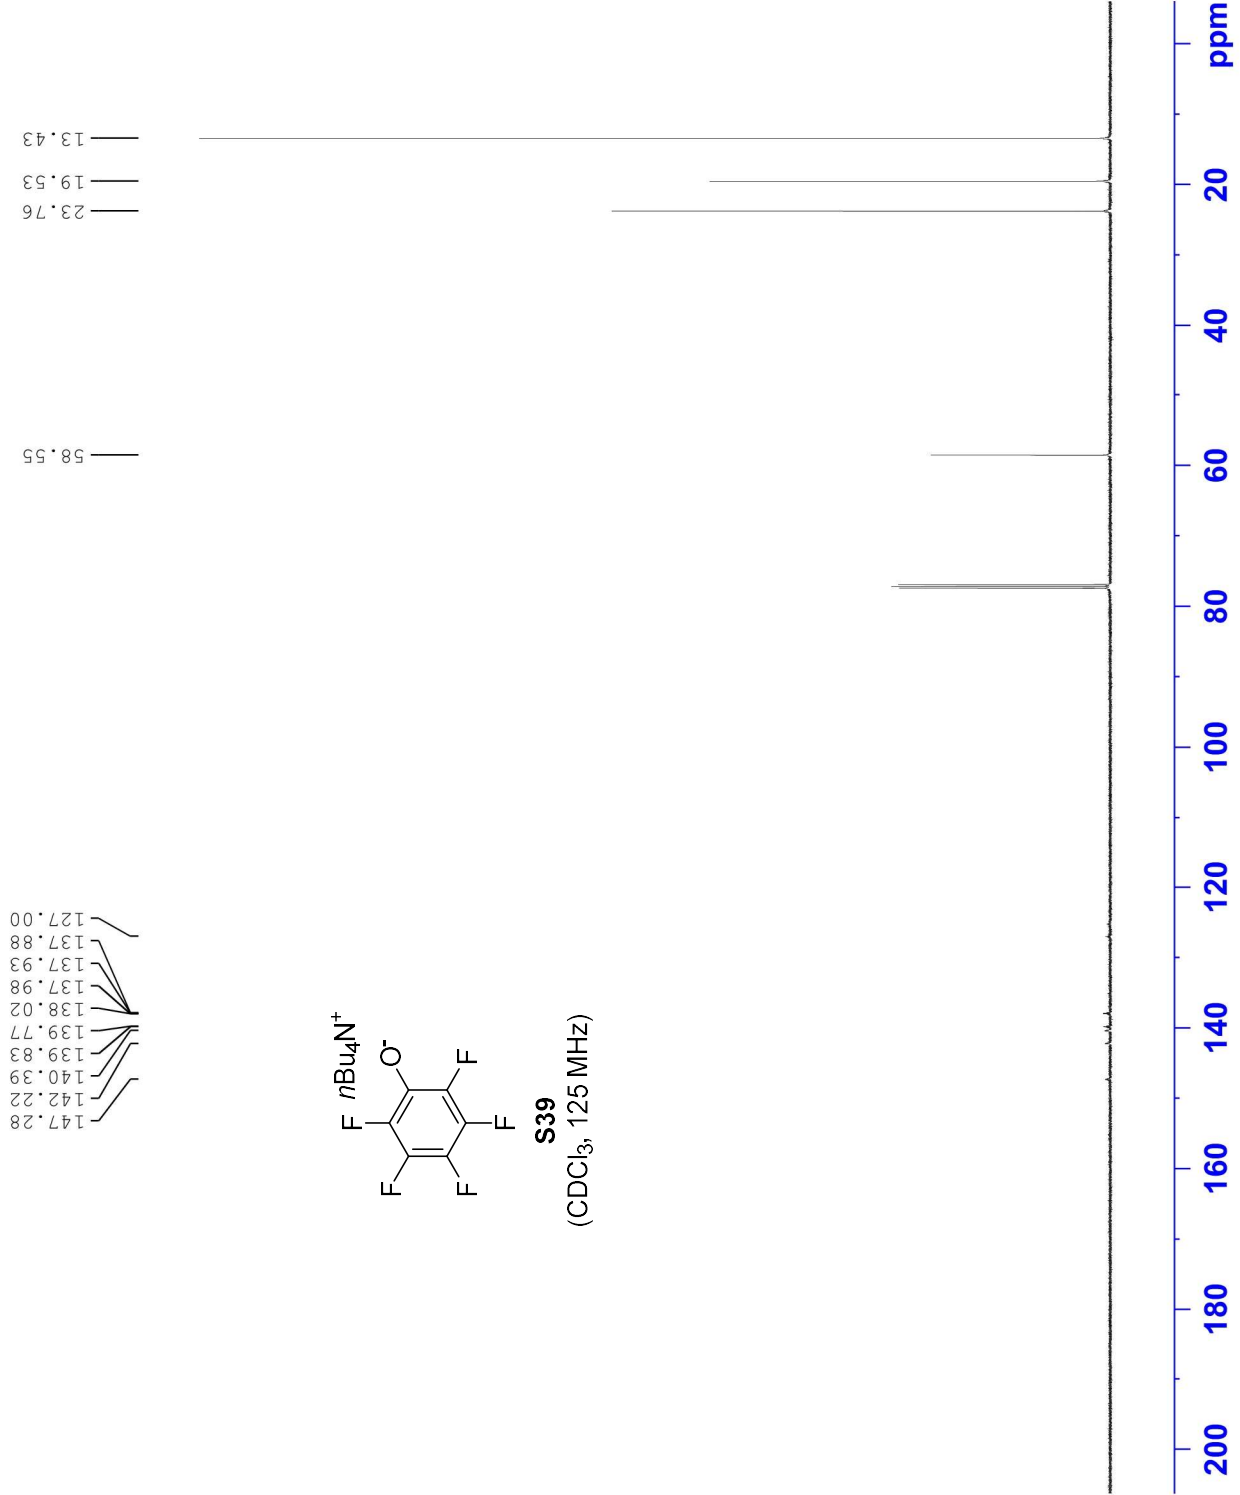



Current Data Parameters  
 NAME HOBt salt  
 EXPNO 2  
 PROCNO 2

F2 - Acquisition Parameters

Date\_ 20190930  
 Time\_ 16.46  
 INSTRUM spect  
 PROBHD 5 mm PABBO BB/  
 PULPROG zgdc  
 TD 187496  
 SOLVENT CDC13  
 NS 151  
 DS 0  
 SWH 31250.000 Hz  
 FIDRES 0.166670 Hz  
 AQ 2.9999361 sec  
 RG 2050  
 DW 16.000 usec  
 DE 6.50 usec  
 TE 298.0 K  
 D1 3.00000000 sec  
 D11 0.03000000 sec  
 TD0 1

==== CHANNEL f1 =====  
 SFO1 125.7049802 MHz  
 NUC1 13C  
 P1 10.00 usec  
 PLW1 72.83999634 W

==== CHANNEL f2 =====  
 SFO2 499.8724993 MHz  
 NUC2 1H  
 CPDPRG[2] waltz16  
 PCPD2 80.00 usec  
 PLW2 19.00000000 W  
 PLW12 0.29688001 W

F2 - Processing parameters  
 SI 1048576  
 SF 125.6924115 MHz  
 WDW EM  
 SSB 0  
 LB 0.30 Hz  
 GB 0  
 PC 1.40

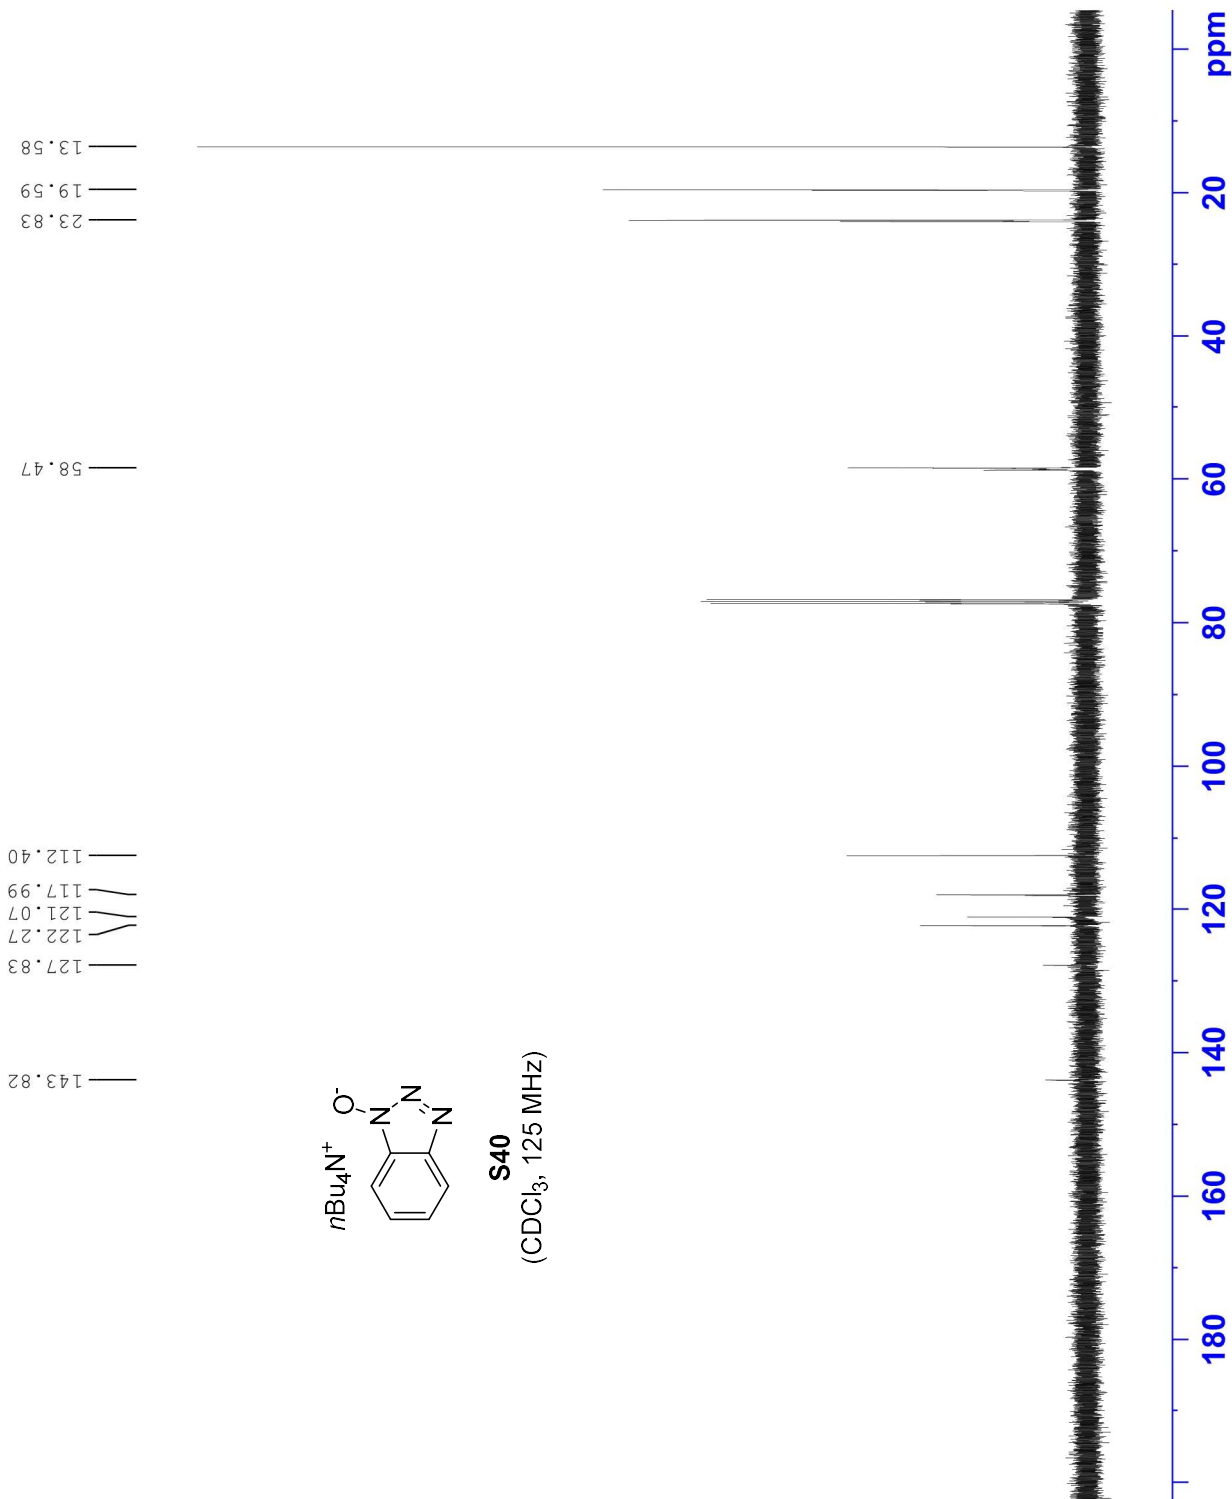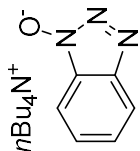

**S40**  
 (CDCl<sub>3</sub>, 125 MHz)



Current Data Parameters  
 NAME acetate product  
 EXPNO 1  
 PROCNO 1

F2 - Acquisition Parameters

Date\_ 20180820  
 Time\_ 15.39  
 INSTRUM spect  
 PROBHD 5 mm PABBO BB/  
 PULPROG zg  
 TD 59998  
 SOLVENT CDC13  
 NS 2  
 DS 0  
 SWH 10000.000 Hz  
 FIDRES 0.166672 Hz  
 AQ 2.9999001 sec  
 RG 77.07  
 DW 50.000 usec  
 DE 6.50 usec  
 TE 296.0 K  
 D1 4.0000000 sec  
 TD0 1

==== CHANNEL f1 =====  
 SFO1 499.8730869 MHz  
 NUC1 1H  
 P1 3.58 usec  
 PLW1 18.25000000 W

F2 - Processing parameters  
 SI 65536  
 SF 499.8700122 MHz  
 EM  
 WDW 0  
 SSB 0.30 Hz  
 LB 0  
 GB 0  
 PC 1.00

4.03  
4.01  
3.98  
3.95  
3.65  
2.26  
2.25  
2.23  
2.22  
2.22  
2.22  
2.19  
2.19  
2.17  
2.17  
2.06  
1.56  
1.54  
1.53  
1.52  
1.51  
1.51  
1.50  
1.49  
1.47  
1.47  
1.46  
1.45  
1.45  
1.44  
1.44  
1.43  
1.42  
1.34  
1.32  
1.30  
1.30

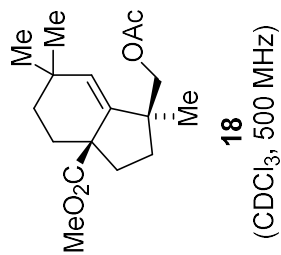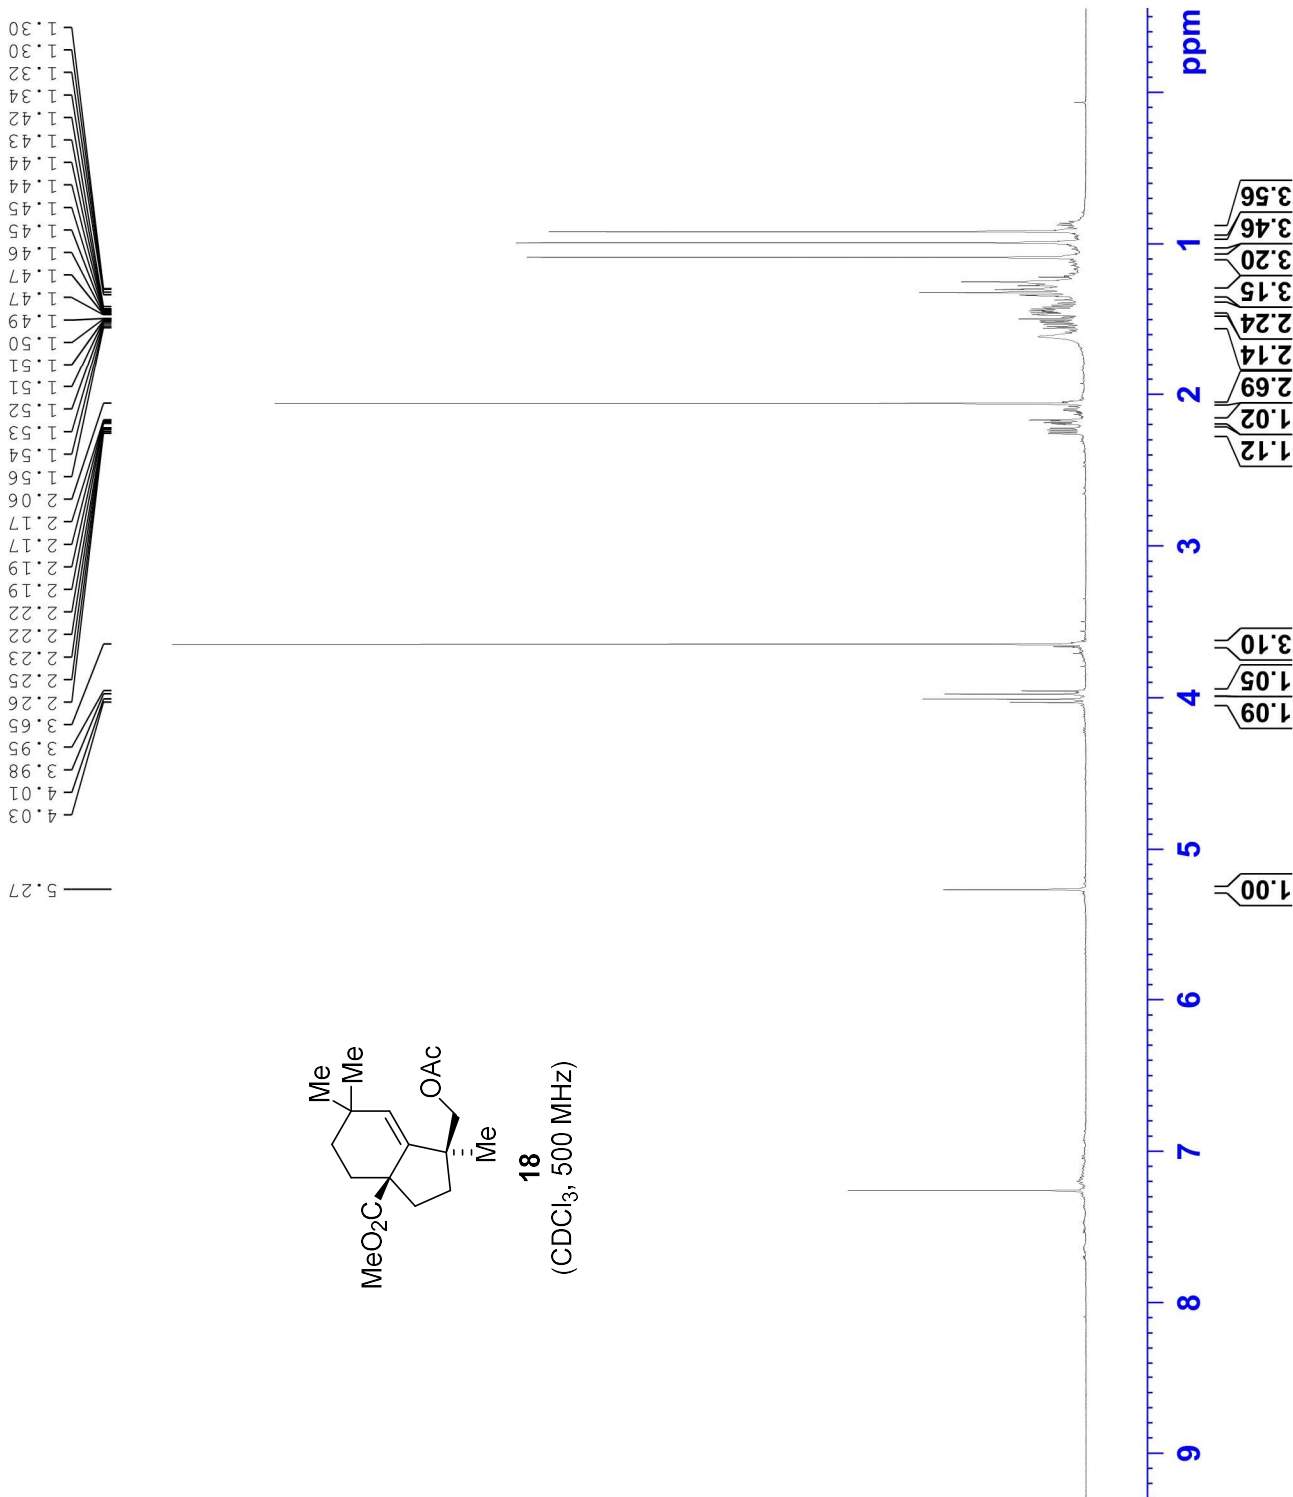

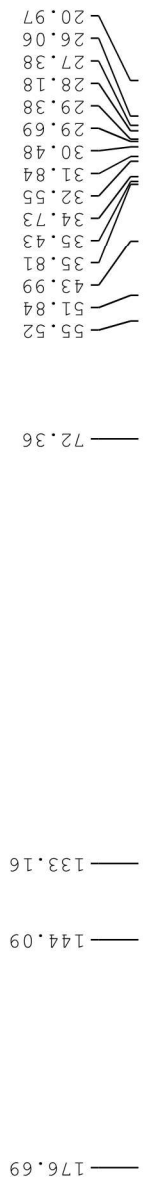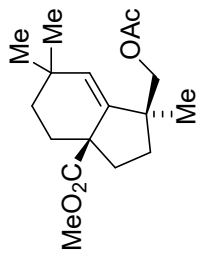

**18**  
(CDCl<sub>3</sub>, 125 MHz)

Current Data Parameters  
 NAME acetate product  
 EXPNO 2  
 PROCNO 2

F2 - Acquisition Parameters  
 Date\_ 20180820  
 Time\_ 15.59  
 INSTRUM spect  
 PROBHD 5 mm PABBO BB/  
 PULPROG zgdc  
 TD 187496  
 SOLVENT CDCl3  
 NS 159  
 DS 0  
 SWH 31250.000 Hz  
 FIDRES 0.166670 Hz  
 AQ 2.9999361 sec  
 RG 2050  
 DW 16.000 usec  
 DE 6.50 usec  
 TE 297.3 K  
 D1 3.0000000 sec  
 D11 0.0300000 sec  
 TD0 1

==== CHANNEL f1 =====  
 SFO1 125.7049802 MHz  
 NUC1 13C  
 P1 10.00 usec  
 PLW1 72.83999634 W

==== CHANNEL f2 =====  
 SFO2 499.8724993 MHz  
 NUC2 1H  
 CPDPRG[2] waltz16  
 PCPD2 80.00 usec  
 PLW2 19.00000000 W  
 PLW12 0.29688001 W

F2 - Processing parameters  
 SI 1048576  
 SF 125.6924115 MHz  
 EM  
 WDW 0  
 SSB 0  
 LB 0.30 Hz  
 GB 0  
 PC 1.40

Current Data Parameters  
 NAME yh-7-35-b  
 EXPNO 1  
 PROCNO 1

F2 - Acquisition Parameters

Date\_ 20191005  
 Time\_ 15.10 h  
 INSTRUM spect  
 PROBHD Z113652\_0187 (  
 PULPROG zg  
 TD 59998  
 SOLVENT CDC13  
 NS 4  
 DS 0  
 SWH 10000.000 Hz  
 FIDRES 0.333344 Hz  
 AQ 2.9999001 sec  
 RG 37.92  
 DW 50.000 usec  
 DE 6.50 usec  
 TE 296.0 K  
 D1 3.0000000 sec  
 TD0 1  
 SFO1 499.8730869 MHz  
 NUC1 <sup>1</sup>H  
 P1 10.75 usec  
 PLW1 18.2500000 W

F2 - Processing parameters

SI 65536  
 SF 499.8700125 MHz  
 EM  
 WDW 0  
 SSB 0  
 LB 0.30 Hz  
 GB 0  
 PC 1.00

8.07  
8.06  
8.05  
8.05  
7.57  
7.57  
7.57  
7.55  
7.55  
7.54  
7.54  
7.54  
7.46  
7.44  
7.43  
5.36  
5.36  
4.27  
4.25  
4.24  
4.22  
3.65  
2.30  
2.29  
2.29  
2.28  
2.28  
2.27  
2.23  
2.22  
2.22  
2.20  
2.20  
1.71  
1.70  
1.68  
1.67  
1.66  
1.64  
1.62  
1.62  
1.61  
1.61  
1.60  
1.59  
1.58  
1.58  
1.51  
1.50  
1.49  
1.47  
1.46  
1.46  
1.45  
1.40  
1.38  
1.37  
1.37  
1.35  
1.34  
1.34  
1.32  
1.20  
1.00  
0.94

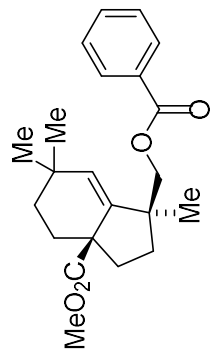

19  
 (CDCl<sub>3</sub>, 500 MHz)

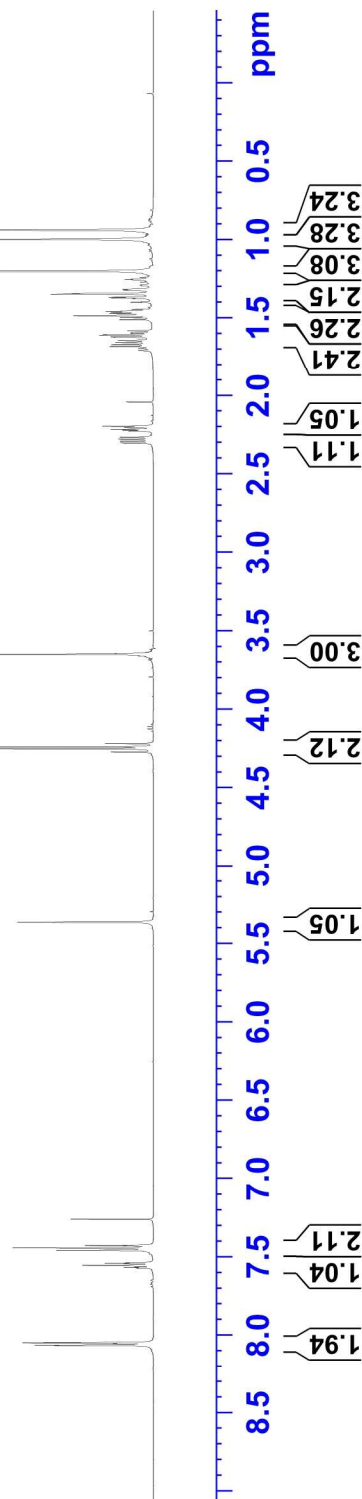

Current Data Parameters  
 NAME Yh-7-35-b  
 EXPNO 2  
 PROCNO 1

F2 - Acquisition Parameters  
 Date\_ 20191005  
 Time\_ 15.28 h

INSTRUM spect  
 PROBHD Z113652\_0187 (  
 PULPROG zgdc  
 TD 187496  
 SOLVENT CDC13  
 NS 56  
 DS 0

SWH 31250.000 Hz  
 FIDRES 0.333340 Hz  
 AQ 2.9999361 sec  
 RG 2050  
 DW 16.000 usec  
 DE 6.50 usec  
 TE 296.7 K

D1 3.0000000 sec  
 D11 0.0300000 sec  
 TD0 1  
 SF01 125.7049802 MHz  
 NUC1 13C

P1 10.00 usec  
 PLW1 72.83999634 W  
 SF02 499.8724993 MHz  
 NUC2 1H  
 CPDPRG12 waltz16  
 PCPD2 80.00 usec  
 PLW2 19.0000000 W  
 PLW12 0.29688001 W

F2 - Processing parameters  
 SI 1048576  
 SF 125.6924115 MHz  
 WDW EM  
 SSB 0  
 LB 0.30 Hz  
 GB 0  
 PC 1.40

176.77  
 166.69  
 144.03  
 133.36  
 132.74  
 130.72  
 129.56  
 128.32  
 72.71  
 55.54  
 51.90  
 44.39  
 35.85  
 35.57  
 34.76  
 32.60  
 31.88  
 30.49  
 29.38  
 26.24

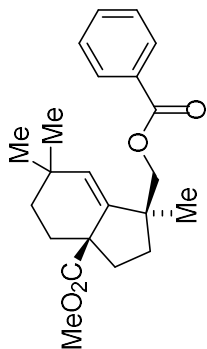

**19**  
 (CDCl<sub>3</sub>, 125 MHz)

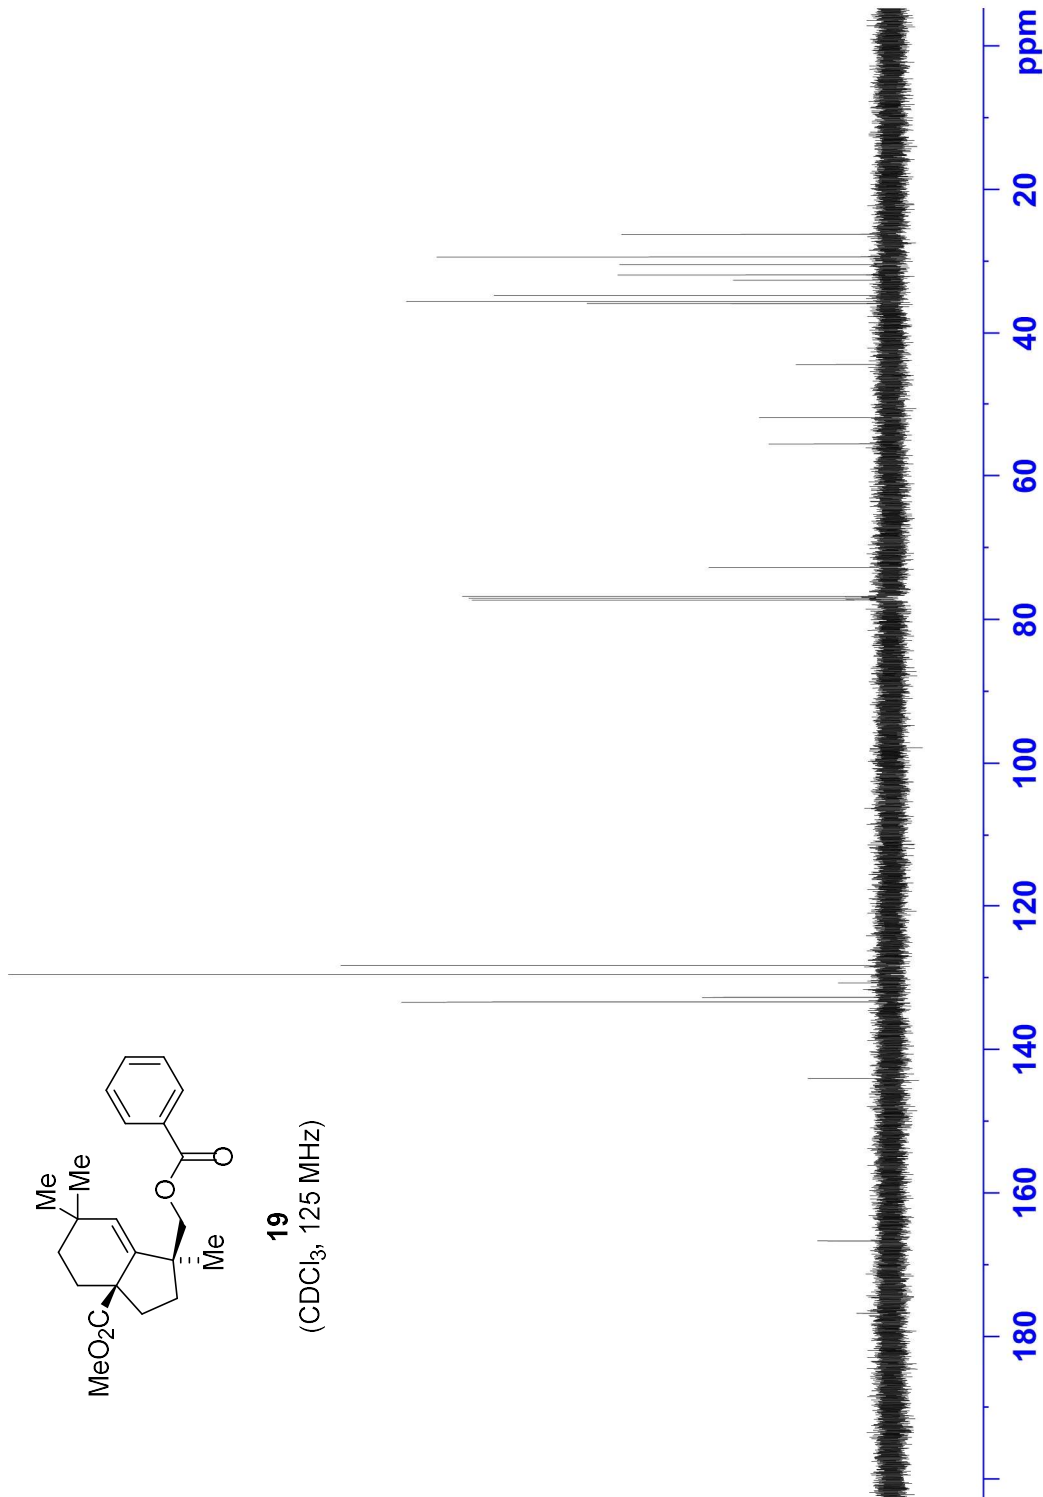

Current Data Parameters  
 NAME Yh-2-42-a  
 EXPNO 1  
 PROCNO 1

F2 - Acquisition Parameters

Date\_ 20171226  
 Time\_ 21.24  
 INSTRUM spect  
 PROBHD 5 mm PABBO BB/  
 PULPROG zg  
 TD 59998  
 SOLVENT CDC13  
 NS 4  
 DS 0  
 SWH 10000.000 Hz  
 FIDRES 0.166672 Hz  
 AQ 2.9999001 sec  
 RG 28.76  
 DW 50.000 usec  
 DE 6.50 usec  
 TE 296.0 K  
 D1 3.0000000 sec  
 TD0 1

==== CHANNEL f1 =====  
 SFO1 499.8730869 MHz  
 NUC1 1H  
 P1 10.75 usec  
 PLW1 18.25000000 W

F2 - Processing parameters  
 SI 65536  
 SF 499.8700123 MHz  
 EM  
 WDW 0  
 SSB 0  
 LB 0.30 Hz  
 GB 0  
 PC 1.00

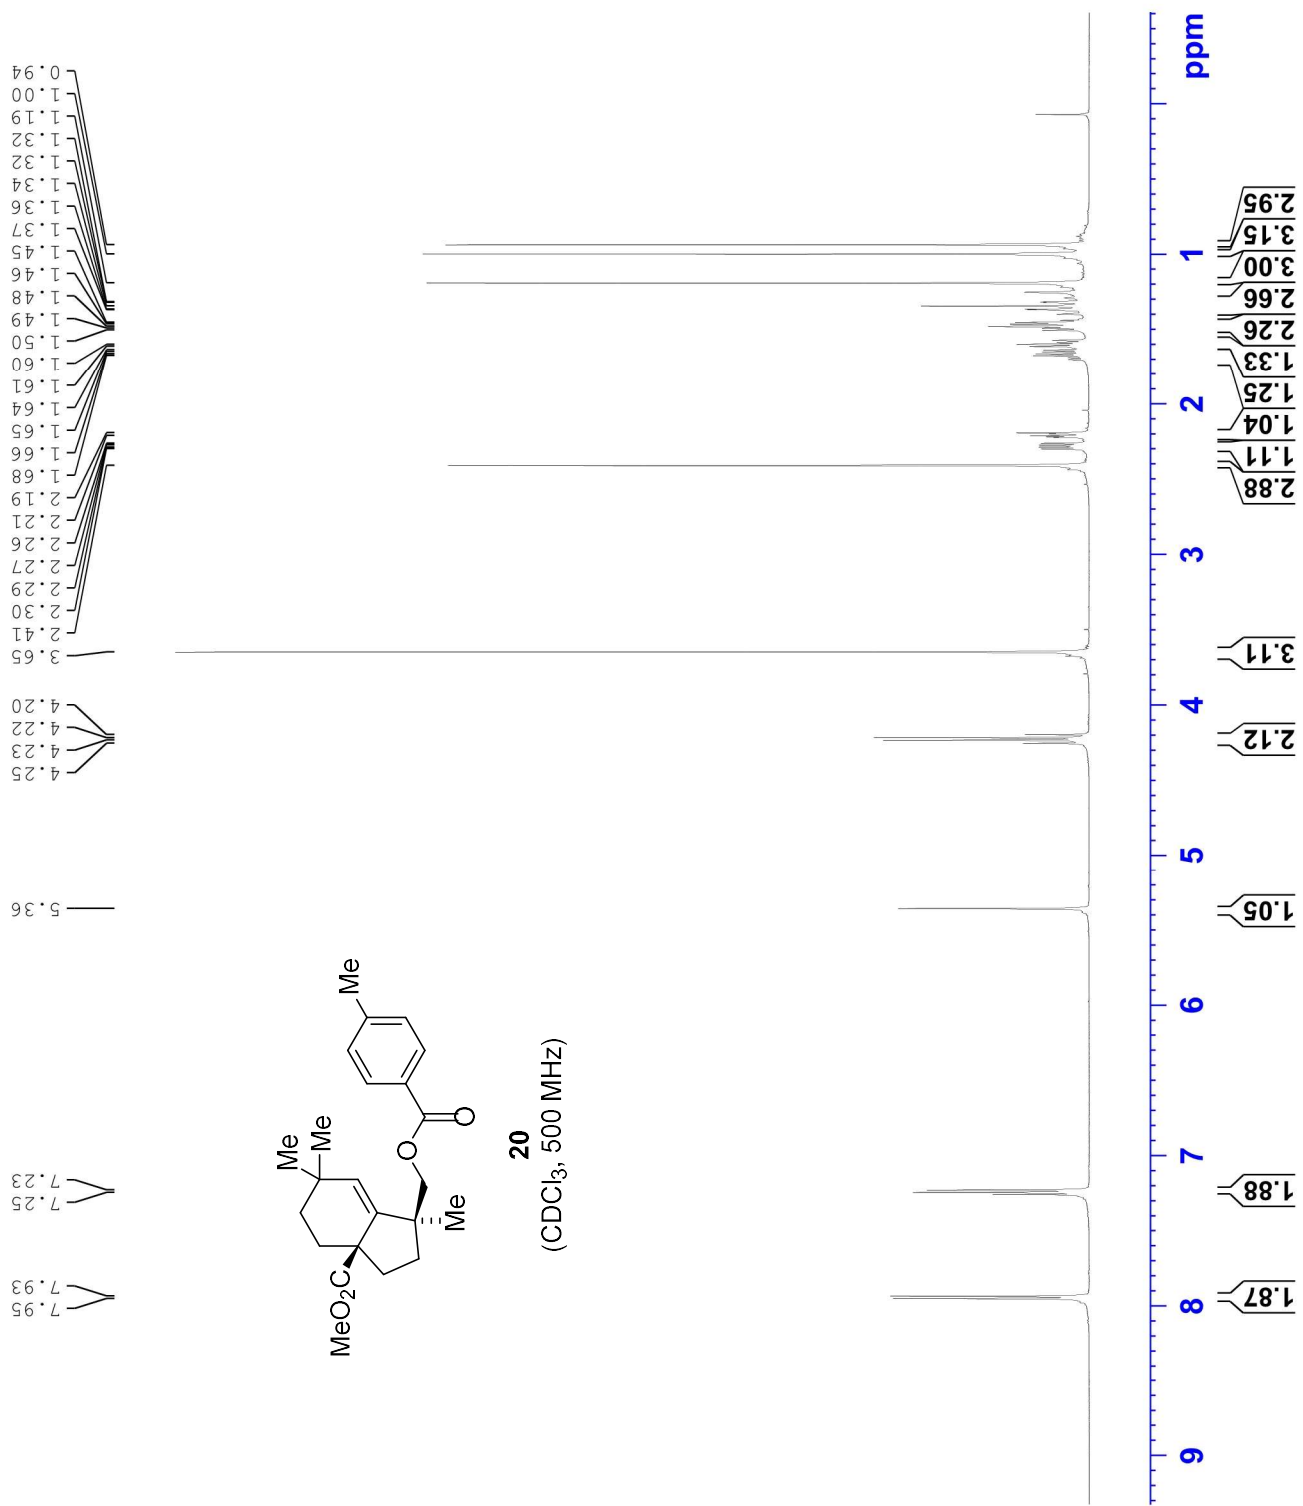

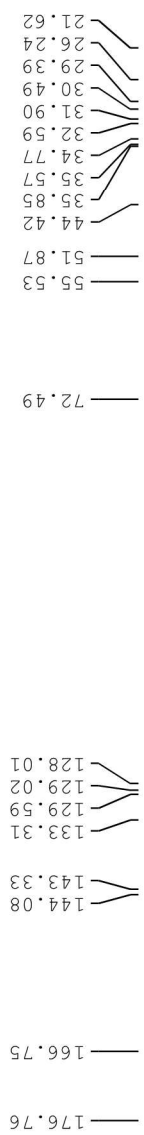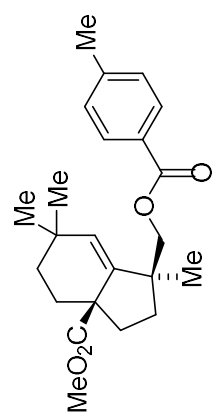

**20**  
(CDCl<sub>3</sub>, 125 MHz)

Current Data Parameters  
 NAME Yh-2-42-a  
 EXPNO 2  
 PROCNO 2

F2 - Acquisition Parameters  
 Date\_ 20171226  
 Time\_ 22.26  
 INSTRUM spect  
 PROBHD 5 mm PABBO BB/  
 PULPROG zgdc  
 TD 187496  
 SOLVENT CDC13  
 NS 482  
 DS 0  
 SWH 31250.000 Hz  
 FIDRES 0.166670 Hz  
 AQ 2.9999361 sec  
 RG 2050  
 DW 16.000 usec  
 DE 6.50 usec  
 TE 297.7 K  
 D1 3.0000000 sec  
 D11 0.0300000 sec  
 TD0 1

==== CHANNEL f1 =====  
 SFO1 125.7049802 MHz  
 NUC1 13C  
 P1 10.00 usec  
 PLW1 72.83999634 W

==== CHANNEL f2 =====  
 SFO2 499.8724993 MHz  
 NUC2 1H  
 CPDPRG[2] waltz16  
 PCPD2 80.00 usec  
 PLW2 19.00000000 W  
 PLW12 0.29688001 W

F2 - Processing parameters  
 SI 1048576  
 SF 125.6924115 MHz  
 WDW EM  
 SSB 0  
 LB 0.30 Hz  
 GB 0  
 PC 1.40

Current Data Parameters  
 NAME yh-2-31-1-f  
 EXPNO 1  
 PROCNO 1

F2 - Acquisition Parameters

Date\_ 20171114  
 Time\_ 17.29  
 INSTRUM spect  
 PROBHD 5 mm PATXI 1H/  
 PULPROG zg  
 TD 59998  
 SOLVENT CDC13  
 NS 8  
 DS 0  
 SWH 10000.000 Hz  
 FIDRES 0.166672 Hz  
 AQ 2.9999001 sec  
 RG 79.04  
 DW 50.000 usec  
 DE 10.00 usec  
 TE 294.6 K  
 D1 2.0000000 sec  
 TD0 1

==== CHANNEL f1 =====  
 SFO1 500.1330885 MHz  
 NUC1 1H  
 P1 8.00 usec  
 PLW1 12.19999981 W

F2 - Processing parameters  
 SI 65536  
 SF 500.1300132 MHz  
 EM  
 WDW 0  
 SSB 0  
 LB 0.30 Hz  
 GB 0  
 PC 1.00

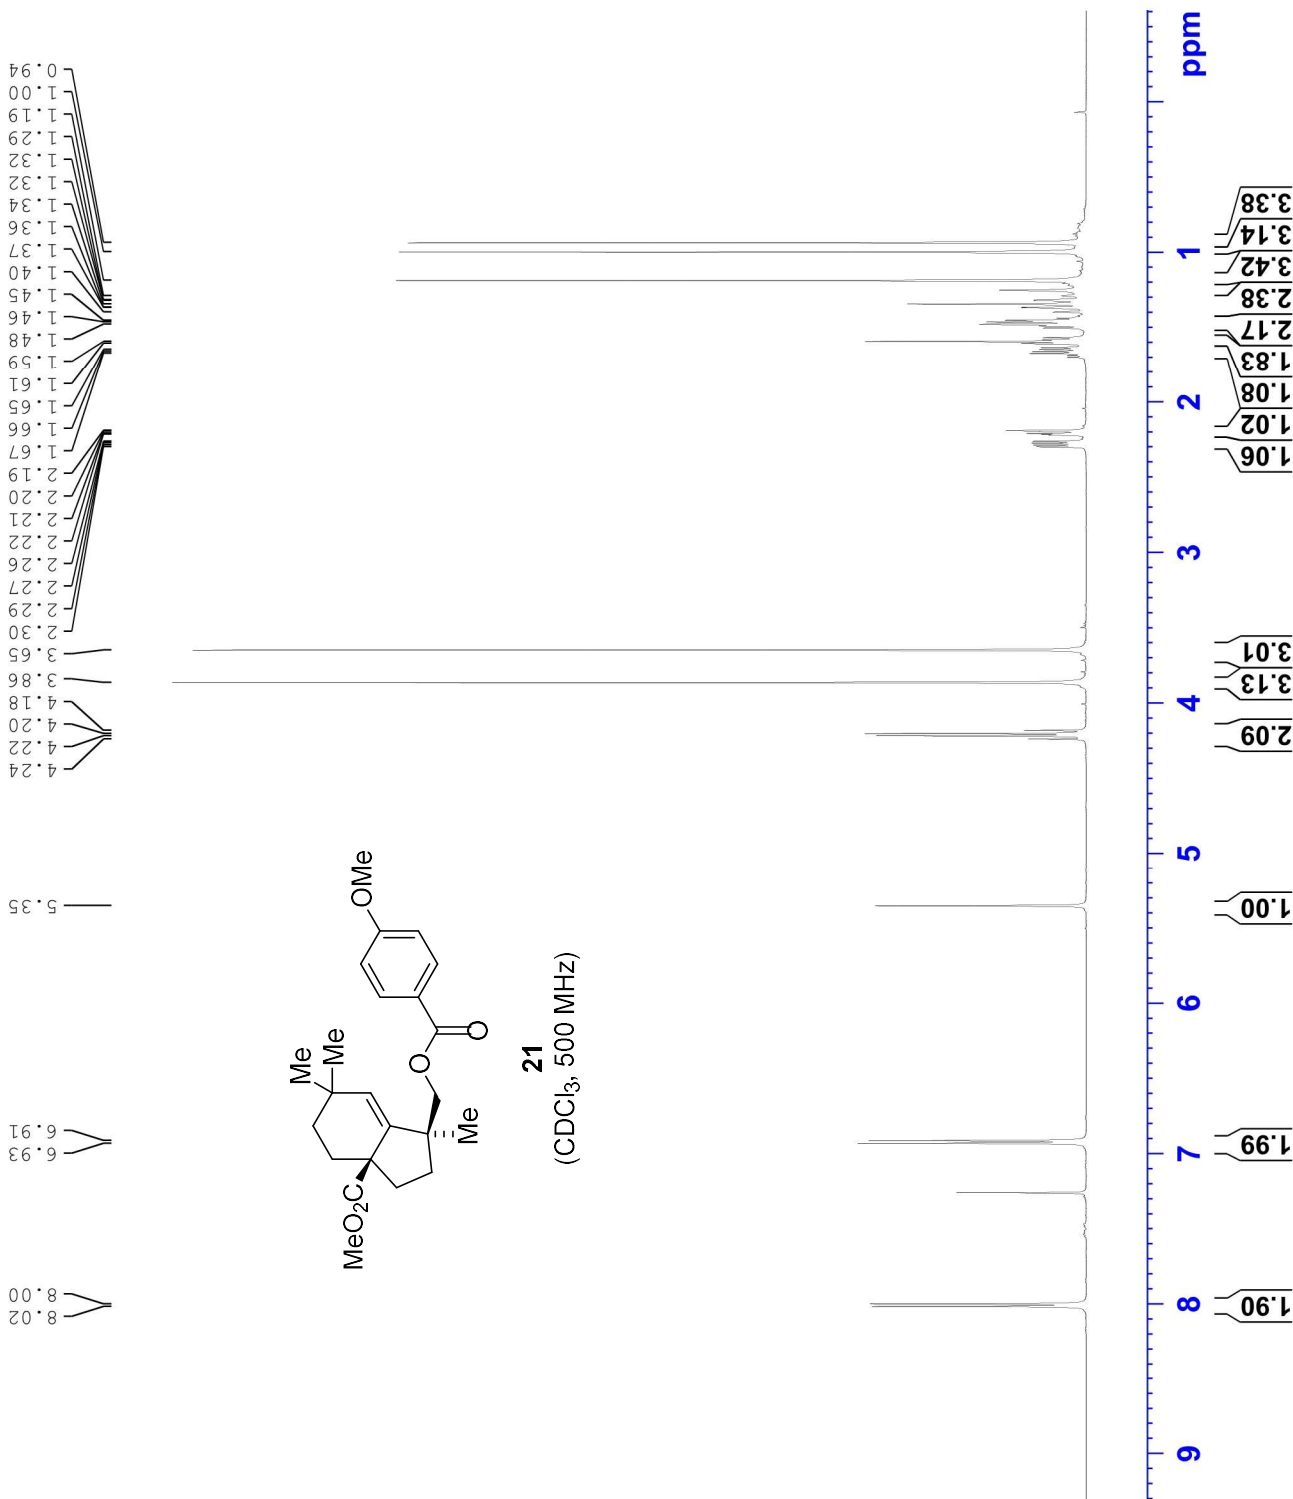

26.24  
 29.39  
 30.49  
 31.91  
 32.58  
 34.76  
 35.57  
 35.89  
 44.43  
 51.86  
 55.40  
 55.52  
 72.39  
 113.57  
 123.20  
 131.54  
 133.28  
 144.11  
 163.25  
 166.44  
 176.76

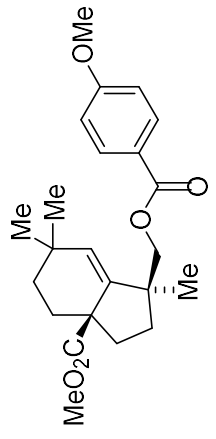

**21**  
 (CDCl<sub>3</sub>, 125 MHz)

Current Data Parameters  
 NAME Yh-2-31-f  
 EXPNO 2  
 PROCNO 2  
 F2 - Acquisition Parameters  
 Date\_ 20171122  
 Time\_ 21.57  
 INSTRUM spect  
 PROBHD 5 mm PABBO BB/  
 PULPROG zgdc  
 TD 187496  
 SOLVENT CDCl3  
 NS 559  
 DS 0  
 SWH 31250.000 Hz  
 FIDRES 0.166670 Hz  
 AQ 2.9999361 sec  
 RG 2050  
 DW 16.000 usec  
 DE 6.50 usec  
 TE 298.8 K  
 D1 3.00000000 sec  
 D11 0.03000000 sec  
 TD0 1  
 ===== CHANNEL f1 =====  
 SFO1 125.7049802 MHz  
 NUC1 13C  
 P1 10.00 usec  
 PLW1 72.83999634 W  
 ===== CHANNEL f2 =====  
 SFO2 499.8724993 MHz  
 NUC2 1H  
 CPDPRG[2] waltz16  
 PCPD2 80.00 usec  
 PLW2 19.00000000 W  
 PLW12 0.29688001 W  
 F2 - Processing parameters  
 SI 1048576  
 SF 125.6924115 MHz  
 WDW EM  
 SSB 0  
 LB 0.30 Hz  
 GB 0  
 PC 1.40

ppm



Current Data Parameters  
 NAME Yh-2-62-a  
 EXPNO 1  
 PROCNO 1

F2 - Acquisition Parameters

Date\_ 20180104  
 Time\_ 22.12  
 INSTRUM spect  
 PROBHD 5 mm PABBO BB/  
 PULPROG zg  
 TD 59998  
 SOLVENT CDC13  
 NS 2  
 DS 0  
 SWH 10000.000 Hz  
 FIDRES 0.166672 Hz  
 AQ 2.9999001 sec  
 RG 37.92  
 DW 50.000 usec  
 DE 6.50 usec  
 TE 296.0 K  
 D1 3.0000000 sec  
 TD0 1

==== CHANNEL f1 =====  
 SFO1 499.8730869 MHz  
 NUC1 1H  
 P1 10.75 usec  
 PLW1 18.2500000 W

F2 - Processing parameters  
 SI 65536  
 SF 499.8700123 MHz  
 EM  
 WDW 0  
 SSB 0  
 LB 0.30 Hz  
 GB 0  
 PC 1.00

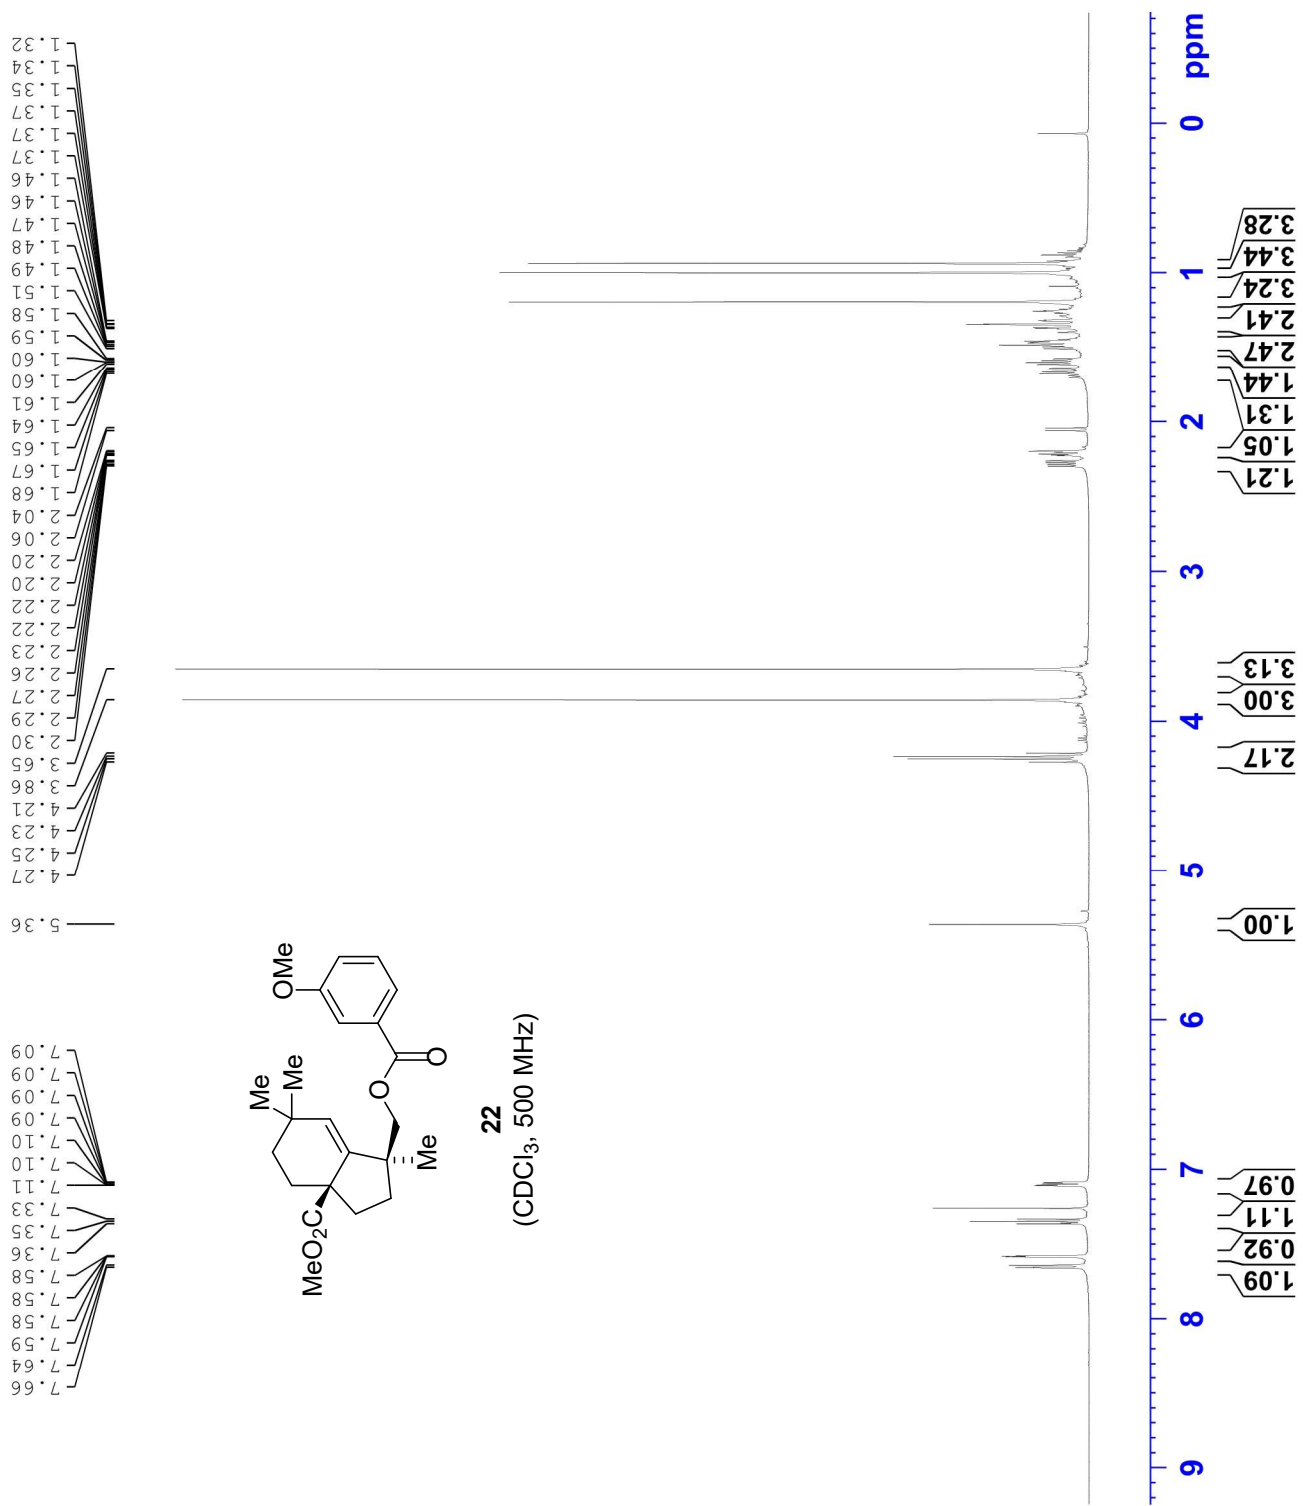

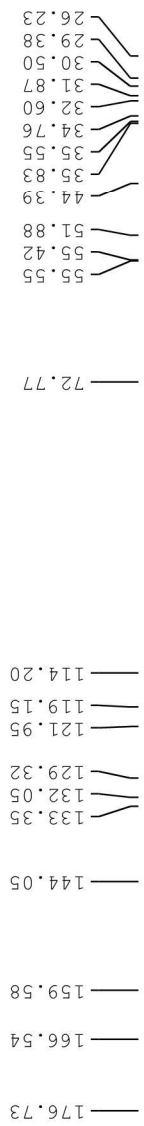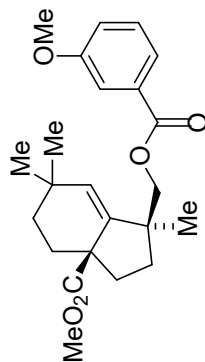

**22**  
(CDCl<sub>3</sub>, 125 MHz)

Current Data Parameters  
 NAME Yh-2-62-a  
 EXPNO 4  
 PROCNO 4

F2 - Acquisition Parameters

Date\_ 20180104  
 Time\_ 22.55  
 INSTRUM spect  
 PROBHD 5 mm PABBO BB/  
 PULPROG zgdc  
 TD 187496  
 SOLVENT CDC13  
 NS 366  
 DS 0  
 SWH 31250.000 Hz  
 FIDRES 0.166670 Hz  
 AQ 2.9999361 sec  
 RG 2050  
 DW 16.000 usec  
 DE 6.50 usec  
 TE 297.7 K  
 D1 3.0000000 sec  
 D11 0.0300000 sec  
 TD0 1

==== CHANNEL f1 =====  
 SF01 125.7049802 MHz  
 NUC1 13C  
 P1 10.00 usec  
 PLW1 72.83999634 W

==== CHANNEL f2 =====  
 SF02 499.8724993 MHz  
 NUC2 1H  
 CPDPRG[2] waltz16  
 PCPD2 80.00 usec  
 PLW2 19.00000000 W  
 PLW12 0.29688001 W

F2 - Processing parameters  
 SI 1048576  
 SF 125.6924115 MHz  
 EM  
 WDW 0  
 SSB 0  
 LB 0.30 Hz  
 GB 0  
 PC 1.40

Current Data Parameters  
 NAME Yh-2-77-a  
 EXPNO 1  
 PROCNO 1

F2 - Acquisition Parameters

Date\_ 20180124  
 Time\_ 22.13  
 INSTRUM spect  
 PROBHD 5 mm PABBO BB/  
 PULPROG zg  
 TD 59998  
 SOLVENT CDC13  
 NS 2  
 DS 0  
 SWH 10000.000 Hz  
 FIDRES 0.166672 Hz  
 AQ 2.9999001 sec  
 RG 35.92  
 DW 50.000 usec  
 DE 6.50 usec  
 TE 296.9 K  
 D1 3.0000000 sec  
 TD0 1

==== CHANNEL f1 =====  
 SFO1 499.8730869 MHz  
 NUC1 1H  
 P1 10.75 usec  
 PLW1 18.2500000 W

F2 - Processing parameters  
 SI 65536  
 SF 499.8700124 MHz  
 EM  
 WDW 0  
 SSB 0  
 LB 0.30 Hz  
 GB 0  
 PC 1.00

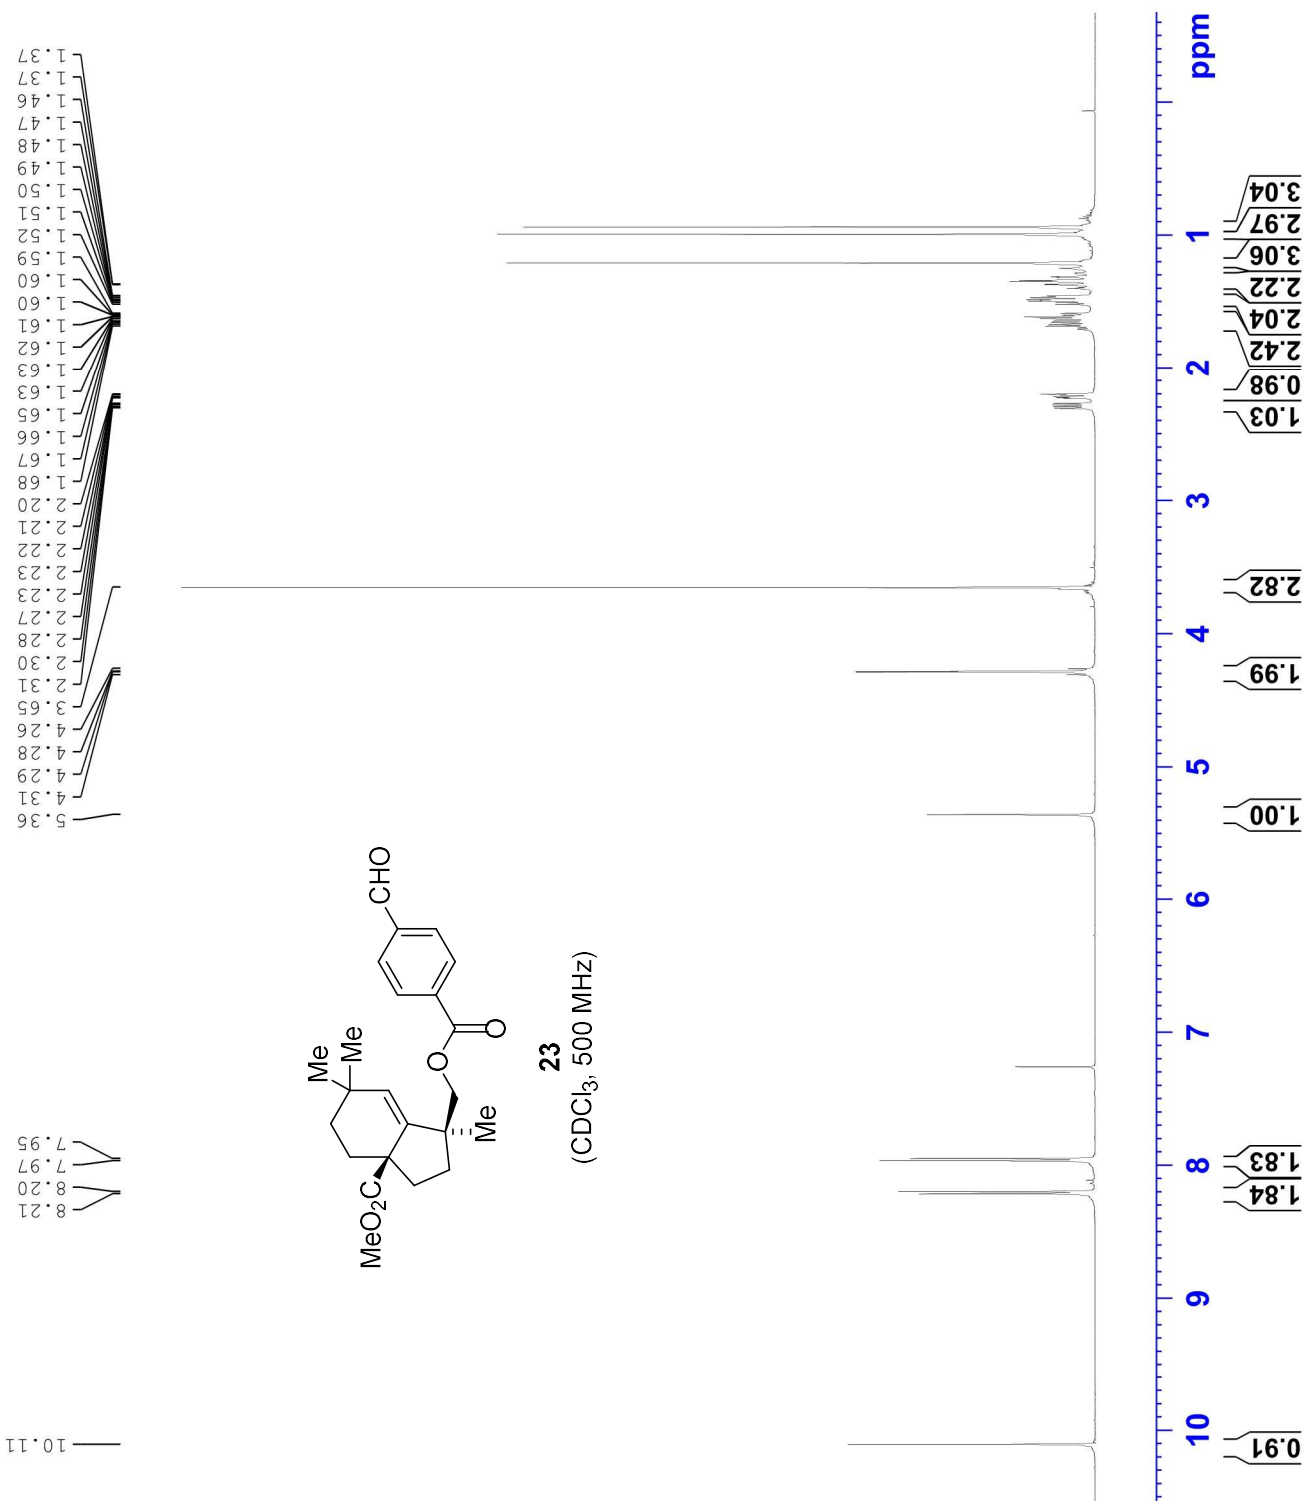

Current Data Parameters  
 NAME Yh-2-77-a  
 EXPNO 3  
 PROCNO 3

F2 - Acquisition Parameters  
 Date\_ 20180124  
 Time\_ 22.35  
 INSTRUM spect  
 PROBHD 5 mm PABBO BB/  
 PULPROG zgdc  
 TD 187496  
 SOLVENT CDC13  
 NS 135  
 DS 0  
 SWH 31250.000 Hz  
 FIDRES 0.166670 Hz  
 AQ 2.9999361 sec  
 RG 2050  
 DW 16.000 usec  
 DE 6.50 usec  
 TE 298.2 K  
 D1 3.0000000 sec  
 D11 0.0300000 sec  
 TD0 1

==== CHANNEL f1 =====  
 SFO1 125.7049802 MHz  
 NUC1 13C  
 P1 10.00 usec  
 PLW1 72.83999634 W

==== CHANNEL f2 =====  
 SFO2 499.8724993 MHz  
 NUC2 1H  
 CPDPRG[2] waltz16  
 PCPD2 80.00 usec  
 PLW2 19.00000000 W  
 PLW12 0.29688001 W

F2 - Processing parameters  
 SI 1048576  
 SF 125.6924115 MHz  
 WDW EM  
 SSB 0  
 LB 0.30 Hz  
 GB 0  
 PC 1.40

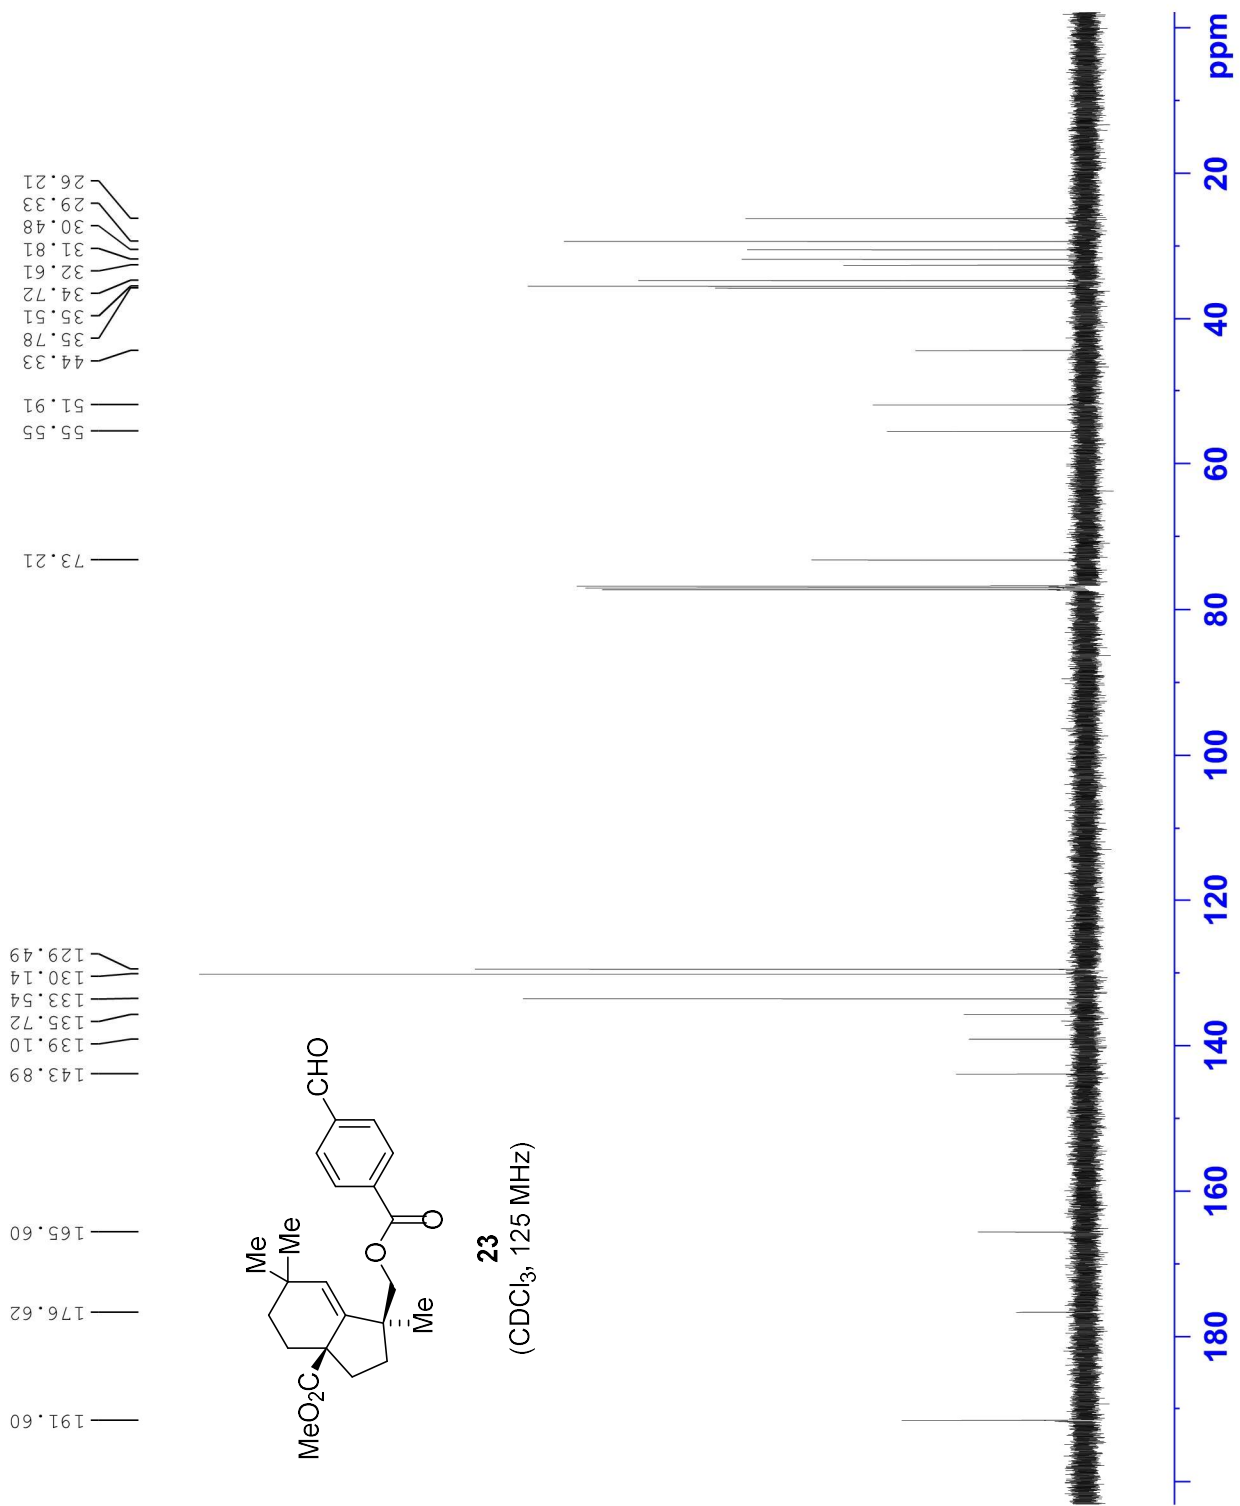

Current Data Parameters  
 NAME Yh-2-53-a  
 EXPNO 1  
 PROCNO 1

F2 - Acquisition Parameters

Date\_ 20180102  
 Time\_ 21.59  
 INSTRUM spect  
 PROBHD 5 mm PABBO BB/  
 PULPROG zg  
 TD 59998  
 SOLVENT CDC13  
 NS 4  
 DS 0  
 SWH 10000.000 Hz  
 FIDRES 0.166672 Hz  
 AQ 2.9999001 sec  
 RG 35.92  
 DW 50.000 usec  
 DE 6.50 usec  
 TE 296.1 K  
 D1 3.0000000 sec  
 TD0 1

==== CHANNEL f1 =====  
 SFO1 499.8730869 MHz  
 NUC1 1H  
 P1 10.75 usec  
 PLW1 18.25000000 W

F2 - Processing parameters  
 SI 65536  
 SF 499.8700122 MHz  
 EM  
 WDW 0  
 SSB 0  
 LB 0.30 Hz  
 GB 0  
 PC 1.00

2.30  
2.29  
2.28  
2.27  
2.23  
2.22  
2.20  
1.67  
1.66  
1.64  
1.63  
1.61  
1.60  
1.49  
1.48  
1.47  
1.37  
1.36  
1.34  
1.19  
1.09  
0.99  
0.94

8.15  
8.14  
7.76  
7.74  
5.34  
4.31  
4.28  
4.28  
4.26  
3.65  
2.30

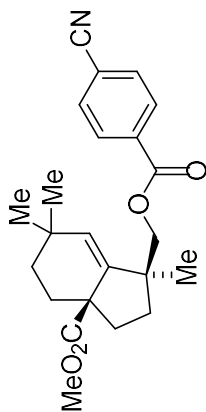

**24**  
 (CDCl<sub>3</sub>, 500 MHz)

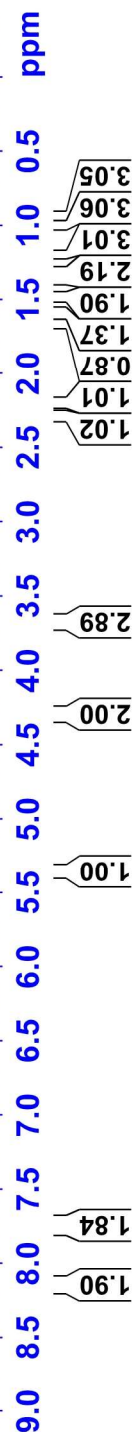

176.56  
 164.97  
 143.83  
 134.55  
 133.58  
 132.20  
 130.05  
 118.01  
 116.27  
 73.37  
 55.55  
 51.92  
 44.30  
 35.74  
 35.48  
 34.70  
 32.61  
 31.77  
 30.47  
 29.31  
 26.17

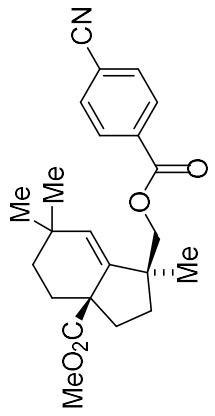

**24**  
 (CDCl<sub>3</sub>, 125 MHz)

Current Data Parameters  
 NAME Yh-2-53-a  
 EXPNO 2  
 PROCNO 2  
 F2 - Acquisition Parameters  
 Date\_ 20180102  
 Time\_ 22.29  
 INSTRUM spect  
 PROBHD 5 mm PABBO BB/  
 PULPROG zgdc  
 TD 187496  
 SOLVENT CDCl3  
 NS 273  
 DS 0  
 SWH 31250.000 Hz  
 FIDRES 0.166670 Hz  
 AQ 2.9999361 sec  
 RG 2050  
 DW 16.000 usec  
 DE 6.50 usec  
 TE 297.5 K  
 D1 3.0000000 sec  
 D11 0.0300000 sec  
 TD0 1  
 ===== CHANNEL f1 =====  
 SF01 125.7049802 MHz  
 NUC1 13C  
 P1 10.00 usec  
 PLW1 72.83999634 W  
 ===== CHANNEL f2 =====  
 SF02 499.8724993 MHz  
 NUC2 1H  
 CPDPRG[2] waltz16  
 PCPD2 80.00 usec  
 PLW2 19.00000000 W  
 PLW12 0.29688001 W  
 F2 - Processing parameters  
 SI 1048576  
 SF 125.6924115 MHz  
 WDW EM  
 SSB 0  
 LB 0.30 Hz  
 GB 0  
 PC 1.40

ppm



176.64  
165.43  
143.88  
134.18  
133.93  
133.52  
129.93  
125.39  
125.36

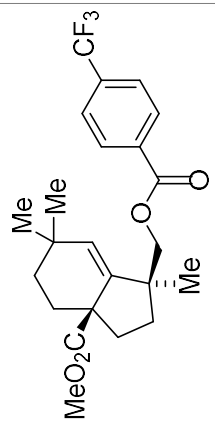

**25**  
(CDCl<sub>3</sub>, 125 MHz)

73.15  
55.55  
51.92  
44.32  
44.32  
35.77  
35.50  
34.71  
32.61  
30.48  
29.32  
26.18

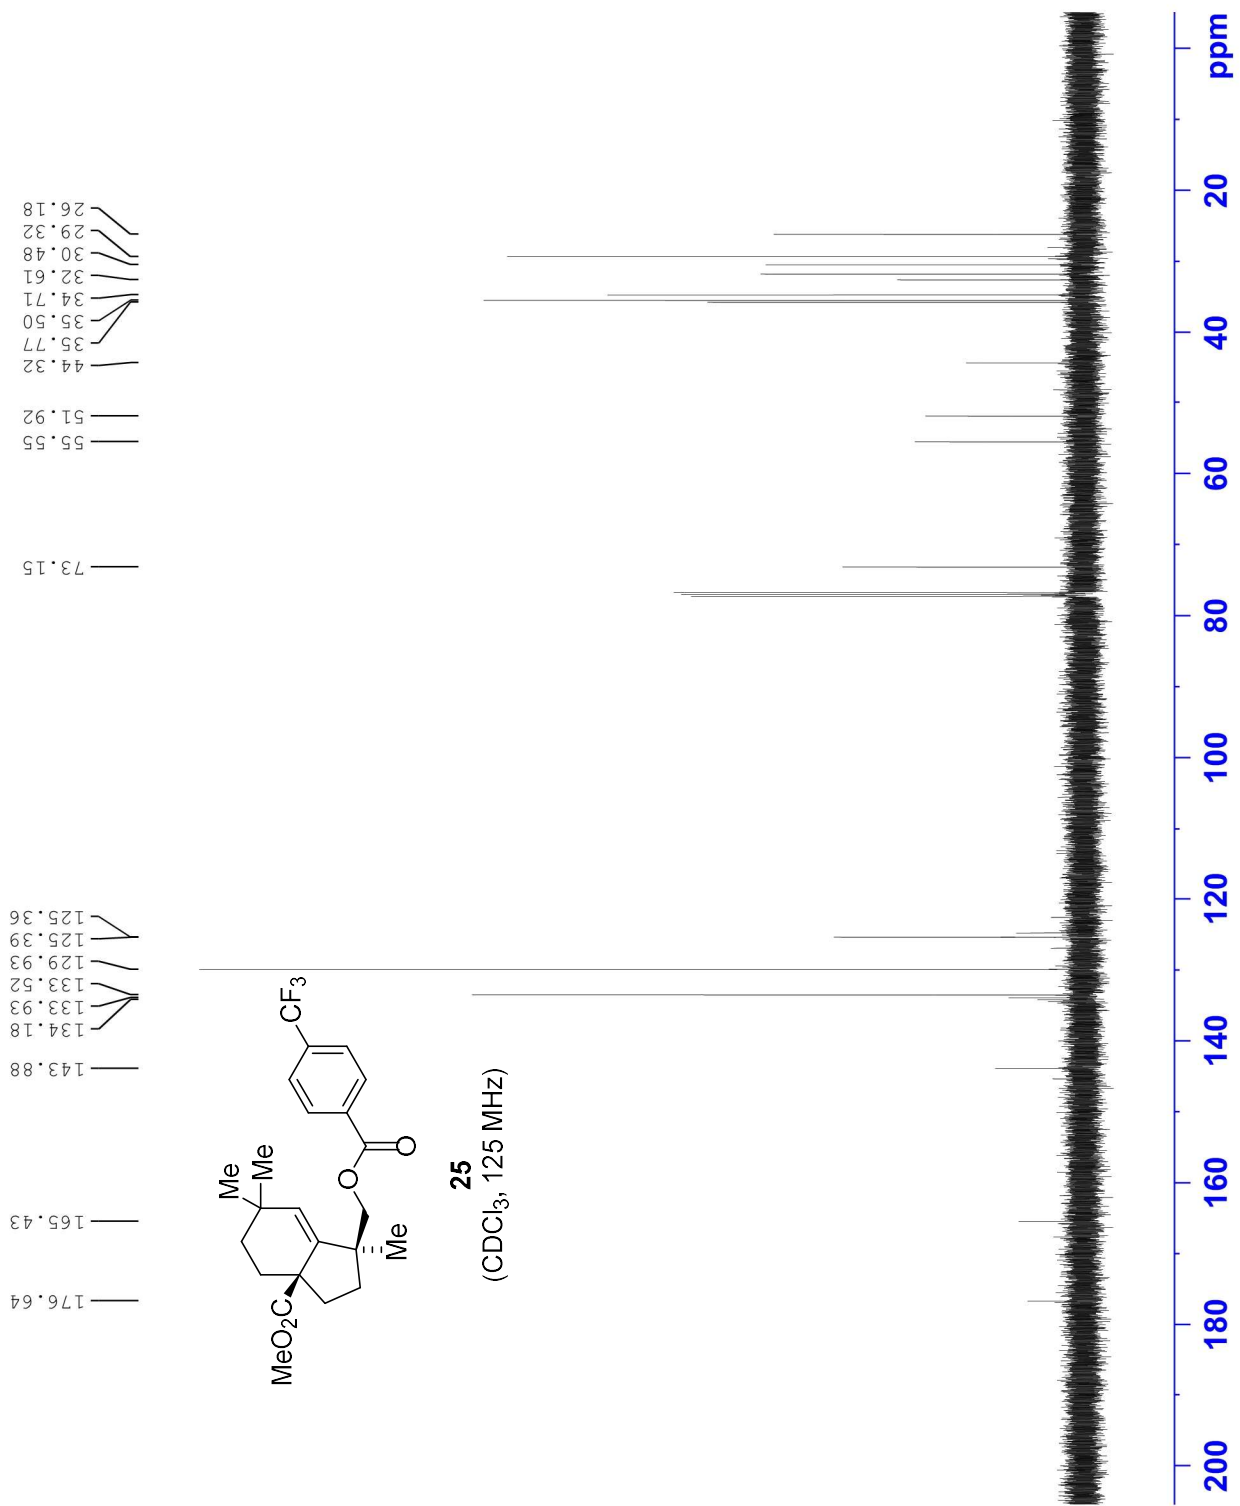

Current Data Parameters  
NAME Yh-2-43-a  
EXPNO 2  
PROCNO 2

F2 - Acquisition Parameters

Date\_ 20180812  
Time\_ 22.23  
INSTRUM spect  
PROBHD 5 mm PABBO BB/  
PULPROG zgdc  
TD 187496  
SOLVENT CDCl3  
NS 64  
DS 0  
SWH 31250.000 Hz  
FIDRES 0.166670 Hz  
AQ 2.9999361 sec  
RG 2050  
DW 16.000 usec  
DE 6.50 usec  
TE 297.2 K  
D1 3.00000000 sec  
D11 0.03000000 sec  
TD0 1

==== CHANNEL f1 =====  
SFO1 125.7049802 MHz  
NUC1 13C  
P1 10.00 usec  
PLW1 72.83999634 W

==== CHANNEL f2 =====  
SFO2 499.8724993 MHz  
NUC2 1H  
CPDPRG[2] waltz16  
PCPD2 80.00 usec  
PLW2 19.00000000 W  
PLW12 0.29688001 W

F2 - Processing parameters  
SI 1048576  
SF 125.6924115 MHz  
WDW EM  
SSB 0  
LB 0.30 Hz  
GB 0  
PC 1.40



Current Data Parameters  
 NAME Yh-2-69-a  
 EXPNO 1  
 PROCNO 1

F2 - Acquisition Parameters

Date\_ 20180119  
 Time\_ 21.15  
 INSTRUM spect  
 PROBHD 5 mm PABBO BB/  
 PULPROG zg  
 TD 59998  
 SOLVENT CDC13  
 NS 3  
 DS 0  
 SWH 10000.000 Hz  
 FIDRES 0.166672 Hz  
 AQ 2.9999001 sec  
 RG 893.6  
 DW 50.000 usec  
 DE 6.50 usec  
 TE 297.2 K  
 D1 3.0000000 sec  
 TD0 1

==== CHANNEL f1 =====  
 SFO1 499.8730869 MHz  
 NUC1 1H  
 P1 10.75 usec  
 PLW1 18.2500000 W

F2 - Processing parameters  
 SI 65536  
 SF 499.8700123 MHz  
 EM  
 WDW 0  
 SSB 0  
 LB 0.30 Hz  
 GB 0  
 PC 1.00

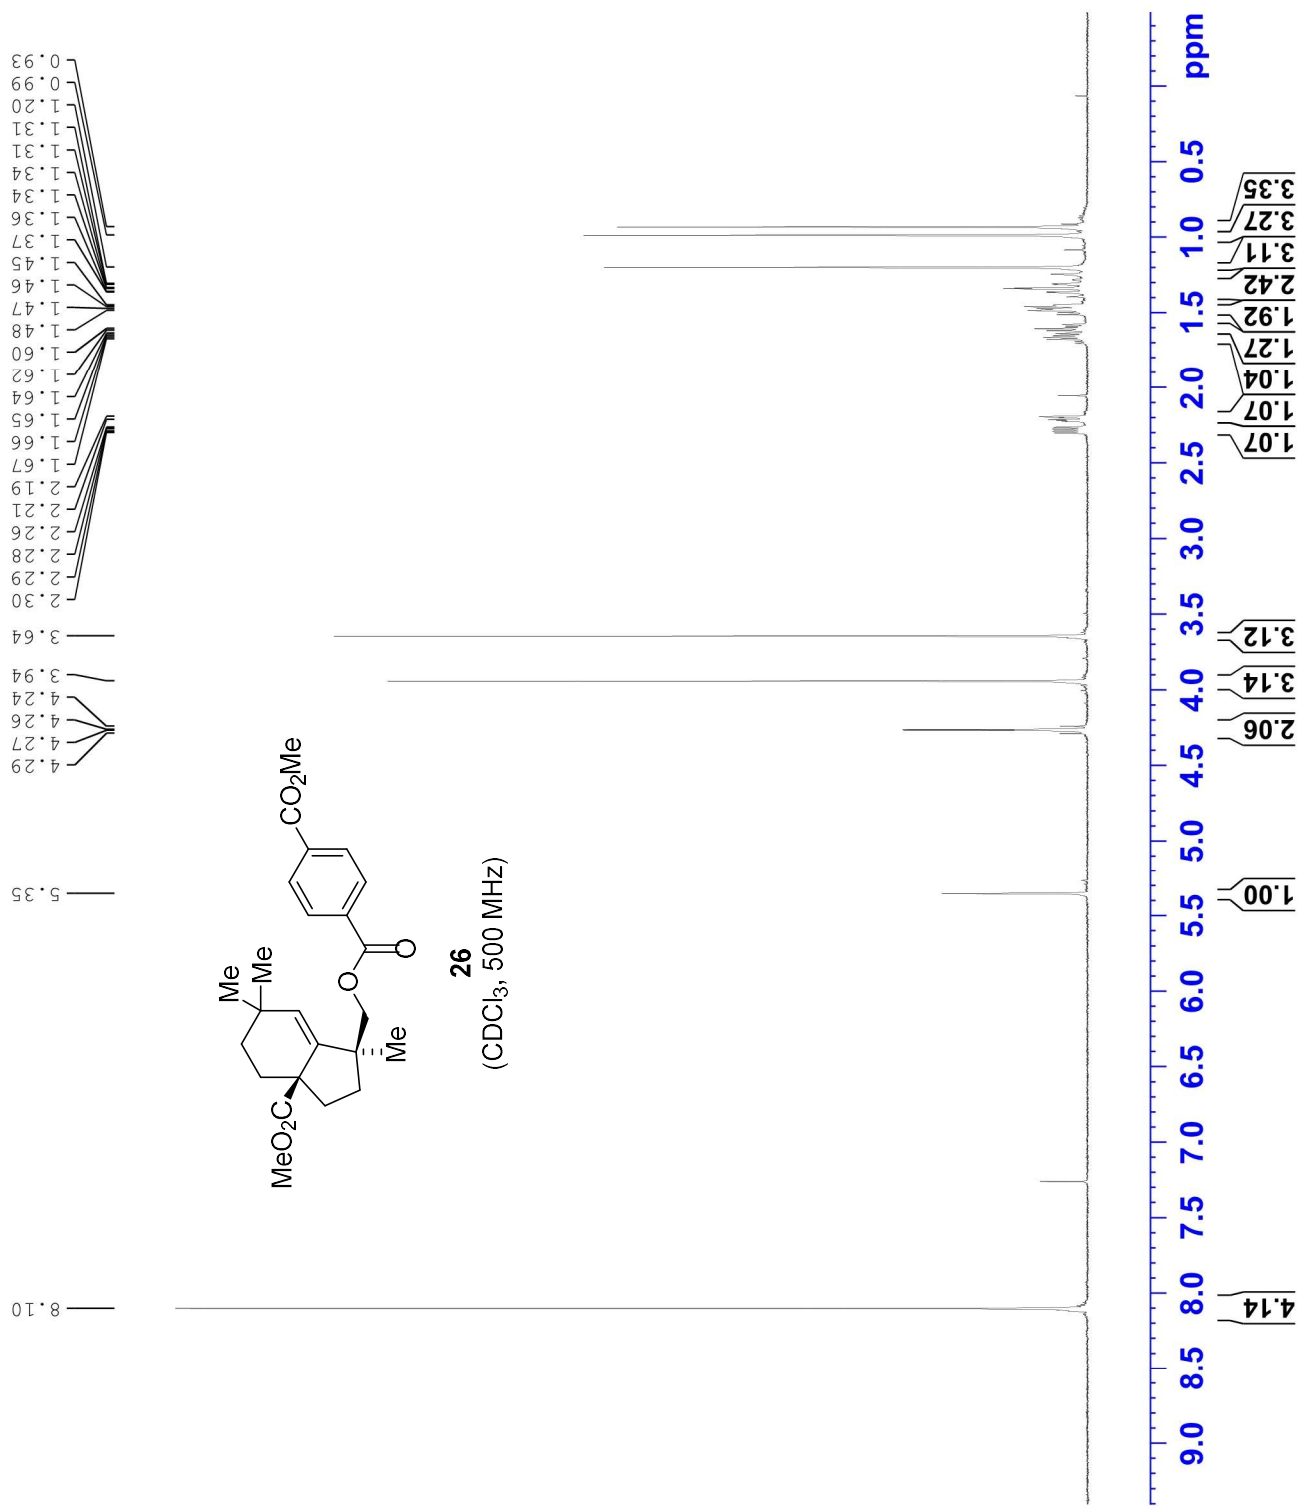

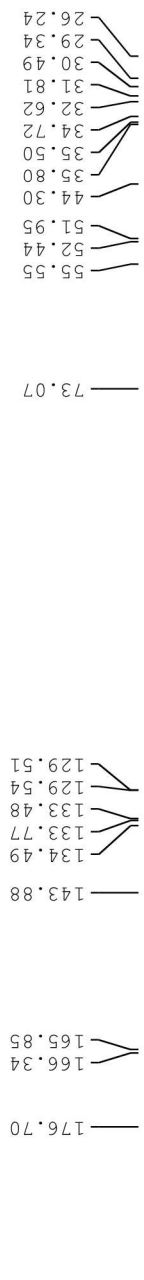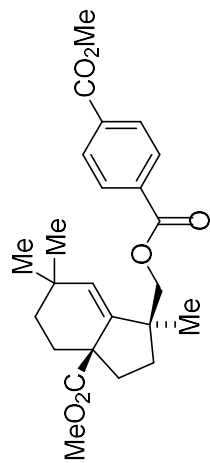

Current Data Parameters  
 NAME yh-2-69-a  
 EXPNO 2  
 PROCNO 2

F2 - Acquisition Parameters  
 Date\_ 20180119  
 Time\_ 21.22  
 INSTRUM spect  
 PROBHD 5 mm PABBO BB/  
 PULPROG zgdc  
 TD 187496  
 SOLVENT CDCl3  
 NS 6  
 DS 0  
 SWH 31250.000 Hz  
 FIDRES 0.166670 Hz  
 AQ 2.9999361 sec  
 RG 2050  
 DW 16.000 usec  
 DE 6.50 usec  
 TE 297.2 K  
 D1 3.0000000 sec  
 D11 0.0300000 sec  
 TD0 1

==== CHANNEL f1 =====  
 SFO1 125.7049802 MHz  
 NUC1 13C  
 P1 10.00 usec  
 PLW1 72.83999634 W

==== CHANNEL f2 =====  
 SFO2 499.8724993 MHz  
 NUC2 1H  
 CPDPRG[2] waltz16  
 PCPD2 80.00 usec  
 PLW2 19.00000000 W  
 PLW12 0.29688001 W

F2 - Processing parameters  
 SI 1048576  
 SF 125.6924115 MHz  
 WDW EM  
 SSB 0  
 LB 0.30 Hz  
 GB 0  
 PC 1.40

Current Data Parameters  
 NAME Yh-2-72-a  
 EXPNO 1  
 PROCNO 1

F2 - Acquisition Parameters

Date\_ 20180111  
 Time\_ 22.37  
 INSTRUM spect  
 PROBHD 5 mm PABBO BB/  
 PULPROG zg  
 TD 59998  
 SOLVENT CDC13  
 NS 2  
 DS 0  
 SWH 10000.000 Hz  
 FIDRES 0.166672 Hz  
 AQ 2.9999001 sec  
 RG 28.76  
 DW 50.000 usec  
 DE 6.50 usec  
 TE 296.7 K  
 D1 3.0000000 sec  
 TD0 1

==== CHANNEL f1 =====  
 SFO1 499.8730869 MHz  
 NUC1 1H  
 P1 10.75 usec  
 PLW1 18.2500000 W

F2 - Processing parameters  
 SI 65536  
 SF 499.8700124 MHz  
 EM  
 WDW 0  
 SSB 0  
 LB 0.30 Hz  
 GB 0  
 PC 1.00

8.17  
8.15  
7.85  
7.84  
7.81  
7.80  
7.79  
7.62  
7.51  
7.50  
7.48  
5.37  
4.32  
4.29  
4.29  
4.27  
3.66  
2.31  
2.30  
2.28  
2.27  
2.27  
2.22  
2.20  
1.69  
1.68  
1.67  
1.65  
1.63  
1.62  
1.52  
1.51  
1.50  
1.49  
1.48  
1.47  
1.46  
1.40  
1.38  
1.37  
1.35  
1.35  
1.35  
1.32  
1.32  
1.21  
1.00

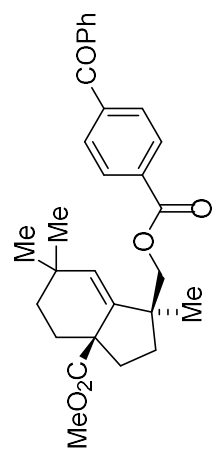

**27**  
 (CDCl<sub>3</sub>, 500 MHz)

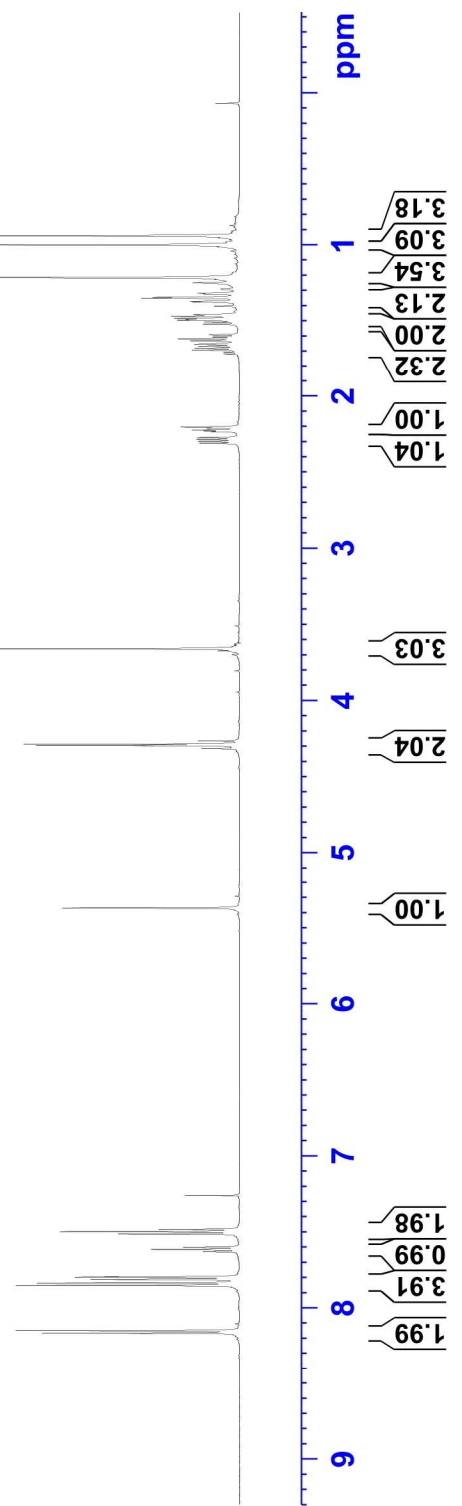

196.05  
176.69  
165.88  
143.93  
141.21  
137.04  
133.81  
133.49  
132.91  
130.11  
129.76  
129.46  
128.46

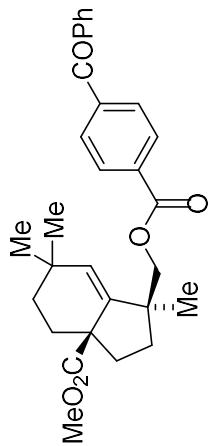

**27**  
(CDCl<sub>3</sub>, 125 MHz)

73.10  
55.56  
51.94  
44.35  
35.81  
35.54  
34.74  
32.62  
31.82  
30.51  
29.35  
26.23

Current Data Parameters  
NAME Yh-2-72-a  
EXPNO 2  
PROCNO 2

F2 - Acquisition Parameters  
Date\_ 20180111  
Time\_ 22.44  
INSTRUM spect  
PROBHD 5 mm PABBO BB/  
PULPROG zgdc  
TD 187496  
SOLVENT CDC13  
NS 43  
DS 0  
SWH 31250.000 Hz  
FIDRES 0.166670 Hz  
AQ 2.9999361 sec  
RG 2050  
DW 16.000 usec  
DE 6.50 usec  
TE 297.4 K  
D1 3.0000000 sec  
D11 0.0300000 sec  
TD0 1

==== CHANNEL f1 =====  
SFO1 125.7049802 MHz  
NUC1 13C  
P1 10.00 usec  
PLW1 72.83999634 W

==== CHANNEL f2 =====  
SFO2 499.8724993 MHz  
NUC2 1H  
CPDPRG[2] waltz16  
PCPD2 80.00 usec  
PLW2 19.00000000 W  
PLW12 0.29688001 W

F2 - Processing parameters  
SI 1048576  
SF 125.6924115 MHz  
WDW EM  
SSB 0  
LB 0.30 Hz  
GB 0  
PC 1.40

200 180 160 140 120 100 80 60 40 20 ppm

Current Data Parameters  
 NAME Yh-2-47-a  
 EXPNO 1  
 PROCNO 1

F2 - Acquisition Parameters

Date\_ 20180101  
 Time\_ 21.59  
 INSTRUM spect  
 PROBHD 5 mm PABBO BB/  
 PULPROG zg  
 TD 59998  
 SOLVENT CDCl3  
 NS 16  
 DS 0  
 SWH 10000.000 Hz  
 FIDRES 0.166672 Hz  
 AQ 2.9999001 sec  
 RG 28.76  
 DW 50.000 usec  
 DE 6.50 usec  
 TE 296.7 K  
 D1 3.0000000 sec  
 TD0 1

==== CHANNEL f1 =====  
 SFO1 499.8730869 MHz  
 NUC1 1H  
 P1 10.75 usec  
 PLW1 18.2500000 W

F2 - Processing parameters  
 SI 65536  
 SF 499.8700122 MHz  
 EM  
 WDW 0  
 SSB 0  
 LB 0.30 Hz  
 GB 0  
 PC 1.00

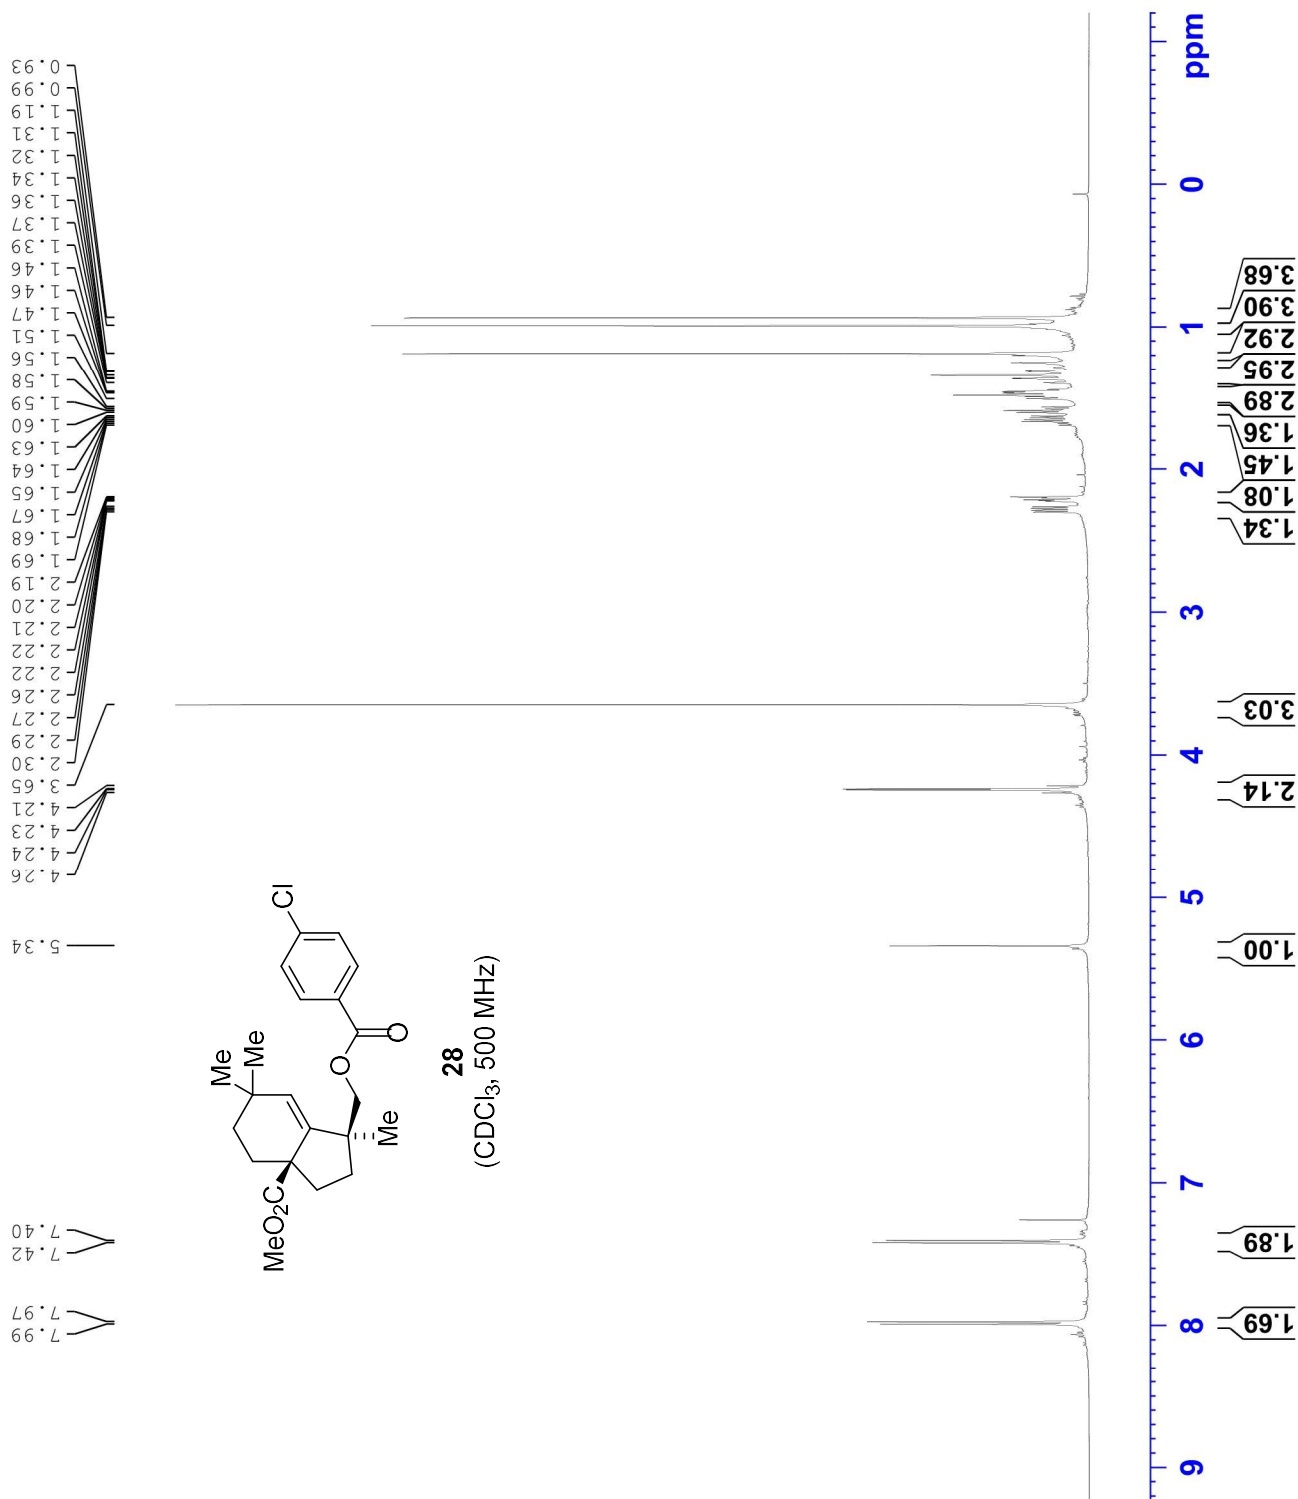

```

Current Data Parameters
NAME      Yh-2-47-a
EXPNO    2
PROCNO   2

F2 - Acquisition Parameters
Date_    20180101
Time_    22.30
INSTRUM  spect
PROBHD   5 mm PABBO BB/
PULPROG  zgdc
TD       187496
SOLVENT  CDCl3
NS       261
DS       0
SWH      31250.000 Hz
FIDRES   0.166670 Hz
AQ       2.9999361 sec
RG       2050
DW       16.000 usec
DE       6.50 usec
TE       297.7 K
D1       3.0000000 sec
D11      0.0300000 sec
TD0      1

===== CHANNEL f1 =====
SFO1    125.7049802 MHz
NUC1    13C
P1      10.00 usec
PLW1    72.83999634 W

===== CHANNEL f2 =====
SFO2    499.8724993 MHz
NUC2    1H
CPDPRG2 waltz16
PCPD2   80.00 usec
PLW2    19.0000000 W
PLW12   0.29688001 W

F2 - Processing parameters
SI      1048576
SF      125.6924115 MHz
WDW     EM
SSB     0
LB      0.30 Hz
GB      0
PC      1.40

```

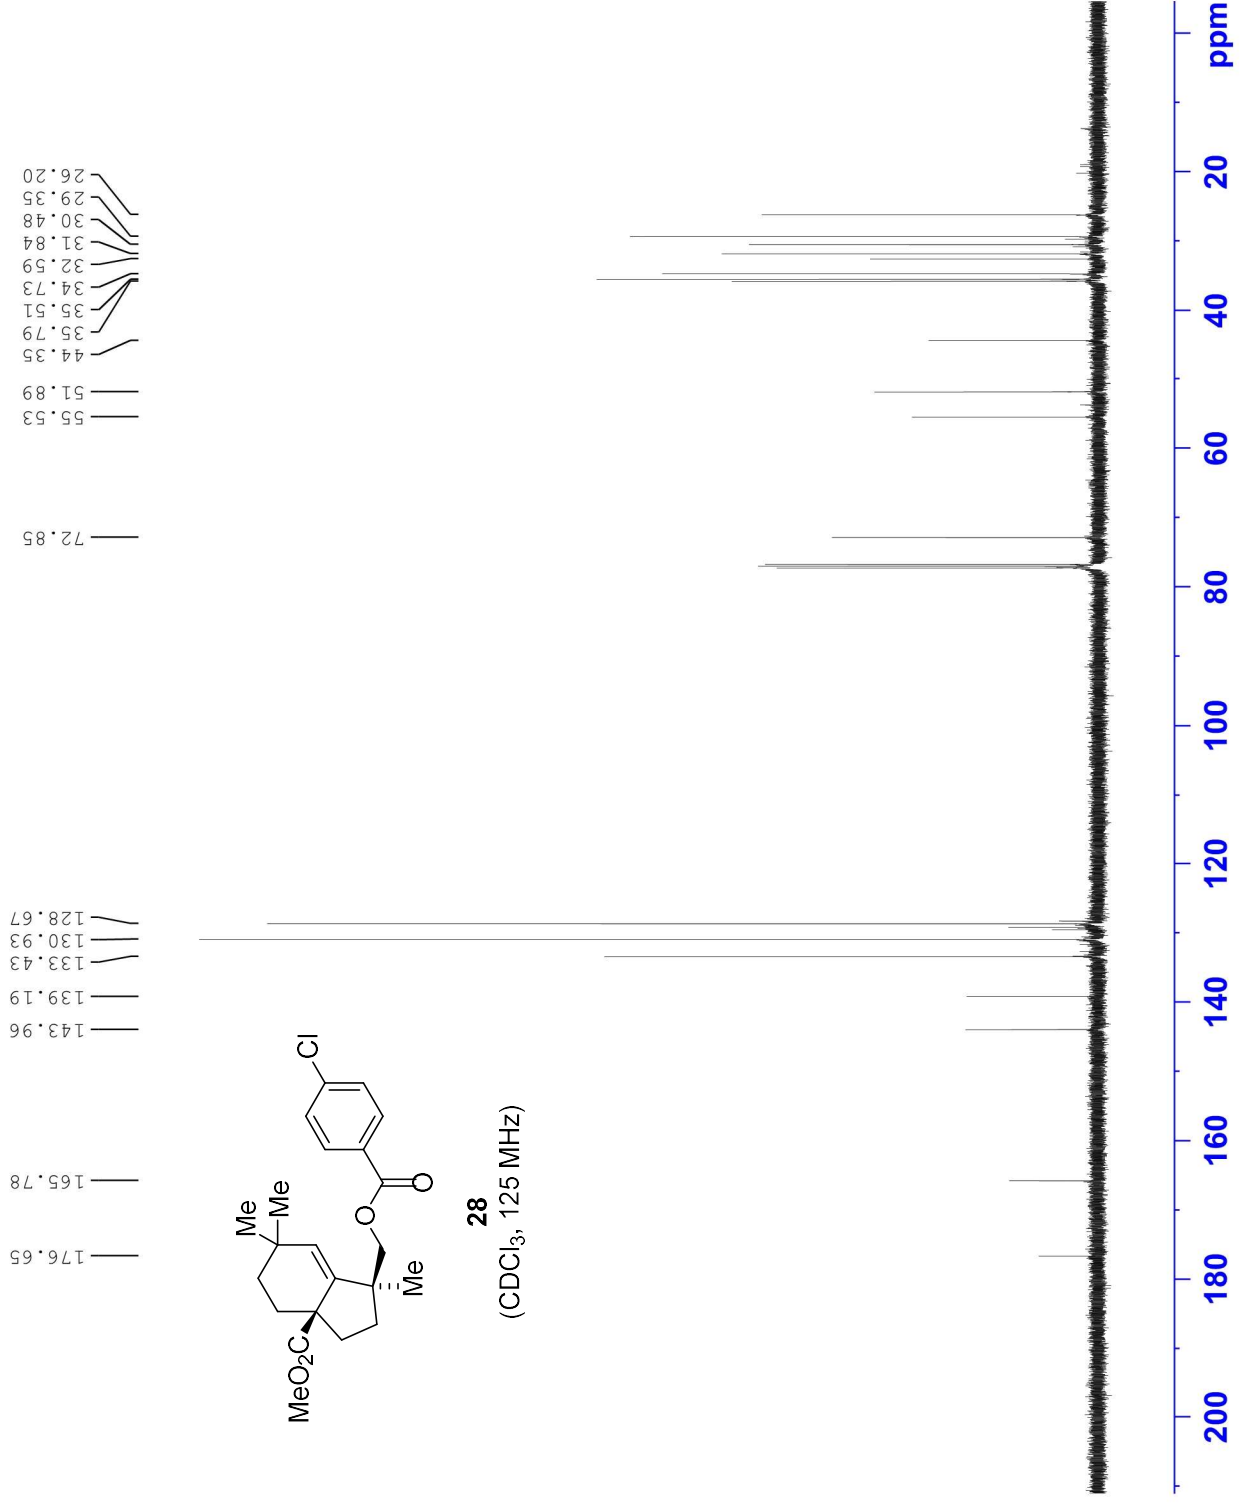

Current Data Parameters  
 NAME Yh-2-55-a  
 EXPNO 1  
 PROCNO 1

F2 - Acquisition Parameters

Date\_ 20180103  
 Time\_ 21.58  
 INSTRUM spect  
 PROBHD 5 mm PABBO BB/  
 PULPROG zg  
 TD 59998  
 SOLVENT CDC13  
 NS 4  
 DS 0  
 SWH 10000.000 Hz  
 FIDRES 0.166672 Hz  
 AQ 2.9999001 sec  
 RG 29.95  
 DW 50.000 usec  
 DE 6.50 usec  
 TE 296.2 K  
 D1 3.0000000 sec  
 TD0 1

==== CHANNEL f1 =====  
 SFO1 499.8730869 MHz  
 NUC1 1H  
 P1 10.75 usec  
 PLW1 18.2500000 W

F2 - Processing parameters  
 SI 65536  
 SF 499.8700123 MHz  
 EM  
 WDW 0  
 SSB 0  
 LB 0.30 Hz  
 GB 0  
 PC 1.00

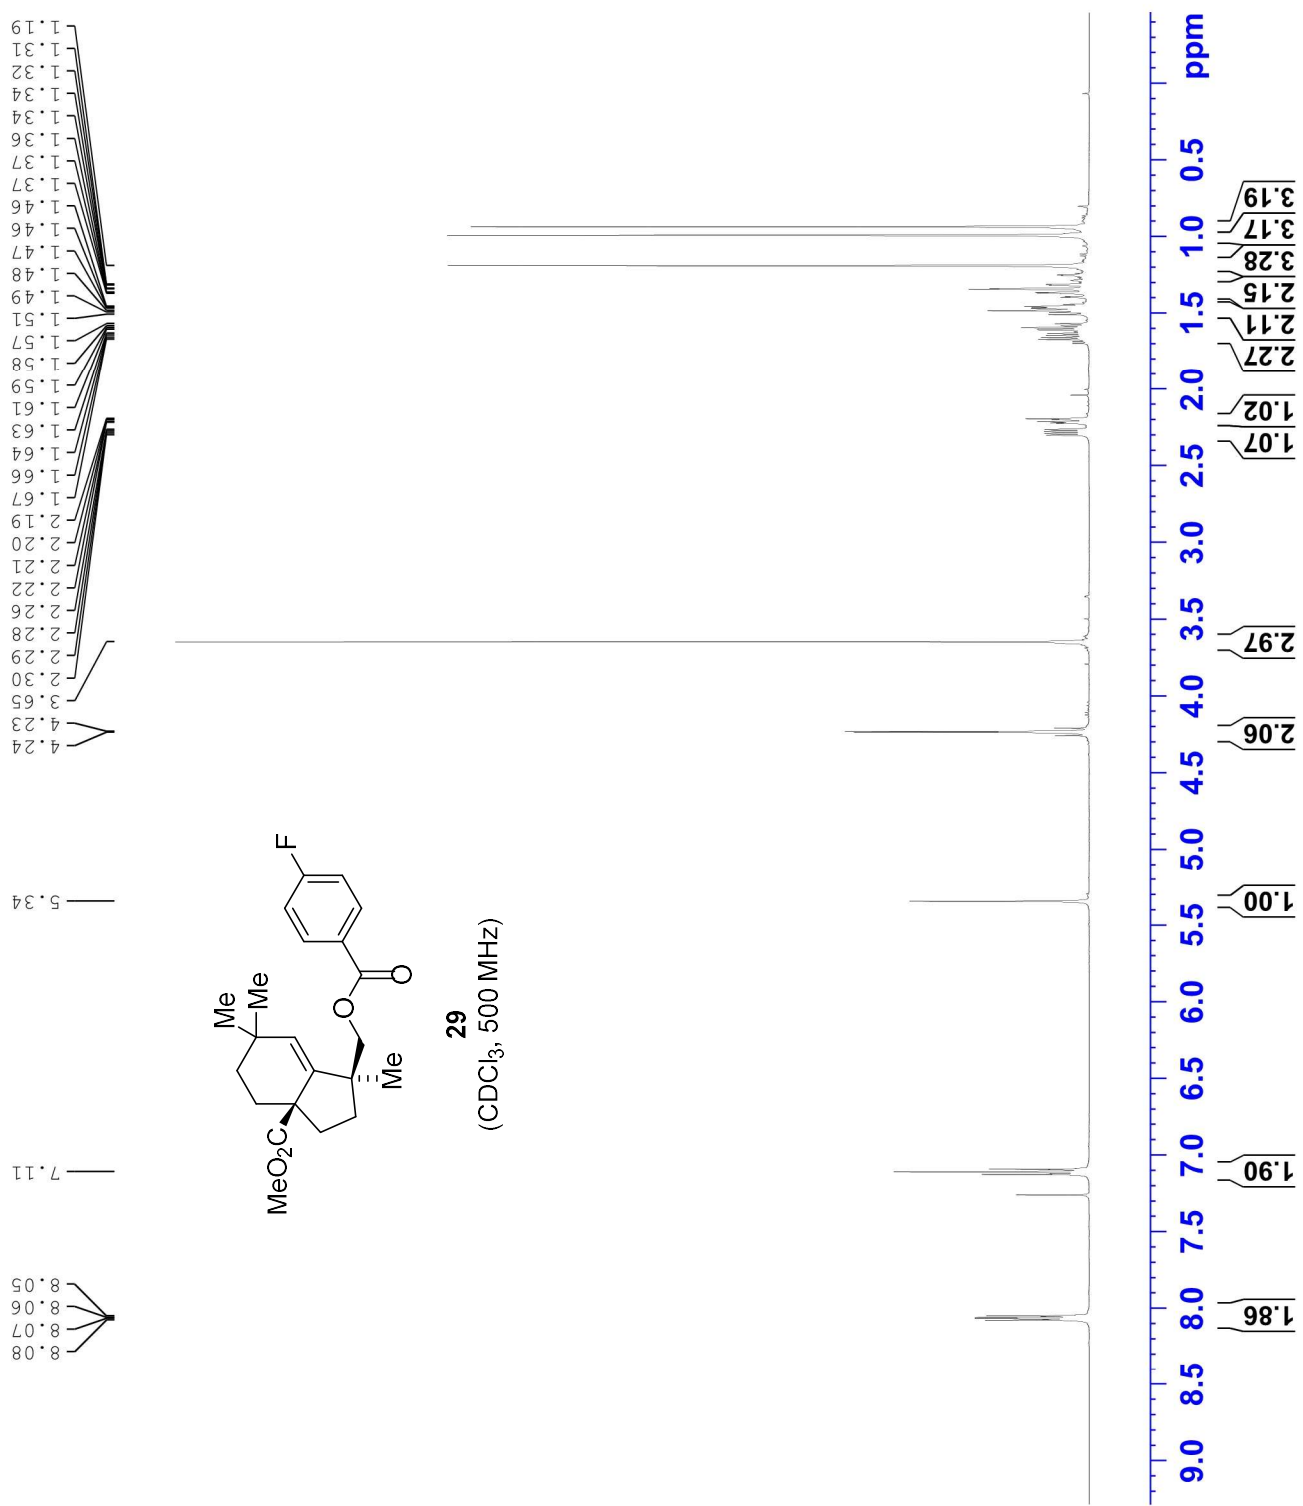

Current Data Parameters  
 NAME Yh-2-55-a  
 EXPNO 2  
 PROCNO 2

F2 - Acquisition Parameters

Date\_ 20180103  
 Time\_ 22.36  
 INSTRUM spect  
 PROBHD 5 mm PABBO BB/  
 PULPROG zgdc  
 TD 187496  
 SOLVENT CDC13  
 NS 354  
 DS 0  
 SWH 31250.000 Hz  
 FIDRES 0.166670 Hz  
 AQ 2.9999361 sec  
 RG 2050  
 DW 16.000 usec  
 DE 6.50 usec  
 TE 297.9 K  
 D1 3.00000000 sec  
 D11 0.03000000 sec  
 TD0 1

==== CHANNEL f1 =====  
 SFO1 125.7049802 MHz  
 NUC1 13C  
 P1 10.00 usec  
 PLW1 72.83999634 W

==== CHANNEL f2 =====  
 SFO2 499.8724993 MHz  
 NUC2 1H  
 CPDPRG[2] waltz16  
 PCPD2 80.00 usec  
 PLW2 19.00000000 W  
 PLW12 0.29688001 W

F2 - Processing parameters  
 SI 1048576  
 SF 125.6924115 MHz  
 WDW EM  
 SSB 0  
 LB 0.30 Hz  
 GB 0  
 PC 1.40

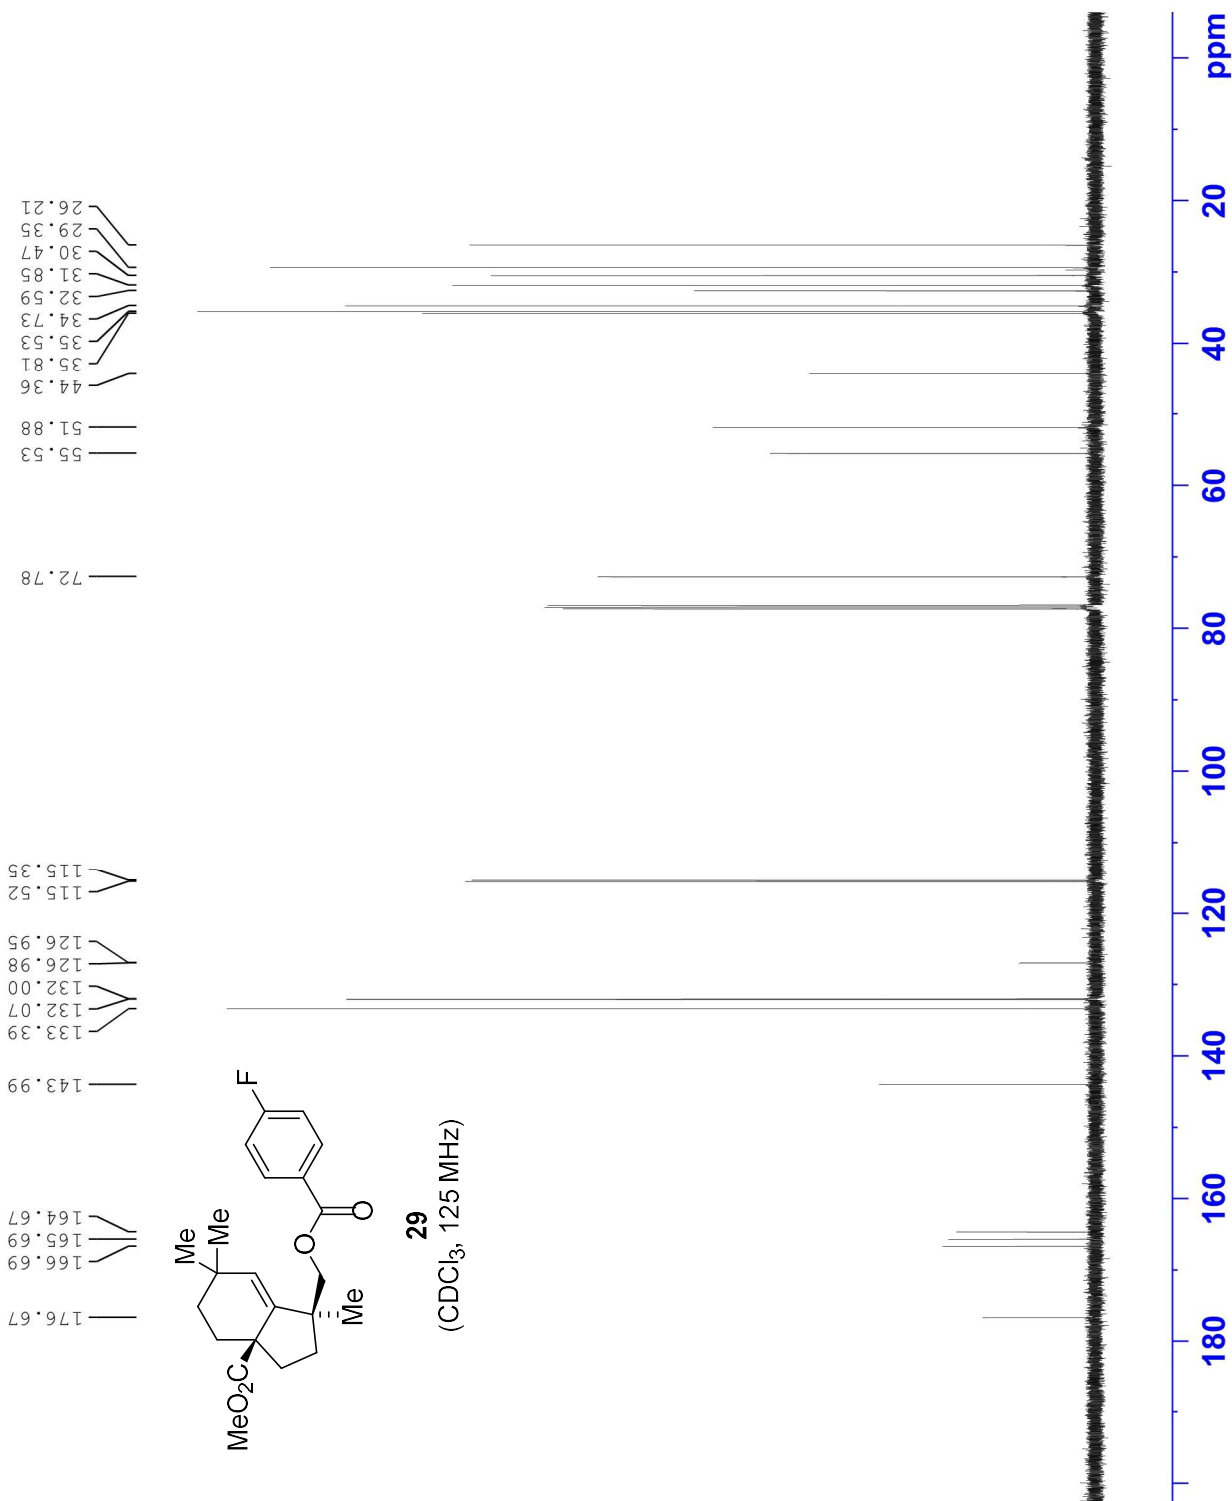



Current Data Parameters  
 NAME Yh-2-68-a  
 EXPNO 1  
 PROCNO 1

F2 - Acquisition Parameters

Date\_ 20180821  
 Time\_ 16.51  
 INSTRUM spect  
 PROBHD 5 mm PABBO BB/  
 PULPROG zg  
 TD 59998  
 SOLVENT CDC13  
 NS 5  
 DS 0  
 SWH 10000.000 Hz  
 FIDRES 0.166672 Hz  
 AQ 2.9999001 sec  
 RG 62.78  
 DW 50.000 usec  
 DE 6.50 usec  
 TE 295.7 K  
 D1 4.0000000 sec  
 TD0 1

==== CHANNEL f1 =====  
 SFO1 499.8730869 MHz  
 NUC1 1H  
 P1 3.58 usec  
 PLW1 18.25000000 W

F2 - Processing parameters  
 SI 65536  
 SF 499.8700123 MHz  
 EM  
 WDW 0  
 SSB 0  
 LB 0.30 Hz  
 GB 0  
 PC 1.00

7.85  
7.84  
7.73  
7.72  
7.71  
7.44  
7.43  
7.42  
7.41  
7.41  
7.40  
7.27  
7.27  
7.26  
7.26  
7.26  
7.25  
7.24  
7.23  
5.35  
4.27  
4.25  
4.24  
4.22  
3.65  
2.30  
2.29  
2.28  
2.28  
2.26  
2.22  
2.22  
2.20  
2.20  
1.67  
1.66  
1.64  
1.63  
1.62  
1.60  
1.49  
1.47  
1.46  
1.37  
1.36  
1.34  
1.34  
1.32  
1.31  
1.19  
1.10  
0.94

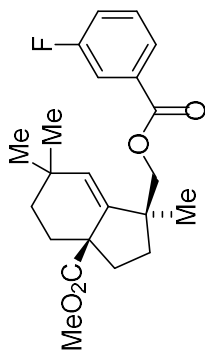

**30**  
 (CDCl<sub>3</sub>, 500 MHz)

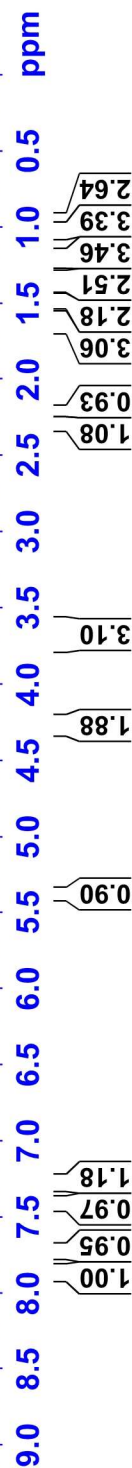

Current Data Parameters  
 NAME Yh-2-68-a  
 EXPNO 2  
 PROCNO 2

F2 - Acquisition Parameters

Date\_ 20180821  
 Time\_ 17.07  
 INSTRUM spect  
 PROBHD 5 mm PABBO BB/  
 PULPROG zgdc  
 TD 187496  
 SOLVENT CDC13  
 NS 115  
 DS 0  
 SWH 31250.000 Hz  
 FIDRES 0.166670 Hz  
 AQ 2.9999361 sec  
 RG 2050  
 DW 16.000 usec  
 DE 6.50 usec  
 TE 297.0 K  
 D1 3.00000000 sec  
 D11 0.03000000 sec  
 TD0 1

==== CHANNEL f1 =====  
 SFO1 125.7049802 MHz  
 NUC1 13C  
 P1 10.00 usec  
 PLW1 72.83999634 W

==== CHANNEL f2 =====  
 SFO2 499.8724993 MHz  
 NUC2 1H  
 CPDPRG[2] waltz16  
 PCPD2 80.00 usec  
 PLW2 19.00000000 W  
 PLW12 0.29688001 W

F2 - Processing parameters  
 SI 1048576  
 SF 125.6924115 MHz  
 WDW EM  
 SSB 0  
 LB 0.30 Hz  
 GB 0  
 PC 1.40

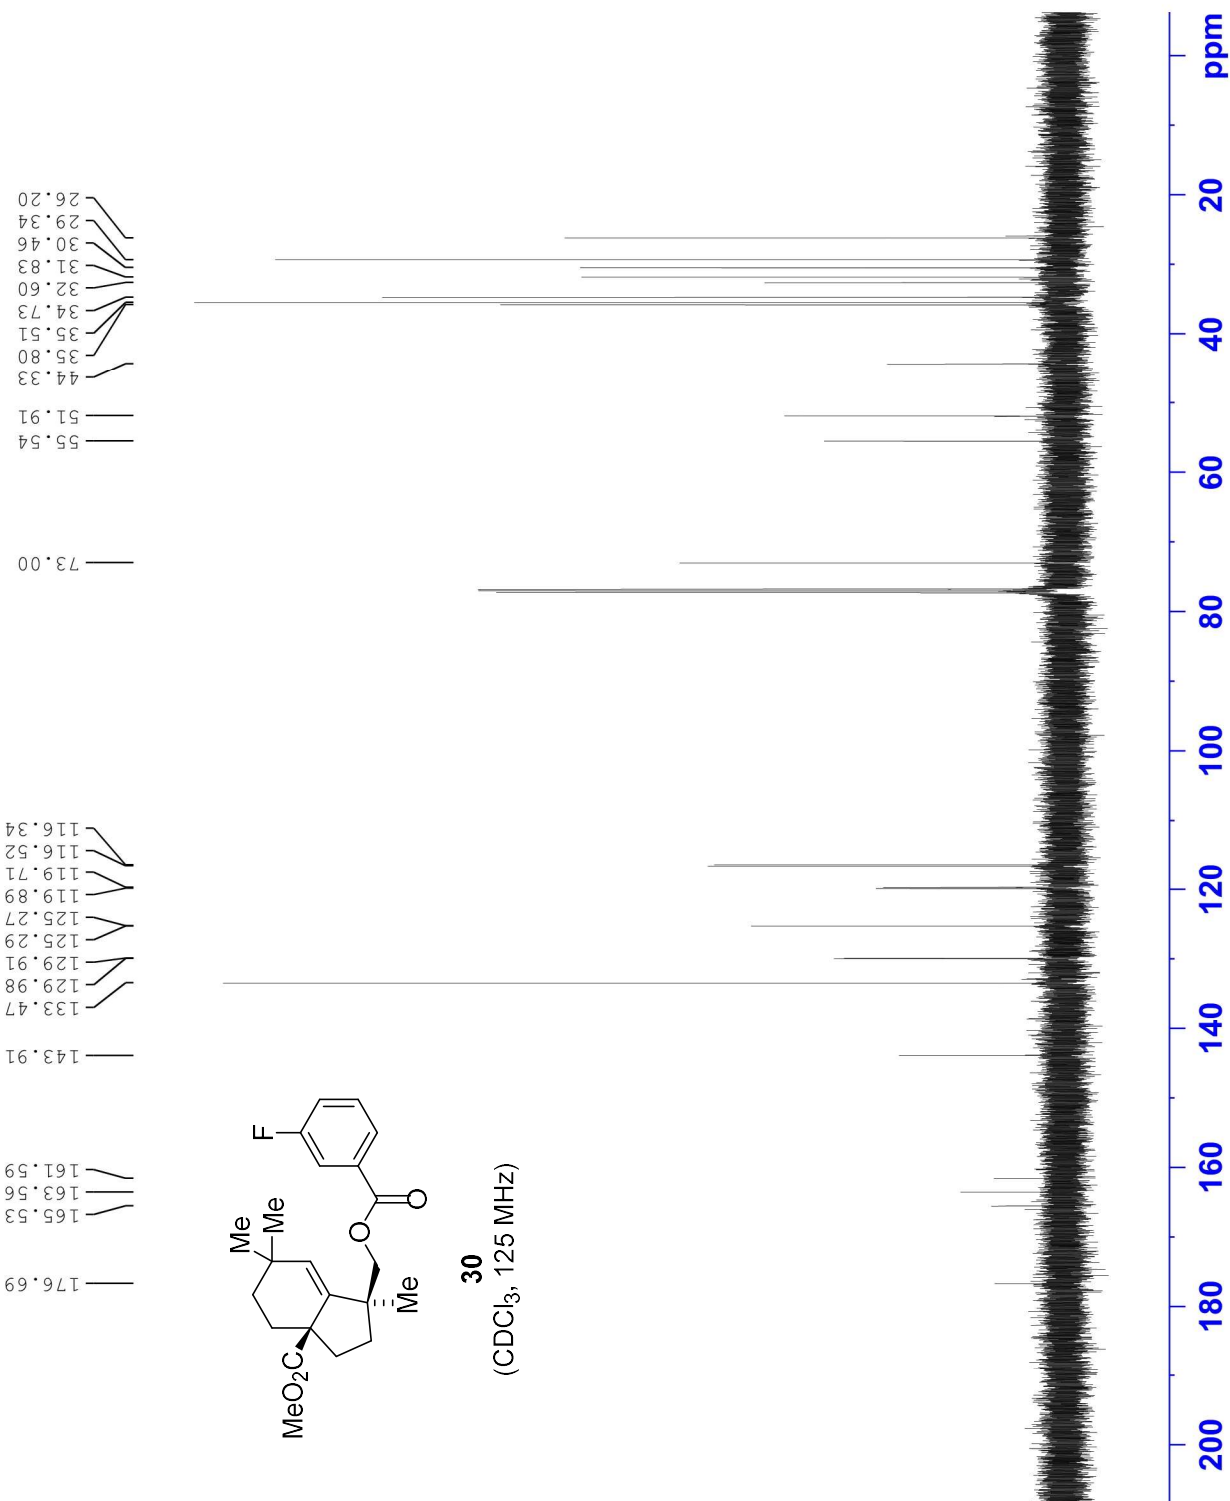

Current Data Parameters  
 NAME Yh-2-34-a  
 EXPNO 1  
 PROCNO 1

F2 - Acquisition Parameters

Date\_ 20171218  
 Time\_ 21.22  
 INSTRUM spect  
 PROBHD 5 mm PABBO BB/  
 PULPROG zg  
 TD 59998  
 SOLVENT CDCl3  
 NS 16  
 DS 0  
 SWH 10000.000 Hz  
 FIDRES 0.166672 Hz  
 AQ 2.9999001 sec  
 RG 16.71  
 DW 50.000 usec  
 DE 6.50 usec  
 TE 296.8 K  
 D1 3.0000000 sec  
 TD0 1

==== CHANNEL f1 =====  
 SFO1 499.8730869 MHz  
 NUC1 1H  
 P1 10.75 usec  
 PLW1 18.2500000 W

F2 - Processing parameters  
 SI 65536  
 SF 499.8700122 MHz  
 EM  
 WDW 0  
 SSB 0  
 LB 0.30 Hz  
 GB 0  
 PC 1.00

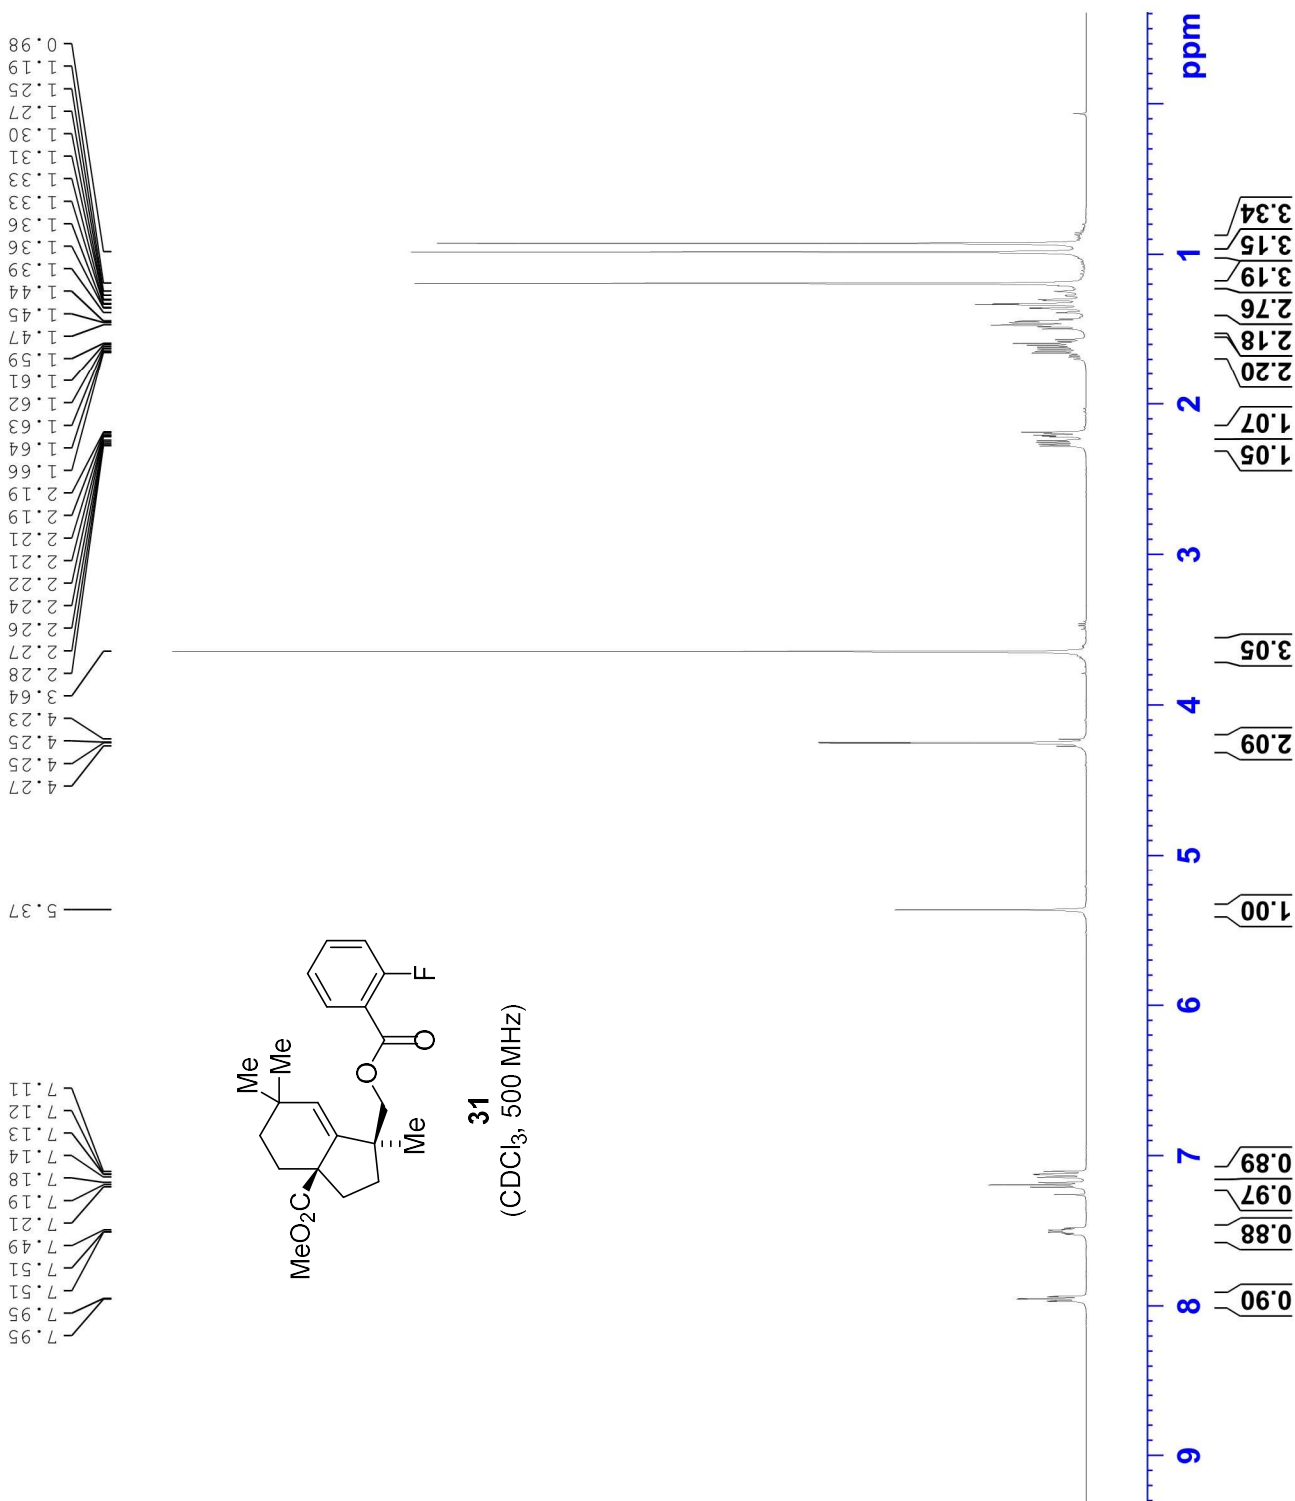

Current Data Parameters  
 NAME Yh-2-34-a  
 EXPNO 2  
 PROCNO 2

F2 - Acquisition Parameters

Date\_ 20171218  
 Time\_ 21.35  
 INSTRUM spect  
 PROBHD 5 mm PABBO BB/  
 PULPROG zgdc  
 TD 187496  
 SOLVENT CDC13  
 NS 52  
 DS 0  
 SWH 31250.000 Hz  
 FIDRES 0.166670 Hz  
 AQ 2.9999361 sec  
 RG 2050  
 DW 16.000 usec  
 DE 6.50 usec  
 TE 297.6 K  
 D1 3.0000000 sec  
 D11 0.0300000 sec  
 TD0 1

==== CHANNEL f1 =====  
 SFO1 125.7049802 MHz  
 NUC1 13C  
 P1 10.00 usec  
 PLW1 72.83999634 W

==== CHANNEL f2 =====  
 SFO2 499.8724993 MHz  
 NUC2 1H  
 CPDPRG[2] waltz16  
 PCPD2 80.00 usec  
 PLW2 19.00000000 W  
 PLW12 0.29688001 W

F2 - Processing parameters  
 SI 1048576  
 SF 125.6924115 MHz  
 WDW EM  
 SSB 0  
 LB 0.30 Hz  
 GB 0  
 PC 1.40

176.80  
 176.76  
 164.67  
 164.64  
 163.01  
 160.94  
 143.90  
 134.27  
 134.20  
 133.38  
 132.20  
 123.88  
 123.85  
 117.04  
 116.86  
 73.20  
 55.57  
 51.87  
 44.18  
 35.84  
 35.58  
 34.77  
 32.58  
 31.84  
 30.46  
 29.36  
 26.17

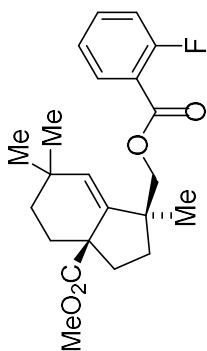

**31**

(CDCl<sub>3</sub>, 125 MHz)

ppm

Current Data Parameters  
 NAME yh-5-55-d  
 EXPNO 1  
 PROCNO 1

F2 - Acquisition Parameters

Date\_ 20190712  
 Time\_ 21.14  
 INSTRUM spect  
 PROBHD 5 mm PABBO BB/  
 PULPROG zg  
 TD 59998  
 SOLVENT CDC13  
 NS 4  
 DS 0  
 SWH 10000.000 Hz  
 FIDRES 0.166672 Hz  
 AQ 2.9999001 sec  
 RG 105.66  
 DW 50.000 usec  
 DE 6.50 usec  
 TE 297.5 K  
 D1 4.0000000 sec  
 TD0 1

==== CHANNEL f1 =====  
 SFO1 499.8730869 MHz  
 NUC1 1H  
 P1 3.58 usec  
 PLW1 18.25000000 W

F2 - Processing parameters  
 SI 65536  
 SF 499.8700124 MHz  
 EM  
 WDW 0  
 SSB 0  
 LB 0.30 Hz  
 GB 0  
 PC 1.00

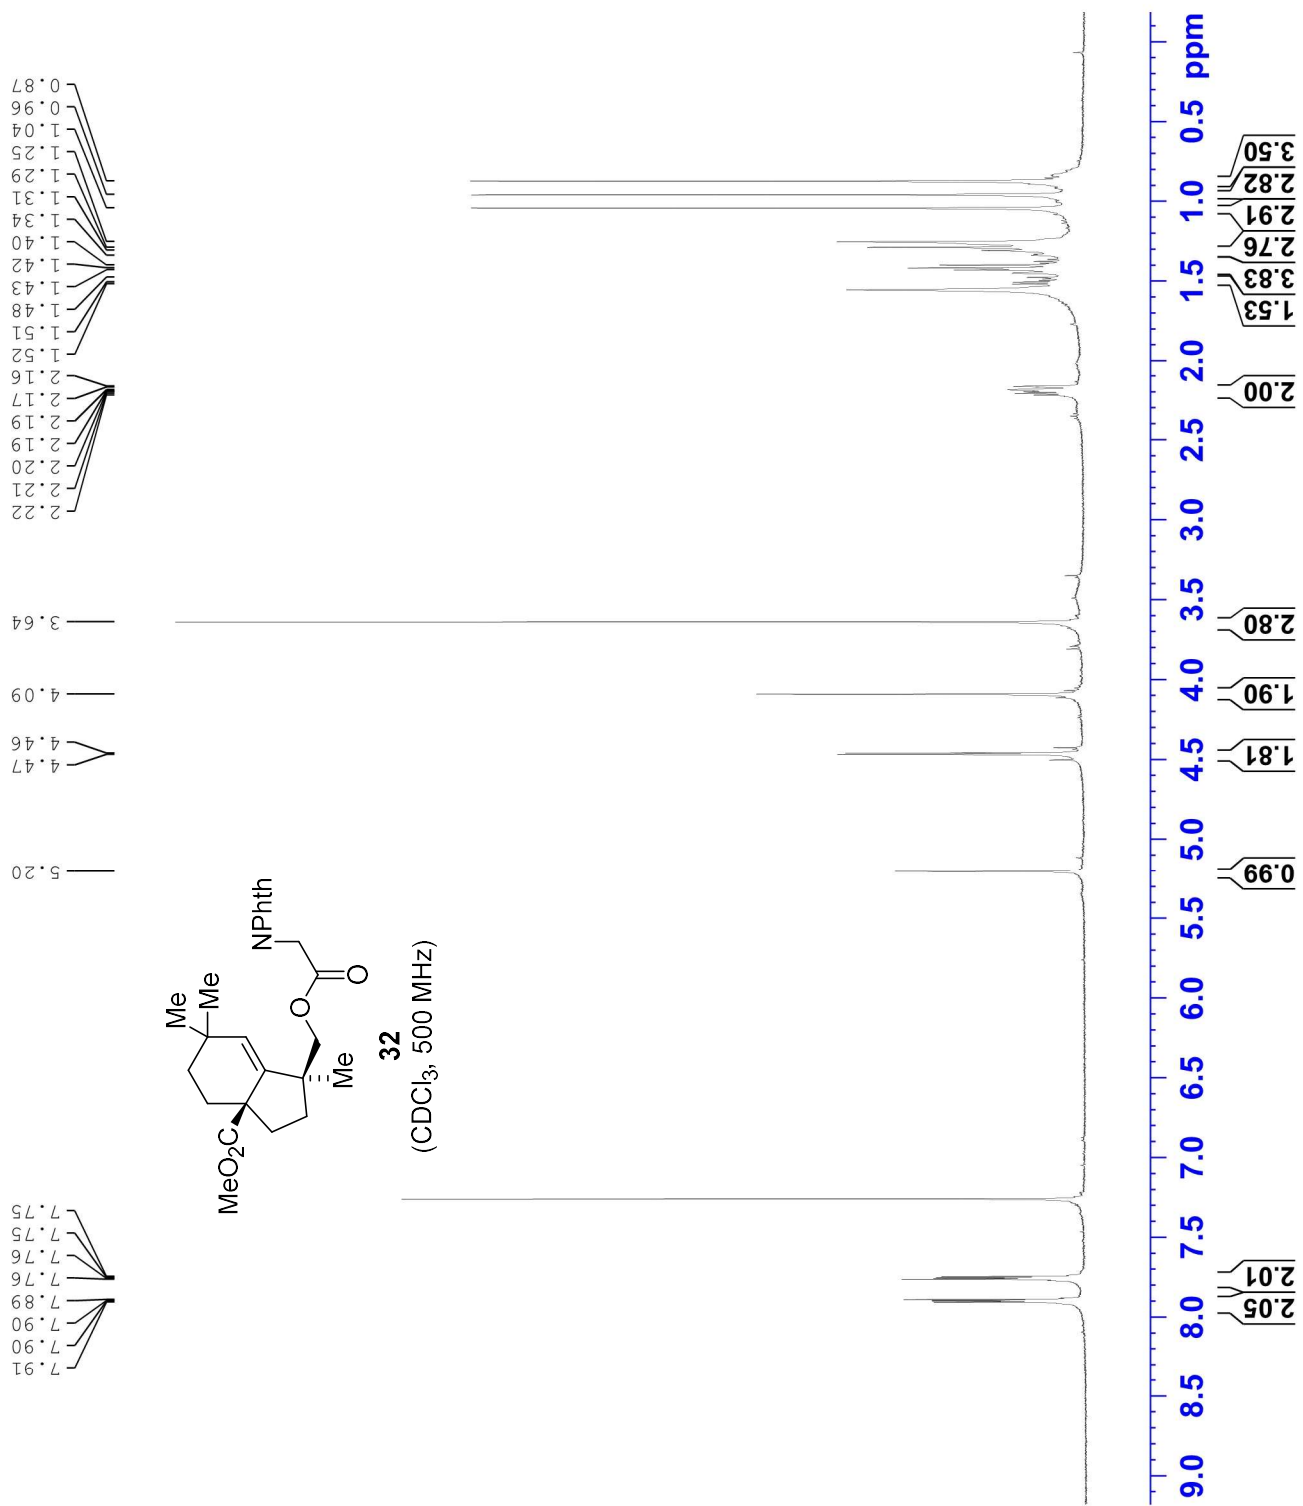

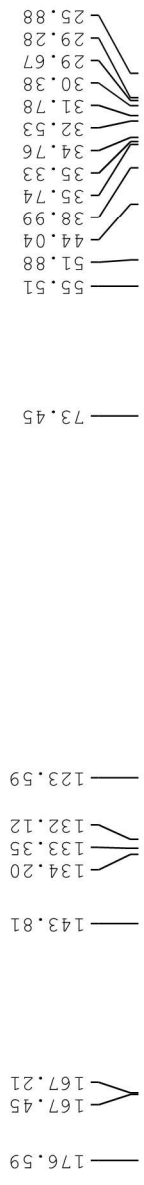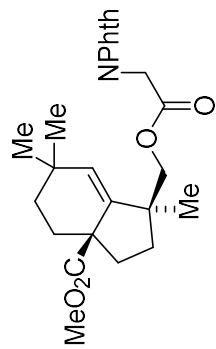

Current Data Parameters  
 NAME Yh-5-51-a  
 EXPNO 2  
 PROCNO 2

F2 - Acquisition Parameters  
 Date\_ 20180926  
 Time\_ 23.03  
 INSTRUM spect  
 PROBHD 5 mm PABBO BB/  
 PULPROG zgdc  
 TD 187496  
 SOLVENT CDCl3  
 NS 1083  
 DS 0  
 SWH 31250.000 Hz  
 FIDRES 0.166670 Hz  
 AQ 2.9999361 sec  
 RG 2050  
 DW 16.000 usec  
 DE 6.50 usec  
 TE 301.2 K  
 D1 3.00000000 sec  
 D11 0.03000000 sec  
 TD0 1

==== CHANNEL f1 =====  
 SFO1 125.7049802 MHz  
 NUC1 13C  
 P1 10.00 usec  
 PLW1 72.83999634 W

==== CHANNEL f2 =====  
 SFO2 499.8724993 MHz  
 NUC2 1H  
 CPDPRG[2] waltz16  
 PCPD2 80.00 usec  
 PLW2 19.00000000 W  
 PLW12 0.29688001 W

F2 - Processing parameters  
 SI 1048576  
 SF 125.6924115 MHz  
 WDW EM  
 SSB 0  
 LB 0.30 Hz  
 GB 0  
 PC 1.40

Current Data Parameters  
 NAME Yh-2-25-a  
 EXPNO 1  
 PROCNO 1

F2 - Acquisition Parameters

Date\_ 20171214  
 Time\_ 21.05  
 INSTRUM spect  
 PROBHD 5 mm PABBO BB/  
 PULPROG zg  
 TD 59998  
 SOLVENT CDC13  
 NS 16  
 DS 0  
 SWH 10000.000 Hz  
 FIDRES 0.166672 Hz  
 AQ 2.9999001 sec  
 RG 28.76  
 DW 50.000 usec  
 DE 6.50 usec  
 TE 296.9 K  
 D1 3.0000000 sec  
 TD0 1

==== CHANNEL f1 =====  
 SFO1 499.8730869 MHz  
 NUC1 1H  
 P1 10.75 usec  
 PLW1 18.2500000 W

F2 - Processing parameters  
 SI 65536  
 SF 499.8700123 MHz  
 EM  
 WDW 0  
 SSB 0  
 LB 0.30 Hz  
 GB 0  
 PC 1.00

3.98  
3.96  
3.95  
3.93  
3.65  
3.26  
2.25  
2.23  
2.23  
2.18  
2.17  
2.08  
1.96  
1.71  
1.68  
1.62  
1.62  
1.52  
1.51  
1.50  
1.50  
1.46  
1.45  
1.44  
1.43  
1.34  
1.34  
1.32  
1.30  
1.29  
1.10  
0.98

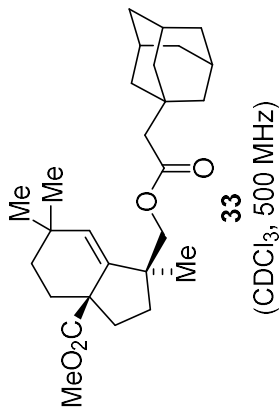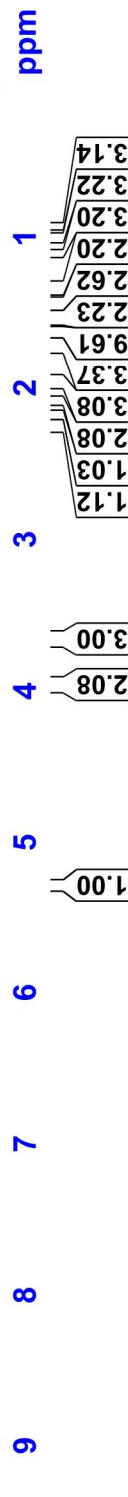

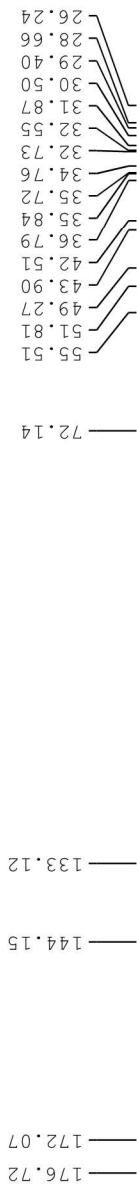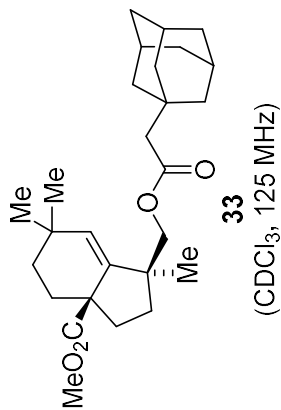

Current Data Parameters  
 NAME Yh-2-25-a  
 EXPNO 2  
 PROCNO 2

F2 - Acquisition Parameters  
 Date\_ 20171214  
 Time\_ 22.48  
 INSTRUM spect  
 PROBHD 5 mm PABBO BB/  
 PULPROG zgdc  
 TD 187496  
 SOLVENT CDC13  
 NS 978  
 DS 0  
 SWH 31250.000 Hz  
 FIDRES 0.166670 Hz  
 AQ 2.9999361 sec  
 RG 2050  
 DW 16.000 usec  
 DE 6.50 usec  
 TE 298.9 K  
 D1 3.0000000 sec  
 D11 0.0300000 sec  
 TD0 1

===== CHANNEL f1 =====  
 SFO1 125.7049802 MHz  
 NUC1 13C  
 P1 10.00 usec  
 PLW1 72.83999634 W

===== CHANNEL f2 =====  
 SFO2 499.8724993 MHz  
 NUC2 1H  
 CPDPRG[2] waltz16  
 PCPD2 80.00 usec  
 PLW2 19.00000000 W  
 PLW12 0.29688001 W

F2 - Processing parameters  
 SI 1048576  
 SF 125.6924115 MHz  
 WDW EM  
 SSB 0  
 LB 0.30 Hz  
 GB 0  
 PC 1.40



Current Data Parameters  
 NAME Yh-2-73-a  
 EXPNO 1  
 PROCNO 1

F2 - Acquisition Parameters

Date\_ 20180121  
 Time\_ 22.32  
 INSTRUM spect  
 PROBHD 5 mm PABBO BB/  
 PULPROG zg  
 TD 59998  
 SOLVENT CDC13  
 NS 2  
 DS 0  
 SWH 10000.000 Hz  
 FIDRES 0.166672 Hz  
 AQ 2.9999001 sec  
 RG 19.64  
 DW 50.000 usec  
 DE 6.50 usec  
 TE 296.8 K  
 D1 3.0000000 sec  
 TD0 1

==== CHANNEL f1 =====  
 SFO1 499.8730869 MHz  
 NUC1 1H  
 P1 10.75 usec  
 PLW1 18.2500000 W

F2 - Processing parameters  
 SI 65536  
 SF 499.8700124 MHz  
 EM  
 WDW 0  
 SSB 0  
 LB 0.30 Hz  
 GB 0  
 PC 1.00

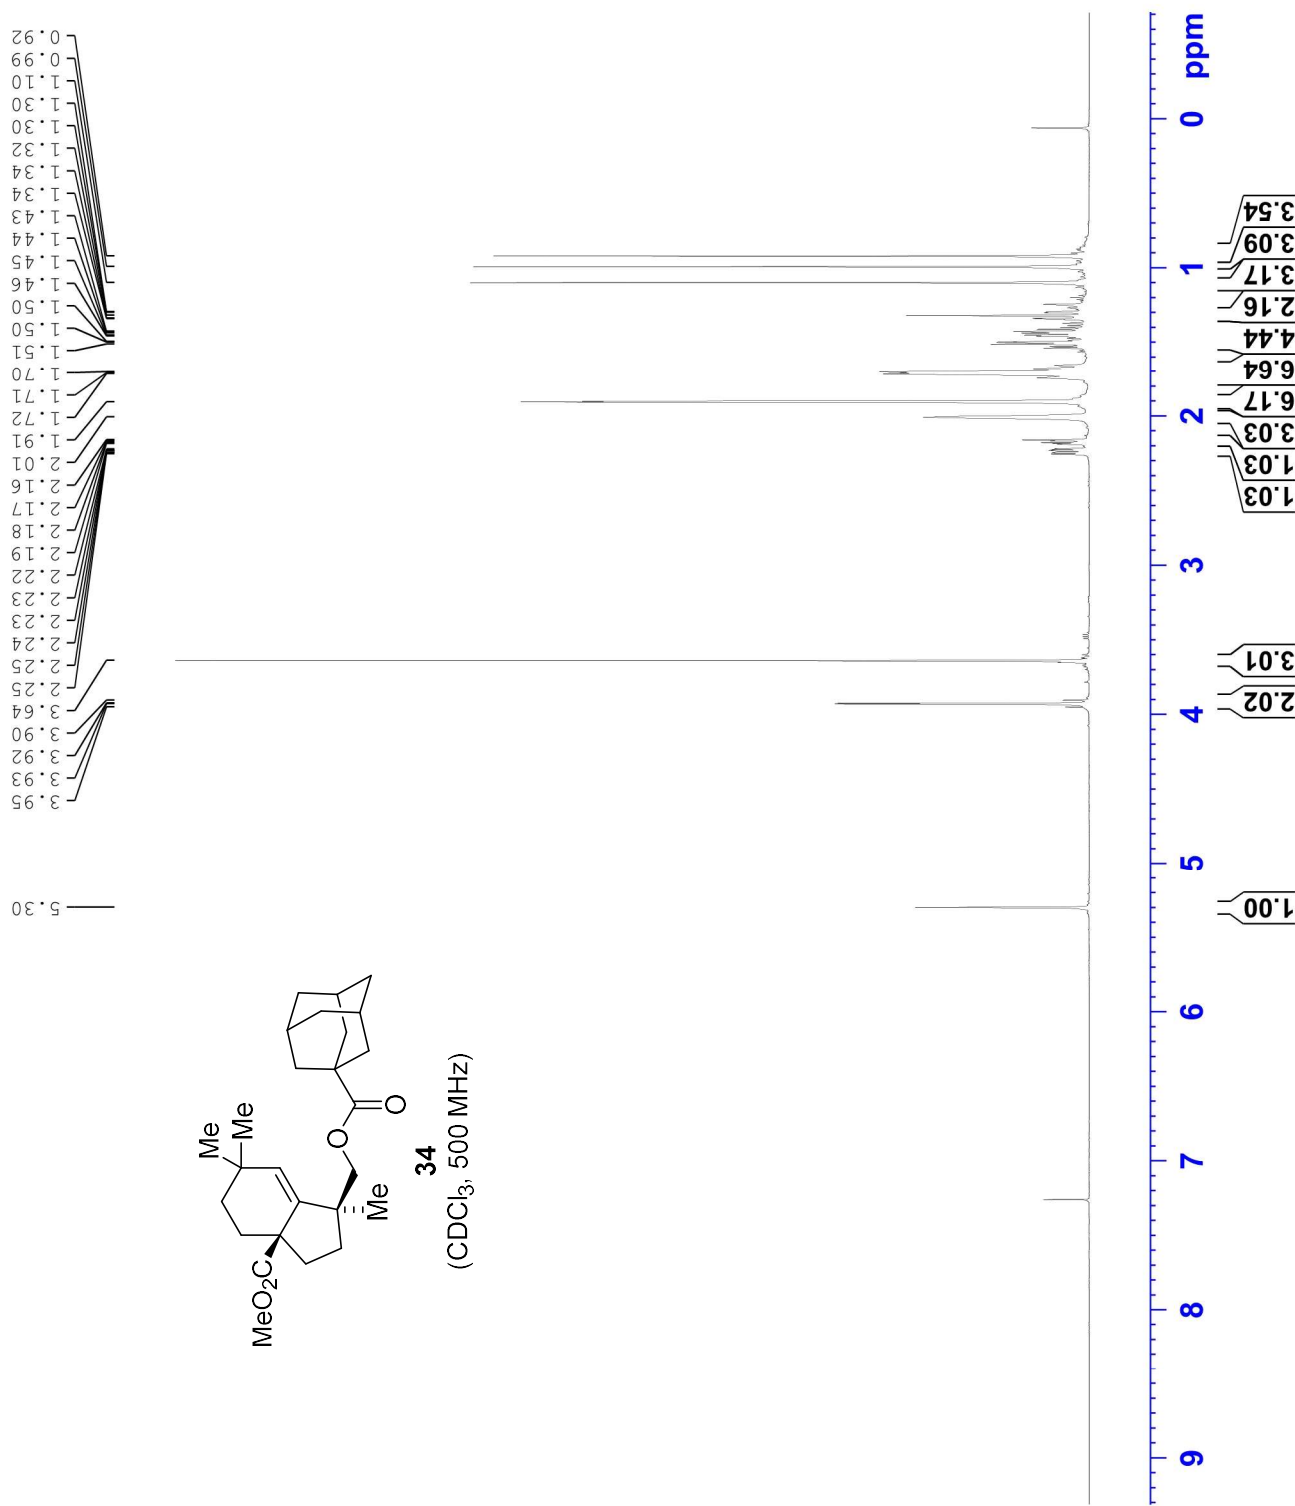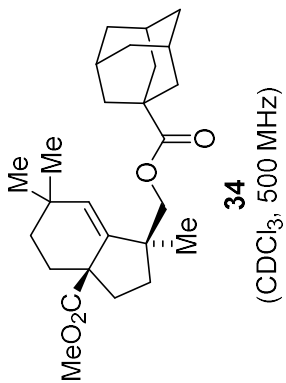

177.70  
176.82  
133.20  
143.96  
71.80  
55.45  
51.91  
44.25  
40.94  
38.99  
36.59  
35.77  
35.53  
34.72  
32.86  
31.88  
30.58  
29.58  
28.01  
26.03

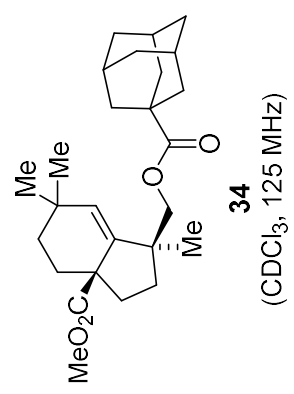

Current Data Parameters  
 NAME Yh-2-73-a  
 EXPNO 2  
 PROCNO 2

F2 - Acquisition Parameters  
 Date\_ 20180121  
 Time\_ 22.35  
 INSTRUM spect  
 PROBHD 5 mm PABBO BB/  
 PULPROG zgdc  
 TD 187496  
 SOLVENT CDC13  
 NS 7  
 DS 0  
 SWH 31250.000 Hz  
 FIDRES 0.166670 Hz  
 AQ 2.9999361 sec  
 RG 2050  
 DW 16.000 usec  
 DE 6.50 usec  
 TE 296.9 K  
 D1 3.0000000 sec  
 D11 0.0300000 sec  
 TD0 1

==== CHANNEL f1 =====  
 SFO1 125.7049802 MHz  
 NUC1 13C  
 P1 10.00 usec  
 PLW1 72.83999634 W

==== CHANNEL f2 =====  
 SFO2 499.8724993 MHz  
 NUC2 1H  
 CPDPRG[2] waltz16  
 PCPD2 80.00 usec  
 PLW2 19.00000000 W  
 PLW12 0.29688001 W

F2 - Processing parameters  
 SI 1048576  
 SF 125.6924115 MHz  
 EM  
 WDW 0  
 SSB 0  
 LB 0.30 Hz  
 GB 0  
 PC 1.40

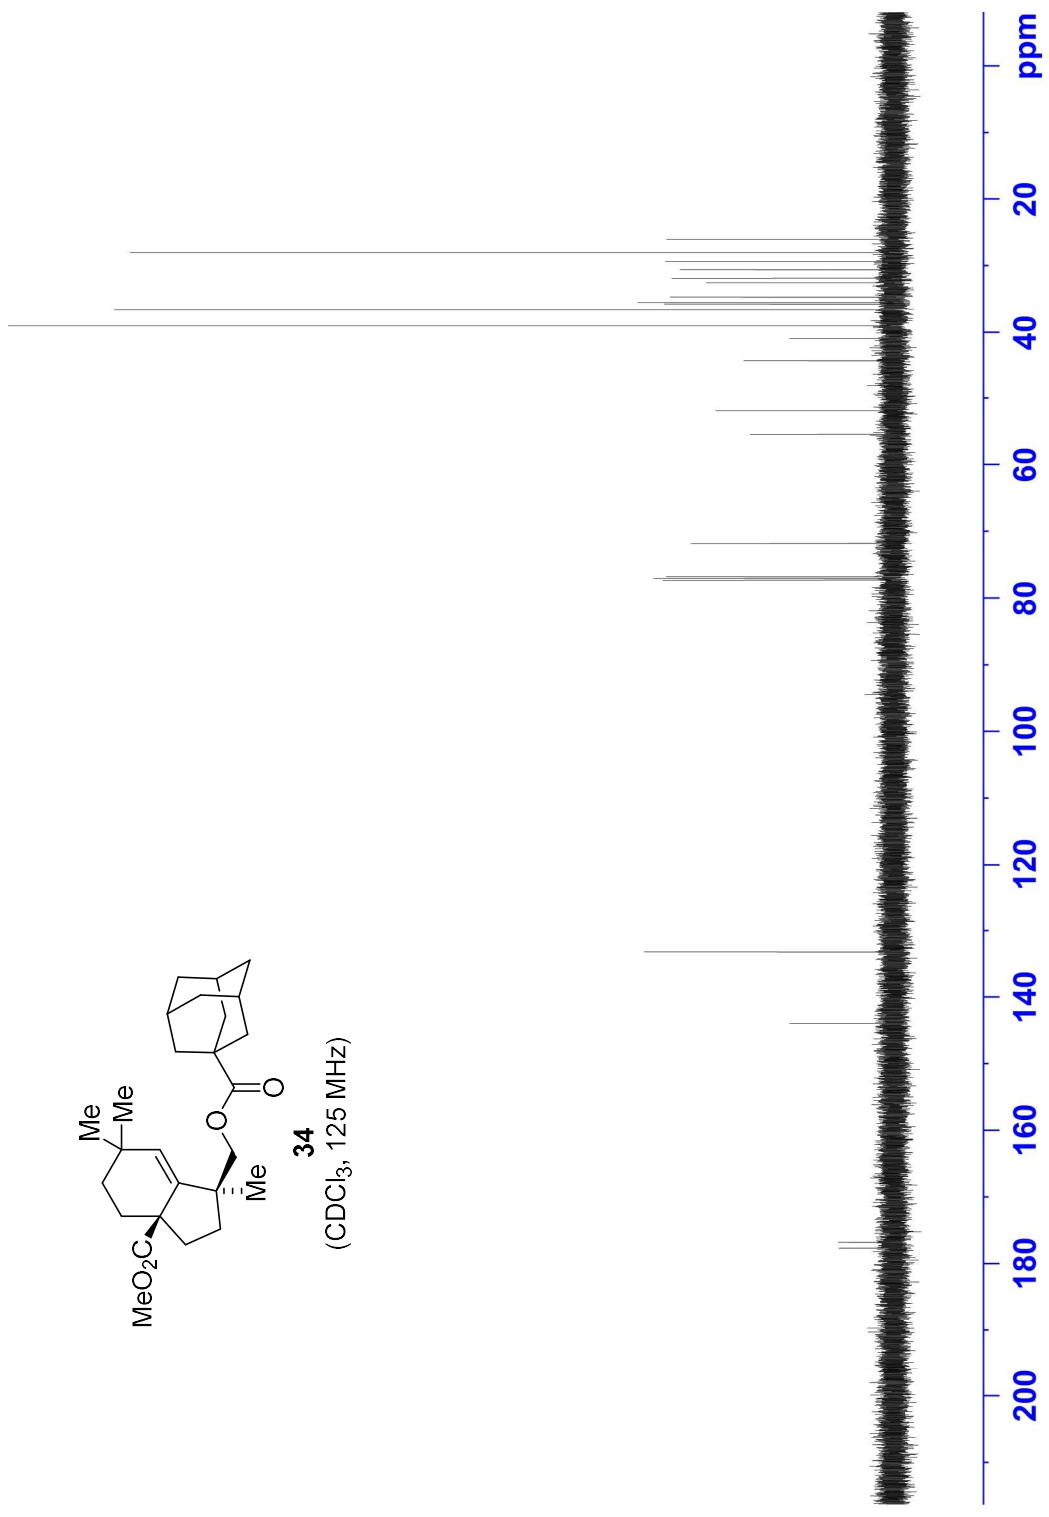

Current Data Parameters  
 NAME Yh-3-18-a  
 EXPNO 1  
 PROCNO 1

F2 - Acquisition Parameters  
 Date\_ 20180815  
 Time\_ 16.03  
 INSTRUM spect  
 PROBHD 5 mm PAQNP 1H/  
 PULPROG zg  
 TD 44998  
 SOLVENT CDC13  
 NS 1  
 DS 0  
 SWH 7500.000 Hz  
 FIDRES 0.166674 Hz  
 AQ 2.9998667 sec  
 RG 50.8  
 DW 66.667 usec  
 DE 71.43 usec  
 TE 294.5 K  
 D1 3.0000000 sec  
 TD0 1

==== CHANNEL f1 =====  
 NUC1 1H  
 P1 14.50 usec  
 PL1 0 dB  
 PL1W 24.54113007 W  
 SFO1 500.1330008 MHz

F2 - Processing parameters  
 SI 32768  
 SF 500.1300138 MHz  
 WDW EM  
 SSB 0  
 LB 0.30 Hz  
 GB 0  
 PC 1.00

3.96  
3.94  
3.93  
3.91  
3.64  
2.25  
2.24  
2.24  
2.24  
2.24  
2.23  
2.23  
2.23  
2.22  
2.22  
2.21  
2.19  
2.19  
2.18  
2.17  
2.16  
2.16  
2.16  
1.51  
1.51  
1.51  
1.50  
1.50  
1.49  
1.49  
1.49  
1.46  
1.45  
1.45  
1.44  
1.43  
1.37  
1.34  
1.34  
1.34  
1.34  
1.33  
1.33  
1.33  
1.29

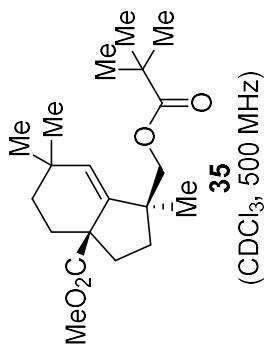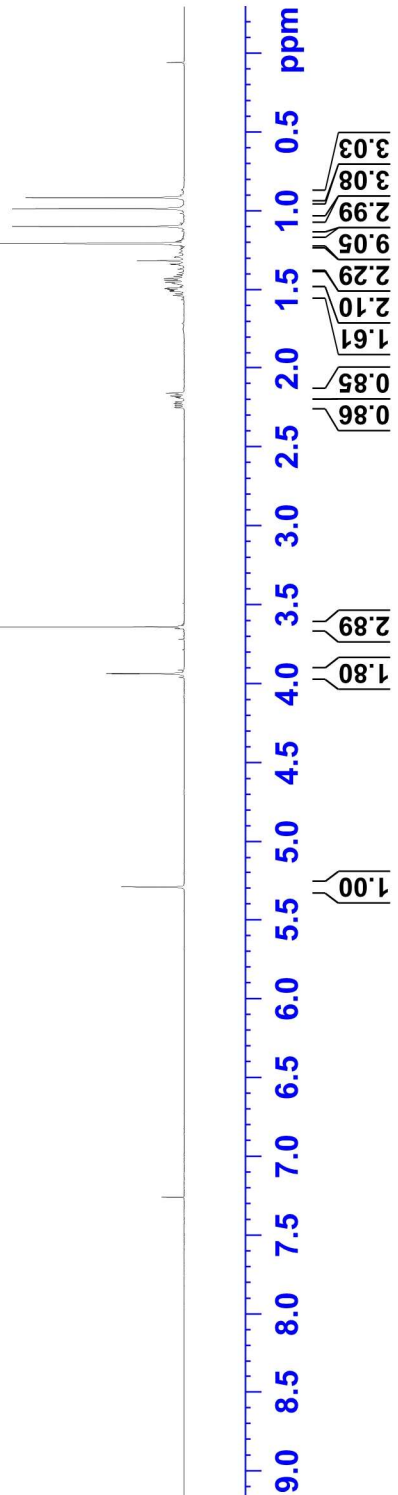

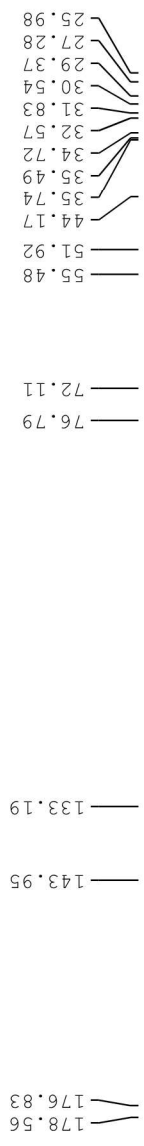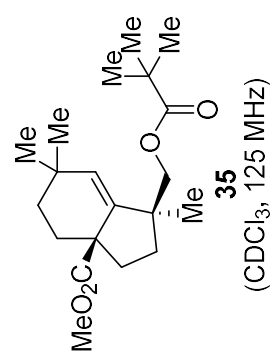

Current Data Parameters  
 NAME yh-3-18-a  
 EXPNO 2  
 PROCNO 2

F2 - Acquisition Parameters  
 Date\_ 20180815  
 Time 16.16  
 INSTRUM spect  
 PROBHD 5 mm PAQNP 1H/  
 PULPROG zgpg  
 TD 197364  
 SOLVENT CDC13  
 NS 15  
 DS 0  
 SWH 32894.738 Hz  
 FIDRES 0.166670 Hz  
 AQ 2.9999328 sec  
 RG 2050  
 DW 15.200 usec  
 DE 6.00 usec  
 TE 295.0 K  
 D1 10.00000000 sec  
 D11 0.03000000 sec  
 TD0 1

==== CHANNEL f1 =====  
 NUC1 13C  
 P1 9.90 usec  
 PL1 1.00 dB  
 PL1W 72.42802429 W  
 SFO1 125.7716224 MHz

==== CHANNEL f2 =====  
 CPDPRG[2] waltz16  
 NUC2 1H  
 PCPD2 80.00 usec  
 PL2 0 dB  
 PL12 16.50 dB  
 PL13 17.00 dB  
 PL2W 24.54113007 W  
 PL12W 0.54940748 W  
 PL13W 0.48965994 W  
 SFO2 500.1325006 MHz

F2 - Processing parameters  
 SI 131072  
 SF 125.7577890 MHz  
 WDW EM  
 SSB 0  
 LB 0.30 Hz  
 GB 0  
 PC 1.40

Current Data Parameters  
 NAME yh-2-143-a  
 EXPNO 1  
 PROCNO 1

F2 - Acquisition Parameters

Date\_ 20180419  
 Time\_ 20.41  
 INSTRUM spect  
 PROBHD 5 mm PAQNP 1H/  
 PULPROG zg  
 TD 44998  
 SOLVENT CDC13  
 NS 8  
 DS 0  
 SWH 7500.000 Hz  
 FIDRES 0.166674 Hz  
 AQ 2.9998667 sec  
 RG 181  
 DW 66.667 usec  
 DE 71.43 usec  
 TE 295.1 K  
 D1 3.0000000 sec  
 TD0 1

==== CHANNEL f1 =====  
 NUC1 1H  
 P1 12.00 usec  
 PL1 0 dB  
 PL1W 24.54113007 W  
 SFO1 500.1330008 MHz

F2 - Processing parameters  
 SI 16384  
 SF 500.1300133 MHz  
 WDW EM  
 SSB 0  
 LB 0.30 Hz  
 GB 0  
 PC 1.00

4.20  
4.18  
4.17  
4.15  
3.65  
2.28  
2.27  
2.26  
2.25  
2.21  
2.21  
2.19  
2.19  
1.63  
1.62  
1.60  
1.59  
1.56  
1.55  
1.52  
1.49  
1.48  
1.47  
1.46  
1.46  
1.45  
1.44  
1.42  
1.36  
1.35  
1.33  
1.31

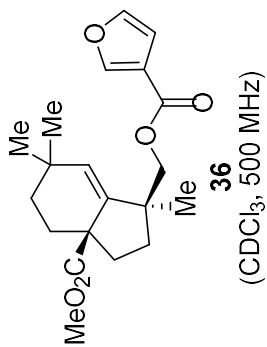

8.01  
8.01  
7.43  
6.75  
6.75  
5.32

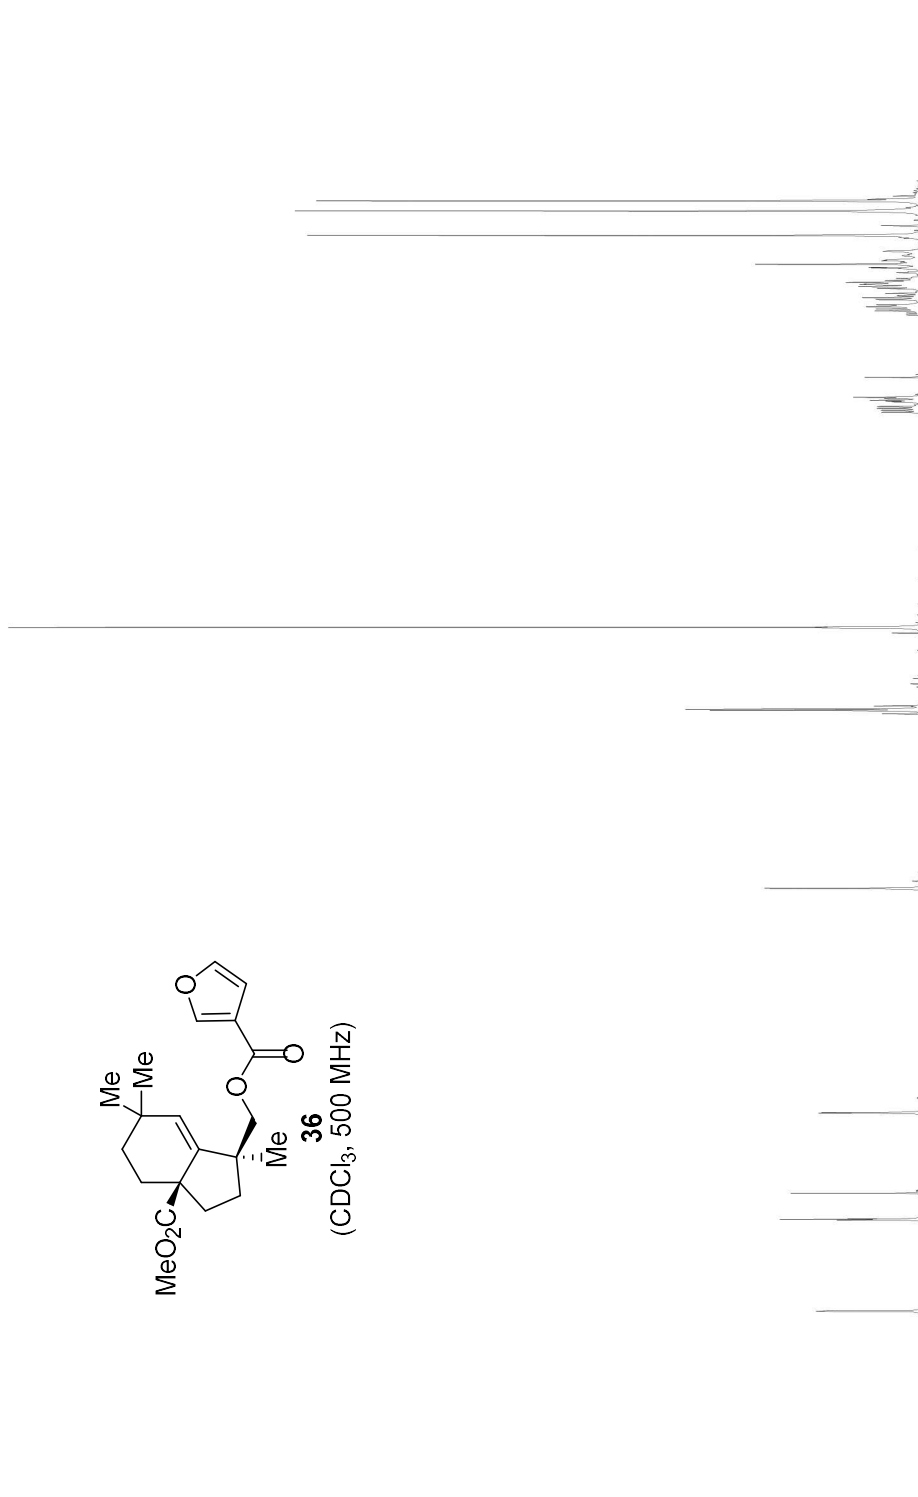

9.0 8.5 8.0 7.5 7.0 6.5 6.0 5.5 5.0 4.5 4.0 3.5 3.0 2.5 2.0 1.5 1.0 0.5 ppm

0.70  
0.68  
0.67  
0.93  
1.90  
3.11  
1.00  
1.06  
0.13  
1.42  
1.03  
2.29  
2.53  
3.10  
3.65  
3.33

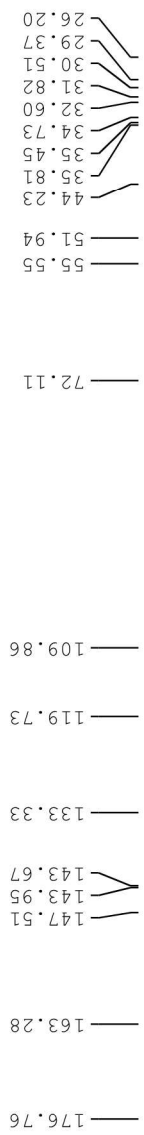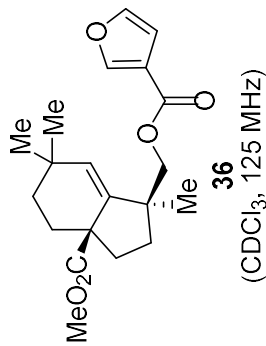

Current Data Parameters  
 NAME yh-2-143-a  
 EXPNO 2  
 PROCNO 2

F2 - Acquisition Parameters  
 Date\_ 20180419  
 Time\_ 20.58  
 INSTRUM spect  
 PROBHD 5 mm PAQNP 1H/  
 PULPROG zgpg  
 TD 197364  
 SOLVENT CDC13  
 NS 27  
 DS 4  
 SWH 32894.738 Hz  
 FIDRES 0.166670 Hz  
 AQ 2.9999328 sec  
 RG 2050  
 DW 15.200 usec  
 DE 6.00 usec  
 TE 295.6 K  
 D1 10.00000000 sec  
 D11 0.03000000 sec  
 TDO 1

==== CHANNEL f1 =====  
 NUC1 13C  
 P1 8.00 usec  
 PL1 1.00 dB  
 PL1W 72.42802429 W  
 SFO1 125.7716224 MHz

==== CHANNEL f2 =====  
 CPDPRG[2] waltz16  
 NUC2 1H  
 PCPD2 80.00 usec  
 PL2 0 dB  
 PL12 16.50 dB  
 PL13 17.00 dB  
 PL2W 24.54113007 W  
 PL12W 0.54940748 W  
 PL13W 0.48965994 W  
 SFO2 500.1325006 MHz

F2 - Processing parameters  
 SI 131072  
 SF 125.7577890 MHz  
 WDW EM  
 SSB 0  
 LB 0.30 Hz  
 GB 0  
 PC 1.40

Current Data Parameters  
 NAME Yh-2-63-a  
 EXPNO 1  
 PROCNO 1

F2 - Acquisition Parameters

Date\_ 20180110  
 Time\_ 21.27  
 INSTRUM spect  
 PROBHD 5 mm PABBO BB/  
 PULPROG zg  
 TD 59998  
 SOLVENT CDC13  
 NS 2  
 DS 0  
 SWH 10000.000 Hz  
 FIDRES 0.166672 Hz  
 AQ 2.9999001 sec  
 RG 37.92  
 DW 50.000 usec  
 DE 6.50 usec  
 TE 296.7 K  
 D1 3.0000000 sec  
 TD0 1

==== CHANNEL f1 =====  
 SFO1 499.8730869 MHz  
 NUC1 1H  
 P1 10.75 usec  
 PLW1 18.2500000 W

F2 - Processing parameters  
 SI 65536  
 SF 499.8700123 MHz  
 EM  
 WDW 0  
 SSB 0  
 LB 0.30 Hz  
 GB 0  
 PC 1.00

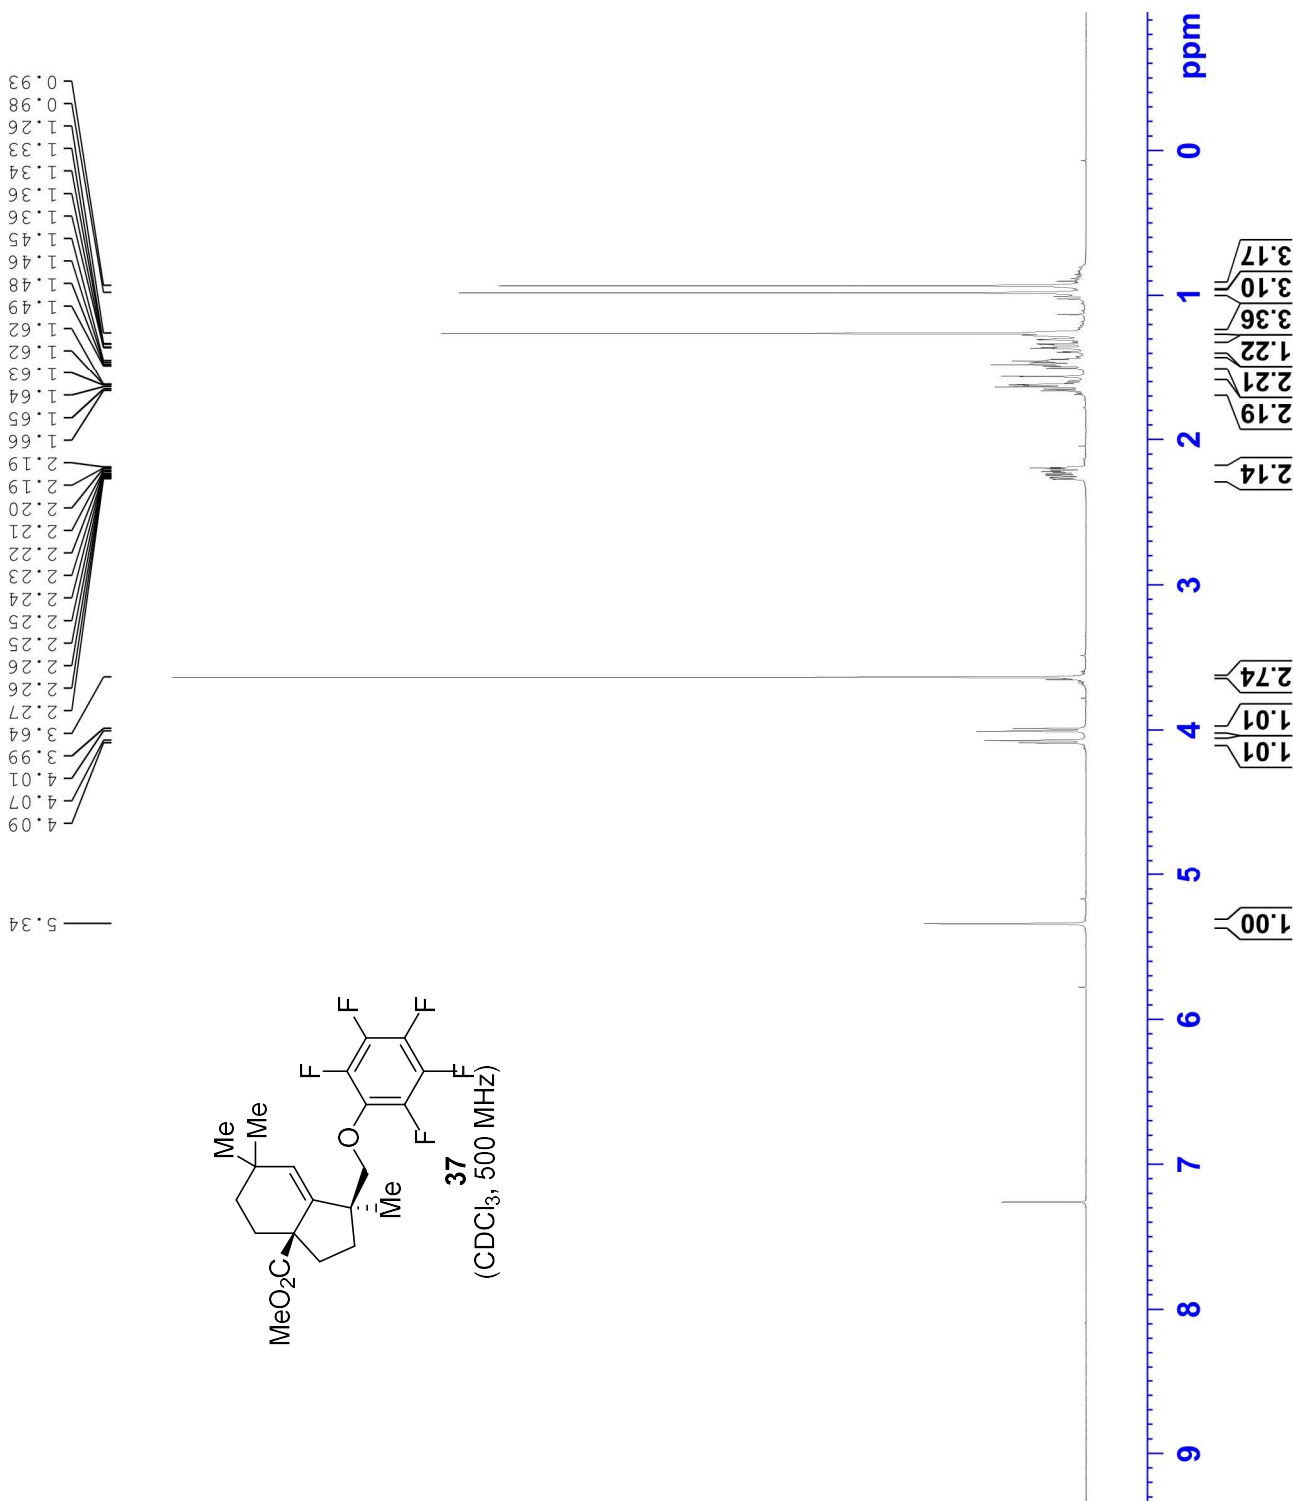

Current Data Parameters  
 NAME Yh-2-63-a  
 EXPNO 2  
 PROCNO 2

F2 - Acquisition Parameters  
 Date\_ 20180111  
 Time\_ 0.59  
 INSTRUM spect  
 PROBHD 5 mm PABBO BB/  
 PULPROG zgdc  
 TD 187496  
 SOLVENT CDC13  
 NS 2048  
 DS 0  
 SWH 31250.000 Hz  
 FIDRES 0.166670 Hz  
 AQ 2.9999361 sec  
 RG 2050  
 DW 16.000 usec  
 DE 6.50 usec  
 TE 298.7 K  
 D1 3.0000000 sec  
 D11 0.0300000 sec  
 TD0 1

==== CHANNEL f1 =====  
 SFO1 125.7049802 MHz  
 NUC1 13C  
 P1 10.00 usec  
 PLW1 72.83999634 W

==== CHANNEL f2 =====  
 SFO2 499.8724993 MHz  
 NUC2 1H  
 CPDPRG[2] waltz16  
 PCPD2 80.00 usec  
 PLW2 19.00000000 W  
 PLW12 0.29688001 W

F2 - Processing parameters  
 SI 1048576  
 SF 125.6924115 MHz  
 WDW EM  
 SSB 0  
 LB 0.30 Hz  
 GB 0  
 PC 1.40

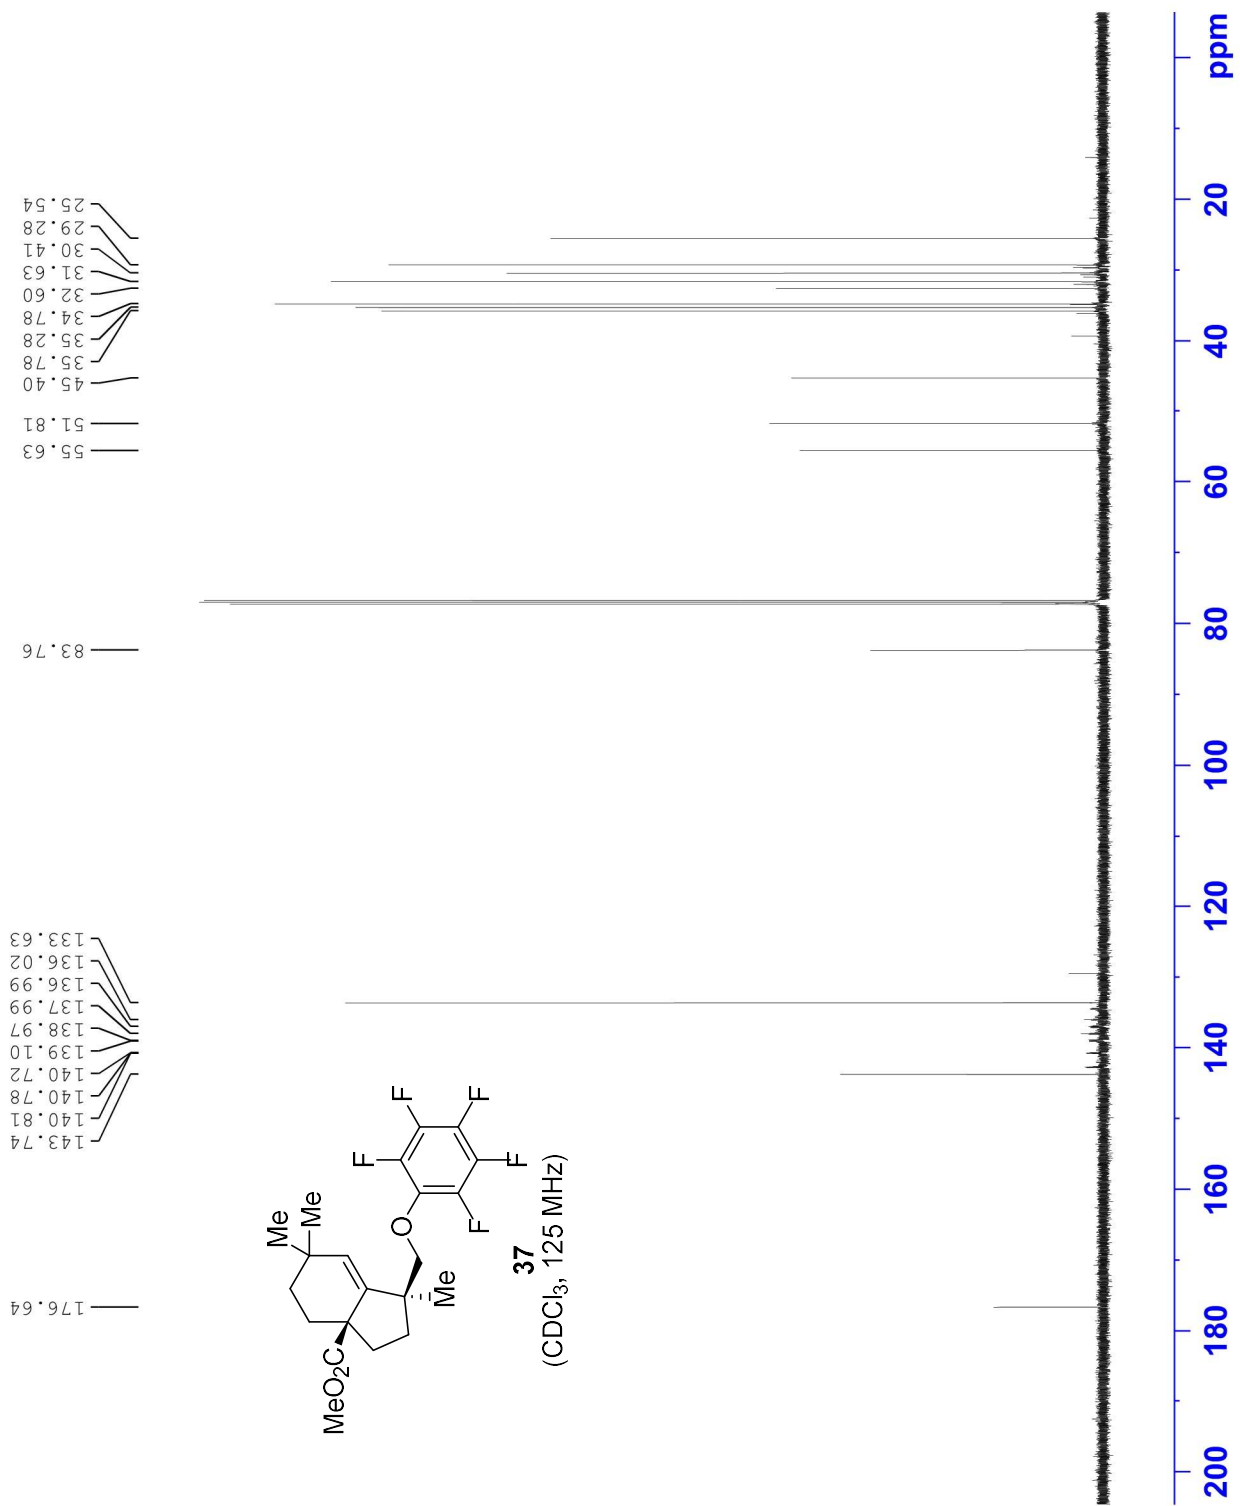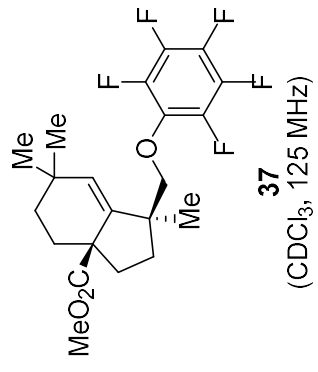



Current Data Parameters  
 NAME Yh-7-27-b  
 EXPNO 1  
 PROCNO 1

F2 - Acquisition Parameters

Date\_ 20190930  
 Time\_ 15.25  
 INSTRUM spect  
 PROBHD 5 mm PABBO BB/  
 PULPROG zg  
 TD 59998  
 SOLVENT CDC13  
 NS 4  
 DS 0  
 SWH 10000.000 Hz  
 FIDRES 0.166672 Hz  
 AQ 2.9999001 sec  
 RG 70.49  
 DW 50.000 usec  
 DE 6.50 usec  
 TE 298.0 K  
 D1 4.0000000 sec  
 TD0 1

==== CHANNEL f1 =====  
 SFO1 499.8730869 MHz  
 NUC1 1H  
 P1 3.58 usec  
 PLW1 18.25000000 W

F2 - Processing parameters  
 SI 65536  
 SF 499.8700109 MHz  
 EM  
 WDW 0  
 SSB 0  
 LB 0.30 Hz  
 GB 0  
 PC 1.00

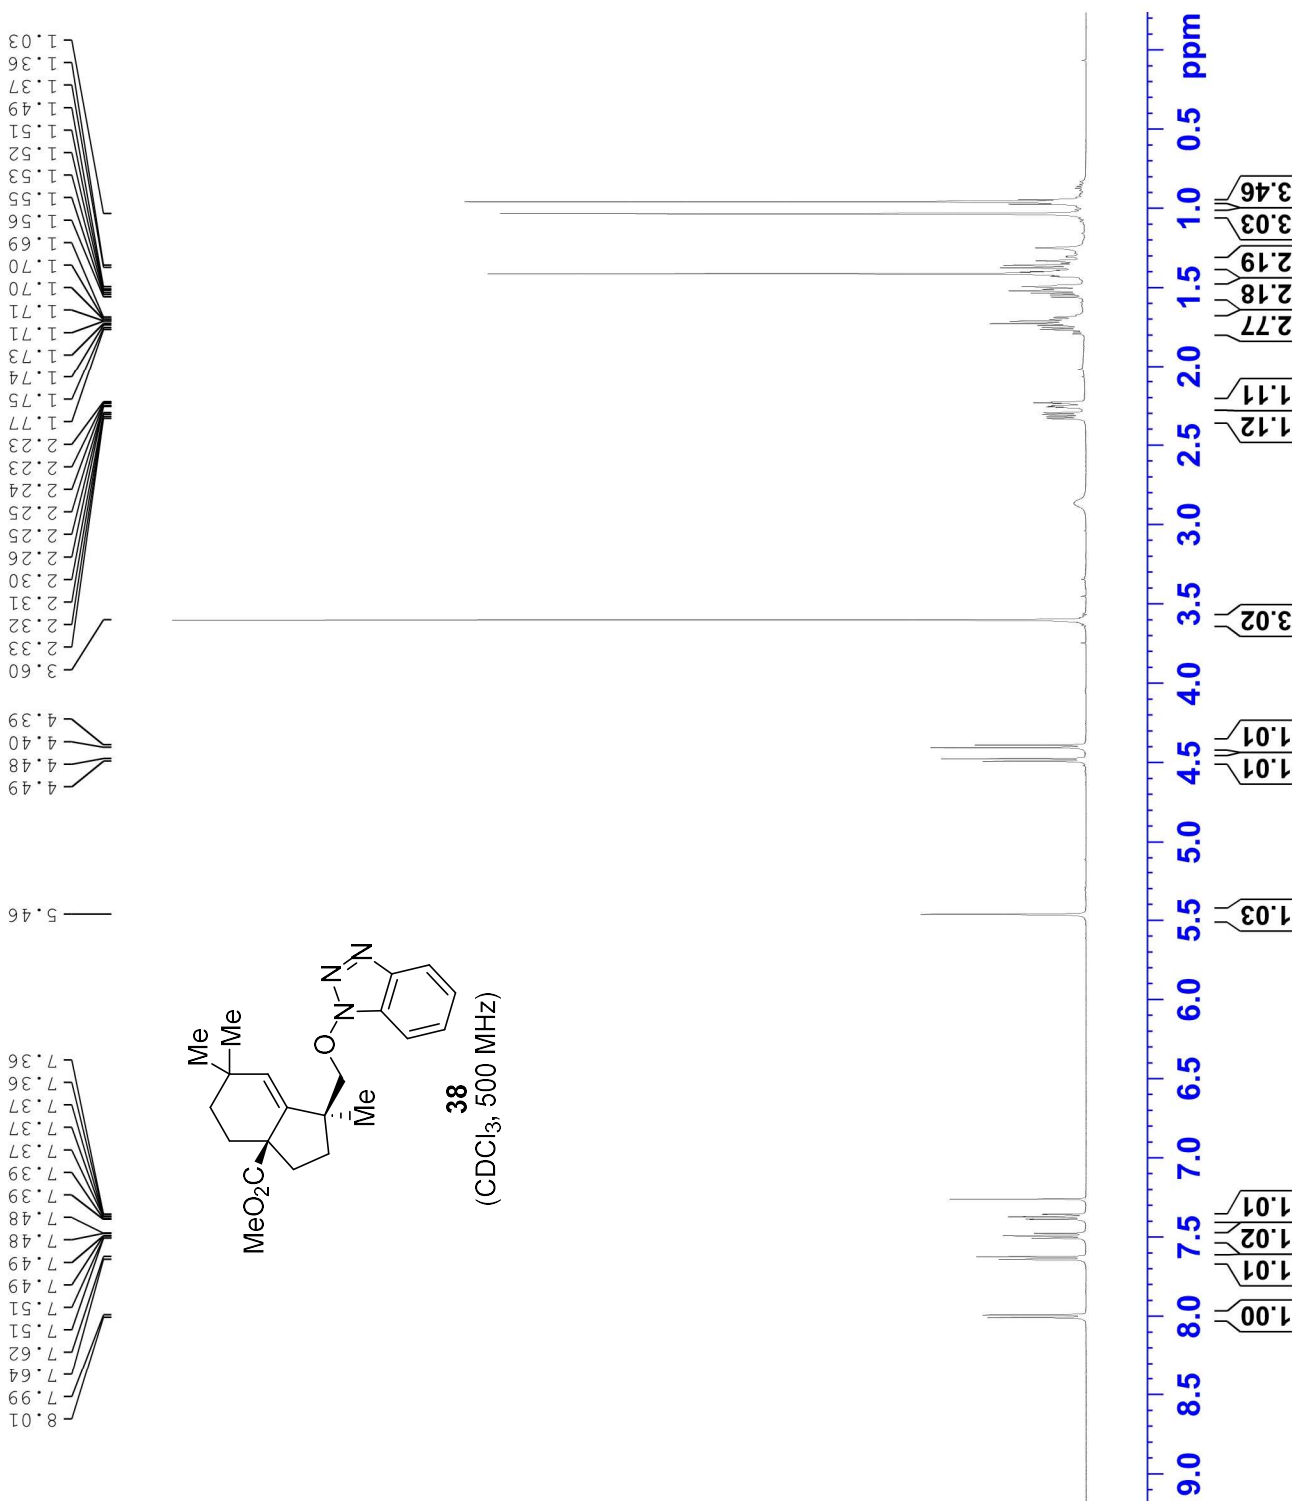

```

Current Data Parameters
NAME      Yh-7-27-b
EXPNO    2
PROCNO   2

F2 - Acquisition Parameters
Date_     20190930
Time_     16.10
INSTRUM   spect
PROBHD    5 mm PABBO BB/
PULPROG   zgdc
TD         187496
SOLVENT   CDCl3
NS         67
DS         0
SWH        31250.000 Hz
FIDRES     0.166670 Hz
AQ         2.9999361 sec
RG         2050
DW         16.000 usec
DE         6.50 usec
TE         298.0 K
D1         3.00000000 sec
D11        0.03000000 sec
TD0        1

===== CHANNEL f1 =====
SFO1      125.7049802 MHz
NUC1       13C
P1         10.00 usec
PLW1      72.83999634 W

===== CHANNEL f2 =====
SFO2      499.8724993 MHz
NUC2       1H
CPDPRG[2] waltz16
PCPD2     80.00 usec
PLW2      19.00000000 W
PLW12     0.29688001 W

F2 - Processing parameters
SI         1048576
SF         125.6924115 MHz
WDW        EM
SSB        0
LB         0.30 Hz
GB         0
PC         1.40

```

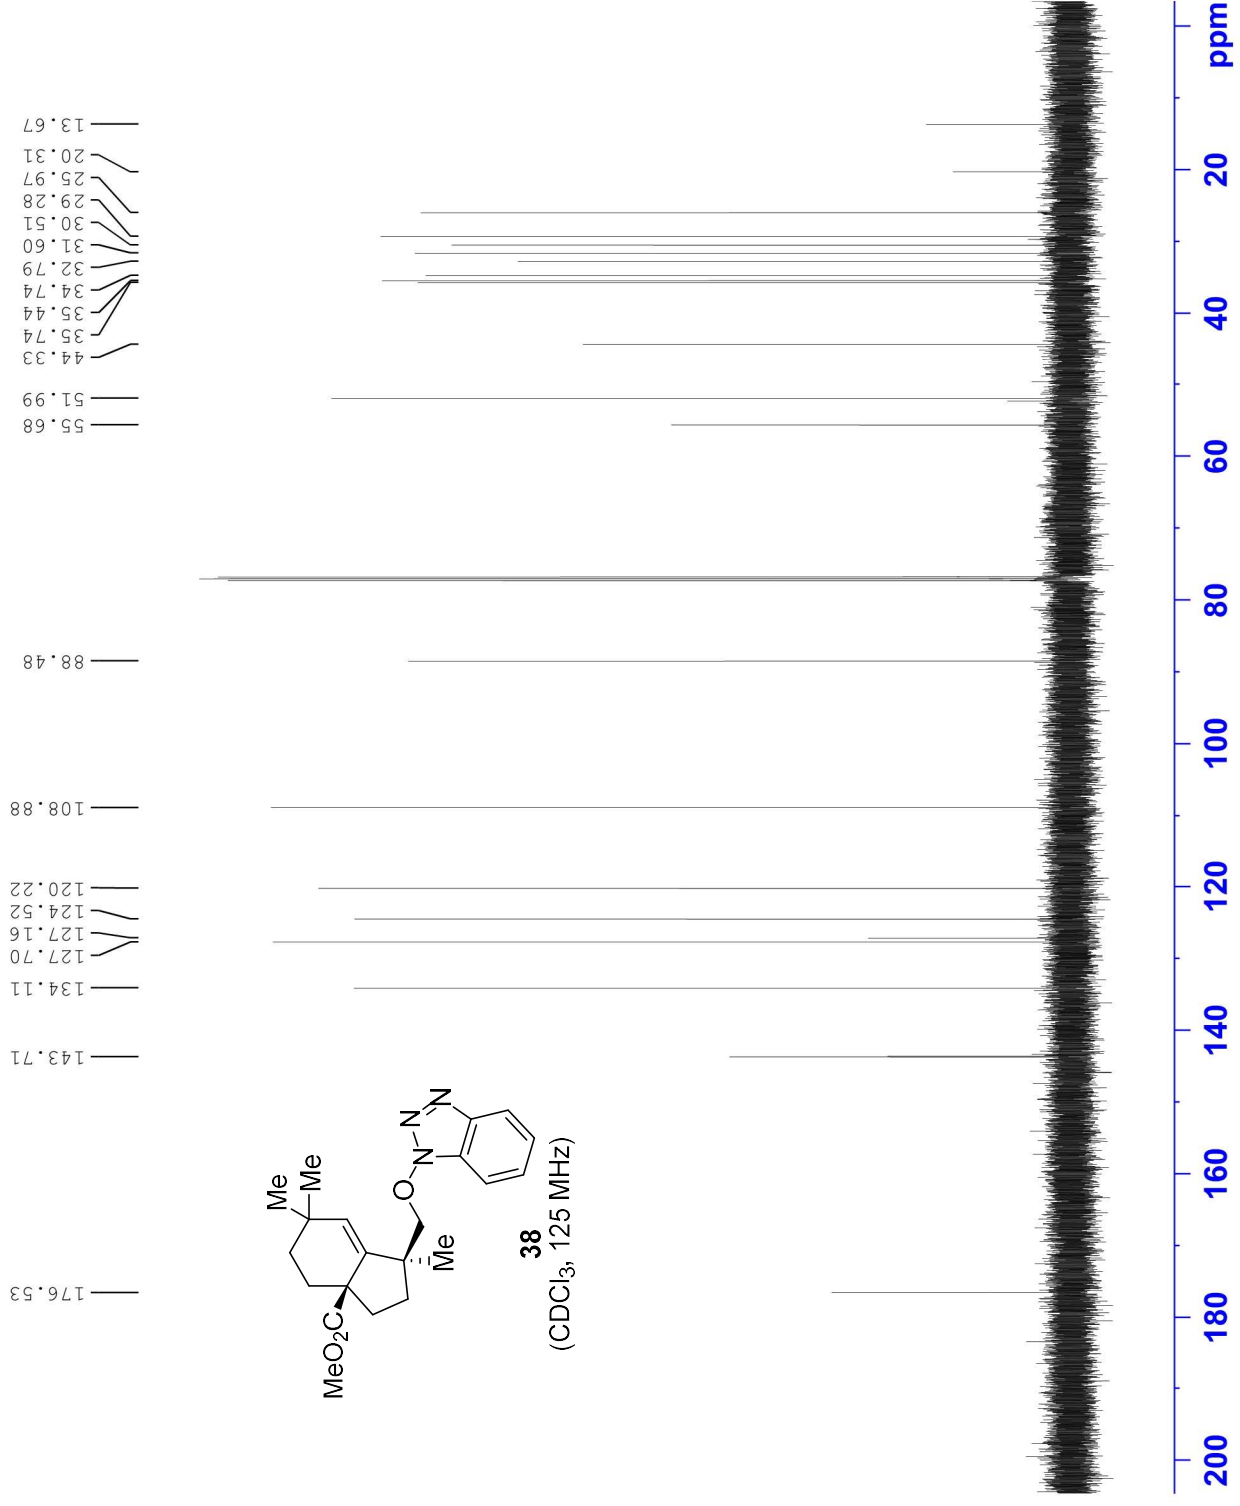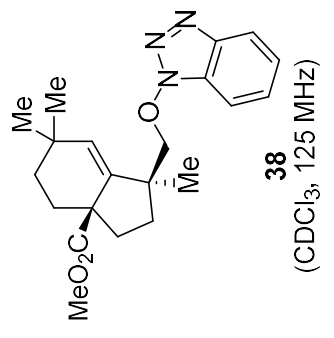

Current Data Parameters  
 NAME Yh-5-46-f  
 EXPNO 1  
 PROCNO 1

F2 - Acquisition Parameters

Date\_ 20180731  
 Time\_ 20.07  
 INSTRUM spect  
 PROBHD 5 mm PATXI 1H/  
 PULPROG zg  
 TD 59998  
 SOLVENT CDC13  
 NS 3  
 DS 0  
 SWH 10000.000 Hz  
 FIDRES 0.166672 Hz  
 AQ 2.9999001 sec  
 RG 196.79  
 DW 50.000 usec  
 DE 10.00 usec  
 TE 294.1 K  
 D1 3.0000000 sec  
 TD0 1

==== CHANNEL f1 =====  
 SFO1 500.1330885 MHz  
 NUC1 1H  
 P1 2.67 usec  
 PLW1 12.19999981 W

F2 - Processing parameters  
 SI 65536  
 SF 500.1300138 MHz  
 EM  
 WDW 0  
 SSB 0.30 Hz  
 LB 0  
 GB 0  
 PC 1.00

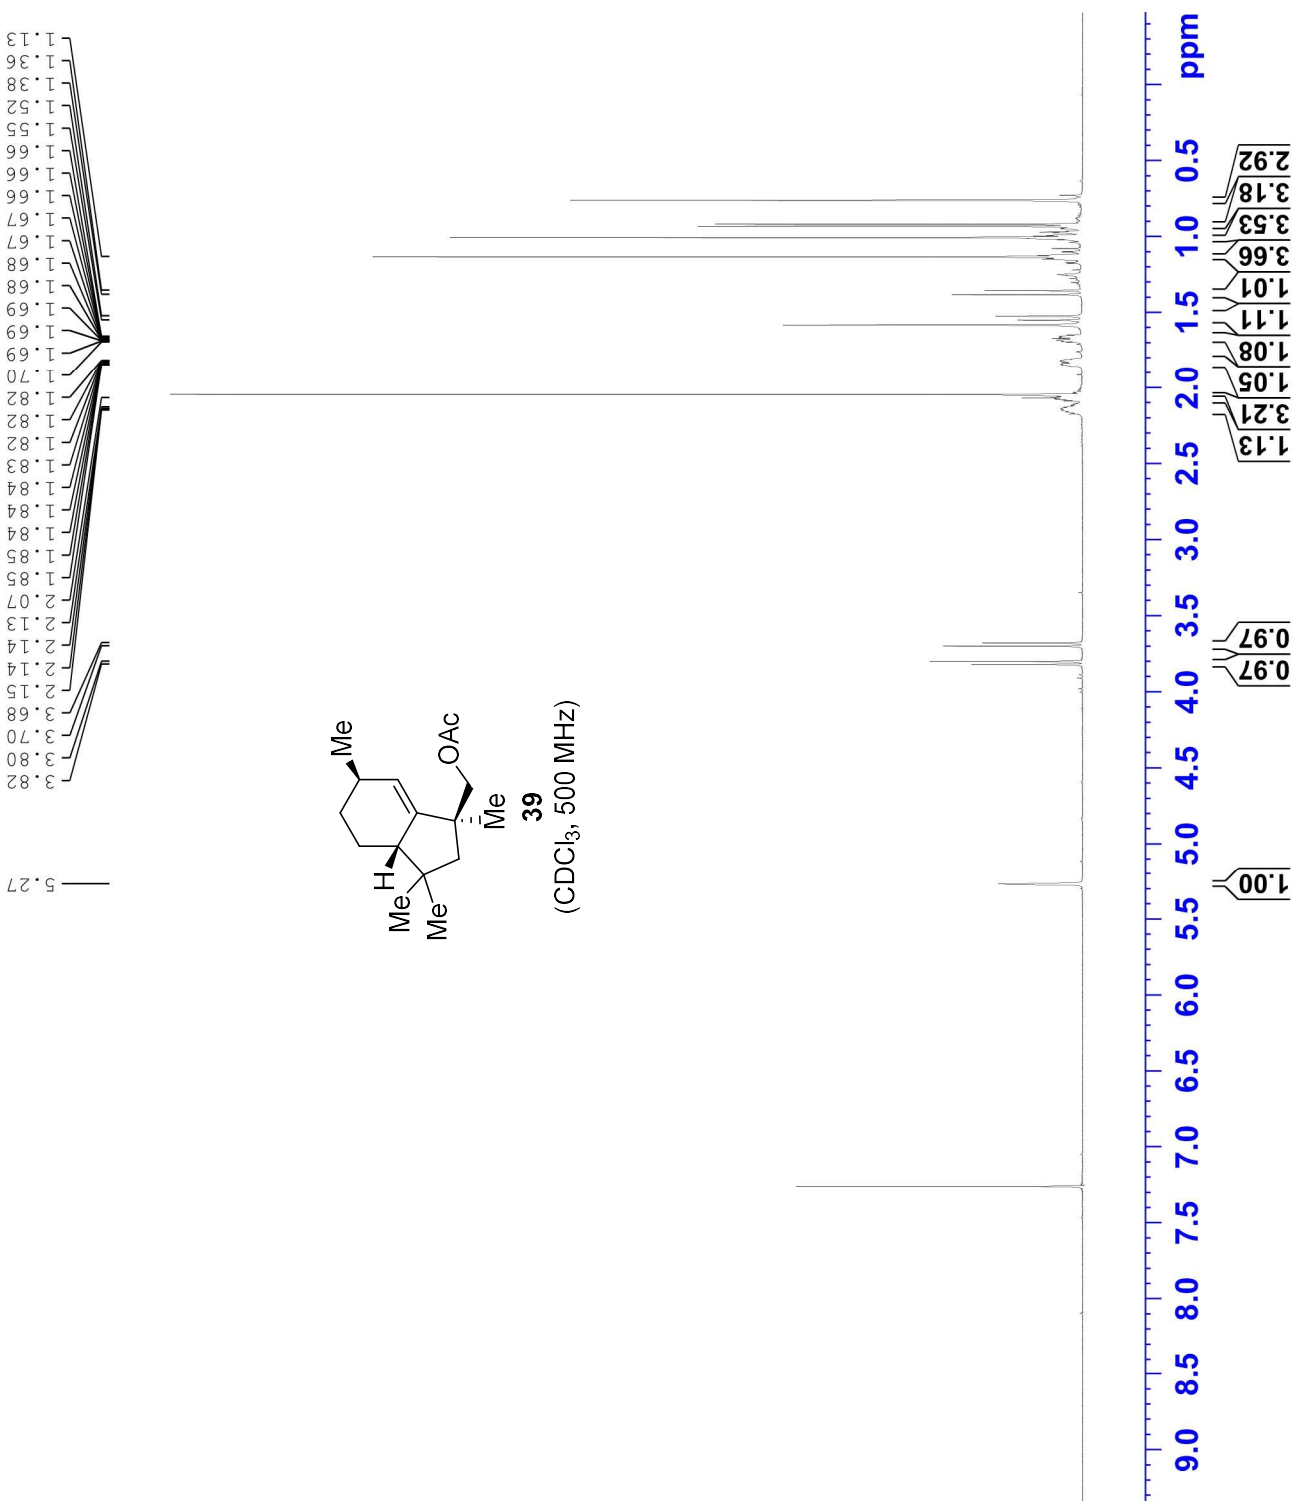

171.50  
 148.17  
 125.68  
 73.53  
 52.11  
 51.04  
 42.50  
 39.38  
 31.96  
 31.17  
 28.16  
 24.42  
 23.85  
 22.98  
 22.26  
 21.05

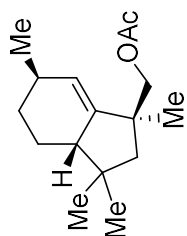

**39**  
 (CDCl<sub>3</sub>, 125 MHz)

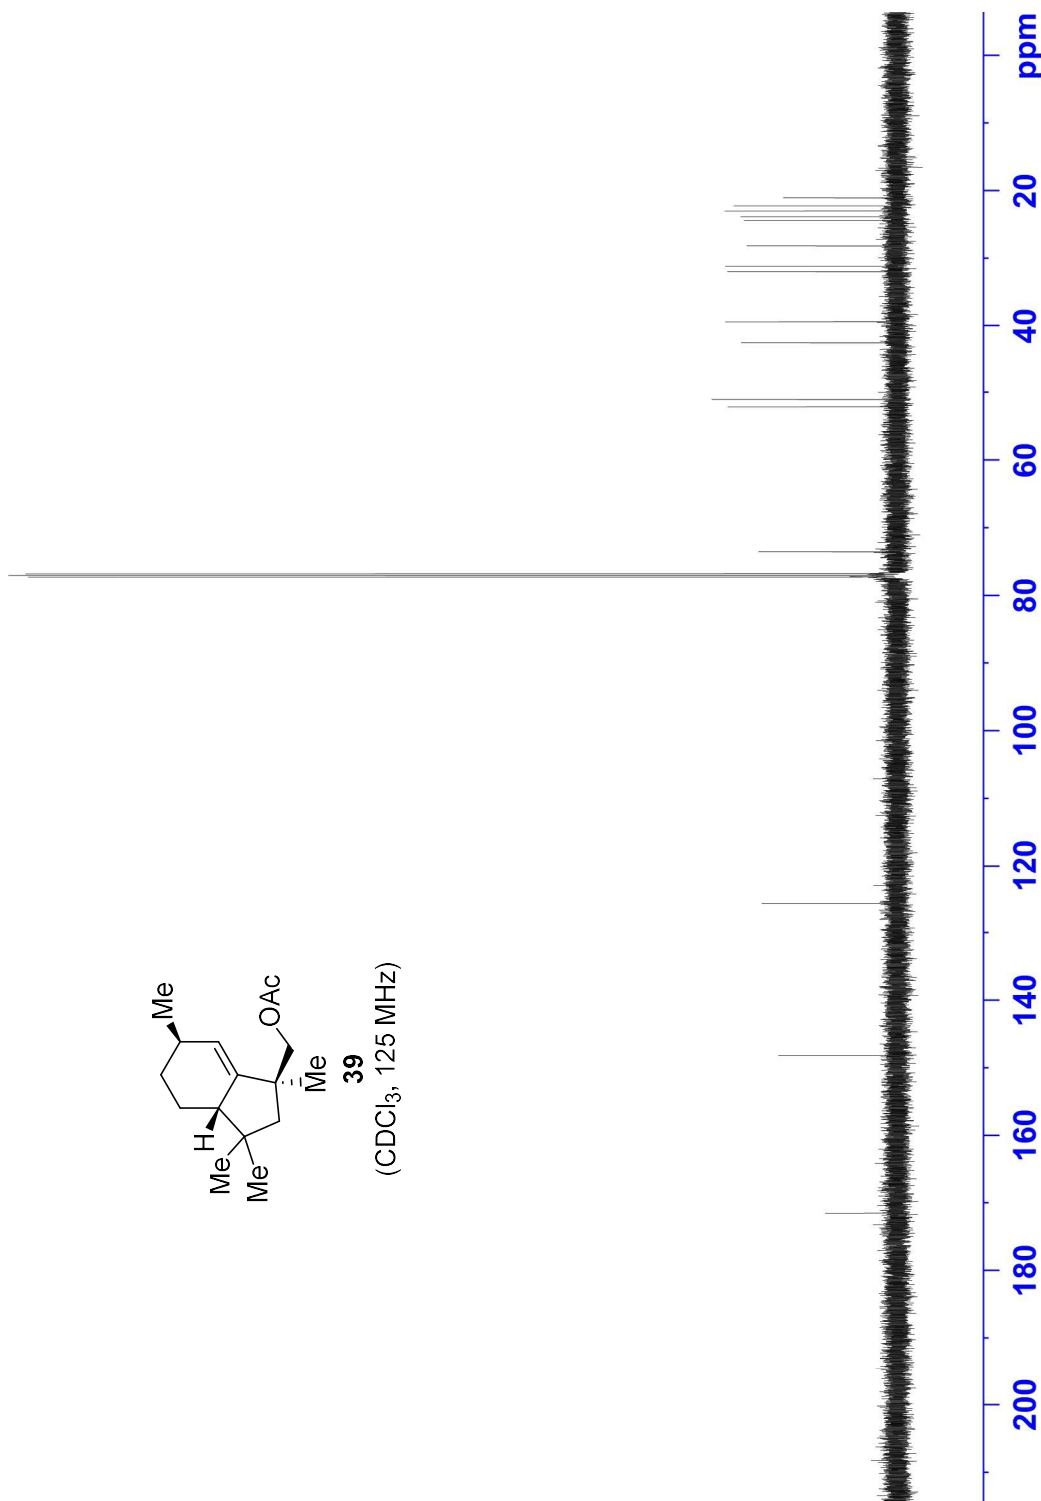

Current Data Parameters  
 NAME yh-5-46-r  
 EXPNO 2  
 PROCNO 2

F2 - Acquisition Parameters  
 Date\_ 20180731  
 Time 20.37  
 INSTRUM spect  
 PROBHD 5 mm PAQNP 1H/  
 PULPROG zgpg  
 TD 197364  
 SOLVENT CDC13  
 NS 41  
 DS 4  
 SWH 32894.738 Hz  
 FIDRES 0.166670 Hz  
 AQ 2.9999328 sec  
 RG 2050  
 DW 15.200 usec  
 DE 6.00 usec  
 TE 292.6 K  
 D1 10.00000000 sec  
 D11 0.03000000 sec  
 TD0 1

===== CHANNEL f1 =====  
 NUC1 13C  
 P1 8.00 usec  
 PL1 1.00 dB  
 PL1W 72.42802429 W  
 SFO1 125.7716224 MHz

===== CHANNEL f2 =====  
 CPDPRG[2] waltz16  
 NUC2 1H  
 PCPD2 80.00 usec  
 PL2 0 dB  
 PL12 16.50 dB  
 PL13 17.00 dB  
 PL2W 24.54113007 W  
 PL12W 0.54940748 W  
 PL13W 0.48965994 W  
 SFO2 500.1325006 MHz

F2 - Processing parameters  
 SI 131072  
 SF 125.7577890 MHz  
 WDW EM  
 SSB 0  
 LB 0.30 Hz  
 GB 0  
 PC 1.40

Current Data Parameters  
 NAME 5-member-ring  
 EXPNO 1  
 PROCNO 1

F2 - Acquisition Parameters

Date\_ 20190812  
 Time\_ 11.28  
 INSTRUM spect  
 PROBHD 5 mm PATXI 1H/  
 PULPROG zg  
 TD 59998  
 SOLVENT CDC13  
 NS 6  
 DS 0  
 SWH 10000.000 Hz  
 FIDRES 0.166672 Hz  
 AQ 2.9999001 sec  
 RG 196.79  
 DW 50.000 usec  
 DE 10.00 usec  
 TE 294.4 K  
 D1 4.0000000 sec  
 TD0 1

==== CHANNEL f1 =====  
 SFO1 500.1330885 MHz  
 NUC1 1H  
 P1 3.30 usec  
 PLW1 12.19999981 W

F2 - Processing parameters  
 SI 65536  
 SF 500.1300138 MHz  
 WDW EM  
 SSB 0  
 LB 0.30 Hz  
 GB 0  
 PC 1.00

1.10  
1.14  
1.42  
1.44  
1.66  
1.67  
1.68  
1.70  
1.73  
1.77  
1.87  
1.88  
1.89  
1.91  
1.93  
2.06  
2.15  
2.23  
2.24  
2.25  
2.26  
3.69  
3.99  
4.01

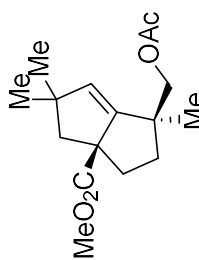

**40**  
 (CDCl<sub>3</sub>, 500 MHz)

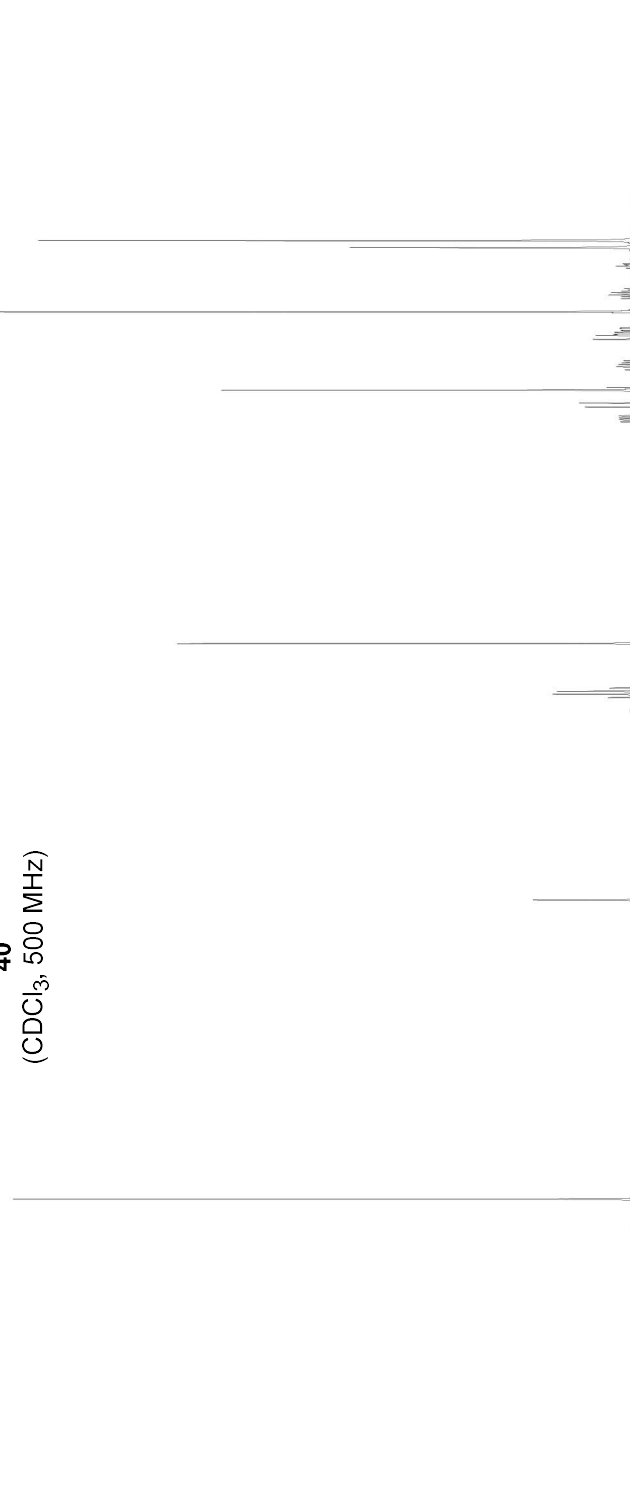

9.0 8.5 8.0 7.5 7.0 6.5 6.0 5.5 5.0 4.5 4.0 3.5 3.0 2.5 2.0 1.5 1.0 0.5 ppm

5.97  
3.19  
1.30  
2.10  
1.13  
2.89  
1.02  
0.99

Current Data Parameters  
 NAME 5-member-ring  
 EXPNO 2  
 PROCNO 2

F2 - Acquisition Parameters

Date\_ 20190812  
 Time\_ 21.07  
 INSTRUM spect  
 PROBHD 5 mm PABBO BB/  
 PULPROG zgdc  
 TD 187496  
 SOLVENT CDC13  
 NS 15  
 DS 0  
 SWH 31250.000 Hz  
 FIDRES 0.166670 Hz  
 AQ 2.9999361 sec  
 RG 2050  
 DW 16.000 usec  
 DE 6.50 usec  
 TE 294.5 K  
 D1 3.0000000 sec  
 D11 0.0300000 sec  
 TD0 1

==== CHANNEL f1 =====  
 SFO1 125.7049802 MHz  
 NUC1 13C  
 P1 10.00 usec  
 PLW1 72.83999634 W

==== CHANNEL f2 =====  
 SFO2 499.8724993 MHz  
 NUC2 1H  
 CPDPRG[2] waltz16  
 PCPD2 80.00 usec  
 PLW2 19.00000000 W  
 PLW12 0.29688001 W

F2 - Processing parameters  
 SI 1048576  
 SF 125.6924115 MHz  
 WDW EM  
 SSB 0  
 LB 0.30 Hz  
 GB 0  
 PC 1.40

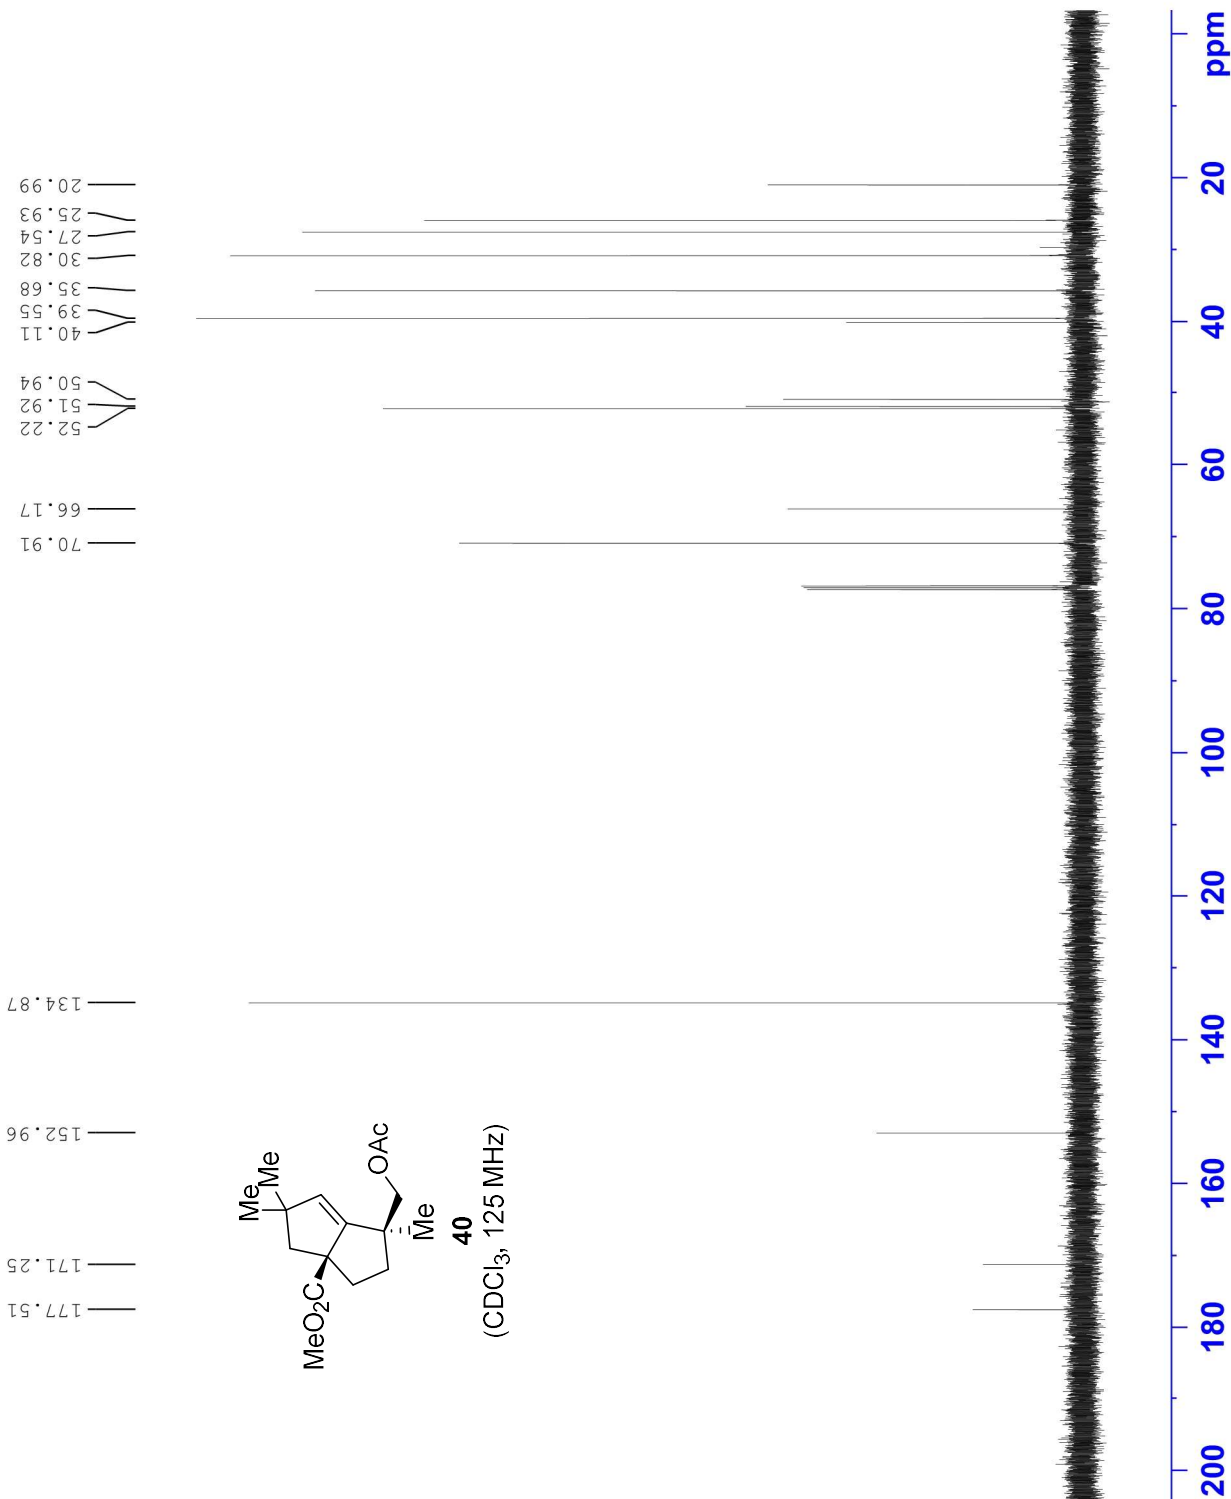



Current Data Parameters  
 NAME Yh-5-39  
 EXPNO 3  
 PROCNO 3

F2 - Acquisition Parameters  
 Date\_ 20180725  
 Time\_ 22.44  
 INSTRUM spect  
 PROBHD 5 mm PABBO BB/  
 PULPROG zgdc  
 TD 187496  
 SOLVENT CDC13  
 NS 507  
 DS 0  
 SWH 31250.000 Hz  
 FIDRES 0.166670 Hz  
 AQ 2.9999361 sec  
 RG 2050  
 DW 16.000 usec  
 DE 6.50 usec  
 TE 298.2 K  
 D1 3.0000000 sec  
 D11 0.0300000 sec  
 TD0 1

==== CHANNEL f1 =====  
 SFO1 125.7049802 MHz  
 NUC1 13C  
 P1 10.00 usec  
 PLW1 72.83999634 W

==== CHANNEL f2 =====  
 SFO2 499.8724993 MHz  
 NUC2 1H  
 CPDPRG[2] waltz16  
 PCPD2 80.00 usec  
 PLW2 19.00000000 W  
 PLW12 0.29688001 W

F2 - Processing parameters  
 SI 1048576  
 SF 125.6924115 MHz  
 WDW EM  
 SSB 0  
 LB 0.30 Hz  
 GB 0  
 PC 1.40

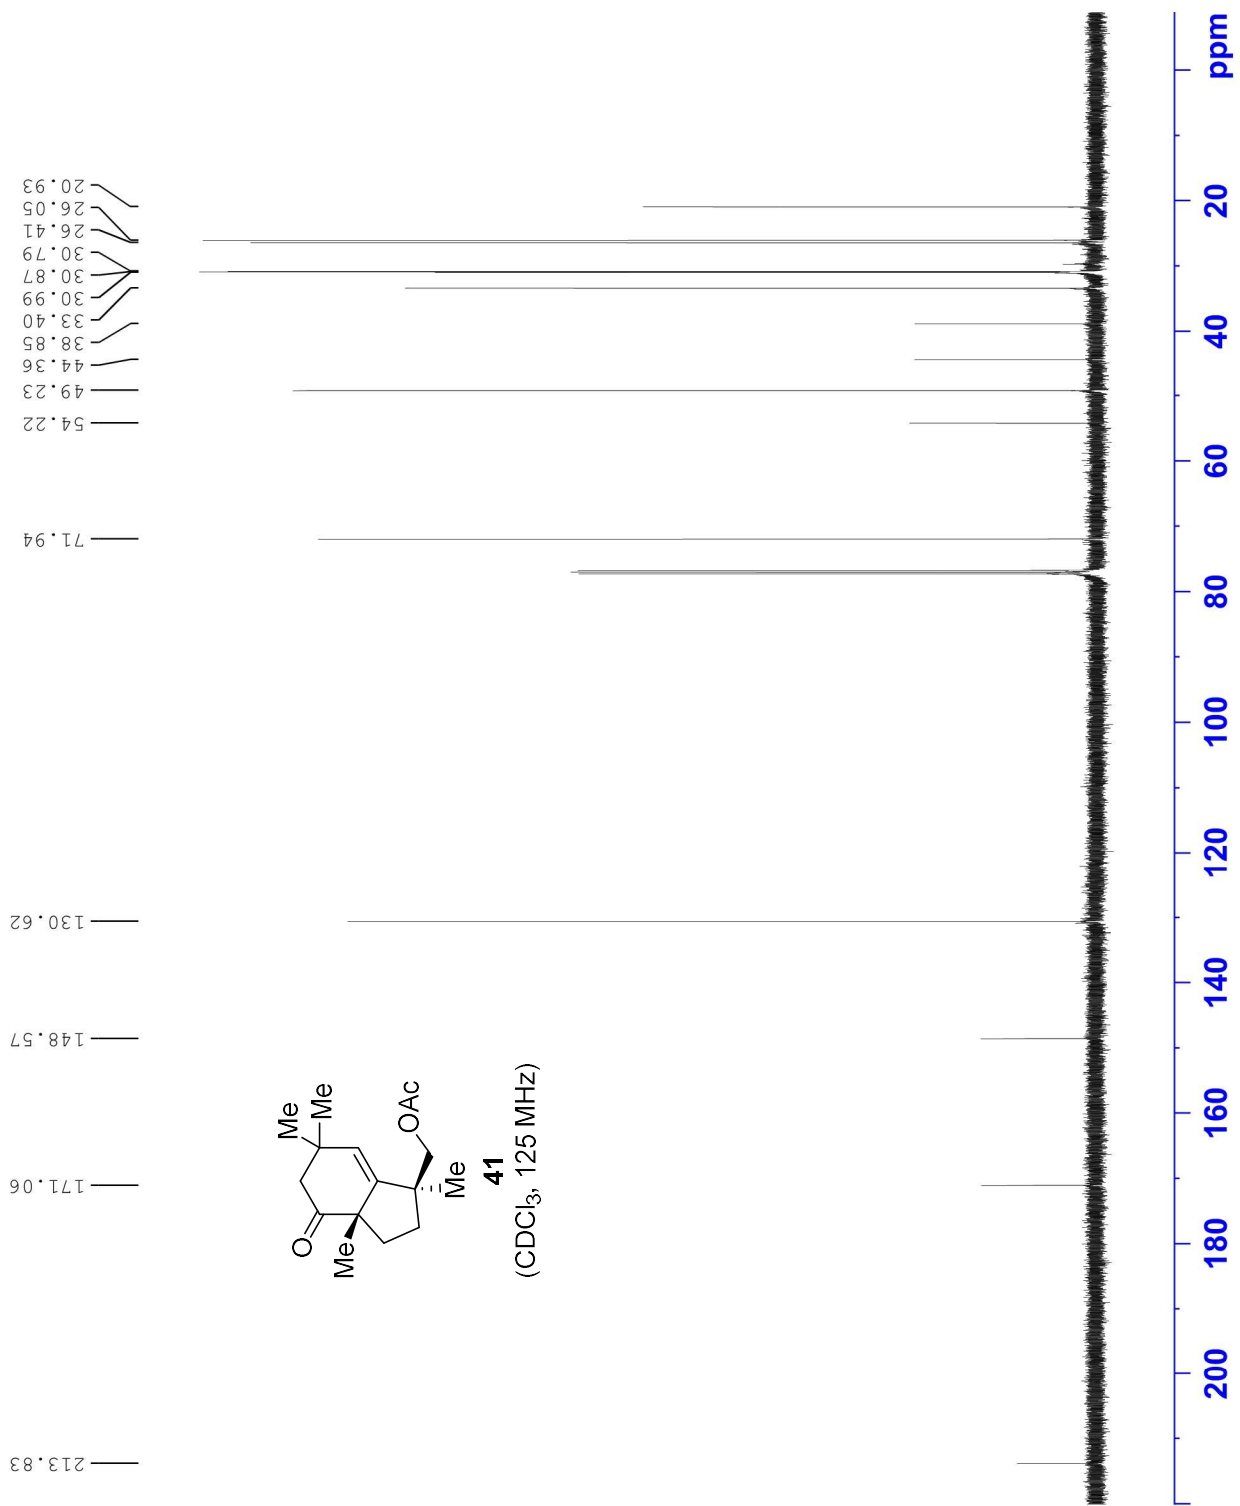



Current Data Parameters  
 NAME Yh-5-88-a  
 EXPNO 1  
 PROCNO 1

F2 - Acquisition Parameters

Date\_ 20181022  
 Time\_ 11.53  
 INSTRUM spect  
 PROBHD 5 mm PABBO BB/  
 PULPROG zg  
 TD 59998  
 SOLVENT CDC13  
 NS 8  
 DS 0  
 SWH 10000.000 Hz  
 FIDRES 0.166672 Hz  
 AQ 2.9999001 sec  
 RG 56.75  
 DW 50.000 usec  
 DE 6.50 usec  
 TE 297.2 K  
 D1 4.00000000 sec  
 TD0 1

==== CHANNEL f1 =====  
 SFO1 499.8730869 MHz  
 NUC1 1H  
 P1 3.58 usec  
 PLW1 18.25000000 W

F2 - Processing parameters  
 SI 65536  
 SF 499.8700120 MHz  
 EM  
 WDW 0  
 SSB 0  
 LB 0.30 Hz  
 GB 0  
 PC 1.00

4.00  
3.97  
3.92  
3.90  
3.81  
3.79  
3.73  
3.70  
3.68  
2.19  
2.18  
2.18  
2.16  
2.16  
2.16  
2.15  
2.04  
1.63  
1.62  
1.62  
1.62  
1.60  
1.60  
1.59  
1.54  
1.51  
1.20  
1.11  
0.90

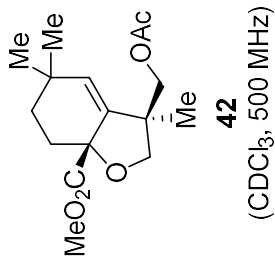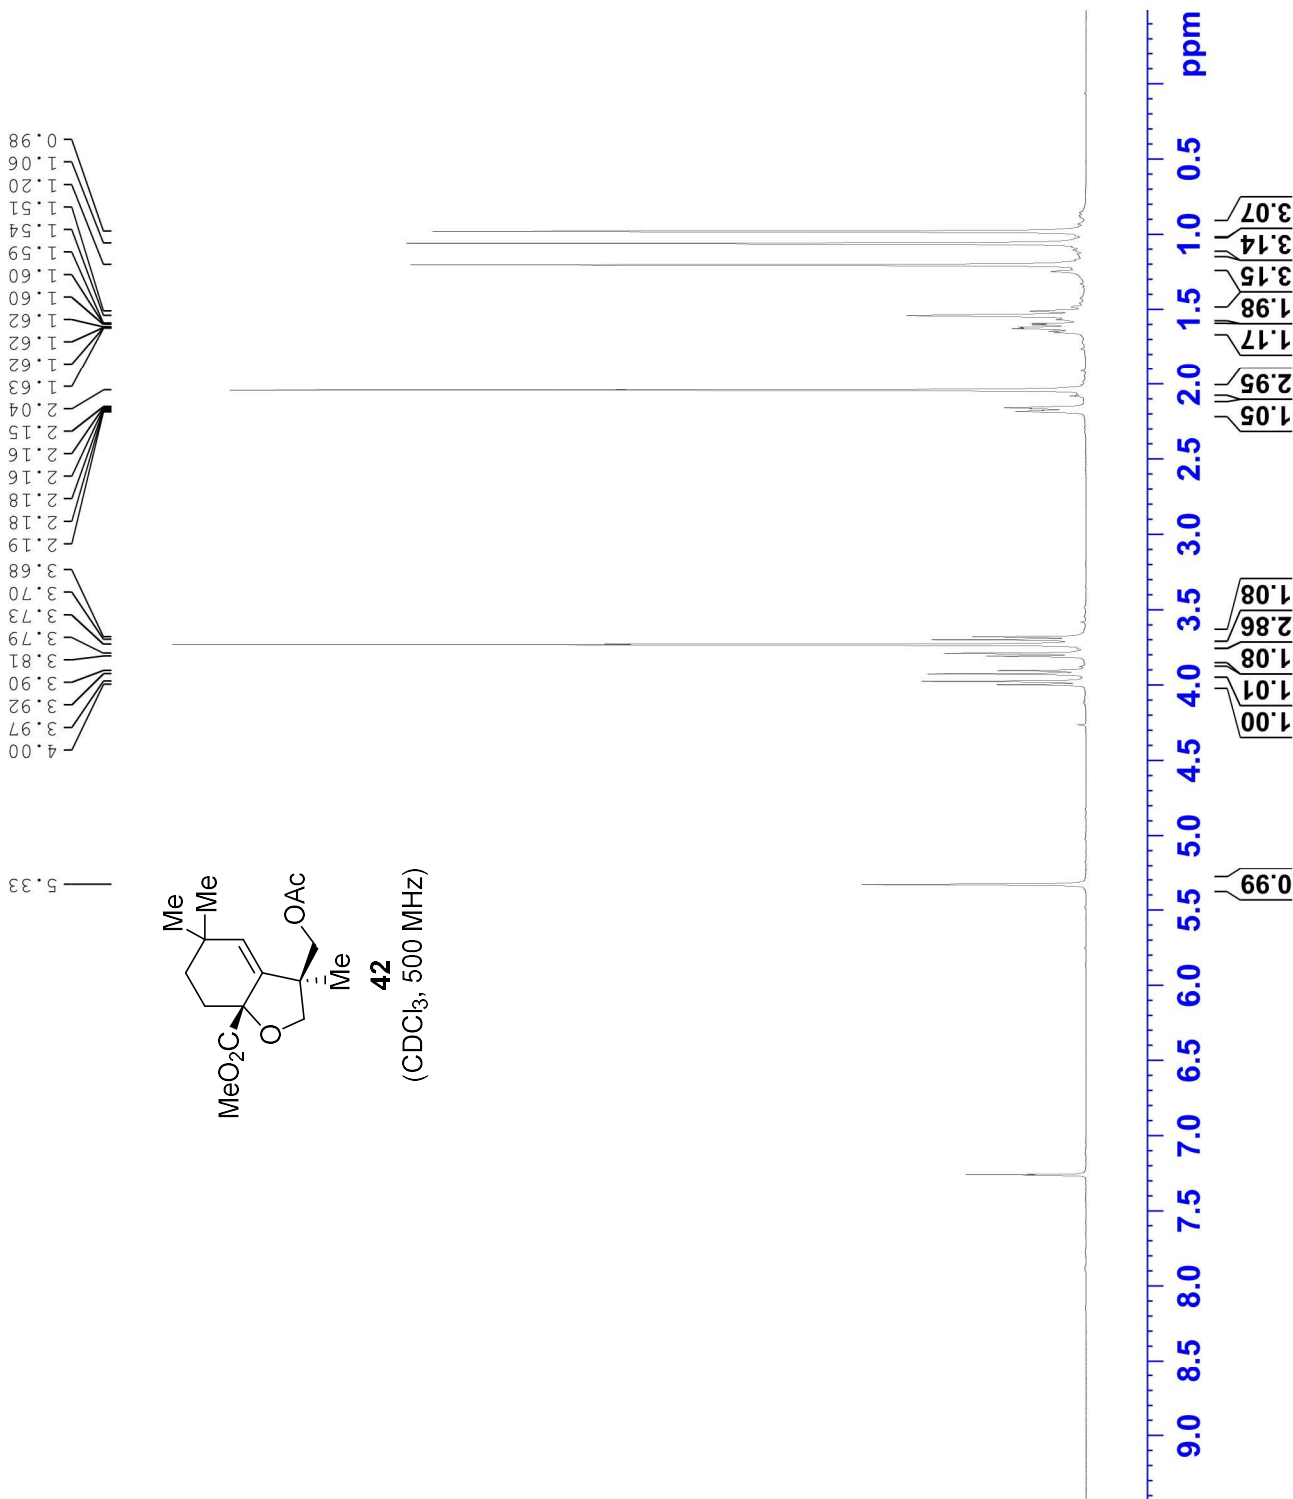

Current Data Parameters  
 NAME yh-5-88-a  
 EXPNO 2  
 PROCNO 2

F2 - Acquisition Parameters  
 Date\_ 20181022  
 Time\_ 13.52  
 INSTRUM spect  
 PROBHD 5 mm PAQNP 1H/  
 PULPROG zgpg  
 TD 197364  
 SOLVENT CDC13  
 NS 64  
 DS 0  
 SWH 32894.738 Hz  
 FIDRES 0.166670 Hz  
 AQ 2.9999328 sec  
 RG 2050  
 DW 15.200 usec  
 DE 6.00 usec  
 TE 295.5 K  
 D1 10.00000000 sec  
 D11 0.03000000 sec  
 TD0 1

==== CHANNEL f1 =====  
 NUC1 13C  
 P1 9.90 usec  
 PL1 1.00 dB  
 PL1W 72.42802429 W  
 SFO1 125.7716224 MHz

==== CHANNEL f2 =====  
 CPDPRG[2] waltz16  
 NUC2 1H  
 PCPD2 80.00 usec  
 PL2 0 dB  
 PL12 16.50 dB  
 PL13 17.00 dB  
 PL2W 24.54113007 W  
 PL12W 0.54940748 W  
 PL13W 0.48965994 W  
 SFO2 500.1325006 MHz

F2 - Processing parameters  
 SI 131072  
 SF 125.7577890 MHz  
 WDW EM  
 SSB 0  
 LB 0.30 Hz  
 GB 0  
 PC 1.40

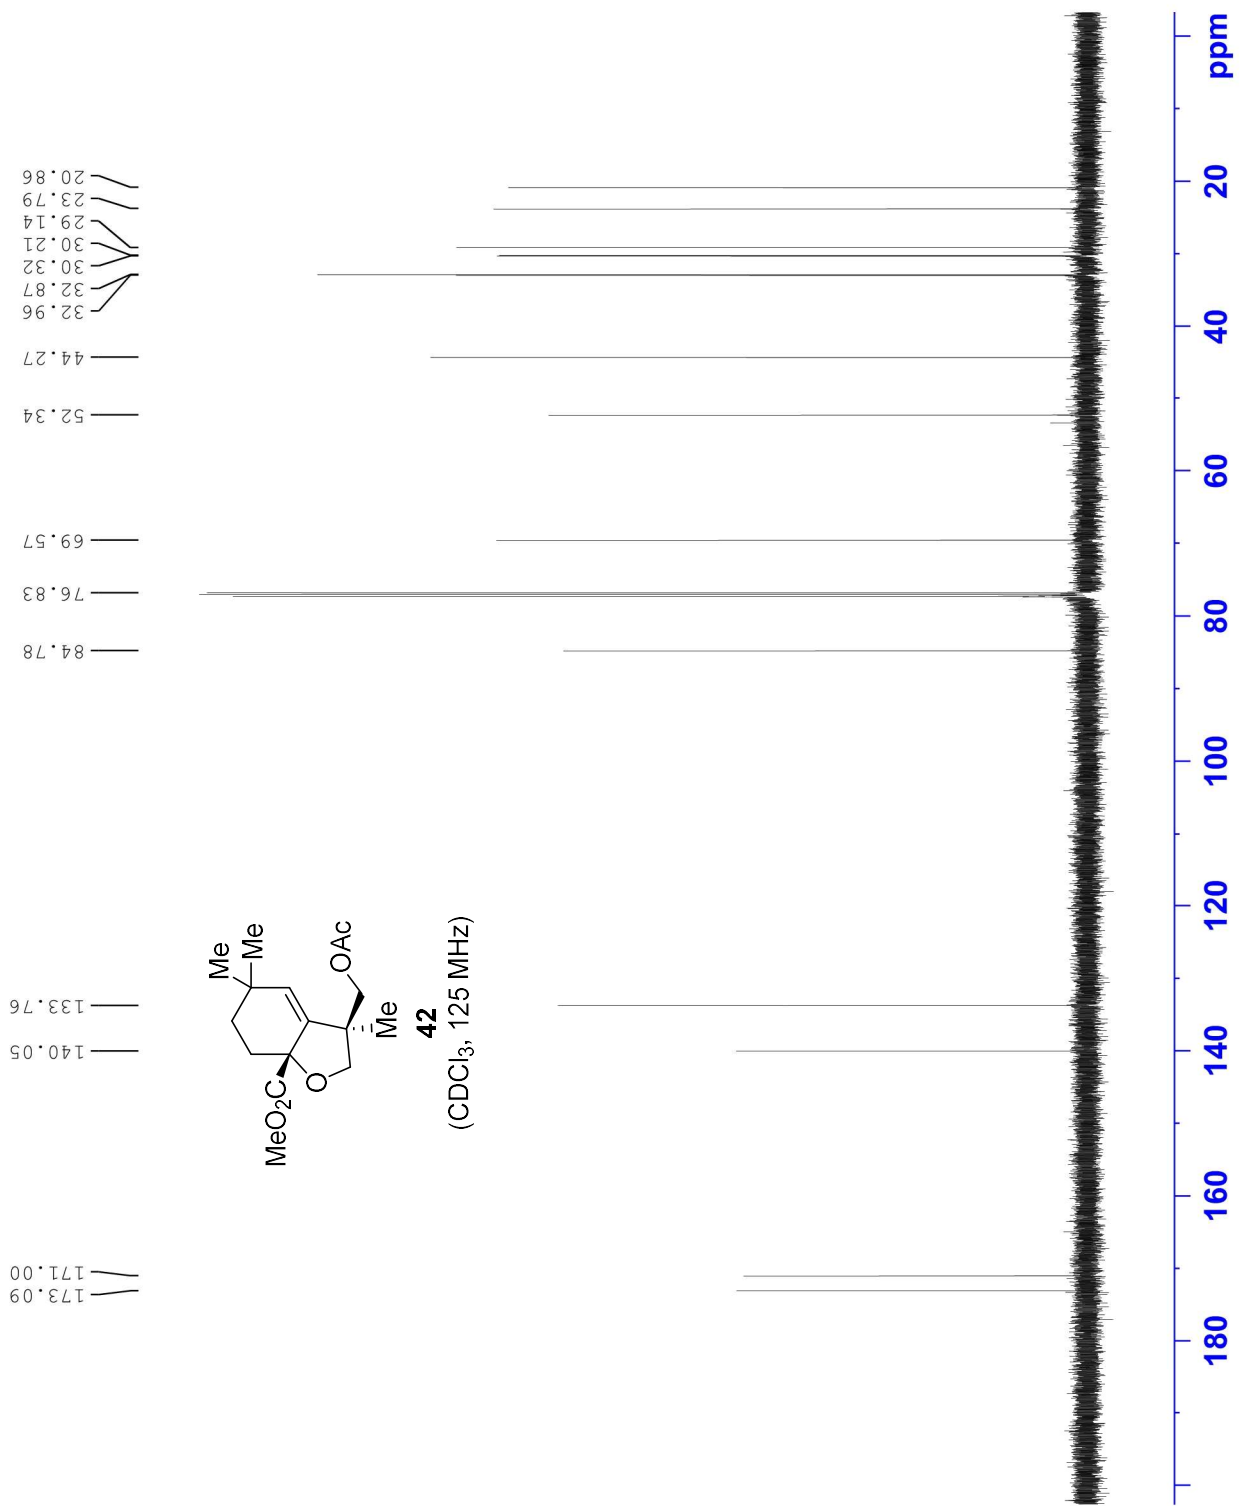

Current Data Parameters  
 NAME yh-3-3-a  
 EXPNO 1  
 PROCNO 1

F2 - Acquisition Parameters

Date\_ 20180131  
 Time\_ 22.59  
 INSTRUM spect  
 PROBHD 5 mm PABBO BB/  
 PULPROG zg  
 TD 59998  
 SOLVENT CDC13  
 NS 4  
 DS 0  
 SWH 10000.000 Hz  
 FIDRES 0.166672 Hz  
 AQ 2.9999001 sec  
 RG 22.37  
 DW 50.000 usec  
 DE 6.50 usec  
 TE 296.8 K  
 D1 3.0000000 sec  
 TD0 1

==== CHANNEL f1 =====  
 SFO1 499.8730869 MHz  
 NUC1 1H  
 P1 10.75 usec  
 PLW1 18.25000000 W

F2 - Processing parameters  
 SI 65536  
 SF 499.8700120 MHz  
 EM  
 WDW 0  
 SSB 0  
 LB 0.30 Hz  
 GB 0  
 PC 1.00

7.35  
7.33  
7.32  
7.30  
7.29  
7.27  
7.26  
4.99  
4.15  
4.13  
3.66  
3.46  
3.44  
3.24  
3.22  
2.21  
2.20  
2.19  
2.00  
1.90  
1.89  
1.87  
1.86  
1.47  
1.45  
1.45  
1.44  
1.43  
1.42  
1.41  
1.34  
1.33  
1.33  
1.31  
1.31  
1.31  
1.31  
0.99  
0.99  
0.91

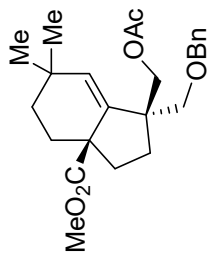

(CDCl<sub>3</sub>, 500 MHz)

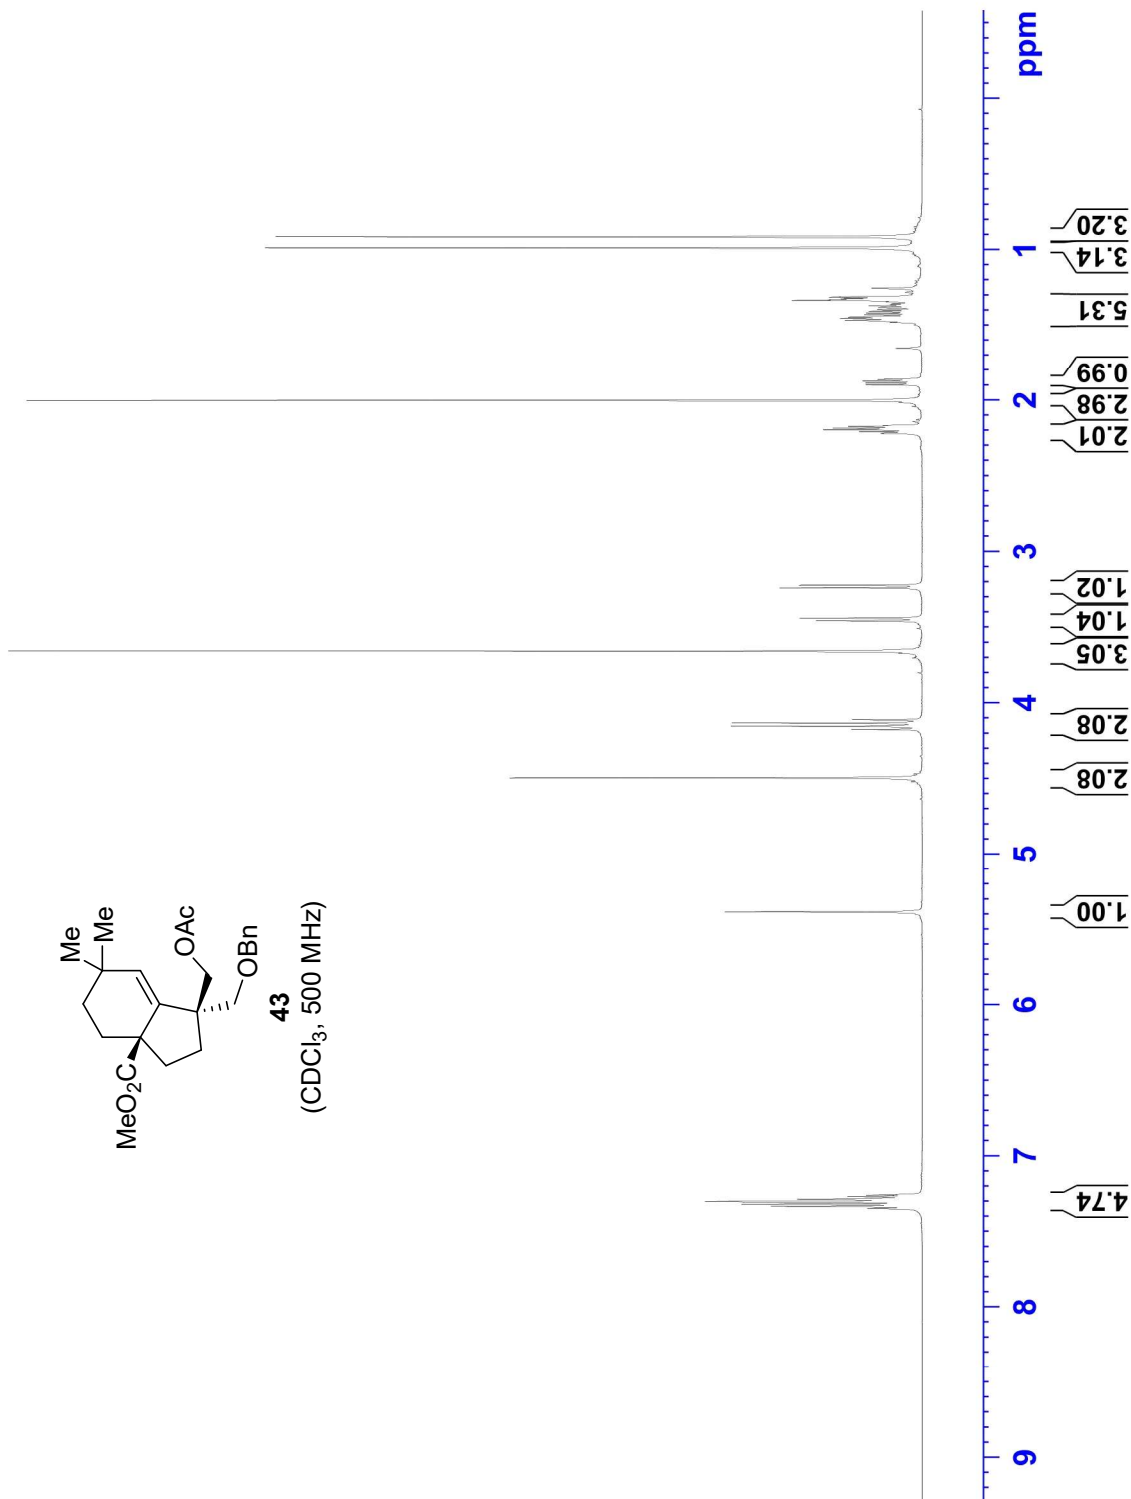

Current Data Parameters  
 NAME yh-3-3-a  
 EXPNO 2  
 PROCNO 2

F2 - Acquisition Parameters  
 Date\_ 20180131  
 Time\_ 23.09  
 INSTRUM spect  
 PROBHD 5 mm PABBO BB/  
 PULPROG zgdc  
 TD 187496  
 SOLVENT CDC13  
 NS 18  
 DS 0  
 SWH 31250.000 Hz  
 FIDRES 0.166670 Hz  
 AQ 2.9999361 sec  
 RG 2050  
 DW 16.000 usec  
 DE 6.50 usec  
 TE 297.1 K  
 D1 3.00000000 sec  
 D11 0.03000000 sec  
 TD0 1

==== CHANNEL f1 =====  
 SFO1 125.7049802 MHz  
 NUC1 13C  
 P1 10.00 usec  
 PLW1 72.83999634 W

==== CHANNEL f2 =====  
 SFO2 499.8724993 MHz  
 NUC2 1H  
 CPDPRG[2] waltz16  
 PCPD2 80.00 usec  
 PLW2 19.00000000 W  
 PLW12 0.29688001 W

F2 - Processing parameters  
 SI 1048576  
 SF 125.6924115 MHz  
 WDW EM  
 SSB 0  
 LB 0.30 Hz  
 GB 0  
 PC 1.40

20.97  
 29.50  
 30.47  
 30.74  
 31.52  
 32.65  
 34.89  
 36.10  
 48.11  
 51.92  
 55.53  
 67.61  
 73.23  
 74.01

127.26  
 127.38  
 128.29  
 133.98  
 138.76  
 140.48

170.96  
 176.79

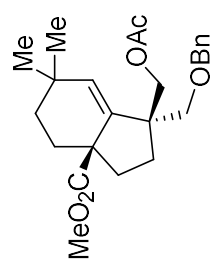

(CDCl<sub>3</sub>, 125 MHz)

ppm

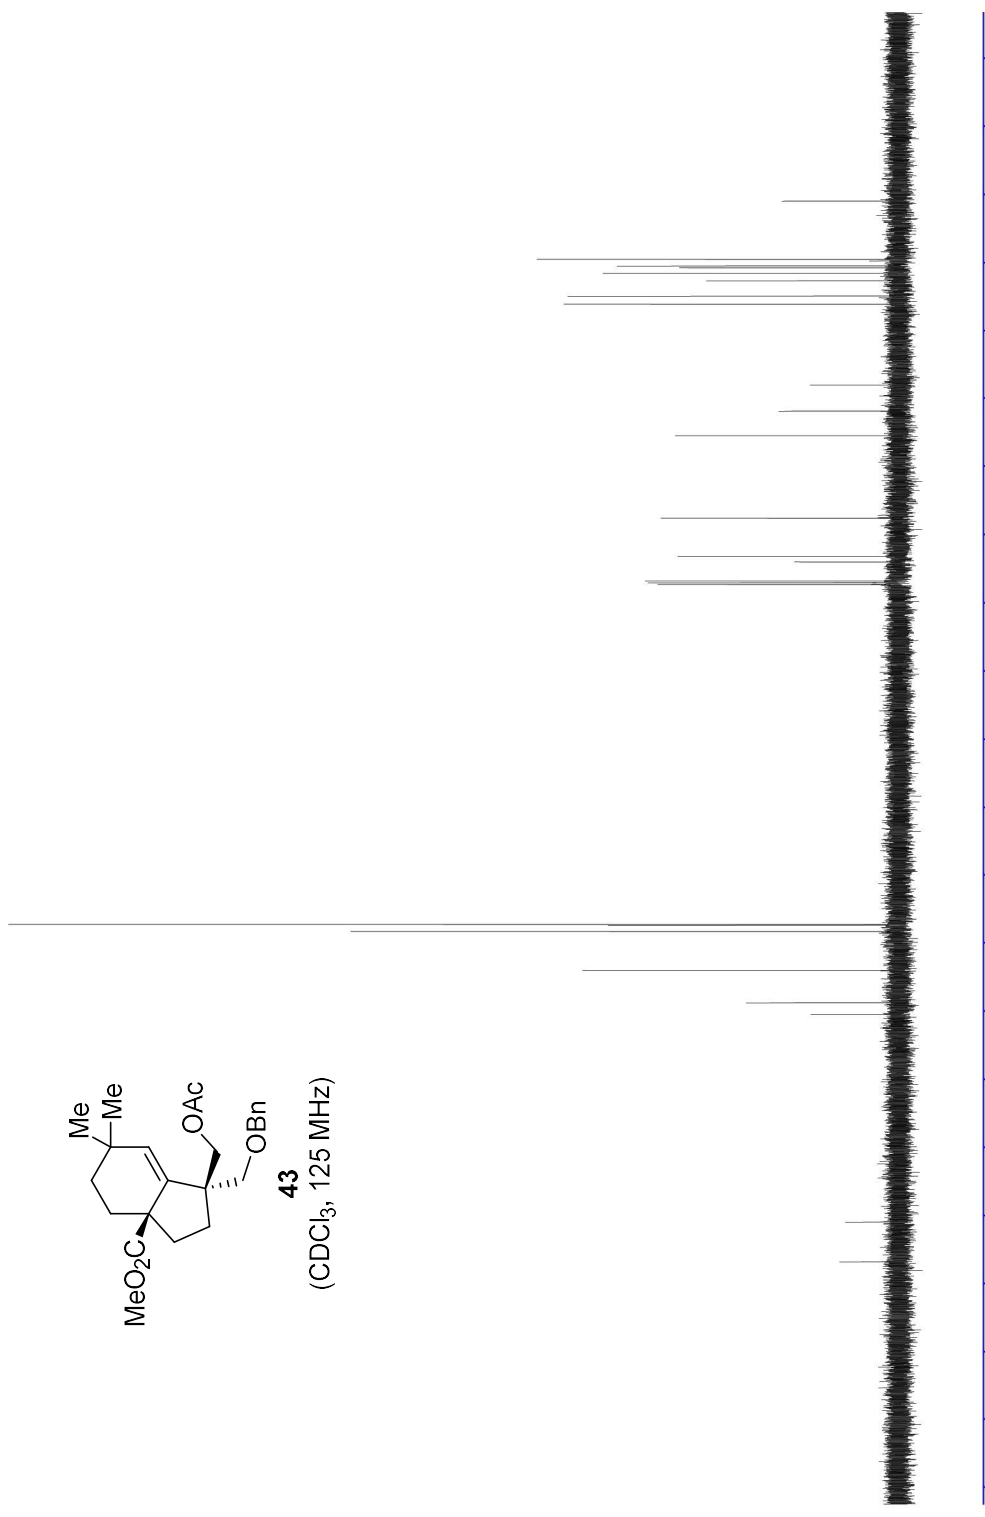

Current Data Parameters  
 NAME yh-5-21  
 EXPNO 1  
 PROCNO 1

F2 - Acquisition Parameters  
 Date\_ 20180711  
 Time\_ 21.11  
 INSTRUM spect  
 PROBHD 5 mm PABBO BB/  
 PULPROG zg  
 TD 59998  
 SOLVENT CDC13  
 NS 16  
 DS 0  
 SWH 10000.000 Hz  
 FIDRES 0.166672 Hz  
 AQ 2.9999001 sec  
 RG 77.07  
 DW 50.000 usec  
 DE 6.50 usec  
 TE 296.7 K  
 D1 4.0000000 sec  
 TD0 1

==== CHANNEL f1 =====  
 SFO1 499.8730869 MHz  
 NUC1 1H  
 P1 3.58 usec  
 PLW1 18.25000000 W

F2 - Processing parameters  
 SI 65536  
 SF 499.8700122 MHz  
 EM  
 WDW 0  
 SSB 0  
 LB 0.30 Hz  
 GB 0  
 PC 1.00

3.75  
3.63  
2.44  
2.43  
2.41  
2.41  
2.03  
1.78  
1.77  
1.76  
1.75  
1.75  
1.75  
1.67  
1.67  
1.67  
1.65  
1.64  
1.64  
1.52  
1.50  
1.33  
1.32  
1.25  
1.24  
1.22  
1.21  
1.20  
1.19  
1.09  
1.00  
0.96

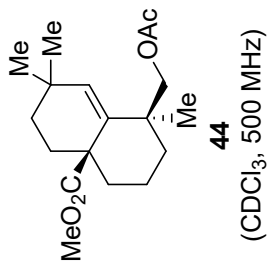

5.47

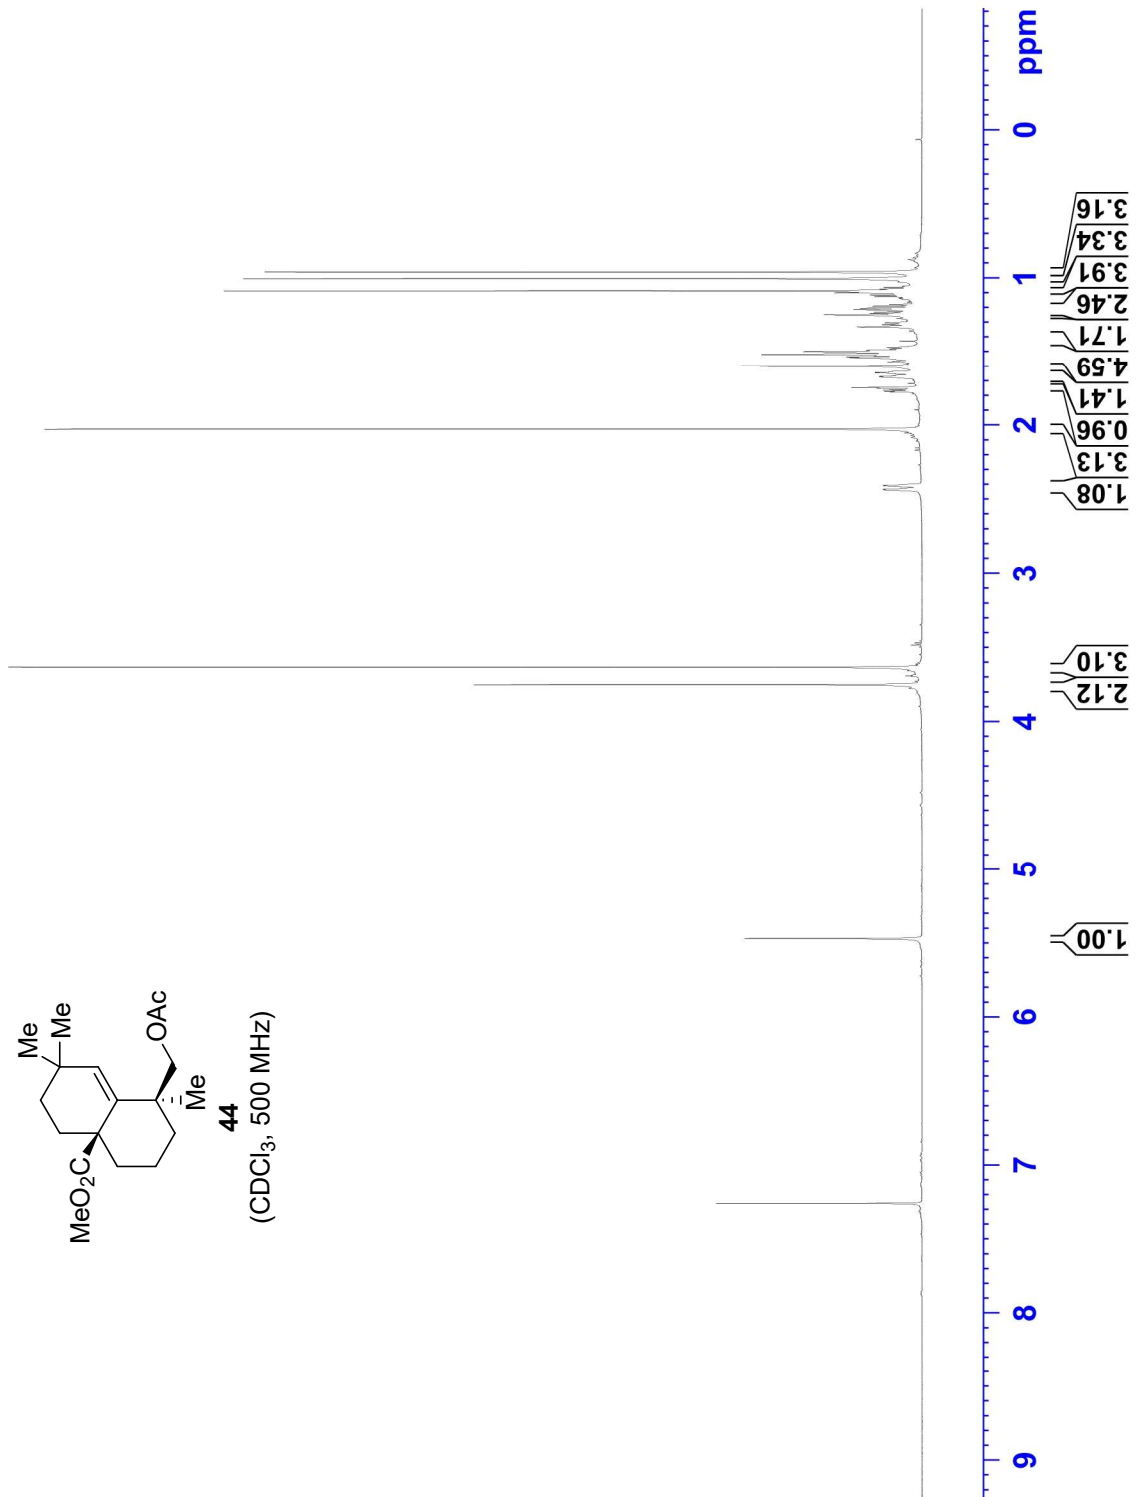

Current Data Parameters  
 NAME Yh-5-21  
 EXPNO 2  
 PROCNO 2

F2 - Acquisition Parameters  
 Date\_ 20180711  
 Time\_ 22.40  
 INSTRUM spect  
 PROBHD 5 mm PABBO BB/  
 PULPROG zgdc  
 TD 187496  
 SOLVENT CDCl3  
 NS 810  
 DS 0  
 SWH 31250.000 Hz  
 FIDRES 0.166670 Hz  
 AQ 2.9999361 sec  
 RG 2050  
 DW 16.000 usec  
 DE 6.50 usec  
 TE 298.4 K  
 D1 3.0000000 sec  
 D11 0.0300000 sec  
 TD0 1

==== CHANNEL f1 =====  
 SFO1 125.7049802 MHz  
 NUC1 13C  
 P1 10.00 usec  
 PLW1 72.83999634 W

==== CHANNEL f2 =====  
 SFO2 499.8724993 MHz  
 NUC2 1H  
 CPDPRG[2] waltz16  
 PCPD2 80.00 usec  
 PLW2 19.0000000 W  
 PLW12 0.29688001 W

F2 - Processing parameters  
 SI 1048576  
 SF 125.6924115 MHz  
 WDW EM  
 SSB 0  
 LB 0.30 Hz  
 GB 0  
 PC 1.40

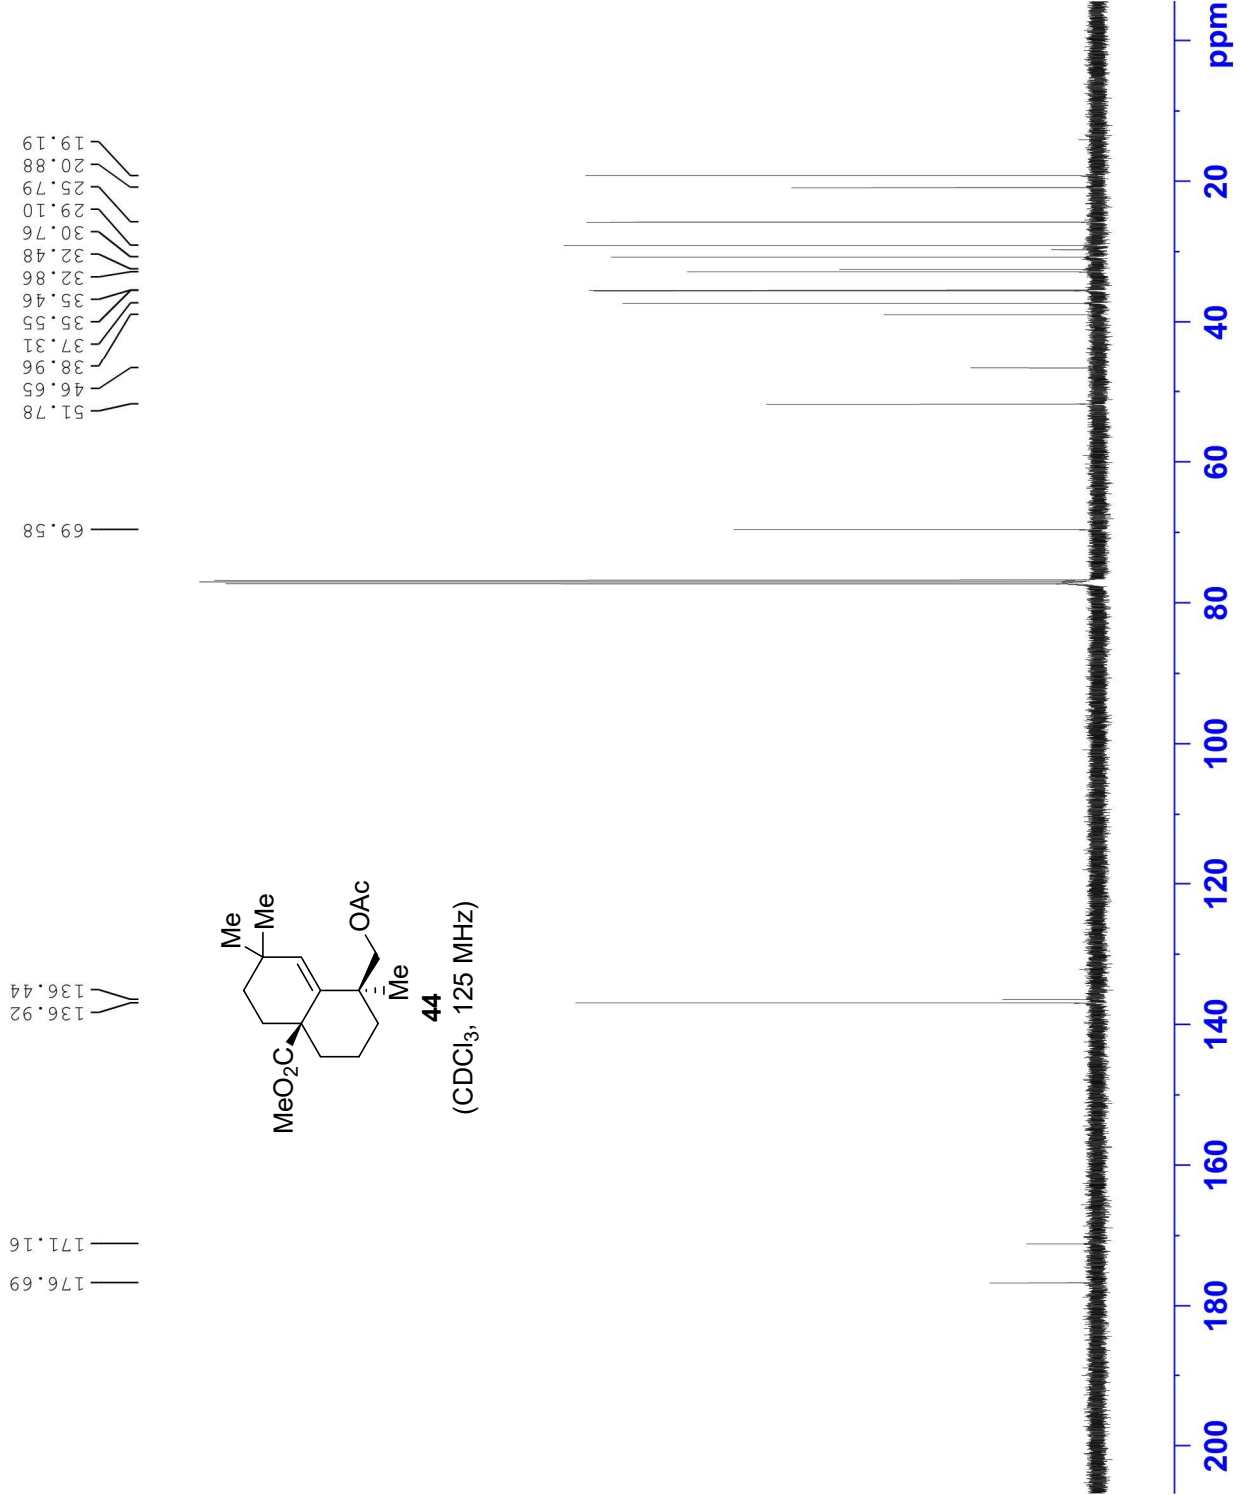

Current Data Parameters  
 NAME yh-3-36-rH  
 EXPNO 1  
 PROCNO 1

F2 - Acquisition Parameters  
 Date\_ 20171104  
 Time\_ 21.34  
 INSTRUM spect  
 PROBHD 5 mm PATXI 1H/  
 PULPROG zg  
 TD 59998  
 SOLVENT CDC13  
 NS 8  
 DS 0  
 SWH 10000.000 Hz  
 FIDRES 0.166672 Hz  
 AQ 2.9999001 sec  
 RG 55.8  
 DW 50.000 usec  
 DE 10.00 usec  
 TE 294.7 K  
 D1 2.0000000 sec  
 TD0 1

==== CHANNEL f1 =====  
 SFO1 500.1330885 MHz  
 NUC1 1H  
 P1 8.00 usec  
 PLW1 12.19999981 W

F2 - Processing parameters  
 SI 65536  
 SF 500.1300131 MHz  
 EM  
 WDW 0  
 SSB 0 0.30 Hz  
 LB 0  
 GB 0  
 PC 1.00

5.28  
4.03  
4.01  
3.84  
3.83  
3.82  
3.81  
2.59  
2.58  
2.57  
2.56  
2.23  
2.22  
2.21  
2.20  
2.19  
2.18  
1.97  
1.96  
1.95  
1.94  
1.93  
1.92  
1.78  
1.77  
1.77  
1.76  
1.75  
1.75  
1.74  
1.74  
1.73  
1.72  
1.71  
1.64  
1.63  
1.62  
1.61  
1.59

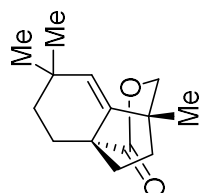

**47**  
 (CDCl<sub>3</sub>, 500 MHz)

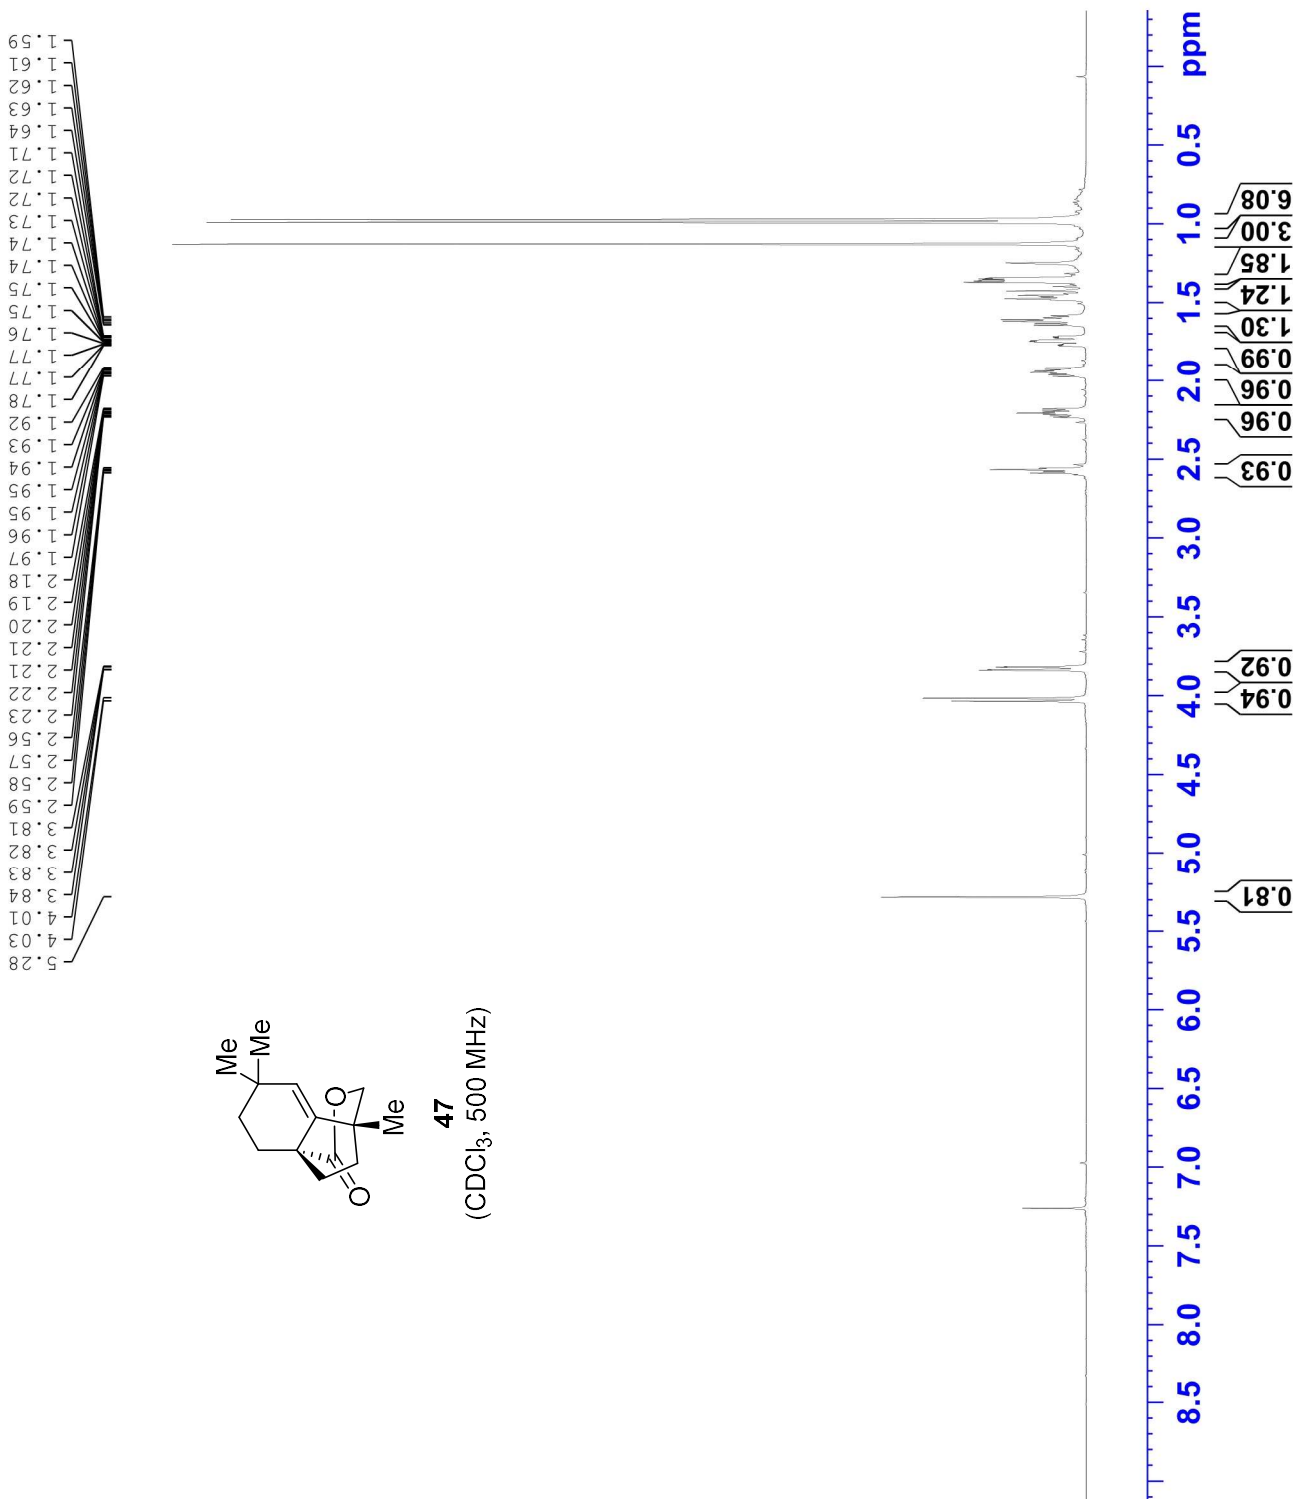

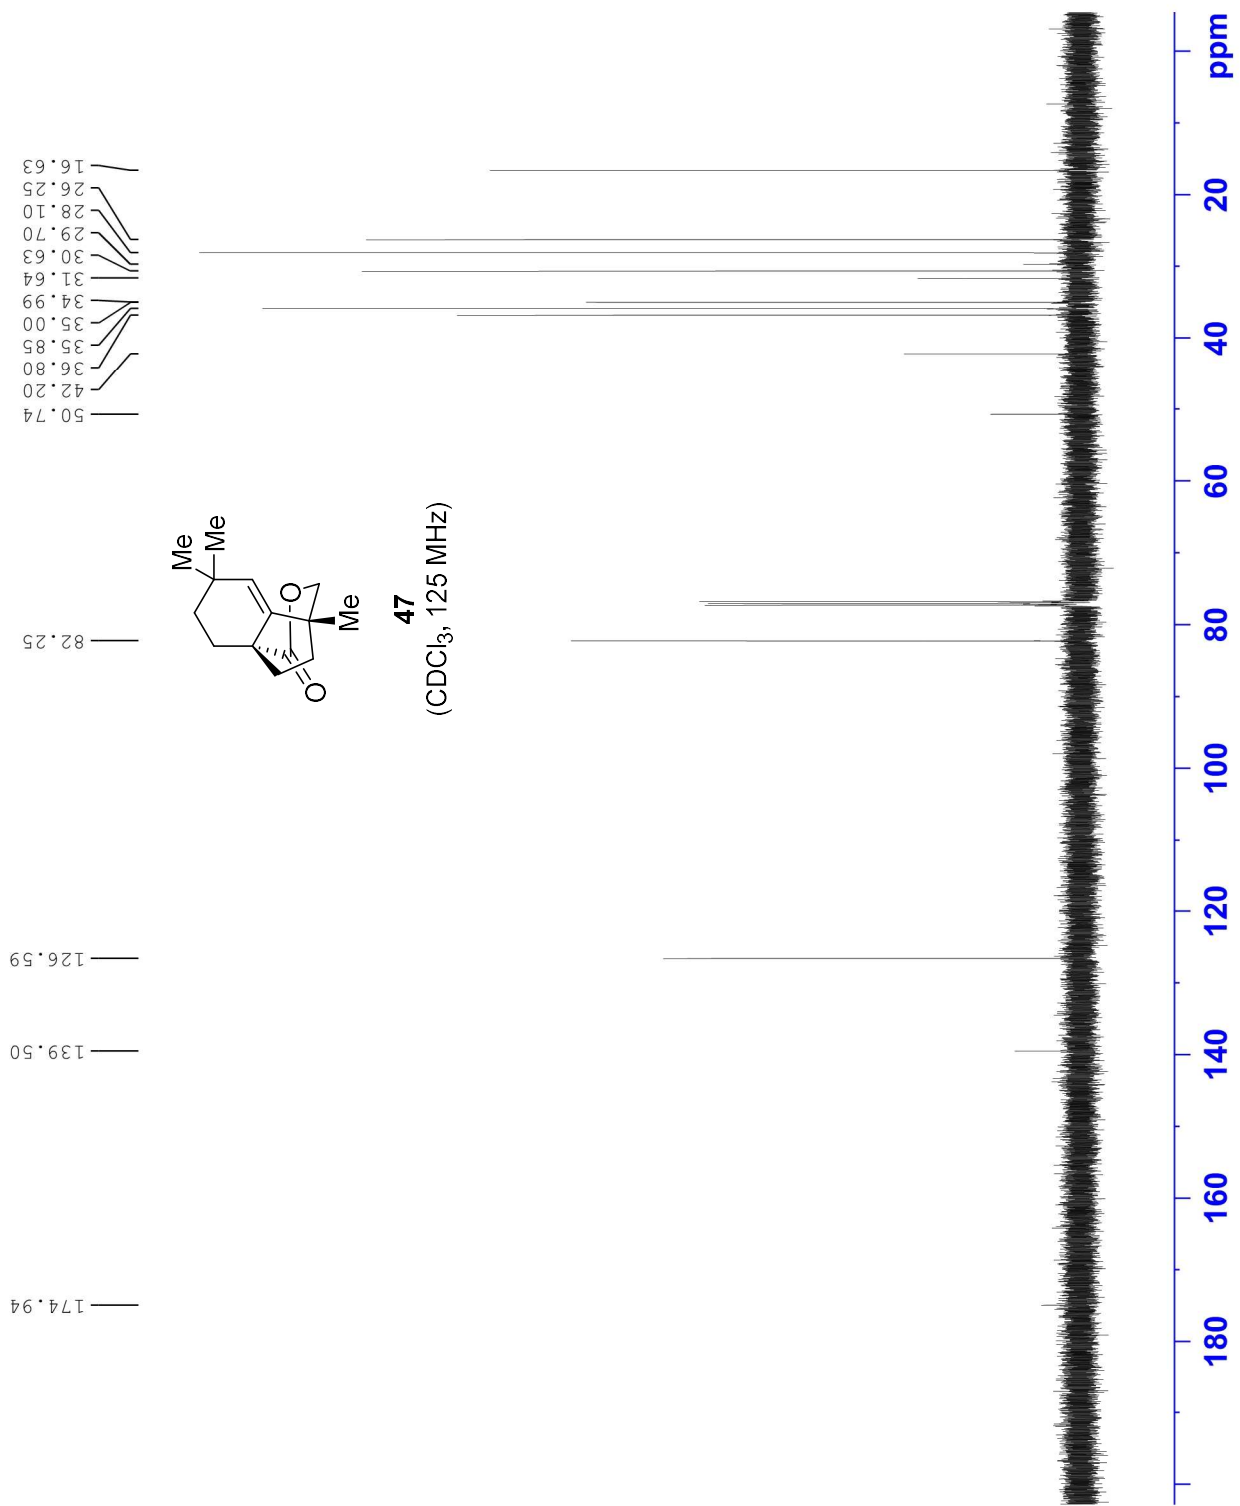

Current Data Parameters  
 NAME Yh-3-36-1C  
 EXPNO 1  
 PROCNO 1

F2 - Acquisition Parameters  
 Date\_ 20180822  
 Time\_ 14.15  
 INSTRUM spect  
 PROBHD 5 mm PABBO BB/  
 PULPROG zgdc  
 TD 187496  
 SOLVENT CDC13  
 NS 147  
 DS 0  
 SWH 31250.000 Hz  
 FIDRES 0.166670 Hz  
 AQ 2.9999361 sec  
 RG 2050  
 DW 16.000 usec  
 DE 6.50 usec  
 TE 296.7 K  
 D1 3.0000000 sec  
 D11 0.0300000 sec  
 TD0 1

==== CHANNEL f1 =====  
 SFO1 125.7049802 MHz  
 NUC1 13C  
 P1 10.00 usec  
 PLW1 72.83999634 W

==== CHANNEL f2 =====  
 SFO2 499.8724993 MHz  
 NUC2 1H  
 CPDPRG[2] waltz16  
 PCPD2 80.00 usec  
 PLW2 19.00000000 W  
 PLW12 0.29688001 W

F2 - Processing parameters  
 SI 1048576  
 SF 125.6924115 MHz  
 WDW EM  
 SSB 0  
 LB 0.30 Hz  
 GB 0  
 PC 1.40



yh-3-36-rH 2 1 E:\Lab\nmr

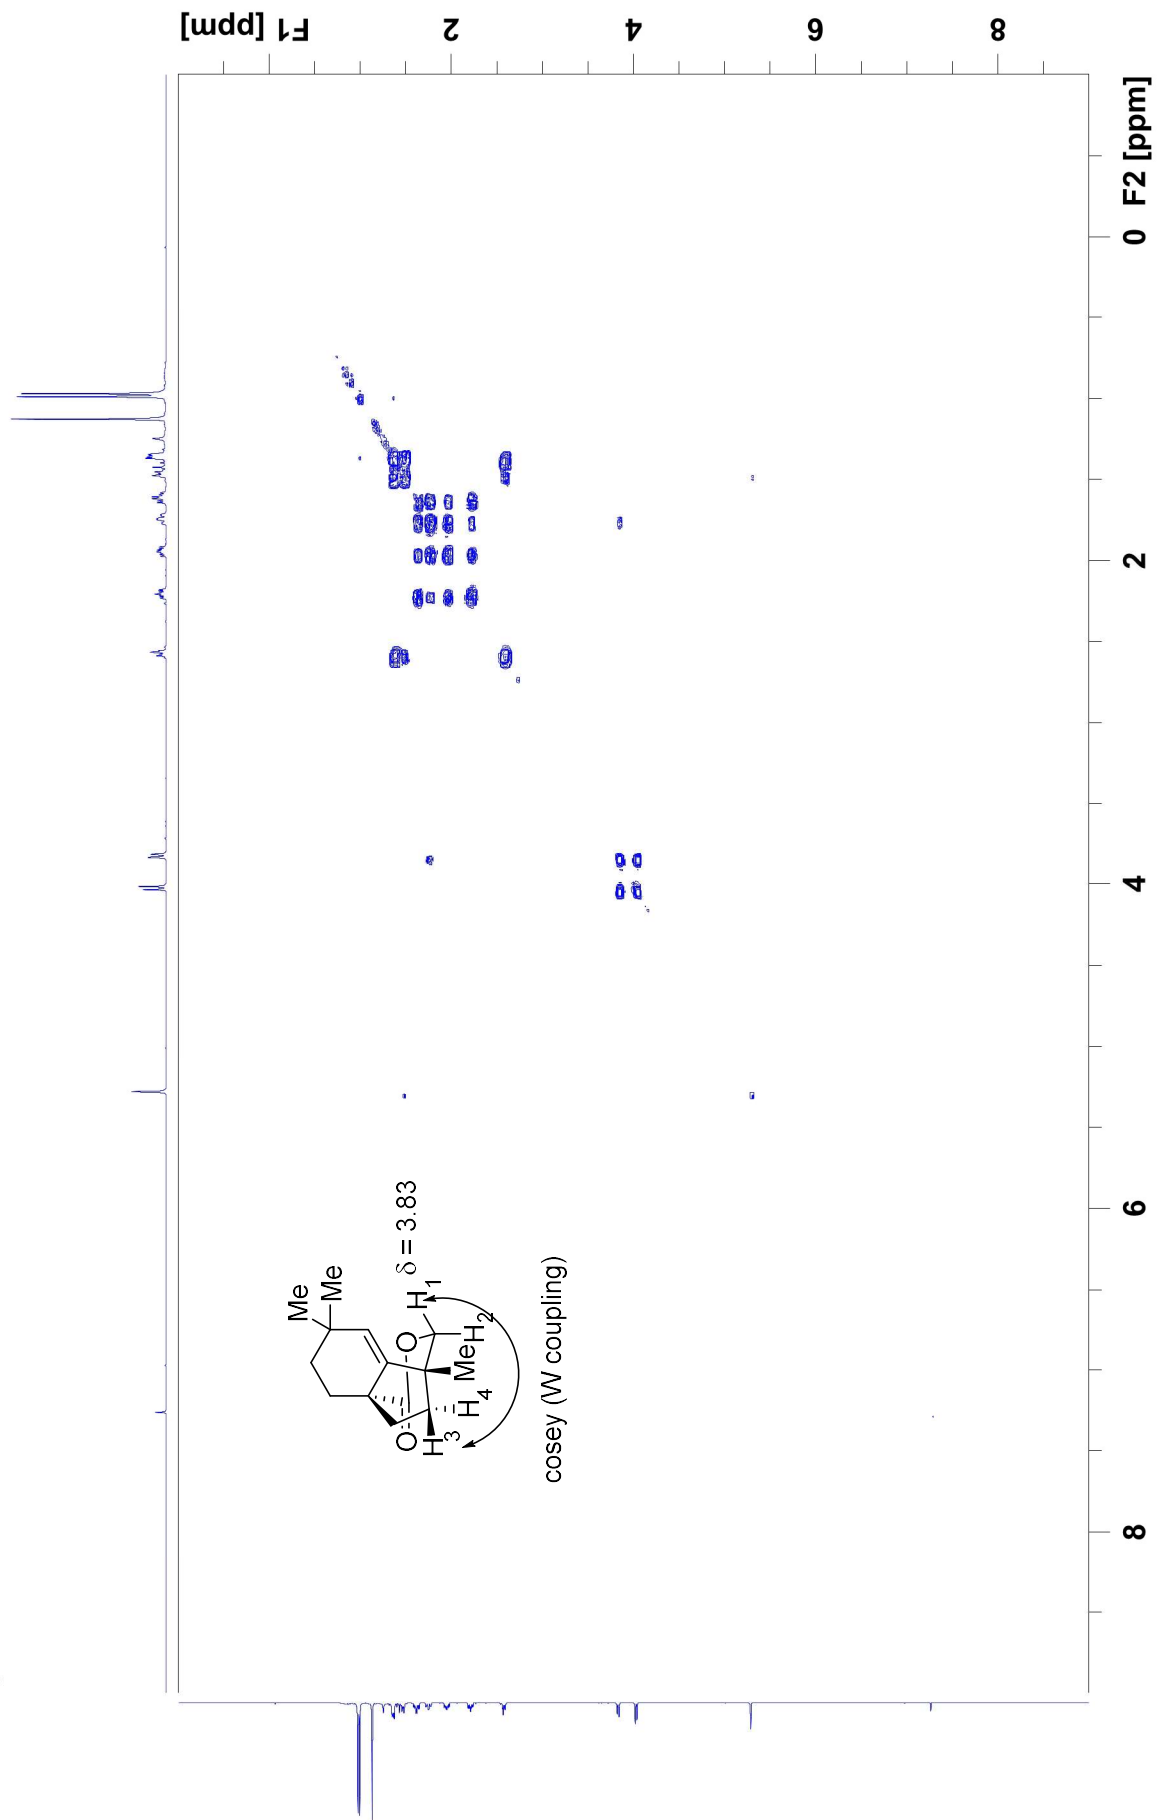

yh-3-36-rH 3 1 E:\Lab\nmr

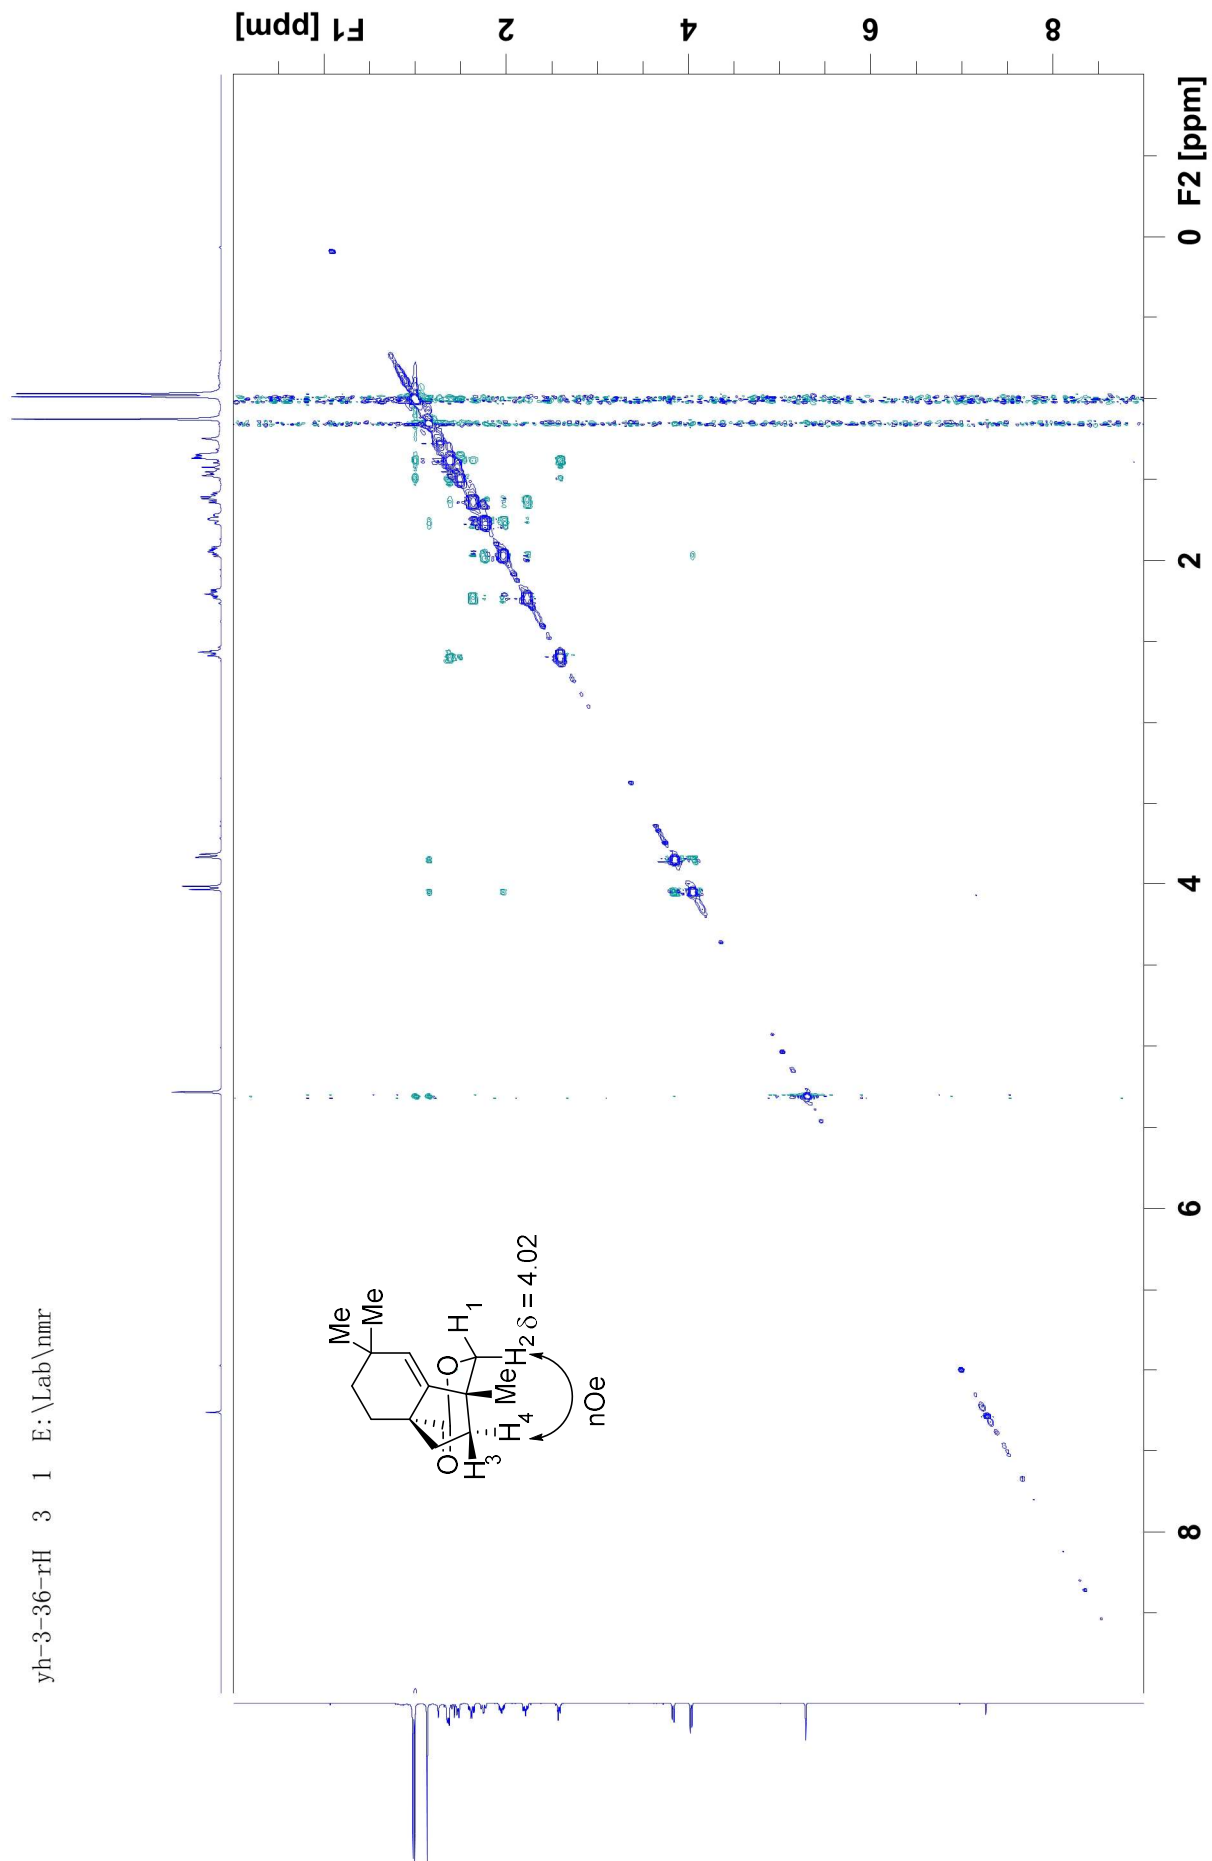





Current Data Parameters  
 NAME Yh-5-49  
 EXPNO 2  
 PROCNO 2

F2 - Acquisition Parameters  
 Date\_ 20180813  
 Time\_ 20.19  
 INSTRUM spect  
 PROBHD 5 mm PABBO BB/  
 PULPROG zgdc  
 TD 187496  
 SOLVENT CDC13  
 NS 165  
 DS 0  
 SWH 31250.000 Hz  
 FIDRES 0.166670 Hz  
 AQ 2.9999361 sec  
 RG 2050  
 DW 16.000 usec  
 DE 6.50 usec  
 TE 297.3 K  
 D1 3.00000000 sec  
 D11 0.03000000 sec  
 TD0 1

==== CHANNEL f1 =====  
 SFO1 125.7049802 MHz  
 NUC1 13C  
 P1 10.00 usec  
 PLW1 72.83999634 W

==== CHANNEL f2 =====  
 SFO2 499.8724993 MHz  
 NUC2 1H  
 CPDPRG[2] waltz16  
 PCPD2 80.00 usec  
 PLW2 19.00000000 W  
 PLW12 0.29688001 W

F2 - Processing parameters  
 SI 1048576  
 SF 125.6924115 MHz  
 WDW EM  
 SSB 0  
 LB 0.30 Hz  
 GB 0  
 PC 1.40

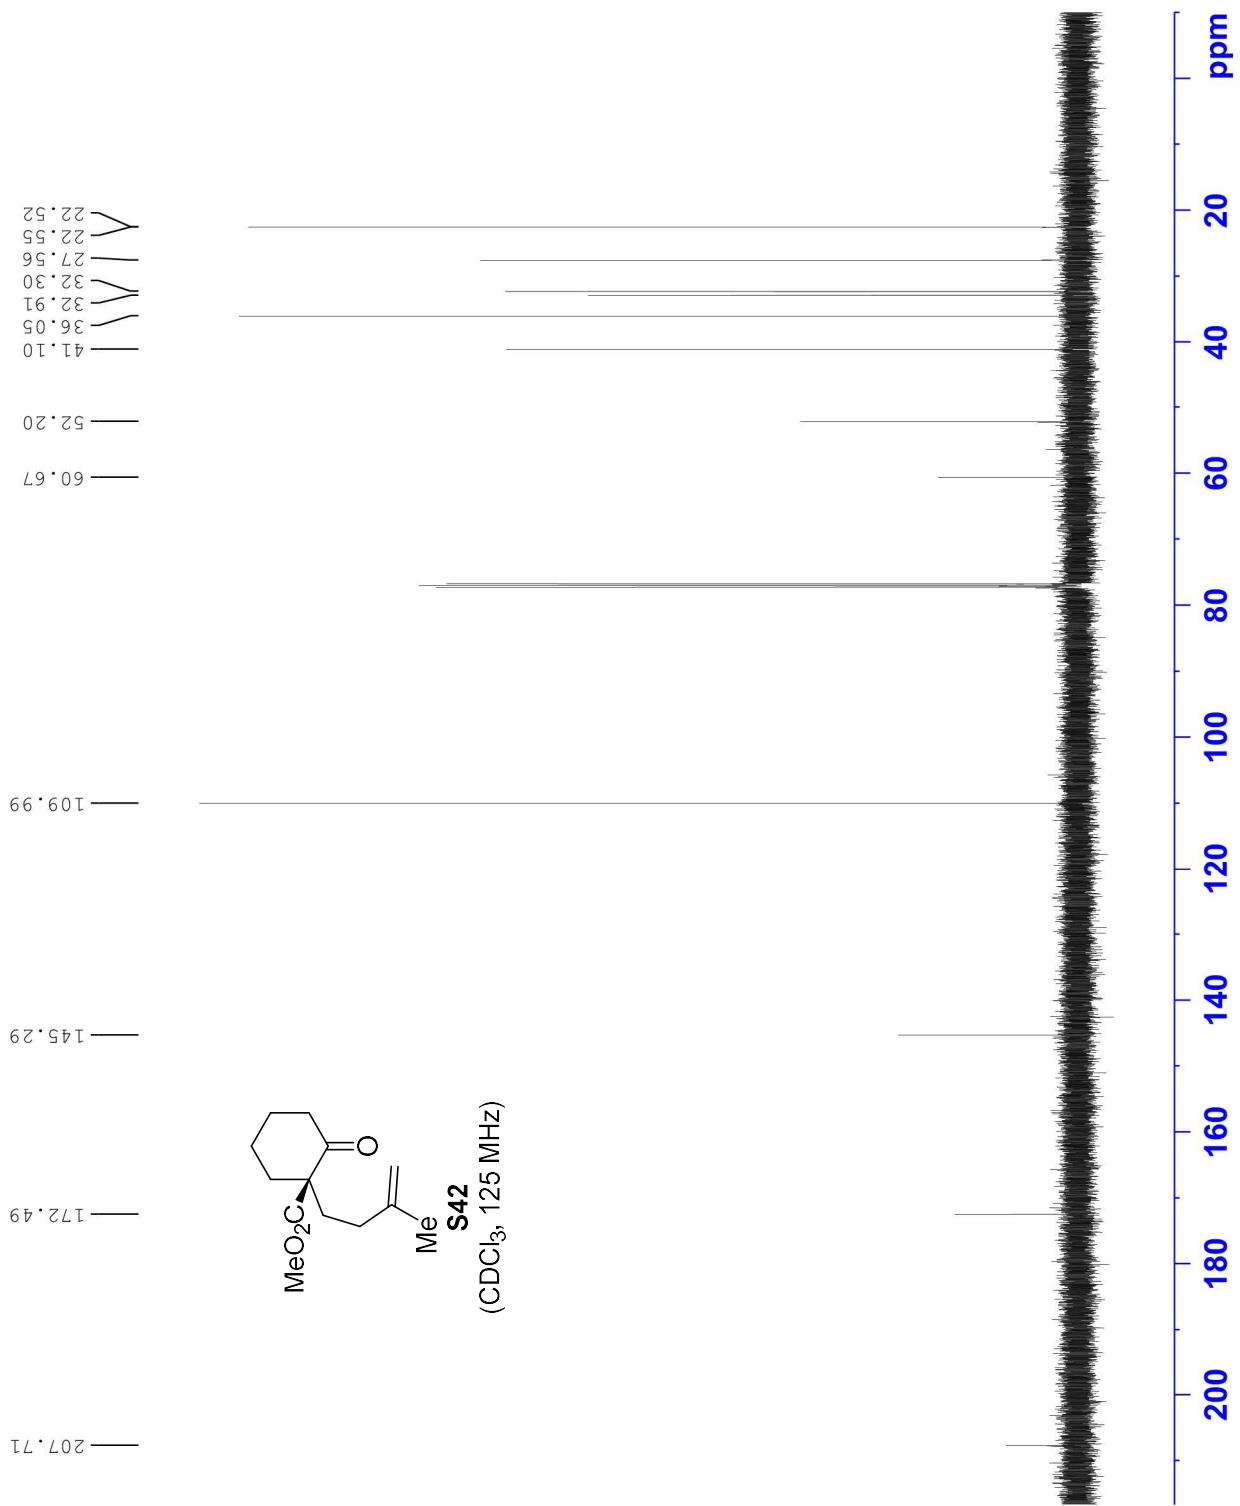

Current Data Parameters  
 NAME yh-4-22-a  
 EXPNO 1  
 PROCNO 1

F2 - Acquisition Parameters

Date\_ 20180812  
 Time\_ 20.18  
 INSTRUM spect  
 PROBHD 5 mm PATXI 1H/  
 PULPROG zg  
 TD 59998  
 SOLVENT CDC13  
 NS 8  
 DS 0  
 SWH 10000.000 Hz  
 FIDRES 0.166672 Hz  
 AQ 2.9999001 sec  
 RG 52.86  
 DW 50.000 usec  
 DE 10.00 usec  
 TE 294.2 K  
 D1 3.0000000 sec  
 TD0 1

==== CHANNEL f1 =====  
 SFO1 500.1330885 MHz  
 NUC1 1H  
 P1 2.67 usec  
 PLW1 12.1999981 W

F2 - Processing parameters  
 SI 65536  
 SF 500.1300136 MHz  
 WDW EM  
 SSB 0  
 LB 0.30 Hz  
 GB 0  
 PC 1.00

6.90  
6.89  
6.88  
6.88  
6.89  
6.90  
6.02  
6.00  
4.68  
3.68  
2.51  
2.50  
2.50  
2.49  
2.48  
2.48  
2.47  
2.46  
2.36  
2.36  
2.35  
2.35  
2.09  
2.08  
2.07  
2.06  
2.06  
2.06  
2.04  
1.98  
1.97  
1.96  
1.94  
1.87  
1.86  
1.86  
1.85  
1.84  
1.84  
1.84  
1.72

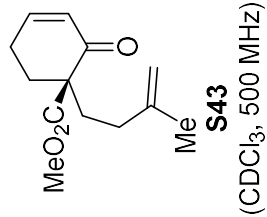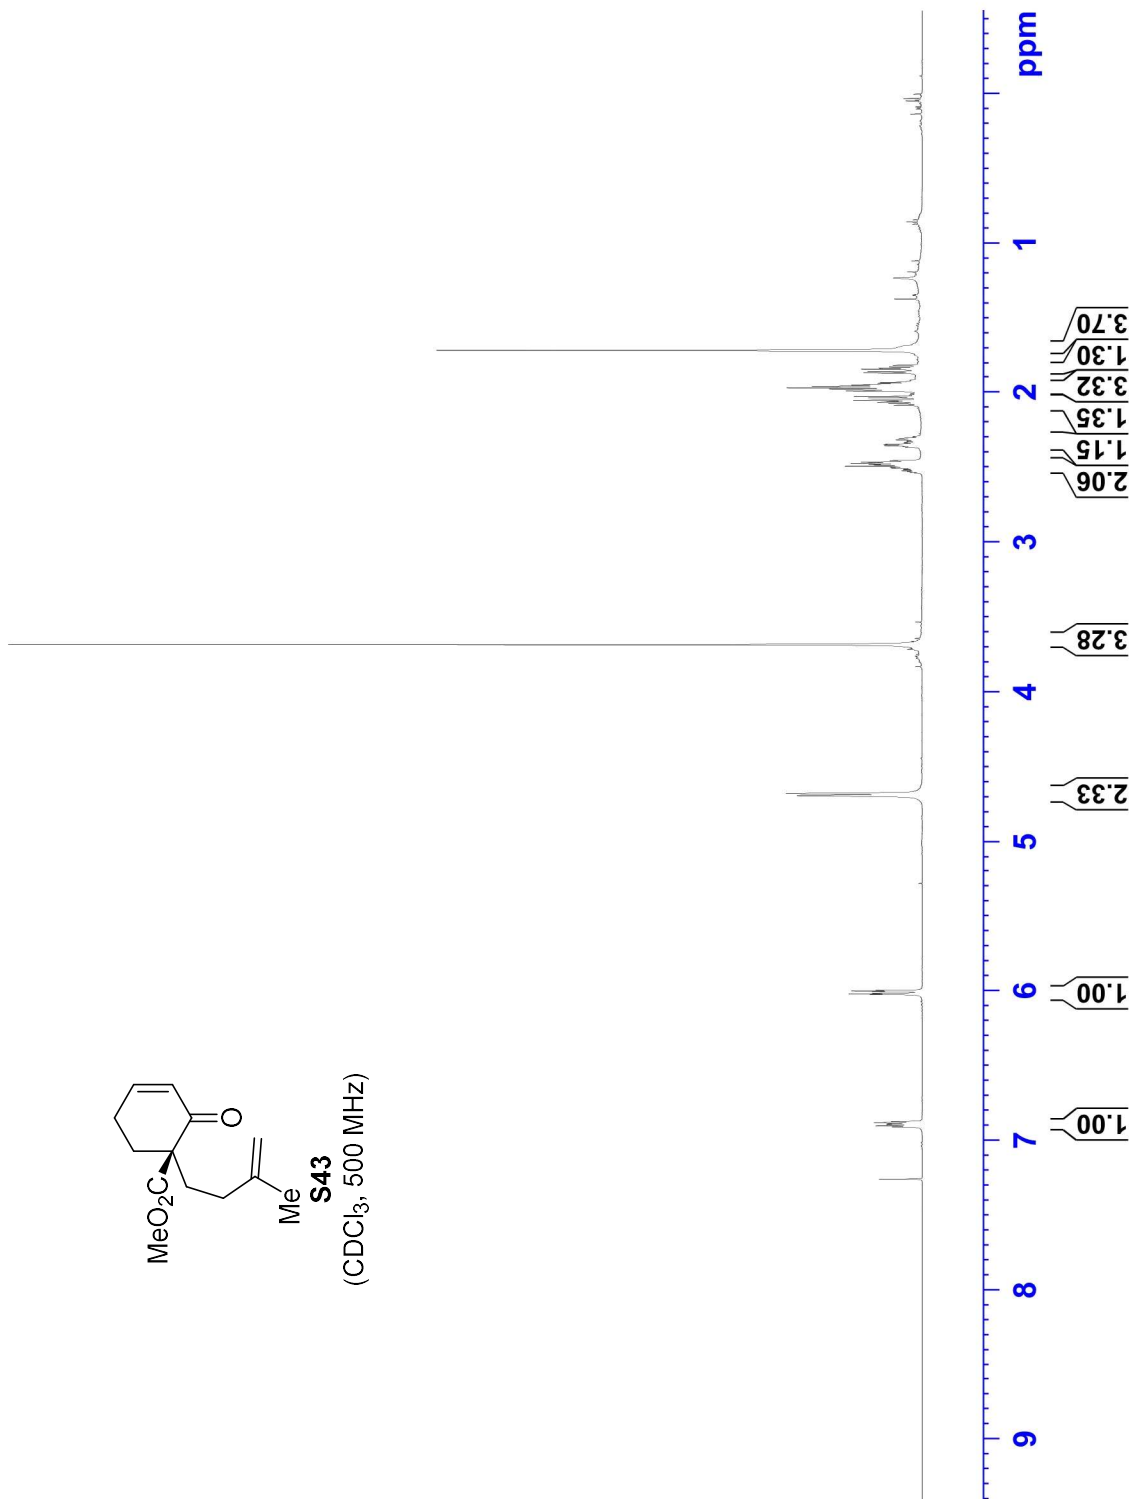

Current Data Parameters  
 NAME Yh-4-22-a  
 EXPNO 2  
 PROCNO 2

F2 - Acquisition Parameters

Date\_ 20180812  
 Time\_ 20.53  
 INSTRUM spect  
 PROBHD 5 mm PABBO BB/  
 PULPROG zgdc  
 TD 187496  
 SOLVENT CDC13  
 NS 23  
 DS 0  
 SWH 31250.000 Hz  
 FIDRES 0.166670 Hz  
 AQ 2.9999361 sec  
 RG 2050  
 DW 16.000 usec  
 DE 6.50 usec  
 TE 296.3 K  
 D1 3.00000000 sec  
 D11 0.03000000 sec  
 TD0 1

==== CHANNEL f1 =====  
 SFO1 125.7049802 MHz  
 NUC1 13C  
 P1 10.00 usec  
 PLW1 72.83999634 W

==== CHANNEL f2 =====  
 SFO2 499.8724993 MHz  
 NUC2 1H  
 CPDPRG[2] waltz16  
 PCPD2 80.00 usec  
 PLW2 19.00000000 W  
 PLW12 0.29688001 W

F2 - Processing parameters  
 SI 1048576  
 SF 125.6924115 MHz  
 WDW EM  
 SSB 0  
 LB 0.30 Hz  
 GB 0  
 PC 1.40

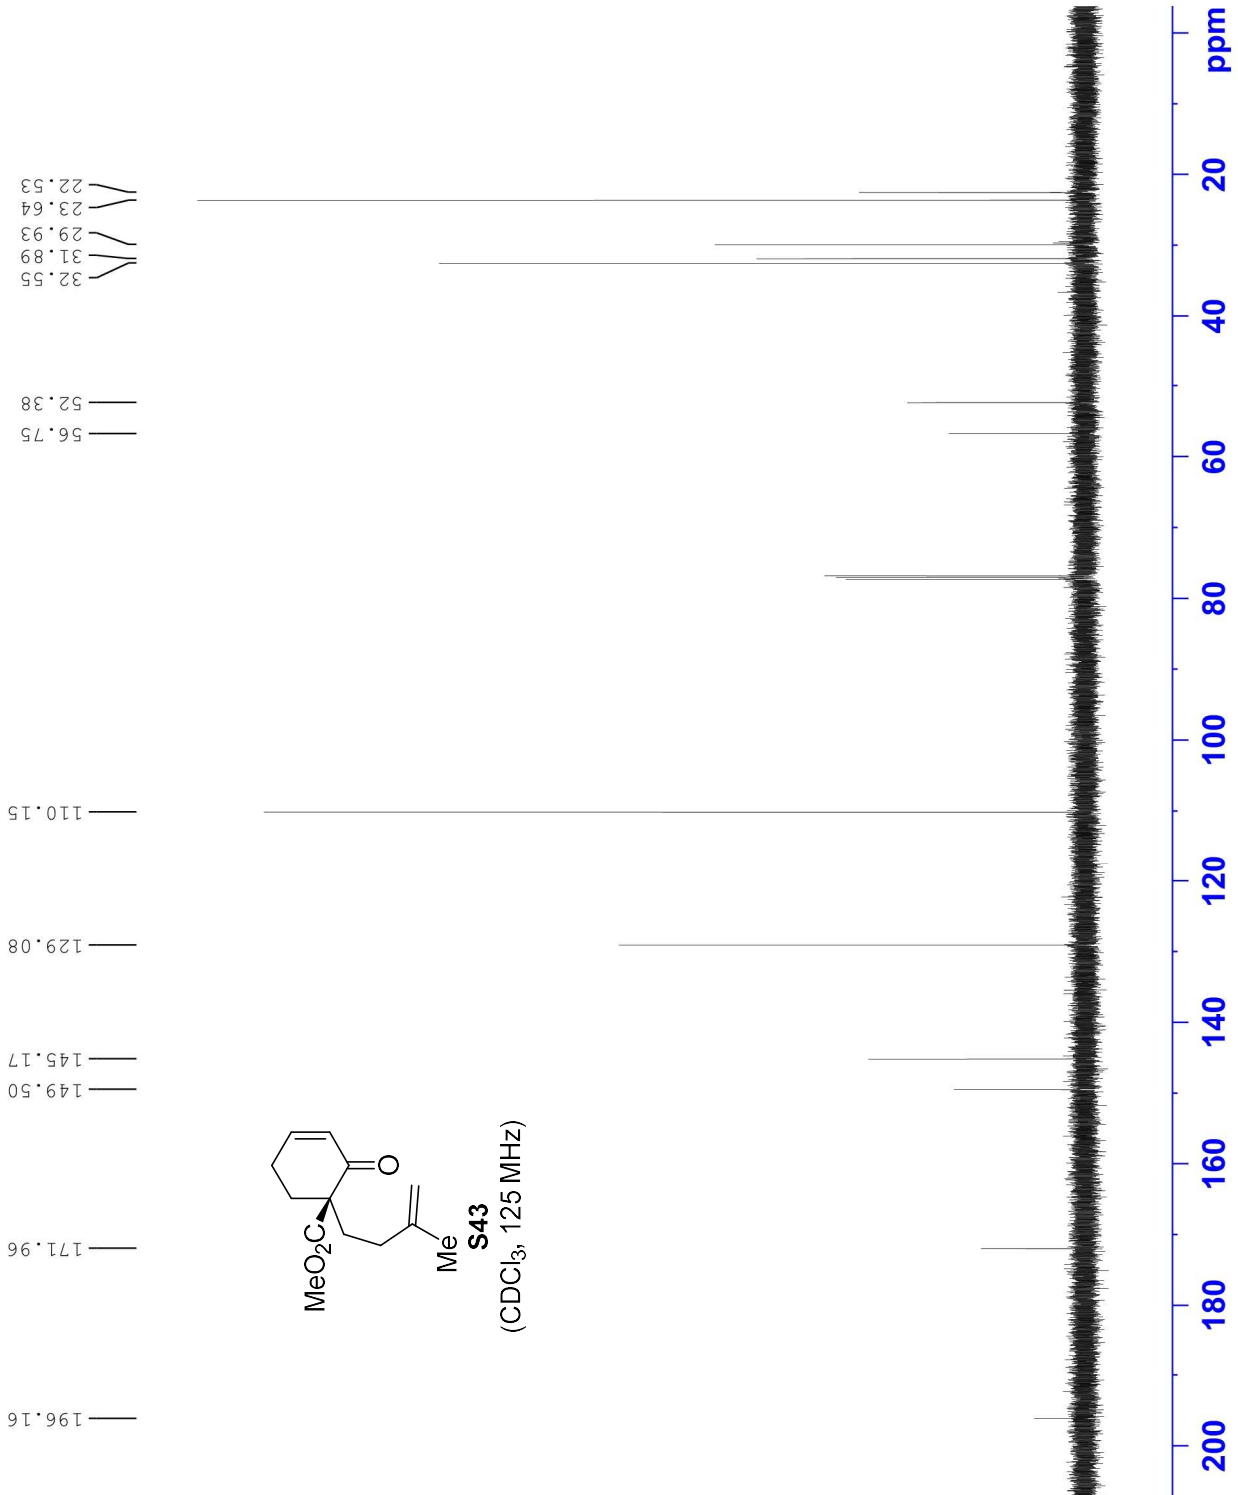

Current Data Parameters  
 NAME Yh-4-24-a  
 EXPNO 1  
 PROCNO 1

F2 - Acquisition Parameters

Date\_ 20180314  
 Time\_ 22.08  
 INSTRUM spect  
 PROBHD 5 mm PABBO BB/  
 PULPROG zg  
 TD 59998  
 SOLVENT CDC13  
 NS 8  
 DS 0  
 SWH 10000.000 Hz  
 FIDRES 0.166672 Hz  
 AQ 2.9999001 sec  
 RG 29.95  
 DW 50.000 usec  
 DE 6.50 usec  
 TE 296.7 K  
 D1 4.0000000 sec  
 TD0 1

==== CHANNEL f1 =====  
 SFO1 499.8730869 MHz  
 NUC1 1H  
 P1 3.58 usec  
 PLW1 18.25000000 W

F2 - Processing parameters  
 SI 32768  
 SF 499.8700123 MHz  
 EM  
 WDW 0  
 SSB 0  
 LB 0.30 Hz  
 GB 0  
 PC 1.00

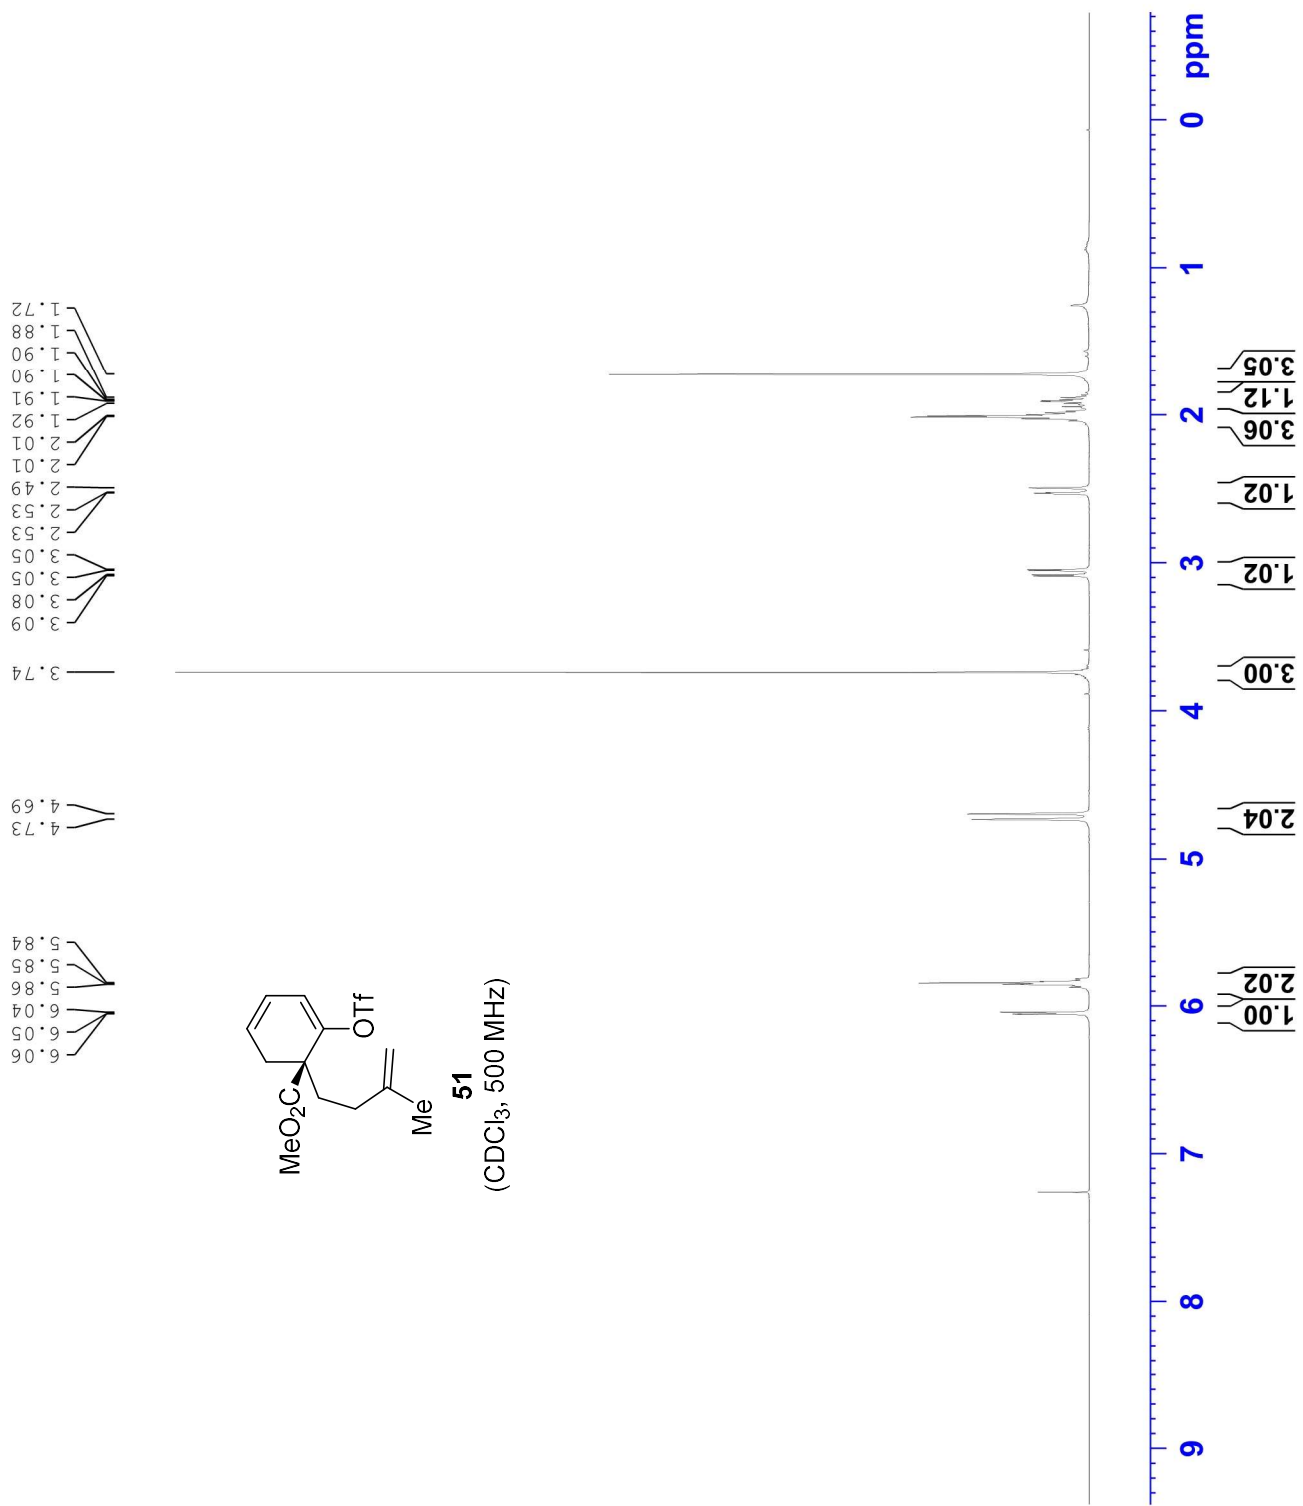



Current Data Parameters  
 NAME Yh-4-24-a  
 EXPNO 2  
 PROCNO 2

F2 - Acquisition Parameters

Date\_ 20180314  
 Time\_ 22.16  
 INSTRUM spect  
 PROBHD 5 mm PABBO BB/  
 PULPROG zgdc  
 TD 187496  
 SOLVENT CDC13  
 NS 2  
 DS 0  
 SWH 31250.000 Hz  
 FIDRES 0.166670 Hz  
 AQ 2.9999361 sec  
 RG 2050  
 DW 16.000 usec  
 DE 6.50 usec  
 TE 296.9 K  
 D1 3.00000000 sec  
 D11 0.03000000 sec  
 TD0 1

==== CHANNEL f1 =====  
 SFO1 125.7049802 MHz  
 NUC1 13C  
 P1 10.00 usec  
 PLW1 72.83999634 W

==== CHANNEL f2 =====  
 SFO2 499.8724993 MHz  
 NUC2 1H  
 CPDPRG[2] waltz16  
 PCPD2 80.00 usec  
 PLW2 19.00000000 W  
 PLW12 0.29688001 W

F2 - Processing parameters  
 SI 1048576  
 SF 125.6924115 MHz  
 WDW EM  
 SSB 0  
 LB 0.30 Hz  
 GB 0  
 PC 1.40

172.75  
 148.14  
 144.53  
 126.13  
 120.83  
 115.34  
 110.58  
 52.57  
 49.49  
 33.71  
 32.70  
 32.48  
 22.42

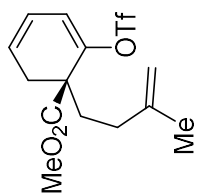

**51**  
 (CDCl<sub>3</sub>, 125 MHz)

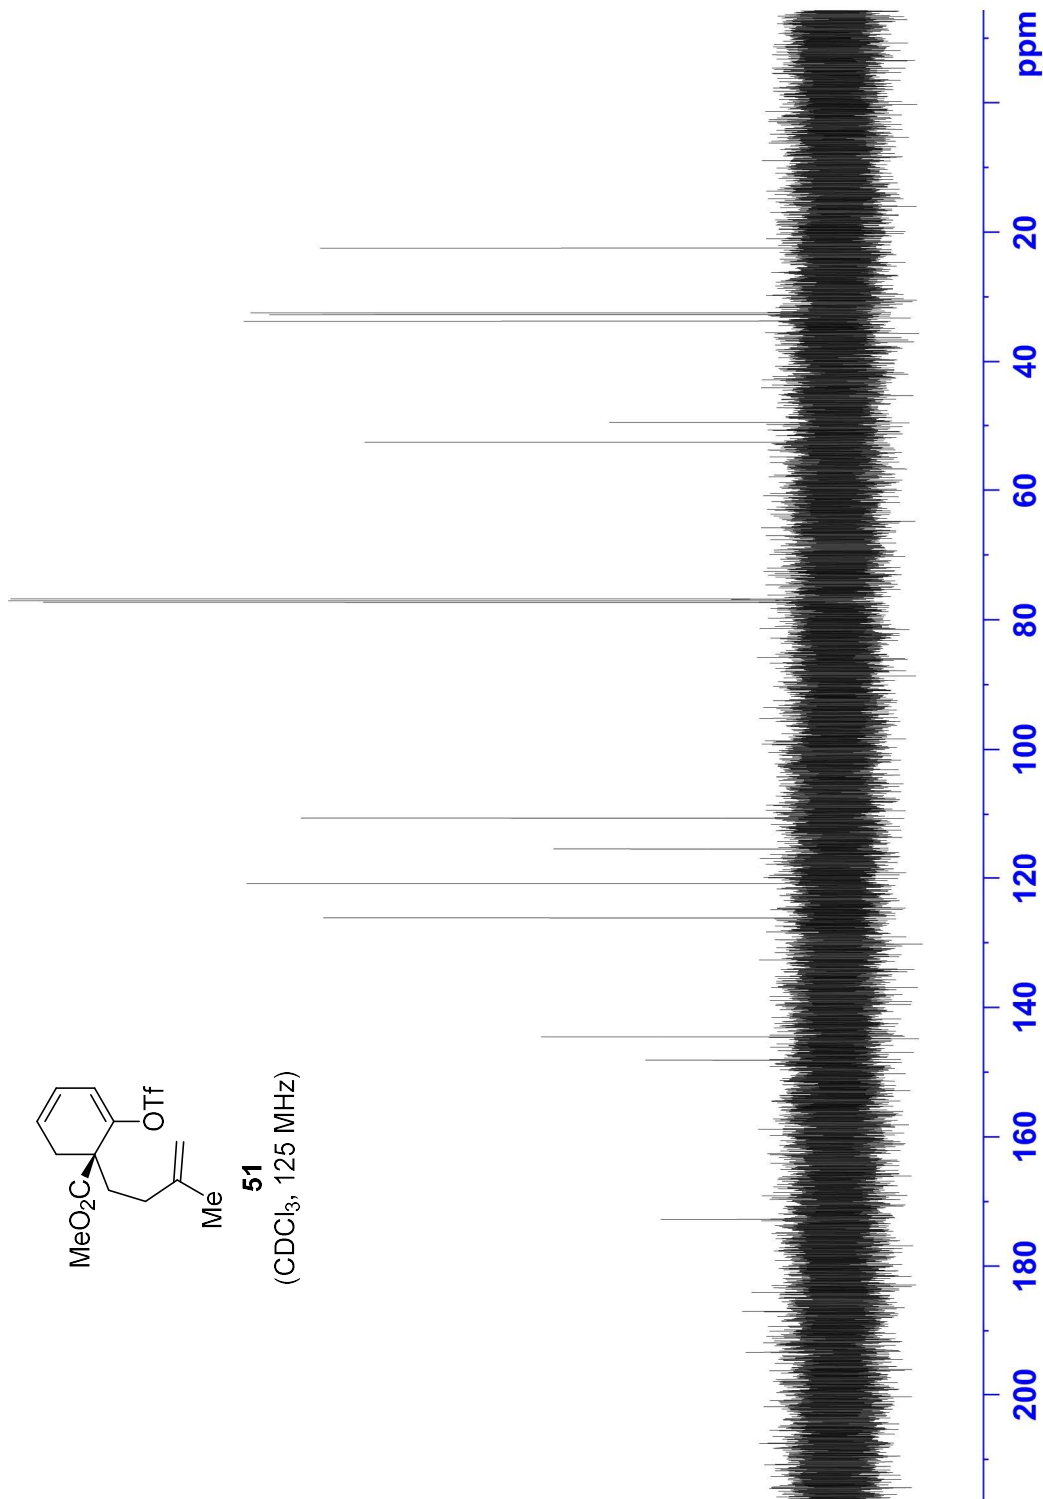

Current Data Parameters  
 NAME yh-4-25-2-a  
 EXPNO 2  
 PROCNO 2

F2 - Acquisition Parameters

Date\_ 20180313  
 Time\_ 21.11  
 INSTRUM spect  
 PROBHD 5 mm PABBO BB/  
 PULPROG zg  
 TD 59998  
 SOLVENT CDC13  
 NS 8  
 DS 0  
 SWH 10000.000 Hz  
 FIDRES 0.166672 Hz  
 AQ 2.9999001 sec  
 RG 51.11  
 DW 50.000 usec  
 DE 6.50 usec  
 TE 296.9 K  
 D1 4.0000000 sec  
 TD0 1

==== CHANNEL f1 =====  
 SFO1 499.8730869 MHz  
 NUC1 1H  
 P1 3.58 usec  
 PLW1 18.25000000 W

F2 - Processing parameters  
 SI 65536  
 SF 499.8700123 MHz  
 EM  
 WDW 0  
 SSB 0  
 LB 0.30 Hz  
 GB 0  
 PC 1.00

3.66  
3.34  
2.32  
2.06  
1.92  
1.91  
1.90  
1.88  
1.86  
1.84  
1.71  
1.69  
1.68  
1.67  
1.67  
1.67  
1.67  
1.65  
1.64  
1.64  
1.64  
1.64  
1.51  
1.50  
1.49  
1.30  
1.29  
1.16  
1.10

5.67  
5.65  
5.37  
5.37  
5.35  
5.35

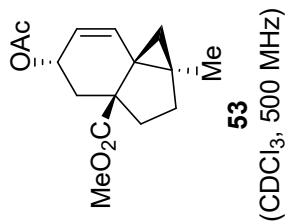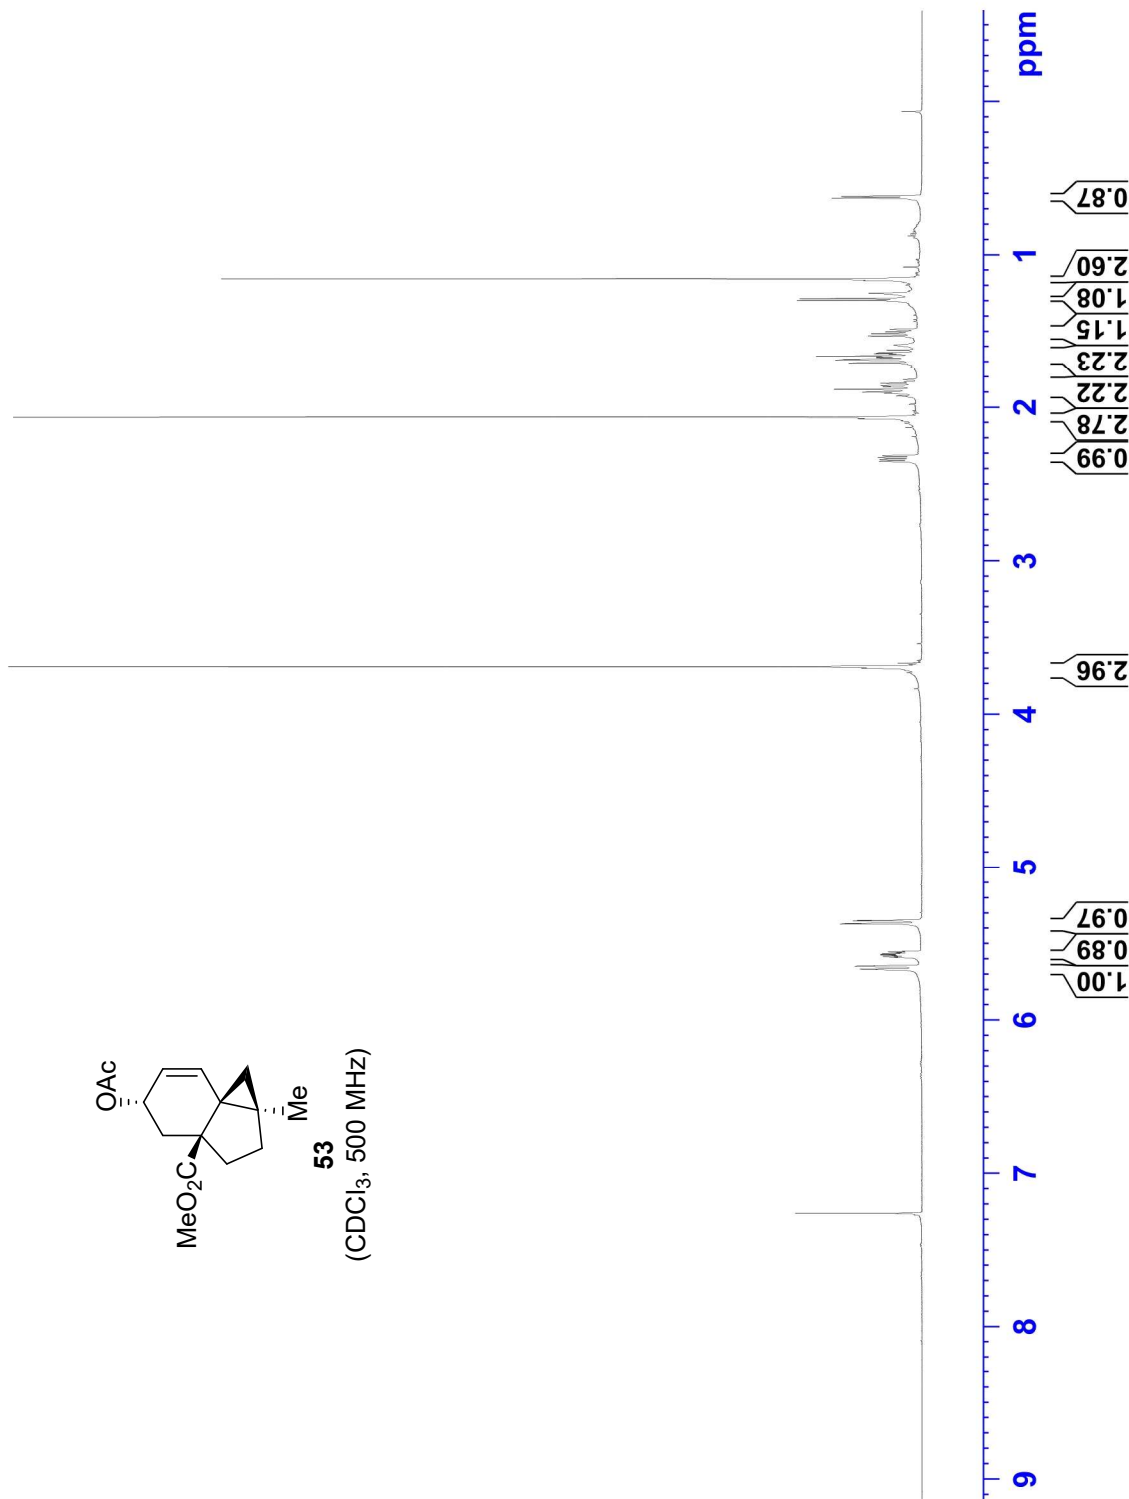

Current Data Parameters  
 NAME yh-4-25-2-a  
 EXPNO 3  
 PROCNO 3

F2 - Acquisition Parameters  
 Date\_ 20180313  
 Time\_ 21.47  
 INSTRUM spect  
 PROBHD 5 mm PABBO BB/  
 PULPROG zgdc  
 TD 187496  
 SOLVENT CDC13  
 NS 329  
 DS 0  
 SWH 31250.000 Hz  
 FIDRES 0.166670 Hz  
 AQ 2.9999361 sec  
 RG 2050  
 DW 16.000 usec  
 DE 6.50 usec  
 TE 298.5 K  
 D1 3.00000000 sec  
 D11 0.03000000 sec  
 TD0 1

==== CHANNEL f1 =====  
 SFO1 125.7049802 MHz  
 NUC1 13C  
 P1 10.00 usec  
 PLW1 72.83999634 W

==== CHANNEL f2 =====  
 SFO2 499.8724993 MHz  
 NUC2 1H  
 CPDPRG[2] waltz16  
 PCPD2 80.00 usec  
 PLW2 19.00000000 W  
 PLW12 0.29688001 W

F2 - Processing parameters  
 SI 1048576  
 SF 125.6924115 MHz  
 WDW 0  
 SSB 0  
 LB 0.30 Hz  
 GB 0  
 PC 1.40

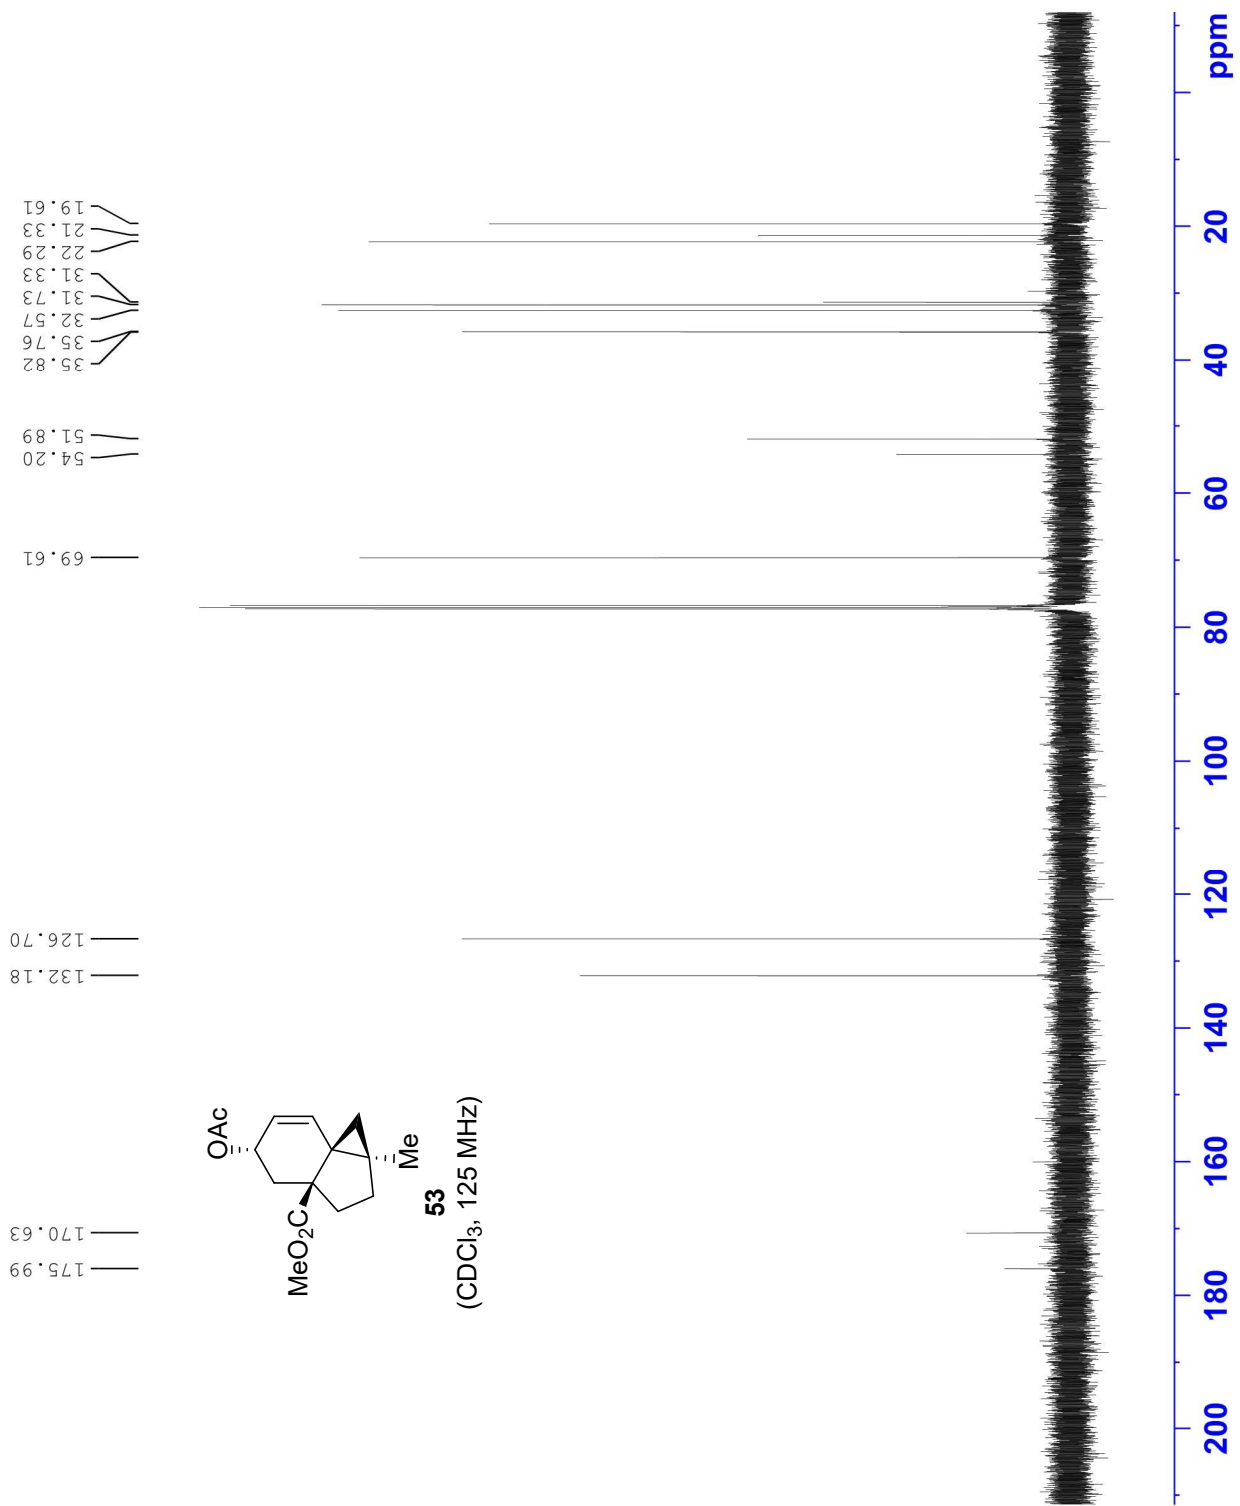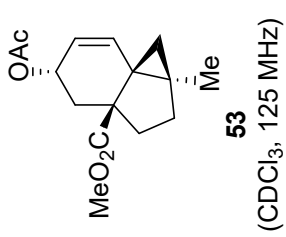

Current Data Parameters  
 NAME yh-4-121  
 EXPNO 1  
 PROCNO 1

F2 - Acquisition Parameters

Date\_ 20180725  
 Time\_ 21.16  
 INSTRUM spect  
 PROBHD 5 mm PABBO BB/  
 PULPROG zg  
 TD 59998  
 SOLVENT CDC13  
 NS 3  
 DS 0  
 SWH 10000.000 Hz  
 FIDRES 0.166672 Hz  
 AQ 2.9999001 sec  
 RG 105.66  
 DW 50.000 usec  
 DE 6.50 usec  
 TE 296.5 K  
 D1 4.0000000 sec  
 TD0 1

==== CHANNEL f1 =====  
 SFO1 499.8730869 MHz  
 NUC1 1H  
 P1 3.58 usec  
 PLW1 18.25000000 W

F2 - Processing parameters  
 SI 65536  
 SF 499.8700122 MHz  
 EM  
 WDW 0  
 SSB 0  
 LB 0.30 Hz  
 GB 0  
 PC 1.00

2.75  
2.74  
2.72  
2.40  
2.39  
2.39  
2.17  
2.15  
2.00  
1.97  
1.90  
1.90  
1.89  
1.78  
1.18  
1.17  
1.05  
1.01

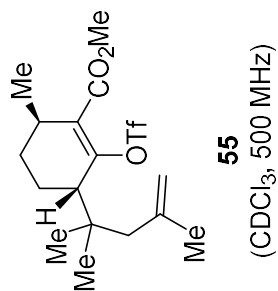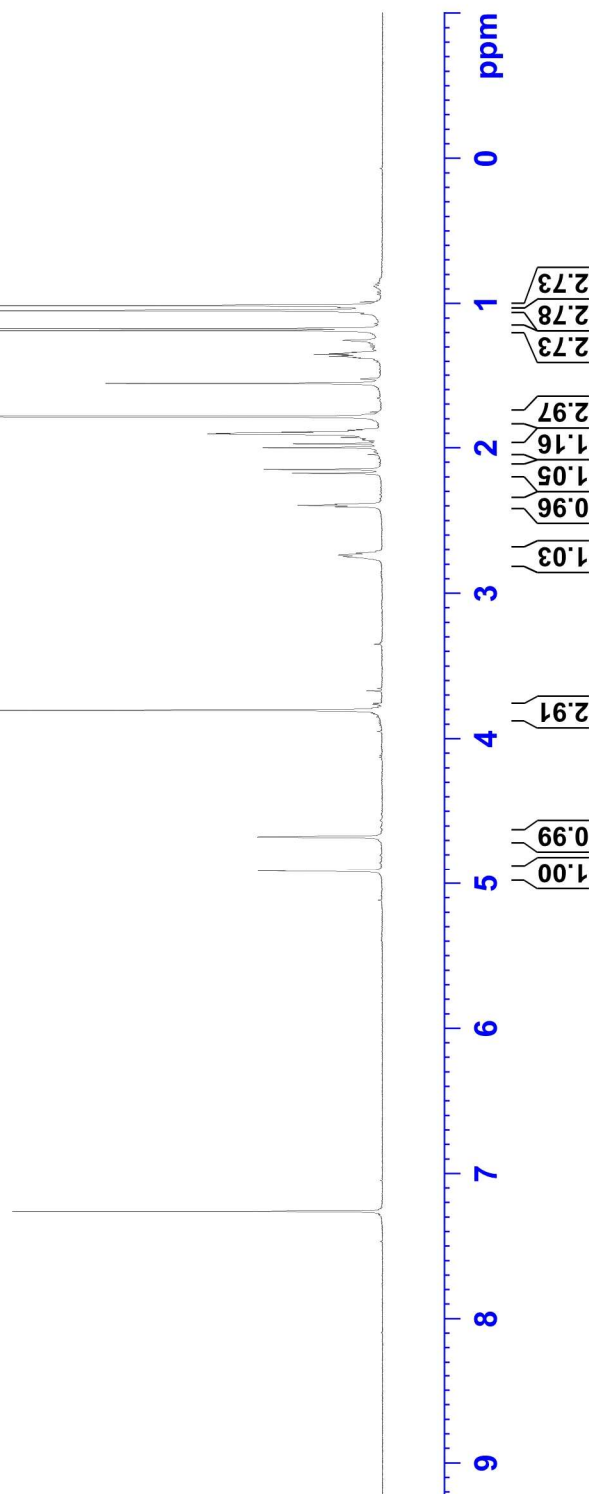

165.60  
151.44  
142.47  
131.95  
122.13  
119.58  
117.04  
115.32  
114.49

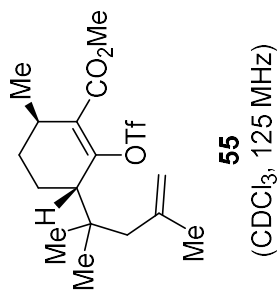

52.00  
48.20  
45.94  
38.99  
31.50  
27.51  
27.25  
26.60  
25.47  
22.31  
20.89

Current Data Parameters  
 NAME Yh-4-121  
 EXPNO 2  
 PROCNO 2

F2 - Acquisition Parameters  
 Date\_ 20180726  
 Time\_ 7.14  
 INSTRUM spect  
 PROBHD 5 mm PABBO BB/  
 PULPROG zgdc  
 TD 187496  
 SOLVENT CDC13  
 NS 5000  
 DS 0  
 SWH 31250.000 Hz  
 FIDRES 0.166670 Hz  
 AQ 2.9999361 sec  
 RG 2050  
 DW 16.000 usec  
 DE 6.50 usec  
 TE 298.4 K  
 D1 3.00000000 sec  
 D11 0.03000000 sec  
 TD0 1

==== CHANNEL f1 =====  
 SFO1 125.7049802 MHz  
 NUC1 13C  
 P1 10.00 usec  
 PLW1 72.83999634 W

==== CHANNEL f2 =====  
 SFO2 499.8724993 MHz  
 NUC2 1H  
 CPDPRG[2] waltz16  
 PCPD2 80.00 usec  
 PLW2 19.00000000 W  
 PLW12 0.29688001 W

F2 - Processing parameters  
 SI 1048576  
 SF 125.6924115 MHz  
 WDW EM  
 SSB 0  
 LB 0.30 Hz  
 GB 0  
 PC 1.40

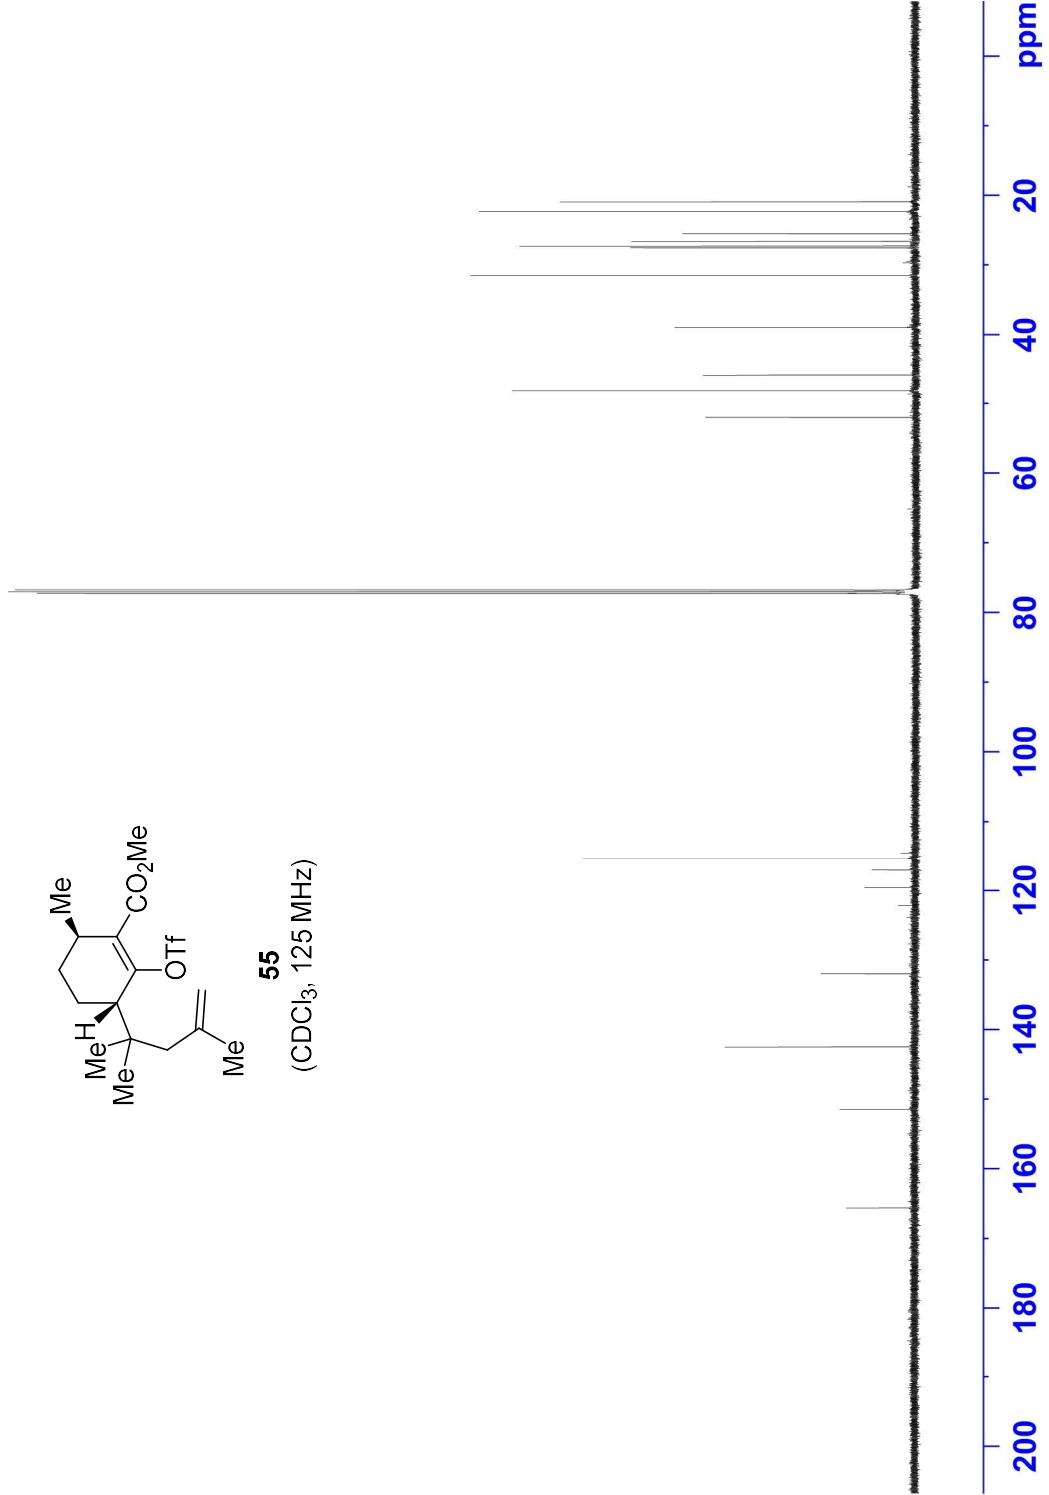

Current Data Parameters  
 NAME yh-5-48  
 EXPNO 1  
 PROCNO 1

F2 - Acquisition Parameters

Date\_ 20180809  
 Time\_ 21.01  
 INSTRUM spect  
 PROBHD 5 mm PABBO BB/  
 PULPROG zg  
 TD 59998  
 SOLVENT CDC13  
 NS 3  
 DS 0  
 SWH 10000.000 Hz  
 FIDRES 0.166672 Hz  
 AQ 2.9999001 sec  
 RG 51.11  
 DW 50.000 usec  
 DE 6.50 usec  
 TE 296.3 K  
 D1 4.0000000 sec  
 TD0 1

==== CHANNEL f1 =====  
 SFO1 499.8730869 MHz  
 NUC1 1H  
 P1 3.58 usec  
 PLW1 18.25000000 W

F2 - Processing parameters  
 SI 65536  
 SF 499.8700123 MHz  
 EM  
 WDW 0  
 SSB 0  
 LB 0.30 Hz  
 GB 0  
 PC 1.00

4.25  
4.23  
4.06  
4.04  
3.71  
2.55  
2.54  
2.53  
2.52  
2.51  
2.50  
2.15  
2.14  
2.13  
2.12  
2.11  
2.05  
1.92  
1.91  
1.90  
1.89  
1.74  
1.71  
1.71  
1.70  
1.69  
1.68  
1.66  
1.41  
1.38  
1.25  
1.24  
1.20  
1.19  
1.17  
1.11  
1.00  
0.91  
0.90

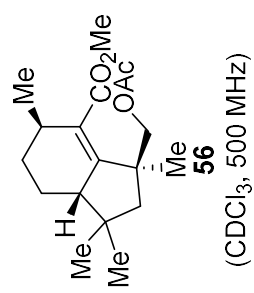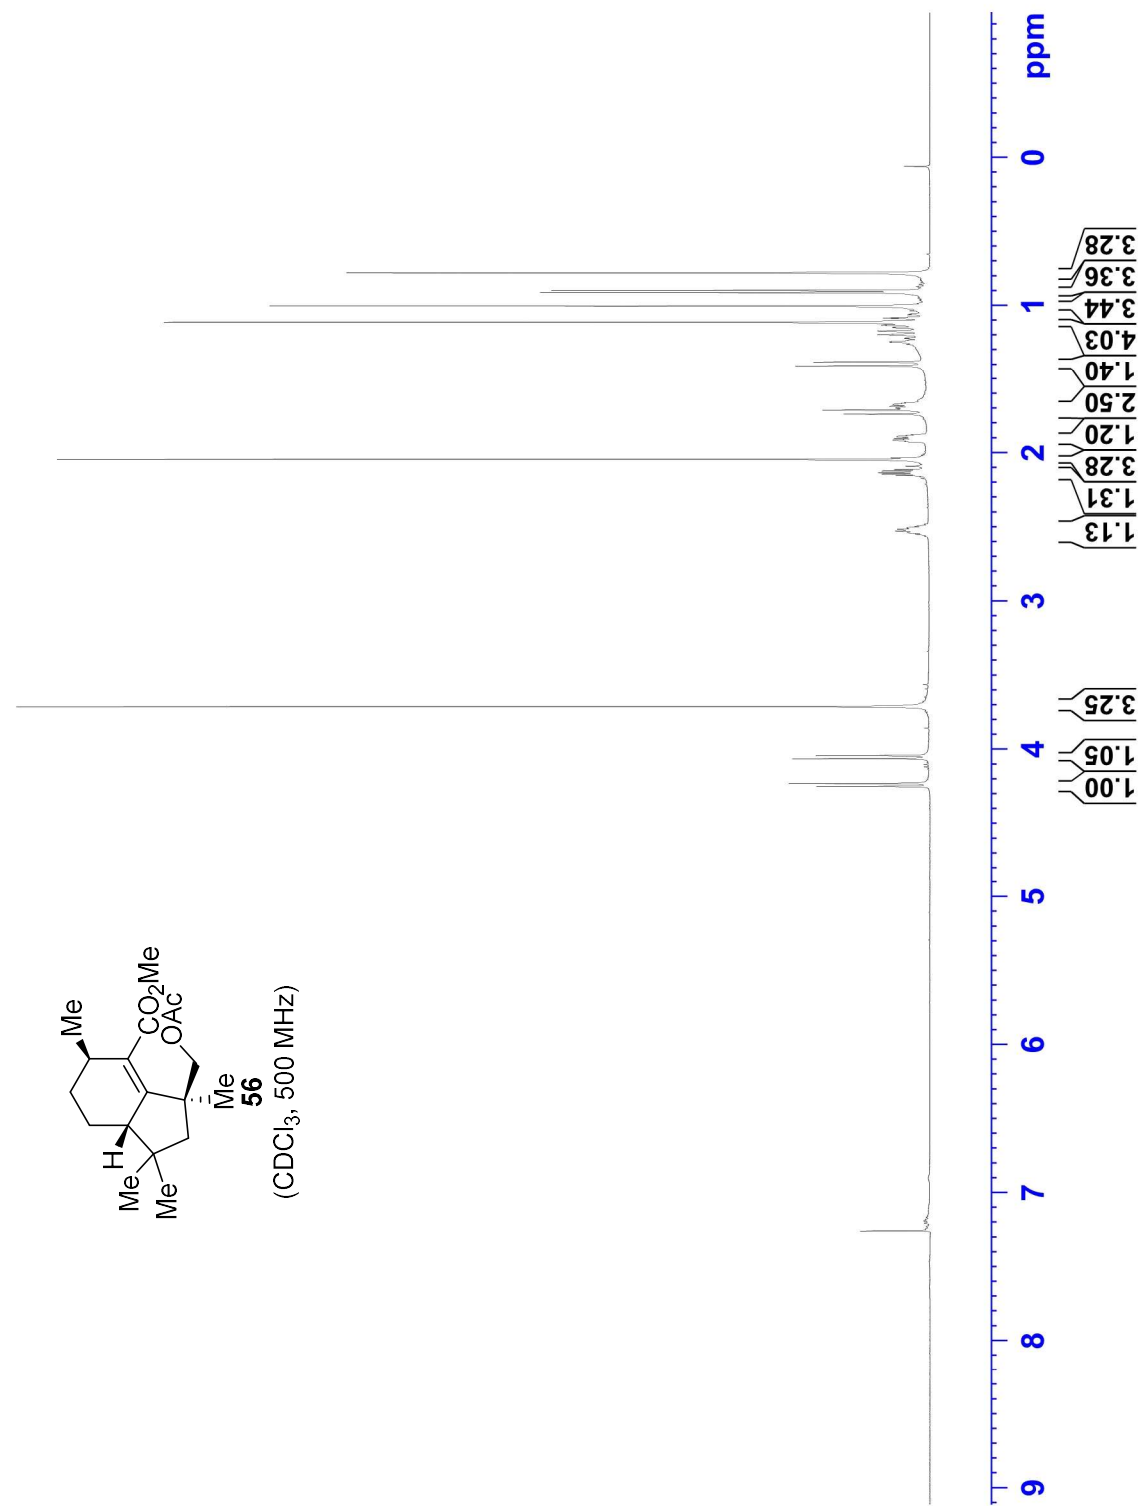

Current Data Parameters  
 NAME Yh-5-48  
 EXPNO 2  
 PROCNO 2

F2 - Acquisition Parameters  
 Date\_ 20180809  
 Time\_ 21.22  
 INSTRUM spect  
 PROBHD 5 mm PABBO BB/  
 PULPROG zgdc  
 TD 187496  
 SOLVENT CDC13  
 NS 149  
 DS 0  
 SWH 31250.000 Hz  
 FIDRES 0.166670 Hz  
 AQ 2.9999361 sec  
 RG 2050  
 DW 16.000 usec  
 DE 6.50 usec  
 TE 297.3 K  
 D1 3.0000000 sec  
 D11 0.0300000 sec  
 TD0 1

==== CHANNEL f1 =====  
 SFO1 125.7049802 MHz  
 NUC1 13C  
 P1 10.00 usec  
 PLW1 72.83999634 W

==== CHANNEL f2 =====  
 SFO2 499.8724993 MHz  
 NUC2 1H  
 CPDPRG[2] waltz16  
 PCPD2 80.00 usec  
 PLW2 19.00000000 W  
 PLW12 0.29688001 W

F2 - Processing parameters  
 SI 1048576  
 SF 125.6924115 MHz  
 WDW EM  
 SSB 0  
 LB 0.30 Hz  
 GB 0  
 PC 1.40

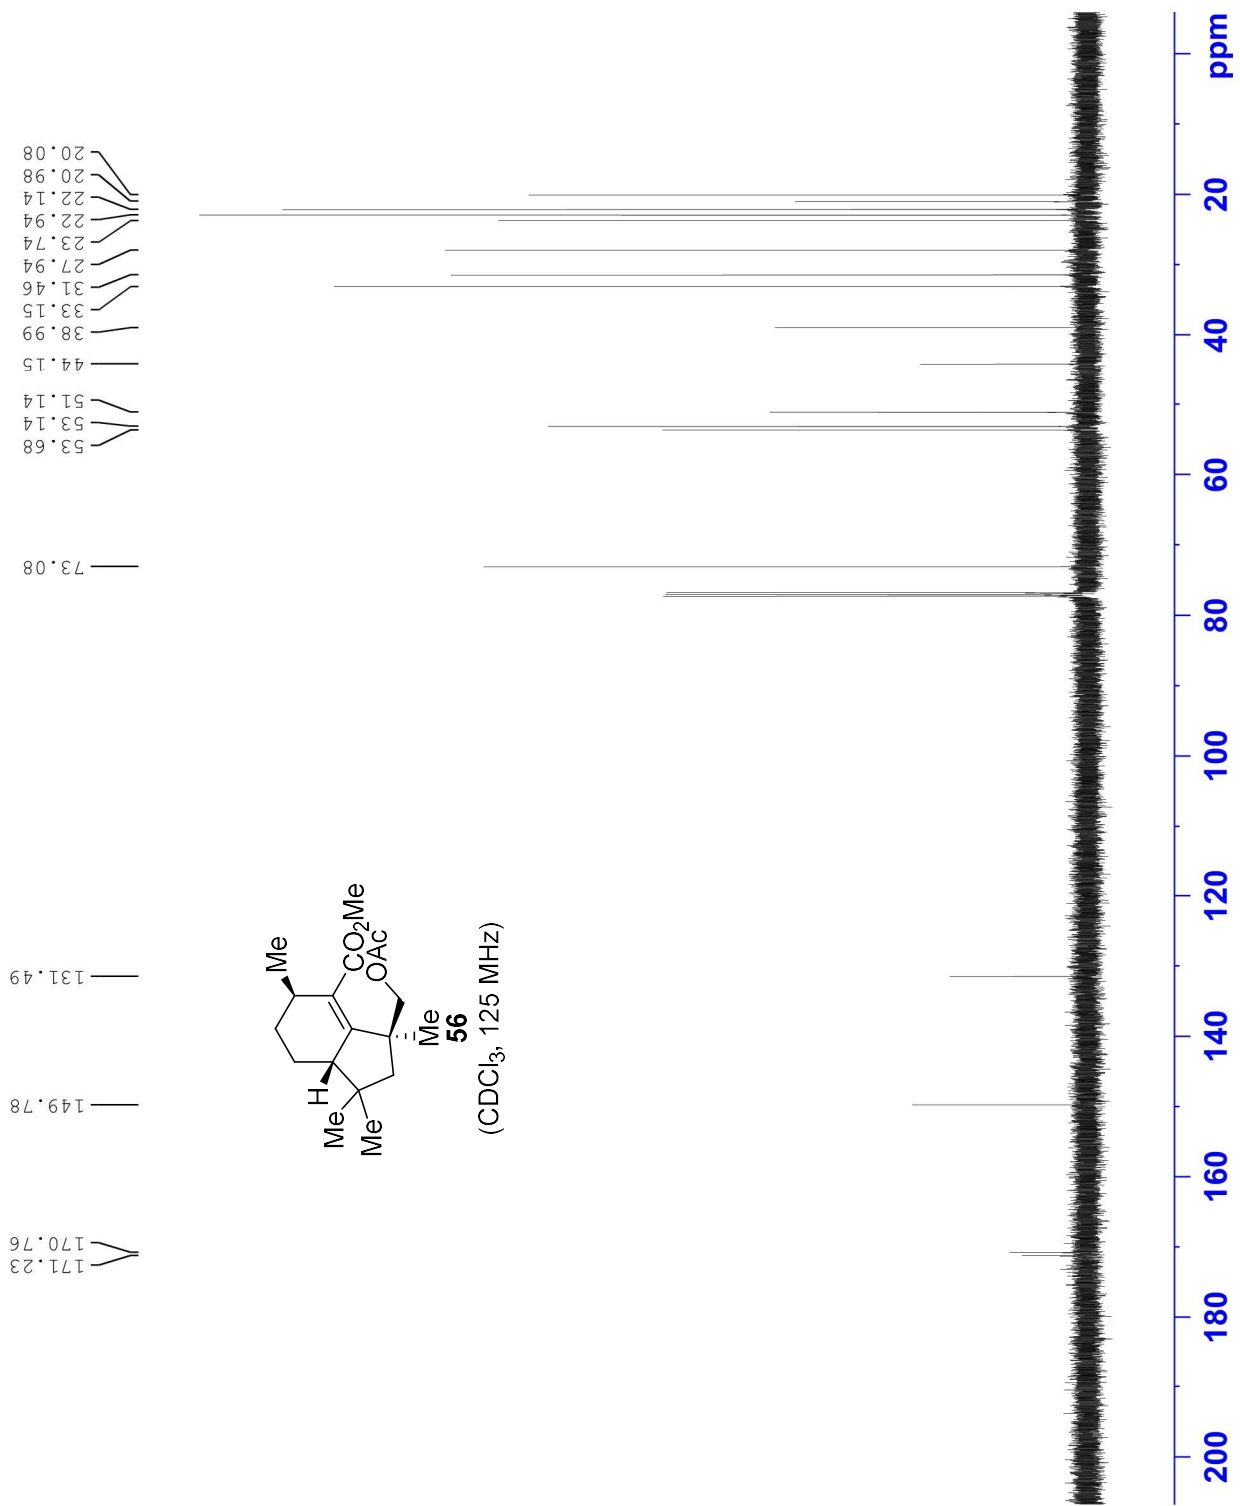

Current Data Parameters  
 NAME Yh-4-57-b  
 EXPNO 1  
 PROCNO 1

F2 - Acquisition Parameters

Date\_ 20180803  
 Time\_ 11.05  
 INSTRUM spect  
 PROBHD 5 mm PATXI 1H/  
 PULPROG zg  
 TD 59998  
 SOLVENT CDCl3  
 NS 8  
 DS 0  
 SWH 10000.000 Hz  
 FIDRES 0.166672 Hz  
 AQ 2.9999001 sec  
 RG 110.37  
 DW 50.000 usec  
 DE 10.00 usec  
 TE 294.1 K  
 D1 3.0000000 sec  
 TD0 1

==== CHANNEL f1 =====  
 SFO1 500.1330885 MHz  
 NUC1 1H  
 P1 2.67 usec  
 PLW1 12.19999981 W

F2 - Processing parameters  
 SI 65536  
 SF 500.1300137 MHz  
 EM  
 WDW 0  
 SSB 0  
 LB 0.30 Hz  
 GB 0  
 PC 1.00

4.09  
4.06  
4.02  
4.00  
2.76  
2.76  
2.75  
2.75  
2.75  
2.74  
2.74  
2.74  
2.73  
2.73  
2.47  
2.47  
2.46  
2.45  
2.45  
2.45  
2.44  
2.44  
2.43  
1.66  
1.65  
1.65  
1.65  
1.64  
1.62  
1.62  
1.62  
1.59  
1.59  
1.57  
1.54  
1.51  
1.48  
1.40  
1.36  
1.35  
1.34  
1.34  
1.33  
1.24  
1.16  
1.02

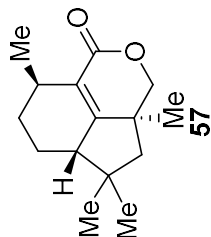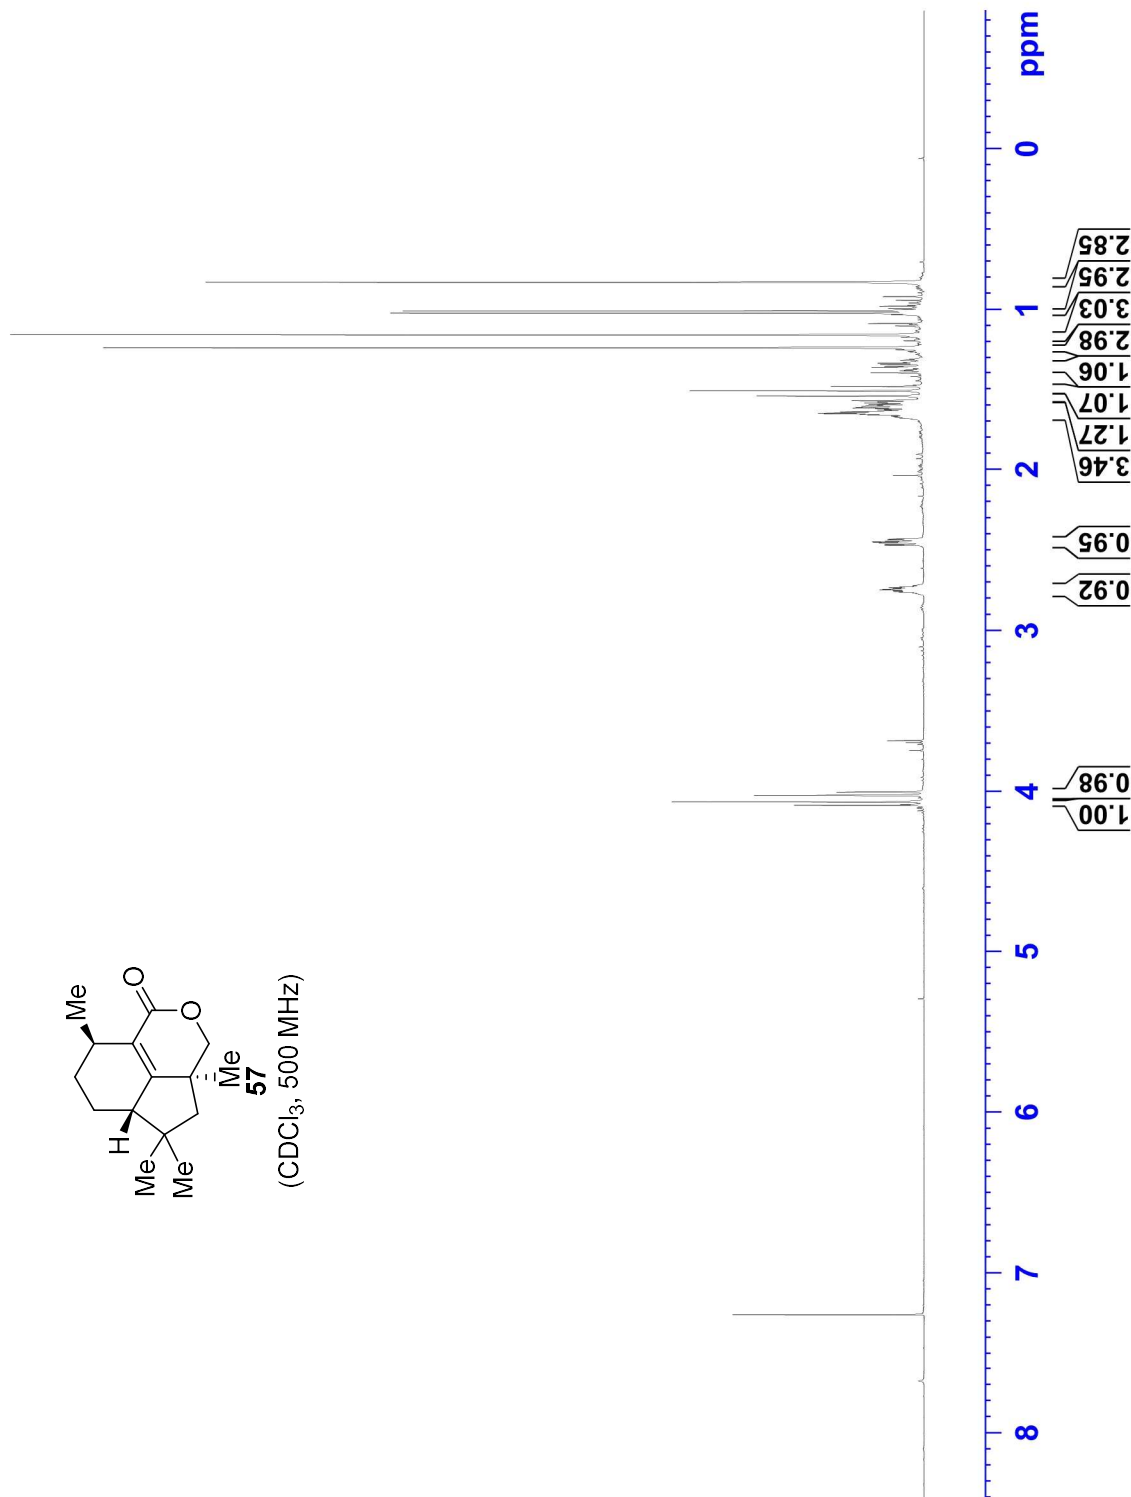



166.48  
164.23  
124.58  
76.70  
50.45  
49.12  
41.65  
38.40  
29.31  
29.25  
25.86  
25.07  
25.01  
19.31  
16.06

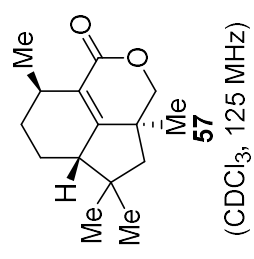

Current Data Parameters  
 NAME yh-4-57-b  
 EXPNO 2  
 PROCNO 2

F2 - Acquisition Parameters  
 Date\_ 20180803  
 Time 16.18  
 INSTRUM spect  
 PROBHD 5 mm PAQNP 1H/  
 PULPROG zgpg  
 TD 197364  
 SOLVENT CDC13  
 NS 91  
 DS 4  
 SWH 32894.738 Hz  
 FIDRES 0.166670 Hz  
 AQ 2.9999328 sec  
 RG 2050  
 DW 15.200 usec  
 DE 6.00 usec  
 TE 294.9 K  
 D1 10.00000000 sec  
 D11 0.03000000 sec  
 TD0 1

==== CHANNEL f1 =====  
 NUC1 13C  
 P1 8.00 usec  
 PL1 1.00 dB  
 PL1W 72.42802429 W  
 SF01 125.7716224 MHz

==== CHANNEL f2 =====  
 CPDPRG[2] waltz16  
 NUC2 1H  
 PCPD2 80.00 usec  
 PL2 0 dB  
 PL12 16.50 dB  
 PL13 17.00 dB  
 PL2W 24.54113007 W  
 PL12W 0.54940748 W  
 PL13W 0.48965994 W  
 SFO2 500.1325006 MHz

F2 - Processing parameters  
 SI 131072  
 SF 125.7577890 MHz  
 WDW EM  
 SSB 0  
 LB 0.30 Hz  
 GB 0  
 PC 1.40

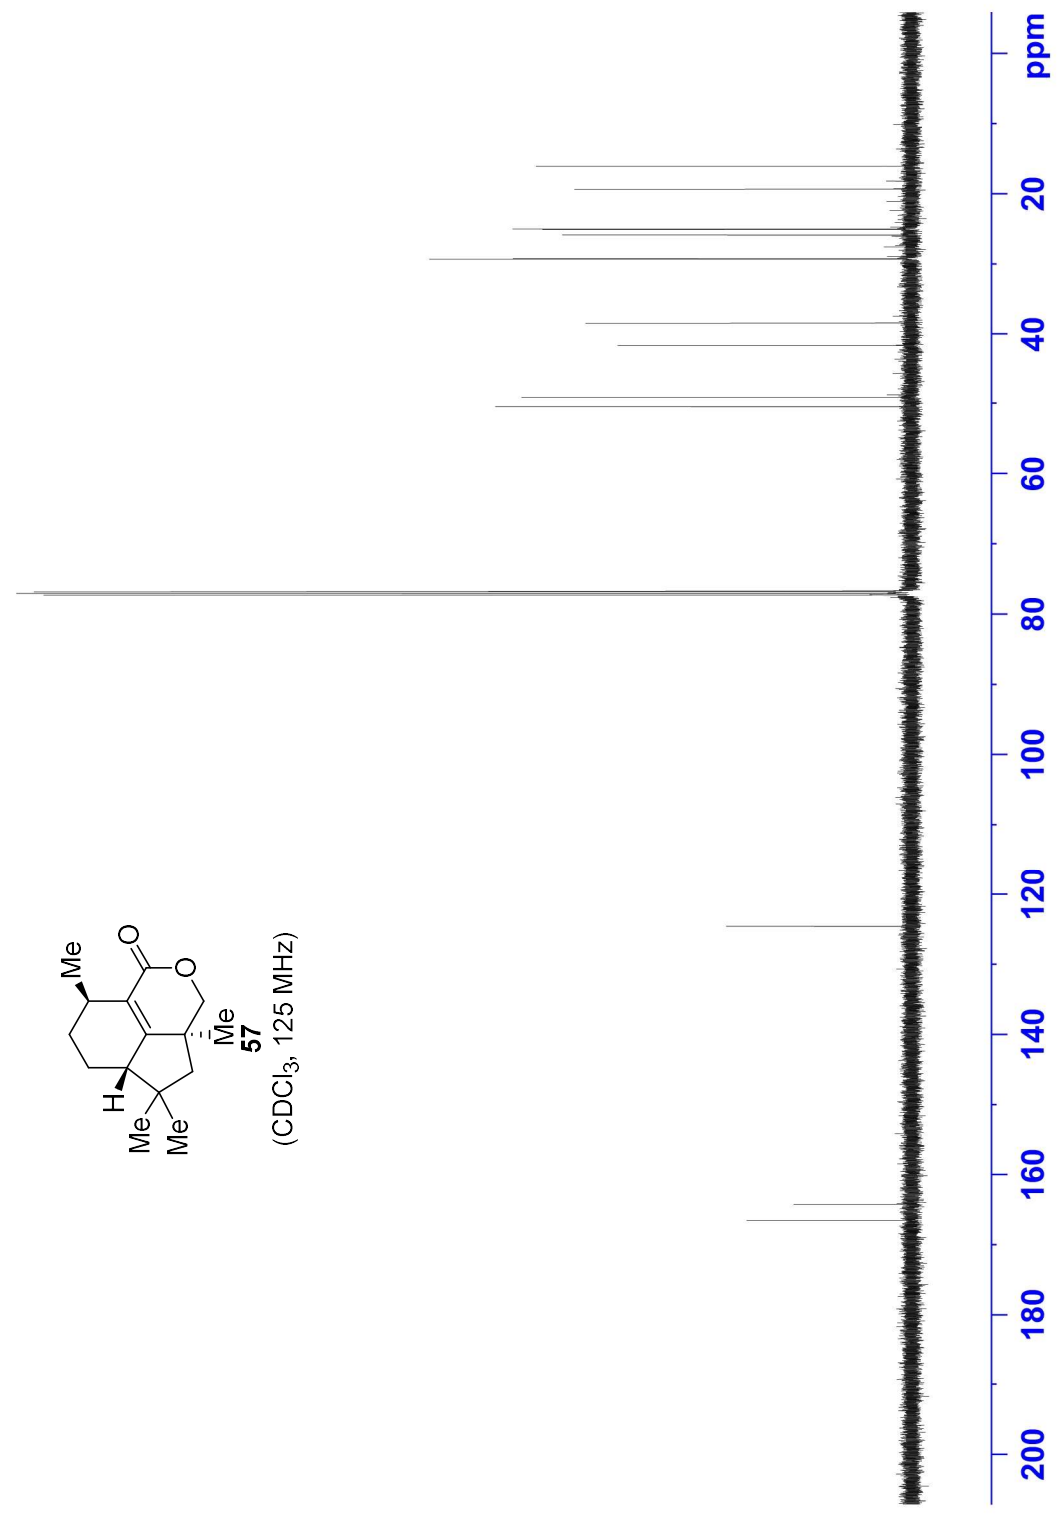

Current Data Parameters  
 NAME yh-5-47  
 EXPNO 1  
 PROCNO 1

F2 - Acquisition Parameters  
 Date\_ 20180804  
 Time\_ 22.32  
 INSTRUM spect  
 PROBHD 5 mm PATXI 1H/  
 PULPROG zg  
 TD 59998  
 SOLVENT CDC13  
 NS 2  
 DS 0  
 SWH 10000.000 Hz  
 FIDRES 0.166672 Hz  
 AQ 2.9999001 sec  
 RG 196.79  
 DW 50.000 usec  
 DE 10.00 usec  
 TE 294.4 K  
 D1 3.0000000 sec  
 TD0 1

==== CHANNEL f1 =====  
 SFO1 500.1330885 MHz  
 NUC1 1H  
 P1 2.67 usec  
 PLW1 12.19999981 W

F2 - Processing parameters  
 SI 65536  
 SF 500.1300138 MHz  
 EM  
 WDW 0  
 SSB 0  
 LB 0.30 Hz  
 GB 0  
 PC 1.00

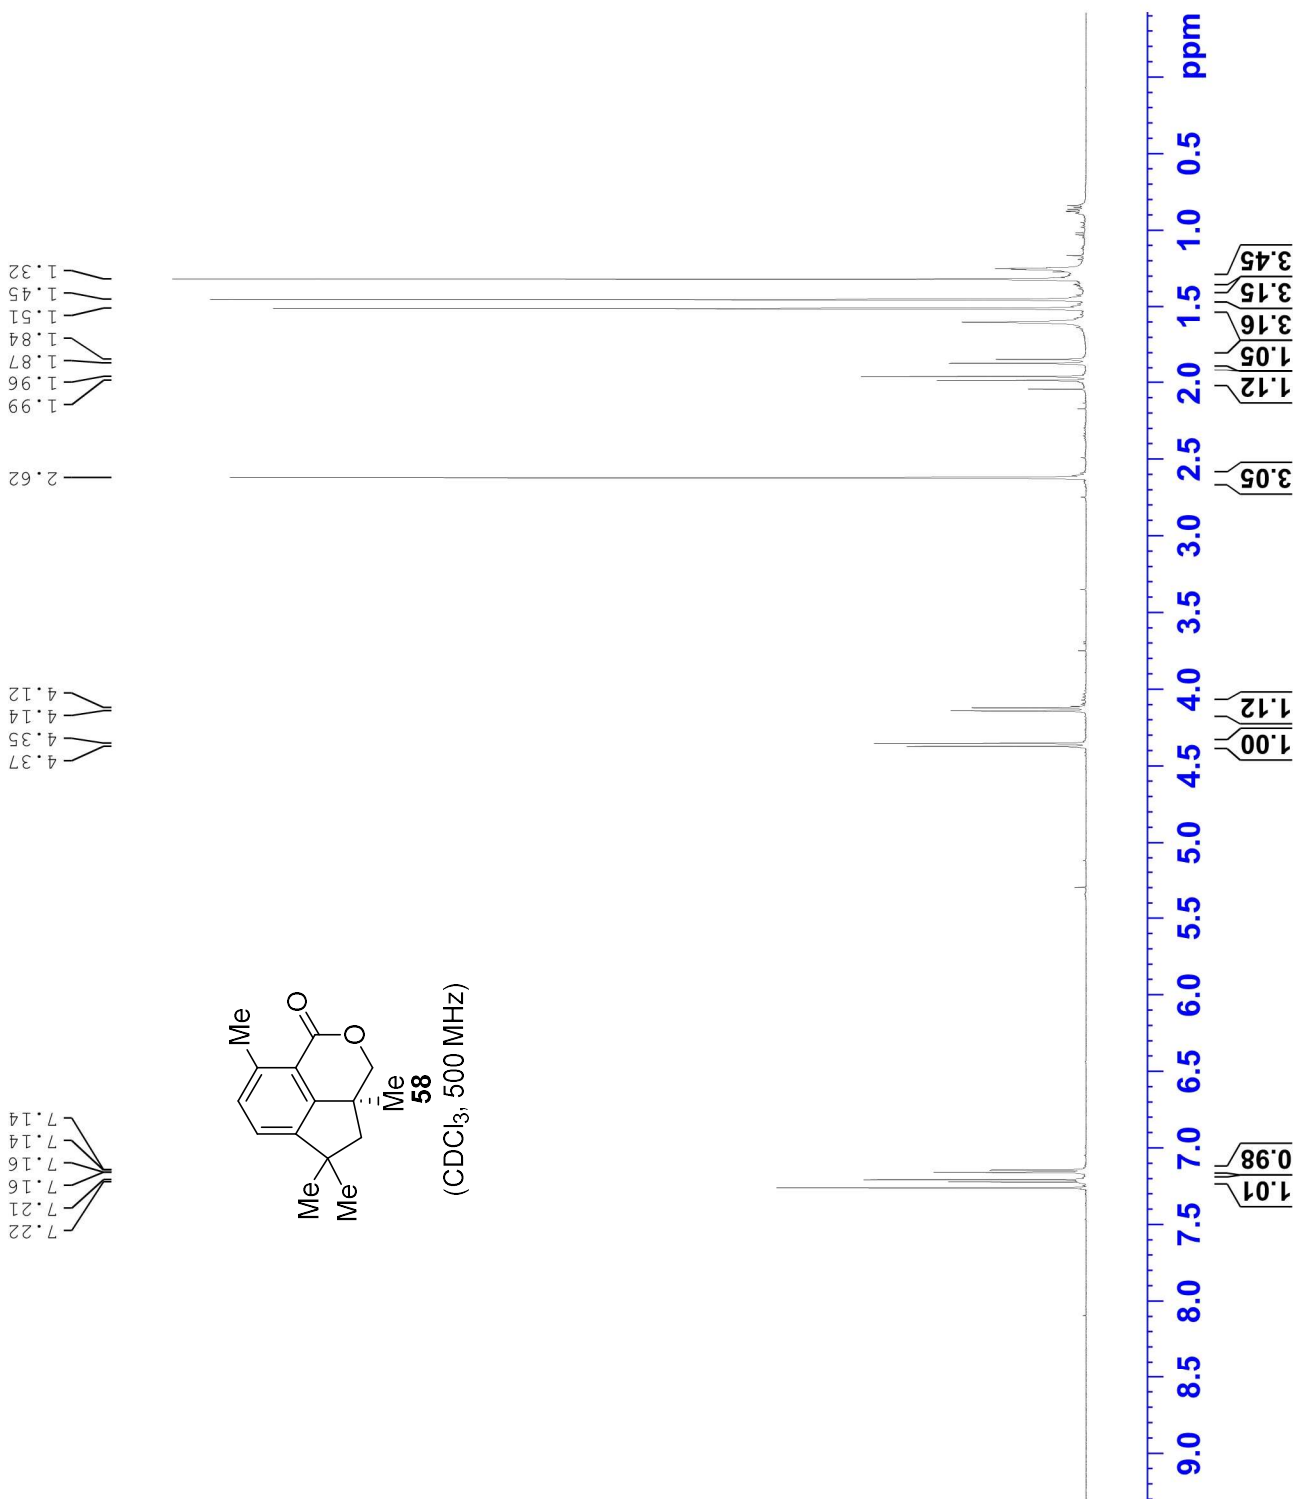

Current Data Parameters  
 NAME Yh-5-47-a  
 EXPNO 2  
 PROCNO 2

F2 - Acquisition Parameters

Date\_ 20180805  
 Time\_ 20.54  
 INSTRUM spect  
 PROBHD 5 mm PABBO BB/  
 PULPROG zgdc  
 TD 187496  
 SOLVENT CDC13  
 NS 872  
 DS 0  
 SWH 31250.000 Hz  
 FIDRES 0.166670 Hz  
 AQ 2.9999361 sec  
 RG 2050  
 DW 16.000 usec  
 DE 6.50 usec  
 TE 297.9 K  
 D1 3.00000000 sec  
 D11 0.03000000 sec  
 TD0 1

==== CHANNEL f1 =====  
 SFO1 125.7049802 MHz  
 NUC1 13C  
 P1 10.00 usec  
 PLW1 72.83999634 W

==== CHANNEL f2 =====  
 SFO2 499.8724993 MHz  
 NUC2 1H  
 CPDPRG[2] waltz16  
 PCPD2 80.00 usec  
 PLW2 19.00000000 W  
 PLW12 0.29688001 W

F2 - Processing parameters  
 SI 1048576  
 SF 125.6924115 MHz  
 WDW EM  
 SSB 0  
 LB 0.30 Hz  
 GB 0  
 PC 1.40

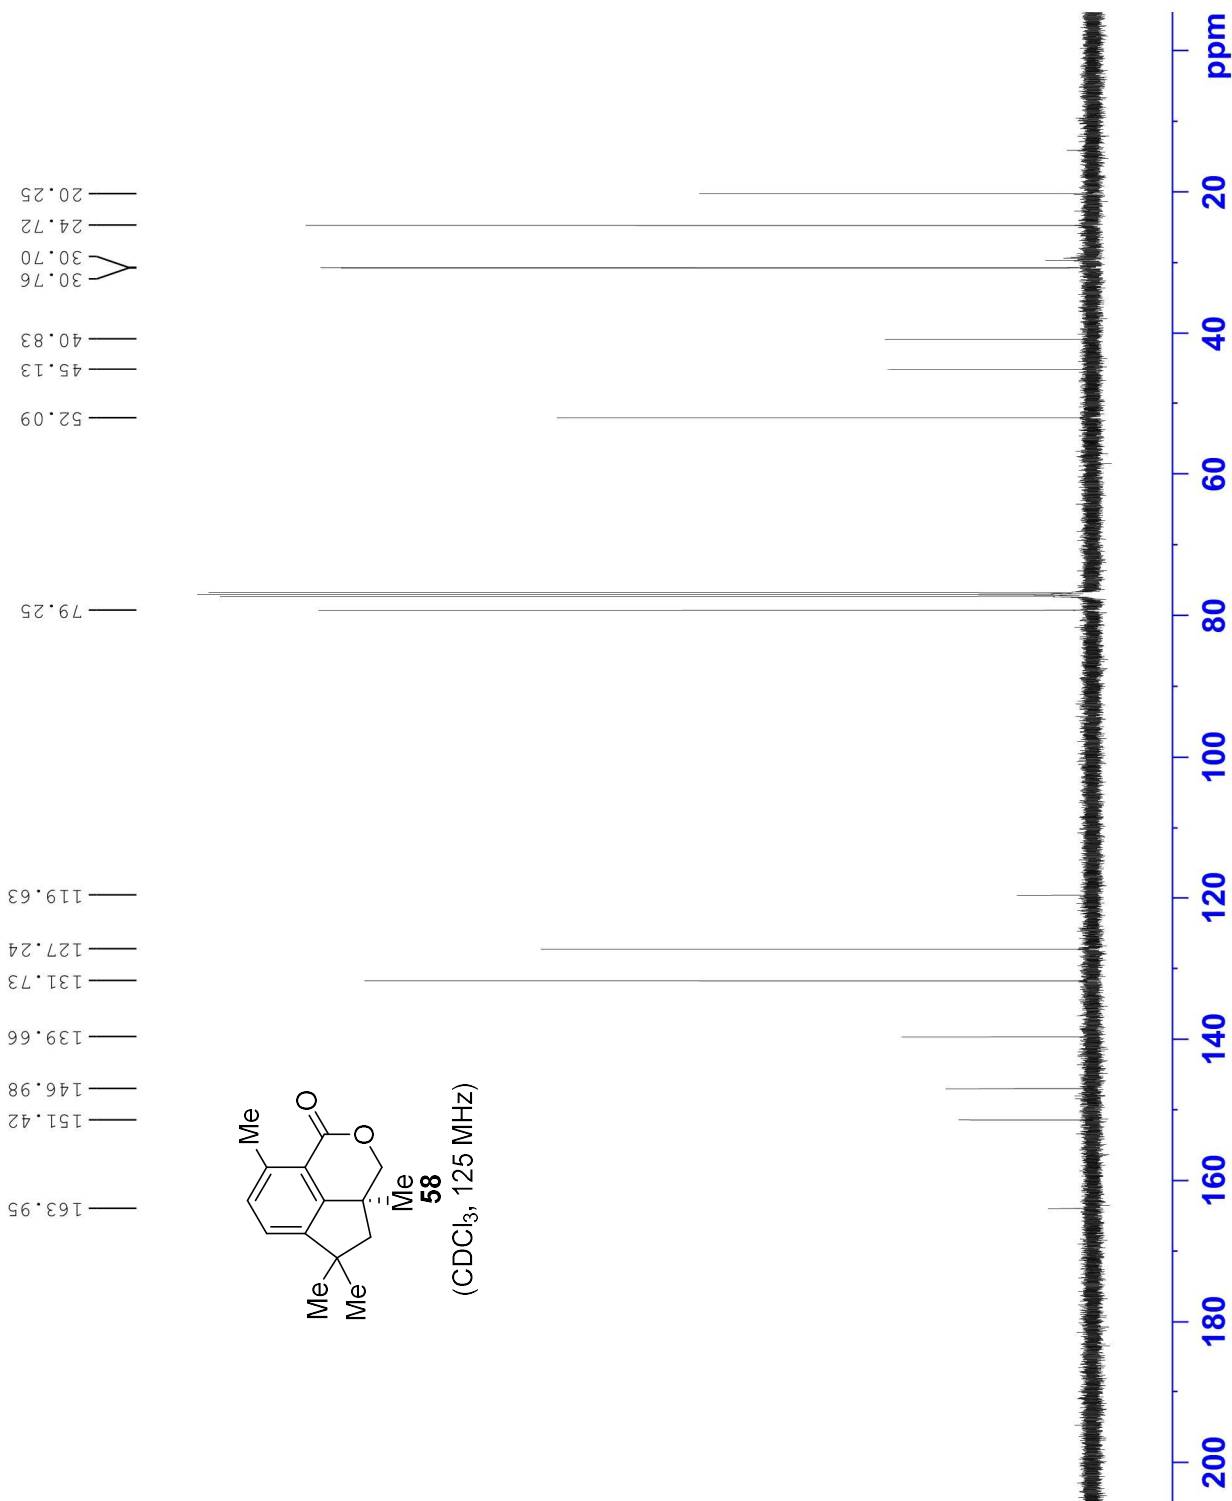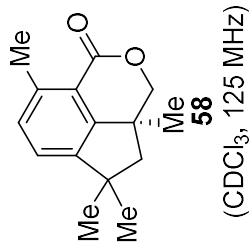

Current Data Parameters  
 NAME yh-4-107  
 EXPNO 1  
 PROCNO 1

F2 - Acquisition Parameters

Date 20180525  
 Time 21.45  
 INSTRUM spect  
 PROBHD 5 mm PABBO BB/  
 PULPROG zg  
 TD 59998  
 SOLVENT CDC13  
 NS 7  
 DS 0  
 SWH 10000.000 Hz  
 FIDRES 0.166672 Hz  
 AQ 2.9999001 sec  
 RG 77.07  
 DW 50.000 usec  
 DE 6.50 usec  
 TE 296.3 K  
 D1 4.0000000 sec  
 TD0 1

==== CHANNEL f1 =====  
 SFO1 499.8730869 MHz  
 NUC1 1H  
 P1 3.58 usec  
 PLW1 18.25000000 W

F2 - Processing parameters  
 SI 65536  
 SF 499.8700122 MHz  
 EM  
 WDW 0  
 SSB 0  
 LB 0.30 Hz  
 GB 0  
 PC 1.00

3.75  
3.74  
3.74  
3.44  
3.43  
3.42  
3.21  
3.20  
3.19  
2.55  
2.54  
2.52  
2.51  
2.51  
2.50  
2.49  
2.14  
2.13  
2.13  
2.12  
2.11  
2.10  
2.10  
1.92  
1.92  
1.91  
1.91  
1.90  
1.89  
1.89  
1.88  
1.72  
1.71  
1.70  
1.70  
1.69  
1.61  
1.58  
1.41  
1.38  
1.22

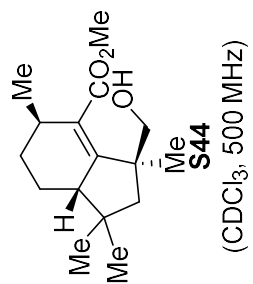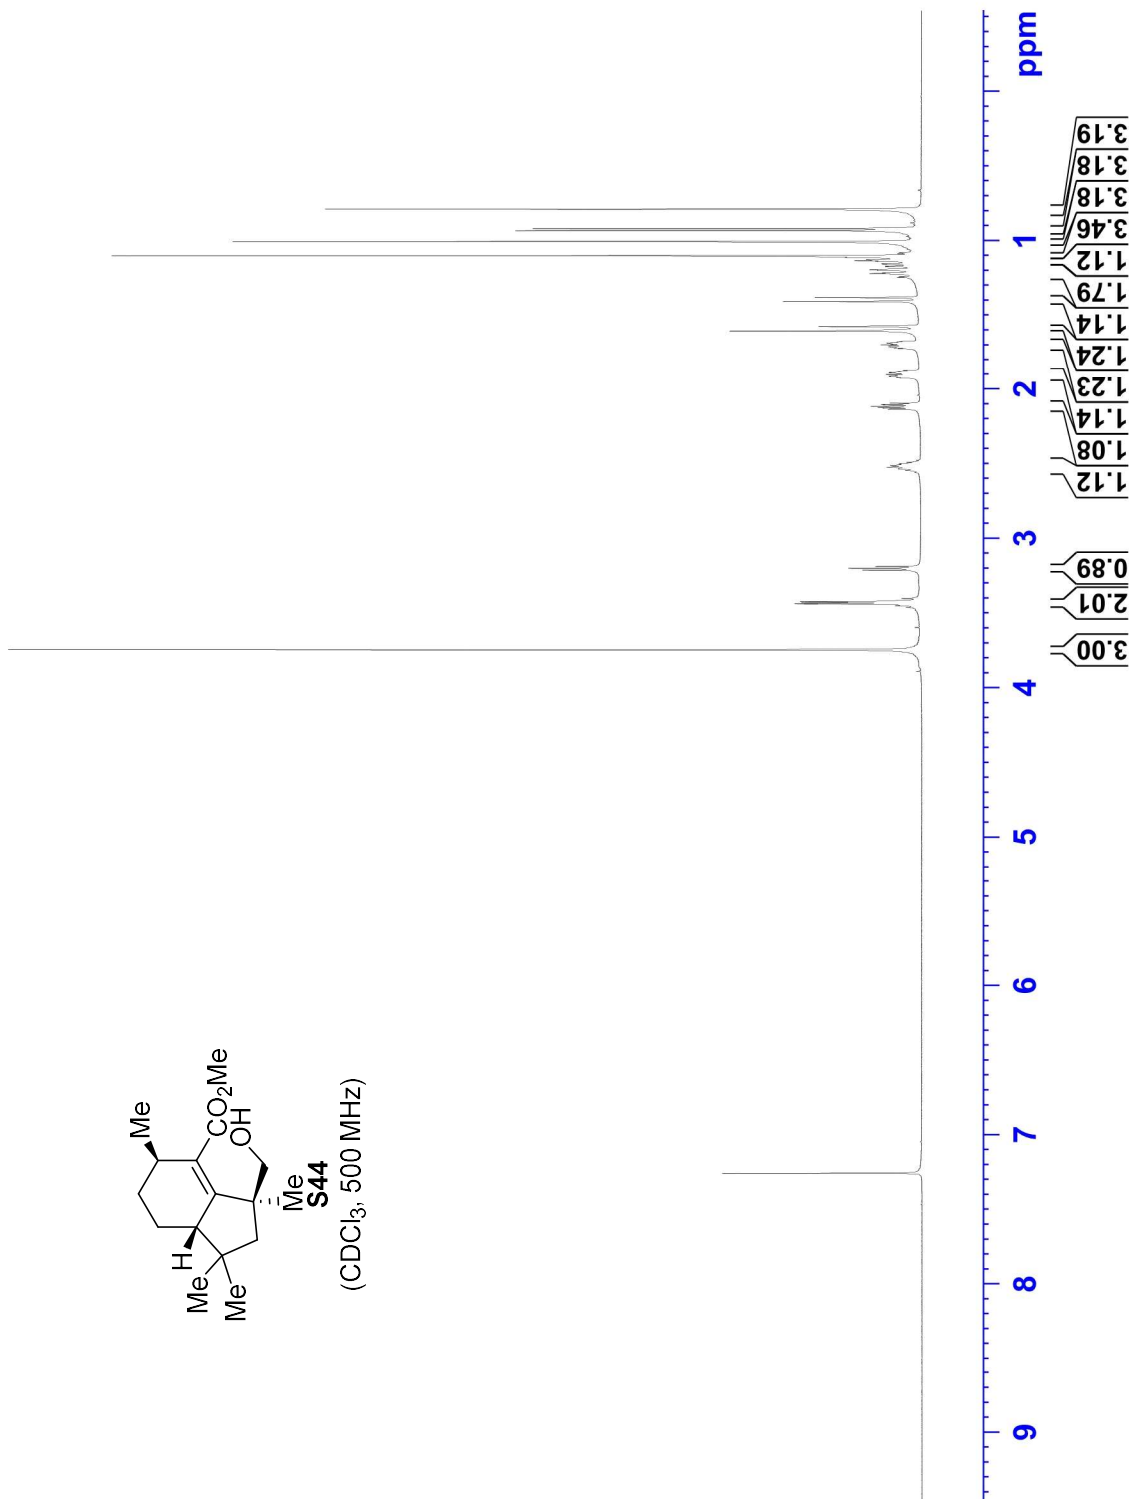

172.22 —  
 151.17 —  
 131.15 —  
 71.68 —  
 54.10 —  
 52.98 —  
 51.61 —  
 46.56 —  
 38.46 —  
 33.15 —  
 31.37 —  
 27.80 —  
 23.87 —  
 22.41 —  
 22.07 —  
 20.21 —

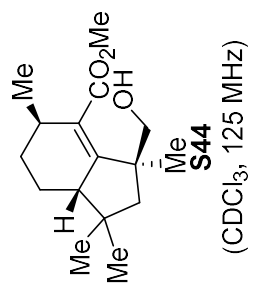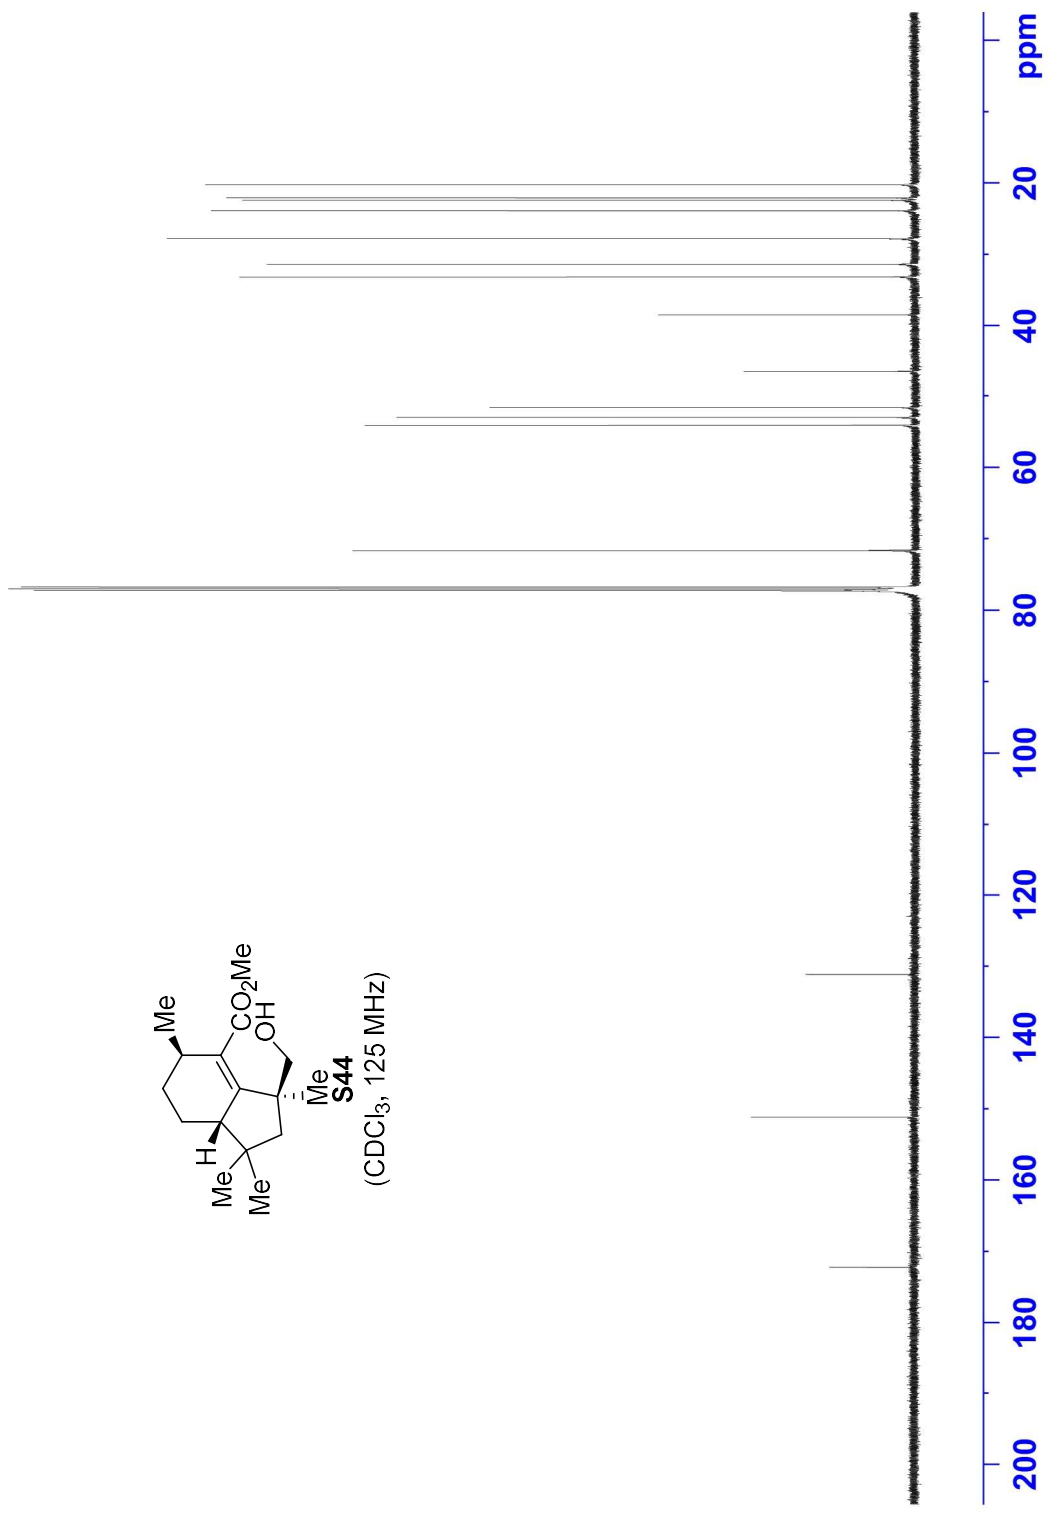

Current Data Parameters  
 NAME yh-4-107  
 EXPNO 2  
 PROCNO 2

F2 - Acquisition Parameters  
 Date\_ 20180526  
 Time\_ 8.04  
 INSTRUM spect  
 PROBHD 5 mm PABBO BB/  
 PULPROG zgdc  
 TD 187496  
 SOLVENT CDCl3  
 NS 6000  
 DS 0  
 SWH 31250.000 Hz  
 FIDRES 0.166670 Hz  
 AQ 2.9999361 sec  
 RG 2050  
 DW 16.000 usec  
 DE 6.50 usec  
 TE 297.7 K  
 D1 3.0000000 sec  
 D11 0.0300000 sec  
 TD0 1

==== CHANNEL f1 =====  
 SFO1 125.7049802 MHz  
 NUC1 13C  
 P1 10.00 usec  
 PLW1 72.83999634 W

==== CHANNEL f2 =====  
 SFO2 499.8724993 MHz  
 NUC2 1H  
 CPDPRG[2] waltz16  
 PCPD2 80.00 usec  
 PLW2 19.00000000 W  
 PLW12 0.29688001 W

F2 - Processing parameters  
 SI 1048576  
 SF 125.6924115 MHz  
 WDW EM  
 SSB 0  
 LB 0.30 Hz  
 GB 0  
 PC 1.40

Current Data Parameters  
 NAME yh-4-92  
 EXPNO 1  
 PROCNO 1

F2 - Acquisition Parameters

Date\_ 20180525  
 Time\_ 21.06  
 INSTRUM spect  
 PROBHD 5 mm PABBO BB/  
 PULPROG zg  
 TD 59998  
 SOLVENT CDC13  
 NS 4  
 DS 0  
 SWH 10000.000 Hz  
 FIDRES 0.166672 Hz  
 AQ 2.9999001 sec  
 RG 56.75  
 DW 50.000 usec  
 DE 6.50 usec  
 TE 295.6 K  
 D1 4.0000000 sec  
 TD0 1

==== CHANNEL f1 =====  
 SFO1 499.8730869 MHz  
 NUC1 1H  
 P1 3.58 usec  
 PLW1 18.25000000 W

F2 - Processing parameters  
 SI 65536  
 SF 499.8700123 MHz  
 EM  
 WDW 0  
 SSB 0  
 LB 0.30 Hz  
 GB 0  
 PC 1.00

3.81  
3.79  
3.70  
3.39  
3.38  
2.51  
2.50  
2.17  
2.16  
2.15  
2.05  
2.03  
1.90  
1.88  
1.88  
1.88  
1.87  
1.86  
1.86  
1.86  
1.66  
1.66  
1.65  
1.65  
1.64  
1.63  
1.24  
1.22  
1.17  
1.17  
1.15  
1.15  
1.13  
1.11  
1.11  
1.10  
1.09  
1.08  
1.00  
0.99

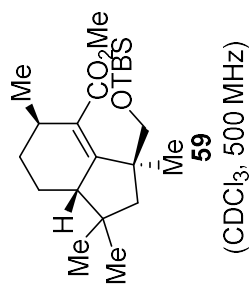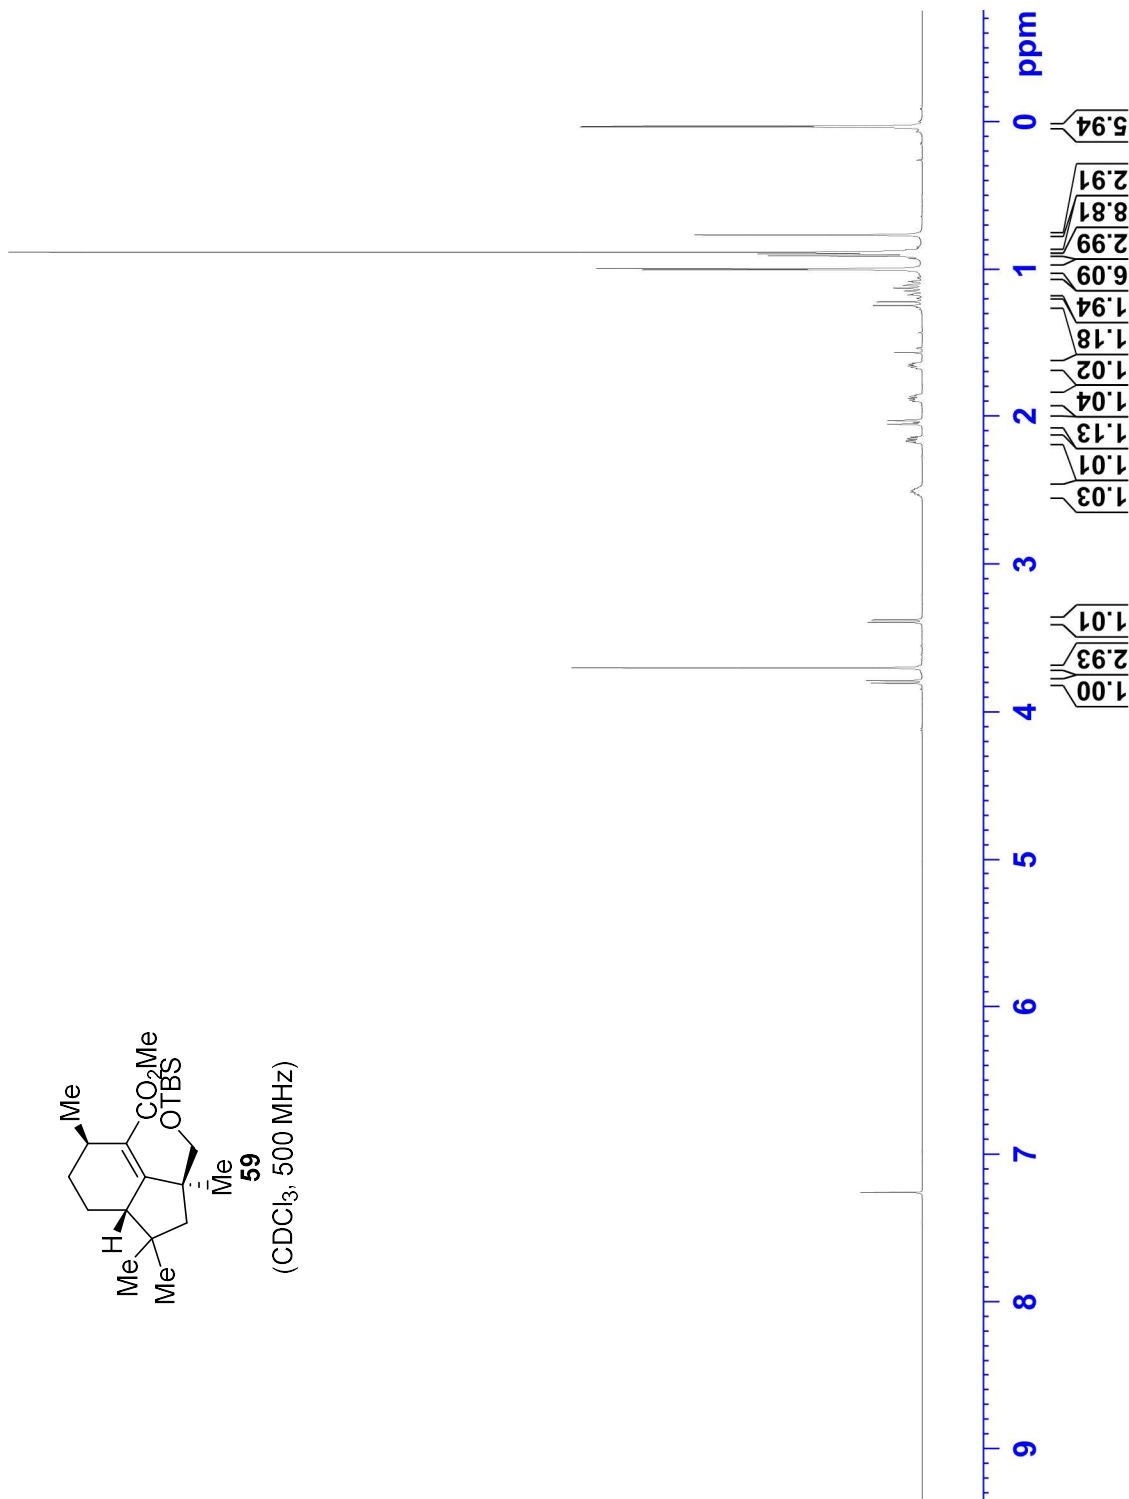

Current Data Parameters  
 NAME Yh-4-92  
 EXPNO 2  
 PROCNO 2

F2 - Acquisition Parameters  
 Date\_ 20180525  
 Time\_ 21.38  
 INSTRUM spect  
 PROBHD 5 mm PABBO BB/  
 PULPROG zgdc  
 TD 187496  
 SOLVENT CDC13  
 NS 245  
 DS 0  
 SWH 31250.000 Hz  
 FIDRES 0.166670 Hz  
 AQ 2.9999361 sec  
 RG 2050  
 DW 16.000 usec  
 DE 6.50 usec  
 TE 297.2 K  
 D1 3.0000000 sec  
 D11 0.0300000 sec  
 TD0 1

==== CHANNEL f1 =====  
 SFO1 125.7049802 MHz  
 NUC1 13C  
 P1 10.00 usec  
 PLW1 72.83999634 W

==== CHANNEL f2 =====  
 SFO2 499.8724993 MHz  
 NUC2 1H  
 CPDPRG[2] waltz16  
 PCPD2 80.00 usec  
 PLW2 19.00000000 W  
 PLW12 0.29688001 W

F2 - Processing parameters  
 SI 1048576  
 SF 125.6924115 MHz  
 WDW EM  
 SSB 0  
 LB 0.30 Hz  
 GB 0  
 PC 1.40

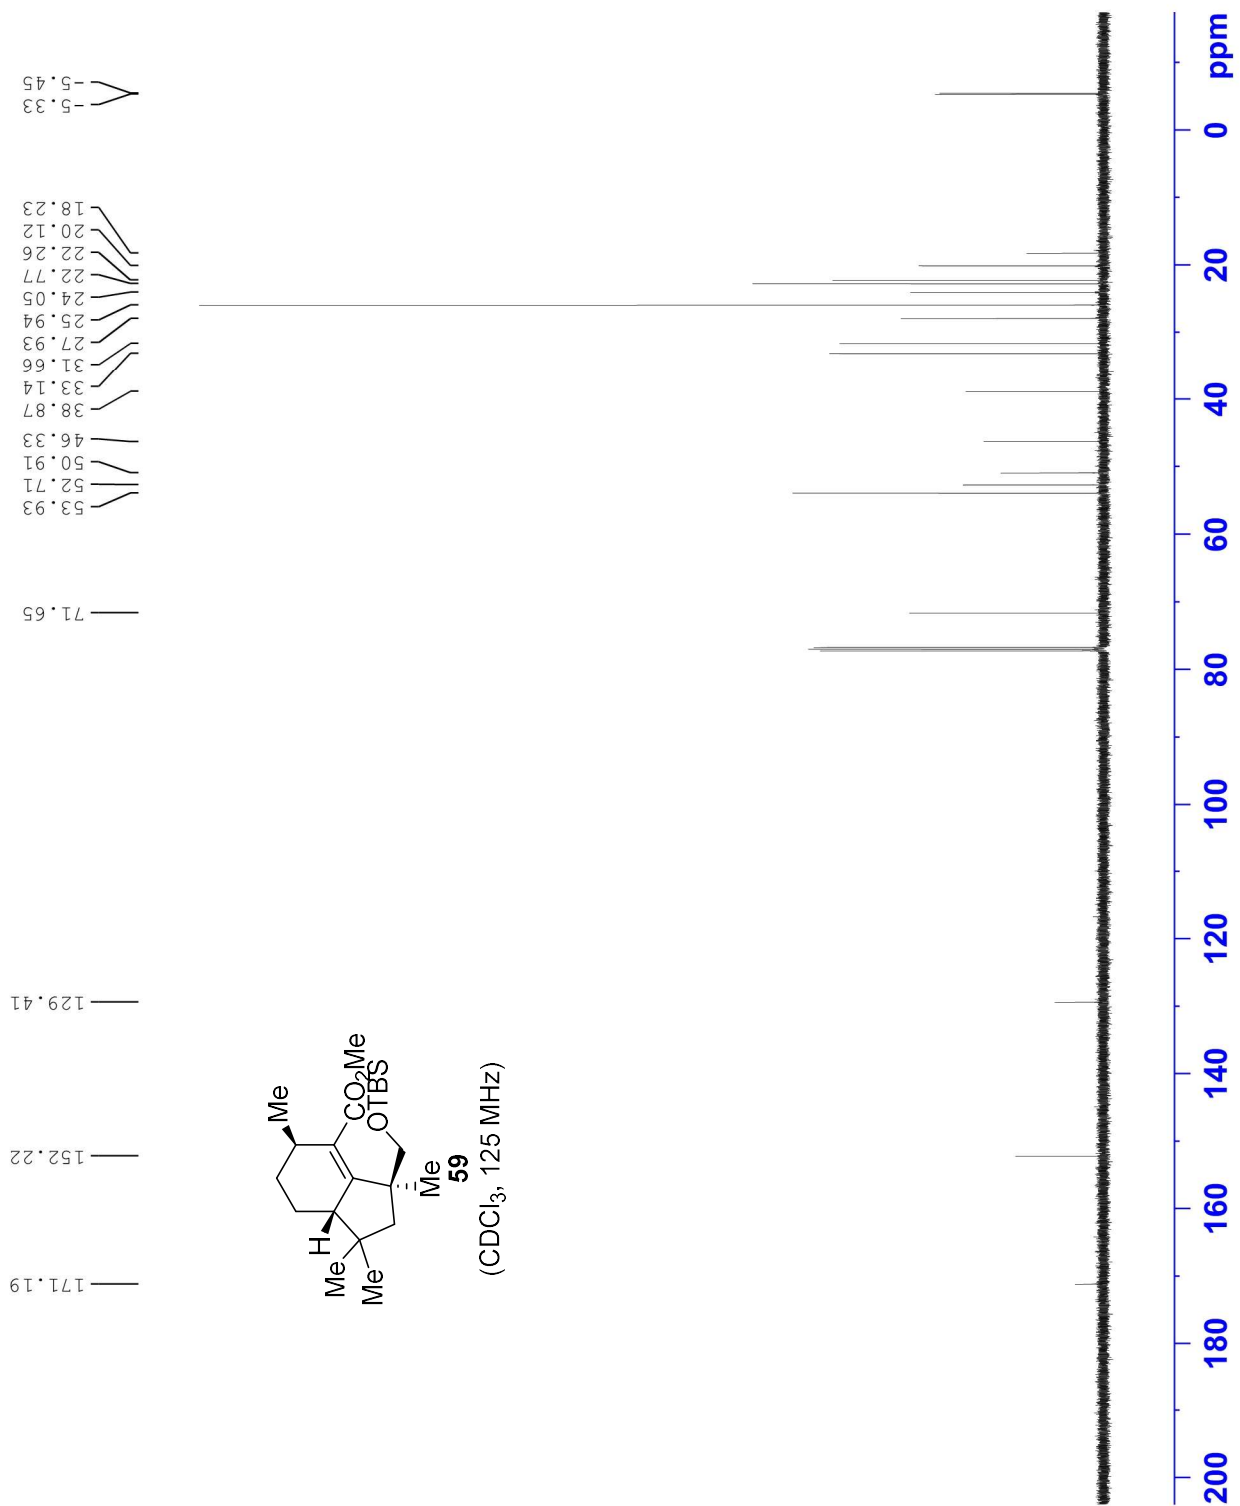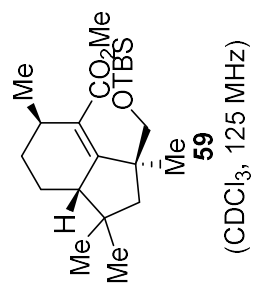





Current Data Parameters  
 NAME Yh-4-112  
 EXPNO 2  
 PROCNO 2

F2 - Acquisition Parameters  
 Date\_ 20180527  
 Time\_ 7.01  
 INSTRUM spect  
 PROBHD 5 mm PABBO BB/  
 PULPROG zgdc  
 TD 187496  
 SOLVENT CDCl3  
 NS 4661  
 DS 0  
 SWH 31250.000 Hz  
 FIDRES 0.166670 Hz  
 AQ 2.9999361 sec  
 RG 2050  
 DW 16.000 usec  
 DE 6.50 usec  
 TE 297.6 K  
 D1 3.0000000 sec  
 D11 0.0300000 sec  
 TD0 1

==== CHANNEL f1 =====  
 SFO1 125.7049802 MHz  
 NUC1 13C  
 P1 10.00 usec  
 PLW1 72.83999634 W

==== CHANNEL f2 =====  
 SFO2 499.8724993 MHz  
 NUC2 1H  
 CPDPRG[2] waltz16  
 PCPD2 80.00 usec  
 PLW2 19.00000000 W  
 PLW12 0.29688001 W

F2 - Processing parameters  
 SI 1048576  
 SF 125.6924115 MHz  
 WDW EM  
 SSB 0  
 LB 0.30 Hz  
 GB 0  
 PC 1.40

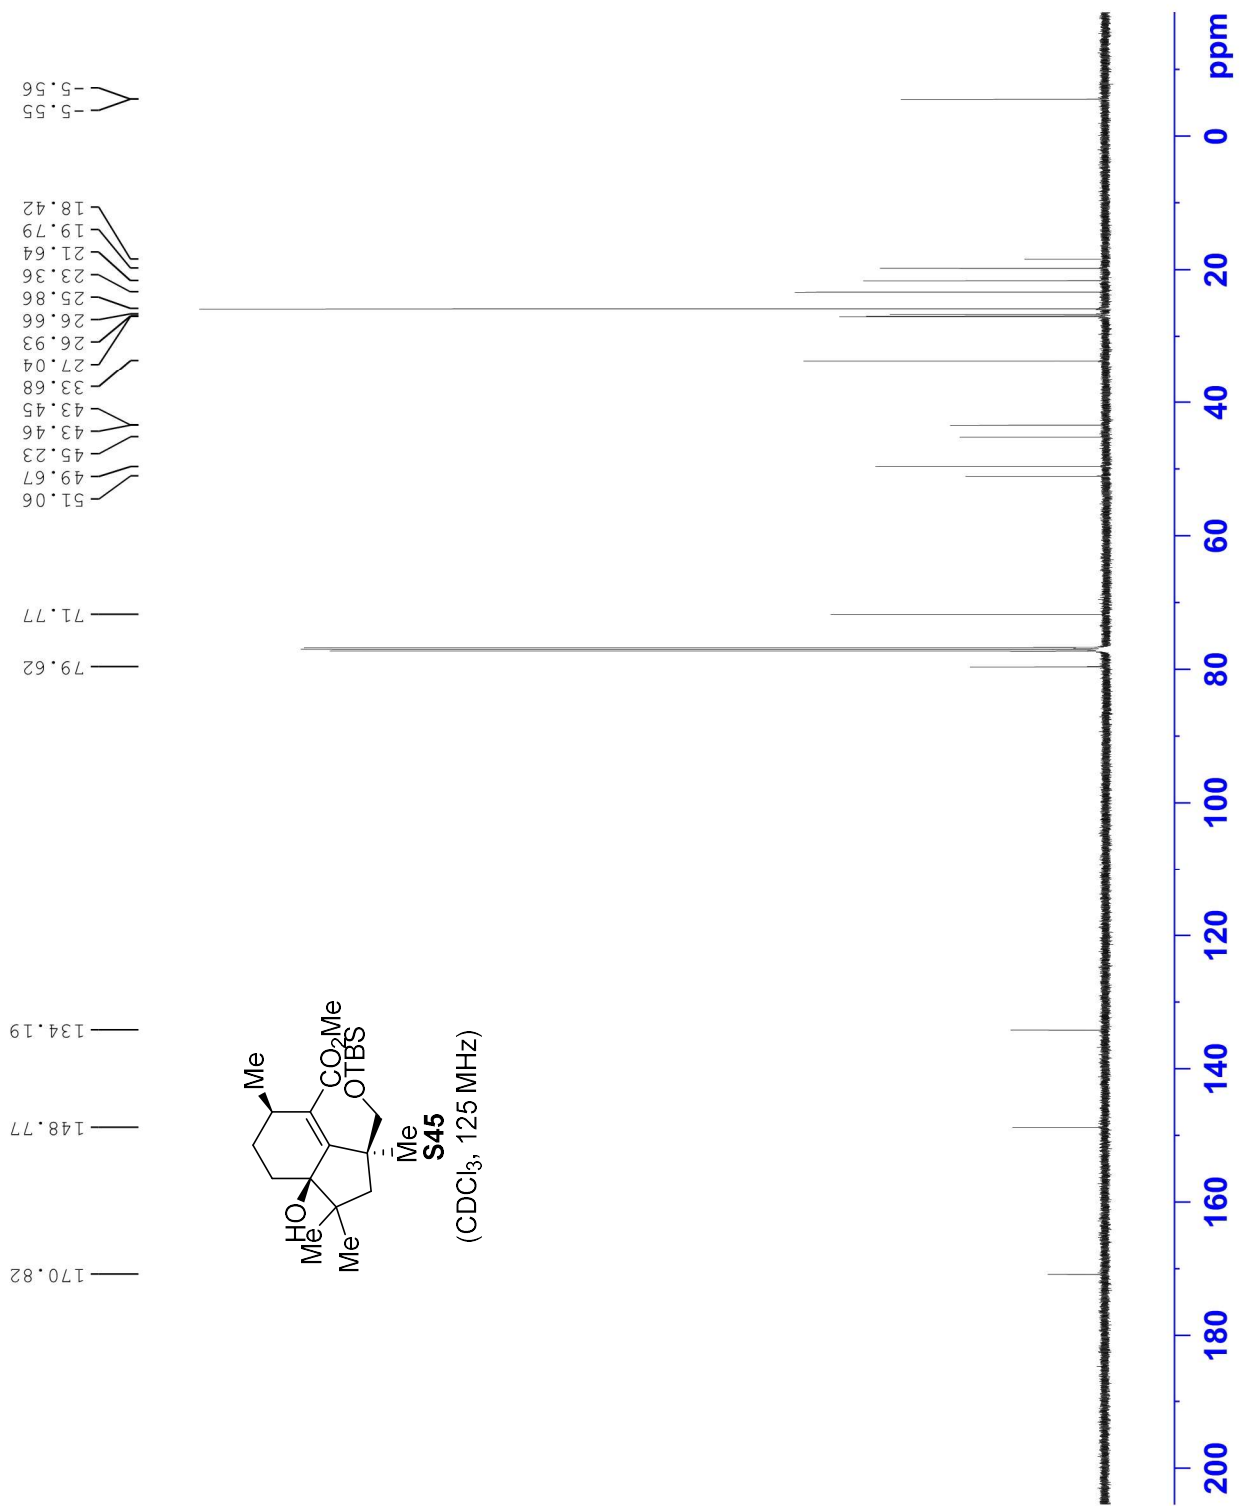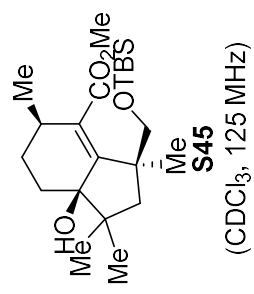

Current Data Parameters  
 NAME yh-4-114  
 EXPNO 1  
 PROCNO 1

F2 - Acquisition Parameters  
 Date\_ 20180529  
 Time\_ 23.38  
 INSTRUM spect  
 PROBHD 5 mm PABBO BB/  
 PULPROG zg  
 TD 59998  
 SOLVENT CDC13  
 NS 2  
 DS 0  
 SWH 10000.000 Hz  
 FIDRES 0.166672 Hz  
 AQ 2.9999001 sec  
 RG 105.66  
 DW 50.000 usec  
 DE 6.50 usec  
 TE 296.1 K  
 D1 4.0000000 sec  
 TD0 1

==== CHANNEL f1 =====  
 SFO1 499.8730869 MHz  
 NUC1 1H  
 P1 3.58 usec  
 PLW1 18.25000000 W

F2 - Processing parameters  
 SI 65536  
 SF 499.8700000 MHz  
 EM  
 WDW 0  
 SSB 0  
 LB 0.30 Hz  
 GB 0  
 PC 1.00

3.79  
3.77  
3.74  
3.59  
3.57  
2.67  
2.66  
2.65  
2.64  
2.64  
2.63  
2.42  
2.41  
2.41  
2.40  
2.39  
2.38  
2.37  
2.36  
2.21  
2.19  
2.07  
2.06  
2.05  
2.04  
2.02  
2.02  
2.01  
2.00  
1.57  
1.41  
1.39  
1.17  
1.11  
1.05  
1.03  
0.89  
0.84

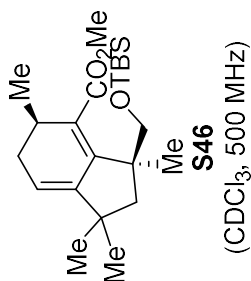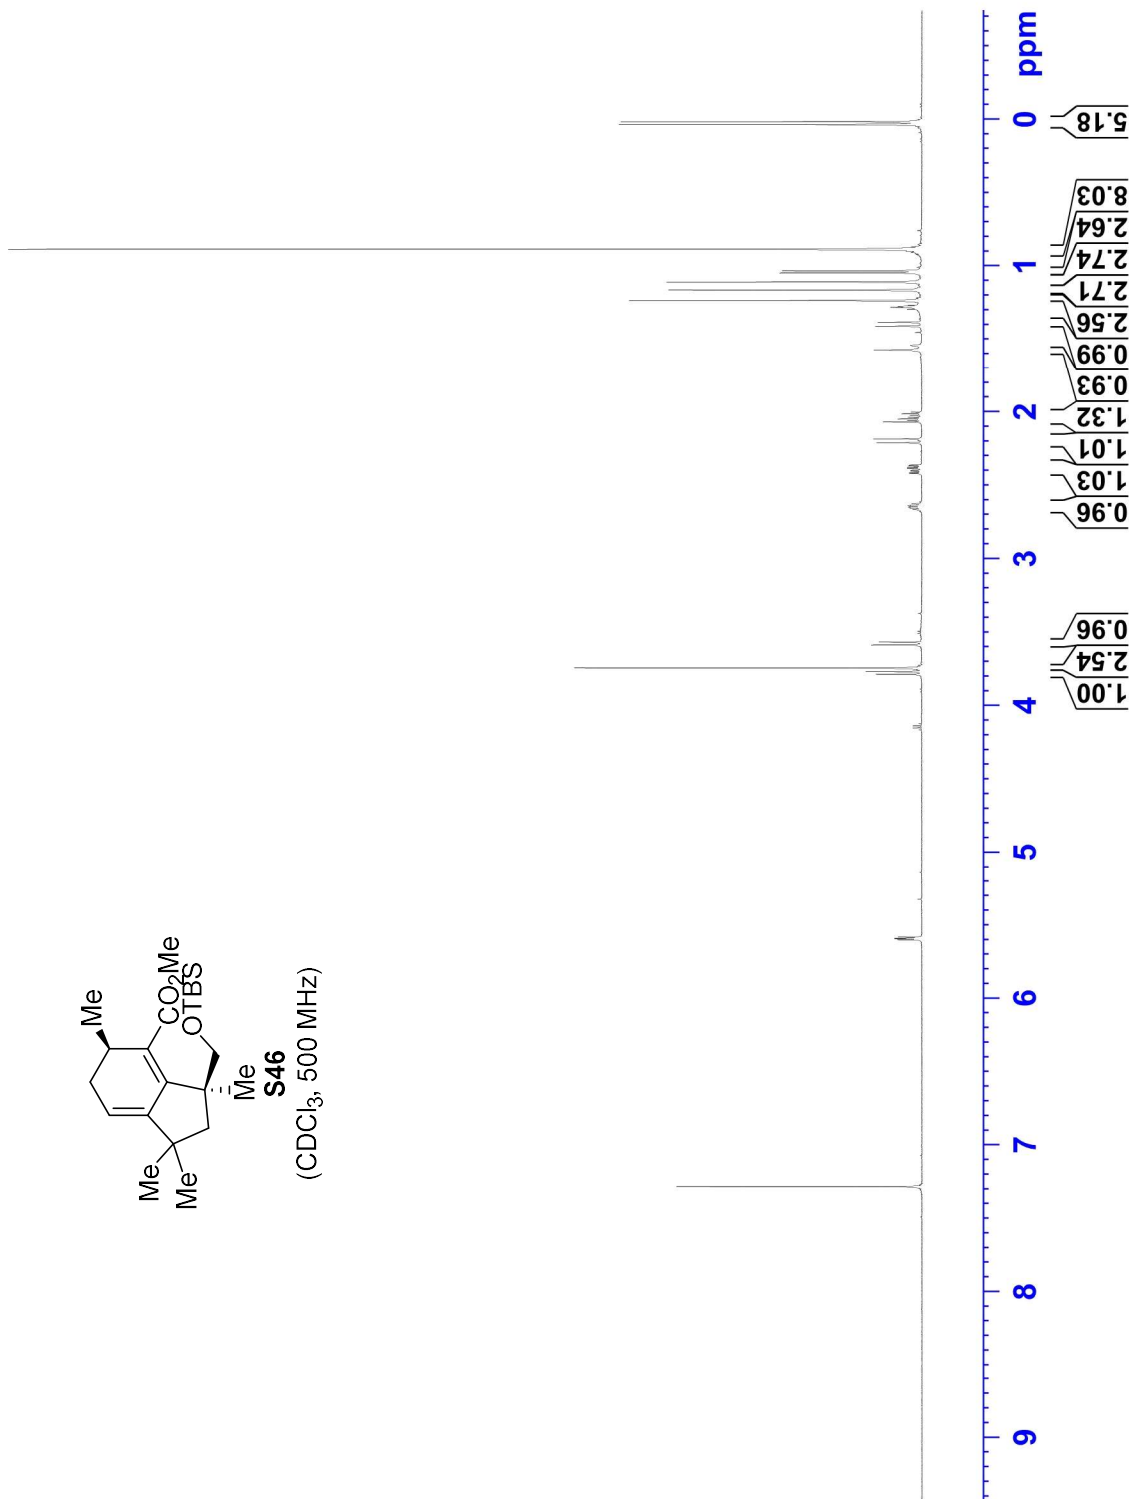

Current Data Parameters  
 NAME yh-4-114  
 EXPNO 2  
 PROCNO 2

F2 - Acquisition Parameters  
 Date\_ 20180530  
 Time\_ 8.10  
 INSTRUM spect  
 PROBHD 5 mm PABBO BB/  
 PULPROG zgdc  
 TD 187496  
 SOLVENT CDC13  
 NS 5000  
 DS 0  
 SWH 31250.000 Hz  
 FIDRES 0.166670 Hz  
 AQ 2.9999361 sec  
 RG 2050  
 DW 16.000 usec  
 DE 6.50 usec  
 TE 297.7 K  
 D1 3.0000000 sec  
 D11 0.0300000 sec  
 TD0 1

==== CHANNEL f1 =====  
 SFO1 125.7049802 MHz  
 NUC1 13C  
 P1 10.00 usec  
 PLW1 72.83999634 W

==== CHANNEL f2 =====  
 SFO2 499.8724993 MHz  
 NUC2 1H  
 CPDPRG[2] waltz16  
 PCPD2 80.00 usec  
 PLW2 19.00000000 W  
 PLW12 0.29688001 W

F2 - Processing parameters  
 SI 1048576  
 SF 125.6924115 MHz  
 WDW EM  
 SSB 0  
 LB 0.30 Hz  
 GB 0  
 PC 1.40

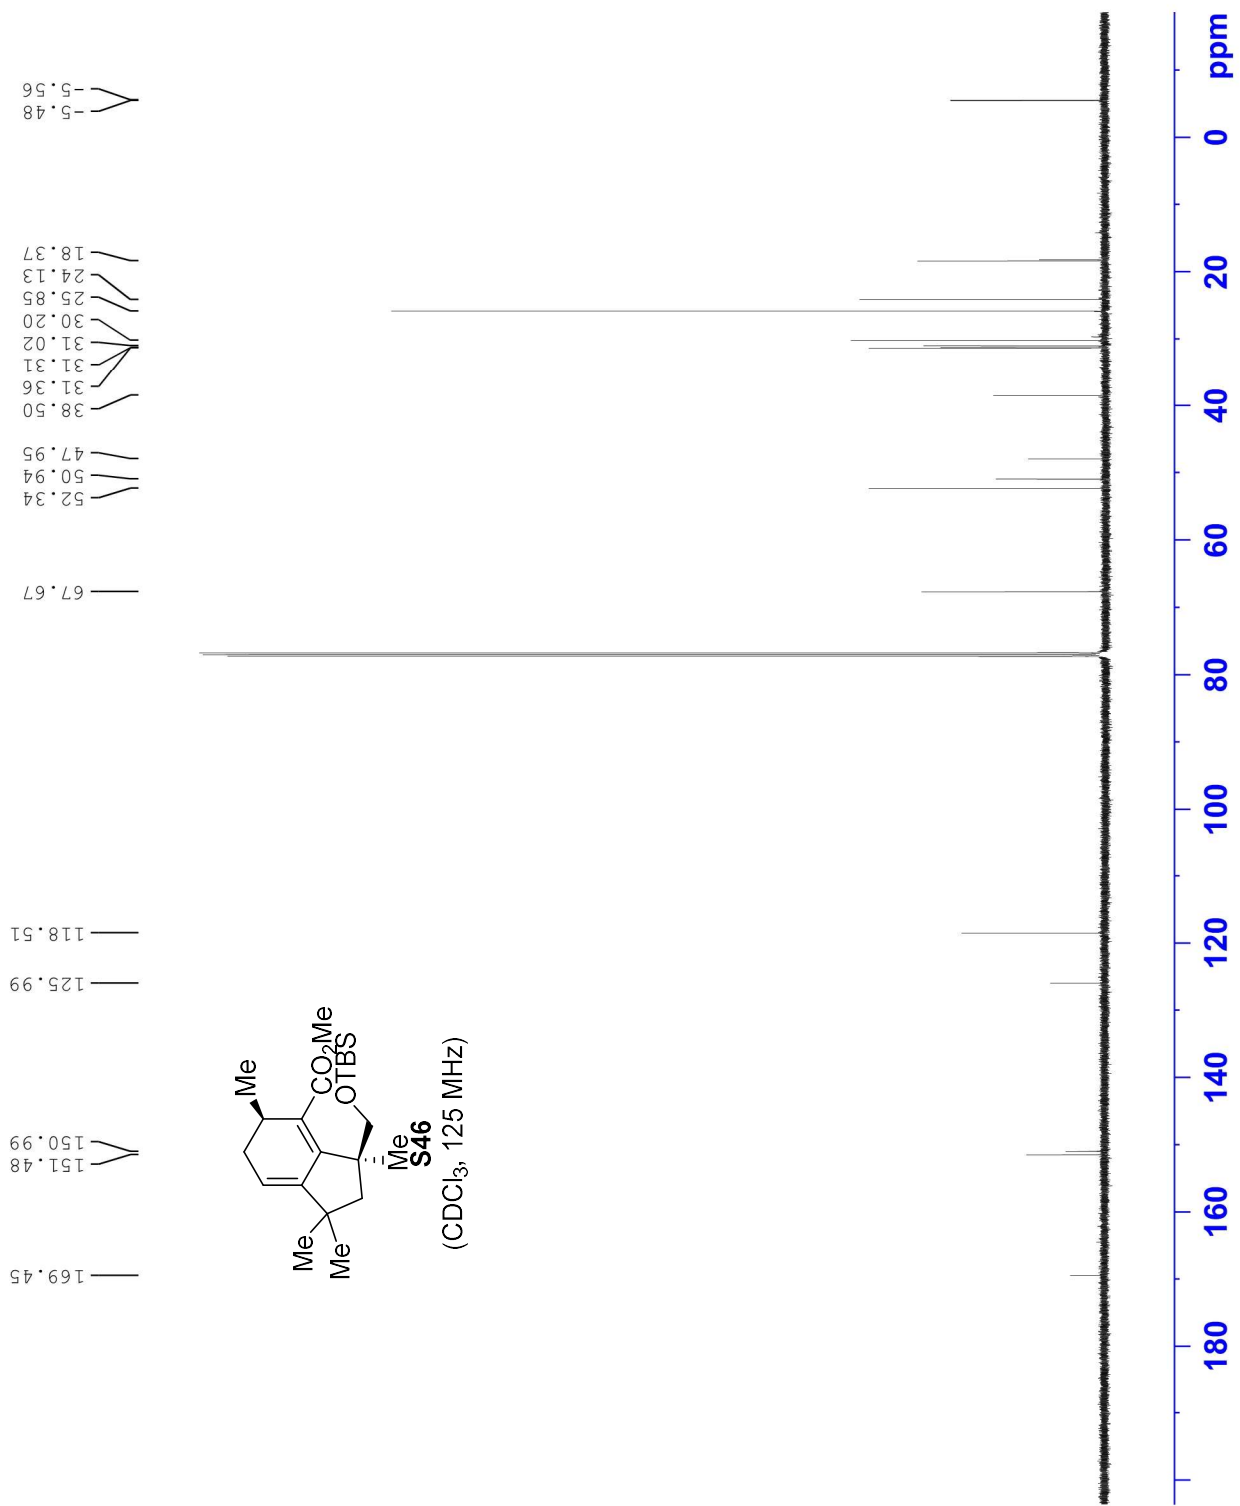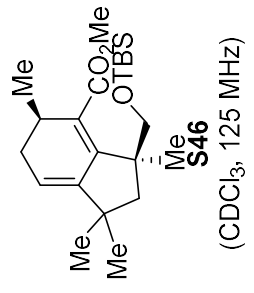

Current Data Parameters  
 NAME yh-4-116  
 EXPNO 1  
 PROCNO 1

F2 - Acquisition Parameters

Date\_ 20180528  
 Time\_ 15.46  
 INSTRUM spect  
 PROBHD 5 mm PATXI 1H/  
 PULPROG zg  
 TD 59998  
 SOLVENT CDC13  
 NS 8  
 DS 0  
 SWH 10000.000 Hz  
 FIDRES 0.166672 Hz  
 AQ 2.9999001 sec  
 RG 196.79  
 DW 50.000 usec  
 DE 10.000 usec  
 TE 293.8 K  
 D1 3.0000000 sec  
 TD0 1

==== CHANNEL f1 =====  
 SFO1 500.1330885 MHz  
 NUC1 1H  
 P1 2.67 usec  
 PLW1 12.19999981 W

F2 - Processing parameters  
 SI 65536  
 SF 500.1300137 MHz  
 EM  
 WDW 0  
 SSB 0  
 LB 0.30 Hz  
 GB 0  
 PC 1.00

5.37  
 5.36  
 5.36  
 5.36  
 5.35  
 4.34  
 4.31  
 4.21  
 4.19  
 3.66  
 3.63  
 3.53  
 3.53  
 3.51  
 2.39  
 2.38  
 2.35  
 2.35  
 2.35  
 2.34  
 2.33  
 2.33  
 2.32  
 2.03  
 2.02  
 2.01  
 1.99  
 1.98  
 1.97  
 1.95  
 1.93  
 1.46  
 1.44  
 1.24  
 1.14  
 1.09  
 1.07  
 1.05

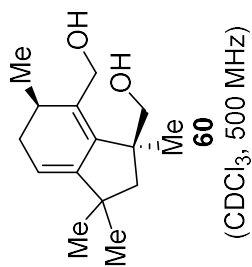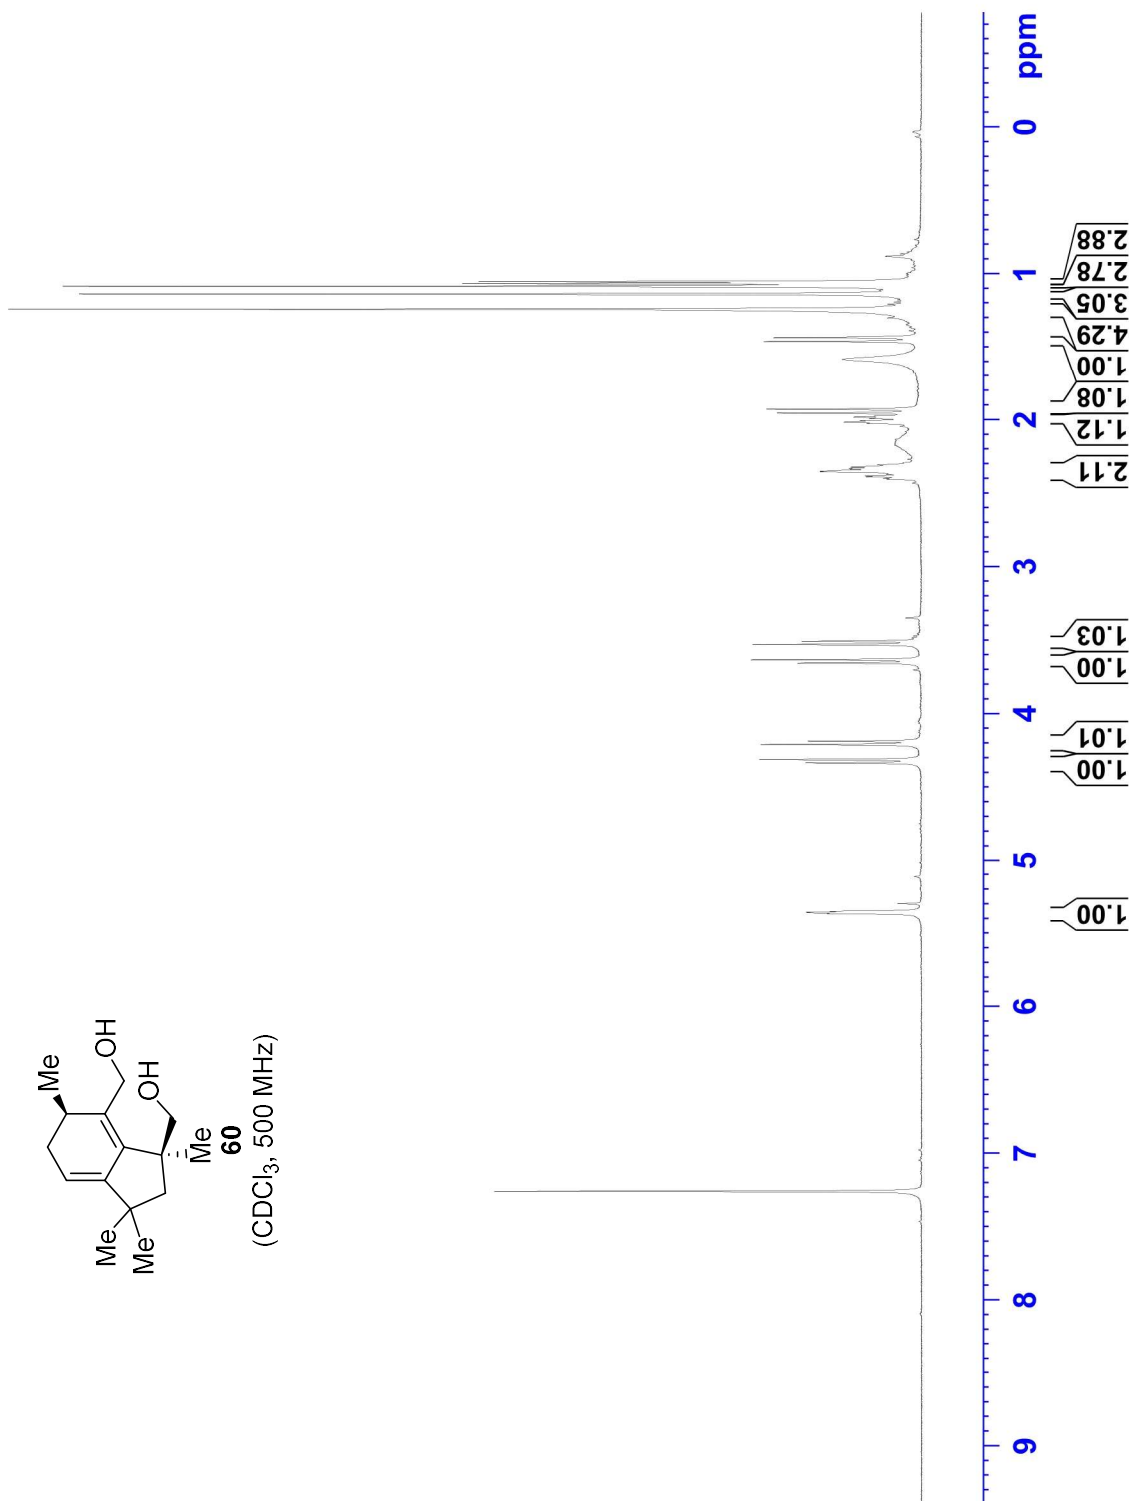

Current Data Parameters  
 NAME Yh-4-116  
 EXPNO 2  
 PROCNO 2

F2 - Acquisition Parameters  
 Date\_ 20180529  
 Time\_ 5.53  
 INSTRUM spect  
 PROBHD 5 mm PABBO BB/  
 PULPROG zgdc  
 TD 187496  
 SOLVENT CDC13  
 NS 5000  
 DS 0  
 SWH 31250.000 Hz  
 FIDRES 0.166670 Hz  
 AQ 2.9999361 sec  
 RG 2050  
 DW 16.000 usec  
 DE 6.50 usec  
 TE 297.7 K  
 D1 3.0000000 sec  
 D11 0.0300000 sec  
 TD0 1

==== CHANNEL f1 =====  
 SFO1 125.7049802 MHz  
 NUC1 13C  
 P1 10.00 usec  
 PLW1 72.83999634 W

==== CHANNEL f2 =====  
 SFO2 499.8724993 MHz  
 NUC2 1H  
 CPDPRG[2] waltz16  
 PCPD2 80.00 usec  
 PLW2 19.00000000 W  
 PLW12 0.29688001 W

F2 - Processing parameters  
 SI 1048576  
 SF 125.6924115 MHz  
 WDW EM  
 SSB 0  
 LB 0.30 Hz  
 GB 0  
 PC 1.40

18.81  
 25.78  
 30.73  
 31.03  
 31.70  
 32.55  
 38.73  
 47.00  
 53.13  
 61.91  
 70.37  
 114.09  
 134.19  
 141.14  
 150.33

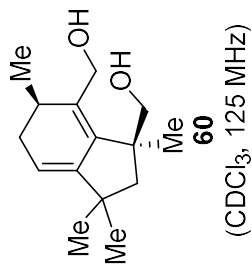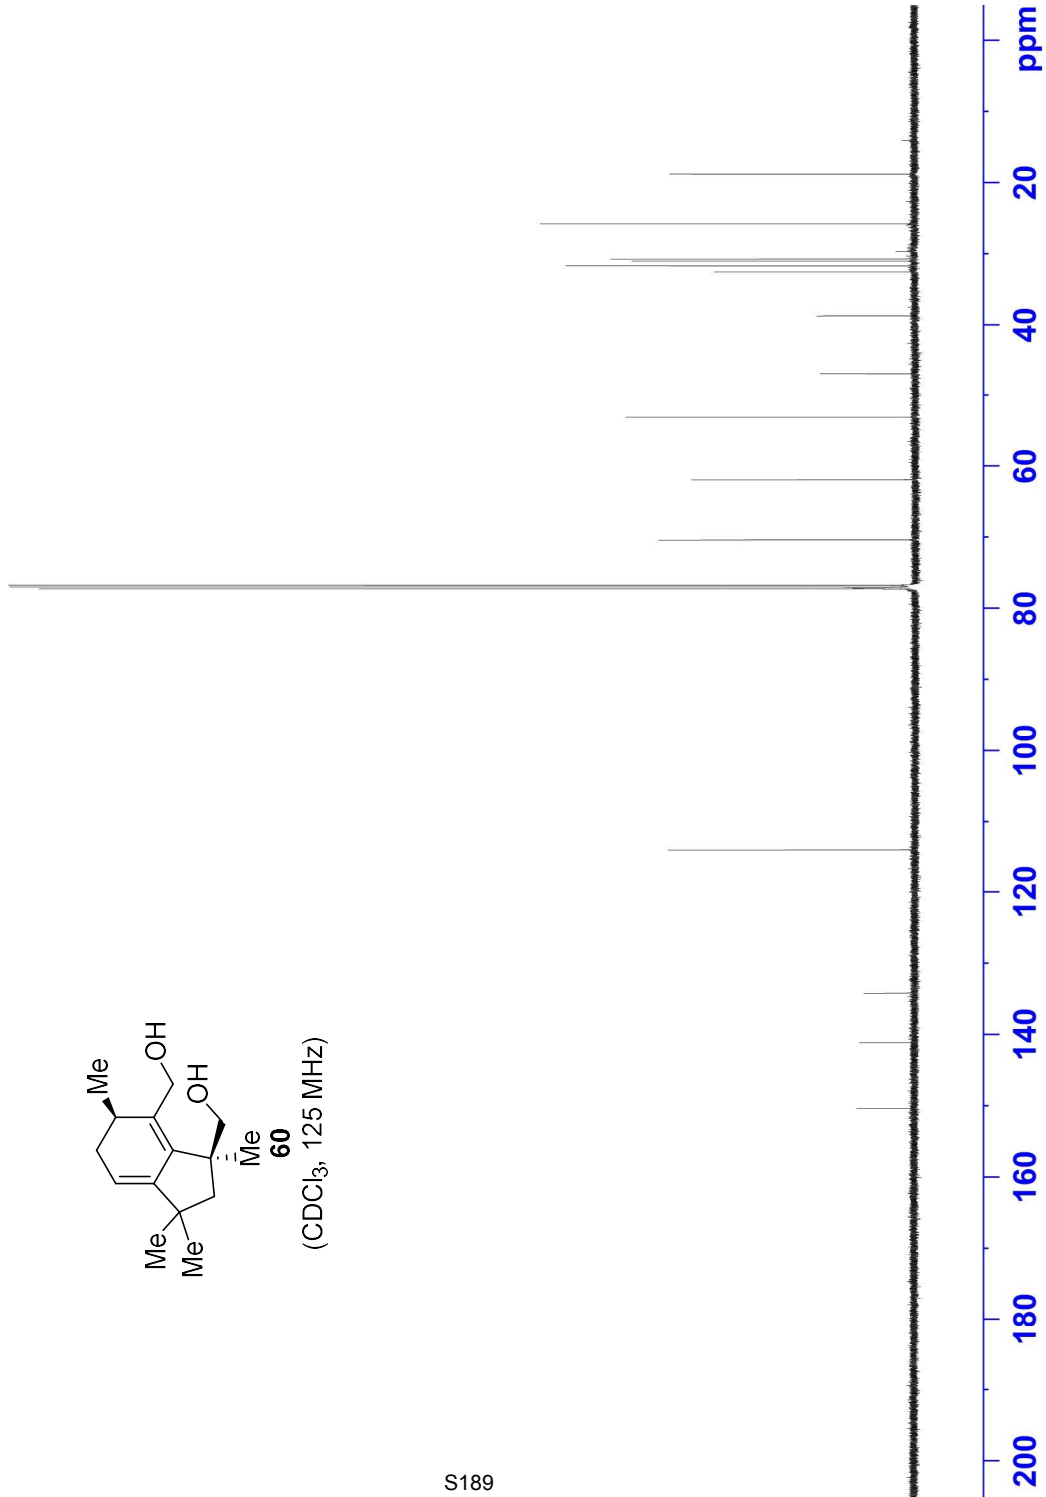

Current Data Parameters  
 NAME yh-4-106-2  
 EXPNO 1  
 PROCNO 1

F2 - Acquisition Parameters  
 Date\_ 20180523  
 Time\_ 21.50  
 INSTRUM spect  
 PROBHD 5 mm PABBO BB/  
 PULPROG zg  
 TD 59998  
 SOLVENT CDC13  
 NS 4  
 DS 0  
 SWH 10000.000 Hz  
 FIDRES 0.166672 Hz  
 AQ 2.9999001 sec  
 RG 133.95  
 DW 50.000 usec  
 DE 6.50 usec  
 TE 295.5 K  
 D1 4.0000000 sec  
 TD0 1

==== CHANNEL f1 =====  
 SFO1 499.8730869 MHz  
 NUC1 1H  
 P1 3.58 usec  
 PLW1 18.25000000 W

F2 - Processing parameters  
 SI 65536  
 SF 499.8700123 MHz  
 EM  
 WDW 0  
 SSB 0  
 LB 0.30 Hz  
 GB 0  
 PC 1.00

3.00  
2.99  
2.97  
2.99  
2.49  
2.48  
2.47  
2.46  
2.45  
2.44  
2.43  
2.43  
2.25  
2.22  
1.65  
1.62  
1.53  
1.25  
1.06  
0.96  
0.91

5.89  
5.88  
5.87  
5.87  
5.87

9.74  
9.67

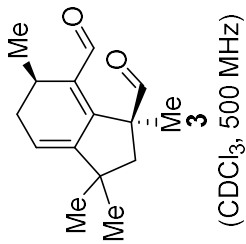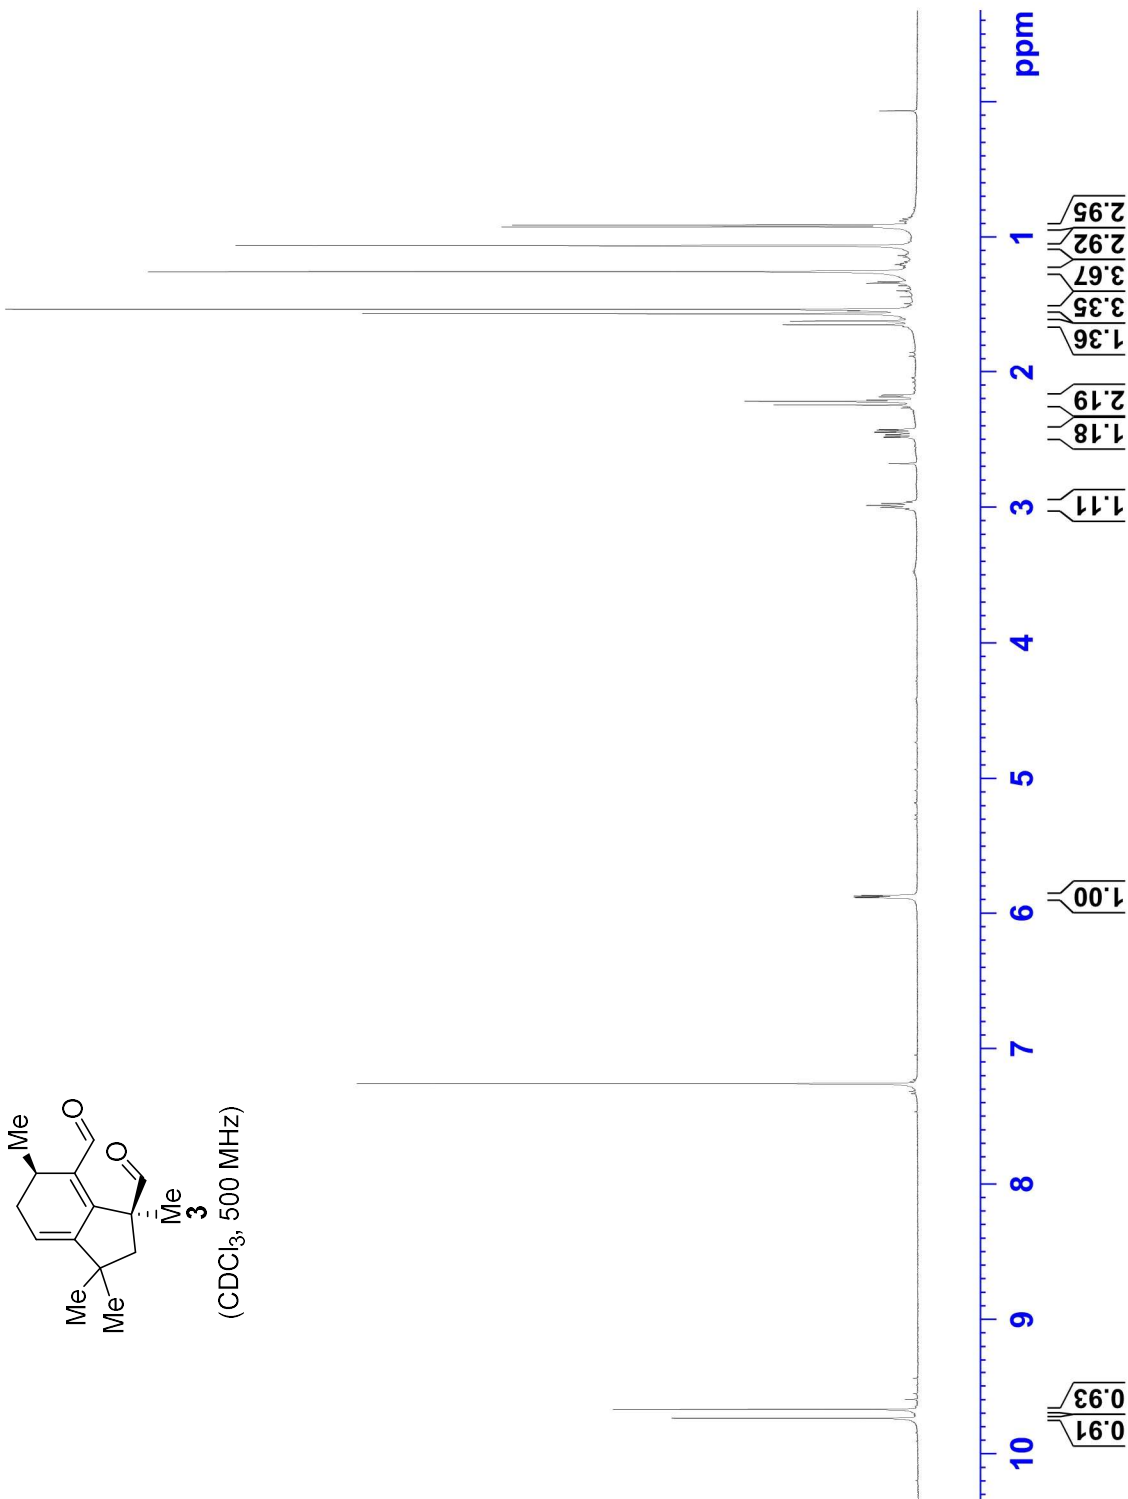

Current Data Parameters  
 NAME Yh-4-106-2  
 EXPNO 2  
 PROCNO 2

F2 - Acquisition Parameters  
 Date\_ 20180524  
 Time\_ 6.47  
 INSTRUM spect  
 PROBHD 5 mm PABBO BB/  
 PULPROG zgdc  
 TD 187496  
 SOLVENT CDC13  
 NS 5200  
 DS 0  
 SWH 31250.000 Hz  
 FIDRES 0.166670 Hz  
 AQ 2.9999361 sec  
 RG 2050  
 DW 16.000 usec  
 DE 6.50 usec  
 TE 297.5 K  
 D1 3.0000000 sec  
 D11 0.0300000 sec  
 TD0 1

==== CHANNEL f1 =====  
 SFO1 125.7049802 MHz  
 NUC1 13C  
 P1 10.00 usec  
 PLW1 72.83999634 W

==== CHANNEL f2 =====  
 SFO2 499.8724993 MHz  
 NUC2 1H  
 CPDPRG[2] waltz16  
 PCPD2 80.00 usec  
 PLW2 19.00000000 W  
 PLW12 0.29688001 W

F2 - Processing parameters  
 SI 1048576  
 SF 125.6924115 MHz  
 WDW EM  
 SSB 0  
 LB 0.30 Hz  
 GB 0  
 PC 1.40

199.91  
 189.82  
 155.24  
 149.57  
 136.01  
 123.72  
 56.48  
 50.62  
 40.47  
 30.62  
 30.61  
 28.76  
 25.34  
 24.29  
 18.35

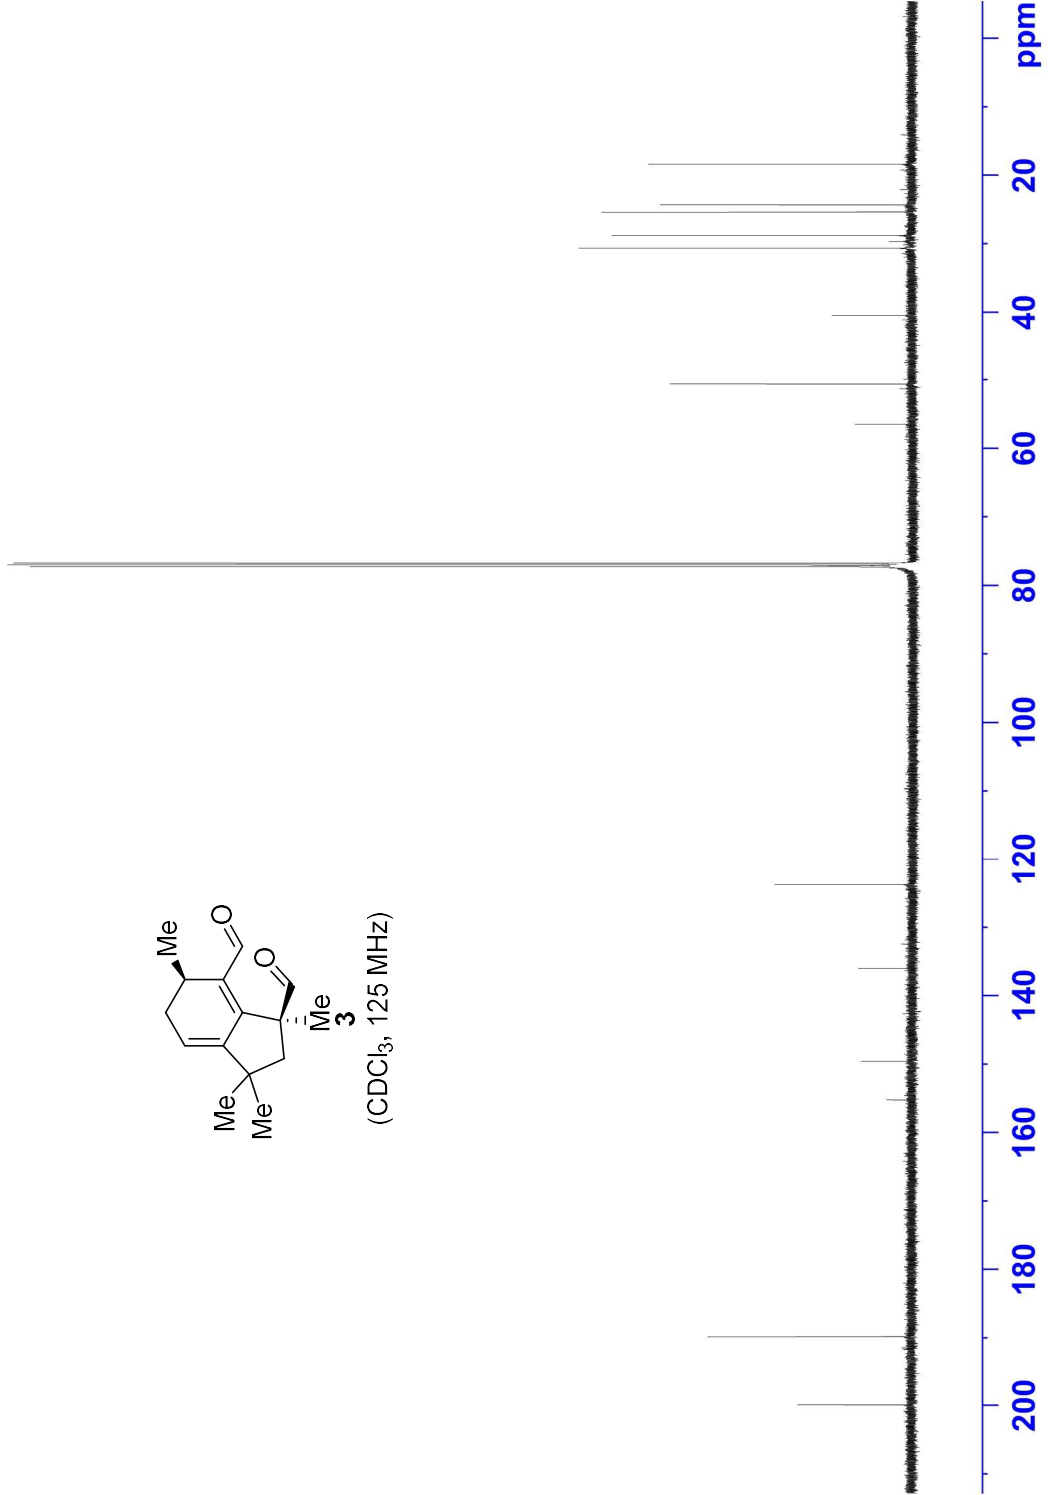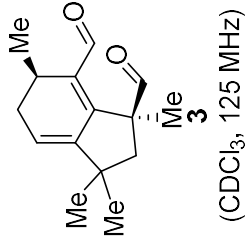

Current Data Parameters  
 NAME yh-7-74-sm  
 EXPNO 1  
 PROCNO 1

F2 - Acquisition Parameters  
 Date\_ 20191106  
 Time\_ 15.07  
 INSTRUM spect  
 PROBHD 5 mm PATXI 1H/  
 PULPROG zg  
 TD 59998  
 SOLVENT CDC13  
 NS 4  
 DS 0  
 SWH 10000.000 Hz  
 FIDRES 0.166672 Hz  
 AQ 2.9999001 sec  
 RG 196.79  
 DW 50.000 usec  
 DE 10.00 usec  
 TE 294.4 K  
 D1 2.0000000 sec  
 TD0 1

==== CHANNEL f1 =====  
 SF01 500.1330885 MHz  
 NUC1 1H  
 P1 9.90 usec  
 PLW1 12.19999981 W

F2 - Processing parameters  
 SI 65536  
 SF 500.1300135 MHz  
 WDW EM  
 SSB 0  
 LB 0.30 Hz  
 GB 0  
 PC 1.00

4.70  
4.68  
4.23  
4.22  
4.20  
4.19  
2.55  
2.54  
2.52  
2.51  
2.45  
2.45  
2.44  
2.04  
2.03  
2.02  
2.01  
2.00  
1.99  
1.94  
1.94  
1.93  
1.91  
1.90  
1.89  
1.88  
1.76  
1.72  
1.68  
1.67  
1.67  
1.66  
1.66  
1.65  
1.46  
1.48  
1.46  
1.45  
1.45  
1.45

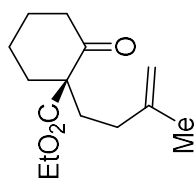

**S47**  
 (CDCl<sub>3</sub>, 500 MHz)

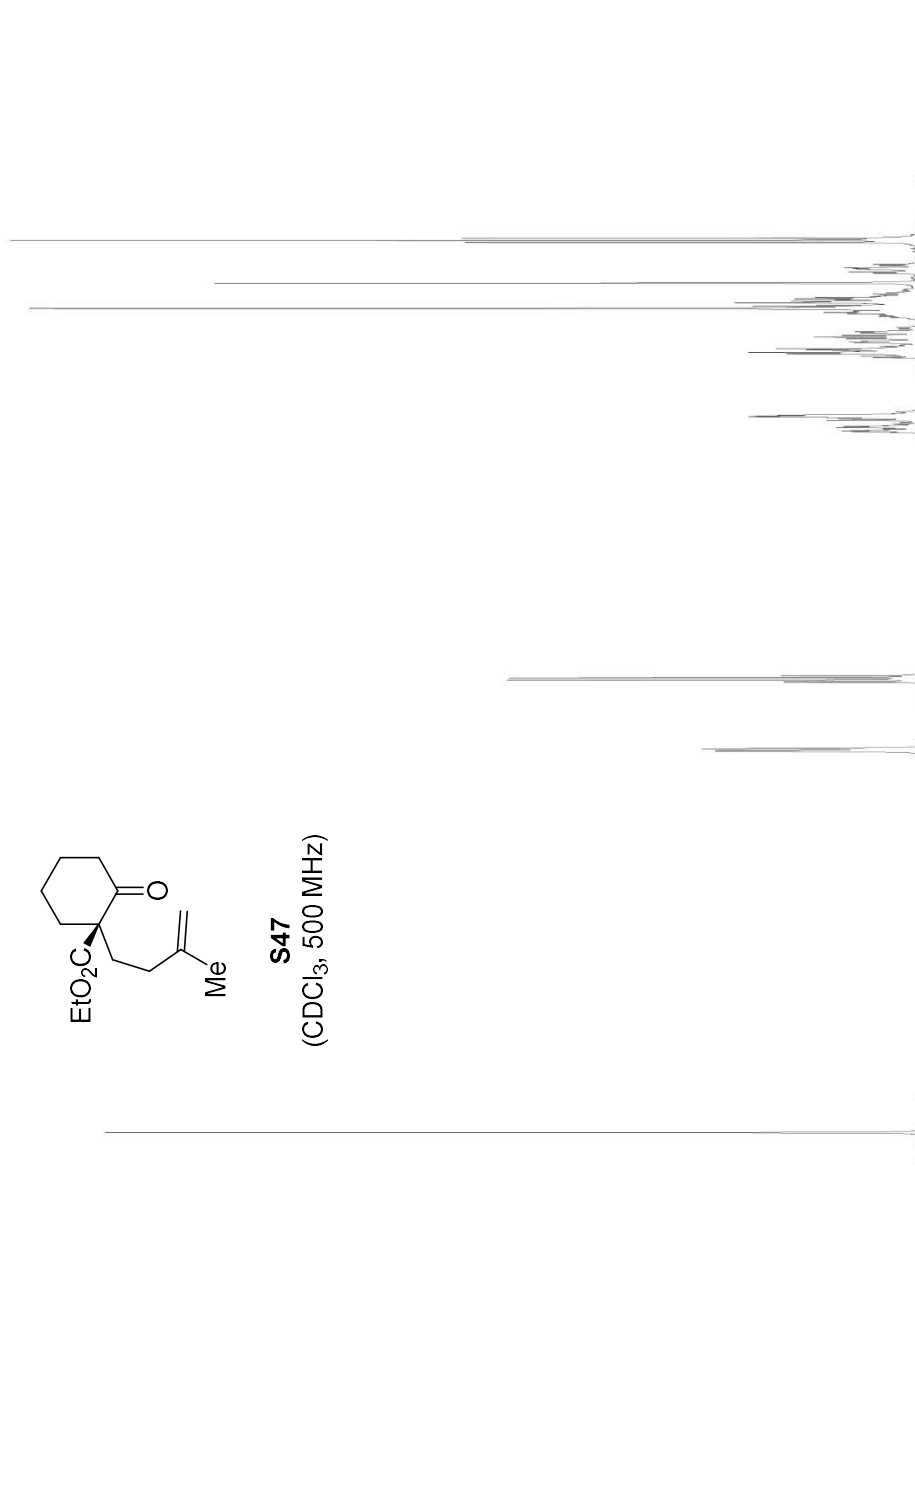

9.5 9.0 8.5 8.0 7.5 7.0 6.5 6.0 5.5 5.0 4.5 4.0 3.5 3.0 2.5 2.0 1.5 1.0 0.5 ppm

3.30  
1.16  
7.58  
2.15  
2.37  
2.04  
1.23  
1.97  
2.00



Current Data Parameters  
 NAME Yh-7-74-sm  
 EXPNO 2  
 PROCNO 1

F2 - Acquisition Parameters  
 Date\_ 20191107  
 Time\_ 22.12 h  
 INSTRUM spect  
 PROBHD Z113652\_0187 (zgd)  
 PULPROG 187496  
 TD 11  
 SOLVENT CDC13  
 NS 0  
 DS 31250.000 Hz  
 SWH 0.333340 Hz  
 FIDRES 2.9999361 sec  
 AQ 2050  
 RG 16.000 usec  
 DE 6.50 usec  
 TE 295.5 K  
 D1 3.0000000 sec  
 D11 0.0300000 sec  
 TD0 1  
 SF01 125.7049802 MHz  
 NUC1 13C  
 P1 10.00 usec  
 PLW1 72.83999634 W  
 SF02 499.8724993 MHz  
 NUC2 1H  
 CPDPRG12 waltz16  
 PCPD2 80.00 usec  
 PLW2 19.0000000 W  
 PLW12 0.29688001 W

F2 - Processing parameters  
 SI 1048576  
 SF 125.6924115 MHz  
 WDW EM  
 SSB 0  
 LB 0.30 Hz  
 GB 0  
 PC 1.40

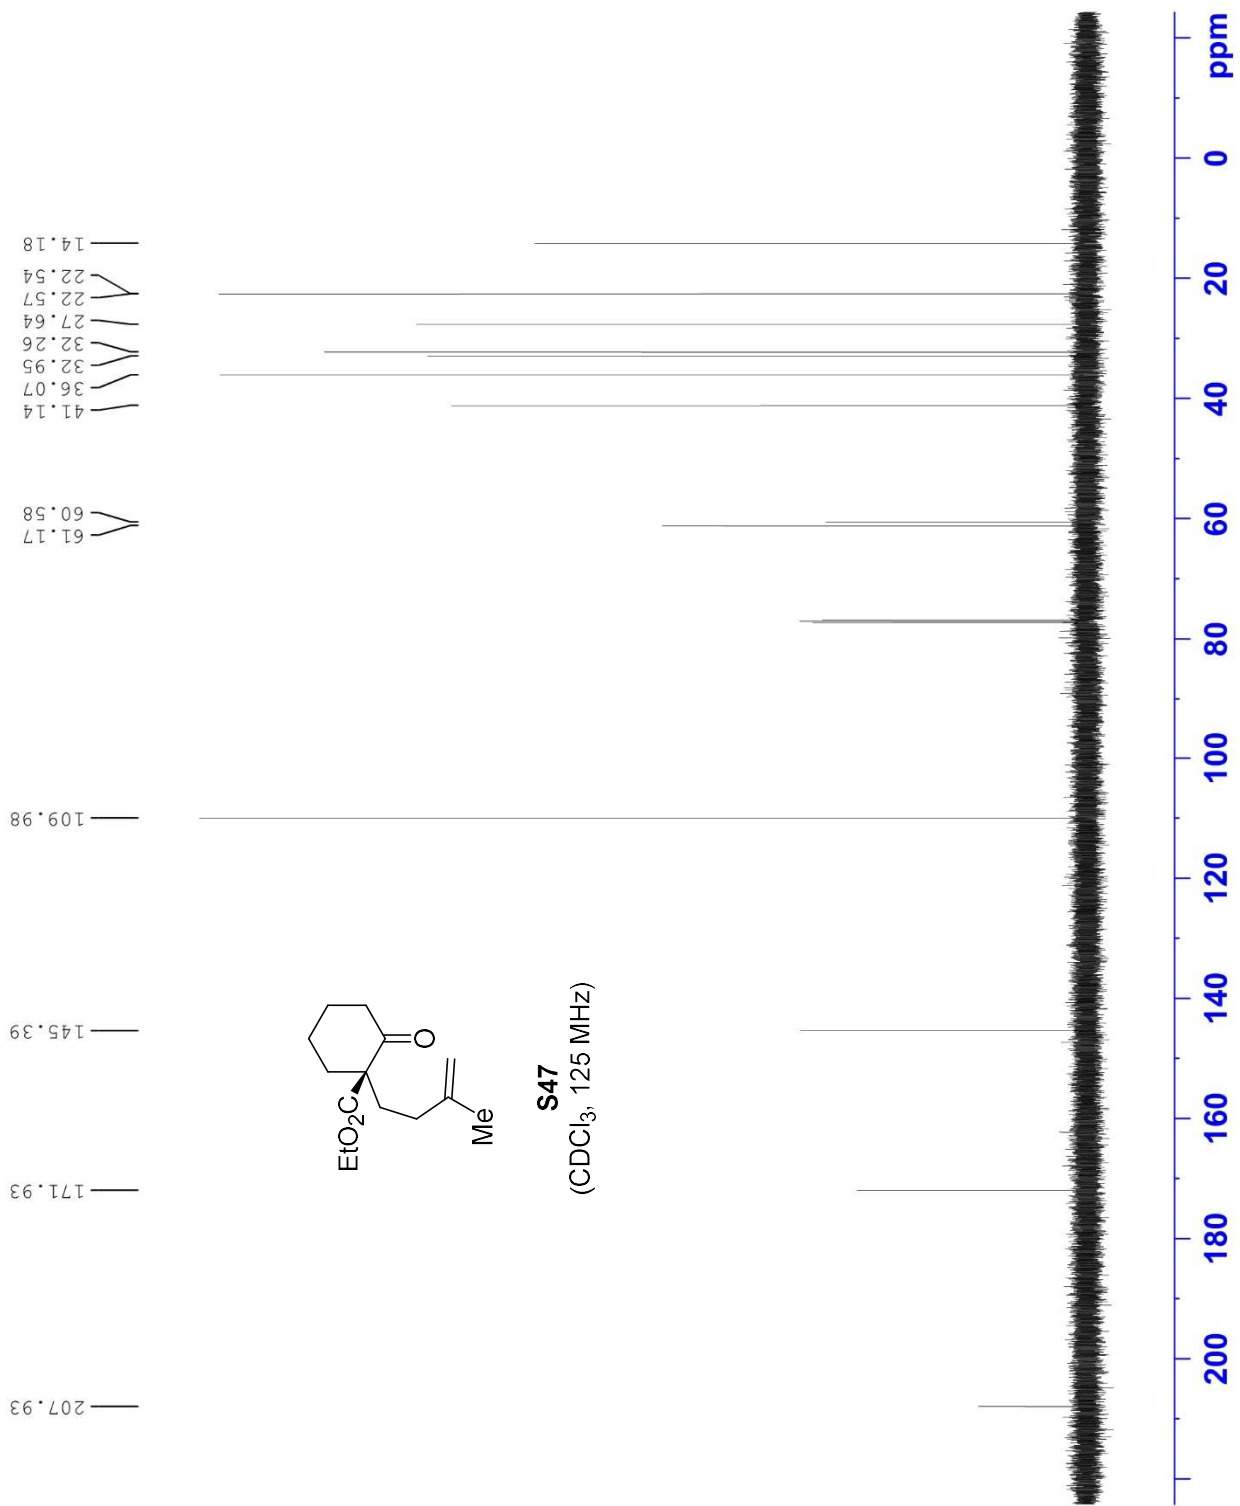

Current Data Parameters  
 NAME yh-7-74  
 EXPNO 1  
 PROCNO 1

F2 - Acquisition Parameters

Date\_ 20191106  
 Time\_ 22.58 h  
 INSTRUM spect  
 PROBHD Z113652\_0187 (zg)  
 PULPROG 59998  
 TD CDC13  
 SOLVENT 4  
 NS 0  
 DS 10000.000 Hz  
 SWH 0.333344 Hz  
 FIDRES 2.9999001 sec  
 AQ 77.07  
 RG 50.000 usec  
 DE 6.50 usec  
 TE 295.3 K  
 D1 3.0000000 sec  
 TD0 1  
 SFO1 499.8730869 MHz  
 NUC1 <sup>1</sup>H  
 P1 10.75 usec  
 PLW1 18.2500000 W

F2 - Processing parameters

SI 65536  
 SF 499.8700121 MHz  
 WDW EM  
 SSB 0  
 LB 0.30 Hz  
 GB 0  
 PC 1.00

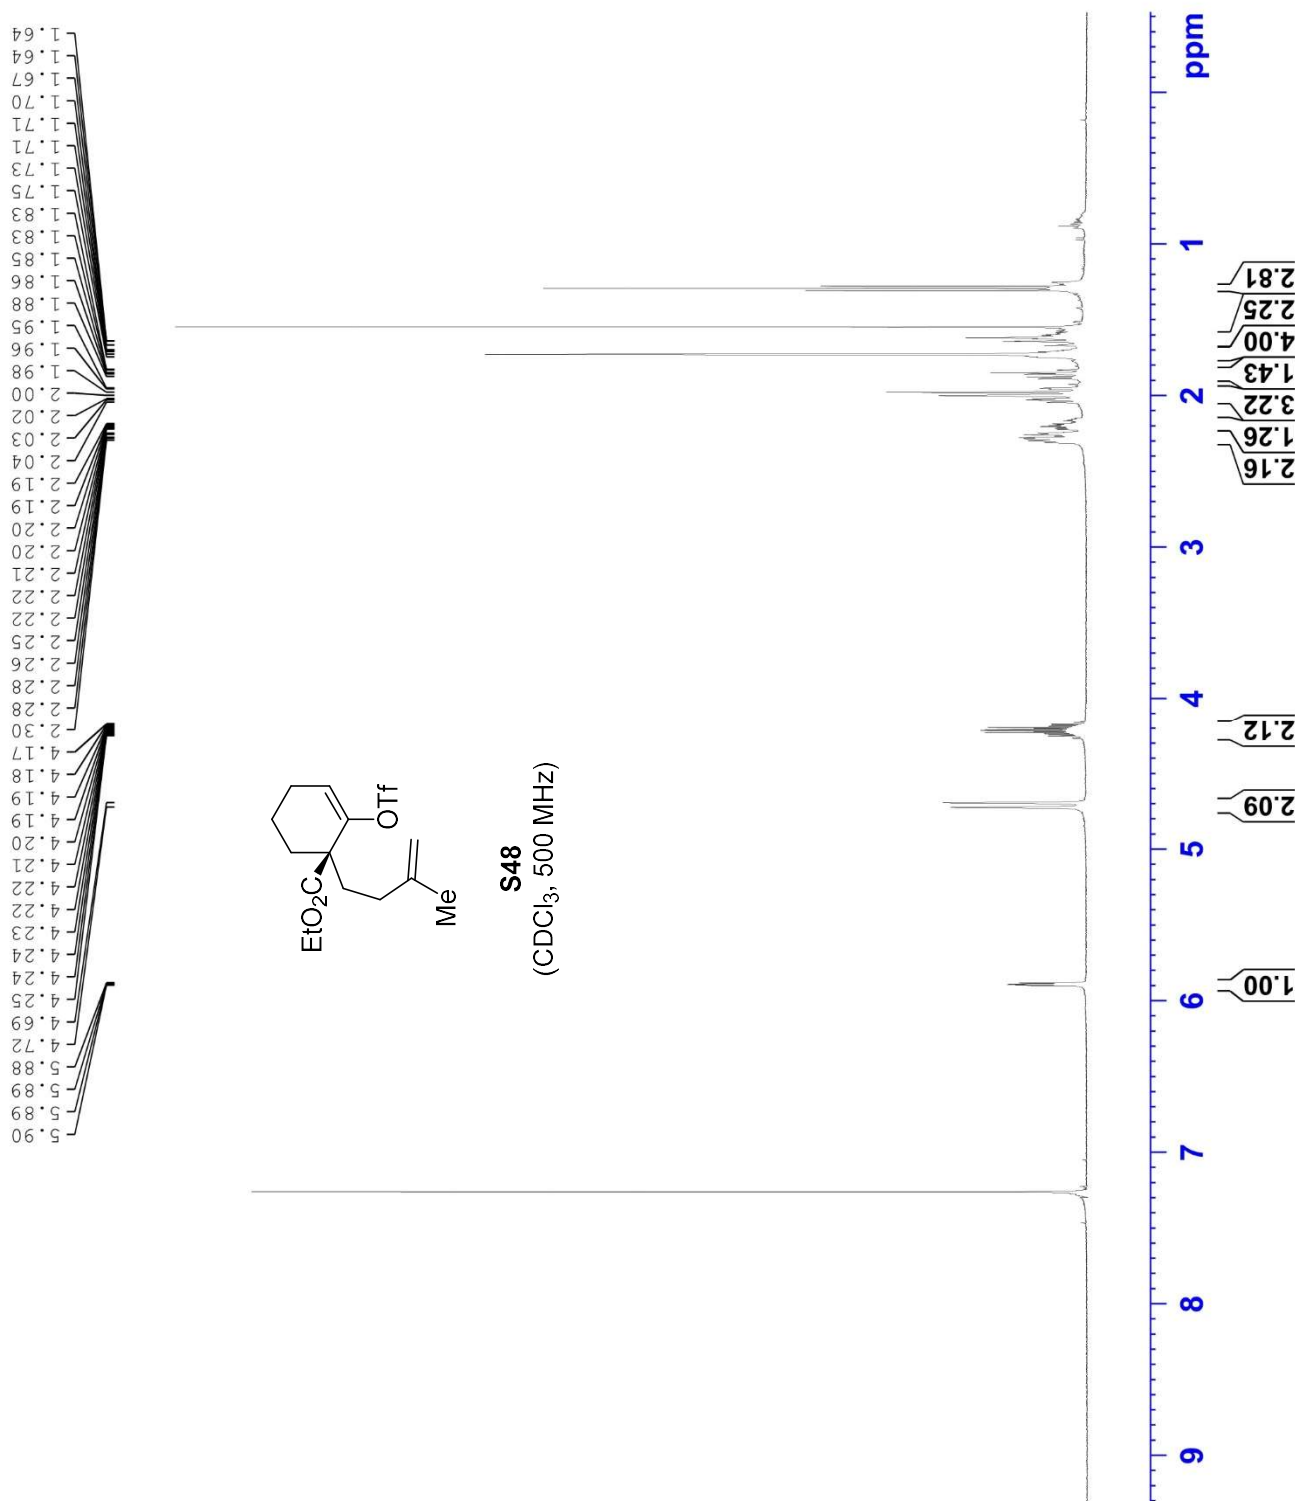

Current Data Parameters  
 NAME Yh-7-74  
 EXPNO 2  
 PROCNO 1

F2 - Acquisition Parameters  
 Date\_ 20191107  
 Time\_ 22.20 h  
 INSTRUM spect  
 PROBHD Z113652\_0187 (

PULPROG zgdc  
 TD 187496  
 SOLVENT CDCl3  
 NS 13  
 DS 0

SWH 31250.000 Hz  
 FIDRES 0.333340 Hz  
 AQ 2.9999361 sec  
 RG 2050

DW 16.000 usec  
 DE 6.50 usec  
 TE 295.7 K  
 D1 3.0000000 sec  
 D11 0.0300000 sec

TD0 1  
 SF01 125.7049802 MHz  
 NUC1 13C

P1 10.00 usec  
 PLW1 72.83999634 W  
 SF02 499.8724993 MHz  
 NUC2 1H

CPDPRG12 waltz16  
 PCPD2 80.00 usec  
 PLW2 19.0000000 W  
 PLW12 0.29688001 W

F2 - Processing parameters  
 SI 1048576  
 SF 125.6924115 MHz  
 WDW EM  
 SSB 0  
 LB 0.30 Hz  
 GB 0  
 PC 1.40

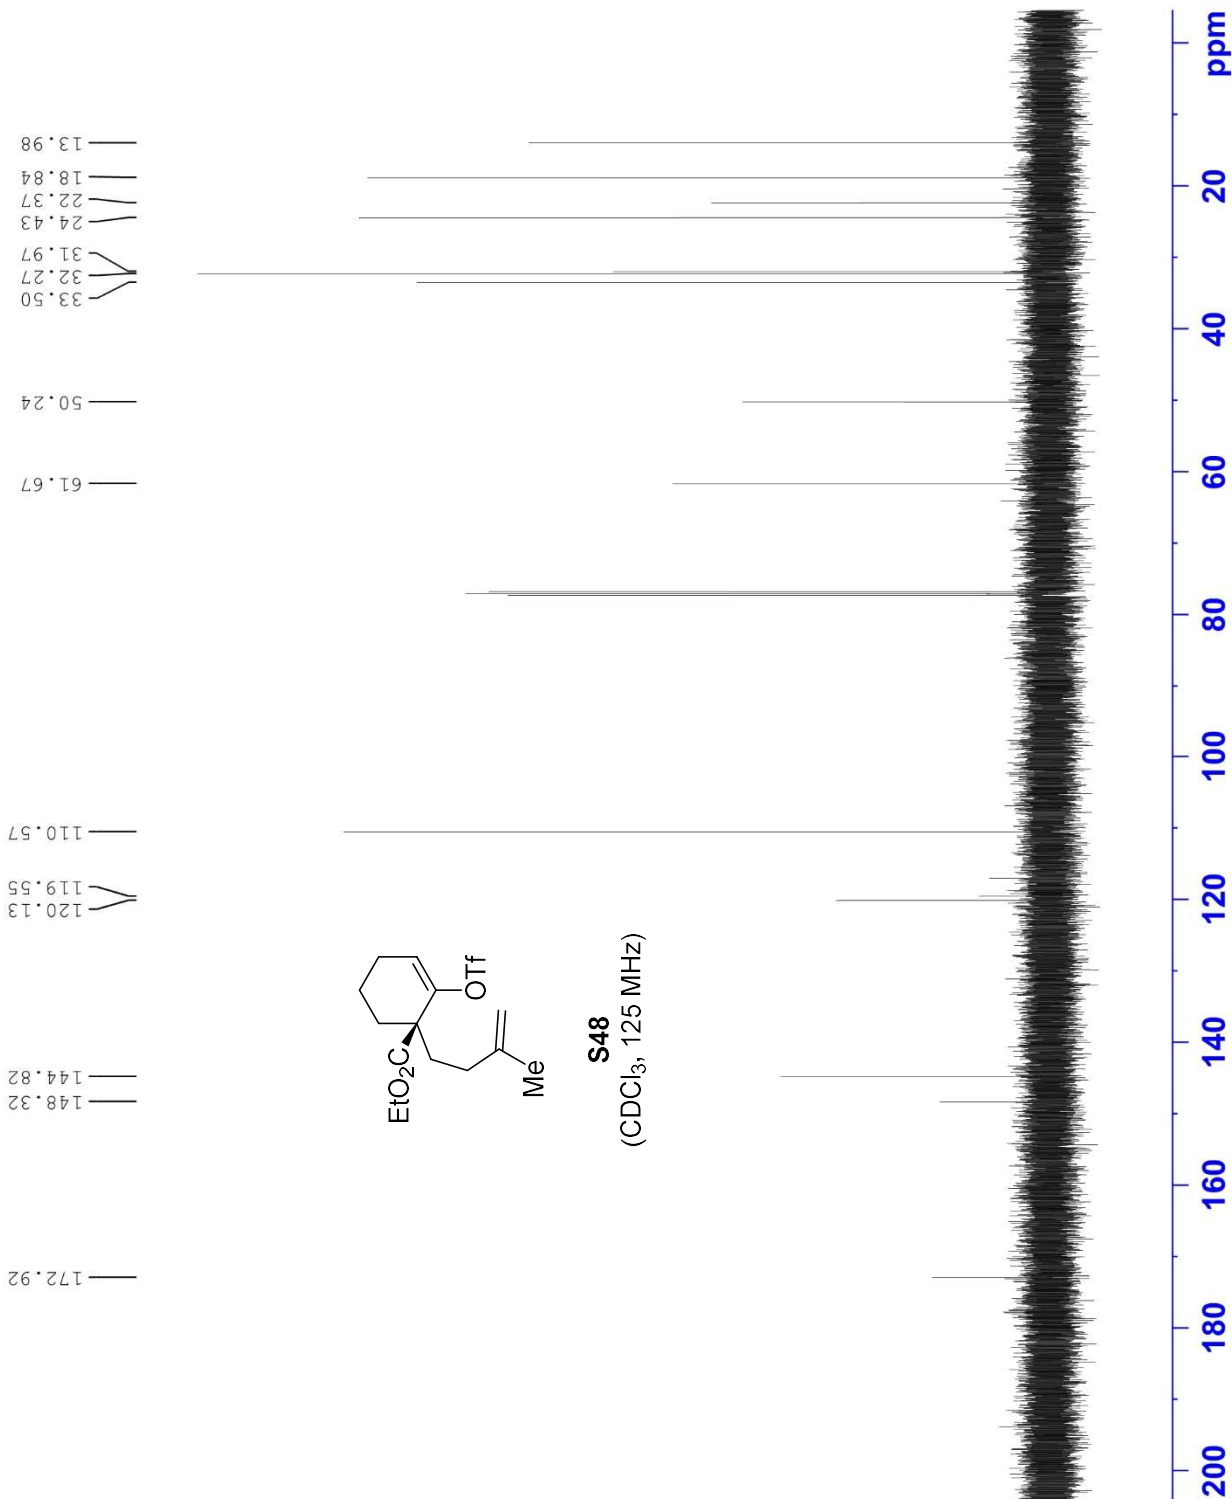

Current Data Parameters  
 NAME Yh-7-76-a  
 EXPNO 1  
 PROCNO 1

F2 - Acquisition Parameters

Date\_ 20191108  
 Time\_ 0.02 h  
 INSTRUM spect  
 PROBHD Z113652\_0187 (  
 PULPROG zg  
 TD 59998  
 SOLVENT CDC13  
 NS 4  
 DS 0  
 SWH 10000.000 Hz  
 FIDRES 0.333344 Hz  
 AQ 2.9999001 sec  
 RG 29.95  
 DW 50.000 usec  
 DE 6.50 usec  
 TE 295.4 K  
 D1 3.0000000 sec  
 TD0 1  
 SFO1 499.8730869 MHz  
 NUC1 1H  
 P1 10.75 usec  
 PLW1 18.2500000 W

F2 - Processing parameters

SI 65536  
 SF 499.8700125 MHz  
 WDW EM  
 SSB 0  
 LB 0.30 Hz  
 GB 0  
 PC 1.00

5.73  
5.72  
5.27  
5.26  
5.25  
5.24  
5.24  
5.24  
4.16  
4.15  
4.14  
4.14  
4.14  
4.12  
4.12  
4.11  
4.11  
4.10  
4.09  
4.08  
4.07  
2.17  
2.17  
2.16  
2.15  
2.14  
2.14  
2.10  
2.09  
2.07  
2.05  
2.03  
2.02  
2.01  
1.99  
1.85  
1.83  
1.82  
1.80  
1.78  
1.76  
1.74  
1.63  
1.63  
1.62  
1.61  
1.61  
1.60  
1.59  
1.59  
1.58  
1.57  
1.56  
1.56  
1.55  
1.53  
1.52  
1.24  
1.22  
1.21  
1.19  
1.18  
1.12  
1.00  
0.54

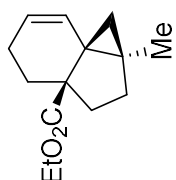

S49  
 (CDCl<sub>3</sub>, 500 MHz)

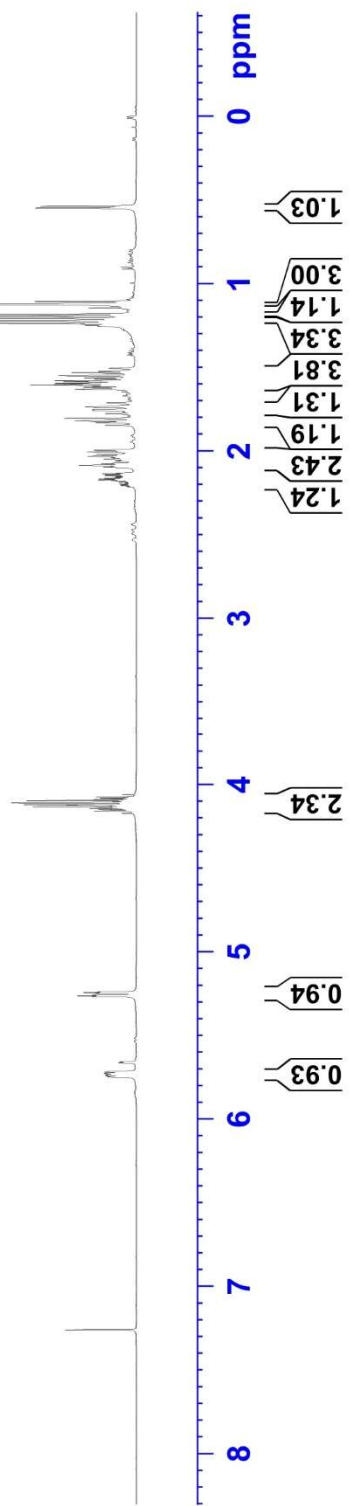

176.31

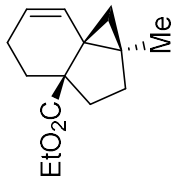

**S49**  
(CDCl<sub>3</sub>, 125 MHz)

128.92  
126.63  
125.07

59.98  
52.51

32.91  
32.28  
30.81  
27.03  
23.68  
22.26  
19.61  
14.27

200 180 160 140 120 100 80 60 40 20 ppm

Current Data Parameters  
 NAME Yh-7-76-a  
 EXPNO 2  
 PROCNO 1

F2 - Acquisition Parameters  
 Date\_ 20191108  
 Time\_ 0.24 h  
 INSTRUM spect  
 PROBHD Z113652\_0187 (  
 PULPROG zgdc  
 TD 187496  
 SOLVENT CDCl3  
 NS 103  
 DS 0  
 SWH 31250.000 Hz  
 FIDRES 0.333340 Hz  
 AQ 2.9999361 sec  
 RG 2050  
 DW 16.000 usec  
 DE 6.50 usec  
 TE 296.6 K  
 D1 3.0000000 sec  
 D11 0.0300000 sec  
 TD0 1  
 SF01 125.7049802 MHz  
 NUC1 13C  
 P1 10.00 usec  
 PLW1 72.83999634 W  
 SF02 499.8724993 MHz  
 NUC2 1H  
 CPDPRG12 waltz16  
 PCPD2 80.00 usec  
 PLW2 19.0000000 W  
 PLW12 0.29688001 W

F2 - Processing parameters  
 SI 1048576  
 SF 125.6924115 MHz  
 WDW EM  
 SSB 0  
 LB 0.30 Hz  
 GB 0  
 PC 1.40
